# Supplementary material for: Iron(III) Complexes with Non-Steroidal Anti-Inflammatory Drugs: Structure, Antioxidant and Anticholinergic Activity, and Interaction with Biomolecules
Source: MDPI journal article supplement (doi:10.3390/ijms24076391), 2023-03-28

## checkCIF/PLATON report

Structure factors have been supplied for datablock(s) I

THIS REPORT IS FOR GUIDANCE ONLY. IF USED AS PART OF A REVIEW PROCEDURE FOR PUBLICATION, IT SHOULD NOT REPLACE THE EXPERTISE OF AN EXPERIENCED CRYSTALLOGRAPHIC REFEREE.

No syntax errors found.      CIF dictionary      Interpreting this report

### Datablock: I

---

|                 |                                                                       |                                     |
|-----------------|-----------------------------------------------------------------------|-------------------------------------|
| Bond precision: | C-C = 0.0058 A                                                        | Wavelength=0.71073                  |
| Cell:           | a=15.8519(11)                                                         | b=18.1237(11)      c=22.7624(16)    |
|                 | alpha=83.530(3)                                                       | beta=84.653(4)      gamma=86.714(4) |
| Temperature:    | 295 K                                                                 |                                     |
|                 | Calculated                                                            | Reported                            |
| Volume          | 6462.4(8)                                                             | 6462.4(8)                           |
| Space group     | P -1                                                                  | P -1                                |
| Hall group      | -P 1                                                                  | ?                                   |
| Moiety formula  | 2(C87 H72 Cl12 Fe3 N6 O16),<br>2(C14 H11 Cl2 N O2), 2(C14<br>Fe), 3(C | C102.50 H91 Cl18 Fe4 N7<br>O20.50   |
| Sum formula     | C205 H182 Cl36 Fe8 N14 O41                                            | C102.50 H91 Cl18 Fe4 N7<br>O20.50   |
| Mr              | 5220.66                                                               | 2610.43                             |
| Dx, g cm-3      | 1.342                                                                 | 1.341                               |
| Z               | 1                                                                     | 2                                   |
| Mu (mm-1)       | 0.873                                                                 | 0.873                               |
| F000            | 2658.0                                                                | 2658.0                              |
| F000'           | 2667.01                                                               |                                     |
| h, k, lmax      | 19, 22, 28                                                            | 19, 21, 28                          |
| Nref            | 25470                                                                 | 24332                               |
| Tmin, Tmax      | 0.846, 0.885                                                          | 0.870, 0.880                        |
| Tmin'           | 0.818                                                                 |                                     |

Correction method= # Reported T Limits: Tmin=0.870 Tmax=0.880  
AbsCorr = NUMERICAL

Data completeness= 0.955

Theta(max)= 26.021

R(reflections)= 0.0519( 16440)

wR2(reflections)=  
0.0850( 16440)

S = 1.000

Npar= 1543

---

The following ALERTS were generated. Each ALERT has the format

**test-name\_ALERT\_alert-type\_alert-level.**

Click on the hyperlinks for more details of the test.

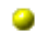

#### Alert level C

|                   |                                                  |        |        |
|-------------------|--------------------------------------------------|--------|--------|
| PLAT029_ALERT_3_C | _diffn_measured_fraction_theta_full value Low .  | 0.970  | Why?   |
| PLAT042_ALERT_1_C | Calc. and Reported MoietyFormula Strings Differ  | Please | Check  |
| PLAT250_ALERT_2_C | Large U3/U1 Ratio for Average U(i,j) Tensor .... | 2.4    | Note   |
| PLAT420_ALERT_2_C | D-H Bond Without Acceptor N1 --H11 .             | Please | Check  |
| PLAT420_ALERT_2_C | D-H Bond Without Acceptor N4 --H1185 .           | Please | Check  |
| PLAT420_ALERT_2_C | D-H Bond Without Acceptor N5 --H1186 .           | Please | Check  |
| PLAT420_ALERT_2_C | D-H Bond Without Acceptor N6 --H1187 .           | Please | Check  |
| PLAT420_ALERT_2_C | D-H Bond Without Acceptor N2 --H1188 .           | Please | Check  |
| PLAT420_ALERT_2_C | D-H Bond Without Acceptor N3 --H31 .             | Please | Check  |
| PLAT911_ALERT_3_C | Missing FCF Refl Between Thmin & STh/L= 0.600    | 489    | Report |

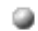

#### Alert level G

|                   |                                                  |       |        |
|-------------------|--------------------------------------------------|-------|--------|
| PLAT007_ALERT_5_G | Number of Unrefined Donor-H Atoms .....          | 19    | Report |
| PLAT045_ALERT_1_G | Calculated and Reported Z Differ by a Factor ... | 0.500 | Check  |
| PLAT300_ALERT_4_G | Atom Site Occupancy of C117 Constrained at       | 0.5   | Check  |
| PLAT300_ALERT_4_G | Atom Site Occupancy of C118 Constrained at       | 0.5   | Check  |
| PLAT300_ALERT_4_G | Atom Site Occupancy of O19 Constrained at        | 0.5   | Check  |
| PLAT300_ALERT_4_G | Atom Site Occupancy of O20 Constrained at        | 0.5   | Check  |
| PLAT300_ALERT_4_G | Atom Site Occupancy of N7 Constrained at         | 0.5   | Check  |
| PLAT300_ALERT_4_G | Atom Site Occupancy of C88 Constrained at        | 0.5   | Check  |
| PLAT300_ALERT_4_G | Atom Site Occupancy of C89 Constrained at        | 0.5   | Check  |
| PLAT300_ALERT_4_G | Atom Site Occupancy of C90 Constrained at        | 0.5   | Check  |
| PLAT300_ALERT_4_G | Atom Site Occupancy of C91 Constrained at        | 0.5   | Check  |
| PLAT300_ALERT_4_G | Atom Site Occupancy of C92 Constrained at        | 0.5   | Check  |
| PLAT300_ALERT_4_G | Atom Site Occupancy of C93 Constrained at        | 0.5   | Check  |
| PLAT300_ALERT_4_G | Atom Site Occupancy of C94 Constrained at        | 0.5   | Check  |
| PLAT300_ALERT_4_G | Atom Site Occupancy of C95 Constrained at        | 0.5   | Check  |
| PLAT300_ALERT_4_G | Atom Site Occupancy of C96 Constrained at        | 0.5   | Check  |
| PLAT300_ALERT_4_G | Atom Site Occupancy of C97 Constrained at        | 0.5   | Check  |
| PLAT300_ALERT_4_G | Atom Site Occupancy of C98 Constrained at        | 0.5   | Check  |
| PLAT300_ALERT_4_G | Atom Site Occupancy of C99 Constrained at        | 0.5   | Check  |
| PLAT300_ALERT_4_G | Atom Site Occupancy of C100 Constrained at       | 0.5   | Check  |
| PLAT300_ALERT_4_G | Atom Site Occupancy of C101 Constrained at       | 0.5   | Check  |
| PLAT300_ALERT_4_G | Atom Site Occupancy of H1001 Constrained at      | 0.5   | Check  |
| PLAT300_ALERT_4_G | Atom Site Occupancy of H1189 Constrained at      | 0.5   | Check  |
| PLAT300_ALERT_4_G | Atom Site Occupancy of H71 Constrained at        | 0.5   | Check  |
| PLAT300_ALERT_4_G | Atom Site Occupancy of H891 Constrained at       | 0.5   | Check  |
| PLAT300_ALERT_4_G | Atom Site Occupancy of H892 Constrained at       | 0.5   | Check  |
| PLAT300_ALERT_4_G | Atom Site Occupancy of H911 Constrained at       | 0.5   | Check  |
| PLAT300_ALERT_4_G | Atom Site Occupancy of H921 Constrained at       | 0.5   | Check  |
| PLAT300_ALERT_4_G | Atom Site Occupancy of H931 Constrained at       | 0.5   | Check  |
| PLAT300_ALERT_4_G | Atom Site Occupancy of H941 Constrained at       | 0.5   | Check  |
| PLAT300_ALERT_4_G | Atom Site Occupancy of H981 Constrained at       | 0.5   | Check  |
| PLAT300_ALERT_4_G | Atom Site Occupancy of H991 Constrained at       | 0.5   | Check  |

|                   |                                                |                |       |       |
|-------------------|------------------------------------------------|----------------|-------|-------|
| PLAT300_ALERT_4_G | Atom Site Occupancy of C119                    | Constrained at | 0.5   | Check |
| PLAT300_ALERT_4_G | Atom Site Occupancy of C120                    | Constrained at | 0.5   | Check |
| PLAT300_ALERT_4_G | Atom Site Occupancy of O21                     | Constrained at | 0.5   | Check |
| PLAT300_ALERT_4_G | Atom Site Occupancy of O22                     | Constrained at | 0.5   | Check |
| PLAT300_ALERT_4_G | Atom Site Occupancy of N8                      | Constrained at | 0.5   | Check |
| PLAT300_ALERT_4_G | Atom Site Occupancy of C102                    | Constrained at | 0.5   | Check |
| PLAT300_ALERT_4_G | Atom Site Occupancy of C103                    | Constrained at | 0.5   | Check |
| PLAT300_ALERT_4_G | Atom Site Occupancy of C104                    | Constrained at | 0.5   | Check |
| PLAT300_ALERT_4_G | Atom Site Occupancy of C105                    | Constrained at | 0.5   | Check |
| PLAT300_ALERT_4_G | Atom Site Occupancy of C106                    | Constrained at | 0.5   | Check |
| PLAT300_ALERT_4_G | Atom Site Occupancy of C107                    | Constrained at | 0.5   | Check |
| PLAT300_ALERT_4_G | Atom Site Occupancy of C108                    | Constrained at | 0.5   | Check |
| PLAT300_ALERT_4_G | Atom Site Occupancy of C109                    | Constrained at | 0.5   | Check |
| PLAT300_ALERT_4_G | Atom Site Occupancy of C110                    | Constrained at | 0.5   | Check |
| PLAT300_ALERT_4_G | Atom Site Occupancy of C111                    | Constrained at | 0.5   | Check |
| PLAT300_ALERT_4_G | Atom Site Occupancy of C112                    | Constrained at | 0.5   | Check |
| PLAT300_ALERT_4_G | Atom Site Occupancy of C113                    | Constrained at | 0.5   | Check |
| PLAT300_ALERT_4_G | Atom Site Occupancy of C114                    | Constrained at | 0.5   | Check |
| PLAT300_ALERT_4_G | Atom Site Occupancy of C115                    | Constrained at | 0.5   | Check |
| PLAT300_ALERT_4_G | Atom Site Occupancy of H1031                   | Constrained at | 0.5   | Check |
| PLAT300_ALERT_4_G | Atom Site Occupancy of H1032                   | Constrained at | 0.5   | Check |
| PLAT300_ALERT_4_G | Atom Site Occupancy of H1051                   | Constrained at | 0.5   | Check |
| PLAT300_ALERT_4_G | Atom Site Occupancy of H1061                   | Constrained at | 0.5   | Check |
| PLAT300_ALERT_4_G | Atom Site Occupancy of H1071                   | Constrained at | 0.5   | Check |
| PLAT300_ALERT_4_G | Atom Site Occupancy of H1081                   | Constrained at | 0.5   | Check |
| PLAT300_ALERT_4_G | Atom Site Occupancy of H1121                   | Constrained at | 0.5   | Check |
| PLAT300_ALERT_4_G | Atom Site Occupancy of H1131                   | Constrained at | 0.5   | Check |
| PLAT300_ALERT_4_G | Atom Site Occupancy of H1141                   | Constrained at | 0.5   | Check |
| PLAT300_ALERT_4_G | Atom Site Occupancy of H1184                   | Constrained at | 0.5   | Check |
| PLAT300_ALERT_4_G | Atom Site Occupancy of H221                    | Constrained at | 0.5   | Check |
| PLAT300_ALERT_4_G | Atom Site Occupancy of O18                     | Constrained at | 0.5   | Check |
| PLAT300_ALERT_4_G | Atom Site Occupancy of C117                    | Constrained at | 0.5   | Check |
| PLAT300_ALERT_4_G | Atom Site Occupancy of H1171                   | Constrained at | 0.5   | Check |
| PLAT300_ALERT_4_G | Atom Site Occupancy of H1172                   | Constrained at | 0.5   | Check |
| PLAT300_ALERT_4_G | Atom Site Occupancy of H1173                   | Constrained at | 0.5   | Check |
| PLAT300_ALERT_4_G | Atom Site Occupancy of H1190                   | Constrained at | 0.5   | Check |
| PLAT300_ALERT_4_G | Atom Site Occupancy of H232                    | Constrained at | 0.5   | Check |
| PLAT300_ALERT_4_G | Atom Site Occupancy of H234                    | Constrained at | 0.5   | Check |
| PLAT300_ALERT_4_G | Atom Site Occupancy of O24                     | Constrained at | 0.5   | Check |
| PLAT300_ALERT_4_G | Atom Site Occupancy of H243                    | Constrained at | 0.5   | Check |
| PLAT300_ALERT_4_G | Atom Site Occupancy of H244                    | Constrained at | 0.5   | Check |
| PLAT302_ALERT_4_G | Anion/Solvent/Minor-Residue Disorder (Resd 2 ) |                | 100%  | Note  |
| PLAT302_ALERT_4_G | Anion/Solvent/Minor-Residue Disorder (Resd 3 ) |                | 100%  | Note  |
| PLAT302_ALERT_4_G | Anion/Solvent/Minor-Residue Disorder (Resd 6 ) |                | 100%  | Note  |
| PLAT302_ALERT_4_G | Anion/Solvent/Minor-Residue Disorder (Resd 8 ) |                | 100%  | Note  |
| PLAT304_ALERT_4_G | Non-Integer Number of Atoms in ..... (Resd 8 ) |                | 1.50  | Check |
| PLAT413_ALERT_2_G | Short Inter XH3 .. XHn H1171 ..H22 .           |                | 2.10  | Ang.  |
|                   |                                                | x,y,z =        | 1_555 | Check |
| PLAT413_ALERT_2_G | Short Inter XH3 .. XHn H1173 ..H752 .          |                | 2.09  | Ang.  |
|                   |                                                | x,y,z =        | 1_555 | Check |
| PLAT417_ALERT_2_G | Short Inter D-H..H-D H91 ..H221 .              |                | 2.09  | Ang.  |
|                   |                                                | x,y,z =        | 1_555 | Check |
| PLAT432_ALERT_2_G | Short Inter X...Y Contact C117 ..C10 .         |                | 3.19  | Ang.  |
|                   |                                                | x,y,z =        | 1_555 | Check |
| PLAT432_ALERT_2_G | Short Inter X...Y Contact O21 ..C106 .         |                | 2.49  | Ang.  |
|                   |                                                | -x,1-y,-z =    | 2_565 | Check |
| PLAT432_ALERT_2_G | Short Inter X...Y Contact O21 ..C105 .         |                | 2.50  | Ang.  |

|                                                                    |       |                       |   |                          |
|--------------------------------------------------------------------|-------|-----------------------|---|--------------------------|
| PLAT432_ALERT_2_G Short Inter X...Y Contact                        | 021   | -x,1-y,-z =<br>..C104 | . | 2_565 Check<br>2.74 Ang. |
| PLAT432_ALERT_2_G Short Inter X...Y Contact                        | 021   | -x,1-y,-z =<br>..C107 | . | 2_565 Check<br>2.76 Ang. |
| PLAT432_ALERT_2_G Short Inter X...Y Contact                        | 021   | -x,1-y,-z =<br>..C109 | . | 2_565 Check<br>2.97 Ang. |
| PLAT432_ALERT_2_G Short Inter X...Y Contact                        | 021   | -x,1-y,-z =<br>..C108 | . | 2_565 Check<br>2.99 Ang. |
| PLAT432_ALERT_2_G Short Inter X...Y Contact                        | 024   | -x,1-y,-z =<br>..C114 | . | 2_565 Check<br>2.97 Ang. |
| PLAT432_ALERT_2_G Short Inter X...Y Contact                        | 024   | x,y,z =<br>..C116     | . | 1_555 Check<br>2.99 Ang. |
| PLAT432_ALERT_2_G Short Inter X...Y Contact                        | C104  | x,1+y,z =<br>..C117   | . | 1_565 Check<br>3.18 Ang. |
| PLAT432_ALERT_2_G Short Inter X...Y Contact                        | C105  | x,y,z =<br>..C117     | . | 1_555 Check<br>2.38 Ang. |
| PLAT432_ALERT_2_G Short Inter X...Y Contact                        | C106  | x,y,z =<br>..C117     | . | 1_555 Check<br>3.16 Ang. |
| PLAT434_ALERT_2_G Short Inter HL..HL Contact                       | C15   | x,y,z =<br>..C117     | . | 1_555 Check<br>3.33 Ang. |
| PLAT434_ALERT_2_G Short Inter HL..HL Contact                       | C16   | x,y,z =<br>..C120     | . | 1_555 Check<br>3.27 Ang. |
| PLAT720_ALERT_4_G Number of Unusual/Non-Standard Labels            | ..... |                       |   | 24 Note                  |
| PLAT769_ALERT_4_G CIF Embedded explicitly supplied scattering data |       |                       |   | Please Note              |
| PLAT794_ALERT_5_G Tentative Bond Valency for Fe1                   | (III) | .                     |   | 3.17 Info                |
| PLAT794_ALERT_5_G Tentative Bond Valency for Fe2                   | (III) | .                     |   | 2.91 Info                |
| PLAT794_ALERT_5_G Tentative Bond Valency for Fe3                   | (III) | .                     |   | 3.02 Info                |
| PLAT808_ALERT_5_G No Parseable SHELXL Style Weighting Scheme Found |       |                       |   | Please Check             |
| PLAT860_ALERT_3_G Number of Least-Squares Restraints               | ..... |                       |   | 3 Note                   |
| PLAT882_ALERT_1_G No Datum for _diffrn_reflms_av_unetI/netI        | ..... |                       |   | Please Do !              |
| PLAT910_ALERT_3_G Missing # of FCF Reflection(s) Below Theta(Min)  |       |                       |   | 3 Note                   |
| PLAT912_ALERT_4_G Missing # of FCF Reflections Above STh/L=        | 0.600 |                       |   | 696 Note                 |
| PLAT913_ALERT_3_G Missing # of Very Strong Reflections in FCF      | ....  |                       |   | 1 Note                   |
| PLAT929_ALERT_5_G No Weight Pars,Obs and Calc R1,wR2,S not Checked |       |                       |   | ! Info                   |
| PLAT940_ALERT_3_G Fsqd Refinement With I > n * Sigma(I) Only       | ..... |                       |   | Please Check             |
| PLAT960_ALERT_3_G Number of Intensities with I < - 2*sig(I)        | ...   |                       |   | 102 Check                |
| PLAT992_ALERT_5_G Repd & Actual _reflms_number_gt Values Differ by |       |                       |   | 4 Check                  |

---

0 **ALERT level A** = Most likely a serious problem - resolve or explain  
 0 **ALERT level B** = A potentially serious problem, consider carefully  
 10 **ALERT level C** = Check. Ensure it is not caused by an omission or oversight  
 110 **ALERT level G** = General information/check it is not something unexpected

3 ALERT type 1 CIF construction/syntax error, inconsistent or missing data  
 24 ALERT type 2 Indicator that the structure model may be wrong or deficient  
 7 ALERT type 3 Indicator that the structure quality may be low  
 79 ALERT type 4 Improvement, methodology, query or suggestion  
 7 ALERT type 5 Informative message, check

---

It is advisable to attempt to resolve as many as possible of the alerts in all categories. Often the minor alerts point to easily fixed oversights, errors and omissions in your CIF or refinement strategy, so attention to these fine details can be worthwhile. In order to resolve some of the more serious problems it may be necessary to carry out additional measurements or structure refinements. However, the purpose of your study may justify the reported deviations and the more serious of these should normally be commented upon in the discussion or experimental section of a paper or in the "special\_details" fields of the CIF. checkCIF was carefully designed to identify outliers and unusual parameters, but every test has its limitations and alerts that are not important in a particular case may appear. Conversely, the absence of alerts does not guarantee there are no aspects of the results needing attention. It is up to the individual to critically assess their own results and, if necessary, seek expert advice.

### **Publication of your CIF in IUCr journals**

A basic structural check has been run on your CIF. These basic checks will be run on all CIFs submitted for publication in IUCr journals (*Acta Crystallographica*, *Journal of Applied Crystallography*, *Journal of Synchrotron Radiation*); however, if you intend to submit to *Acta Crystallographica Section C* or *E* or *IUCrData*, you should make sure that full publication checks are run on the final version of your CIF prior to submission.

### **Publication of your CIF in other journals**

Please refer to the *Notes for Authors* of the relevant journal for any special instructions relating to CIF submission.

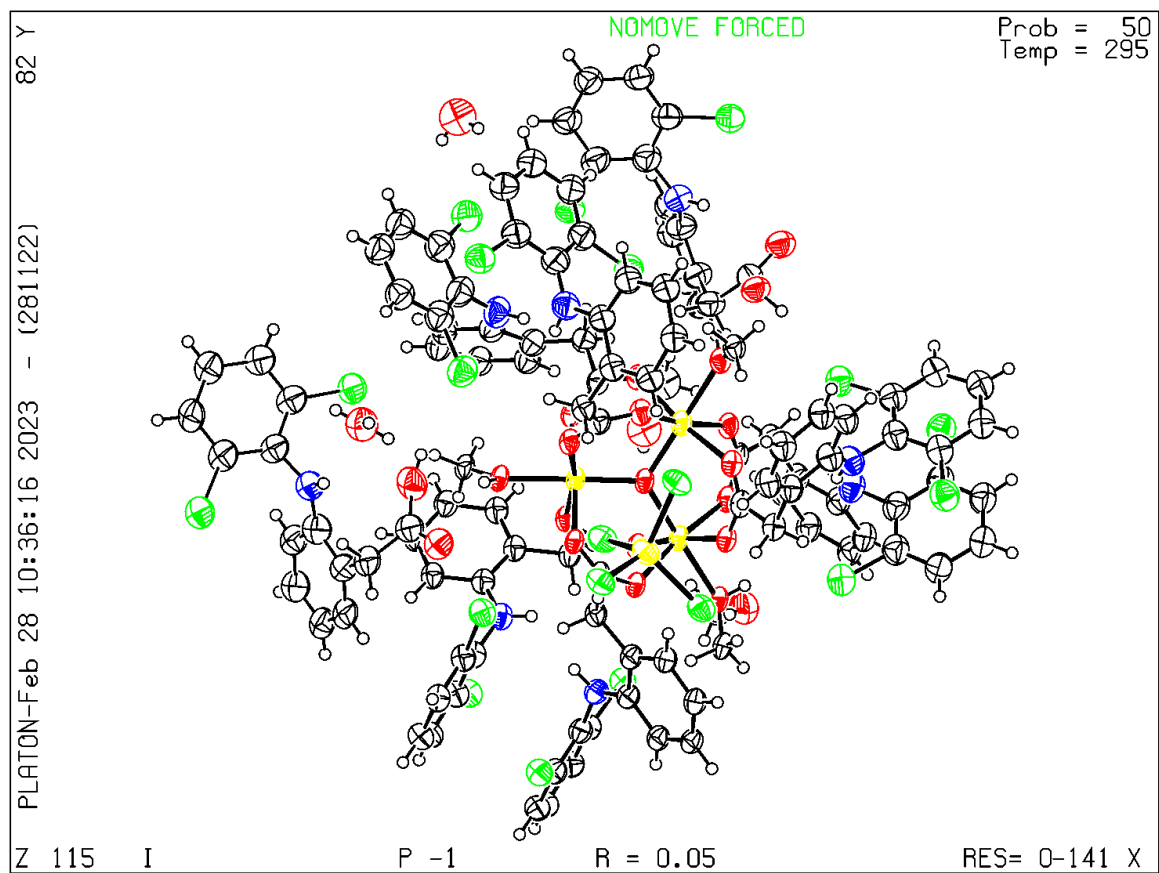

Supplement: s1 [file s1]
