# Supplementary material for: Iron(III) Complexes with Non-Steroidal Anti-Inflammatory Drugs: Structure, Antioxidant and Anticholinergic Activity, and Interaction with Biomolecules
Source: MDPI journal article supplement (doi:10.3390/ijms24076391), 2023-03-28

## checkCIF/PLATON report

Structure factors have been supplied for datablock(s) I

THIS REPORT IS FOR GUIDANCE ONLY. IF USED AS PART OF A REVIEW PROCEDURE FOR PUBLICATION, IT SHOULD NOT REPLACE THE EXPERTISE OF AN EXPERIENCED CRYSTALLOGRAPHIC REFEREE.

No syntax errors found.      CIF dictionary      Interpreting this report

### Datablock: I

---

Bond precision:      C-C = 0.0087 Å      Wavelength=0.71073

Cell:                      a=18.1059(8)                      b=18.6900(8)                      c=19.5380(8)  
                              alpha=79.916(1)                      beta=66.223(2)                      gamma=83.277(2)

Temperature:      295 K

|                        | Calculated                                                           | Reported                              |
|------------------------|----------------------------------------------------------------------|---------------------------------------|
| Volume                 | 5949.1(4)                                                            | 5949.1(4)                             |
| Space group            | P -1                                                                 | P -1                                  |
| Hall group             | -P 1                                                                 | ?                                     |
| Moiety formula         | C99 H75 Cl12 Fe3 N9 O13,<br>0.167(C10 H10 N2), 0.667(C5<br>H5 N), Cl | C104.00 H80.00 Cl13 Fe3<br>N10.00 O13 |
| Sum formula            | C104 H80 Cl13 Fe3 N10 O13                                            | C104.00 H80.00 Cl13 Fe3<br>N10.00 O13 |
| Mr                     | 2306.18                                                              | 2306.27                               |
| Dx, g cm <sup>-3</sup> | 1.287                                                                | 1.287                                 |
| Z                      | 2                                                                    | 2                                     |
| Mu (mm <sup>-1</sup> ) | 0.711                                                                | 0.711                                 |
| F000                   | 2354.0                                                               | 2354.0                                |
| F000'                  | 2360.69                                                              |                                       |
| h, k, lmax             | 21, 22, 23                                                           | 21, 22, 23                            |
| Nref                   | 22111                                                                | 21983                                 |
| Tmin, Tmax             | 0.865, 0.892                                                         | 0.890, 0.890                          |
| Tmin'                  | 0.837                                                                |                                       |

Correction method= # Reported T Limits: Tmin=0.890 Tmax=0.890  
AbsCorr = NUMERICAL

Data completeness= 0.994

Theta(max)= 25.476

R(reflections)= 0.0483( 13266)

wR2(reflections)=  
0.1309( 13266)

S = 1.000

Npar= 1321

The following ALERTS were generated. Each ALERT has the format

**test-name\_ALERT\_alert-type\_alert-level.**

Click on the hyperlinks for more details of the test.

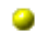

### Alert level C

|                   |                                                 |              |
|-------------------|-------------------------------------------------|--------------|
| PLAT042_ALERT_1_C | Calc. and Reported MoietyFormula Strings Differ | Please Check |
| PLAT341_ALERT_3_C | Low Bond Precision on C-C Bonds .....           | 0.0087 Ang.  |
| PLAT420_ALERT_2_C | D-H Bond Without Acceptor N4 --H41 .            | Please Check |
| PLAT911_ALERT_3_C | Missing FCF Refl Between Thmin & Sth/L= 0.600   | 84 Report    |

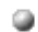

### Alert level G

|                   |                                                  |        |        |
|-------------------|--------------------------------------------------|--------|--------|
| PLAT002_ALERT_2_G | Number of Distance or Angle Restraints on AtSite | 18     | Note   |
| PLAT003_ALERT_2_G | Number of Uiso or Uij Restrained non-H Atoms ... | 8      | Report |
| PLAT007_ALERT_5_G | Number of Unrefined Donor-H Atoms .....          | 6      | Report |
| PLAT300_ALERT_4_G | Atom Site Occupancy of N12 Constrained at        | 0.3333 | Check  |
| PLAT300_ALERT_4_G | Atom Site Occupancy of C110 Constrained at       | 0.3333 | Check  |
| PLAT300_ALERT_4_G | Atom Site Occupancy of C111 Constrained at       | 0.3333 | Check  |
| PLAT300_ALERT_4_G | Atom Site Occupancy of C112 Constrained at       | 0.3333 | Check  |
| PLAT300_ALERT_4_G | Atom Site Occupancy of C113 Constrained at       | 0.3333 | Check  |
| PLAT300_ALERT_4_G | Atom Site Occupancy of C114 Constrained at       | 0.3333 | Check  |
| PLAT300_ALERT_4_G | Atom Site Occupancy of H1101 Constrained at      | 0.3333 | Check  |
| PLAT300_ALERT_4_G | Atom Site Occupancy of H1111 Constrained at      | 0.3333 | Check  |
| PLAT300_ALERT_4_G | Atom Site Occupancy of H1121 Constrained at      | 0.3333 | Check  |
| PLAT300_ALERT_4_G | Atom Site Occupancy of H1131 Constrained at      | 0.3333 | Check  |
| PLAT300_ALERT_4_G | Atom Site Occupancy of H1141 Constrained at      | 0.3333 | Check  |
| PLAT300_ALERT_4_G | Atom Site Occupancy of N10 Constrained at        | 0.3333 | Check  |
| PLAT300_ALERT_4_G | Atom Site Occupancy of C100 Constrained at       | 0.3333 | Check  |
| PLAT300_ALERT_4_G | Atom Site Occupancy of C101 Constrained at       | 0.3333 | Check  |
| PLAT300_ALERT_4_G | Atom Site Occupancy of C102 Constrained at       | 0.3333 | Check  |
| PLAT300_ALERT_4_G | Atom Site Occupancy of C103 Constrained at       | 0.3333 | Check  |
| PLAT300_ALERT_4_G | Atom Site Occupancy of C104 Constrained at       | 0.3333 | Check  |
| PLAT300_ALERT_4_G | Atom Site Occupancy of H1001 Constrained at      | 0.3333 | Check  |
| PLAT300_ALERT_4_G | Atom Site Occupancy of H1011 Constrained at      | 0.3333 | Check  |
| PLAT300_ALERT_4_G | Atom Site Occupancy of H1021 Constrained at      | 0.3333 | Check  |
| PLAT300_ALERT_4_G | Atom Site Occupancy of H1031 Constrained at      | 0.3333 | Check  |
| PLAT300_ALERT_4_G | Atom Site Occupancy of H1041 Constrained at      | 0.3333 | Check  |
| PLAT300_ALERT_4_G | Atom Site Occupancy of N11 Constrained at        | 0.3333 | Check  |
| PLAT300_ALERT_4_G | Atom Site Occupancy of C105 Constrained at       | 0.3333 | Check  |
| PLAT300_ALERT_4_G | Atom Site Occupancy of C106 Constrained at       | 0.3333 | Check  |
| PLAT300_ALERT_4_G | Atom Site Occupancy of C107 Constrained at       | 0.3333 | Check  |
| PLAT300_ALERT_4_G | Atom Site Occupancy of C108 Constrained at       | 0.3333 | Check  |
| PLAT300_ALERT_4_G | Atom Site Occupancy of C109 Constrained at       | 0.3333 | Check  |
| PLAT300_ALERT_4_G | Atom Site Occupancy of H1051 Constrained at      | 0.3333 | Check  |
| PLAT300_ALERT_4_G | Atom Site Occupancy of H1061 Constrained at      | 0.3333 | Check  |
| PLAT300_ALERT_4_G | Atom Site Occupancy of H1071 Constrained at      | 0.3333 | Check  |
| PLAT300_ALERT_4_G | Atom Site Occupancy of H1081 Constrained at      | 0.3333 | Check  |
| PLAT300_ALERT_4_G | Atom Site Occupancy of H1091 Constrained at      | 0.3333 | Check  |
| PLAT300_ALERT_4_G | Atom Site Occupancy of C113 Constrained at       | 0.25   | Check  |
| PLAT300_ALERT_4_G | Atom Site Occupancy of C114 Constrained at       | 0.25   | Check  |

|                   |                                                  |                |       |              |
|-------------------|--------------------------------------------------|----------------|-------|--------------|
| PLAT300_ALERT_4_G | Atom Site Occupancy of Cl15                      | Constrained at | 0.125 | Check        |
| PLAT300_ALERT_4_G | Atom Site Occupancy of Cl16                      | Constrained at | 0.125 | Check        |
| PLAT300_ALERT_4_G | Atom Site Occupancy of Cl17                      | Constrained at | 0.125 | Check        |
| PLAT300_ALERT_4_G | Atom Site Occupancy of Cl18                      | Constrained at | 0.125 | Check        |
| PLAT302_ALERT_4_G | Anion/Solvent/Minor-Residue Disorder (Resd 2 )   |                | 100%  | Note         |
| PLAT302_ALERT_4_G | Anion/Solvent/Minor-Residue Disorder (Resd 3 )   |                | 100%  | Note         |
| PLAT302_ALERT_4_G | Anion/Solvent/Minor-Residue Disorder (Resd 4 )   |                | 100%  | Note         |
| PLAT302_ALERT_4_G | Anion/Solvent/Minor-Residue Disorder (Resd 5 )   |                | 100%  | Note         |
| PLAT302_ALERT_4_G | Anion/Solvent/Minor-Residue Disorder (Resd 6 )   |                | 100%  | Note         |
| PLAT302_ALERT_4_G | Anion/Solvent/Minor-Residue Disorder (Resd 7 )   |                | 100%  | Note         |
| PLAT302_ALERT_4_G | Anion/Solvent/Minor-Residue Disorder (Resd 8 )   |                | 100%  | Note         |
| PLAT302_ALERT_4_G | Anion/Solvent/Minor-Residue Disorder (Resd 9 )   |                | 100%  | Note         |
| PLAT302_ALERT_4_G | Anion/Solvent/Minor-Residue Disorder (Resd 10 )  |                | 100%  | Note         |
| PLAT304_ALERT_4_G | Non-Integer Number of Atoms in ..... (Resd 2 )   |                | 7.33  | Check        |
| PLAT304_ALERT_4_G | Non-Integer Number of Atoms in ..... (Resd 3 )   |                | 3.67  | Check        |
| PLAT304_ALERT_4_G | Non-Integer Number of Atoms in ..... (Resd 4 )   |                | 3.67  | Check        |
| PLAT304_ALERT_4_G | Non-Integer Number of Atoms in ..... (Resd 5 )   |                | 0.25  | Check        |
| PLAT304_ALERT_4_G | Non-Integer Number of Atoms in ..... (Resd 6 )   |                | 0.25  | Check        |
| PLAT304_ALERT_4_G | Non-Integer Number of Atoms in ..... (Resd 7 )   |                | 0.12  | Check        |
| PLAT304_ALERT_4_G | Non-Integer Number of Atoms in ..... (Resd 8 )   |                | 0.12  | Check        |
| PLAT304_ALERT_4_G | Non-Integer Number of Atoms in ..... (Resd 9 )   |                | 0.12  | Check        |
| PLAT304_ALERT_4_G | Non-Integer Number of Atoms in ..... (Resd 10 )  |                | 0.12  | Check        |
| PLAT434_ALERT_2_G | Short Inter HL..HL Contact Cl10 ..Cl10 .         |                | 3.38  | Ang.         |
|                   | 2-x,-y,1-z =                                     |                | 2_756 | Check        |
| PLAT720_ALERT_4_G | Number of Unusual/Non-Standard Labels .....      |                | 19    | Note         |
| PLAT769_ALERT_4_G | CIF Embedded explicitly supplied scattering data |                |       | Please Note  |
| PLAT794_ALERT_5_G | Tentative Bond Valency for Fe1 (III) .           |                | 3.02  | Info         |
| PLAT794_ALERT_5_G | Tentative Bond Valency for Fe2 (III) .           |                | 3.05  | Info         |
| PLAT794_ALERT_5_G | Tentative Bond Valency for Fe3 (III) .           |                | 3.00  | Info         |
| PLAT808_ALERT_5_G | No Parseable SHELXL Style Weighting Scheme Found |                |       | Please Check |
| PLAT860_ALERT_3_G | Number of Least-Squares Restraints .....         |                | 48    | Note         |
| PLAT882_ALERT_1_G | No Datum for _diffrn_reflns_av_unetI/netI .....  |                |       | Please Do !  |
| PLAT910_ALERT_3_G | Missing # of FCF Reflection(s) Below Theta(Min). |                | 1     | Note         |
| PLAT912_ALERT_4_G | Missing # of FCF Reflections Above STh/L= 0.600  |                | 113   | Note         |
| PLAT929_ALERT_5_G | No Weight Pars,Obs and Calc R1,wR2,S not Checked |                |       | ! Info       |
| PLAT960_ALERT_3_G | Number of Intensities with I < - 2*sig(I) ...    |                | 1     | Check        |

---

0 **ALERT level A** = Most likely a serious problem - resolve or explain  
 0 **ALERT level B** = A potentially serious problem, consider carefully  
 4 **ALERT level C** = Check. Ensure it is not caused by an omission or oversight  
 73 **ALERT level G** = General information/check it is not something unexpected

2 ALERT type 1 CIF construction/syntax error, inconsistent or missing data  
 4 ALERT type 2 Indicator that the structure model may be wrong or deficient  
 5 ALERT type 3 Indicator that the structure quality may be low  
 60 ALERT type 4 Improvement, methodology, query or suggestion  
 6 ALERT type 5 Informative message, check

---

It is advisable to attempt to resolve as many as possible of the alerts in all categories. Often the minor alerts point to easily fixed oversights, errors and omissions in your CIF or refinement strategy, so attention to these fine details can be worthwhile. In order to resolve some of the more serious problems it may be necessary to carry out additional measurements or structure refinements. However, the purpose of your study may justify the reported deviations and the more serious of these should normally be commented upon in the discussion or experimental section of a paper or in the "special\_details" fields of the CIF. checkCIF was carefully designed to identify outliers and unusual parameters, but every test has its limitations and alerts that are not important in a particular case may appear. Conversely, the absence of alerts does not guarantee there are no aspects of the results needing attention. It is up to the individual to critically assess their own results and, if necessary, seek expert advice.

### **Publication of your CIF in IUCr journals**

A basic structural check has been run on your CIF. These basic checks will be run on all CIFs submitted for publication in IUCr journals (*Acta Crystallographica*, *Journal of Applied Crystallography*, *Journal of Synchrotron Radiation*); however, if you intend to submit to *Acta Crystallographica Section C* or *E* or *IUCrData*, you should make sure that full publication checks are run on the final version of your CIF prior to submission.

### **Publication of your CIF in other journals**

Please refer to the *Notes for Authors* of the relevant journal for any special instructions relating to CIF submission.

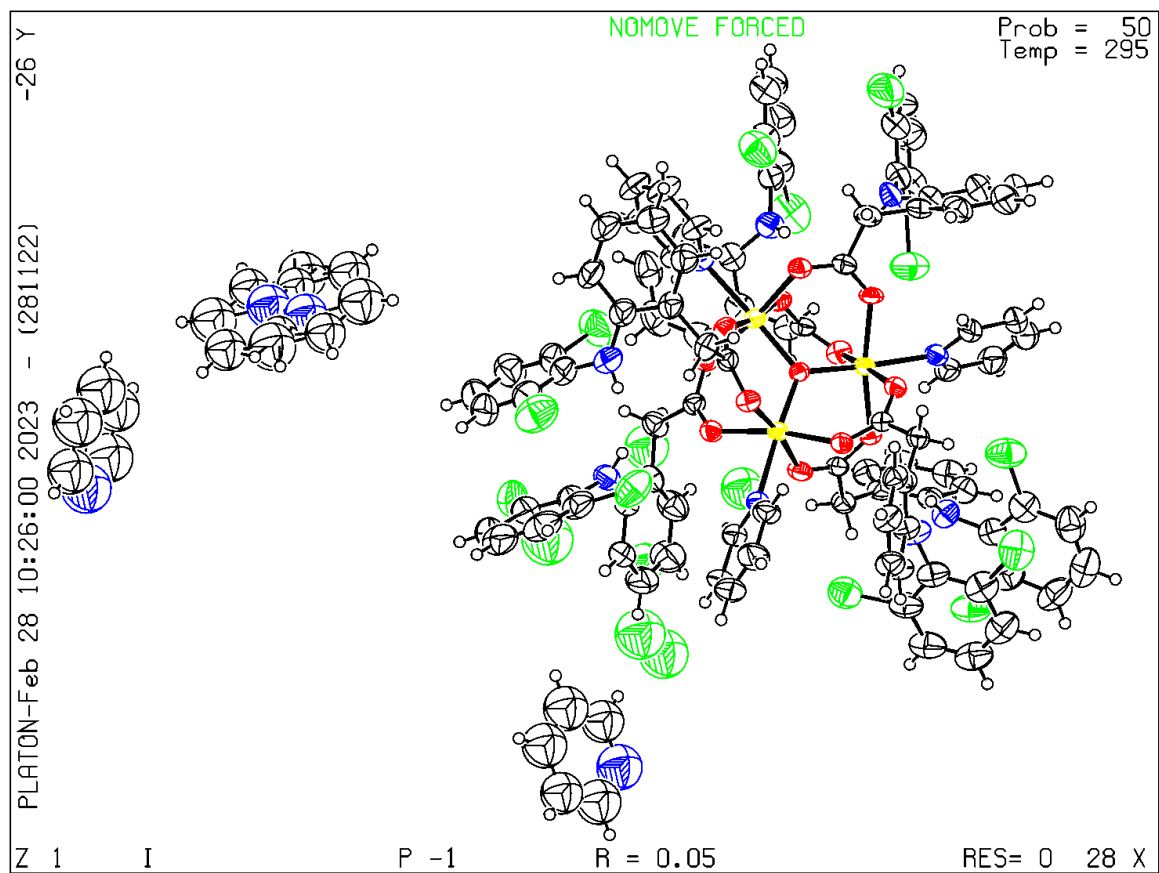

Supplement: s1 [file s1]
