# Supplementary material for: Iron(III) Complexes with Non-Steroidal Anti-Inflammatory Drugs: Structure, Antioxidant and Anticholinergic Activity, and Interaction with Biomolecules
Source: MDPI journal article supplement (doi:10.3390/ijms24076391), 2023-03-28
Supplement: s1 [file s1]

# **Iron(III) Complexes with Non-Steroidal Anti-Inflammatory Drugs: Structure, Antioxidant and Anticholinergic Activity, and Interaction with Biomolecules**

**Filitsa Dimiza <sup>1</sup>, Amalia Barmpa <sup>1</sup>, Antonios Chronakis <sup>2</sup>, Antonios G. Hatzidimitriou <sup>1</sup>, Yiannis Sanakis <sup>3</sup>, Athanasios N. Papadopoulos <sup>2</sup> and George Psomas <sup>1,\*</sup>**

<sup>1</sup> Department of General and Inorganic Chemistry, Faculty of Chemistry, Aristotle University of Thessaloniki, GR-54124 Thessaloniki, Greece

<sup>2</sup> Department of Nutritional Sciences and Dietetics, International Hellenic University, GR-57400 Thessaloniki, Greece

<sup>3</sup> Institute of Nanoscience and Nanotechnology, National Centre of Scientific Research "Demokritos", GR-15310 Agia Paraskevi, Greece

\* Correspondence: [gepsomas@chem.auth.gr](mailto:gepsomas@chem.auth.gr)

## **Supplementary Materials**

---

\* Corresponding author's e-mail: [gepsomas@chem.auth.gr](mailto:gepsomas@chem.auth.gr)

## INDEX

| Content                                                                                                                                   | Page |
|-------------------------------------------------------------------------------------------------------------------------------------------|------|
| <b>Table S1.</b> Crystal determination data for complexes <b>1-3</b>                                                                      | 3    |
| <b>Table S2.</b> Selected bond lengths and bond angles for complex <b>1</b> .                                                             | 4    |
| <b>Table S3.</b> Selected bond lengths and bond angles for complex <b>2</b> .                                                             | 5    |
| <b>Table S4.</b> H-bonding interactions in complexes <b>2</b> and <b>3</b> .                                                              | 6    |
| <b>Table S5.</b> Selected bond lengths and bond angles for complex <b>3</b> .                                                             | 7    |
| <b>Figure S1.</b> IR spectra (KBr pellet) of complexes <b>1-3</b> .                                                                       | 8    |
| <b>Figure S2.</b> Stern-Volmer quenching plots of BSA for complexes <b>1-3</b> .                                                          | 9    |
| <b>Figure S3.</b> Stern-Volmer quenching plots of HSA for complexes <b>1-3</b> .                                                          | 9    |
| <b>Figure S4.</b> Scatchard plots of BSA for complexes <b>1-3</b> .                                                                       | 10   |
| <b>Figure S5.</b> Scatchard plots of HSA for complexes <b>1-3</b> .                                                                       | 10   |
| <b>Figure S6.</b> UV-vis spectra of a DMSO solution of complexes <b>1</b> and <b>2</b> , in the presence of increasing amounts of CT DNA. | 11   |
| <b>Figure S7.</b> Plots of $[DNA]/(\epsilon_A - \epsilon_t)$ <i>versus</i> $[DNA]$ for complexes <b>1-3</b> .                             | 11   |
| <b>Figure S8.</b> Stern-Volmer quenching plots of EB-DNA fluorescence for complexes <b>1-3</b> .                                          | 12   |

**Table S1.** Crystal determination data for complexes  $[\text{Fe}_2(\text{difl})_4(\text{phen})_2(\text{MeO})_2] \cdot \text{H}_2\text{O}$ , (**1**),  $[\text{Fe}_3\text{O}(\text{dicl})_6(\text{py})_3]\text{Cl} \cdot \text{py}$ , (**2**) and  $[\text{Fe}_3\text{O}(\text{dicl})_6(\text{MeOH})_3][\text{FeCl}_4] \cdot \text{Hdicl} \cdot 1.5\text{MeOH} \cdot \text{H}_2\text{O}$ , (**3**).

|                                                         | Complex 1                                                                                 | Complex 2                                                                                                                  | Complex 3                                                                                                                                                                                                    |
|---------------------------------------------------------|-------------------------------------------------------------------------------------------|----------------------------------------------------------------------------------------------------------------------------|--------------------------------------------------------------------------------------------------------------------------------------------------------------------------------------------------------------|
| Crystal data                                            |                                                                                           |                                                                                                                            |                                                                                                                                                                                                              |
| Chemical Formula sum                                    | $\text{C}_{52}\text{H}_{36}\text{F}_4\text{Fe}_2\text{N}_4\text{O}_9$                     | $\text{C}_{104.00}\text{H}_{80.00}\text{Cl}_{13}\text{Fe}_3\text{N}_{10.00}\text{O}_{13}$                                  | $\text{C}_{102.50}\text{H}_{91}\text{Cl}_{18}\text{Fe}_4\text{N}_7\text{O}_{20.50}$                                                                                                                          |
| Chemical Formula moiety                                 | $\text{C}_{52}\text{H}_{34}\text{F}_4\text{Fe}_2\text{N}_4\text{O}_8, \text{H}_2\text{O}$ | $\text{C}_{99}\text{H}_{75}\text{Cl}_{12}\text{Fe}_3\text{N}_9\text{O}_{13},$<br>$\text{C}_5\text{H}_5\text{N}, \text{Cl}$ | $\text{C}_{87}\text{H}_{72}\text{Cl}_{12}\text{Fe}_3\text{N}_6\text{O}_{16},$<br>$\text{C}_{14}\text{H}_{11}\text{Cl}_2\text{NO}_2, \text{Cl}_4\text{Fe},$<br>$1.5(\text{CH}_4\text{O}), \text{H}_2\text{O}$ |
| $M_r$                                                   | 1048.56                                                                                   | 2287.00                                                                                                                    | 2610.43                                                                                                                                                                                                      |
| Crystal system                                          | Triclinic                                                                                 | Triclinic                                                                                                                  | Triclinic                                                                                                                                                                                                    |
| Space group                                             | $P-1$                                                                                     | $P-1$                                                                                                                      | $P-1$                                                                                                                                                                                                        |
| Temperature (K)                                         | 295                                                                                       | 295                                                                                                                        | 295                                                                                                                                                                                                          |
| $a$ (Å)                                                 | 7.0270 (16)                                                                               | 18.1059 (8)                                                                                                                | 15.8519 (11)                                                                                                                                                                                                 |
| $b$ (Å)                                                 | 11.719 (3)                                                                                | 18.6900 (8)                                                                                                                | 18.1237 (11),                                                                                                                                                                                                |
| $c$ (Å)                                                 | 15.665 (4)                                                                                | 19.5380 (8)                                                                                                                | 22.7624 (16)                                                                                                                                                                                                 |
| $\alpha$ (°)                                            | 77.863 (13)                                                                               | 79.916 (1)                                                                                                                 | 83.530 (3),                                                                                                                                                                                                  |
| $\beta$ (°)                                             | 88.928 (13)                                                                               | 66.223 (2)                                                                                                                 | 84.653 (4),                                                                                                                                                                                                  |
| $\gamma$ (°)                                            | 72.872 (12)                                                                               | 83.277 (2)                                                                                                                 | 86.714 (4)                                                                                                                                                                                                   |
| $V$ (Å <sup>3</sup> )                                   | 1204.0 (5)                                                                                | 5949.1 (4)                                                                                                                 | 6462.4 (8)                                                                                                                                                                                                   |
| $Z$                                                     | 1                                                                                         | 2                                                                                                                          | 2                                                                                                                                                                                                            |
| Radiation type                                          | MoK $\alpha$                                                                              | MoK $\alpha$                                                                                                               | MoK $\alpha$                                                                                                                                                                                                 |
| ( $\mu$ ) mm <sup>-1</sup>                              | 0.68                                                                                      | 0.71                                                                                                                       | 0.87                                                                                                                                                                                                         |
| Crystal size, mm                                        | $0.32 \times 0.14 \times 0.11$                                                            | $0.25 \times 0.17 \times 0.16$                                                                                             | $0.27 \times 0.19 \times 0.15$                                                                                                                                                                               |
| Data collection                                         |                                                                                           |                                                                                                                            |                                                                                                                                                                                                              |
| Diffractometer                                          | Bruker Kappa Apex2                                                                        |                                                                                                                            |                                                                                                                                                                                                              |
| Absorption correction                                   | Numerical / Analytical Absorption (De Meulenaer & Tompa, 1965)                            |                                                                                                                            |                                                                                                                                                                                                              |
| $T_{\min}, T_{\max}$                                    | 0.91, 0.93                                                                                | 0.89, 0.89                                                                                                                 | 0.87, 0.88                                                                                                                                                                                                   |
| No. of measured reflections                             | 27894                                                                                     | 82916                                                                                                                      | 81474                                                                                                                                                                                                        |
| No. of independent reflections                          | 4635                                                                                      | 21983                                                                                                                      | 24332                                                                                                                                                                                                        |
| No. of observed [ $I > 2.0\sigma(I)$ ] reflections      | 3951                                                                                      | 13266                                                                                                                      | 16440                                                                                                                                                                                                        |
| $R_{\text{int}}$                                        | 0.026                                                                                     | 0.037                                                                                                                      | 0.026                                                                                                                                                                                                        |
| $(\sin \theta / \lambda)_{\max}$ (Å <sup>-1</sup> )     | 0.616                                                                                     | 0.605                                                                                                                      | 0.617                                                                                                                                                                                                        |
| Refinement                                              |                                                                                           |                                                                                                                            |                                                                                                                                                                                                              |
| $R[F^2 > 2\sigma(F^2)], wR(F^2), S$                     | 0.048, 0.076, 1.00                                                                        | 0.048, 0.110, 1.00                                                                                                         | 0.052, 0.077, 1.00                                                                                                                                                                                           |
| No. of reflections                                      | 3951                                                                                      | 13266                                                                                                                      | 16440                                                                                                                                                                                                        |
| No. of parameters                                       | 370                                                                                       | 1321                                                                                                                       | 1543                                                                                                                                                                                                         |
| No. of restraints                                       | -                                                                                         | 48                                                                                                                         | 3                                                                                                                                                                                                            |
| H-atom treatment                                        |                                                                                           | H-atom parameters constrained                                                                                              |                                                                                                                                                                                                              |
| $\Delta Q_{\max}, \Delta Q_{\min}$ (e Å <sup>-3</sup> ) | 0.33, -0.32                                                                               | 0.47, -0.45                                                                                                                | 0.69, -0.45                                                                                                                                                                                                  |

**Table S2.** Selected bond lengths (Å) and bond angles (°) for complex **1**.

| <b>Bond</b>                   | <b>Length (Å)</b> | <b>Bond</b>                    | <b>Length (Å)</b> |
|-------------------------------|-------------------|--------------------------------|-------------------|
| Fe(1)-O(4 <sup>i</sup> )      | 1.9984(19)        | Fe(1)-N(1)                     | 2.200(2)          |
| Fe(1)-O(1)                    | 1.920(2)          | Fe(1)-N(2)                     | 2.191(3)          |
| Fe(1)-O(4)                    | 1.9726(19)        | Fe(1)-O(3)                     | 1.928(2)          |
| Fe(1)... Fe(1 <sup>i</sup> )  | 3.119             |                                |                   |
| O(1)—C(1)                     | 1.273 (4)         | O(3)—C(3)                      | 1.295 (4)         |
| O(2)—C(1)                     | 1.264 (4)         | O(4)—C(26)                     | 1.405 (3)         |
| <b>Bonds</b>                  | <b>Angle (°)</b>  | <b>Bonds</b>                   | <b>Angle (°)</b>  |
| O(4 <sup>i</sup> )-Fe(1)-N(1) | 94.36 (9)         | O(1)-Fe(1)-O(3)                | 89.66 (9)         |
| O(4 <sup>i</sup> )-Fe(1)-N(2) | 89.39 (9)         | O(4 <sup>i</sup> )-Fe(1)-O(4)  | 76.46 (9)         |
| N(1)-Fe(1)-N(2)               | 75.03 (9)         | N(1)-Fe(1)-O(4)                | 164.56 (9)        |
| O(4 <sup>i</sup> )-Fe(1)-O(1) | 172.52 (8)        | N(2)-Fe(1)-O(4)                | 92.27 (9)         |
| N(1)-Fe(1)-O(1)               | 92.17 (9)         | O(1)-Fe(1)-O(4)                | 96.36 (8)         |
| N(2)-Fe(1)-O(1)               | 88.77 (9)         | O(3)-Fe(1)-O(4)                | 104.73 (9)        |
| O(4 <sup>i</sup> )-Fe(1)-O(3) | 94.19 (9)         | N(1)-Fe(1)-O(3)                | 88.11 (9)         |
| N(2)-Fe(1)-O(3)               | 163.00 (8)        |                                |                   |
| Fe(1)-O(3)-C(3)               | 127.4 (2)         | Fe(1 <sup>i</sup> )-O(4)-Fe(1) | 103.54 (9)        |

Symmetry code : (i) -x+1, -y+1, -z+1.

**Table S3.** Selected bond lengths (Å) and bond angles (°) for complex **2**.

| <b>Bond</b> | <b>Length (Å)</b> | <b>Bond</b> | <b>Length (Å)</b> | <b>Bond</b> | <b>Length (Å)</b> |
|-------------|-------------------|-------------|-------------------|-------------|-------------------|
| Fe1—O1      | 2.019 (2)         | Fe2—O2      | 2.012 (3)         | Fe3—O4      | 2.039 (3)         |
| Fe1—O3      | 2.018 (3)         | Fe2—O6      | 2.017 (3)         | Fe3—O5      | 2.021 (3)         |
| Fe1—O7      | 2.028 (3)         | Fe2—O8      | 2.039 (3)         | Fe3—O10     | 2.041 (3)         |
| Fe1—O9      | 2.029 (2)         | Fe2—O11     | 1.995 (3)         | Fe3—O12     | 2.020 (3)         |
| Fe1—O13     | 1.910 (2)         | Fe2—O13     | 1.922 (2)         | Fe3—O13     | 1.890 (2)         |
| Fe1—N1      | 2.157 (3)         | Fe2—N2      | 2.149 (3)         | Fe3—N3      | 2.179 (3)         |
| Fe1...Fe2   | 3.311             | Fe2...Fe3   | 3.302             | Fe1...Fe3   | 3.296             |

  

| <b>Bonds</b> | <b>Angle (°)</b> | <b>Bonds</b> | <b>Angle (°)</b> | <b>Bonds</b> | <b>Angle (°)</b> |
|--------------|------------------|--------------|------------------|--------------|------------------|
| O1—Fe1—O3    | 90.83 (11)       | O2—Fe2—O6    | 170.94 (11)      | O4—Fe3—O5    | 170.17 (10)      |
| O1—Fe1—O7    | 95.00 (12)       | O2—Fe2—O8    | 89.49 (11)       | O4—Fe3—O10   | 92.54 (11)       |
| O3—Fe1—O7    | 171.83 (11)      | O6—Fe2—O8    | 84.62 (11)       | O5—Fe3—O10   | 85.99 (11)       |
| O1—Fe1—O9    | 168.85 (11)      | O2—Fe2—O11   | 89.98 (12)       | O4—Fe3—O12   | 90.80 (11)       |
| O3—Fe1—O9    | 88.68 (11)       | O6—Fe2—O11   | 94.98 (12)       | O5—Fe3—O12   | 89.24 (11)       |
| O7—Fe1—O9    | 84.50 (11)       | O8—Fe2—O11   | 172.72 (11)      | O10—Fe3—O12  | 170.68 (11)      |
| O1—Fe1—O13   | 94.51 (11)       | O2—Fe2—O13   | 95.22 (11)       | O4—Fe3—O13   | 93.68 (10)       |
| O3—Fe1—O13   | 93.93 (11)       | O6—Fe2—O13   | 92.08 (11)       | O5—Fe3—O13   | 96.09 (11)       |
| O7—Fe1—O13   | 91.33 (11)       | O8—Fe2—O13   | 94.08 (11)       | O10—Fe3—O13  | 92.66 (11)       |
| O9—Fe1—O13   | 96.64 (10)       | O11—Fe2—O13  | 93.20 (11)       | O12—Fe3—O13  | 95.80 (11)       |
| O1—Fe1—N1    | 82.49 (12)       | O2—Fe2—N2    | 86.59 (13)       | O4—Fe3—N3    | 83.76 (12)       |
| O3—Fe1—N1    | 88.36 (13)       | O6—Fe2—N2    | 86.26 (12)       | O5—Fe3—N3    | 86.43 (12)       |
| O7—Fe1—N1    | 86.73 (13)       | O8—Fe2—N2    | 87.36 (12)       | O10—Fe3—N3   | 84.99 (12)       |
| O9—Fe1—N1    | 86.36 (11)       | O11—Fe2—N2   | 85.37 (12)       | O12—Fe3—N3   | 86.73 (12)       |
| O13—Fe1—N1   | 176.26 (12)      | O13—Fe2—N2   | 177.70 (12)      | O13—Fe3—N3   | 176.44 (12)      |
| Fe2—O13—Fe1  | 119.54 (12)      | Fe2—O13—Fe3  | 120.05 (13)      | Fe1—O13—Fe3  | 120.29 (13)      |

**Table S4.** H-bonding interactions in complexes **2** and **3**.

| <i>D</i> —H... <i>A</i> | <i>D</i> —H (Å) | H... <i>A</i> (Å) | <i>D</i> ... <i>A</i> (Å) | <i>D</i> —H... <i>A</i> (°) |
|-------------------------|-----------------|-------------------|---------------------------|-----------------------------|
| <b>2</b>                |                 |                   |                           |                             |
| N6—H61...O5             | 0.84            | 2.56              | 3.143 (5)                 | 127                         |
| N7—H71...O8             | 0.84            | 2.38              | 3.005 (5)                 | 132                         |
| N8—H81...O9             | 0.85            | 2.46              | 3.097 (5)                 | 133                         |
| N5—H1135...O4           | 0.84            | 2.54              | 3.123 (5)                 | 127                         |
| <b>3</b>                |                 |                   |                           |                             |
| N7—H71...O20            | 0.87            | 2.42              | 2.998 (8)                 | 124                         |
| O8—H81...O20            | 0.93            | 2.35              | 3.189 (8)                 | 149                         |
| O9—H91...O22            | 0.85            | 1.95              | 2.645 (8)                 | 139                         |
| O17—H171...O10          | 0.73            | 1.97              | 2.603 (8)                 | 146                         |
| N8—H1184...O21          | 0.87            | 2.34              | 3.076 (8)                 | 142                         |

**Table S5.** Selected bond lengths (Å) and bond angles (°) for complex 3.

| Bond      | Length (Å)  | Bond      | Length (Å)  | Bond      | Length (Å) |
|-----------|-------------|-----------|-------------|-----------|------------|
| Fe1—O1    | 1.863 (2)   | Fe2—O1    | 1.926 (2)   | Fe3—O1    | 1.905 (2)  |
| Fe1—O2    | 2.019 (2)   | Fe2—O3    | 2.060 (2)   | Fe3—O5    | 2.024 (2)  |
| Fe1—O4    | 2.013 (2)   | Fe2—O7    | 2.050 (3)   | Fe3—O6    | 2.037 (2)  |
| Fe1—O8    | 2.057 (2)   | Fe2—O9    | 2.078 (2)   | Fe3—O10   | 2.064 (2)  |
| Fe1—O11   | 2.002 (2)   | Fe2—O12   | 2.026 (2)   | Fe3—O14   | 2.029 (2)  |
| Fe1—O13   | 2.051 (2)   | Fe2—O16   | 2.041 (2)   | Fe3—O15   | 2.042 (2)  |
| Fe4—Cl1   | 2.1748 (11) | Fe4—Cl2   | 2.1483 (12) |           |            |
| Fe4—Cl4   | 2.1857 (12) | Fe4—Cl3   | 2.1722 (11) |           |            |
| Fe1...Fe2 | 3.266       | Fe2...Fe3 | 3.310       | Fe1...Fe3 | 3.287      |

  

| Bonds       | Angle (°)  | Bonds       | Angle (°)   | Bonds       | Angle (°)   |
|-------------|------------|-------------|-------------|-------------|-------------|
| O1—Fe1—O2   | 93.31 (10) | O1—Fe2—O3   | 92.29 (10)  | O1—Fe3—O5   | 94.93 (9)   |
| O1—Fe1—O4   | 94.99 (9)  | O1—Fe2—O7   | 93.19 (10)  | O1—Fe3—O6   | 93.69 (9)   |
| O2—Fe1—O4   | 91.69 (9)  | O3—Fe2—O7   | 173.37 (10) | O5—Fe3—O6   | 171.38 (9)  |
| O1—Fe1—O8   | 177.10 (9) | O1—Fe2—O9   | 179.15 (9)  | O1—Fe3—O10  | 176.72 (10) |
| O2—Fe1—O8   | 86.04 (9)  | O3—Fe2—O9   | 87.49 (10)  | O5—Fe3—O10  | 88.34 (9)   |
| O4—Fe1—O8   | 82.21 (8)  | O7—Fe2—O9   | 87.08 (10)  | O6—Fe3—O10  | 83.04 (9)   |
| O1—Fe1—O11  | 97.53 (9)  | O1—Fe2—O12  | 93.49 (9)   | O1—Fe3—O14  | 92.94 (9)   |
| O2—Fe1—O11  | 89.47 (10) | O3—Fe2—O12  | 93.43 (10)  | O5—Fe3—O14  | 92.88 (9)   |
| O4—Fe1—O11  | 167.34 (9) | O7—Fe2—O12  | 89.96 (9)   | O6—Fe3—O14  | 86.82 (9)   |
| O8—Fe1—O11  | 85.29 (9)  | O9—Fe2—O12  | 85.70 (9)   | O10—Fe3—O14 | 86.55 (9)   |
| O1—Fe1—O13  | 91.03 (9)  | O1—Fe2—O16  | 94.74 (9)   | O1—Fe3—O15  | 94.73 (10)  |
| O2—Fe1—O13  | 173.90 (9) | O3—Fe2—O16  | 86.97 (9)   | O5—Fe3—O15  | 86.51 (9)   |
| O4—Fe1—O13  | 92.20 (9)  | O7—Fe2—O16  | 88.86 (9)   | O6—Fe3—O15  | 92.64 (9)   |
| O8—Fe1—O13  | 89.84 (9)  | O9—Fe2—O16  | 86.07 (9)   | O10—Fe3—O15 | 85.79 (9)   |
| O11—Fe1—O13 | 85.71 (9)  | O12—Fe2—O16 | 171.74 (10) | O14—Fe3—O15 | 172.32 (9)  |
| Cl1—Fe4—Cl2 | 109.79 (5) | Cl1—Fe4—Cl4 | 113.78 (5)  | Cl2—Fe4—Cl4 | 108.04 (4)  |
| Cl1—Fe4—Cl3 | 107.38 (4) | Cl2—Fe4—Cl3 | 111.61 (5)  | Cl3—Fe4—Cl4 | 106.25 (5)  |
| Fe2—O1—Fe3  | 119.54(11) | Fe2—O1—Fe1  | 119.04(11)  | Fe3—O1—Fe1  | 121.40 (12) |

1

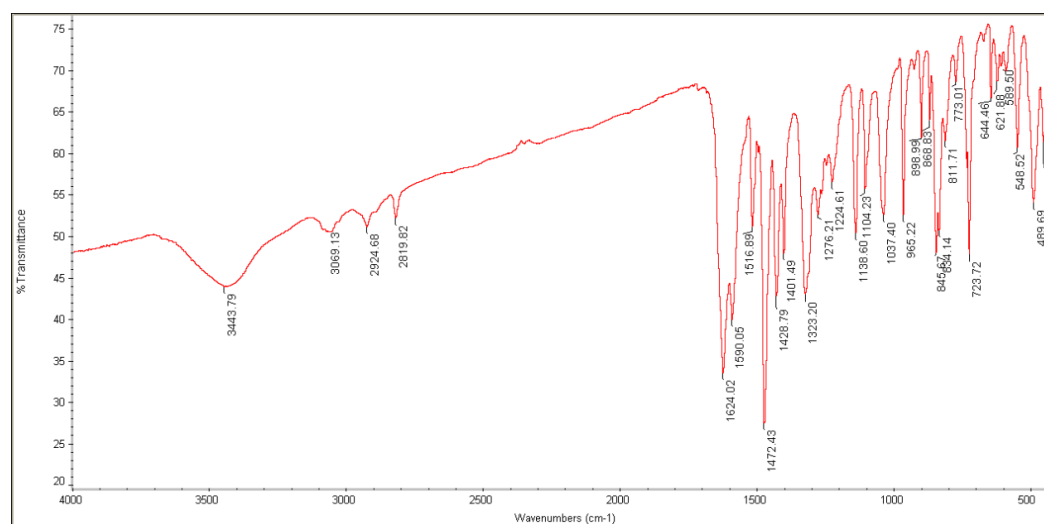

2

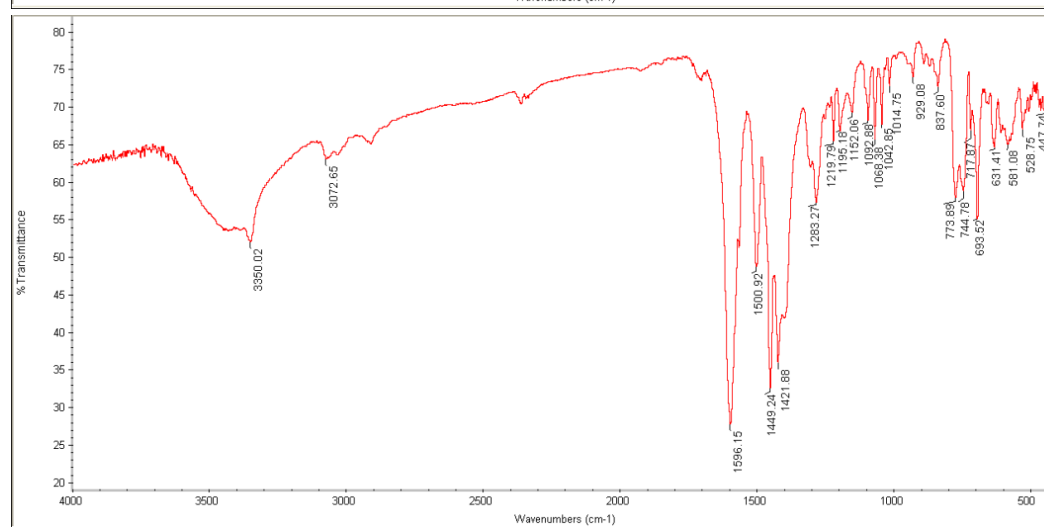

3

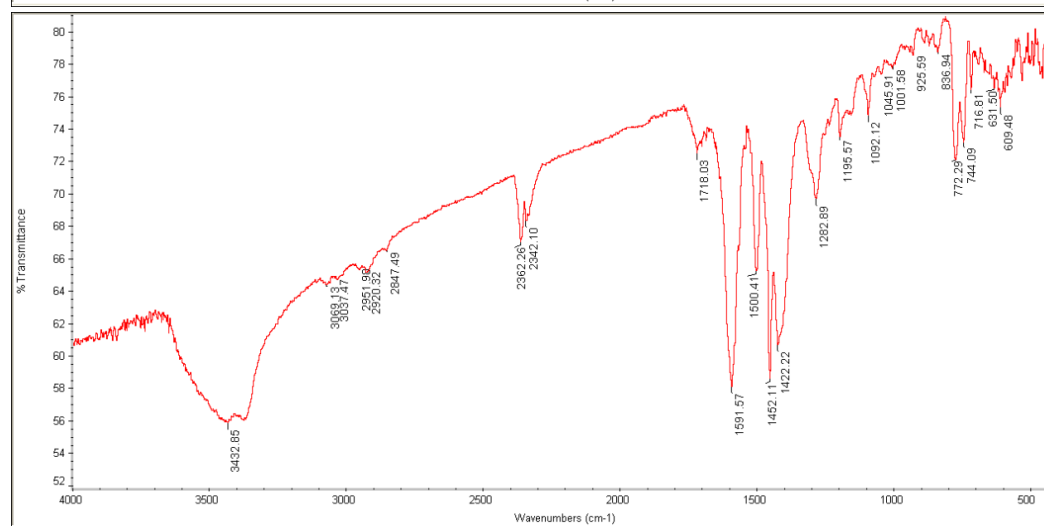

Figure S1. IR spectra (KBr pellet) of complexes 1-3.



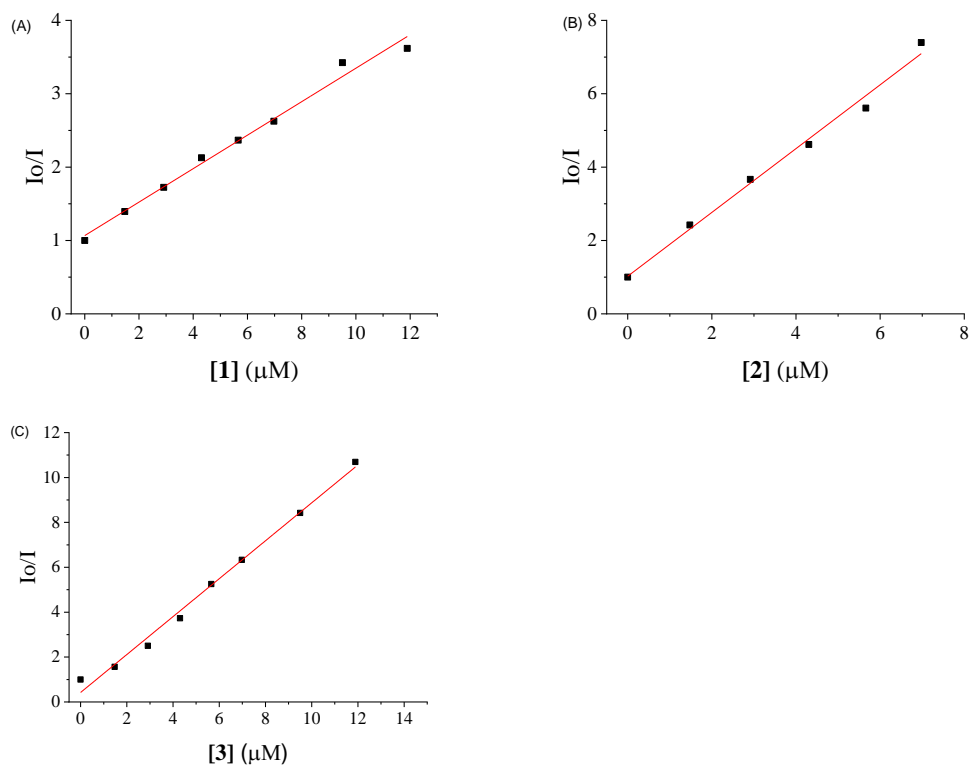

**Figure S2.** Stern-Volmer quenching plots of BSA for complexes 1-3.

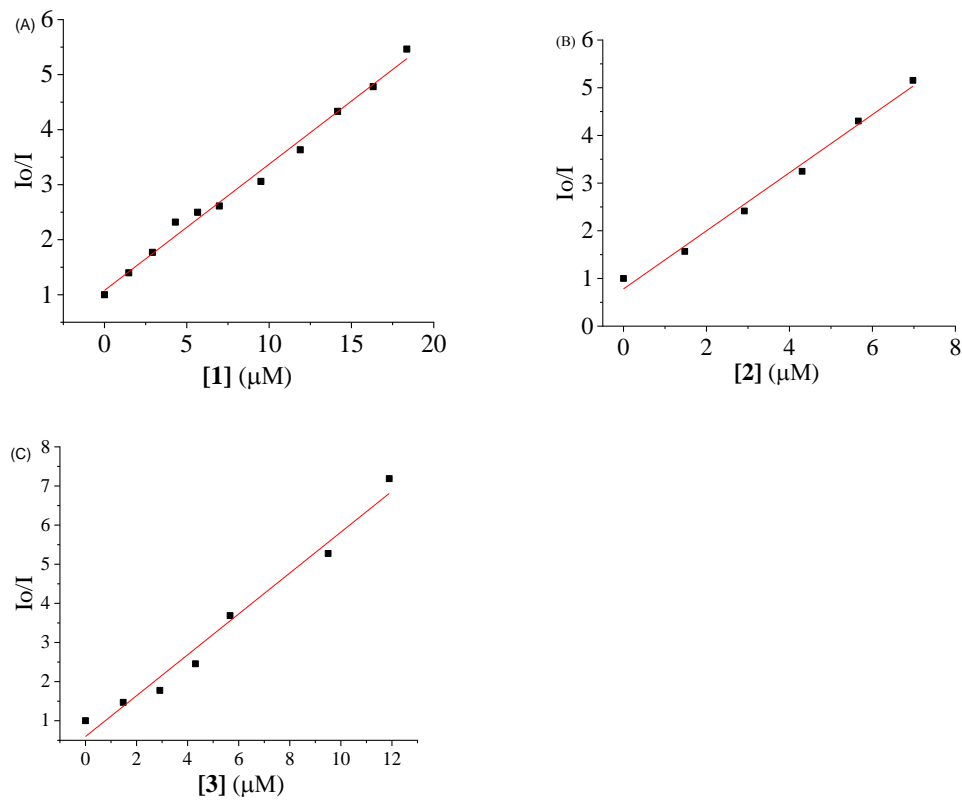

**Figure S3.** Stern-Volmer quenching plots of HSA for complexes 1-3.

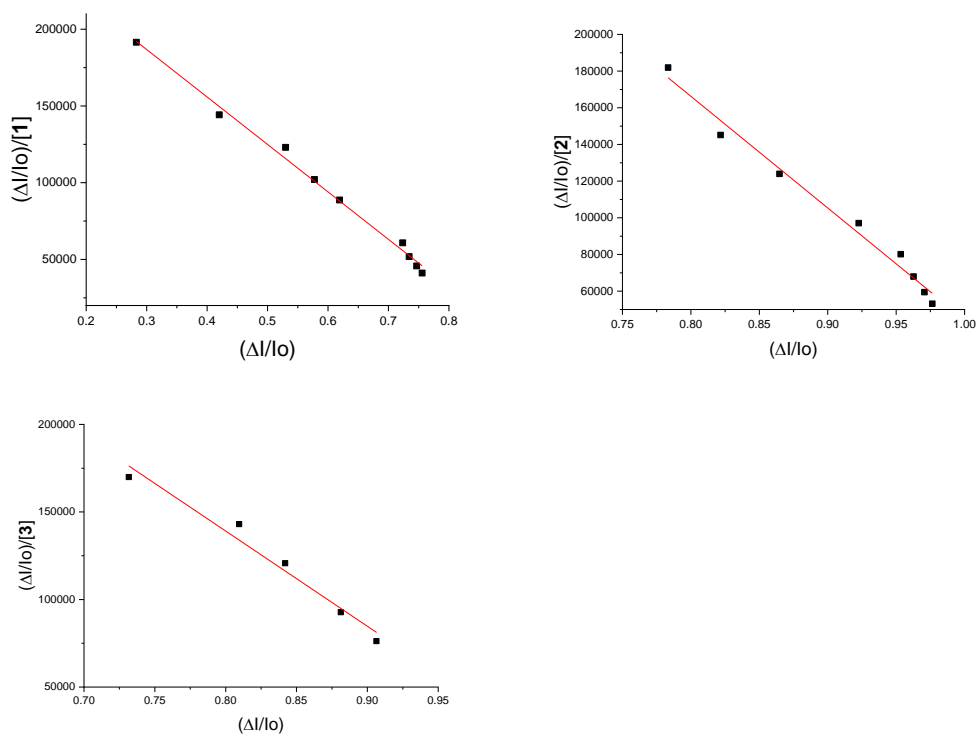

**Figure S4.** Scatchard plots of BSA for complexes 1-3.

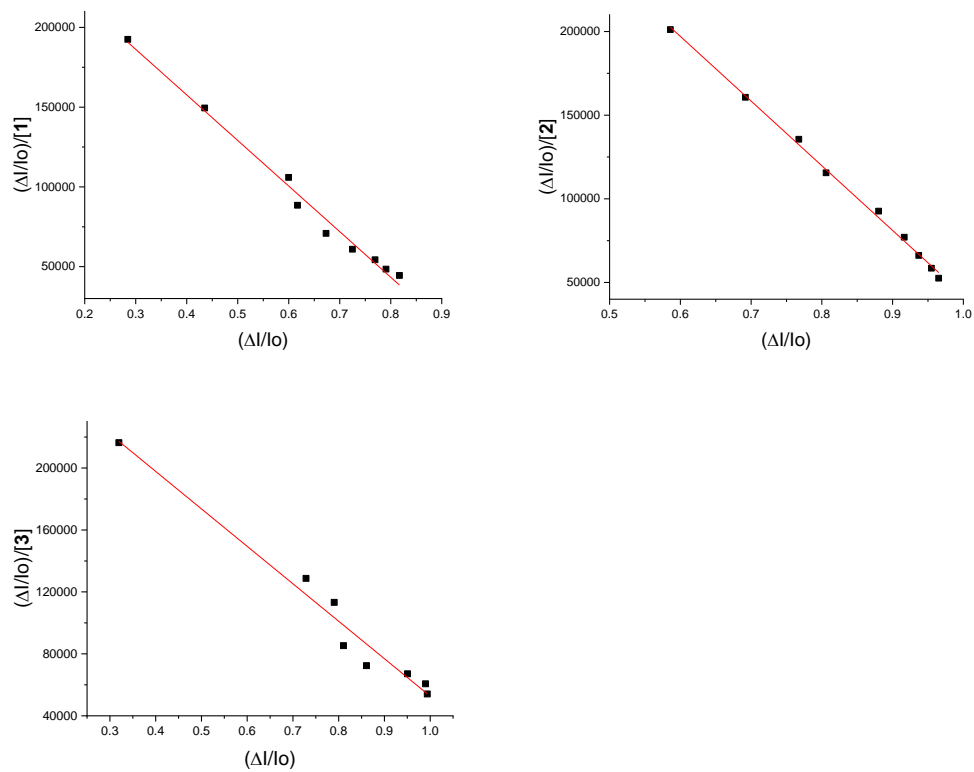

**Figure S5.** Scatchard plots of HSA for complexes 1-3.

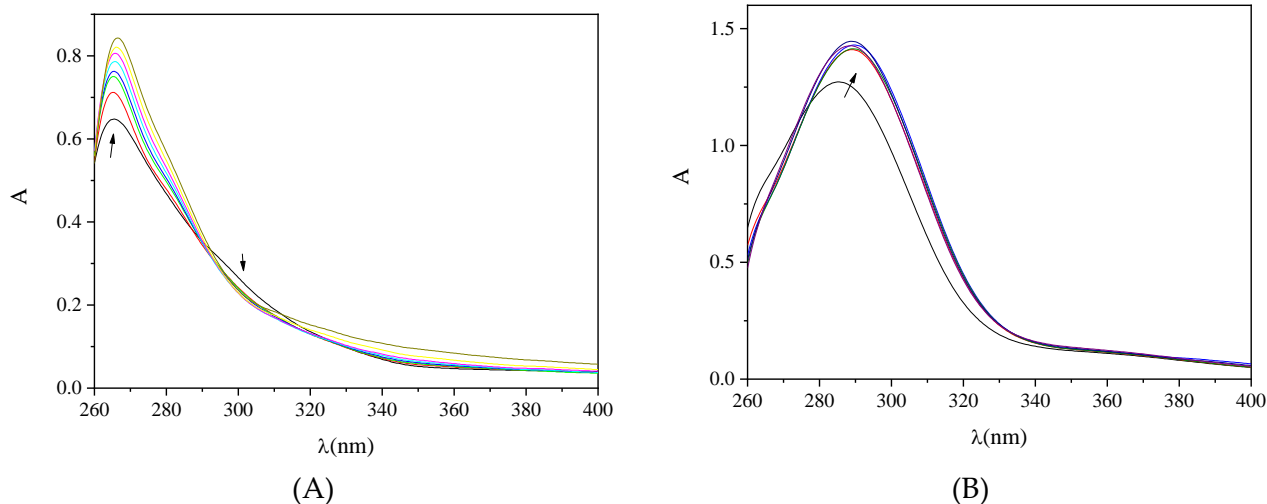

**Figure S6.** UV-vis spectra of a DMSO solution of ( $1 \times 10^{-5}$  M) complex (A) **1** and (B) **2**, in the presence of increasing amounts of CT DNA. The arrows show the changes upon addition of increasing amounts of CT DNA.

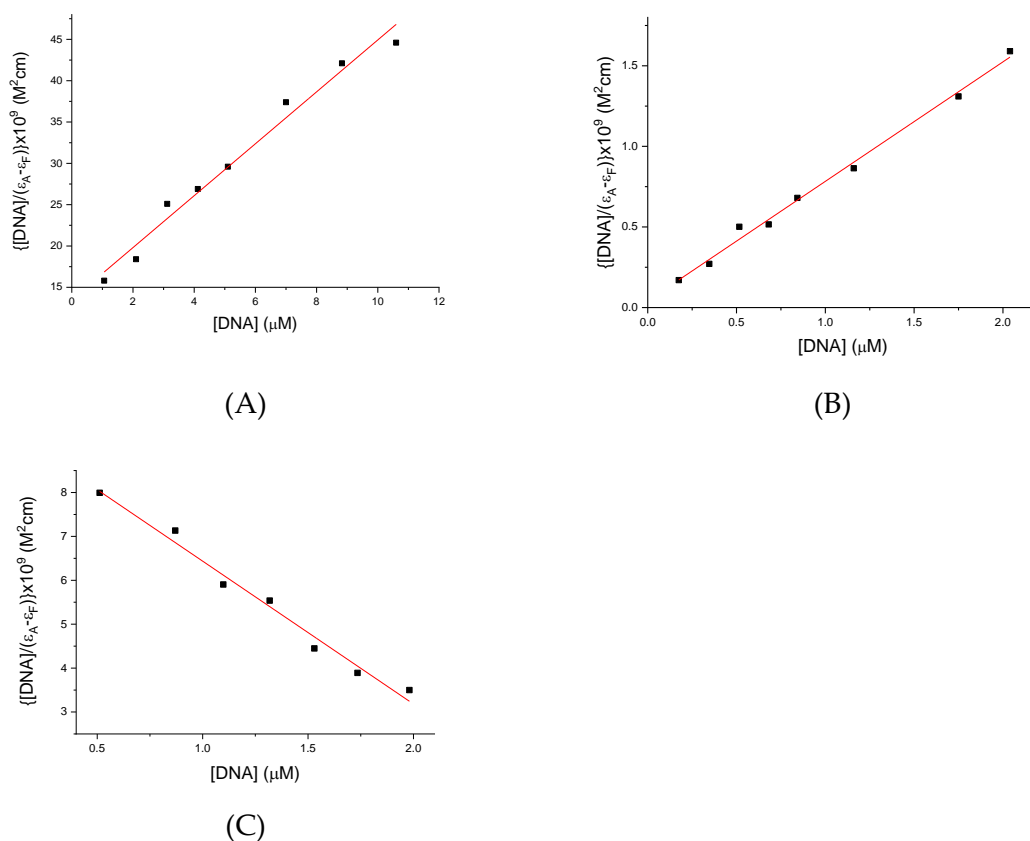

**Figure S7.** Plots of  $[DNA]/(\epsilon_A - \epsilon_F)$  versus [DNA] for complexes (A)-(C) **1-3**, respectively.

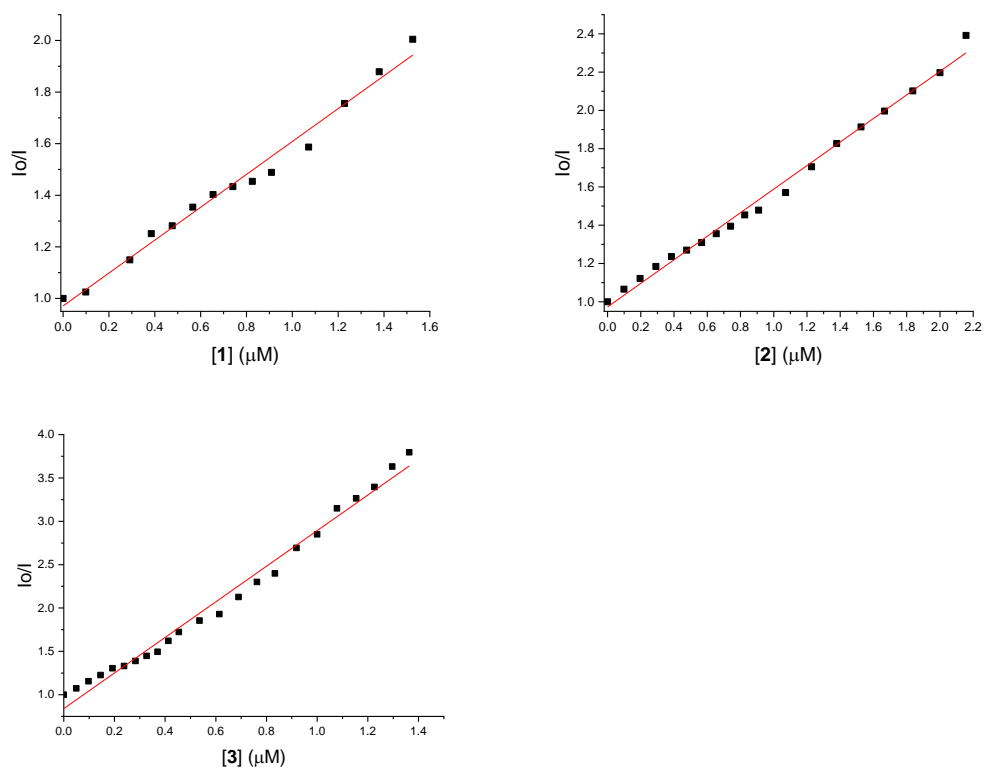

**Figure S8.** Stern-Volmer quenching plots of EB-DNA fluorescence for complexes 1-3.
