# Supplementary material for: Iron(III) Complexes with Non-Steroidal Anti-Inflammatory Drugs: Structure, Antioxidant and Anticholinergic Activity, and Interaction with Biomolecules
Source: Int J Mol Sci. 2023 Mar 28;24(7):6391. doi: 10.3390/ijms24076391 (PMC10094617; doi:10.3390/ijms24076391)
Supplement: Supplementary file 1 [file ijms-24-06391-s001.zip]

Archive with 7 entries (7 files):
- Checkcif of 1.pdf
- Checkcif of 2.pdf
- Checkcif of 3.pdf
- Cif of 1.cif
- Cif of 2.cif
- Cif of 3.cif
- ijms-2299359 - Supplementary.pdf
