# Supplementary material for: Iron(III) Complexes with Non-Steroidal Anti-Inflammatory Drugs: Structure, Antioxidant and Anticholinergic Activity, and Interaction with Biomolecules
Source: Int J Mol Sci. 2023 Mar 28;24(7):6391. doi: 10.3390/ijms24076391 (PMC10094617; doi:10.3390/ijms24076391)
Supplement: Supplementary file 1 [file ijms-24-06391-s001.zip › Cif of 1.cif]

data_global 
_audit_creation_date        "2020-12-22"
_audit_creation_method CRYSTALS_ver_14.61_build_6236 

_oxford_structure_analysis_title  'ps_fd889_0m in P-1'
_chemical_name_systematic         ?
_chemical_melting_point           ?

#looking for refcif 
 
 
# Check this file using the IUCr facility at: 
# http://checkcif.iucr.org/ 
 
# The content below is held in the file 'script/refcif.dat'. This is a text 
# file which you may edit to reflect local conditions. 
# Items which need looking at are represented by a '?'. 
# Items for which there are choices are prefixed with 'choose from'. 
 
_publ_contact_letter 
; 
 Please consider this CIF submission for 
 publication as a Short Format Paper in Acta 
 Crystallographica E. 
; 
_publ_contact_author_name         'Anthony Other' 
_publ_contact_author_address 
; 
 Chemical Crystallography Laboratory, 
 Department of Chemistry, 
 University of Nowhere, 
 Nowhere, NO1 4T, UK. 
; 
 
_publ_contact_author_phone        '+44 1865 000000' 
_publ_contact_author_fax          '+44 1865 000000' 
_publ_contact_author_email        'a.n.other@chem.no.ac.uk' 
_publ_requested_journal           'Section E' 
_publ_requested_category          EO # choose from: FI FM FO CI CM CO AD 
_publ_requested_coeditor_name     'Prof William Clegg' 
 
_publ_section_title 
# Title of paper - generally just the systematic or trivial name 
; ? 
; 
 
# The loop structure below should contain the names and addresses of all 
# authors, in the required order of publication. Repeat as necessary. 
loop_ 
 _publ_author_name 
 _publ_author_address 
 _publ_author_footnote 
 'Other, Anthony N.' # Author 1 
; 
 ? # Address for author 1 
; 
; 
 ? # Footnote for author 1 
; 
 'Else, S. O.' # Author 2 
; 
 ? # Address 2 
; 
; 
 ? # Footnote 2 
; 
 
 
_publ_section_abstract 
# Text of the abstract 
# (a) The Abstract must be self-contained and comprehensible 
# without the rest of the paper. This means no references 
# to atom names or to compound numbers; compounds must be 
# identified as the title compound, or by name or by some other 
# means such as derivatives of each other (e.g. "the 
# corresponding ketone"). 
# (b) The chemical formula of "the title compound" must be given. 
# (c) Any crystallographic molecular symmetry should be 
# mentioned, and also the presence of more than one molecule 
# in the asymmetric unit (i.e. anything other than Z'=1). 
; 
? 
; 
 
_publ_section_related_literature  # Not in version 2.3.1 
############################################################### 
# Essential references (e.g. to the origin of the material studied, related 
# structural studies, and to information supporting the reported structure) 
# should be cited in this section, with appropriate very brief explanatory 
# text, for example `The synthesis of the complex is described by Jones 
# (2001). The anhydrous complex has essentially the same coordination 
# geometry (Smith, 2003).' In addition, all references included in the 
# supplementary materials, but not elsewhere in the published article, 
# should be given here. The simple text `For related literature, see:...' 
# may be used, but further details should be provided in the Comment 
# section, which forms part of the supplementary material. 
############################################################### 
; 
? 
; 
 
_publ_section_comment 
# Text of the paper 
# Note that atoms are referenced as N2, not N(2) or N~2~ 
# If text containing () occur within (), the outer ones should be [] 
# Figures should be referenced as Fig. 
; 
? 
; 
_publ_section_acknowledgements    # Acknowledgments 
; 
? 
; 
_publ_section_figure_captions 
# Captions to figures - Start each caption on a new line after a blank line 
; 
Fig. 1. 
The title compound with displacement ellipsoids drawn at the 50% 
probability level. H atoms are shown as spheres of 
arbitary radius. 
 
; 
 
 
_publ_section_exptl_refinement 
# Some potentially useful phrases are donated by Bill Clegg: 
; 
In the absence of significant anomalous scattering, Friedel pairs were 
merged. 
 
The absolute configuration was arbitrarily assigned. 
 
The relatively large ratio of minimum to maximum corrections applied 
in the multiscan process (1:nnn) reflect changes in the illuminated 
volume of the crystal. 
 
Changes in illuminated volume were kept to a minimum, and were 
taken into account (G\"orbitz, 1999) by the multi-scan inter-frame 
scaling (DENZO/SCALEPACK, Otwinowski & Minor, 1997). 
 
 
G\"orbitz, C. H. (1999). Acta Cryst. B55, 1090-1098. 
 
 
 
 
The H atoms were all located in a difference map, but those 
attached to carbon atoms were repositioned geometrically. 
The H atoms were initially refined with soft restraints on the 
bond lengths and angles to regularise their geometry 
(C---H in the range 0.93--0.98, 
N---H in the range 0.86--0.89 
N---H to 0.86 
O---H = 0.82 
\%A) 
and 
U~iso~(H) (in the range 1.2-1.5 times U~eq~ of the parent atom), 
after which the positions were refined with riding constraints 
(Cooper et al, 2010). 
 
Cooper, R. I., Thompson, A. L. & Watkin, D. J. (2010). J. Appl. Cryst. 
43, 1100-1107. 
 
; 
 
_publ_section_exptl_prep 
# Brief details or a reference. Include solvent if known 
; 
? 
; 
 
# Hand-made tables can be put in the cif. The number of columns 
# is set in the loop header. 
# The contants of each column can either be a piece of text 
# without any spaces (eg a number) or other text enclosed in " " 
# Remove the leading # in the following example 
 
#_geom_extra_table_head_A 
#; 
#Table 2. 
#Molecular parameters deviating most from MOGUL averages 
#; 
# 
#loop_ 
#_geom_extra_tableA_col_1 
#_geom_extra_tableA_col_2 
#_geom_extra_tableA_col_3 
#_geom_extra_tableA_col_4 
# 
#Parameter "Observed Value" "MOGUL Value" "MOGUL e.s.d" 
#N5-C6-C4 129 124 "7 (\%)" 
#C3-O10-C2 105 109 "2 (\%)" 
#C6-O7 1.25 1.22 ".02 (\%A)" 
# 
 
data_I 
 
_exptl_special_details 
; 
 The crystal was 
placed in the cold stream of an Oxford 
Cryosystems open-flow nitrogen cryostat (Cosier & 
Glazer, 1986) with a nominal stability of 0.1K. 
 
Cosier, J. & Glazer, A.M., 1986. J. Appl. Cryst. 105-107. 
; 
_refine_special_details 
; 
? 
; 
#--------------------------------------------------------------- 
# _oxford_ data items, April 2010: 
# There is some uncertainty about the correct way of forming local data 
# names, e.g. 
 
# _atom_site_special_shape_oxford 
# or 
# _oxford_atom_site_special_shape 
 
# see: 
# http://www.iucr.org/resources/cif/spec/version1.1/semantics#namespace 
 
# A reserved prefix, e.g. foo, must be used in the following way 
# " If the data file contains items defined in a DDL1 dictionary, the 
# local data names assigned under the reserved prefix must contain it as 
# their first component, e.g. _foo_atom_site_my_item. " 
 
# However, this seems to say the opposite: 
# http://www.iucr.org/__data/iucr/cif/standard/cifstd8.html 
 
# According to advice from the IUCr, CRYSTALS is correct 
#--------------------------------------------------------------- 
# End of 'script/refcif.dat' 
#end of refcif 
_cell_length_a                    7.0270(16)
_cell_length_b                    11.719(3)
_cell_length_c                    15.665(4)
_cell_angle_alpha                 77.863(13)
_cell_angle_beta                  88.928(13)
_cell_angle_gamma                 72.872(12)
_cell_volume                      1204.0(5)
 
_symmetry_cell_setting            'triclinic' 
_symmetry_space_group_name_H-M    'P -1 ' 
_symmetry_space_group_name_Hall   ? 
loop_
 _symmetry_equiv_pos_as_xyz
 'x,y,z'
 '-x,-y,-z'

loop_
_atom_type_symbol
_atom_type_scat_dispersion_real
_atom_type_scat_dispersion_imag
_atom_type_scat_Cromer_Mann_a1
_atom_type_scat_Cromer_Mann_b1
_atom_type_scat_Cromer_Mann_a2
_atom_type_scat_Cromer_Mann_b2
_atom_type_scat_Cromer_Mann_a3
_atom_type_scat_Cromer_Mann_b3
_atom_type_scat_Cromer_Mann_a4
_atom_type_scat_Cromer_Mann_b4
_atom_type_scat_Cromer_Mann_c
_atom_type_scat_source  
 C       0.0033   0.0016   2.3100  20.8439   1.0200  10.2075   1.5886   0.5687
   0.8650  51.6512   0.2156 'International Tables Vol C 4.2.6.8 and 6.1.1.4'
 H       0.0000   0.0000   0.4930  10.5109   0.3229  26.1257   0.1402   3.1424
   0.0408  57.7998   0.0030 'International Tables Vol C 4.2.6.8 and 6.1.1.4'
 N       0.0061   0.0033  12.2126   0.0057   3.1322   9.8933   2.0125  28.9975
   1.1663   0.5826 -11.5290 'International Tables Vol C 4.2.6.8 and 6.1.1.4'
 O       0.0106   0.0060   3.0485  13.2771   2.2868   5.7011   1.5463   0.3239
   0.8670  32.9089   0.2508 'International Tables Vol C 4.2.6.8 and 6.1.1.4'
 F       0.0171   0.0103   3.5392  10.2825   2.6412   4.2944   1.5170   0.2615
   1.0243  26.1476   0.2776 'International Tables Vol C 4.2.6.8 and 6.1.1.4'
 Mn      0.3368   0.7283  11.2819   5.3409   7.3573   0.3432   3.0193  17.8674
   2.2441  83.7543   1.0896 'International Tables Vol C 4.2.6.8 and 6.1.1.4'
 Fe      0.3463   0.8444  11.7695   4.7611   7.3573   0.3072   3.5222  15.3535
   2.3045  76.8805   1.0369 'International Tables Vol C 4.2.6.8 and 6.1.1.4'
 
 
_cell_formula_units_Z                    1

# Given Formula = C40 H40 F8 Fe2 Mn4 N8 O8 
# Dc =      1.72 Fooo =    624.00 Mu =     16.92 M =   1244.20
# Found Formula = C52 H36 F4 Fe2 N4 O9 
# Dc =      1.45 FOOO =    536.00 Mu =      6.79 M =   1048.56

_chemical_formula_sum             'C52 H36 F4 Fe2 N4 O9'
_chemical_formula_moiety          'C52 H36 F4 Fe2 N4 O9'
_chemical_compound_source                ?
_chemical_formula_weight           1048.56
 
 
_cell_measurement_reflns_used          228
_cell_measurement_theta_min             10
_cell_measurement_theta_max             20
_cell_measurement_temperature          295
 
_exptl_crystal_description        'bar' 
_exptl_crystal_colour             'pink' 
_exptl_crystal_size_min           0.110 
_exptl_crystal_size_mid           0.140 
_exptl_crystal_size_max           0.320 
 
_exptl_crystal_density_diffrn     1.446 
_exptl_crystal_density_meas       ? 
_exptl_crystal_density_method     'not measured' 
# Non-dispersive F(000): 
_exptl_crystal_F_000              536 
_exptl_absorpt_coefficient_mu     0.679 
 
# Sheldrick geometric approximatio 0.91 0.93 
_exptl_absorpt_correction_type    numerical 
_exptl_absorpt_process_details 
; 
 Analytical Absorption (De Meulenaer & Tompa, 1965) 
; 
_exptl_absorpt_correction_T_min   0.91 
_exptl_absorpt_correction_T_max   0.93 
_diffrn_measurement_device_type   'Bruker Kappa Apex2' 
_diffrn_measurement_device        'Area' 
_diffrn_radiation_monochromator   'graphite' 
_diffrn_radiation_type            'Mo K\a'
_diffrn_radiation_wavelength           0.71073
_diffrn_measurement_method        '\f & \w scans' 
 
# If a reference occurs more than once, delete the author 
# and date from subsequent references. 
_computing_data_collection        'Apex2 (Bruker AXS, 2006)' 
_computing_cell_refinement        'Apex2 (Bruker AXS, 2006)' 
_computing_data_reduction         'Apex2 (Bruker AXS, 2006)' 
_computing_structure_solution     'Superflip (Palatinus & Chapuis, 2007)' 
_computing_structure_refinement   'CRYSTALS (Betteridge et al., 2003)' 
_computing_publication_material   'CRYSTALS (Betteridge et al., 2003)' 
_computing_molecular_graphics     'CAMERON (Watkin et al., 1996)' 
 
_diffrn_standards_interval_time   . 
_diffrn_standards_interval_count  . 
_diffrn_standards_number          0 
_diffrn_standards_decay_%         ? 
 
_diffrn_ambient_temperature        295
_diffrn_reflns_number             27894 
_reflns_number_total              4635 
_diffrn_reflns_av_R_equivalents   0.026 
# Number of reflections without Friedels Law is 0 
# Number of reflections with Friedels Law is 4635 
# Theoretical number of reflections is about 9412 
 
 
_diffrn_reflns_theta_min          1.331 
_diffrn_reflns_theta_max          25.945 
_diffrn_measured_fraction_theta_max 0.983 
 
_diffrn_reflns_theta_full         25.167 
_diffrn_measured_fraction_theta_full 0.997 
 
 
_diffrn_reflns_limit_h_min        -8 
_diffrn_reflns_limit_h_max        8 
_diffrn_reflns_limit_k_min        -14 
_diffrn_reflns_limit_k_max        14 
_diffrn_reflns_limit_l_min        -19 
_diffrn_reflns_limit_l_max        19 
_reflns_limit_h_min               -8 
_reflns_limit_h_max               8 
_reflns_limit_k_min               -13 
_reflns_limit_k_max               14 
_reflns_limit_l_min               0 
_reflns_limit_l_max               19 
 
_oxford_diffrn_Wilson_B_factor    2.84 
_oxford_diffrn_Wilson_scale       62.96 
 
_atom_sites_solution_primary      Other  #heavy,direct,difmap,geom,iterative
# _atom_sites_solution_secondary  difmap
_atom_sites_solution_hydrogens    difmap
 
_refine_diff_density_min          -0.32 
_refine_diff_density_max          0.33 
 
 
# The current dictionary definitions do not cover the 
# situation where the reflections used for refinement were 
# selected by a user-defined sigma threshold 
 
 
# The values actually used during refinement 
_oxford_reflns_threshold_expression_ref     I>2.0\s(I)
_refine_ls_number_reflns          3951 
_refine_ls_number_restraints      0 
_refine_ls_number_parameters      370 
_oxford_refine_ls_R_factor_ref    0.0478 
_refine_ls_wR_factor_ref          0.0762 
_refine_ls_goodness_of_fit_ref    1.0000 
_refine_ls_shift/su_max           0.0003166 
_refine_ls_shift/su_mean          0.0000207 
 
 
# The values computed with all filters except I/sigma 
_oxford_reflns_number_all         4596 
_refine_ls_R_factor_all           0.0610 
_refine_ls_wR_factor_all          0.0792 
 
# The values computed with a 2 sigma cutoff - a la SHELX 
_reflns_threshold_expression      I>2.0\s(I)
_reflns_number_gt                 3951 
_refine_ls_R_factor_gt            0.0478 
_refine_ls_wR_factor_gt           0.0762 
 
# choose from: rm (reference molecule of known chirality), 
# ad (anomolous dispersion - Flack), rmad (rm and ad), 
# syn (from synthesis), unk (unknown) or . (not applicable). 
_chemical_absolute_configuration  '.' 
 
 
_refine_ls_structure_factor_coef  Fsqd 
_refine_ls_matrix_type            full
_refine_ls_hydrogen_treatment     constr         #undef, noref, refall,
                                                 # refxyz, refU, constr or mixed
 
# WARNING. The IUCr will not accept pure Unit Weights for F-squared refinements 
_refine_ls_weighting_scheme       calc 
_refine_ls_weighting_details 
;
 Method= Quasi-Unit weights 
 W = 1.0 or 1./4Fsq 
;
# Insert your own references if required - in alphabetical order 
_publ_section_references 
; 
Betteridge, P.W., Carruthers, J.R., Cooper, R.I., 
Prout, K. & Watkin, D.J. (2003). J. Appl. Cryst. 36, 1487. 
 
Bruker Analytical X-ray Systems, Inc., 2006. <i>Apex2</i>, 
Version 2 User Manual, M86-E01078, Madison, WI. 
 
De Meulenaer, J. & Tompa, H. (1965). Acta Cryst. 19, 1014. 
 
Palatinus, L. & Chapuis, G. (2007). J. Appl. Cryst. 40, 786-790. 
 
Watkin, D.J., Prout, C.K. & Pearce, L.J. (1996). CAMERON, Chemical 
Crystallography Laboratory, Oxford, UK. 
; 

# Uequiv = arithmetic mean of Ui i.e. Ueqiv = (U1+U2+U3)/3

# Replace last . with number of unfound hydrogen atoms attached to an atom.

# ..._refinement_flags_... 
# . no refinement constraints           S special position constraint on site
# G rigid group refinement of site      R riding atom
# D distance or angle restraint on site T thermal displacement constraints
# U Uiso or Uij restraint (rigid bond)  P partial occupancy constraint


loop_
_atom_site_label
_atom_site_type_symbol
_atom_site_fract_x
_atom_site_fract_y
_atom_site_fract_z
_atom_site_U_iso_or_equiv
_atom_site_occupancy
_atom_site_adp_type
_atom_site_refinement_flags_posn
_atom_site_refinement_flags_adp
_atom_site_refinement_flags_occupancy
_atom_site_disorder_assembly
_atom_site_disorder_group
_atom_site_attached_hydrogens
Fe1 Fe 0.40147(6) 0.61703(4) 0.53611(3) 0.0347 1.0000 Uani . . . . . . 
N1 N 0.1207(3) 0.7643(2) 0.49738(16) 0.0364 1.0000 Uani . . . . . . 
N2 N 0.4657(3) 0.7334(2) 0.41717(16) 0.0363 1.0000 Uani . . . . . . 
O1 O 0.4954(3) 0.71027(18) 0.60362(14) 0.0424 1.0000 Uani . . . . . . 
O2 O 0.5694(4) 0.7879(2) 0.71048(16) 0.0594 1.0000 Uani . . . . . . 
O3 O 0.2724(3) 0.55363(18) 0.63692(14) 0.0422 1.0000 Uani . . . . . . 
O4 O 0.6589(3) 0.49035(16) 0.53654(13) 0.0355 1.0000 Uani . . . . . . 
O5 O 0.3956(9) 0.9856(5) 0.9589(4) 0.0953 0.5000 Uani . . . . . . 
C1 C 0.4843(5) 0.7205(3) 0.6830(2) 0.0506 1.0000 Uani . . . . . . 
C2 C 0.3683(5) 0.6529(3) 0.7422(2) 0.0507 1.0000 Uani . . . . . . 
C3 C 0.2655(5) 0.5806(3) 0.7132(2) 0.0503 1.0000 Uani . . . . . . 
C4 C 0.1455(5) 0.5324(3) 0.7718(2) 0.0601 1.0000 Uani . . . . . . 
C5 C 0.1220(6) 0.5679(4) 0.8535(3) 0.0654 1.0000 Uani . . . . . . 
C6 C 0.2274(6) 0.6363(4) 0.8844(3) 0.0643 1.0000 Uani . . . . . . 
C7 C 0.3520(6) 0.6794(3) 0.8259(2) 0.0607 1.0000 Uani . . . . . . 
C8 C 0.2190(7) 0.6685(4) 0.9726(3) 0.0744 1.0000 Uani . . . . . . 
C9 C 0.1654(13) 0.7915(9) 0.9776(6) 0.0750 0.5000 Uani . . . . 2 . 
C10 C 0.1566(12) 0.8221(8) 1.0610(5) 0.0670 0.5000 Uani . . . . 2 . 
C11 C 0.1823(7) 0.7287(4) 1.1355(3) 0.0759 1.0000 Uani . . . . . . 
C12 C 0.2603(11) 0.6091(8) 1.1294(5) 0.0663 0.5000 Uani . . . . 2 . 
C13 C 0.2644(12) 0.5797(8) 1.0487(5) 0.0662 0.5000 Uani . . . . 2 . 
C14 C -0.0537(4) 0.7801(3) 0.5361(2) 0.0389 1.0000 Uani . . . . . . 
C15 C -0.2170(4) 0.8788(3) 0.5087(2) 0.0410 1.0000 Uani . . . . . . 
C16 C -0.2046(4) 0.9649(3) 0.4381(2) 0.0421 1.0000 Uani . . . . . . 
C17 C -0.0314(4) 0.9534(3) 0.3933(2) 0.0405 1.0000 Uani . . . . . . 
C18 C -0.0093(5) 1.0392(3) 0.3195(2) 0.0469 1.0000 Uani . . . . . . 
C19 C 0.1680(5) 1.0253(3) 0.2769(2) 0.0471 1.0000 Uani . . . . . . 
C20 C 0.3352(4) 0.9261(3) 0.3100(2) 0.0420 1.0000 Uani . . . . . . 
C21 C 0.5148(4) 0.9018(3) 0.2728(2) 0.0446 1.0000 Uani . . . . . . 
C22 C 0.6676(5) 0.7987(3) 0.3060(2) 0.0448 1.0000 Uani . . . . . . 
C23 C 0.6370(4) 0.7158(3) 0.3787(2) 0.0406 1.0000 Uani . . . . . . 
C24 C 0.1301(4) 0.8549(3) 0.4250(2) 0.0377 1.0000 Uani . . . . . . 
C25 C 0.3151(4) 0.8378(3) 0.3844(2) 0.0377 1.0000 Uani . . . . . . 
C26 C 0.8171(4) 0.4639(3) 0.5981(2) 0.0422 1.0000 Uani . . . . . . 
C27 C 0.0301(12) 0.7023(7) 1.0062(5) 0.0647 0.5000 Uani . . . . 1 . 
C28 C 0.0098(12) 0.7333(7) 1.0892(5) 0.0602 0.5000 Uani . . . . 1 . 
C29 C 0.3707(11) 0.6822(6) 1.1065(5) 0.0514 0.5000 Uani . . . . 1 . 
C30 C 0.3888(11) 0.6562(6) 1.0227(5) 0.0568 0.5000 Uani . . . . 1 . 
F1 F 0.1064(8) 0.8816(5) 0.9043(4) 0.0918 0.5000 Uani . . . . 2 . 
F2 F 0.1603(4) 0.7514(2) 1.21535(16) 0.0825 1.0000 Uani . . . . . . 
F3 F -0.1410(7) 0.7120(5) 0.9567(3) 0.0875 0.5000 Uani . . . . 1 . 
H41 H 0.0832 0.4807 0.7568 0.0708 1.0000 Uiso R . . . . . 
H51 H 0.0250 0.5439 0.8895 0.0774 1.0000 Uiso R . . . . . 
H71 H 0.4248 0.7280 0.8428 0.0715 1.0000 Uiso R . . . . . 
H101 H 0.1352 0.9029 1.0660 0.0781 0.5000 Uiso R . . . 2 . 
H121 H 0.3055 0.5484 1.1788 0.0802 0.5000 Uiso R . . . 2 . 
H131 H 0.2993 0.4957 1.0452 0.0770 0.5000 Uiso R . . . 2 . 
H141 H -0.0609 0.7204 0.5841 0.0475 1.0000 Uiso R . . . . . 
H151 H -0.3370 0.8884 0.5368 0.0493 1.0000 Uiso R . . . . . 
H161 H -0.3126 1.0335 0.4188 0.0503 1.0000 Uiso R . . . . . 
H181 H -0.1171 1.1066 0.2956 0.0559 1.0000 Uiso R . . . . . 
H191 H 0.1760 1.0794 0.2259 0.0561 1.0000 Uiso R . . . . . 
H211 H 0.5303 0.9556 0.2240 0.0535 1.0000 Uiso R . . . . . 
H221 H 0.7879 0.7819 0.2809 0.0550 1.0000 Uiso R . . . . . 
H231 H 0.7407 0.6479 0.4033 0.0490 1.0000 Uiso R . . . . . 
H261 H 0.9159 0.3931 0.5917 0.0634 1.0000 Uiso R . . . . . 
H262 H 0.7684 0.4539 0.6550 0.0628 1.0000 Uiso R . . . . . 
H263 H 0.8775 0.5294 0.5896 0.0635 1.0000 Uiso R . . . . . 
H281 H -0.1163 0.7573 1.1126 0.0707 0.5000 Uiso R . . . 1 . 
H291 H 0.4841 0.6699 1.1406 0.0619 0.5000 Uiso R . . . 1 . 
H301 H 0.5161 0.6273 1.0016 0.0679 0.5000 Uiso R . . . 1 . 
H331 H 0.3338 0.9367 0.9485 0.1419 0.5000 Uiso R . . . . . 
H332 H 0.4036 0.9982 1.0099 0.1418 0.5000 Uiso R . . . . . 
loop_
_atom_site_aniso_label
_atom_site_aniso_U_11
_atom_site_aniso_U_22
_atom_site_aniso_U_33
_atom_site_aniso_U_23
_atom_site_aniso_U_13
_atom_site_aniso_U_12
Fe1 0.0307(2) 0.0302(2) 0.0466(3) -0.01512(18) 0.00592(17) -0.00974(16) 
N1 0.0321(13) 0.0312(13) 0.0501(16) -0.0158(11) 0.0064(11) -0.0110(10) 
N2 0.0323(12) 0.0326(13) 0.0461(15) -0.0148(11) 0.0037(11) -0.0084(10) 
O1 0.0433(12) 0.0392(12) 0.0503(14) -0.0184(10) 0.0057(10) -0.0146(9) 
O2 0.0606(15) 0.0592(15) 0.0656(17) -0.0244(13) 0.0040(12) -0.0211(12) 
O3 0.0405(12) 0.0379(11) 0.0518(14) -0.0147(10) 0.0093(10) -0.0140(9) 
O4 0.0308(10) 0.0298(10) 0.0495(13) -0.0162(9) 0.0049(9) -0.0094(8) 
O5 0.088(4) 0.076(4) 0.108(5) -0.016(4) 0.010(4) -0.007(3) 
C1 0.0486(19) 0.0487(19) 0.054(2) -0.0196(17) 0.0023(16) -0.0084(16) 
C2 0.051(2) 0.0471(19) 0.052(2) -0.0173(16) 0.0066(16) -0.0070(15) 
C3 0.0463(19) 0.0481(19) 0.054(2) -0.0131(17) 0.0086(16) -0.0089(15) 
C4 0.062(2) 0.061(2) 0.058(2) -0.0136(19) 0.0125(18) -0.0199(19) 
C5 0.067(2) 0.065(2) 0.065(3) -0.018(2) 0.011(2) -0.019(2) 
C6 0.065(2) 0.063(2) 0.065(3) -0.021(2) 0.012(2) -0.0140(19) 
C7 0.059(2) 0.060(2) 0.060(2) -0.0149(19) 0.0074(18) -0.0096(18) 
C8 0.078(3) 0.075(3) 0.071(3) -0.017(2) 0.006(2) -0.023(2) 
C9 0.078(6) 0.079(6) 0.063(6) -0.019(5) 0.011(4) -0.012(5) 
C10 0.068(5) 0.061(5) 0.068(5) -0.014(4) -0.003(4) -0.013(4) 
C11 0.083(3) 0.081(3) 0.066(3) -0.017(2) 0.005(2) -0.027(2) 
C12 0.064(5) 0.065(5) 0.059(5) -0.013(4) -0.004(4) -0.002(4) 
C13 0.066(5) 0.069(5) 0.059(5) -0.017(4) 0.000(4) -0.011(4) 
C14 0.0351(15) 0.0347(15) 0.0505(19) -0.0158(14) 0.0071(14) -0.0113(13) 
C15 0.0339(16) 0.0361(16) 0.056(2) -0.0161(15) 0.0063(14) -0.0102(13) 
C16 0.0331(16) 0.0350(16) 0.057(2) -0.0151(15) 0.0045(14) -0.0046(13) 
C17 0.0356(16) 0.0319(15) 0.054(2) -0.0134(14) 0.0045(14) -0.0079(12) 
C18 0.0437(18) 0.0376(17) 0.058(2) -0.0137(16) 0.0040(15) -0.0076(14) 
C19 0.0439(18) 0.0406(17) 0.055(2) -0.0097(15) 0.0055(15) -0.0107(14) 
C20 0.0410(17) 0.0350(16) 0.0498(19) -0.0116(14) 0.0057(14) -0.0093(13) 
C21 0.0404(17) 0.0428(17) 0.051(2) -0.0102(15) 0.0058(15) -0.0136(14) 
C22 0.0375(17) 0.0432(18) 0.055(2) -0.0140(15) 0.0089(15) -0.0119(14) 
C23 0.0342(16) 0.0378(16) 0.053(2) -0.0157(14) 0.0068(14) -0.0112(13) 
C24 0.0330(15) 0.0332(15) 0.0508(19) -0.0158(14) 0.0041(13) -0.0108(12) 
C25 0.0348(15) 0.0338(15) 0.0467(18) -0.0140(14) 0.0044(13) -0.0097(12) 
C26 0.0334(16) 0.0373(16) 0.057(2) -0.0187(15) -0.0012(14) -0.0052(13) 
C27 0.064(5) 0.073(5) 0.062(5) -0.023(4) 0.007(4) -0.023(4) 
C28 0.066(5) 0.066(5) 0.051(4) -0.012(4) 0.003(4) -0.023(4) 
C29 0.055(4) 0.049(4) 0.050(4) -0.009(3) -0.002(3) -0.015(3) 
C30 0.059(4) 0.057(4) 0.054(5) -0.015(4) -0.002(4) -0.014(4) 
F1 0.095(4) 0.089(4) 0.085(4) -0.017(3) 0.008(3) -0.019(3) 
F2 0.0909(18) 0.0900(17) 0.0716(16) -0.0231(14) 0.0065(13) -0.0305(14) 
F3 0.083(3) 0.096(4) 0.089(4) -0.031(3) 0.012(3) -0.027(3) 

_refine_ls_extinction_method 
    'None'
_oxford_refine_ls_scale 0.18506(8) 
loop_
 _geom_bond_atom_site_label_1
 _geom_bond_site_symmetry_1
 _geom_bond_atom_site_label_2
 _geom_bond_site_symmetry_2
 _geom_bond_distance
 _geom_bond_publ_flag
Fe1 . O4 2_666 1.9984(19)    yes
Fe1 . N1 . 2.200(2)    yes
Fe1 . N2 . 2.191(3)    yes
Fe1 . O1 . 1.920(2)    yes
Fe1 . O3 . 1.928(2)    yes
Fe1 . O4 . 1.9726(19)    yes
N1 . C14 . 1.338(3)    yes
N1 . C24 . 1.396(4)    yes
N2 . C23 . 1.317(3)    yes
N2 . C25 . 1.369(4)    yes
O1 . C1 . 1.273(4)    yes
O2 . C1 . 1.264(4)    yes
O3 . C3 . 1.295(4)    yes
O4 . C26 . 1.405(3)    yes
O5 . H331 . 0.856    no
O5 . H332 . 0.848    no
C1 . C2 . 1.481(5)    yes
C2 . C3 . 1.407(5)    yes
C2 . C7 . 1.405(5)    yes
C3 . C4 . 1.381(5)    yes
C4 . C5 . 1.419(5)    yes
C4 . H41 . 0.913    no
C5 . C6 . 1.397(5)    yes
C5 . H51 . 0.945    no
C6 . C7 . 1.378(5)    yes
C6 . C8 . 1.502(6)    yes
C7 . H71 . 0.947    no
C8 . C27 . 1.396(8)    yes
C8 . C30 . 1.395(8)    yes
C9 . C10 . 1.421(11)    yes
C9 . F1 . 1.362(10)    yes
C10 . C11 . 1.395(9)    yes
C10 . H101 . 0.934    no
C11 . C28 . 1.405(8)    yes
C11 . C29 . 1.382(8)    yes
C11 . F2 . 1.330(5)    yes
C12 . C13 . 1.375(10)    yes
C12 . H121 . 0.922    no
C13 . H131 . 0.955    no
C14 . C15 . 1.366(4)    yes
C14 . H141 . 0.925    no
C15 . C16 . 1.352(4)    yes
C15 . H151 . 0.932    no
C16 . C17 . 1.380(4)    yes
C16 . H161 . 0.927    no
C17 . C18 . 1.402(4)    yes
C17 . C24 . 1.369(4)    yes
C18 . C19 . 1.385(4)    yes
C18 . H181 . 0.934    no
C19 . C20 . 1.402(4)    yes
C19 . H191 . 0.922    no
C20 . C21 . 1.358(4)    yes
C20 . C25 . 1.422(4)    yes
C21 . C22 . 1.369(4)    yes
C21 . H211 . 0.910    no
C22 . C23 . 1.392(4)    yes
C22 . H221 . 0.911    no
C23 . H231 . 0.924    no
C24 . C25 . 1.416(4)    yes
C26 . H261 . 0.935    no
C26 . H262 . 0.945    no
C26 . H263 . 0.966    no
C27 . C28 . 1.416(10)    yes
C27 . F3 . 1.406(9)    yes
C28 . H281 . 0.940    no
C29 . C30 . 1.404(9)    yes
C29 . H291 . 0.925    no
C30 . H301 . 0.939    no
loop_
 _geom_angle_atom_site_label_1
 _geom_angle_site_symmetry_1
 _geom_angle_atom_site_label_2
 _geom_angle_site_symmetry_2
 _geom_angle_atom_site_label_3
 _geom_angle_site_symmetry_3
 _geom_angle
 _geom_angle_publ_flag
O4 2_666 Fe1 . N1 . 94.36(9)    yes
O4 2_666 Fe1 . N2 . 89.39(9)    yes
N1 . Fe1 . N2 . 75.03(9)    yes
O4 2_666 Fe1 . O1 . 172.52(8)    yes
N1 . Fe1 . O1 . 92.17(9)    yes
N2 . Fe1 . O1 . 88.77(9)    yes
O4 2_666 Fe1 . O3 . 94.19(9)    yes
N1 . Fe1 . O3 . 88.11(9)    yes
N2 . Fe1 . O3 . 163.00(8)    yes
O1 . Fe1 . O3 . 89.66(9)    yes
O4 2_666 Fe1 . O4 . 76.46(9)    yes
N1 . Fe1 . O4 . 164.56(9)    yes
N2 . Fe1 . O4 . 92.27(9)    yes
O1 . Fe1 . O4 . 96.36(8)    yes
O3 . Fe1 . O4 . 104.73(9)    yes
Fe1 . N1 . C14 . 128.4(2)    yes
Fe1 . N1 . C24 . 115.06(18)    yes
C14 . N1 . C24 . 116.5(2)    yes
Fe1 . N2 . C23 . 126.1(2)    yes
Fe1 . N2 . C25 . 115.52(18)    yes
C23 . N2 . C25 . 118.2(3)    yes
Fe1 . O1 . C1 . 134.7(2)    yes
Fe1 . O3 . C3 . 127.4(2)    yes
Fe1 2_666 O4 . Fe1 . 103.54(9)    yes
Fe1 2_666 O4 . C26 . 128.96(16)    yes
Fe1 . O4 . C26 . 124.20(16)    yes
H331 . O5 . H332 . 121.1    no
O1 . C1 . O2 . 120.5(3)    yes
O1 . C1 . C2 . 118.7(3)    yes
O2 . C1 . C2 . 120.7(3)    yes
C1 . C2 . C3 . 122.4(3)    yes
C1 . C2 . C7 . 113.7(3)    yes
C3 . C2 . C7 . 123.6(3)    yes
C2 . C3 . O3 . 126.7(3)    yes
C2 . C3 . C4 . 117.2(3)    yes
O3 . C3 . C4 . 116.1(3)    yes
C3 . C4 . C5 . 117.6(4)    yes
C3 . C4 . H41 . 119.8    no
C5 . C4 . H41 . 122.6    no
C4 . C5 . C6 . 125.7(4)    yes
C4 . C5 . H51 . 116.7    no
C6 . C5 . H51 . 117.6    no
C5 . C6 . C7 . 115.1(4)    yes
C5 . C6 . C8 . 127.8(4)    yes
C7 . C6 . C8 . 117.0(4)    yes
C2 . C7 . C6 . 120.4(4)    yes
C2 . C7 . H71 . 120.8    no
C6 . C7 . H71 . 118.8    no
C6 . C8 . C27 . 116.1(5)    yes
C6 . C8 . C30 . 123.1(5)    yes
C27 . C8 . C30 . 120.6(6)    yes
C8 . C9 . C10 . 119.2(8)    yes
C8 . C9 . F1 . 120.8(7)    yes
C10 . C9 . F1 . 119.8(8)    yes
C9 . C10 . C11 . 118.6(7)    yes
C9 . C10 . H101 . 120.8    no
C11 . C10 . H101 . 120.6    no
C28 . C11 . C29 . 121.6(5)    yes
C28 . C11 . F2 . 117.2(5)    yes
C29 . C11 . F2 . 120.2(5)    yes
C11 . C12 . C13 . 119.2(7)    yes
C11 . C12 . H121 . 120.7    no
C13 . C12 . H121 . 120.1    no
C8 . C13 . C12 . 121.7(7)    yes
C8 . C13 . H131 . 119.0    no
C12 . C13 . H131 . 119.3    no
N1 . C14 . C15 . 123.5(3)    yes
N1 . C14 . H141 . 116.9    no
C15 . C14 . H141 . 119.6    no
C14 . C15 . C16 . 118.9(3)    yes
C14 . C15 . H151 . 122.2    no
C16 . C15 . H151 . 118.9    no
C15 . C16 . C17 . 121.0(3)    yes
C15 . C16 . H161 . 120.6    no
C17 . C16 . H161 . 118.4    no
C16 . C17 . C18 . 123.7(3)    yes
C16 . C17 . C24 . 117.8(3)    yes
C18 . C17 . C24 . 118.4(3)    yes
C17 . C18 . C19 . 122.1(3)    yes
C17 . C18 . H181 . 120.6    no
C19 . C18 . H181 . 117.3    no
C18 . C19 . C20 . 119.9(3)    yes
C18 . C19 . H191 . 120.5    no
C20 . C19 . H191 . 119.6    no
C19 . C20 . C21 . 125.0(3)    yes
C19 . C20 . C25 . 118.7(3)    yes
C21 . C20 . C25 . 116.1(3)    yes
C20 . C21 . C22 . 121.6(3)    yes
C20 . C21 . H211 . 117.9    no
C22 . C21 . H211 . 120.5    no
C21 . C22 . C23 . 119.2(3)    yes
C21 . C22 . H221 . 121.7    no
C23 . C22 . H221 . 119.0    no
C22 . C23 . N2 . 122.1(3)    yes
C22 . C23 . H231 . 120.0    no
N2 . C23 . H231 . 117.8    no
N1 . C24 . C17 . 122.2(3)    yes
N1 . C24 . C25 . 116.3(3)    yes
C17 . C24 . C25 . 121.5(3)    yes
C20 . C25 . C24 . 119.3(3)    yes
C20 . C25 . N2 . 122.8(3)    yes
C24 . C25 . N2 . 117.8(3)    yes
O4 . C26 . H261 . 109.9    no
O4 . C26 . H262 . 109.3    no
H261 . C26 . H262 . 110.6    no
O4 . C26 . H263 . 111.1    no
H261 . C26 . H263 . 107.4    no
H262 . C26 . H263 . 108.5    no
C8 . C27 . C28 . 119.5(7)    yes
C8 . C27 . F3 . 120.7(6)    yes
C28 . C27 . F3 . 119.7(7)    yes
C27 . C28 . C11 . 118.5(7)    yes
C27 . C28 . H281 . 120.7    no
C11 . C28 . H281 . 120.7    no
C11 . C29 . C30 . 118.9(6)    yes
C11 . C29 . H291 . 121.4    no
C30 . C29 . H291 . 119.7    no
C29 . C30 . C8 . 120.2(7)    yes
C29 . C30 . H301 . 119.6    no
C8 . C30 . H301 . 120.2    no
loop_
 _geom_hbond_atom_site_label_D
 _geom_hbond_site_symmetry_D
 _geom_hbond_atom_site_label_H
 _geom_hbond_site_symmetry_H
 _geom_hbond_atom_site_label_A
 _geom_hbond_site_symmetry_A
 _geom_hbond_angle_DHA
 _geom_hbond_distance_DH
 _geom_hbond_distance_HA
 _geom_hbond_distance_DA
 _geom_hbond_publ_flag
O5 . H331 . C9 . 158 0.86 2.31 3.123(7)    yes
O5 . H331 . C10 . 125 0.86 2.52 3.092(7)    yes


_iucr_refine_instructions_details
;
#
# Punched on 22/12/20 at 10:09:31
#
#LIST     12                                                                    
BLOCK SCALE X'S  U'S 
RIDE O   (   5,X'S) H   ( 331,X'S) H   ( 332,X'S) 
RIDE C   (   4,X'S) H   (  41,X'S) 
RIDE C   (   5,X'S) H   (  51,X'S) 
RIDE C   (   7,X'S) H   (  71,X'S) 
RIDE C   (  10,X'S) H   ( 101,X'S) 
RIDE C   (  12,X'S) H   ( 121,X'S) 
RIDE C   (  13,X'S) H   ( 131,X'S) 
RIDE C   (  14,X'S) H   ( 141,X'S) 
RIDE C   (  15,X'S) H   ( 151,X'S) 
RIDE C   (  16,X'S) H   ( 161,X'S) 
RIDE C   (  18,X'S) H   ( 181,X'S) 
RIDE C   (  19,X'S) H   ( 191,X'S) 
RIDE C   (  21,X'S) H   ( 211,X'S) 
RIDE C   (  22,X'S) H   ( 221,X'S) 
RIDE C   (  23,X'S) H   ( 231,X'S) 
RIDE C   (  26,X'S) H   ( 261,X'S) H   ( 262,X'S) H   ( 263,X'S) 
RIDE C   (  28,X'S) H   ( 281,X'S) 
RIDE C   (  29,X'S) H   ( 291,X'S) 
RIDE C   (  30,X'S) H   ( 301,X'S) 
END                                                                             
#
# Punched on 22/12/20 at 10:09:31
#
#LIST     16                                                                    
NO 
REM   HREST   START (DO NOT REMOVE THIS LINE) 
REM   HREST   END (DO NOT REMOVE THIS LINE) 
END                                                                             
;

# Manually omitted reflections

loop_
_oxford_refln_omitted_index_h
_oxford_refln_omitted_index_k
_oxford_refln_omitted_index_l
_oxford_refln_omitted_flag
_oxford_refln_omitted_details
  -1   2   3  x   .
  -1   2   4  x   .
   1   3   0  x   .
   2   1   0  x   .
  -2  -4   1  x   .
  -1  -4   1  x   .
   0   0   4  x   .
  -1   1   4  x   .
  -2   5   1  x   .
   0   0   0  x   .
  -2  -5   1  x   .
   1   4   0  x   .
# looking for ARCHIVE-HKL.CIF 
 
_iucr_refine_reflections_details 
; 
# An asterisk in column 34 indicates a format overflow 
# Data was input as F-squared 
  -1   0   0   80.15    1.76 
   1   0   0   75.29    1.75 
  -2   0   0    6.41    0.08 
  -2   0   0    6.73    0.08 
  -2   0   0    7.18    0.10 
  -2   0   0    6.42    0.12 
  -2   0   0    6.36    0.08 
   2   0   0    6.58    0.09 
   2   0   0    6.54    0.09 
   2   0   0    6.79    0.12 
   2   0   0    6.44    0.08 
  -3   0   0    7.39    0.05 
  -3   0   0    7.30    0.05 
  -3   0   0    7.55    0.06 
  -3   0   0    7.34    0.07 
  -3   0   0    7.37    0.07 
  -3   0   0    7.55    0.08 
  -3   0   0    7.47    0.11 
   3   0   0    7.29    0.06 
   3   0   0    7.34    0.06 
   3   0   0    7.70    0.08 
   3   0   0    7.88    0.13 
   3   0   0    7.47    0.06 
  -4   0   0   26.13    0.18 
  -4   0   0   26.40    0.22 
  -4   0   0   25.83    0.20 
  -4   0   0   26.07    0.20 
  -4   0   0   25.75    0.27 
  -4   0   0   25.30    0.20 
  -4   0   0   26.11    0.18 
   4   0   0   26.20    0.20 
   4   0   0   26.01    0.20 
   4   0   0   26.85    0.32 
   4   0   0   25.72    0.20 
   4   0   0   25.62    0.21 
  -5   0   0   11.18    0.18 
  -5   0   0   10.90    0.16 
  -5   0   0   11.42    0.14 
   5   0   0   10.89    0.13 
   5   0   0   11.10    0.24 
   5   0   0   10.82    0.15 
   5   0   0   10.78    0.14 
   5   0   0   11.08    0.17 
  -6   0   0    1.43    0.15 
  -6   0   0    2.14    0.14 
  -6   0   0    1.80    0.17 
   6   0   0    2.25    0.26 
   6   0   0    1.67    0.18 
   6   0   0    1.42    0.12 
   6   0   0    1.68    0.15 
  -7   0   0   -0.02    0.15 
  -7   0   0   -0.02    0.19 
   7   0   0    0.01    0.29 
   7   0   0   -0.17    0.14 
  -8   0   0    1.21    0.18 
  -8   0   0    1.35    0.23 
   8   0   0    1.28    0.26 
   8   0   0    0.54    0.36 
  -8   1   0    2.79    0.21 
   7  -1   0    0.43    0.30 
  -7   1   0    0.62    0.21 
  -7   1   0    0.82    0.16 
   6  -1   0   10.36    0.19 
   6  -1   0   10.71    0.35 
   6  -1   0   10.42    0.21 
   6  -1   0   10.47    0.23 
  -6   1   0   10.96    0.21 
  -6   1   0   11.25    0.26 
   5  -1   0   -0.23    0.08 
   5  -1   0   -0.01    0.11 
   5  -1   0   -0.09    0.07 
   5  -1   0    0.33    0.20 
   5  -1   0   -0.13    0.10 
  -5   1   0   -0.06    0.13 
  -5   1   0    0.01    0.10 
  -5   1   0    0.09    0.11 
   4  -1   0   34.28    0.37 
   4  -1   0   34.01    0.36 
   4  -1   0   34.89    0.36 
   4  -1   0   35.15    0.37 
   4  -1   0   34.98    0.47 
  -4   1   0   34.33    0.38 
  -4   1   0   34.01    0.43 
  -4   1   0   35.98    0.36 
  -4   1   0   33.96    0.37 
   3  -1   0   35.10    0.48 
   3  -1   0   35.09    0.48 
   3  -1   0   36.68    0.48 
   3  -1   0   37.04    0.48 
   3  -1   0   35.88    0.54 
  -3   1   0   37.14    0.48 
  -3   1   0   35.73    0.48 
  -3   1   0   35.56    0.53 
  -3   1   0   35.82    0.49 
   2  -1   0   37.24    0.66 
   2  -1   0   36.84    0.70 
   2  -1   0   37.35    0.66 
  -2   1   0   34.56    0.66 
  -2   1   0   37.21    0.66 
  -2   1   0   36.14    0.69 
  -2   1   0   37.12    0.66 
  -2   1   0   35.64    0.67 
   1  -1   0   72.65    0.38 
   1  -1   0   71.90    0.40 
  -1   1   0   72.76    0.38 
  -1   1   0   72.67    0.38 
  -1   1   0   71.45    0.38 
   0  -1   0   70.57    0.01 
   0  -1   0   70.58    0.01 
   0  -1   0   70.57    0.01 
   0  -1   0   70.58    0.01 
   0  -1   0   70.55    0.01 
   0  -1   0   70.57    0.01 
   0   1   0   -0.04    0.01 
   0   1   0   -0.02    0.00 
   0   1   0    0.00    0.01 
   0   1   0   -0.02    0.02 
   0   1   0   -0.02    0.01 
   0   1   0   -0.05    0.01 
  -1  -1   0  690.80    5.95 
  -1  -1   0  700.61    5.95 
   1   1   0  721.16    5.95 
  -2  -1   0   23.94    0.08 
  -2  -1   0   23.51    0.08 
  -2  -1   0   24.01    0.08 
  -2  -1   0   23.43    0.11 
   2   1   0   24.03    0.12 
   2   1   0   24.14    0.08 
   2   1   0   23.51    0.07 
  -3  -1   0    3.94    0.08 
  -3  -1   0    3.87    0.08 
  -3  -1   0    4.01    0.12 
  -3  -1   0    4.24    0.09 
  -3  -1   0    4.20    0.09 
  -3  -1   0    4.25    0.09 
   3   1   0    3.93    0.08 
   3   1   0    4.32    0.14 
   3   1   0    4.47    0.10 
   3   1   0    4.00    0.09 
   3   1   0    4.08    0.08 
  -4  -1   0    1.58    0.12 
  -4  -1   0    1.94    0.11 
  -4  -1   0    1.77    0.13 
  -4  -1   0    1.77    0.11 
  -4  -1   0    1.74    0.11 
  -4  -1   0    1.48    0.16 
  -4  -1   0    1.80    0.12 
   4   1   0    2.08    0.19 
   4   1   0    1.90    0.12 
   4   1   0    2.00    0.13 
   4   1   0    1.75    0.12 
   4   1   0    1.62    0.11 
  -5  -1   0   10.10    0.15 
  -5  -1   0   10.44    0.18 
  -5  -1   0    9.65    0.21 
  -5  -1   0    9.95    0.15 
  -5  -1   0   10.55    0.16 
  -5  -1   0    9.78    0.17 
   5   1   0   10.25    0.17 
   5   1   0    9.90    0.16 
   5   1   0   10.40    0.16 
   5   1   0   10.07    0.19 
   5   1   0   10.19    0.25 
  -6  -1   0    6.79    0.16 
  -6  -1   0    5.44    0.12 
  -6  -1   0    5.88    0.19 
  -6  -1   0    6.14    0.13 
  -6  -1   0    5.97    0.19 
   6   1   0    6.46    0.30 
   6   1   0    6.51    0.20 
   6   1   0    6.46    0.20 
   6   1   0    5.69    0.16 
  -7  -1   0    5.39    0.19 
  -7  -1   0    5.46    0.24 
   7   1   0    4.84    0.33 
   7   1   0    4.96    0.20 
   7   1   0    5.76    0.26 
  -8  -1   0    0.15    0.21 
  -8  -1   0    0.38    0.17 
   8   1   0    0.19    0.20 
   7  -2   0    1.13    0.33 
  -7   2   0    0.89    0.22 
  -7   2   0    1.40    0.18 
   6  -2   0    5.67    0.21 
   6  -2   0    5.16    0.16 
   6  -2   0    5.97    0.33 
  -6   2   0    6.20    0.21 
  -6   2   0    5.75    0.24 
   5  -2   0   14.99    0.24 
   5  -2   0   17.04    0.42 
   5  -2   0   16.64    0.27 
  -5   2   0   17.10    0.26 
  -5   2   0   16.04    0.29 
   4  -2   0   12.47    0.16 
   4  -2   0   12.32    0.16 
   4  -2   0   12.33    0.15 
   4  -2   0   12.28    0.24 
  -4   2   0   12.06    0.19 
  -4   2   0   12.41    0.14 
  -4   2   0   12.51    0.18 
   3  -2   0   51.58    0.57 
   3  -2   0   52.18    0.49 
   3  -2   0   51.71    0.49 
   3  -2   0   51.44    0.49 
  -3   2   0   52.63    0.51 
  -3   2   0   50.82    0.49 
  -3   2   0   51.62    0.49 
   2  -2   0  237.10    2.54 
   2  -2   0  236.18    2.57 
   2  -2   0  236.42    2.54 
   2  -2   0  235.07    2.54 
  -2   2   0  231.42    2.55 
  -2   2   0  237.81    2.55 
  -2   2   0  232.93    2.54 
   1  -2   0  427.37    5.82 
   1  -2   0  426.84    5.82 
   1  -2   0  430.28    5.83 
  -1   2   0  429.84    5.82 
  -1   2   0  423.10    5.83 
   0  -2   0   48.58    0.68 
   0  -2   0   49.35    0.68 
   0  -2   0   47.60    0.68 
   0  -2   0   47.55    0.68 
   0   2   0   50.70    0.68 
   0   2   0   48.44    0.68 
   0   2   0   46.78    0.68 
   0   2   0   50.76    0.68 
   0   2   0   48.27    0.68 
   0   2   0   49.34    0.68 
  -1  -2   0  123.09    0.82 
  -1  -2   0  122.77    0.82 
  -1  -2   0  124.31    0.82 
  -1  -2   0  123.96    0.82 
   1   2   0  122.85    0.82 
   1   2   0  122.77    0.82 
   1   2   0  125.12    0.82 
   1   2   0  122.92    0.82 
   1   2   0  123.91    0.82 
   1   2   0  123.54    0.82 
  -2  -2   0    6.70    0.11 
  -2  -2   0    6.32    0.07 
  -2  -2   0    6.45    0.07 
  -2  -2   0    6.78    0.07 
  -2  -2   0    6.37    0.07 
  -2  -2   0    6.56    0.06 
   2   2   0    6.41    0.07 
   2   2   0    6.80    0.08 
   2   2   0    6.06    0.07 
   2   2   0    6.20    0.07 
  -3  -2   0    7.14    0.04 
  -3  -2   0    7.54    0.12 
  -3  -2   0    7.36    0.07 
  -3  -2   0    7.51    0.07 
  -3  -2   0    7.37    0.06 
  -3  -2   0    7.42    0.08 
   3   2   0    7.41    0.07 
   3   2   0    7.47    0.07 
   3   2   0    7.32    0.06 
   3   2   0    7.46    0.08 
  -4  -2   0   44.01    0.44 
  -4  -2   0   43.06    0.44 
  -4  -2   0   43.85    0.49 
  -4  -2   0   43.96    0.44 
  -4  -2   0   44.03    0.44 
  -4  -2   0   44.37    0.44 
   4   2   0   44.39    0.44 
   4   2   0   44.19    0.44 
   4   2   0   44.86    0.52 
   4   2   0   44.52    0.44 
   4   2   0   43.80    0.44 
  -5  -2   0    3.38    0.09 
  -5  -2   0    3.24    0.11 
  -5  -2   0    2.88    0.14 
  -5  -2   0    2.72    0.08 
  -5  -2   0    3.02    0.09 
  -5  -2   0    3.18    0.11 
   5   2   0    2.87    0.09 
   5   2   0    2.87    0.11 
   5   2   0    3.03    0.19 
   5   2   0    3.34    0.14 
  -6  -2   0   17.35    0.23 
  -6  -2   0   17.00    0.21 
  -6  -2   0   16.84    0.20 
  -6  -2   0   17.49    0.25 
   6   2   0   17.30    0.27 
   6   2   0   17.11    0.25 
   6   2   0   16.27    0.33 
   6   2   0   17.04    0.26 
  -7  -2   0    8.24    0.19 
  -7  -2   0    8.48    0.17 
  -7  -2   0    8.37    0.23 
   7   2   0    8.56    0.21 
   7   2   0    8.70    0.27 
   7   2   0    7.78    0.34 
  -8  -2   0    3.14    0.23 
  -8  -2   0    2.94    0.19 
   8   2   0    3.02    0.24 
   8   2   0    3.24    0.28 
   8   2   0    1.34    0.36 
   7  -3   0    2.60    0.37 
  -7   3   0    2.36    0.31 
  -7   3   0    2.58    0.23 
   6  -3   0    4.53    0.36 
  -6   3   0    4.79    0.22 
  -6   3   0    3.81    0.28 
   5  -3   0   18.87    0.26 
   5  -3   0   17.58    0.23 
   5  -3   0   17.10    0.23 
   5  -3   0   19.80    0.46 
  -5   3   0   19.49    0.32 
   4  -3   0    2.50    0.09 
   4  -3   0    2.29    0.08 
  -4   3   0    3.08    0.16 
  -4   3   0    3.03    0.14 
   3  -3   0    6.26    0.14 
   3  -3   0    5.95    0.15 
   3  -3   0    6.10    0.13 
   3  -3   0    5.18    0.16 
   3  -3   0    6.34    0.23 
  -3   3   0    6.59    0.17 
  -3   3   0    6.56    0.19 
   2  -3   0  179.54    1.89 
   2  -3   0  177.41    1.94 
   2  -3   0  171.44    1.90 
   2  -3   0  174.28    1.91 
   2  -3   0  173.71    1.90 
   2  -3   0  179.07    1.89 
  -2   3   0  179.55    1.91 
  -2   3   0  170.69    1.90 
   1  -3   0  244.87    2.26 
   1  -3   0  245.64    2.25 
   1  -3   0  246.98    2.25 
   1  -3   0  241.78    2.25 
   1  -3   0  246.99    2.25 
  -1   3   0  246.08    2.25 
  -1   3   0  241.42    2.25 
  -1   3   0  248.35    2.26 
  -1   3   0  242.49    2.26 
  -1   3   0  245.56    2.26 
   0  -3   0   66.87    1.18 
   0  -3   0   66.91    1.18 
   0  -3   0   66.12    1.18 
   0  -3   0   66.47    1.19 
   0   3   0   65.82    1.19 
   0   3   0   65.86    1.19 
   0   3   0   67.00    1.18 
   0   3   0   66.14    1.18 
  -1  -3   0   23.02    1.05 
  -1  -3   0   24.52    1.05 
  -1  -3   0   27.37    1.05 
   1   3   0   27.14    1.06 
   1   3   0   22.50    1.05 
  -2  -3   0   25.60    0.36 
  -2  -3   0   24.04    0.36 
  -2  -3   0   24.86    0.36 
  -2  -3   0   24.71    0.37 
  -2  -3   0   26.31    0.41 
   2   3   0   24.63    0.36 
   2   3   0   24.32    0.38 
   2   3   0   24.85    0.36 
   2   3   0   24.16    0.38 
   2   3   0   24.27    0.36 
   2   3   0   25.55    0.37 
  -3  -3   0   24.97    0.18 
  -3  -3   0   25.68    0.27 
  -3  -3   0   25.28    0.20 
  -3  -3   0   25.19    0.20 
  -3  -3   0   25.26    0.19 
  -3  -3   0   25.43    0.18 
   3   3   0   25.05    0.20 
   3   3   0   26.26    0.27 
   3   3   0   25.07    0.20 
   3   3   0   25.30    0.19 
   3   3   0   25.07    0.20 
  -4  -3   0    8.33    0.11 
  -4  -3   0    8.82    0.10 
  -4  -3   0    8.45    0.10 
  -4  -3   0    8.44    0.09 
  -4  -3   0    8.57    0.11 
  -4  -3   0    8.05    0.15 
   4   3   0    8.28    0.11 
   4   3   0    8.51    0.15 
   4   3   0    8.53    0.12 
   4   3   0    8.29    0.10 
   4   3   0    8.82    0.12 
  -5  -3   0   30.01    0.20 
  -5  -3   0   29.97    0.20 
  -5  -3   0   28.71    0.24 
  -5  -3   0   30.10    0.20 
   5   3   0   29.20    0.26 
   5   3   0   29.91    0.22 
   5   3   0   29.33    0.21 
   5   3   0   29.53    0.21 
  -6  -3   0    0.23    0.10 
  -6  -3   0    0.62    0.14 
  -6  -3   0    0.61    0.17 
  -6  -3   0    0.40    0.10 
  -6  -3   0    0.22    0.12 
   6   3   0    0.50    0.19 
   6   3   0    0.40    0.18 
   6   3   0    0.21    0.25 
   6   3   0    0.44    0.13 
  -7  -3   0   14.08    0.18 
  -7  -3   0   14.63    0.20 
  -7  -3   0   14.02    0.15 
   7   3   0   15.11    0.28 
   7   3   0   13.80    0.33 
   7   3   0   14.20    0.18 
  -8  -3   0    9.68    0.25 
   8   3   0   10.40    0.38 
   8   3   0   10.04    0.29 
   7  -4   0    0.95    0.38 
  -7   4   0    1.40    0.22 
  -7   4   0    1.20    0.25 
   6  -4   0    7.14    0.36 
   6  -4   0    6.75    0.19 
  -6   4   0    7.02    0.24 
  -6   4   0    6.68    0.27 
   5  -4   0    7.87    0.19 
   5  -4   0    8.12    0.18 
   5  -4   0    7.18    0.15 
   5  -4   0    8.29    0.34 
  -5   4   0    8.36    0.23 
  -5   4   0    7.82    0.24 
   4  -4   0    2.77    0.25 
   4  -4   0    2.00    0.10 
   4  -4   0    2.28    0.10 
   4  -4   0    3.03    0.12 
  -4   4   0    2.39    0.16 
  -4   4   0    2.74    0.19 
   3  -4   0   23.54    0.23 
   3  -4   0   22.81    0.23 
   3  -4   0   24.71    0.24 
   3  -4   0   23.96    0.37 
   3  -4   0   24.20    0.24 
  -3   4   0   23.77    0.27 
  -3   4   0   23.99    0.27 
   2  -4   0   46.84    0.40 
   2  -4   0   47.17    0.41 
   2  -4   0   47.34    0.41 
   2  -4   0   47.19    0.49 
   2  -4   0   47.14    0.43 
   2  -4   0   47.23    0.40 
  -2   4   0   46.74    0.42 
  -2   4   0   47.54    0.43 
   1  -4   0  115.71    1.13 
   1  -4   0  116.23    1.15 
   1  -4   0  118.93    1.15 
   1  -4   0  115.72    1.13 
   1  -4   0  116.39    1.13 
   1  -4   0  116.91    1.13 
  -1   4   0  117.63    1.15 
  -1   4   0  116.42    1.13 
  -1   4   0  114.92    1.13 
  -1   4   0  117.54    1.14 
  -1   4   0  115.19    1.14 
   0  -4   0   14.71    0.13 
   0  -4   0   14.83    0.13 
   0  -4   0   14.60    0.14 
   0  -4   0   14.53    0.12 
   0  -4   0   14.77    0.12 
   0   4   0   14.73    0.11 
   0   4   0   14.98    0.12 
   0   4   0   14.51    0.14 
   0   4   0   14.66    0.12 
   0   4   0   14.63    0.13 
   0   4   0   15.04    0.14 
   0   4   0   14.58    0.12 
  -1  -4   0    9.56    0.42 
  -1  -4   0    8.97    0.42 
  -1  -4   0    8.60    0.42 
  -1  -4   0    9.95    0.43 
  -1  -4   0    9.96    0.42 
  -1  -4   0    8.17    0.42 
   1   4   0   10.44    0.43 
   1   4   0    9.55    0.42 
   1   4   0   10.12    0.43 
   1   4   0    8.09    0.42 
   1   4   0    9.94    0.42 
  -2  -4   0   26.43    0.48 
  -2  -4   0   23.88    0.48 
   2   4   0   24.68    0.48 
   2   4   0   26.36    0.50 
   2   4   0   26.60    0.48 
   2   4   0   25.27    0.48 
   2   4   0   25.62    0.49 
  -3  -4   0    4.39    0.14 
  -3  -4   0    4.72    0.26 
  -3  -4   0    3.66    0.14 
  -3  -4   0    3.54    0.14 
  -3  -4   0    4.00    0.15 
   3   4   0    3.95    0.14 
   3   4   0    3.92    0.17 
   3   4   0    3.78    0.14 
   3   4   0    3.45    0.14 
   3   4   0    3.12    0.13 
   3   4   0    3.47    0.15 
  -4  -4   0   11.34    0.33 
  -4  -4   0   11.74    0.24 
  -4  -4   0   13.73    0.27 
  -4  -4   0   12.27    0.26 
  -4  -4   0   12.58    0.24 
  -4  -4   0   12.00    0.26 
   4   4   0   12.45    0.35 
   4   4   0   12.84    0.26 
   4   4   0   13.73    0.30 
   4   4   0   12.67    0.26 
   4   4   0   11.95    0.26 
   4   4   0   11.79    0.25 
  -5  -4   0    7.38    0.25 
  -5  -4   0    8.51    0.26 
  -5  -4   0    7.31    0.23 
  -5  -4   0    6.99    0.24 
   5   4   0    6.53    0.30 
   5   4   0    6.96    0.27 
   5   4   0    7.92    0.28 
   5   4   0    7.19    0.26 
  -6  -4   0   41.63    0.35 
  -6  -4   0   42.47    0.35 
   6   4   0   41.29    0.38 
   6   4   0   40.00    0.37 
   6   4   0   40.44    0.48 
   6   4   0   41.46    0.37 
  -7  -4   0    0.27    0.16 
  -7  -4   0    0.76    0.14 
  -7  -4   0    0.61    0.16 
   7   4   0   -0.88    0.29 
   7   4   0    0.77    0.25 
   7   4   0    1.03    0.28 
   7   4   0    0.55    0.16 
  -8  -4   0    5.37    0.20 
   8   4   0    5.91    0.32 
   8   4   0    5.02    0.19 
   8   4   0    5.03    0.29 
   6  -5   0    0.66    0.12 
   6  -5   0    0.91    0.33 
  -6   5   0    0.50    0.20 
  -6   5   0    0.28    0.28 
   5  -5   0    5.50    0.31 
   5  -5   0    5.61    0.12 
   5  -5   0    5.88    0.14 
  -5   5   0    6.17    0.22 
  -5   5   0    6.08    0.20 
   4  -5   0    6.38    0.13 
   4  -5   0    6.41    0.13 
   4  -5   0    6.51    0.14 
   4  -5   0    6.37    0.14 
   4  -5   0    6.28    0.29 
  -4   5   0    7.29    0.24 
  -4   5   0    7.41    0.20 
   3  -5   0   23.22    0.23 
   3  -5   0   24.09    0.24 
   3  -5   0   24.77    0.40 
   3  -5   0   24.35    0.24 
   3  -5   0   23.45    0.23 
  -3   5   0   24.67    0.28 
  -3   5   0   23.63    0.29 
   2  -5   0   17.67    0.11 
   2  -5   0   17.91    0.12 
   2  -5   0   17.20    0.10 
   2  -5   0   17.98    0.12 
  -2   5   0   17.80    0.14 
  -2   5   0   18.13    0.16 
   1  -5   0    2.32    0.16 
   1  -5   0    1.83    0.12 
   1  -5   0    2.13    0.13 
   1  -5   0    2.69    0.12 
   1  -5   0    1.77    0.12 
   1  -5   0    2.07    0.14 
  -1   5   0    2.14    0.12 
  -1   5   0    2.42    0.14 
  -1   5   0    2.37    0.11 
  -1   5   0    2.66    0.17 
   0  -5   0    1.60    0.06 
   0  -5   0    1.67    0.07 
   0  -5   0    1.60    0.08 
   0  -5   0    1.57    0.07 
   0  -5   0    1.60    0.08 
   0   5   0    1.69    0.07 
   0   5   0    1.82    0.07 
   0   5   0    1.58    0.06 
   0   5   0    1.67    0.08 
   0   5   0    1.71    0.06 
   0   5   0    1.41    0.10 
   0   5   0    1.56    0.08 
  -1  -5   0    4.55    0.22 
  -1  -5   0    3.70    0.20 
  -1  -5   0    4.10    0.20 
  -1  -5   0    3.18    0.21 
  -1  -5   0    4.28    0.22 
  -1  -5   0    4.81    0.21 
  -1  -5   0    3.69    0.21 
   1   5   0    4.12    0.23 
   1   5   0    4.02    0.21 
   1   5   0    4.06    0.23 
   1   5   0    3.59    0.20 
  -2  -5   0   22.01    0.51 
  -2  -5   0   22.20    0.51 
  -2  -5   0   20.79    0.50 
  -2  -5   0   20.70    0.51 
   2   5   0   22.22    0.52 
   2   5   0   20.84    0.52 
   2   5   0   22.00    0.51 
   2   5   0   22.27    0.51 
   2   5   0   20.03    0.51 
   2   5   0   21.16    0.51 
   2   5   0   21.56    0.53 
  -3  -5   0    4.02    0.14 
  -3  -5   0    3.73    0.18 
  -3  -5   0    4.53    0.16 
  -3  -5   0    3.64    0.14 
   3   5   0    3.51    0.15 
   3   5   0    3.82    0.14 
   3   5   0    3.83    0.16 
   3   5   0    4.09    0.14 
   3   5   0    3.73    0.14 
   3   5   0    3.22    0.12 
  -4  -5   0    7.51    0.16 
  -4  -5   0    6.64    0.20 
  -4  -5   0    7.98    0.18 
  -4  -5   0    7.32    0.17 
  -4  -5   0    7.79    0.15 
  -4  -5   0    7.75    0.17 
   4   5   0    7.83    0.19 
   4   5   0    7.74    0.21 
   4   5   0    8.26    0.19 
   4   5   0    7.33    0.20 
   4   5   0    7.79    0.18 
  -5  -5   0   20.89    0.29 
  -5  -5   0   20.86    0.26 
  -5  -5   0   21.85    0.32 
   5   5   0   21.43    0.29 
   5   5   0   21.76    0.40 
   5   5   0   20.87    0.40 
   5   5   0   20.58    0.31 
  -6  -5   0   63.57    0.67 
  -6  -5   0   64.79    0.65 
  -6  -5   0   65.02    0.64 
   6   5   0   63.54    0.66 
   6   5   0   65.51    0.74 
   6   5   0   63.27    0.75 
   6   5   0   63.97    0.67 
  -7  -5   0   18.79    0.28 
  -7  -5   0   18.09    0.22 
   7   5   0   16.80    0.36 
   7   5   0   18.35    0.39 
   7   5   0   18.49    0.26 
   7   5   0   18.79    0.30 
  -8  -5   0    2.25    0.22 
   8   5   0    2.83    0.31 
   8   5   0    2.20    0.26 
   8   5   0    0.59    0.38 
   6  -6   0    0.12    0.35 
  -6   6   0   -0.40    0.21 
  -6   6   0    0.29    0.24 
   5  -6   0    0.81    0.31 
   5  -6   0    0.65    0.13 
   5  -6   0    0.59    0.10 
  -5   6   0    0.57    0.19 
  -5   6   0    0.72    0.25 
   4  -6   0    0.30    0.25 
   4  -6   0    0.50    0.09 
   4  -6   0    0.14    0.09 
   4  -6   0    0.27    0.10 
  -4   6   0    0.59    0.18 
  -4   6   0    0.70    0.20 
   3  -6   0    0.87    0.08 
   3  -6   0    1.17    0.10 
   3  -6   0    0.86    0.23 
   3  -6   0    0.58    0.07 
   3  -6   0    1.05    0.10 
  -3   6   0    1.04    0.15 
  -3   6   0    1.18    0.17 
   2  -6   0    7.23    0.10 
   2  -6   0    6.66    0.09 
   2  -6   0    7.72    0.14 
   2  -6   0    7.11    0.10 
   2  -6   0    6.85    0.09 
  -2   6   0    7.27    0.15 
   1  -6   0    0.42    0.07 
   1  -6   0    0.31    0.06 
   1  -6   0    0.19    0.06 
   1  -6   0    0.62    0.10 
   1  -6   0    0.42    0.12 
   1  -6   0    0.31    0.07 
  -1   6   0    0.32    0.05 
  -1   6   0    0.44    0.12 
  -1   6   0    0.32    0.05 
  -1   6   0    0.22    0.10 
   0  -6   0   10.72    0.11 
   0  -6   0   11.24    0.11 
   0  -6   0   11.12    0.13 
   0  -6   0   11.76    0.12 
   0  -6   0   11.00    0.12 
   0  -6   0   11.07    0.10 
   0  -6   0   11.35    0.11 
   0   6   0   11.43    0.11 
   0   6   0   11.04    0.10 
   0   6   0   11.12    0.13 
   0   6   0   11.27    0.11 
   0   6   0   11.45    0.10 
   0   6   0   11.02    0.15 
  -1  -6   0    2.02    0.08 
  -1  -6   0    2.44    0.10 
  -1  -6   0    1.89    0.06 
  -1  -6   0    2.20    0.07 
  -1  -6   0    2.15    0.06 
  -1  -6   0    2.22    0.10 
  -1  -6   0    2.16    0.09 
   1   6   0    2.13    0.11 
   1   6   0    2.10    0.09 
   1   6   0    2.21    0.07 
   1   6   0    2.20    0.09 
   1   6   0    2.19    0.08 
   1   6   0    1.96    0.07 
   1   6   0    2.32    0.09 
  -2  -6   0   85.09    1.03 
  -2  -6   0   85.37    1.04 
  -2  -6   0   83.16    1.04 
  -2  -6   0   85.06    1.04 
   2   6   0   85.01    1.04 
   2   6   0   85.74    1.04 
   2   6   0   86.19    1.04 
   2   6   0   85.66    1.04 
   2   6   0   82.90    1.04 
   2   6   0   84.59    1.04 
   2   6   0   85.66    1.05 
   2   6   0   86.54    1.03 
  -3  -6   0   40.56    0.52 
  -3  -6   0   42.85    0.47 
  -3  -6   0   40.60    0.45 
  -3  -6   0   41.95    0.46 
  -3  -6   0   41.75    0.45 
   3   6   0   41.11    0.46 
   3   6   0   41.46    0.46 
   3   6   0   42.17    0.46 
   3   6   0   40.88    0.48 
   3   6   0   42.27    0.46 
   3   6   0   41.32    0.49 
  -4  -6   0   16.41    0.21 
  -4  -6   0   16.59    0.22 
  -4  -6   0   17.01    0.23 
  -4  -6   0   15.56    0.26 
   4   6   0   16.79    0.22 
   4   6   0   17.13    0.23 
   4   6   0   16.80    0.23 
   4   6   0   16.51    0.30 
  -5  -6   0    0.61    0.11 
  -5  -6   0    0.52    0.14 
  -5  -6   0    1.06    0.18 
   5   6   0    0.63    0.19 
   5   6   0    0.74    0.17 
   5   6   0    0.36    0.14 
   5   6   0    0.67    0.14 
  -6  -6   0   14.21    0.26 
  -6  -6   0   15.22    0.35 
  -6  -6   0   15.03    0.31 
   6   6   0   15.60    0.33 
   6   6   0   14.60    0.30 
   6   6   0   16.29    0.46 
  -7  -6   0   21.90    0.27 
  -7  -6   0   22.91    0.32 
   7   6   0   21.87    0.40 
   7   6   0   22.05    0.35 
   7   6   0   21.68    0.42 
   7   6   0   22.24    0.31 
  -8  -6   0    0.37    0.28 
   8   6   0    0.03    0.25 
   8   6   0   -0.95    0.37 
   8   6   0    1.32    0.29 
   8   6   0    0.85    0.22 
   5  -7   0    1.04    0.11 
   5  -7   0    1.36    0.33 
  -5   7   0    0.61    0.21 
   4  -7   0   -0.12    0.10 
   4  -7   0   -0.23    0.09 
   4  -7   0    0.02    0.29 
  -4   7   0    0.12    0.19 
   3  -7   0    0.23    0.09 
   3  -7   0    0.36    0.08 
   3  -7   0    0.40    0.25 
   3  -7   0    0.26    0.09 
   3  -7   0    0.74    0.15 
   3  -7   0    0.41    0.07 
  -3   7   0    0.64    0.17 
   2  -7   0    2.47    0.11 
   2  -7   0    2.98    0.12 
   2  -7   0    3.00    0.12 
   2  -7   0    2.65    0.12 
   2  -7   0    3.24    0.16 
  -2   7   0    2.93    0.17 
   1  -7   0    6.89    0.10 
   1  -7   0    6.81    0.10 
   1  -7   0    6.98    0.12 
   1  -7   0    6.80    0.09 
  -1   7   0    7.08    0.15 
  -1   7   0    6.81    0.13 
  -1   7   0    6.73    0.07 
   0  -7   0    0.51    0.11 
   0  -7   0    0.54    0.08 
   0  -7   0    0.46    0.09 
   0  -7   0    0.64    0.10 
   0  -7   0    1.10    0.10 
   0  -7   0    0.71    0.07 
   0   7   0    0.55    0.08 
   0   7   0    0.87    0.12 
   0   7   0    1.03    0.08 
   0   7   0    0.77    0.13 
   0   7   0    0.87    0.08 
  -1  -7   0    0.14    0.07 
  -1  -7   0    0.06    0.09 
  -1  -7   0    0.60    0.11 
  -1  -7   0    0.03    0.10 
  -1  -7   0    0.22    0.06 
  -1  -7   0    0.15    0.06 
  -1  -7   0    0.00    0.09 
   1   7   0    0.12    0.07 
   1   7   0    0.15    0.09 
   1   7   0   -0.04    0.11 
   1   7   0   -0.01    0.10 
   1   7   0   -0.05    0.09 
   1   7   0   -0.04    0.09 
   1   7   0    0.00    0.07 
  -2  -7   0    0.63    0.11 
  -2  -7   0    0.91    0.10 
  -2  -7   0    0.50    0.09 
  -2  -7   0    0.44    0.11 
   2   7   0    0.43    0.12 
   2   7   0    0.60    0.09 
   2   7   0    0.45    0.09 
   2   7   0    0.37    0.07 
   2   7   0    0.30    0.08 
   2   7   0    0.12    0.11 
   2   7   0    0.38    0.10 
  -3  -7   0   82.27    1.09 
  -3  -7   0   84.44    0.96 
  -3  -7   0   83.43    0.97 
  -3  -7   0   84.05    0.97 
   3   7   0   82.65    0.96 
   3   7   0   82.16    0.97 
   3   7   0   83.87    0.97 
   3   7   0   85.42    0.96 
   3   7   0   83.12    0.97 
   3   7   0   81.63    0.98 
  -4  -7   0   47.11    0.59 
  -4  -7   0   44.92    0.57 
  -4  -7   0   45.63    0.58 
   4   7   0   45.38    0.60 
   4   7   0   46.63    0.58 
   4   7   0   45.02    0.61 
   4   7   0   45.94    0.58 
  -5  -7   0   12.61    0.25 
  -5  -7   0   13.24    0.22 
  -5  -7   0   12.40    0.17 
   5   7   0   12.56    0.20 
   5   7   0   13.80    0.24 
   5   7   0   12.54    0.24 
   5   7   0   12.69    0.25 
  -6  -7   0    0.90    0.25 
  -6  -7   0    1.03    0.17 
  -6  -7   0    0.74    0.14 
   6   7   0    1.09    0.18 
   6   7   0    1.21    0.23 
   6   7   0    1.32    0.24 
  -7  -7   0    4.14    0.22 
   7   7   0    4.38    0.28 
   7   7   0    4.32    0.29 
   7   7   0    4.49    0.24 
  -8  -7   0    0.39    0.25 
   8   7   0    0.13    0.20 
   5  -8   0    0.39    0.37 
  -5   8   0    0.10    0.20 
   4  -8   0    3.64    0.15 
   4  -8   0    3.96    0.13 
   4  -8   0    4.08    0.36 
  -4   8   0    4.02    0.23 
   3  -8   0    5.66    0.16 
   3  -8   0    5.36    0.11 
   3  -8   0    5.47    0.28 
   3  -8   0    5.40    0.11 
  -3   8   0    5.19    0.17 
   2  -8   0    9.33    0.13 
   2  -8   0    8.74    0.12 
   2  -8   0    9.25    0.17 
   2  -8   0    9.09    0.13 
   2  -8   0    9.41    0.14 
  -2   8   0   10.12    0.20 
   1  -8   0    3.29    0.15 
   1  -8   0    2.62    0.14 
   1  -8   0    3.03    0.14 
   1  -8   0    3.04    0.16 
  -1   8   0    3.00    0.18 
  -1   8   0    2.85    0.21 
   0  -8   0   12.11    0.21 
   0  -8   0   11.26    0.23 
   0  -8   0   11.51    0.21 
   0  -8   0   12.38    0.20 
   0  -8   0   11.59    0.18 
   0  -8   0   12.02    0.20 
   0   8   0   11.69    0.18 
   0   8   0   12.30    0.21 
   0   8   0   11.77    0.17 
   0   8   0   11.96    0.23 
   0   8   0   11.58    0.17 
  -1  -8   0   11.71    0.22 
  -1  -8   0   11.12    0.20 
  -1  -8   0   11.33    0.20 
  -1  -8   0   10.91    0.18 
  -1  -8   0   10.84    0.18 
   1   8   0   11.09    0.20 
   1   8   0   11.05    0.18 
   1   8   0   11.14    0.19 
   1   8   0   10.98    0.18 
   1   8   0   11.48    0.23 
   1   8   0   11.17    0.19 
  -2  -8   0    1.88    0.12 
  -2  -8   0    1.85    0.09 
  -2  -8   0    1.77    0.13 
   2   8   0    1.54    0.08 
   2   8   0    1.81    0.14 
   2   8   0    1.73    0.09 
   2   8   0    1.49    0.11 
   2   8   0    1.75    0.10 
  -3  -8   0    1.63    0.13 
  -3  -8   0    1.16    0.15 
  -3  -8   0    1.10    0.14 
   3   8   0    0.89    0.12 
   3   8   0    0.93    0.16 
   3   8   0    1.38    0.15 
   3   8   0    0.80    0.12 
   3   8   0    0.76    0.15 
   3   8   0    1.15    0.17 
  -4  -8   0   18.44    0.34 
  -4  -8   0   19.50    0.35 
  -4  -8   0   19.28    0.35 
   4   8   0   17.78    0.34 
   4   8   0   18.78    0.37 
   4   8   0   18.19    0.38 
   4   8   0   20.29    0.37 
   4   8   0   18.83    0.38 
  -5  -8   0   39.65    0.40 
  -5  -8   0   37.68    0.44 
  -5  -8   0   38.20    0.44 
   5   8   0   39.20    0.43 
   5   8   0   38.56    0.42 
   5   8   0   38.18    0.39 
   5   8   0   39.26    0.48 
  -6  -8   0   11.90    0.21 
  -6  -8   0   12.07    0.25 
  -6  -8   0   11.52    0.32 
   6   8   0   12.02    0.29 
   6   8   0   12.47    0.31 
   6   8   0   11.94    0.26 
  -7  -8   0   -0.27    0.18 
   7   8   0   -0.05    0.23 
   7   8   0   -0.57    0.24 
  -8  -8   0    0.86    0.29 
   4  -9   0    1.64    0.35 
   4  -9   0    2.09    0.13 
  -4   9   0    1.73    0.24 
   3  -9   0    8.59    0.18 
   3  -9   0    8.88    0.16 
   3  -9   0    8.71    0.37 
  -3   9   0    9.50    0.27 
   2  -9   0    1.37    0.11 
   2  -9   0    1.34    0.11 
   2  -9   0    1.16    0.10 
   2  -9   0    1.48    0.14 
  -2   9   0    1.42    0.16 
   1  -9   0    2.77    0.18 
   1  -9   0    3.51    0.18 
   1  -9   0    4.13    0.17 
   1  -9   0    3.76    0.17 
   1  -9   0    3.05    0.15 
  -1   9   0    4.31    0.21 
  -1   9   0    4.20    0.25 
   0  -9   0   10.84    0.24 
   0  -9   0   10.65    0.27 
   0  -9   0   11.26    0.25 
   0  -9   0    9.86    0.28 
   0  -9   0   10.64    0.26 
   0   9   0   10.35    0.22 
   0   9   0   10.15    0.20 
   0   9   0   11.78    0.26 
   0   9   0   10.80    0.29 
   0   9   0   10.78    0.20 
  -1  -9   0   33.14    0.42 
  -1  -9   0   32.60    0.43 
  -1  -9   0   33.18    0.43 
  -1  -9   0   32.19    0.42 
   1   9   0   32.67    0.41 
   1   9   0   33.28    0.41 
   1   9   0   32.86    0.40 
   1   9   0   31.71    0.41 
   1   9   0   31.75    0.45 
   1   9   0   31.57    0.42 
  -2  -9   0   14.04    0.24 
  -2  -9   0   14.84    0.26 
  -2  -9   0   14.05    0.25 
   2   9   0   14.46    0.26 
   2   9   0   13.77    0.28 
   2   9   0   14.07    0.23 
   2   9   0   14.25    0.23 
  -3  -9   0    1.57    0.12 
  -3  -9   0    2.08    0.15 
  -3  -9   0    1.98    0.16 
   3   9   0    1.83    0.18 
   3   9   0    1.00    0.16 
   3   9   0    1.72    0.14 
  -4  -9   0    1.56    0.22 
  -4  -9   0    1.69    0.19 
  -4  -9   0    0.81    0.17 
   4   9   0    0.89    0.17 
   4   9   0    1.48    0.20 
   4   9   0    1.41    0.21 
  -5  -9   0   10.66    0.26 
  -5  -9   0   10.61    0.29 
   5   9   0   10.90    0.24 
   5   9   0   10.15    0.26 
   5   9   0   10.29    0.22 
  -6  -9   0    1.03    0.20 
   6   9   0    0.56    0.18 
   6   9   0    0.99    0.26 
   6   9   0    1.50    0.24 
  -7  -9   0    0.52    0.21 
   7   9   0    0.04    0.28 
   7   9   0    0.99    0.27 
   3 -10   0    3.40    0.13 
   3 -10   0    3.38    0.35 
  -3  10   0    3.62    0.25 
   2 -10   0    0.64    0.12 
   2 -10   0    0.43    0.12 
  -2  10   0    0.42    0.21 
   1 -10   0    0.97    0.11 
   1 -10   0    0.98    0.12 
   1 -10   0    1.14    0.12 
  -1  10   0    0.97    0.18 
  -1  10   0    1.05    0.23 
   0 -10   0    0.25    0.12 
   0 -10   0    0.03    0.14 
   0 -10   0    0.39    0.14 
   0 -10   0    0.16    0.12 
   0  10   0    0.25    0.08 
   0  10   0    0.26    0.16 
   0  10   0    0.25    0.20 
  -1 -10   0   40.24    0.51 
  -1 -10   0   40.50    0.49 
  -1 -10   0   40.13    0.48 
   1  10   0   39.46    0.47 
   1  10   0   40.88    0.49 
   1  10   0   38.95    0.47 
   1  10   0   39.50    0.47 
   1  10   0   40.32    0.53 
   1  10   0   39.38    0.46 
  -2 -10   0   17.21    0.31 
  -2 -10   0   18.02    0.31 
  -2 -10   0   17.87    0.30 
   2  10   0   17.82    0.27 
   2  10   0   16.59    0.27 
   2  10   0   17.97    0.33 
   2  10   0   17.85    0.30 
   2  10   0   17.45    0.26 
  -3 -10   0    1.88    0.18 
  -3 -10   0    1.90    0.20 
   3  10   0    2.03    0.17 
   3  10   0    1.77    0.21 
   3  10   0    0.83    0.16 
  -4 -10   0    2.68    0.20 
  -4 -10   0    2.84    0.17 
   4  10   0    2.90    0.19 
   4  10   0    2.67    0.20 
  -5 -10   0    0.16    0.23 
  -5 -10   0    0.04    0.18 
   5  10   0   -0.08    0.16 
   5  10   0    0.35    0.21 
   5  10   0   -0.39    0.17 
   5  10   0    0.22    0.22 
  -6 -10   0    5.10    0.32 
   6  10   0    5.01    0.23 
   6  10   0    4.23    0.25 
   6  10   0    4.07    0.27 
  -7 -10   0    2.51    0.24 
   7  10   0    2.47    0.24 
   3 -11   0    4.19    0.41 
   3 -11   0    4.60    0.14 
  -3  11   0    4.23    0.26 
   2 -11   0    2.46    0.14 
  -2  11   0    3.40    0.25 
   1 -11   0    1.43    0.16 
   1 -11   0    0.86    0.17 
  -1  11   0    1.07    0.20 
   0 -11   0    0.01    0.14 
   0 -11   0   -0.36    0.16 
   0  11   0   -0.24    0.23 
   0  11   0   -0.35    0.19 
  -1 -11   0   12.28    0.23 
  -1 -11   0   12.76    0.21 
   1  11   0   12.99    0.23 
   1  11   0   12.37    0.17 
   1  11   0   13.08    0.28 
  -2 -11   0    3.92    0.19 
  -2 -11   0    3.86    0.23 
   2  11   0    3.58    0.19 
   2  11   0    3.81    0.19 
   2  11   0    4.21    0.25 
  -3 -11   0    1.54    0.22 
  -3 -11   0    1.57    0.22 
   3  11   0    1.65    0.20 
   3  11   0    1.97    0.24 
  -4 -11   0    0.92    0.18 
  -4 -11   0    0.44    0.22 
   4  11   0    0.76    0.21 
  -5 -11   0   -0.03    0.18 
  -5 -11   0    0.11    0.24 
   5  11   0   -0.06    0.23 
  -6 -11   0    1.81    0.22 
   6  11   0    1.99    0.27 
   6  11   0    1.69    0.22 
  -7 -11   0    2.67    0.32 
   7  11   0    2.52    0.30 
   7  11   0    1.85    0.30 
   2 -12   0    2.28    0.18 
  -2  12   0    2.55    0.24 
   1 -12   0    3.30    0.18 
  -1  12   0    3.53    0.24 
   0 -12   0    7.41    0.18 
   0 -12   0    7.63    0.20 
   0  12   0    8.38    0.23 
   0  12   0    8.02    0.30 
  -1 -12   0    1.21    0.19 
  -1 -12   0    0.47    0.19 
   1  12   0    0.87    0.19 
   1  12   0    1.40    0.28 
  -2 -12   0   -0.23    0.20 
  -2 -12   0    0.04    0.18 
   2  12   0    0.26    0.24 
   2  12   0    0.54    0.18 
   2  12   0    0.18    0.16 
  -3 -12   0    0.45    0.23 
  -3 -12   0    0.74    0.17 
   3  12   0    0.86    0.20 
   3  12   0    1.21    0.27 
  -4 -12   0    0.64    0.18 
  -4 -12   0    0.68    0.28 
   4  12   0    0.56    0.22 
   4  12   0    0.11    0.25 
  -5 -12   0    0.12    0.24 
   5  12   0    0.38    0.25 
   6  12   0    0.06    0.27 
   0 -13   0    0.68    0.20 
   0  13   0    0.91    0.22 
   0  13   0    1.23    0.30 
  -1 -13   0    0.15    0.20 
  -1 -13   0    0.74    0.26 
   1  13   0    0.48    0.21 
   1  13   0    0.91    0.30 
  -2 -13   0   -0.31    0.23 
  -2 -13   0   -0.07    0.22 
   2  13   0   -0.11    0.20 
   2  13   0    0.43    0.28 
  -3 -13   0    0.34    0.25 
  -3 -13   0    0.67    0.18 
   3  13   0    1.30    0.29 
   3  13   0    0.10    0.19 
  -4 -13   0    2.54    0.21 
  -4 -13   0    2.43    0.24 
   4  13   0    3.08    0.29 
   4  13   0    2.72    0.23 
  -5 -13   0   -0.01    0.26 
   5  13   0    0.59    0.29 
   2  14   0    2.02    0.31 
   3  14   0    1.35    0.30 
   5  13  -1    0.45    0.28 
  -5 -13   1    0.59    0.23 
  -5 -13   1    0.59    0.27 
   4  13  -1    1.93    0.24 
   4  13  -1    2.08    0.31 
   3  13  -1   -0.11    0.19 
   3  13  -1    0.68    0.30 
  -3 -13   1    0.18    0.26 
   2  13  -1    0.70    0.20 
   2  13  -1    1.24    0.30 
  -2 -13   1    0.56    0.18 
  -2 -13   1    0.70    0.24 
   1  13  -1    2.29    0.23 
   1  13  -1    2.71    0.28 
  -1 -13   1    2.33    0.22 
  -1 -13   1    2.19    0.18 
   0  13  -1    4.54    0.26 
   0  13  -1    4.60    0.33 
   0 -13   1    4.06    0.22 
   6  12  -1    0.11    0.28 
   6  12  -1    0.15    0.23 
  -6 -12   1    0.02    0.25 
   5  12  -1   -0.27    0.26 
  -5 -12   1    0.08    0.22 
   4  12  -1    0.59    0.26 
  -4 -12   1    0.46    0.22 
  -4 -12   1    0.35    0.19 
   3  12  -1    2.72    0.28 
   3  12  -1    2.26    0.20 
  -3 -12   1    2.20    0.24 
  -3 -12   1    2.52    0.19 
   2  12  -1    1.52    0.17 
   2  12  -1    1.51    0.20 
   2  12  -1    1.57    0.27 
  -2 -12   1    1.01    0.19 
  -2 -12   1    0.91    0.22 
   1  12  -1    3.84    0.29 
   1  12  -1    3.25    0.20 
  -1 -12   1    3.61    0.21 
  -1 -12   1    3.49    0.19 
   0  12  -1    8.95    0.30 
   0  12  -1    8.78    0.24 
   0 -12   1    7.44    0.18 
   0 -12   1    8.38    0.20 
  -1  12  -1    6.12    0.26 
   1 -12   1    5.56    0.16 
   7  11  -1    5.79    0.30 
   6  11  -1    0.20    0.22 
   6  11  -1   -0.26    0.26 
  -6 -11   1   -0.15    0.22 
   5  11  -1    0.09    0.23 
   5  11  -1    0.53    0.18 
  -5 -11   1    0.11    0.20 
  -5 -11   1    0.15    0.29 
   4  11  -1    1.36    0.24 
  -4 -11   1    1.16    0.19 
  -4 -11   1    0.93    0.23 
   3  11  -1   11.17    0.28 
   3  11  -1   10.57    0.23 
  -3 -11   1   10.11    0.24 
  -3 -11   1   10.09    0.21 
   2  11  -1   13.35    0.30 
   2  11  -1   13.10    0.23 
   2  11  -1   14.17    0.25 
  -2 -11   1   13.02    0.27 
  -2 -11   1   12.57    0.24 
   1  11  -1    1.40    0.11 
   1  11  -1    2.13    0.24 
   1  11  -1    1.92    0.18 
  -1 -11   1    1.56    0.16 
  -1 -11   1    2.51    0.21 
  -1 -11   1    1.86    0.19 
   0  11  -1    1.99    0.19 
   0  11  -1    1.70    0.23 
   0 -11   1    1.76    0.17 
   0 -11   1    1.85    0.15 
  -1  11  -1    4.78    0.22 
  -1  11  -1    5.50    0.29 
   1 -11   1    4.66    0.16 
  -2  11  -1    1.99    0.24 
   2 -11   1    1.94    0.13 
   7  10  -1   -0.47    0.21 
   6  10  -1   10.96    0.29 
  -6 -10   1   10.80    0.39 
   5  10  -1   -0.09    0.23 
   5  10  -1    0.57    0.18 
  -5 -10   1    0.48    0.20 
  -5 -10   1    0.40    0.24 
   4  10  -1    1.12    0.23 
   4  10  -1    0.72    0.17 
   4  10  -1    0.26    0.19 
  -4 -10   1    0.87    0.21 
  -4 -10   1    0.87    0.18 
   3  10  -1    4.67    0.18 
   3  10  -1    4.73    0.23 
  -3 -10   1    5.23    0.20 
  -3 -10   1    4.93    0.19 
   2  10  -1   18.74    0.30 
   2  10  -1   17.04    0.22 
   2  10  -1   18.36    0.25 
   2  10  -1   18.45    0.24 
   2  10  -1   18.26    0.23 
   2  10  -1   17.69    0.22 
  -2 -10   1   19.16    0.28 
  -2 -10   1   18.26    0.25 
   1  10  -1   32.61    0.44 
   1  10  -1   30.95    0.38 
   1  10  -1   31.12    0.36 
   1  10  -1   31.12    0.38 
   1  10  -1   31.06    0.36 
   1  10  -1   30.46    0.34 
  -1 -10   1   31.00    0.38 
  -1 -10   1   31.79    0.40 
  -1 -10   1   31.38    0.41 
  -1 -10   1   32.30    0.38 
   0  10  -1    1.35    0.21 
   0  10  -1    0.82    0.17 
   0  10  -1    0.89    0.08 
   0 -10   1    0.88    0.11 
   0 -10   1    0.92    0.15 
   0 -10   1    1.02    0.13 
   0 -10   1    0.55    0.15 
  -1  10  -1   -0.20    0.22 
  -1  10  -1    0.15    0.19 
   1 -10   1    0.30    0.12 
   1 -10   1    0.15    0.13 
   1 -10   1    0.13    0.13 
  -2  10  -1   -0.07    0.20 
   2 -10   1    0.40    0.12 
   2 -10   1    0.42    0.12 
  -3  10  -1    0.93    0.24 
   3 -10   1    1.36    0.35 
   3 -10   1    1.48    0.11 
   7   9  -1   -0.21    0.26 
   7   9  -1    0.16    0.23 
  -7  -9   1   -0.14    0.22 
   6   9  -1    2.66    0.24 
   6   9  -1    1.95    0.23 
   6   9  -1    2.49    0.21 
  -6  -9   1    2.62    0.23 
  -6  -9   1    2.28    0.31 
   5   9  -1   16.55    0.33 
   5   9  -1   16.90    0.35 
   5   9  -1   15.64    0.28 
  -5  -9   1   15.69    0.31 
  -5  -9   1   17.41    0.33 
   4   9  -1   21.63    0.28 
   4   9  -1   20.85    0.28 
   4   9  -1   21.57    0.30 
   4   9  -1   21.60    0.30 
  -4  -9   1   23.02    0.30 
  -4  -9   1   21.28    0.28 
  -4  -9   1   23.77    0.35 
   3   9  -1    4.97    0.17 
   3   9  -1    5.56    0.19 
   3   9  -1    5.57    0.15 
  -3  -9   1    5.82    0.15 
  -3  -9   1    5.67    0.17 
  -3  -9   1    5.83    0.16 
   2   9  -1    7.94    0.17 
   2   9  -1    7.21    0.18 
   2   9  -1    8.22    0.19 
   2   9  -1    7.88    0.17 
   2   9  -1    7.68    0.18 
   2   9  -1    7.87    0.23 
  -2  -9   1    8.18    0.18 
  -2  -9   1    8.34    0.20 
  -2  -9   1    8.06    0.20 
  -2  -9   1    8.58    0.23 
   1   9  -1   53.23    0.49 
   1   9  -1   52.59    0.50 
   1   9  -1   53.67    0.49 
   1   9  -1   53.85    0.50 
   1   9  -1   52.23    0.52 
   1   9  -1   53.23    0.54 
  -1  -9   1   53.99    0.53 
  -1  -9   1   53.92    0.52 
  -1  -9   1   53.65    0.51 
  -1  -9   1   54.12    0.51 
   0   9  -1   20.90    0.38 
   0   9  -1   19.73    0.29 
   0   9  -1   21.90    0.33 
   0  -9   1   20.23    0.33 
   0  -9   1   20.19    0.35 
   0  -9   1   20.86    0.31 
   0  -9   1   20.90    0.33 
  -1   9  -1    5.78    0.24 
  -1   9  -1    5.20    0.20 
   1  -9   1    5.06    0.15 
   1  -9   1    5.10    0.19 
   1  -9   1    4.95    0.15 
   1  -9   1    5.33    0.14 
  -2   9  -1    0.67    0.17 
   2  -9   1    0.85    0.11 
   2  -9   1    0.51    0.16 
  -3   9  -1    5.43    0.23 
   3  -9   1    5.60    0.13 
   3  -9   1    5.78    0.34 
  -4   9  -1    1.43    0.25 
   4  -9   1    1.53    0.37 
   8   8  -1    0.78    0.30 
   8   8  -1   -0.14    0.28 
   8   8  -1    1.48    0.34 
  -8  -8   1    0.73    0.31 
   7   8  -1   -0.29    0.26 
   7   8  -1    0.17    0.22 
   7   8  -1    0.46    0.26 
  -7  -8   1    0.20    0.19 
   6   8  -1    6.48    0.22 
   6   8  -1    4.86    0.24 
   6   8  -1    6.32    0.26 
  -6  -8   1    5.75    0.21 
  -6  -8   1    5.26    0.30 
   5   8  -1   18.89    0.40 
   5   8  -1   18.21    0.33 
   5   8  -1   18.51    0.32 
   5   8  -1   17.53    0.33 
  -5  -8   1   17.44    0.26 
  -5  -8   1   18.30    0.35 
  -5  -8   1   18.71    0.32 
  -5  -8   1   17.62    0.32 
   4   8  -1   46.45    0.58 
   4   8  -1   45.73    0.57 
   4   8  -1   45.07    0.55 
  -4  -8   1   47.00    0.57 
  -4  -8   1   46.62    0.57 
  -4  -8   1   46.49    0.56 
   3   8  -1   19.25    0.25 
   3   8  -1   18.57    0.23 
   3   8  -1   19.07    0.22 
   3   8  -1   19.73    0.23 
  -3  -8   1   20.88    0.24 
  -3  -8   1   20.37    0.26 
   2   8  -1    9.36    0.13 
   2   8  -1    8.93    0.14 
   2   8  -1    9.18    0.17 
   2   8  -1    9.40    0.12 
  -2  -8   1    9.32    0.12 
  -2  -8   1    9.54    0.15 
  -2  -8   1    9.92    0.18 
  -2  -8   1    8.90    0.14 
   1   8  -1    8.98    0.20 
   1   8  -1    8.71    0.16 
   1   8  -1    8.29    0.14 
   1   8  -1    8.27    0.15 
   1   8  -1    8.66    0.15 
   1   8  -1    8.75    0.14 
  -1  -8   1    8.65    0.14 
  -1  -8   1    9.05    0.17 
  -1  -8   1    9.49    0.22 
  -1  -8   1    8.70    0.17 
   0   8  -1   18.38    0.20 
   0   8  -1   18.99    0.28 
   0   8  -1   19.94    0.23 
   0   8  -1   18.14    0.17 
   0  -8   1   18.85    0.21 
   0  -8   1   17.89    0.25 
   0  -8   1   18.58    0.20 
   0  -8   1   19.59    0.22 
   0  -8   1   17.48    0.23 
   0  -8   1   18.54    0.23 
  -1   8  -1    3.14    0.18 
  -1   8  -1    2.74    0.21 
   1  -8   1    3.02    0.14 
   1  -8   1    2.17    0.11 
   1  -8   1    2.79    0.13 
   1  -8   1    2.71    0.14 
   1  -8   1    2.91    0.17 
  -2   8  -1    5.15    0.19 
   2  -8   1    4.33    0.11 
   2  -8   1    4.65    0.12 
   2  -8   1    4.90    0.12 
   2  -8   1    5.32    0.18 
  -3   8  -1    1.55    0.19 
   3  -8   1    1.94    0.28 
   3  -8   1    2.01    0.17 
   3  -8   1    1.86    0.09 
   3  -8   1    1.70    0.11 
  -4   8  -1    4.58    0.23 
   4  -8   1    4.76    0.34 
  -5   8  -1    0.61    0.24 
   5  -8   1    1.46    0.38 
   8   7  -1    2.72    0.24 
   8   7  -1    2.27    0.28 
  -8  -7   1    2.63    0.24 
   7   7  -1    1.02    0.24 
   7   7  -1    0.42    0.22 
   7   7  -1    0.79    0.25 
  -7  -7   1    0.81    0.24 
   6   7  -1    4.95    0.22 
   6   7  -1    5.58    0.24 
   6   7  -1    5.36    0.18 
  -6  -7   1    5.04    0.27 
  -6  -7   1    4.95    0.13 
  -6  -7   1    5.22    0.19 
   5   7  -1    0.90    0.16 
   5   7  -1    0.93    0.17 
   5   7  -1    0.64    0.19 
   5   7  -1    0.70    0.19 
  -5  -7   1    0.44    0.20 
  -5  -7   1    0.82    0.15 
  -5  -7   1    0.66    0.17 
  -5  -7   1    0.53    0.10 
   4   7  -1   37.61    0.45 
   4   7  -1   38.05    0.46 
   4   7  -1   37.50    0.44 
   4   7  -1   36.96    0.48 
  -4  -7   1   37.22    0.43 
  -4  -7   1   37.19    0.46 
  -4  -7   1   37.46    0.44 
   3   7  -1   43.79    0.63 
   3   7  -1   44.52    0.62 
   3   7  -1   45.40    0.61 
   3   7  -1   44.37    0.61 
   3   7  -1   46.72    0.62 
  -3  -7   1   46.58    0.61 
  -3  -7   1   46.56    0.62 
  -3  -7   1   45.84    0.61 
   2   7  -1    0.87    0.09 
   2   7  -1    1.24    0.09 
   2   7  -1    1.04    0.13 
   2   7  -1    0.62    0.11 
   2   7  -1    0.93    0.09 
   2   7  -1    1.22    0.09 
   2   7  -1    1.24    0.09 
  -2  -7   1    0.88    0.10 
  -2  -7   1    1.00    0.08 
  -2  -7   1    1.40    0.13 
  -2  -7   1    1.25    0.10 
   1   7  -1   13.33    0.14 
   1   7  -1   13.23    0.16 
   1   7  -1   13.32    0.12 
   1   7  -1   13.16    0.13 
   1   7  -1   13.10    0.13 
   1   7  -1   13.35    0.14 
  -1  -7   1   13.55    0.14 
  -1  -7   1   14.12    0.19 
  -1  -7   1   13.10    0.12 
  -1  -7   1   13.36    0.13 
  -1  -7   1   13.37    0.14 
   0   7  -1   12.33    0.08 
   0   7  -1   12.39    0.06 
   0   7  -1   12.53    0.14 
   0   7  -1   12.29    0.07 
   0   7  -1   12.41    0.12 
   0  -7   1   12.76    0.08 
   0  -7   1   12.46    0.10 
   0  -7   1   12.17    0.09 
   0  -7   1   12.36    0.10 
   0  -7   1   12.14    0.12 
   0  -7   1   12.39    0.08 
  -1   7  -1    0.46    0.13 
  -1   7  -1    0.69    0.16 
  -1   7  -1    0.35    0.05 
   1  -7   1    0.50    0.08 
   1  -7   1    0.42    0.08 
   1  -7   1    0.53    0.12 
   1  -7   1    0.22    0.08 
  -2   7  -1   10.77    0.22 
   2  -7   1   10.02    0.16 
   2  -7   1    9.66    0.16 
   2  -7   1    9.81    0.16 
   2  -7   1    9.99    0.20 
   2  -7   1    9.78    0.15 
  -3   7  -1    6.61    0.20 
  -3   7  -1    7.14    0.21 
   3  -7   1    6.63    0.12 
   3  -7   1    6.09    0.11 
   3  -7   1    6.43    0.11 
   3  -7   1    6.85    0.30 
   3  -7   1    6.89    0.20 
  -4   7  -1    0.72    0.20 
  -4   7  -1    0.78    0.21 
   4  -7   1    0.68    0.32 
   4  -7   1    1.30    0.20 
  -5   7  -1    0.44    0.23 
  -5   7  -1    0.10    0.21 
   5  -7   1    0.98    0.34 
   8   6  -1   -0.96    0.36 
   8   6  -1    0.44    0.22 
  -8  -6   1    0.31    0.24 
   7   6  -1    9.58    0.38 
   7   6  -1    8.13    0.37 
   7   6  -1    8.44    0.33 
   7   6  -1    8.57    0.28 
  -7  -6   1    9.35    0.30 
  -7  -6   1    9.17    0.22 
   6   6  -1   25.70    0.49 
   6   6  -1   24.06    0.37 
   6   6  -1   25.16    0.40 
  -6  -6   1   23.32    0.30 
  -6  -6   1   25.56    0.43 
  -6  -6   1   24.32    0.33 
   5   6  -1   38.67    0.39 
   5   6  -1   37.58    0.38 
   5   6  -1   37.01    0.35 
   5   6  -1   38.03    0.44 
  -5  -6   1   37.72    0.31 
  -5  -6   1   38.69    0.36 
  -5  -6   1   38.61    0.39 
   4   6  -1    1.52    0.14 
   4   6  -1    0.96    0.15 
   4   6  -1    0.99    0.16 
   4   6  -1    1.22    0.13 
  -4  -6   1    1.40    0.13 
  -4  -6   1    1.42    0.15 
  -4  -6   1    1.15    0.16 
   3   6  -1   32.75    0.52 
   3   6  -1   34.66    0.51 
   3   6  -1   34.27    0.52 
   3   6  -1   32.81    0.51 
   3   6  -1   33.15    0.54 
   3   6  -1   34.01    0.52 
  -3  -6   1   32.24    0.57 
  -3  -6   1   34.56    0.52 
  -3  -6   1   34.83    0.52 
  -3  -6   1   34.61    0.51 
   2   6  -1   73.09    0.84 
   2   6  -1   72.06    0.86 
   2   6  -1   72.17    0.84 
   2   6  -1   73.32    0.84 
   2   6  -1   72.63    0.86 
   2   6  -1   71.41    0.84 
  -2  -6   1   73.13    0.84 
  -2  -6   1   71.09    0.84 
  -2  -6   1   71.90    0.84 
  -2  -6   1   73.04    0.86 
  -2  -6   1   73.53    0.84 
   1   6  -1   20.07    0.15 
   1   6  -1   19.92    0.12 
   1   6  -1   20.60    0.14 
   1   6  -1   19.53    0.11 
   1   6  -1   19.91    0.16 
   1   6  -1   20.85    0.14 
  -1  -6   1   20.62    0.18 
  -1  -6   1   20.64    0.14 
  -1  -6   1   20.85    0.12 
  -1  -6   1   20.14    0.13 
  -1  -6   1   19.93    0.12 
   0   6  -1   14.17    0.21 
   0   6  -1   13.32    0.16 
   0   6  -1   14.20    0.23 
   0   6  -1   14.39    0.18 
   0   6  -1   13.57    0.17 
   0   6  -1   13.69    0.19 
   0   6  -1   14.44    0.17 
   0  -6   1   13.54    0.22 
   0  -6   1   14.25    0.18 
   0  -6   1   14.64    0.19 
   0  -6   1   13.32    0.18 
   0  -6   1   14.26    0.21 
  -1   6  -1    4.29    0.05 
  -1   6  -1    4.09    0.11 
  -1   6  -1    4.27    0.13 
  -1   6  -1    4.43    0.05 
   1  -6   1    4.29    0.08 
   1  -6   1    4.20    0.07 
   1  -6   1    4.44    0.07 
   1  -6   1    4.56    0.11 
  -2   6  -1    2.80    0.15 
  -2   6  -1    2.56    0.15 
   2  -6   1    2.91    0.10 
   2  -6   1    3.01    0.10 
   2  -6   1    3.03    0.15 
   2  -6   1    2.81    0.10 
   2  -6   1    2.41    0.09 
  -3   6  -1   10.12    0.22 
  -3   6  -1   11.29    0.22 
   3  -6   1   10.37    0.22 
   3  -6   1    9.89    0.14 
   3  -6   1    9.95    0.15 
   3  -6   1   10.28    0.29 
   3  -6   1   10.11    0.14 
   3  -6   1   10.01    0.13 
  -4   6  -1    5.83    0.24 
  -4   6  -1    6.56    0.24 
   4  -6   1    5.69    0.32 
  -5   6  -1    3.08    0.21 
  -5   6  -1    2.38    0.23 
   5  -6   1    2.66    0.32 
  -6   6  -1   -0.17    0.22 
  -6   6  -1   -0.41    0.24 
   6  -6   1    0.20    0.35 
   8   5  -1    3.16    0.24 
   8   5  -1    1.60    0.36 
   8   5  -1    3.86    0.31 
  -8  -5   1    3.35    0.18 
  -8  -5   1    2.84    0.23 
   7   5  -1    0.59    0.24 
   7   5  -1   -0.10    0.32 
   7   5  -1    0.98    0.21 
   7   5  -1    1.22    0.26 
  -7  -5   1    0.54    0.18 
  -7  -5   1    0.48    0.15 
   6   5  -1   15.00    0.40 
   6   5  -1   14.91    0.38 
   6   5  -1   14.33    0.53 
  -6  -5   1   12.88    0.40 
  -6  -5   1   15.47    0.37 
  -6  -5   1   14.21    0.34 
   5   5  -1   33.44    0.45 
   5   5  -1   32.30    0.53 
   5   5  -1   32.24    0.45 
   5   5  -1   33.39    0.43 
  -5  -5   1   33.58    0.45 
  -5  -5   1   33.06    0.41 
  -5  -5   1   33.60    0.44 
   4   5  -1   17.18    0.24 
   4   5  -1   17.66    0.24 
   4   5  -1   17.83    0.24 
  -4  -5   1   17.66    0.24 
  -4  -5   1   17.45    0.25 
  -4  -5   1   17.09    0.20 
  -4  -5   1   17.24    0.24 
   3   5  -1   10.24    0.25 
   3   5  -1   10.87    0.23 
   3   5  -1   11.44    0.23 
   3   5  -1   11.53    0.23 
   3   5  -1   11.14    0.23 
   3   5  -1   10.95    0.27 
  -3  -5   1   11.32    0.23 
  -3  -5   1   11.34    0.32 
  -3  -5   1   11.69    0.24 
  -3  -5   1   11.20    0.22 
  -3  -5   1   10.96    0.23 
  -2  -5   1   16.83    0.70 
   1   5  -1    7.87    0.25 
   1   5  -1    7.91    0.22 
  -1  -5   1    7.02    0.22 
  -1  -5   1    7.78    0.21 
  -1  -5   1    9.00    0.25 
  -1  -5   1    8.36    0.22 
  -1  -5   1    8.43    0.22 
   0   5  -1   17.64    0.13 
   0   5  -1   17.58    0.12 
   0   5  -1   18.12    0.16 
   0   5  -1   17.11    0.18 
   0   5  -1   16.86    0.13 
   0   5  -1   16.89    0.16 
   0   5  -1   17.03    0.13 
   0  -5   1   17.12    0.12 
   0  -5   1   17.30    0.15 
   0  -5   1   17.19    0.12 
   0  -5   1   16.97    0.13 
   0  -5   1   17.85    0.14 
   0  -5   1   17.14    0.15 
  -1   5  -1    5.21    0.17 
  -1   5  -1    4.40    0.16 
  -1   5  -1    3.88    0.12 
  -1   5  -1    4.20    0.12 
  -1   5  -1    4.20    0.17 
   1  -5   1    4.11    0.14 
   1  -5   1    4.76    0.19 
   1  -5   1    4.87    0.14 
   1  -5   1    4.34    0.13 
   1  -5   1    3.99    0.16 
  -2   5  -1    0.86    0.12 
  -2   5  -1    0.83    0.11 
   2  -5   1    0.81    0.05 
   2  -5   1    0.45    0.06 
   2  -5   1    1.03    0.06 
   2  -5   1    1.06    0.12 
   2  -5   1    0.46    0.06 
  -3   5  -1   29.87    0.29 
  -3   5  -1   29.47    0.30 
   3  -5   1   29.89    0.41 
   3  -5   1   28.40    0.23 
   3  -5   1   27.63    0.22 
   3  -5   1   29.34    0.24 
  -4   5  -1   17.42    0.26 
  -4   5  -1   17.53    0.28 
   4  -5   1   17.02    0.21 
   4  -5   1   16.50    0.20 
   4  -5   1   16.76    0.20 
   4  -5   1   15.86    0.19 
   4  -5   1   16.92    0.37 
  -5   5  -1   13.90    0.32 
  -5   5  -1   13.55    0.25 
   5  -5   1   12.37    0.36 
   5  -5   1   12.31    0.16 
  -6   5  -1    1.78    0.29 
  -6   5  -1    1.82    0.21 
   6  -5   1    1.57    0.33 
   6  -5   1    1.50    0.10 
   8   4  -1    0.83    0.23 
  -8  -4   1    0.54    0.16 
   7   4  -1   -0.20    0.23 
   7   4  -1   -0.52    0.30 
   7   4  -1   -0.03    0.18 
  -7  -4   1    0.28    0.16 
  -7  -4   1    0.24    0.12 
  -7  -4   1    0.21    0.14 
   6   4  -1    2.36    0.20 
   6   4  -1    1.78    0.26 
   6   4  -1    2.62    0.19 
   6   4  -1    2.24    0.16 
  -6  -4   1    1.78    0.12 
  -6  -4   1    2.11    0.16 
  -6  -4   1    1.25    0.14 
   5   4  -1   21.74    0.32 
   5   4  -1   21.25    0.31 
   5   4  -1   20.85    0.41 
   5   4  -1   21.68    0.31 
  -5  -4   1   21.48    0.27 
  -5  -4   1   22.13    0.30 
  -5  -4   1   21.82    0.31 
  -5  -4   1   21.26    0.29 
   4   4  -1   66.56    0.62 
   4   4  -1   64.98    0.61 
   4   4  -1   65.02    0.62 
   4   4  -1   65.18    0.64 
   4   4  -1   64.54    0.61 
   4   4  -1   63.85    0.67 
  -4  -4   1   64.81    0.61 
  -4  -4   1   62.68    0.66 
  -4  -4   1   66.01    0.62 
  -4  -4   1   65.95    0.59 
  -4  -4   1   65.18    0.61 
  -4  -4   1   65.12    0.61 
   3   4  -1    9.18    0.18 
   3   4  -1    8.97    0.17 
   3   4  -1    9.20    0.16 
   3   4  -1    8.57    0.16 
   3   4  -1    9.01    0.19 
  -3  -4   1    8.72    0.16 
  -3  -4   1    9.22    0.17 
  -3  -4   1    9.47    0.17 
  -3  -4   1    8.70    0.16 
  -3  -4   1    8.73    0.20 
  -2  -4   1   12.09    0.52 
  -2  -4   1   11.94    0.50 
   1   4  -1   51.17    0.80 
   1   4  -1   48.30    0.80 
   1   4  -1   53.34    0.82 
   1   4  -1   52.74    0.81 
   1   4  -1   53.27    0.80 
   1   4  -1   49.88    0.80 
  -1  -4   1   50.48    0.80 
  -1  -4   1   51.23    0.80 
  -1  -4   1   50.57    0.80 
  -1  -4   1   48.21    0.80 
  -1  -4   1   52.80    0.81 
   0   4  -1    1.58    0.08 
   0   4  -1    1.88    0.06 
   0   4  -1    1.90    0.06 
   0   4  -1    1.83    0.10 
   0   4  -1    1.47    0.06 
   0   4  -1    1.97    0.10 
   0  -4   1    1.99    0.07 
   0  -4   1    1.95    0.06 
   0  -4   1    1.43    0.09 
   0  -4   1    1.72    0.09 
  -1   4  -1  118.31    1.11 
  -1   4  -1  118.60    1.12 
  -1   4  -1  115.67    1.11 
   1  -4   1  118.58    1.10 
   1  -4   1  117.49    1.10 
   1  -4   1  116.92    1.10 
   1  -4   1  120.41    1.12 
   1  -4   1  116.33    1.10 
   1  -4   1  118.02    1.12 
  -2   4  -1    9.15    0.26 
  -2   4  -1    8.80    0.26 
   2  -4   1    7.82    0.22 
   2  -4   1    7.87    0.22 
   2  -4   1    7.69    0.26 
  -3   4  -1    3.16    0.19 
  -3   4  -1    2.54    0.19 
   3  -4   1    2.71    0.14 
   3  -4   1    2.34    0.14 
   3  -4   1    2.43    0.24 
  -4   4  -1    1.74    0.19 
  -4   4  -1    1.27    0.15 
   4  -4   1    2.19    0.13 
   4  -4   1    1.76    0.26 
   4  -4   1    2.13    0.13 
   4  -4   1    1.73    0.11 
  -5   4  -1   11.96    0.25 
  -5   4  -1   11.72    0.28 
   5  -4   1   11.99    0.22 
   5  -4   1   11.49    0.20 
   5  -4   1   11.68    0.22 
   5  -4   1   11.24    0.36 
  -6   4  -1    4.87    0.21 
  -6   4  -1    5.45    0.27 
   6  -4   1    5.20    0.34 
   6  -4   1    5.07    0.15 
  -7   4  -1    1.78    0.22 
  -7   4  -1    2.02    0.28 
   7  -4   1    2.18    0.38 
   8   3  -1    4.52    0.24 
  -8  -3   1    4.60    0.23 
  -8  -3   1    4.49    0.23 
   7   3  -1    4.11    0.26 
   7   3  -1    2.47    0.33 
   7   3  -1    3.50    0.20 
  -7  -3   1    3.53    0.19 
  -7  -3   1    3.51    0.15 
  -7  -3   1    3.64    0.19 
   6   3  -1    9.36    0.18 
   6   3  -1    9.90    0.20 
   6   3  -1    8.78    0.27 
   6   3  -1    9.47    0.21 
  -6  -3   1    9.54    0.16 
  -6  -3   1    9.58    0.21 
  -6  -3   1    9.50    0.16 
  -6  -3   1    9.26    0.14 
   5   3  -1    0.52    0.13 
   5   3  -1    0.43    0.12 
   5   3  -1    0.34    0.19 
   5   3  -1    0.83    0.12 
  -5  -3   1    0.88    0.10 
  -5  -3   1    0.47    0.10 
  -5  -3   1   -0.01    0.07 
  -5  -3   1    0.87    0.12 
   4   3  -1    2.17    0.18 
   4   3  -1    2.78    0.14 
   4   3  -1    2.37    0.13 
   4   3  -1    2.62    0.14 
   4   3  -1    2.69    0.16 
   4   3  -1    2.76    0.13 
  -4  -3   1    2.56    0.13 
  -4  -3   1    2.65    0.11 
  -4  -3   1    2.50    0.12 
  -4  -3   1    2.10    0.12 
  -4  -3   1    2.51    0.14 
  -4  -3   1    2.13    0.17 
   3   3  -1   16.61    0.21 
   3   3  -1   14.89    0.20 
   3   3  -1   14.95    0.20 
   3   3  -1   14.74    0.24 
   3   3  -1   15.68    0.20 
   3   3  -1   16.05    0.29 
  -3  -3   1   14.87    0.20 
  -3  -3   1   16.09    0.19 
  -3  -3   1   15.72    0.18 
  -3  -3   1   15.26    0.21 
  -3  -3   1   15.52    0.28 
  -3  -3   1   15.47    0.20 
   2   3  -1    0.63    0.07 
   2   3  -1    0.94    0.08 
   2   3  -1    0.97    0.11 
   2   3  -1    1.27    0.08 
   2   3  -1    0.99    0.07 
  -2  -3   1    0.99    0.08 
  -2  -3   1    1.00    0.07 
  -2  -3   1    1.21    0.12 
  -2  -3   1    1.21    0.07 
  -2  -3   1    0.99    0.08 
   1   3  -1   10.84    0.20 
   1   3  -1   10.09    0.17 
   1   3  -1   10.36    0.16 
   1   3  -1   10.13    0.16 
  -1  -3   1   10.86    0.19 
  -1  -3   1   10.63    0.17 
  -1  -3   1   10.32    0.16 
  -1  -3   1   10.26    0.17 
  -1  -3   1   10.32    0.16 
   0   3  -1  104.02    1.15 
   0   3  -1  103.33    1.15 
   0   3  -1  108.76    1.15 
   0   3  -1  104.72    1.16 
   0   3  -1  105.99    1.15 
   0   3  -1  107.42    1.16 
   0   3  -1  108.39    1.17 
   0   3  -1  108.24    1.15 
   0  -3   1  108.43    1.16 
   0  -3   1  107.72    1.15 
   0  -3   1  108.08    1.16 
   0  -3   1  106.60    1.15 
   0  -3   1  103.39    1.15 
  -1   3  -1  157.08    1.73 
  -1   3  -1  156.94    1.73 
  -1   3  -1  150.45    1.73 
   1  -3   1  159.04    1.73 
   1  -3   1  154.64    1.72 
   1  -3   1  156.80    1.73 
   1  -3   1  156.44    1.72 
  -2   3  -1  419.51    3.93 
  -2   3  -1  420.81    3.93 
   2  -3   1  416.77    3.94 
  -3   3  -1   45.43    0.68 
  -3   3  -1   44.96    0.67 
   3  -3   1   42.82    0.65 
   3  -3   1   44.53    0.74 
   3  -3   1   45.84    0.65 
   3  -3   1   42.68    0.68 
  -4   3  -1    6.24    0.15 
  -4   3  -1    6.00    0.17 
   4  -3   1    5.67    0.09 
   4  -3   1    6.34    0.23 
   4  -3   1    5.95    0.10 
   4  -3   1    6.02    0.11 
  -5   3  -1    2.48    0.18 
  -5   3  -1    1.95    0.22 
   5  -3   1    1.47    0.11 
   5  -3   1    2.72    0.17 
   5  -3   1    1.23    0.12 
   5  -3   1    2.32    0.29 
  -6   3  -1    9.95    0.27 
  -6   3  -1   10.47    0.23 
   6  -3   1   10.25    0.34 
  -7   3  -1    0.32    0.23 
  -7   3  -1    0.25    0.30 
   7  -3   1    0.15    0.34 
   8   2  -1    0.57    0.21 
  -8  -2   1    0.84    0.16 
  -8  -2   1    0.18    0.19 
   7   2  -1    1.03    0.32 
   7   2  -1    1.31    0.18 
   7   2  -1    2.38    0.26 
  -7  -2   1    2.11    0.20 
  -7  -2   1    1.79    0.16 
  -7  -2   1    2.10    0.16 
   6   2  -1    4.77    0.25 
   6   2  -1    5.24    0.29 
   6   2  -1    5.52    0.29 
   6   2  -1    5.08    0.37 
  -6  -2   1    5.06    0.24 
  -6  -2   1    5.88    0.26 
  -6  -2   1    5.00    0.27 
  -6  -2   1    4.68    0.23 
  -6  -2   1    4.87    0.23 
   5   2  -1    9.37    0.15 
   5   2  -1    9.81    0.15 
   5   2  -1   10.35    0.17 
   5   2  -1    9.76    0.24 
  -5  -2   1   10.02    0.15 
  -5  -2   1    9.61    0.14 
  -5  -2   1   10.19    0.17 
  -5  -2   1   10.06    0.15 
   4   2  -1    4.33    0.16 
   4   2  -1    4.26    0.15 
   4   2  -1    4.81    0.22 
   4   2  -1    4.26    0.21 
   4   2  -1    3.78    0.14 
   4   2  -1    4.18    0.16 
  -4  -2   1    4.13    0.15 
  -4  -2   1    4.59    0.14 
  -4  -2   1    4.25    0.15 
  -4  -2   1    4.13    0.15 
  -4  -2   1    4.08    0.19 
   3   2  -1    2.17    0.14 
   3   2  -1    2.88    0.13 
   3   2  -1    2.25    0.11 
   3   2  -1    2.16    0.11 
   3   2  -1    2.28    0.14 
   3   2  -1    2.53    0.12 
  -3  -2   1    2.81    0.12 
  -3  -2   1    2.58    0.10 
  -3  -2   1    2.30    0.16 
  -3  -2   1    2.33    0.11 
  -3  -2   1    2.80    0.12 
  -3  -2   1    2.30    0.11 
   2   2  -1    2.61    0.16 
   2   2  -1    2.74    0.19 
   2   2  -1    2.72    0.15 
   2   2  -1    2.98    0.16 
  -2  -2   1    2.35    0.16 
  -2  -2   1    3.56    0.16 
  -2  -2   1    3.10    0.16 
   1   2  -1   25.10    1.11 
  -1  -2   1   26.05    1.13 
  -1  -2   1   21.91    1.11 
  -1  -2   1   20.73    1.12 
  -1  -2   1   25.56    1.11 
   0   2  -1  252.33    3.39 
   0   2  -1  268.62    3.39 
   0   2  -1  262.06    3.40 
   0   2  -1  268.50    3.39 
   0   2  -1  254.76    3.39 
   0   2  -1  256.06    3.40 
   0  -2   1  263.03    3.40 
   0  -2   1  252.64    3.39 
   0  -2   1  257.15    3.40 
   0  -2   1  263.59    3.39 
   0  -2   1  267.53    3.39 
   0  -2   1  250.56    3.39 
  -1   2  -1    2.49    0.13 
  -1   2  -1    1.84    0.13 
  -1   2  -1    2.29    0.14 
   1  -2   1    2.12    0.13 
  -2   2  -1  260.30    2.51 
   2  -2   1  259.32    2.51 
   2  -2   1  255.89    2.53 
  -3   2  -1   44.65    0.66 
  -3   2  -1   43.44    0.65 
   3  -2   1   44.08    0.64 
   3  -2   1   44.27    0.70 
   3  -2   1   43.70    0.64 
   3  -2   1   44.60    0.64 
   3  -2   1   42.89    0.64 
  -4   2  -1    8.16    0.21 
  -4   2  -1    8.40    0.24 
   4  -2   1    8.00    0.19 
   4  -2   1    8.28    0.19 
   4  -2   1    7.53    0.19 
   4  -2   1    8.00    0.20 
   4  -2   1    8.23    0.33 
  -5   2  -1    1.64    0.16 
  -5   2  -1    1.90    0.14 
   5  -2   1    2.01    0.13 
   5  -2   1    2.27    0.12 
   5  -2   1    1.55    0.08 
   5  -2   1    2.32    0.23 
   5  -2   1    1.61    0.08 
  -6   2  -1   12.67    0.27 
  -6   2  -1   12.85    0.22 
   6  -2   1   12.61    0.21 
   6  -2   1   12.70    0.24 
   6  -2   1   12.63    0.34 
  -7   2  -1    0.89    0.19 
  -7   2  -1    1.64    0.25 
   7  -2   1    1.20    0.33 
   8   1  -1   -0.16    0.19 
  -8  -1   1    0.63    0.23 
  -8  -1   1    0.02    0.16 
   7   1  -1    1.50    0.16 
   7   1  -1    2.15    0.23 
   7   1  -1    1.77    0.33 
  -7  -1   1    2.03    0.15 
  -7  -1   1    1.85    0.19 
   6   1  -1    5.33    0.19 
   6   1  -1    5.44    0.28 
   6   1  -1    5.11    0.18 
   6   1  -1    5.20    0.16 
  -6  -1   1    5.27    0.19 
  -6  -1   1    5.07    0.17 
  -6  -1   1    5.36    0.15 
  -6  -1   1    5.17    0.13 
  -6  -1   1    4.96    0.11 
   5   1  -1    3.02    0.14 
   5   1  -1    3.27    0.23 
   5   1  -1    3.70    0.16 
   5   1  -1    3.13    0.14 
  -5  -1   1    3.35    0.16 
  -5  -1   1    3.72    0.13 
  -5  -1   1    3.22    0.14 
  -5  -1   1    3.32    0.13 
  -5  -1   1    3.10    0.12 
   4   1  -1    4.06    0.10 
   4   1  -1    4.11    0.15 
   4   1  -1    4.03    0.07 
   4   1  -1    4.02    0.08 
   4   1  -1    3.79    0.07 
  -4  -1   1    4.08    0.08 
  -4  -1   1    3.89    0.08 
  -4  -1   1    3.88    0.08 
  -4  -1   1    3.92    0.07 
  -4  -1   1    4.10    0.12 
  -4  -1   1    3.70    0.07 
   3   1  -1   10.76    0.22 
   3   1  -1   10.49    0.22 
   3   1  -1   11.36    0.30 
   3   1  -1   11.34    0.22 
   3   1  -1   11.08    0.22 
  -3  -1   1   10.47    0.21 
  -3  -1   1   11.30    0.28 
  -3  -1   1   11.69    0.22 
  -3  -1   1   11.48    0.21 
  -3  -1   1   10.81    0.21 
   2   1  -1   92.65    0.44 
   2   1  -1   92.12    0.45 
   2   1  -1   93.02    0.44 
   2   1  -1   92.37    0.43 
   2   1  -1   93.36    0.48 
  -2  -1   1   92.40    0.43 
  -2  -1   1   92.34    0.47 
  -2  -1   1   92.91    0.44 
  -2  -1   1   92.83    0.43 
   1   1  -1   26.20    0.70 
   1   1  -1   24.83    0.68 
   1   1  -1   25.45    0.68 
  -1  -1   1   24.23    0.68 
  -1  -1   1   23.24    0.69 
  -1  -1   1   23.63    0.68 
  -1  -1   1   23.43    0.68 
   0   1  -1    4.06    0.03 
   0   1  -1    4.22    0.03 
   0   1  -1    4.08    0.02 
   0   1  -1    4.06    0.02 
   0   1  -1    4.08    0.02 
   0   1  -1    4.06    0.02 
   0   1  -1    4.01    0.02 
   0  -1   1    4.05    0.01 
   0  -1   1    4.01    0.01 
   0  -1   1    4.03    0.02 
   0  -1   1    4.24    0.02 
   0  -1   1    3.99    0.03 
   0  -1   1    4.01    0.01 
  -1   1  -1  673.15    6.31 
   1  -1   1  647.40    6.31 
  -2   1  -1    9.55    0.14 
   2  -1   1    9.34    0.20 
   2  -1   1    9.07    0.13 
   2  -1   1    9.09    0.13 
  -3   1  -1   37.36    0.41 
  -3   1  -1   36.81    0.38 
  -3   1  -1   36.53    0.38 
  -3   1  -1   35.60    0.39 
   3  -1   1   37.20    0.39 
   3  -1   1   36.95    0.39 
   3  -1   1   36.83    0.39 
   3  -1   1   37.14    0.46 
   3  -1   1   37.30    0.39 
  -4   1  -1   23.96    0.30 
  -4   1  -1   23.53    0.33 
  -4   1  -1   23.93    0.32 
   4  -1   1   23.47    0.31 
   4  -1   1   22.72    0.31 
   4  -1   1   23.24    0.31 
   4  -1   1   23.37    0.30 
   4  -1   1   24.49    0.41 
  -5   1  -1    7.88    0.17 
  -5   1  -1    6.67    0.14 
  -5   1  -1    7.24    0.19 
   5  -1   1    6.92    0.14 
   5  -1   1    7.10    0.16 
   5  -1   1    6.95    0.17 
   5  -1   1    7.36    0.15 
   5  -1   1    7.31    0.25 
  -6   1  -1   17.65    0.21 
  -6   1  -1   17.06    0.27 
   6  -1   1   17.27    0.23 
   6  -1   1   17.19    0.21 
   6  -1   1   16.81    0.32 
   6  -1   1   16.21    0.18 
  -7   1  -1   -0.35    0.16 
  -7   1  -1   -0.16    0.21 
   7  -1   1   -0.26    0.30 
   8   0  -1    0.58    0.28 
   8   0  -1   -0.80    0.36 
  -8   0   1    0.13    0.18 
  -8   0   1   -0.42    0.25 
   7   0  -1    2.32    0.15 
   7   0  -1    1.98    0.30 
   7   0  -1    2.42    0.22 
  -7   0   1    2.48    0.19 
  -7   0   1    2.96    0.15 
   6   0  -1    0.09    0.16 
   6   0  -1    0.08    0.12 
   6   0  -1    0.18    0.26 
   6   0  -1    0.40    0.15 
  -6   0   1    0.07    0.16 
  -6   0   1   -0.07    0.15 
  -6   0   1    0.26    0.13 
   5   0  -1    9.19    0.27 
   5   0  -1    8.70    0.18 
   5   0  -1    9.01    0.18 
   5   0  -1    9.82    0.20 
   5   0  -1    8.91    0.19 
  -5   0   1    9.54    0.19 
  -5   0   1    8.92    0.15 
  -5   0   1    9.21    0.18 
  -5   0   1    8.92    0.16 
  -5   0   1   10.08    0.20 
   4   0  -1    1.36    0.09 
   4   0  -1    1.18    0.09 
   4   0  -1    1.13    0.10 
   4   0  -1    1.30    0.09 
   4   0  -1    1.48    0.18 
  -4   0   1    1.58    0.09 
  -4   0   1    1.30    0.07 
  -4   0   1    1.36    0.09 
  -4   0   1    1.24    0.07 
  -4   0   1    1.20    0.10 
  -4   0   1    1.67    0.09 
  -4   0   1    1.40    0.14 
   3   0  -1   11.43    0.09 
   3   0  -1   11.68    0.09 
   3   0  -1   11.22    0.15 
   3   0  -1   11.35    0.08 
   3   0  -1   11.43    0.10 
  -3   0   1   11.20    0.13 
  -3   0   1   11.34    0.08 
  -3   0   1   11.50    0.09 
  -3   0   1   11.49    0.09 
  -3   0   1   11.60    0.08 
  -3   0   1   11.51    0.09 
   2   0  -1    0.86    0.08 
   2   0  -1    1.62    0.10 
   2   0  -1    1.36    0.14 
   2   0  -1    1.30    0.09 
  -2   0   1    1.46    0.09 
  -2   0   1    1.31    0.13 
  -2   0   1    1.70    0.10 
  -2   0   1    1.01    0.09 
  -2   0   1    1.45    0.09 
  -1   0   1   60.30    0.36 
   0   0  -1    0.00    0.00 
   0   0  -1    0.00    0.00 
   0   0  -1    0.00    0.00 
   0   0  -1    0.01    0.00 
   0   0  -1    0.00    0.01 
   0   0  -1   -0.01    0.00 
   0   0   1    0.00    0.00 
   0   0   1    0.00    0.01 
   0   0   1    0.02    0.01 
   0   0   1    0.00    0.00 
   0   0   1   -0.01    0.00 
   0   0   1    0.00    0.00 
  -1   0  -1  190.01    1.70 
  -1   0  -1  186.40    1.69 
  -1   0  -1  190.55    1.69 
  -1   0  -1  185.80    1.70 
   1   0   1  188.85    1.69 
  -2   0  -1   93.23    0.99 
  -2   0  -1   98.35    0.99 
  -2   0  -1   97.36    1.00 
  -2   0  -1   94.62    1.01 
   2   0   1   98.11    0.99 
   2   0   1   94.45    1.02 
  -3   0  -1    4.98    0.13 
  -3   0  -1    5.29    0.11 
  -3   0  -1    4.99    0.09 
  -3   0  -1    5.20    0.10 
  -3   0  -1    4.81    0.07 
  -3   0  -1    4.90    0.07 
  -3   0  -1    5.15    0.09 
   3   0   1    4.82    0.09 
   3   0   1    5.05    0.10 
   3   0   1    4.99    0.10 
   3   0   1    5.33    0.15 
   3   0   1    5.10    0.10 
  -4   0  -1   18.28    0.31 
  -4   0  -1   18.50    0.28 
  -4   0  -1   19.17    0.26 
  -4   0  -1   18.02    0.26 
  -4   0  -1   18.97    0.26 
   4   0   1   18.72    0.26 
   4   0   1   19.32    0.26 
   4   0   1   19.47    0.36 
   4   0   1   18.37    0.27 
   4   0   1   18.09    0.26 
  -5   0  -1    1.39    0.17 
  -5   0  -1    1.64    0.13 
  -5   0  -1    0.89    0.17 
  -5   0  -1    1.52    0.13 
   5   0   1    1.56    0.13 
   5   0   1    1.20    0.11 
   5   0   1    1.07    0.12 
   5   0   1    1.50    0.22 
   5   0   1    1.20    0.15 
  -6   0  -1    3.32    0.22 
  -6   0  -1    4.31    0.18 
  -6   0  -1    2.79    0.18 
   6   0   1    3.68    0.22 
   6   0   1    3.92    0.29 
   6   0   1    3.32    0.16 
   6   0   1    3.20    0.20 
  -7   0  -1    0.77    0.18 
  -7   0  -1    1.52    0.15 
   7   0   1    1.23    0.14 
   7   0   1    0.95    0.28 
   7   0   1    0.81    0.20 
  -8   0  -1    0.07    0.21 
  -8   0  -1   -0.14    0.23 
   8   0   1   -0.78    0.34 
  -8   1   1    0.75    0.18 
   7  -1  -1    2.43    0.22 
   7  -1  -1    2.60    0.16 
   7  -1  -1    2.71    0.32 
  -7   1   1    2.73    0.18 
  -7   1   1    2.41    0.20 
   6  -1  -1    5.92    0.18 
   6  -1  -1    5.97    0.21 
   6  -1  -1    6.05    0.30 
   6  -1  -1    6.23    0.16 
  -6   1   1    6.96    0.21 
  -6   1   1    5.50    0.17 
  -6   1   1    6.96    0.18 
   5  -1  -1    0.24    0.08 
   5  -1  -1    0.11    0.11 
   5  -1  -1   -0.16    0.11 
   5  -1  -1    0.13    0.09 
   5  -1  -1   -0.25    0.20 
  -5   1   1    0.05    0.13 
  -5   1   1    0.18    0.11 
  -5   1   1   -0.06    0.10 
   4  -1  -1   47.47    0.49 
   4  -1  -1   46.89    0.48 
   4  -1  -1   47.36    0.48 
   4  -1  -1   47.88    0.58 
   4  -1  -1   47.01    0.48 
  -4   1   1   47.84    0.49 
  -4   1   1   46.66    0.54 
  -4   1   1   47.43    0.49 
  -4   1   1   48.58    0.48 
   3  -1  -1   51.05    0.79 
   3  -1  -1   51.20    0.73 
   3  -1  -1   51.83    0.73 
   3  -1  -1   51.28    0.73 
   3  -1  -1   51.15    0.73 
  -3   1   1   50.30    0.77 
  -3   1   1   50.46    0.72 
  -3   1   1   50.83    0.73 
  -3   1   1   51.57    0.74 
  -3   1   1   51.49    0.72 
  -3   1   1   52.26    0.73 
  -3   1   1   50.28    0.73 
   2  -1  -1   51.40    0.44 
   2  -1  -1   50.92    0.49 
   2  -1  -1   51.41    0.44 
   2  -1  -1   50.43    0.44 
   2  -1  -1   49.94    0.44 
  -2   1   1   50.19    0.44 
  -2   1   1   51.18    0.44 
  -2   1   1   51.06    0.48 
  -2   1   1   50.68    0.43 
  -2   1   1   50.24    0.44 
  -2   1   1   51.88    0.44 
   1  -1  -1    3.03    0.06 
   1  -1  -1    3.16    0.06 
   1  -1  -1    3.11    0.10 
   1  -1  -1    3.37    0.07 
  -1   1   1    3.32    0.06 
  -1   1   1    3.09    0.06 
  -1   1   1    3.08    0.06 
  -1   1   1    2.86    0.06 
  -1   1   1    3.13    0.09 
  -1   1   1    3.44    0.06 
   0  -1  -1    0.03    0.01 
   0  -1  -1    0.04    0.01 
   0  -1  -1    0.04    0.01 
   0  -1  -1    0.06    0.01 
   0  -1  -1    0.03    0.01 
   0  -1  -1    0.09    0.02 
   0   1   1    0.05    0.00 
   0   1   1    0.04    0.01 
   0   1   1    0.03    0.02 
   0   1   1    0.04    0.01 
   0   1   1    0.06    0.02 
  -1  -1  -1  106.74    0.67 
  -1  -1  -1  108.03    0.68 
   1   1   1  107.97    0.67 
  -2  -1  -1   14.92    0.13 
  -2  -1  -1   14.84    0.18 
  -2  -1  -1   15.08    0.13 
  -2  -1  -1   14.52    0.12 
   2   1   1   14.36    0.12 
   2   1   1   14.32    0.12 
  -3  -1  -1    7.94    0.09 
  -3  -1  -1    7.33    0.09 
  -3  -1  -1    7.46    0.13 
  -3  -1  -1    7.93    0.10 
  -3  -1  -1    7.22    0.09 
  -3  -1  -1    8.01    0.11 
   3   1   1    7.35    0.10 
   3   1   1    8.18    0.11 
   3   1   1    8.80    0.20 
   3   1   1    7.78    0.10 
  -4  -1  -1    8.76    0.11 
  -4  -1  -1    8.83    0.10 
  -4  -1  -1    8.36    0.14 
  -4  -1  -1    8.71    0.13 
  -4  -1  -1    8.92    0.11 
  -4  -1  -1    8.66    0.10 
  -4  -1  -1    8.61    0.10 
   4   1   1    8.81    0.11 
   4   1   1    8.75    0.11 
   4   1   1    9.28    0.18 
   4   1   1    9.33    0.12 
   4   1   1    8.98    0.12 
  -5  -1  -1    8.05    0.18 
  -5  -1  -1    7.90    0.11 
  -5  -1  -1    8.23    0.12 
  -5  -1  -1    8.49    0.13 
  -5  -1  -1    8.20    0.16 
  -5  -1  -1    8.83    0.15 
   5   1   1    8.38    0.22 
   5   1   1    7.86    0.12 
   5   1   1    8.71    0.18 
   5   1   1    8.33    0.14 
   5   1   1    8.09    0.14 
  -6  -1  -1   10.22    0.17 
  -6  -1  -1   10.58    0.21 
   6   1   1   10.55    0.21 
   6   1   1   10.79    0.21 
   6   1   1    9.99    0.17 
   6   1   1   10.64    0.30 
  -7  -1  -1    9.38    0.20 
  -7  -1  -1    8.46    0.25 
   7   1   1    8.38    0.22 
   7   1   1    7.74    0.34 
  -8  -1  -1    2.95    0.22 
  -8  -1  -1    2.73    0.26 
   8   1   1    2.44    0.26 
   8   1   1    3.13    0.34 
   7  -2  -1    1.09    0.35 
   7  -2  -1    1.71    0.23 
  -7   2   1    1.60    0.19 
  -7   2   1    1.72    0.30 
   6  -2  -1    1.52    0.13 
   6  -2  -1    2.29    0.32 
   6  -2  -1    1.88    0.18 
  -6   2   1    1.93    0.22 
  -6   2   1    2.14    0.17 
   5  -2  -1   44.50    0.62 
   5  -2  -1   42.95    0.46 
   5  -2  -1   43.67    0.47 
   5  -2  -1   43.72    0.48 
  -5   2   1   43.81    0.48 
  -5   2   1   43.46    0.51 
  -5   2   1   44.74    0.48 
   4  -2  -1   20.38    0.19 
   4  -2  -1   20.28    0.33 
   4  -2  -1   19.61    0.20 
   4  -2  -1   19.77    0.18 
  -4   2   1   19.75    0.18 
  -4   2   1   19.91    0.22 
  -4   2   1   19.88    0.20 
   3  -2  -1   55.91    0.53 
   3  -2  -1   57.05    0.45 
   3  -2  -1   55.37    0.45 
   3  -2  -1   57.06    0.45 
  -3   2   1   55.63    0.46 
  -3   2   1   54.95    0.45 
  -3   2   1   54.82    0.45 
  -3   2   1   55.10    0.51 
  -3   2   1   56.17    0.47 
   2  -2  -1   26.68    0.57 
   2  -2  -1   27.39    0.52 
   2  -2  -1   27.73    0.52 
   2  -2  -1   26.28    0.52 
  -2   2   1   26.80    0.52 
  -2   2   1   25.94    0.53 
  -2   2   1   26.44    0.52 
  -2   2   1   27.08    0.53 
   1  -2  -1  276.11    2.31 
   1  -2  -1  283.63    2.29 
   1  -2  -1  274.71    2.29 
   1  -2  -1  282.35    2.29 
   1  -2  -1  271.50    2.29 
  -1   2   1  276.43    2.28 
  -1   2   1  277.63    2.29 
  -1   2   1  282.70    2.28 
  -1   2   1  279.07    2.29 
  -1   2   1  272.82    2.29 
   0  -2  -1   69.01    0.75 
   0  -2  -1   69.22    0.75 
   0  -2  -1   66.40    0.75 
   0  -2  -1   65.52    0.75 
   0  -2  -1   66.68    0.76 
   0   2   1   66.26    0.75 
   0   2   1   65.68    0.75 
   0   2   1   68.76    0.75 
   0   2   1   67.56    0.75 
  -1  -2  -1   27.92    0.14 
  -1  -2  -1   28.15    0.13 
  -1  -2  -1   28.38    0.12 
  -1  -2  -1   28.66    0.12 
  -1  -2  -1   28.21    0.12 
   1   2   1   28.49    0.12 
   1   2   1   28.24    0.12 
   1   2   1   28.24    0.13 
   1   2   1   28.11    0.15 
   1   2   1   28.46    0.12 
  -2  -2  -1   45.61    0.25 
  -2  -2  -1   44.11    0.25 
  -2  -2  -1   45.25    0.29 
   2   2   1   44.02    0.25 
   2   2   1   44.10    0.25 
   2   2   1   45.90    0.25 
   2   2   1   45.85    0.29 
  -3  -2  -1   46.89    0.20 
  -3  -2  -1   47.56    0.20 
  -3  -2  -1   46.90    0.26 
  -3  -2  -1   47.18    0.20 
  -3  -2  -1   46.82    0.20 
   3   2   1   46.44    0.20 
   3   2   1   47.80    0.21 
   3   2   1   46.53    0.20 
   3   2   1   46.62    0.21 
  -4  -2  -1   36.76    0.33 
  -4  -2  -1   38.74    0.35 
  -4  -2  -1   37.29    0.34 
  -4  -2  -1   36.08    0.32 
  -4  -2  -1   36.60    0.39 
  -4  -2  -1   37.57    0.34 
  -4  -2  -1   36.77    0.34 
   4   2   1   38.30    0.41 
   4   2   1   38.10    0.35 
   4   2   1   36.77    0.34 
   4   2   1   36.92    0.34 
   4   2   1   37.69    0.34 
  -5  -2  -1    1.96    0.07 
  -5  -2  -1    1.86    0.14 
  -5  -2  -1    1.78    0.10 
  -5  -2  -1    1.84    0.09 
  -5  -2  -1    1.91    0.08 
  -5  -2  -1    1.95    0.11 
   5   2   1    1.64    0.12 
   5   2   1    1.84    0.10 
   5   2   1    1.88    0.11 
   5   2   1    2.14    0.19 
  -6  -2  -1    1.50    0.18 
  -6  -2  -1    1.41    0.13 
  -6  -2  -1    1.36    0.21 
  -6  -2  -1    1.06    0.12 
  -6  -2  -1    0.95    0.11 
   6   2   1    0.73    0.14 
   6   2   1    1.31    0.26 
   6   2   1    1.54    0.20 
   6   2   1    1.19    0.21 
  -7  -2  -1    4.19    0.14 
  -7  -2  -1    4.88    0.21 
   7   2   1    4.63    0.20 
   7   2   1    3.88    0.30 
  -8  -2  -1   12.41    0.24 
   8   2   1   12.25    0.25 
   8   2   1   10.27    0.37 
   7  -3  -1    5.17    0.39 
  -7   3   1    5.12    0.26 
  -7   3   1    5.56    0.22 
   6  -3  -1    6.47    0.22 
   6  -3  -1    5.58    0.19 
   6  -3  -1    6.93    0.25 
   6  -3  -1    6.37    0.39 
  -6   3   1    6.40    0.27 
  -6   3   1    6.32    0.24 
   5  -3  -1   12.09    0.20 
   5  -3  -1   13.77    0.37 
   5  -3  -1   12.91    0.23 
   5  -3  -1   12.79    0.21 
  -5   3   1   13.92    0.27 
   4  -3  -1    4.69    0.11 
   4  -3  -1    4.51    0.09 
   4  -3  -1    4.74    0.22 
   4  -3  -1    4.42    0.10 
  -4   3   1    4.54    0.08 
  -4   3   1    4.97    0.15 
  -4   3   1    4.67    0.13 
   3  -3  -1    6.92    0.10 
   3  -3  -1    7.10    0.19 
   3  -3  -1    7.42    0.11 
   3  -3  -1    7.42    0.11 
   3  -3  -1    7.21    0.10 
  -3   3   1    6.61    0.08 
  -3   3   1    7.37    0.14 
  -3   3   1    6.89    0.08 
  -3   3   1    6.86    0.11 
   2  -3  -1   18.21    0.44 
   2  -3  -1   16.59    0.38 
   2  -3  -1   15.82    0.36 
   2  -3  -1   17.04    0.36 
  -2   3   1   15.89    0.35 
  -2   3   1   16.01    0.35 
  -2   3   1   16.83    0.37 
   1  -3  -1    6.83    0.05 
   1  -3  -1    6.60    0.07 
   1  -3  -1    6.68    0.04 
   1  -3  -1    6.80    0.05 
   1  -3  -1    6.95    0.05 
  -1   3   1    6.81    0.05 
  -1   3   1    6.65    0.06 
  -1   3   1    6.65    0.04 
   0  -3  -1    3.03    0.13 
   0  -3  -1    3.16    0.13 
   0  -3  -1    2.63    0.14 
   0   3   1    3.16    0.12 
   0   3   1    2.74    0.14 
   0   3   1    3.21    0.12 
   0   3   1    2.24    0.13 
  -1  -3  -1   23.77    0.39 
  -1  -3  -1   22.75    0.39 
  -1  -3  -1   23.85    0.40 
  -1  -3  -1   24.26    0.39 
   1   3   1   23.40    0.39 
   1   3   1   24.24    0.41 
   1   3   1   23.46    0.39 
   1   3   1   24.97    0.40 
   1   3   1   22.33    0.40 
   1   3   1   23.42    0.39 
  -2  -3  -1    5.70    0.16 
  -2  -3  -1    5.31    0.16 
  -2  -3  -1    5.69    0.18 
  -2  -3  -1    5.09    0.17 
   2   3   1    5.41    0.17 
   2   3   1    6.38    0.21 
   2   3   1    5.87    0.17 
   2   3   1    6.00    0.17 
   2   3   1    5.65    0.17 
  -3  -3  -1    1.77    0.11 
  -3  -3  -1    1.86    0.12 
  -3  -3  -1    1.05    0.11 
  -3  -3  -1    1.69    0.12 
  -3  -3  -1    1.52    0.16 
  -3  -3  -1    1.39    0.11 
   3   3   1    1.57    0.12 
   3   3   1    1.32    0.15 
   3   3   1    1.38    0.11 
   3   3   1    1.47    0.12 
   3   3   1    1.71    0.12 
  -4  -3  -1    7.77    0.10 
  -4  -3  -1    7.82    0.10 
  -4  -3  -1    7.63    0.14 
  -4  -3  -1    8.19    0.09 
  -4  -3  -1    8.06    0.10 
   4   3   1    7.95    0.09 
   4   3   1    8.39    0.15 
   4   3   1    7.49    0.10 
   4   3   1    8.36    0.11 
   4   3   1    7.94    0.11 
  -5  -3  -1    6.79    0.20 
  -5  -3  -1    5.87    0.18 
  -5  -3  -1    5.47    0.22 
  -5  -3  -1    6.19    0.19 
  -5  -3  -1    6.37    0.19 
  -5  -3  -1    6.22    0.16 
   5   3   1    5.95    0.25 
   5   3   1    6.09    0.20 
   5   3   1    6.41    0.20 
   5   3   1    6.31    0.22 
  -6  -3  -1    1.59    0.14 
  -6  -3  -1    0.88    0.19 
  -6  -3  -1    1.54    0.12 
  -6  -3  -1    1.97    0.15 
  -6  -3  -1    1.61    0.17 
   6   3   1    1.12    0.27 
   6   3   1    1.58    0.21 
   6   3   1    1.14    0.20 
   6   3   1    1.85    0.16 
  -7  -3  -1    1.22    0.15 
  -7  -3  -1    1.25    0.18 
  -7  -3  -1    1.34    0.12 
   7   3   1    1.24    0.25 
   7   3   1    0.48    0.30 
   7   3   1    1.37    0.17 
   7   3   1    1.40    0.28 
  -8  -3  -1    8.91    0.25 
   8   3   1    8.40    0.24 
   8   3   1    6.81    0.39 
   8   3   1    9.42    0.42 
   7  -4  -1    2.77    0.37 
  -7   4   1    2.86    0.21 
  -7   4   1    2.44    0.24 
   6  -4  -1   15.95    0.29 
   6  -4  -1   15.20    0.27 
   6  -4  -1   15.40    0.42 
  -6   4   1   16.23    0.29 
  -6   4   1   15.37    0.35 
   5  -4  -1   13.65    0.41 
   5  -4  -1   13.46    0.27 
   5  -4  -1   13.01    0.26 
   5  -4  -1   12.39    0.24 
  -5   4   1   13.10    0.31 
  -5   4   1   13.94    0.28 
   4  -4  -1   21.90    0.19 
   4  -4  -1   21.78    0.18 
   4  -4  -1   21.19    0.17 
   4  -4  -1   22.15    0.20 
   4  -4  -1   21.67    0.31 
  -4   4   1   22.08    0.24 
  -4   4   1   21.76    0.21 
   3  -4  -1   12.58    0.39 
   3  -4  -1   12.80    0.27 
   3  -4  -1   11.91    0.26 
   3  -4  -1   12.68    0.27 
   3  -4  -1   11.53    0.26 
  -3   4   1   12.83    0.29 
  -3   4   1   12.45    0.30 
   2  -4  -1    8.33    0.07 
   2  -4  -1    8.39    0.11 
   2  -4  -1    8.98    0.09 
   2  -4  -1    8.32    0.07 
   2  -4  -1    8.49    0.15 
   2  -4  -1    8.74    0.09 
  -2   4   1    8.55    0.07 
  -2   4   1    9.10    0.13 
  -2   4   1    8.46    0.11 
   1  -4  -1   31.16    0.63 
   1  -4  -1   32.51    0.63 
   1  -4  -1   31.03    0.63 
   1  -4  -1   31.62    0.63 
   1  -4  -1   31.60    0.65 
  -1   4   1   31.66    0.63 
  -1   4   1   30.96    0.64 
  -1   4   1   31.85    0.63 
   0  -4  -1    2.17    0.07 
   0  -4  -1    2.34    0.07 
   0  -4  -1    2.16    0.06 
   0  -4  -1    2.27    0.06 
   0  -4  -1    2.38    0.06 
   0  -4  -1    2.23    0.06 
   0   4   1    2.35    0.06 
   0   4   1    2.23    0.08 
   0   4   1    2.19    0.05 
   0   4   1    2.22    0.05 
   0   4   1    2.30    0.07 
   0   4   1    2.28    0.07 
  -1  -4  -1    5.57    0.07 
  -1  -4  -1    5.27    0.07 
  -1  -4  -1    5.80    0.08 
  -1  -4  -1    5.66    0.07 
  -1  -4  -1    6.01    0.08 
   1   4   1    5.71    0.09 
   1   4   1    5.45    0.07 
   1   4   1    5.66    0.07 
   1   4   1    5.51    0.07 
   1   4   1    5.77    0.07 
   1   4   1    5.78    0.08 
  -2  -4  -1    9.29    0.12 
  -2  -4  -1    9.62    0.15 
  -2  -4  -1    8.43    0.12 
   2   4   1    9.44    0.13 
   2   4   1    8.53    0.11 
   2   4   1    9.20    0.17 
   2   4   1    9.03    0.12 
  -3  -4  -1    3.14    0.15 
  -3  -4  -1    4.07    0.26 
   3   4   1    4.07    0.17 
   3   4   1    3.43    0.17 
   3   4   1    3.92    0.18 
  -4  -4  -1    1.16    0.12 
  -4  -4  -1    0.70    0.14 
  -4  -4  -1    0.70    0.10 
  -4  -4  -1    0.74    0.08 
  -4  -4  -1    1.08    0.09 
  -4  -4  -1    0.75    0.09 
   4   4   1    0.63    0.09 
   4   4   1    0.51    0.08 
   4   4   1    0.58    0.13 
   4   4   1    1.13    0.11 
   4   4   1    1.20    0.15 
   4   4   1    0.83    0.10 
  -5  -4  -1   23.00    0.19 
  -5  -4  -1   22.15    0.17 
  -5  -4  -1   23.55    0.19 
  -5  -4  -1   22.65    0.18 
  -5  -4  -1   21.95    0.22 
   5   4   1   22.99    0.19 
   5   4   1   22.54    0.25 
   5   4   1   23.00    0.24 
   5   4   1   23.26    0.20 
   5   4   1   23.45    0.20 
  -6  -4  -1   13.86    0.32 
  -6  -4  -1   12.36    0.27 
  -6  -4  -1   13.47    0.31 
  -6  -4  -1   12.19    0.30 
  -6  -4  -1   13.21    0.37 
   6   4   1   13.54    0.35 
   6   4   1   12.97    0.47 
   6   4   1   13.34    0.33 
   6   4   1   14.17    0.38 
   6   4   1   14.66    0.49 
  -7  -4  -1    4.51    0.18 
  -7  -4  -1    4.46    0.19 
   7   4   1    3.15    0.30 
   7   4   1    4.10    0.21 
  -8  -4  -1    0.31    0.19 
   8   4   1   -0.01    0.22 
   8   4   1   -1.32    0.33 
   6  -5  -1    0.65    0.33 
  -6   5   1    0.37    0.22 
  -6   5   1    0.32    0.20 
   5  -5  -1    0.39    0.14 
   5  -5  -1    0.32    0.11 
   5  -5  -1    0.52    0.29 
  -5   5   1    0.45    0.19 
  -5   5   1    0.39    0.18 
   4  -5  -1    1.26    0.08 
   4  -5  -1    1.38    0.10 
   4  -5  -1    1.26    0.09 
   4  -5  -1    1.25    0.11 
   4  -5  -1    1.39    0.25 
  -4   5   1    1.13    0.14 
  -4   5   1    1.27    0.17 
   3  -5  -1   12.81    0.17 
   3  -5  -1   12.94    0.29 
   3  -5  -1   12.35    0.16 
   3  -5  -1   12.16    0.17 
   3  -5  -1   12.46    0.18 
  -3   5   1   13.02    0.21 
  -3   5   1   13.17    0.22 
   2  -5  -1    1.08    0.09 
   2  -5  -1    0.64    0.14 
   2  -5  -1    1.43    0.10 
   2  -5  -1    1.03    0.08 
   2  -5  -1    0.86    0.07 
   2  -5  -1    1.04    0.18 
  -2   5   1    0.96    0.07 
  -2   5   1    1.06    0.11 
   1  -5  -1    6.49    0.13 
   1  -5  -1    6.51    0.11 
   1  -5  -1    5.82    0.10 
   1  -5  -1    6.66    0.12 
   1  -5  -1    5.88    0.10 
   1  -5  -1    6.37    0.13 
  -1   5   1    6.49    0.11 
  -1   5   1    6.50    0.13 
  -1   5   1    6.49    0.10 
   0  -5  -1    9.42    0.23 
   0  -5  -1   10.16    0.23 
   0  -5  -1    9.71    0.24 
   0  -5  -1    8.83    0.23 
   0  -5  -1   10.29    0.26 
   0  -5  -1    9.86    0.24 
   0   5   1   10.01    0.23 
   0   5   1    9.85    0.25 
   0   5   1    9.16    0.23 
   0   5   1    9.98    0.23 
   0   5   1    9.59    0.23 
   0   5   1    9.56    0.23 
  -1  -5  -1    4.11    0.16 
  -1  -5  -1    3.63    0.15 
  -1  -5  -1    3.87    0.14 
  -1  -5  -1    4.04    0.16 
  -1  -5  -1    4.51    0.16 
  -1  -5  -1    4.15    0.15 
   1   5   1    4.21    0.17 
   1   5   1    3.95    0.13 
   1   5   1    4.05    0.15 
   1   5   1    4.22    0.16 
   1   5   1    4.15    0.15 
  -2  -5  -1   29.31    0.29 
  -2  -5  -1   29.55    0.29 
  -2  -5  -1   31.45    0.28 
  -2  -5  -1   30.33    0.28 
  -2  -5  -1   30.64    0.29 
   2   5   1   30.40    0.31 
   2   5   1   30.27    0.28 
   2   5   1   31.10    0.29 
   2   5   1   30.21    0.28 
   2   5   1   30.93    0.29 
   2   5   1   30.14    0.31 
   2   5   1   30.36    0.28 
  -3  -5  -1    1.54    0.12 
  -3  -5  -1    1.35    0.16 
  -3  -5  -1    1.30    0.11 
  -3  -5  -1    1.08    0.13 
  -3  -5  -1    0.98    0.11 
   3   5   1    1.26    0.12 
   3   5   1    1.10    0.14 
   3   5   1    1.10    0.14 
   3   5   1    1.44    0.12 
   3   5   1    0.85    0.11 
   3   5   1    1.49    0.13 
  -4  -5  -1    9.49    0.21 
  -4  -5  -1    8.66    0.19 
  -4  -5  -1    8.51    0.24 
  -4  -5  -1    9.13    0.21 
  -4  -5  -1    9.12    0.21 
   4   5   1    9.97    0.22 
   4   5   1    9.38    0.22 
   4   5   1    8.78    0.23 
   4   5   1    8.71    0.20 
   4   5   1    9.53    0.24 
  -5  -5  -1    7.94    0.21 
  -5  -5  -1    6.55    0.19 
  -5  -5  -1    6.96    0.17 
  -5  -5  -1    5.76    0.22 
   5   5   1    6.91    0.20 
   5   5   1    6.77    0.24 
   5   5   1    6.85    0.20 
   5   5   1    7.04    0.20 
  -6  -5  -1   34.09    0.43 
  -6  -5  -1   33.46    0.46 
  -6  -5  -1   34.24    0.42 
   6   5   1   36.07    0.56 
   6   5   1   34.74    0.57 
   6   5   1   34.49    0.45 
   6   5   1   34.21    0.45 
  -7  -5  -1   16.94    0.36 
  -7  -5  -1   16.84    0.31 
   7   5   1   16.29    0.39 
   7   5   1   15.29    0.42 
   7   5   1   17.86    0.50 
   7   5   1   15.93    0.34 
  -8  -5  -1    2.21    0.22 
  -8  -5  -1    2.59    0.22 
   8   5   1    2.75    0.21 
   8   5   1    1.22    0.35 
   6  -6  -1    0.44    0.37 
  -6   6   1   -0.62    0.21 
   5  -6  -1    0.94    0.31 
   5  -6  -1    1.21    0.15 
   5  -6  -1    0.97    0.11 
  -5   6   1    1.21    0.20 
   4  -6  -1    0.17    0.23 
   4  -6  -1    0.20    0.08 
   4  -6  -1   -0.03    0.10 
   4  -6  -1    0.13    0.10 
  -4   6   1   -0.12    0.16 
   3  -6  -1    6.37    0.13 
   3  -6  -1    6.62    0.26 
   3  -6  -1    5.72    0.10 
   3  -6  -1    6.20    0.13 
   3  -6  -1    6.68    0.13 
  -3   6   1    6.46    0.18 
   2  -6  -1   10.82    0.15 
   2  -6  -1   10.36    0.14 
   2  -6  -1   10.50    0.14 
   2  -6  -1   11.46    0.18 
   2  -6  -1   10.75    0.16 
  -2   6   1   10.85    0.18 
   1  -6  -1    2.55    0.08 
   1  -6  -1    2.43    0.10 
   1  -6  -1    2.22    0.07 
   1  -6  -1    2.55    0.09 
   1  -6  -1    2.04    0.07 
   1  -6  -1    2.42    0.09 
  -1   6   1    2.68    0.07 
  -1   6   1    2.33    0.11 
  -1   6   1    2.21    0.07 
  -1   6   1    2.44    0.12 
   0  -6  -1    4.75    0.09 
   0  -6  -1    4.61    0.10 
   0  -6  -1    4.53    0.09 
   0  -6  -1    4.64    0.10 
   0  -6  -1    5.16    0.10 
   0  -6  -1    4.86    0.10 
   0   6   1    5.38    0.10 
   0   6   1    5.30    0.09 
   0   6   1    4.83    0.08 
   0   6   1    5.27    0.11 
   0   6   1    4.78    0.12 
   0   6   1    4.78    0.09 
  -1  -6  -1    2.97    0.14 
  -1  -6  -1    2.86    0.16 
  -1  -6  -1    2.71    0.14 
  -1  -6  -1    2.82    0.14 
  -1  -6  -1    1.89    0.11 
  -1  -6  -1    2.33    0.13 
   1   6   1    2.32    0.13 
   1   6   1    2.69    0.13 
   1   6   1    2.11    0.12 
   1   6   1    2.59    0.15 
   1   6   1    2.57    0.15 
   1   6   1    2.41    0.12 
  -2  -6  -1   37.36    0.40 
  -2  -6  -1   38.87    0.41 
  -2  -6  -1   39.27    0.40 
  -2  -6  -1   39.88    0.41 
  -2  -6  -1   38.51    0.41 
   2   6   1   39.36    0.40 
   2   6   1   38.70    0.41 
   2   6   1   39.51    0.43 
   2   6   1   39.48    0.42 
   2   6   1   38.71    0.40 
   2   6   1   39.59    0.41 
   2   6   1   39.25    0.39 
  -3  -6  -1   34.73    0.39 
  -3  -6  -1   33.15    0.44 
  -3  -6  -1   33.92    0.38 
  -3  -6  -1   33.54    0.37 
  -3  -6  -1   33.68    0.37 
   3   6   1   33.79    0.37 
   3   6   1   33.81    0.39 
   3   6   1   34.53    0.38 
   3   6   1   34.74    0.38 
   3   6   1   33.78    0.40 
   3   6   1   33.64    0.41 
  -4  -6  -1    7.72    0.31 
  -4  -6  -1    7.87    0.31 
  -4  -6  -1    9.32    0.32 
   4   6   1    8.99    0.31 
   4   6   1    7.98    0.35 
   4   6   1    8.30    0.31 
   4   6   1    8.11    0.32 
   4   6   1    7.70    0.37 
  -5  -6  -1    3.91    0.12 
  -5  -6  -1    3.67    0.13 
  -5  -6  -1    3.70    0.10 
   5   6   1    3.81    0.15 
   5   6   1    4.04    0.13 
   5   6   1    3.93    0.17 
   5   6   1    3.72    0.13 
  -6  -6  -1    4.39    0.18 
  -6  -6  -1    5.26    0.23 
  -6  -6  -1    4.14    0.16 
   6   6   1    4.40    0.19 
   6   6   1    4.86    0.24 
   6   6   1    5.10    0.23 
  -7  -6  -1    9.50    0.24 
  -7  -6  -1    9.48    0.25 
   7   6   1   10.07    0.33 
   7   6   1    9.89    0.31 
   7   6   1    9.48    0.26 
  -8  -6  -1    0.56    0.22 
  -8  -6  -1    1.01    0.17 
   8   6   1   -0.34    0.34 
   8   6   1    1.31    0.29 
   5  -7  -1    1.19    0.35 
   5  -7  -1    0.60    0.12 
   5  -7  -1    1.03    0.15 
  -5   7   1    0.94    0.22 
   4  -7  -1    0.69    0.29 
   4  -7  -1    0.78    0.11 
   4  -7  -1    0.61    0.10 
  -4   7   1    0.24    0.18 
   3  -7  -1    0.40    0.07 
   3  -7  -1    0.37    0.09 
   3  -7  -1    0.23    0.23 
   3  -7  -1    0.53    0.07 
   3  -7  -1    0.46    0.10 
  -3   7   1    0.19    0.15 
   2  -7  -1   19.50    0.16 
   2  -7  -1   19.66    0.16 
   2  -7  -1   19.87    0.20 
   2  -7  -1   19.35    0.16 
   2  -7  -1   19.75    0.17 
  -2   7   1   19.74    0.19 
   1  -7  -1    4.24    0.10 
   1  -7  -1    4.39    0.10 
   1  -7  -1    4.30    0.11 
   1  -7  -1    4.17    0.10 
   1  -7  -1    4.64    0.11 
  -1   7   1    4.56    0.14 
  -1   7   1    4.70    0.16 
  -1   7   1    4.23    0.08 
   0  -7  -1   -0.02    0.09 
   0  -7  -1   -0.01    0.07 
   0  -7  -1   -0.18    0.07 
   0  -7  -1    0.03    0.08 
   0  -7  -1   -0.11    0.09 
   0  -7  -1   -0.04    0.07 
   0   7   1   -0.06    0.08 
   0   7   1   -0.03    0.06 
   0   7   1    0.06    0.07 
   0   7   1    0.03    0.11 
   0   7   1   -0.13    0.09 
  -1  -7  -1    5.52    0.12 
  -1  -7  -1    5.91    0.13 
  -1  -7  -1    5.23    0.10 
  -1  -7  -1    5.95    0.11 
  -1  -7  -1    5.66    0.11 
  -1  -7  -1    5.73    0.13 
   1   7   1    5.85    0.12 
   1   7   1    6.00    0.12 
   1   7   1    5.82    0.12 
   1   7   1    6.00    0.12 
   1   7   1    5.53    0.11 
   1   7   1    5.99    0.15 
   1   7   1    5.44    0.11 
  -2  -7  -1   13.46    0.19 
  -2  -7  -1   14.14    0.18 
  -2  -7  -1   13.44    0.18 
  -2  -7  -1   14.54    0.20 
  -2  -7  -1   14.09    0.18 
   2   7   1   13.38    0.17 
   2   7   1   13.79    0.21 
   2   7   1   13.75    0.21 
   2   7   1   13.41    0.16 
   2   7   1   14.00    0.19 
   2   7   1   13.97    0.20 
   2   7   1   14.18    0.18 
  -3  -7  -1  130.48    1.23 
  -3  -7  -1  131.01    1.23 
  -3  -7  -1  127.40    1.22 
   3   7   1  129.56    1.23 
   3   7   1  128.11    1.24 
   3   7   1  131.32    1.23 
   3   7   1  127.12    1.22 
   3   7   1  127.72    1.23 
   3   7   1  130.53    1.25 
  -4  -7  -1   47.62    0.53 
  -4  -7  -1   46.09    0.50 
  -4  -7  -1   45.85    0.51 
   4   7   1   46.38    0.53 
   4   7   1   46.06    0.56 
   4   7   1   47.01    0.52 
   4   7   1   44.98    0.51 
  -5  -7  -1   12.74    0.35 
  -5  -7  -1   14.01    0.33 
   5   7   1   12.59    0.34 
   5   7   1   11.87    0.32 
   5   7   1   12.63    0.42 
   5   7   1   12.24    0.33 
  -6  -7  -1    2.32    0.25 
  -6  -7  -1    3.14    0.19 
  -6  -7  -1    2.59    0.13 
   6   7   1    2.21    0.20 
   6   7   1    3.18    0.19 
   6   7   1    3.15    0.25 
  -7  -7  -1    3.80    0.21 
  -7  -7  -1    3.78    0.16 
   7   7   1    3.90    0.24 
   7   7   1    4.90    0.27 
   7   7   1    4.16    0.21 
  -8  -7  -1    0.05    0.24 
   8   7   1    0.76    0.28 
   8   7   1   -0.07    0.21 
   5  -8  -1    0.45    0.15 
   5  -8  -1    0.81    0.37 
  -5   8   1    0.31    0.24 
   4  -8  -1    3.27    0.13 
   4  -8  -1    3.38    0.35 
   4  -8  -1    2.76    0.13 
  -4   8   1    2.94    0.20 
   3  -8  -1    2.02    0.14 
   3  -8  -1    1.92    0.11 
   3  -8  -1    2.27    0.27 
   3  -8  -1    1.66    0.10 
   3  -8  -1    1.99    0.10 
  -3   8   1    1.57    0.16 
   2  -8  -1    3.06    0.11 
   2  -8  -1    2.97    0.12 
   2  -8  -1    2.94    0.14 
   2  -8  -1    2.87    0.10 
   2  -8  -1    3.03    0.11 
  -2   8   1    3.26    0.18 
   1  -8  -1   23.62    0.26 
   1  -8  -1   23.12    0.25 
   1  -8  -1   23.02    0.32 
   1  -8  -1   23.38    0.25 
   1  -8  -1   23.20    0.25 
  -1   8   1   22.48    0.26 
  -1   8   1   23.13    0.32 
  -1   8   1   22.36    0.23 
   0  -8  -1   23.22    0.36 
   0  -8  -1   23.25    0.37 
   0  -8  -1   23.11    0.36 
   0  -8  -1   23.04    0.37 
   0  -8  -1   22.65    0.40 
   0  -8  -1   21.16    0.35 
   0   8   1   22.05    0.35 
   0   8   1   22.78    0.35 
   0   8   1   22.42    0.40 
   0   8   1   22.67    0.36 
   0   8   1   23.03    0.37 
  -1  -8  -1    3.39    0.13 
  -1  -8  -1    3.88    0.16 
  -1  -8  -1    4.01    0.16 
  -1  -8  -1    4.11    0.15 
   1   8   1    3.99    0.16 
   1   8   1    3.99    0.16 
   1   8   1    3.64    0.15 
   1   8   1    3.95    0.18 
   1   8   1    4.24    0.16 
   1   8   1    3.90    0.14 
  -2  -8  -1    4.77    0.08 
  -2  -8  -1    4.63    0.12 
  -2  -8  -1    4.83    0.10 
  -2  -8  -1    4.86    0.12 
   2   8   1    4.56    0.11 
   2   8   1    4.82    0.13 
   2   8   1    4.70    0.14 
   2   8   1    4.73    0.10 
   2   8   1    4.45    0.12 
   2   8   1    5.05    0.11 
  -3  -8  -1    0.54    0.13 
  -3  -8  -1    0.56    0.13 
  -3  -8  -1    0.59    0.11 
   3   8   1    0.46    0.11 
   3   8   1    0.57    0.15 
   3   8   1    0.73    0.15 
   3   8   1    0.43    0.12 
   3   8   1    0.71    0.14 
  -4  -8  -1   10.30    0.22 
  -4  -8  -1   10.55    0.23 
  -4  -8  -1   10.83    0.26 
   4   8   1   10.92    0.24 
   4   8   1   10.09    0.24 
   4   8   1   10.83    0.24 
   4   8   1   10.50    0.23 
   4   8   1   10.18    0.21 
  -5  -8  -1    9.23    0.37 
  -5  -8  -1    9.50    0.31 
   5   8   1    8.19    0.31 
   5   8   1    8.66    0.29 
   5   8   1    9.65    0.39 
   5   8   1    8.50    0.27 
  -6  -8  -1    2.88    0.19 
  -6  -8  -1    2.82    0.27 
  -6  -8  -1    2.86    0.14 
   6   8   1    2.74    0.21 
   6   8   1    2.58    0.24 
   6   8   1    3.23    0.27 
  -7  -8  -1   -0.12    0.19 
   7   8   1   -0.19    0.18 
   7   8   1    0.35    0.29 
   7   8   1   -0.83    0.28 
  -8  -8  -1    1.72    0.29 
   4  -9  -1    4.06    0.39 
   4  -9  -1    4.10    0.14 
  -4   9   1    3.78    0.24 
   3  -9  -1    7.25    0.15 
   3  -9  -1    7.07    0.16 
   3  -9  -1    7.32    0.35 
  -3   9   1    8.21    0.25 
   2  -9  -1    0.28    0.10 
   2  -9  -1   -0.05    0.11 
   2  -9  -1    0.00    0.11 
  -2   9   1    0.17    0.18 
   1  -9  -1   13.88    0.18 
   1  -9  -1   13.49    0.18 
   1  -9  -1   13.69    0.18 
   1  -9  -1   12.45    0.19 
  -1   9   1   14.40    0.22 
  -1   9   1   12.91    0.15 
   0  -9  -1   20.38    0.26 
   0  -9  -1   20.20    0.27 
   0  -9  -1   19.84    0.27 
   0  -9  -1   18.85    0.29 
   0   9   1   20.04    0.26 
   0   9   1   20.39    0.32 
   0   9   1   19.73    0.22 
   0   9   1   19.61    0.24 
   0   9   1   20.12    0.22 
  -1  -9  -1   24.39    0.34 
  -1  -9  -1   23.71    0.33 
  -1  -9  -1   23.25    0.33 
  -1  -9  -1   23.30    0.32 
   1   9   1   23.87    0.33 
   1   9   1   24.82    0.32 
   1   9   1   23.90    0.31 
   1   9   1   23.87    0.33 
   1   9   1   24.00    0.32 
   1   9   1   23.53    0.38 
  -2  -9  -1   17.57    0.24 
  -2  -9  -1   17.29    0.24 
  -2  -9  -1   17.80    0.26 
   2   9   1   17.69    0.22 
   2   9   1   17.74    0.27 
   2   9   1   17.63    0.23 
   2   9   1   17.73    0.25 
   2   9   1   16.42    0.23 
  -3  -9  -1   13.74    0.25 
  -3  -9  -1   13.90    0.24 
  -3  -9  -1   13.08    0.20 
   3   9   1   14.33    0.25 
   3   9   1   12.68    0.23 
   3   9   1   12.97    0.25 
   3   9   1   13.38    0.23 
  -4  -9  -1    1.22    0.16 
  -4  -9  -1    0.88    0.14 
  -4  -9  -1    0.92    0.19 
   4   9   1    1.05    0.17 
   4   9   1    0.45    0.15 
   4   9   1    1.37    0.18 
   4   9   1    0.71    0.15 
  -5  -9  -1    4.75    0.23 
  -5  -9  -1    4.79    0.24 
   5   9   1    5.13    0.22 
   5   9   1    4.64    0.24 
   5   9   1    4.39    0.20 
   5   9   1    4.28    0.22 
  -6  -9  -1    2.82    0.15 
  -6  -9  -1    2.35    0.26 
  -6  -9  -1    2.86    0.20 
   6   9   1    2.75    0.25 
   6   9   1    3.08    0.23 
   6   9   1    2.66    0.24 
  -7  -9  -1    0.91    0.20 
   7   9   1    1.25    0.28 
   7   9   1    0.77    0.26 
   4 -10  -1    3.66    0.15 
  -4  10   1    3.01    0.22 
   3 -10  -1    8.52    0.17 
   3 -10  -1    8.63    0.39 
  -3  10   1    9.05    0.27 
   2 -10  -1    6.68    0.18 
  -2  10   1    7.25    0.25 
   1 -10  -1    0.62    0.12 
   1 -10  -1    0.86    0.12 
   1 -10  -1    0.59    0.12 
  -1  10   1    1.08    0.16 
   0 -10  -1    4.06    0.14 
   0 -10  -1    4.18    0.13 
   0 -10  -1    4.01    0.14 
   0  10   1    3.78    0.16 
   0  10   1    3.91    0.10 
   0  10   1    3.94    0.07 
   0  10   1    3.72    0.09 
   0  10   1    3.56    0.19 
  -1 -10  -1   31.50    0.35 
  -1 -10  -1   32.84    0.36 
  -1 -10  -1   31.92    0.35 
  -1 -10  -1   32.12    0.37 
   1  10   1   33.04    0.34 
   1  10   1   32.02    0.33 
   1  10   1   33.04    0.34 
   1  10   1   32.58    0.33 
   1  10   1   32.42    0.40 
  -2 -10  -1   10.55    0.21 
  -2 -10  -1   10.18    0.23 
  -2 -10  -1    9.85    0.20 
   2  10   1   10.44    0.21 
   2  10   1    9.24    0.18 
   2  10   1   10.10    0.19 
   2  10   1   10.77    0.26 
  -3 -10  -1    1.41    0.19 
  -3 -10  -1    1.43    0.14 
   3  10   1    0.48    0.16 
   3  10   1    1.68    0.18 
   3  10   1    0.98    0.18 
   3  10   1    1.08    0.15 
  -4 -10  -1    1.17    0.16 
  -4 -10  -1    0.92    0.20 
   4  10   1    1.21    0.19 
   4  10   1    0.91    0.17 
   4  10   1    0.44    0.14 
  -5 -10  -1    1.64    0.18 
  -5 -10  -1    1.07    0.22 
   5  10   1    2.34    0.19 
   5  10   1    1.41    0.18 
   5  10   1    1.66    0.17 
   5  10   1    1.69    0.24 
  -6 -10  -1    1.63    0.22 
   6  10   1    1.45    0.24 
   6  10   1    1.68    0.30 
   6  10   1    1.78    0.23 
   6  10   1    1.47    0.23 
  -7 -10  -1    0.39    0.22 
   7  10   1    0.31    0.22 
   3 -11  -1    3.30    0.15 
   3 -11  -1    3.19    0.37 
  -3  11   1    2.63    0.26 
   2 -11  -1    5.09    0.16 
  -2  11   1    5.83    0.26 
   1 -11  -1    4.89    0.15 
   1 -11  -1    4.77    0.16 
  -1  11   1    5.46    0.22 
   0 -11  -1    0.36    0.12 
   0 -11  -1    0.54    0.15 
   0  11   1    0.96    0.18 
   0  11   1    0.54    0.21 
  -1 -11  -1    6.02    0.21 
  -1 -11  -1    6.61    0.19 
   1  11   1    6.38    0.16 
   1  11   1    6.73    0.20 
   1  11   1    6.88    0.25 
  -2 -11  -1    0.90    0.15 
  -2 -11  -1    0.97    0.19 
   2  11   1    1.26    0.23 
   2  11   1    1.01    0.16 
   2  11   1    1.19    0.17 
  -3 -11  -1    0.73    0.20 
  -3 -11  -1    0.94    0.17 
   3  11   1    1.70    0.23 
   3  11   1    0.55    0.18 
  -4 -11  -1    2.90    0.22 
  -4 -11  -1    2.54    0.16 
   4  11   1    3.14    0.20 
  -5 -11  -1   -0.65    0.30 
   5  11   1   -0.03    0.22 
   6  11   1    1.61    0.24 
   6  11   1    1.27    0.21 
  -7 -11  -1    0.51    0.27 
   7  11   1    0.51    0.24 
   7  11   1    0.11    0.28 
   2 -12  -1    1.35    0.15 
   2 -12  -1    1.37    0.33 
  -2  12   1    1.21    0.24 
   1 -12  -1    4.29    0.16 
  -1  12   1    5.12    0.24 
   0 -12  -1    5.68    0.18 
   0 -12  -1    5.74    0.20 
   0  12   1    6.24    0.22 
   0  12   1    6.74    0.28 
  -1 -12  -1    1.01    0.20 
  -1 -12  -1    1.03    0.17 
   1  12   1    1.06    0.19 
   1  12   1    1.59    0.27 
  -2 -12  -1    2.19    0.23 
  -2 -12  -1    2.03    0.20 
   2  12   1    2.14    0.18 
   2  12   1    1.99    0.18 
   2  12   1    2.35    0.24 
  -3 -12  -1    0.88    0.24 
  -3 -12  -1    0.89    0.25 
   3  12   1    1.48    0.25 
   3  12   1    0.51    0.19 
  -4 -12  -1    2.91    0.26 
  -4 -12  -1    3.15    0.21 
   4  12   1    3.20    0.24 
   4  12   1    3.33    0.24 
  -5 -12  -1    4.07    0.37 
  -5 -12  -1    3.94    0.23 
   5  12   1    3.96    0.27 
  -6 -12  -1    1.15    0.25 
   6  12   1    1.14    0.26 
   0 -13  -1    0.80    0.19 
   0  13   1    0.98    0.27 
   0  13   1    1.12    0.22 
  -1 -13  -1    0.29    0.20 
  -1 -13  -1    0.77    0.20 
   1  13   1    0.64    0.19 
   1  13   1    0.53    0.27 
  -2 -13  -1    0.07    0.23 
  -2 -13  -1   -0.13    0.22 
   2  13   1    0.04    0.19 
   2  13   1    0.37    0.28 
   2  13   1   -0.10    0.17 
  -3 -13  -1    0.44    0.20 
  -3 -13  -1    0.34    0.25 
   3  13   1    0.54    0.21 
   3  13   1    0.41    0.24 
  -4 -13  -1    1.92    0.31 
   4  13   1    1.43    0.23 
   4  13   1    1.81    0.28 
  -5 -13  -1    1.59    0.23 
   5  13   1    1.07    0.26 
   5  13   1    1.71    0.27 
  -2 -14  -1    0.94    0.26 
   2  14   1    0.65    0.20 
   2  14   1    1.34    0.29 
  -3 -14  -1    1.94    0.24 
  -3 -14  -1    2.50    0.23 
   3  14   1    2.78    0.29 
   3  14   1    2.23    0.24 
   4  14   1    0.54    0.27 
   5  13  -2    0.72    0.31 
   4  13  -2    1.07    0.24 
   4  13  -2    1.61    0.30 
  -4 -13   2    0.88    0.22 
  -4 -13   2    1.01    0.29 
   3  13  -2    0.59    0.21 
   3  13  -2    1.02    0.28 
  -3 -13   2    0.42    0.27 
  -3 -13   2    0.34    0.20 
   2  13  -2    0.01    0.21 
   2  13  -2    0.36    0.29 
  -2 -13   2    0.48    0.21 
  -2 -13   2    0.19    0.24 
   1  13  -2    2.35    0.23 
   1  13  -2    3.04    0.31 
   0  13  -2    3.38    0.35 
   6  12  -2    0.03    0.30 
   5  12  -2    0.31    0.27 
   4  12  -2    0.07    0.26 
  -4 -12   2   -0.30    0.24 
  -4 -12   2    0.10    0.28 
   3  12  -2    2.44    0.21 
   3  12  -2    3.11    0.29 
  -3 -12   2    2.87    0.27 
  -3 -12   2    2.59    0.25 
   2  12  -2    7.17    0.22 
   2  12  -2    8.51    0.30 
   2  12  -2    7.31    0.20 
  -2 -12   2    7.51    0.23 
  -2 -12   2    7.44    0.25 
   1  12  -2    2.99    0.21 
   1  12  -2    2.33    0.27 
  -1 -12   2    2.60    0.19 
   0  12  -2    2.06    0.22 
   0  12  -2    2.71    0.29 
   0 -12   2    2.01    0.20 
  -1  12  -2    3.80    0.28 
  -1  12  -2    3.52    0.34 
   1 -12   2    2.68    0.20 
   6  11  -2    0.06    0.23 
   6  11  -2   -0.23    0.28 
  -6 -11   2    0.19    0.27 
   5  11  -2    0.34    0.19 
   5  11  -2    0.42    0.26 
  -5 -11   2    0.04    0.24 
  -5 -11   2   -0.31    0.26 
   4  11  -2    0.19    0.26 
  -4 -11   2   -0.02    0.22 
  -4 -11   2   -0.19    0.24 
   3  11  -2    8.99    0.27 
  -3 -11   2    9.88    0.24 
  -3 -11   2    9.69    0.22 
   2  11  -2   19.50    0.38 
   2  11  -2   19.05    0.31 
   2  11  -2   18.37    0.30 
  -2 -11   2   20.32    0.38 
  -2 -11   2   19.20    0.35 
  -2 -11   2   19.11    0.34 
   1  11  -2    6.43    0.21 
   1  11  -2    6.74    0.28 
  -1 -11   2    5.78    0.24 
  -1 -11   2    6.54    0.20 
  -1 -11   2    6.37    0.23 
   0  11  -2    4.11    0.22 
   0  11  -2    3.74    0.26 
   0 -11   2    3.24    0.21 
   0 -11   2    3.33    0.20 
  -1  11  -2    0.65    0.21 
  -1  11  -2    2.16    0.28 
   1 -11   2    1.34    0.16 
  -2  11  -2    3.85    0.23 
   2 -11   2    3.39    0.14 
   7  10  -2    1.15    0.27 
  -7 -10   2    0.40    0.24 
   6  10  -2   10.89    0.29 
  -6 -10   2   10.27    0.30 
  -6 -10   2    9.69    0.35 
   5  10  -2    0.67    0.19 
   5  10  -2    0.47    0.24 
  -5 -10   2    0.52    0.26 
  -5 -10   2    0.73    0.26 
   4  10  -2    4.37    0.18 
   4  10  -2    4.86    0.25 
  -4 -10   2    4.92    0.24 
  -4 -10   2    4.94    0.21 
   3  10  -2    1.30    0.23 
  -3 -10   2    0.67    0.19 
  -3 -10   2    0.67    0.18 
   2  10  -2    8.70    0.19 
   2  10  -2   10.04    0.29 
   2  10  -2    8.80    0.22 
   2  10  -2    8.30    0.21 
   2  10  -2    9.12    0.21 
  -2 -10   2   10.39    0.28 
  -2 -10   2    9.70    0.23 
  -2 -10   2   10.27    0.26 
   1  10  -2    2.52    0.15 
   1  10  -2    4.06    0.27 
   1  10  -2    2.39    0.19 
   1  10  -2    2.61    0.20 
  -1 -10   2    3.09    0.24 
  -1 -10   2    2.27    0.18 
  -1 -10   2    2.47    0.22 
   0  10  -2    1.19    0.11 
   0  10  -2    1.55    0.18 
   0  10  -2    1.55    0.22 
   0 -10   2    1.44    0.15 
   0 -10   2    1.23    0.16 
   0 -10   2    0.92    0.18 
  -1  10  -2    0.30    0.24 
  -1  10  -2   -0.41    0.18 
   1 -10   2    0.22    0.12 
   1 -10   2    0.05    0.14 
   1 -10   2    0.03    0.14 
   1 -10   2   -0.92    0.22 
  -2  10  -2    0.28    0.22 
   2 -10   2    0.07    0.11 
  -3  10  -2    0.88    0.22 
   3 -10   2    1.17    0.11 
   3 -10   2    1.09    0.35 
   7   9  -2    1.19    0.25 
  -7  -9   2    1.27    0.32 
   6   9  -2    2.36    0.21 
   6   9  -2    1.34    0.23 
   6   9  -2    2.48    0.26 
  -6  -9   2    1.57    0.26 
  -6  -9   2    1.47    0.27 
   5   9  -2    7.63    0.26 
   5   9  -2    7.47    0.22 
   5   9  -2    7.71    0.24 
  -5  -9   2    7.73    0.24 
  -5  -9   2    7.82    0.29 
   4   9  -2   28.43    0.41 
   4   9  -2   29.74    0.41 
   4   9  -2   28.97    0.37 
  -4  -9   2   29.20    0.36 
  -4  -9   2   27.11    0.37 
   3   9  -2   15.65    0.24 
   3   9  -2   14.30    0.27 
   3   9  -2   14.00    0.22 
  -3  -9   2   14.89    0.24 
  -3  -9   2   14.67    0.22 
  -3  -9   2   14.75    0.24 
   2   9  -2    6.69    0.20 
   2   9  -2    6.94    0.13 
   2   9  -2    6.82    0.14 
   2   9  -2    6.50    0.14 
   2   9  -2    6.65    0.11 
  -2  -9   2    6.95    0.15 
  -2  -9   2    7.20    0.16 
  -2  -9   2    6.97    0.19 
  -2  -9   2    7.00    0.14 
   1   9  -2   15.57    0.41 
   1   9  -2   15.96    0.46 
   1   9  -2   14.08    0.38 
   1   9  -2   14.77    0.44 
   1   9  -2   14.62    0.39 
   1   9  -2   13.87    0.39 
  -1  -9   2   16.17    0.41 
  -1  -9   2   14.59    0.40 
  -1  -9   2   15.72    0.42 
  -1  -9   2   15.17    0.45 
   0   9  -2    7.67    0.24 
   0   9  -2    6.19    0.12 
   0   9  -2    7.04    0.19 
   0  -9   2    6.72    0.22 
   0  -9   2    6.99    0.16 
   0  -9   2    7.40    0.18 
   0  -9   2    6.00    0.16 
  -1   9  -2   10.72    0.24 
  -1   9  -2   11.18    0.21 
   1  -9   2   10.50    0.20 
   1  -9   2   10.75    0.16 
   1  -9   2   10.92    0.16 
   1  -9   2   10.92    0.16 
  -2   9  -2    0.39    0.20 
   2  -9   2    0.37    0.11 
   2  -9   2    0.80    0.13 
   2  -9   2    0.43    0.18 
  -3   9  -2    1.56    0.23 
   3  -9   2    1.46    0.34 
  -4   9  -2    1.83    0.26 
   4  -9   2    1.40    0.36 
   8   8  -2    3.60    0.34 
  -8  -8   2    2.36    0.30 
   7   8  -2    0.68    0.26 
   7   8  -2    0.19    0.22 
   7   8  -2    0.42    0.28 
  -7  -8   2    0.12    0.22 
   6   8  -2    1.64    0.19 
   6   8  -2    1.33    0.21 
   6   8  -2    2.11    0.24 
  -6  -8   2    1.30    0.24 
  -6  -8   2    1.15    0.20 
   5   8  -2    0.57    0.18 
   5   8  -2    0.28    0.16 
   5   8  -2    0.40    0.19 
  -5  -8   2    0.60    0.17 
  -5  -8   2    0.76    0.21 
  -5  -8   2    0.63    0.18 
   4   8  -2   27.49    0.41 
   4   8  -2   26.50    0.40 
   4   8  -2   27.11    0.39 
  -4  -8   2   26.78    0.42 
  -4  -8   2   27.52    0.41 
  -4  -8   2   26.86    0.39 
   3   8  -2   46.95    0.50 
   3   8  -2   44.08    0.53 
   3   8  -2   45.46    0.51 
  -3  -8   2   45.31    0.50 
  -3  -8   2   45.21    0.51 
  -3  -8   2   47.14    0.51 
   2   8  -2    1.98    0.12 
   2   8  -2    2.25    0.18 
   2   8  -2    2.78    0.14 
   2   8  -2    2.92    0.13 
   2   8  -2    2.62    0.16 
  -2  -8   2    2.87    0.15 
  -2  -8   2    2.64    0.15 
  -2  -8   2    2.82    0.15 
  -2  -8   2    3.34    0.20 
   1   8  -2    8.51    0.12 
   1   8  -2    8.18    0.09 
   1   8  -2    8.44    0.16 
   1   8  -2    8.44    0.13 
   1   8  -2    8.39    0.11 
   1   8  -2    8.27    0.10 
  -1  -8   2    8.52    0.10 
  -1  -8   2    8.32    0.11 
  -1  -8   2    8.90    0.16 
  -1  -8   2    8.39    0.12 
   0   8  -2   16.19    0.31 
   0   8  -2   17.99    0.39 
   0   8  -2   18.65    0.35 
   0  -8   2   17.16    0.33 
   0  -8   2   15.33    0.33 
   0  -8   2   17.04    0.38 
   0  -8   2   16.05    0.31 
   0  -8   2   16.45    0.34 
  -1   8  -2    7.15    0.24 
  -1   8  -2    6.94    0.20 
   1  -8   2    6.69    0.16 
   1  -8   2    6.58    0.14 
   1  -8   2    6.60    0.15 
   1  -8   2    6.42    0.13 
   1  -8   2    6.73    0.20 
  -2   8  -2    3.19    0.19 
   2  -8   2    3.43    0.19 
   2  -8   2    3.13    0.12 
   2  -8   2    3.39    0.13 
   2  -8   2    3.09    0.11 
  -3   8  -2    0.58    0.20 
   3  -8   2    0.07    0.26 
   3  -8   2    0.59    0.19 
  -4   8  -2    1.15    0.21 
  -4   8  -2    1.98    0.27 
   4  -8   2    2.58    0.29 
   4  -8   2    1.60    0.32 
  -5   8  -2    1.62    0.26 
   5  -8   2    2.40    0.39 
   8   7  -2    4.60    0.33 
   8   7  -2    4.49    0.26 
  -8  -7   2    4.28    0.27 
   7   7  -2    4.04    0.21 
   7   7  -2    4.62    0.27 
   7   7  -2    4.94    0.30 
  -7  -7   2    4.41    0.23 
   6   7  -2    1.47    0.21 
   6   7  -2    1.83    0.22 
   6   7  -2    1.07    0.18 
  -6  -7   2    0.81    0.22 
  -6  -7   2    1.20    0.20 
   5   7  -2    1.50    0.15 
   5   7  -2    1.35    0.17 
   5   7  -2    1.44    0.17 
   5   7  -2    1.27    0.18 
  -5  -7   2    1.36    0.19 
  -5  -7   2    1.32    0.15 
  -5  -7   2    1.23    0.16 
   4   7  -2    1.15    0.15 
   4   7  -2    1.88    0.17 
   4   7  -2    1.01    0.17 
   4   7  -2    2.04    0.17 
  -4  -7   2    1.18    0.17 
  -4  -7   2    1.87    0.16 
  -4  -7   2    1.72    0.17 
   3   7  -2   41.57    0.54 
   3   7  -2   43.05    0.53 
   3   7  -2   42.63    0.53 
   3   7  -2   40.14    0.55 
  -3  -7   2   41.90    0.53 
  -3  -7   2   40.99    0.57 
  -3  -7   2   41.50    0.54 
  -3  -7   2   41.89    0.53 
   2   7  -2    3.79    0.12 
   2   7  -2    3.56    0.16 
   2   7  -2    3.58    0.12 
   2   7  -2    3.29    0.15 
   2   7  -2    3.12    0.15 
  -2  -7   2    3.72    0.11 
  -2  -7   2    3.91    0.17 
  -2  -7   2    3.72    0.13 
  -2  -7   2    3.61    0.14 
   1   7  -2    0.13    0.10 
   1   7  -2    0.24    0.11 
   1   7  -2    0.19    0.13 
   1   7  -2   -0.02    0.09 
   1   7  -2    0.06    0.08 
   1   7  -2    0.02    0.09 
  -1  -7   2    0.28    0.08 
  -1  -7   2    0.02    0.09 
  -1  -7   2   -0.03    0.09 
  -1  -7   2    0.16    0.06 
  -1  -7   2    0.61    0.14 
   0   7  -2    6.01    0.14 
   0   7  -2    6.15    0.10 
   0   7  -2    5.83    0.12 
   0   7  -2    5.75    0.07 
   0  -7   2    5.88    0.09 
   0  -7   2    5.85    0.07 
   0  -7   2    5.94    0.06 
   0  -7   2    5.97    0.08 
   0  -7   2    5.55    0.12 
  -1   7  -2    1.13    0.15 
  -1   7  -2    0.61    0.14 
   1  -7   2    0.84    0.13 
   1  -7   2    1.28    0.09 
   1  -7   2    0.93    0.09 
   1  -7   2    0.78    0.06 
   1  -7   2    0.87    0.08 
  -2   7  -2    7.67    0.21 
  -2   7  -2    7.26    0.21 
   2  -7   2    7.13    0.15 
   2  -7   2    7.06    0.22 
   2  -7   2    6.71    0.14 
   2  -7   2    7.01    0.16 
  -3   7  -2   16.62    0.28 
  -3   7  -2   17.95    0.28 
   3  -7   2   18.17    0.33 
   3  -7   2   16.92    0.37 
  -4   7  -2    3.16    0.22 
  -4   7  -2    2.34    0.24 
   4  -7   2    3.51    0.25 
   4  -7   2    2.69    0.32 
  -5   7  -2    0.56    0.25 
  -5   7  -2    0.06    0.22 
   5  -7   2    1.06    0.35 
   5  -7   2    1.73    0.30 
   8   6  -2   -0.91    0.36 
   8   6  -2    0.15    0.20 
   8   6  -2   -0.27    0.30 
  -8  -6   2    0.24    0.22 
   7   6  -2   13.41    0.32 
   7   6  -2   13.51    0.35 
   7   6  -2   12.38    0.39 
   7   6  -2   13.15    0.27 
  -7  -6   2   13.45    0.28 
   6   6  -2    7.03    0.26 
   6   6  -2    7.06    0.29 
  -6  -6   2    6.94    0.31 
  -6  -6   2    6.34    0.19 
  -6  -6   2    6.97    0.26 
   5   6  -2   11.73    0.26 
   5   6  -2   11.59    0.26 
   5   6  -2   11.20    0.26 
  -5  -6   2   11.71    0.26 
  -5  -6   2   11.16    0.19 
  -5  -6   2   11.39    0.27 
  -5  -6   2   11.33    0.28 
   4   6  -2    3.66    0.17 
   4   6  -2    4.33    0.18 
   4   6  -2    4.06    0.16 
   4   6  -2    4.18    0.17 
  -4  -6   2    3.99    0.15 
  -4  -6   2    4.20    0.18 
  -4  -6   2    4.16    0.11 
  -4  -6   2    3.86    0.16 
   3   6  -2   18.25    0.31 
   3   6  -2   16.84    0.34 
   3   6  -2   16.39    0.30 
   3   6  -2   16.45    0.28 
   3   6  -2   17.38    0.30 
   3   6  -2   18.92    0.30 
  -3  -6   2   17.63    0.51 
  -3  -6   2   18.33    0.30 
  -3  -6   2   17.97    0.33 
  -3  -6   2   17.93    0.30 
  -3  -6   2   17.74    0.30 
   2   6  -2   48.53    0.59 
   2   6  -2   48.64    0.59 
   2   6  -2   48.42    0.59 
   2   6  -2   47.23    0.62 
   2   6  -2   48.28    0.59 
   2   6  -2   48.55    0.61 
  -2  -6   2   48.07    0.59 
  -2  -6   2   48.81    0.60 
  -2  -6   2   48.02    0.62 
  -2  -6   2   47.75    0.59 
  -2  -6   2   47.78    0.59 
   1   6  -2    2.46    0.12 
   1   6  -2    2.86    0.12 
   1   6  -2    2.86    0.16 
   1   6  -2    2.39    0.15 
   1   6  -2    2.80    0.12 
   1   6  -2    2.91    0.14 
  -1  -6   2    2.22    0.11 
  -1  -6   2    2.68    0.13 
  -1  -6   2    3.27    0.14 
  -1  -6   2    3.78    0.20 
  -1  -6   2    3.37    0.14 
   0   6  -2    0.90    0.07 
   0   6  -2    0.94    0.08 
   0   6  -2    0.97    0.06 
   0   6  -2    1.43    0.12 
   0   6  -2    1.04    0.13 
   0   6  -2    1.07    0.07 
   0   6  -2    1.09    0.12 
   0  -6   2    1.00    0.08 
   0  -6   2    1.01    0.11 
   0  -6   2    1.09    0.09 
   0  -6   2    0.97    0.09 
   0  -6   2    0.91    0.12 
   0  -6   2    1.06    0.07 
  -1   6  -2    1.24    0.12 
  -1   6  -2    1.27    0.11 
  -1   6  -2    1.16    0.09 
   1  -6   2    1.43    0.06 
   1  -6   2    1.51    0.12 
   1  -6   2    1.35    0.06 
   1  -6   2    1.36    0.07 
   1  -6   2    1.18    0.04 
  -2   6  -2   -0.10    0.13 
  -2   6  -2    0.15    0.14 
   2  -6   2    0.19    0.06 
   2  -6   2    0.12    0.06 
   2  -6   2    0.72    0.14 
   2  -6   2    0.07    0.06 
  -3   6  -2   15.03    0.20 
  -3   6  -2   14.54    0.20 
   3  -6   2   13.39    0.10 
   3  -6   2   13.80    0.10 
   3  -6   2   14.25    0.29 
  -4   6  -2   33.97    0.38 
  -4   6  -2   34.34    0.41 
   4  -6   2   34.86    0.59 
  -5   6  -2    1.94    0.24 
  -5   6  -2    2.98    0.22 
   5  -6   2    3.11    0.36 
  -6   6  -2    0.29    0.24 
  -6   6  -2    0.62    0.23 
   6  -6   2    1.50    0.37 
   8   5  -2    0.33    0.20 
  -8  -5   2    0.35    0.20 
   7   5  -2   -0.07    0.24 
   7   5  -2    0.08    0.19 
   7   5  -2   -0.79    0.32 
  -7  -5   2   -0.07    0.20 
  -7  -5   2    0.04    0.13 
   6   5  -2    8.65    0.23 
   6   5  -2    8.74    0.25 
   6   5  -2    7.30    0.32 
  -6  -5   2    8.08    0.25 
  -6  -5   2    7.99    0.17 
  -6  -5   2    8.69    0.23 
   5   5  -2   14.60    0.24 
   5   5  -2   13.95    0.31 
   5   5  -2   15.33    0.26 
   5   5  -2   14.18    0.25 
  -5  -5   2   14.74    0.20 
  -5  -5   2   15.33    0.27 
  -5  -5   2   14.74    0.25 
   4   5  -2   18.86    0.34 
   4   5  -2   18.27    0.34 
   4   5  -2   17.37    0.34 
  -4  -5   2   17.95    0.30 
  -4  -5   2   17.79    0.33 
  -4  -5   2   19.15    0.34 
  -4  -5   2   18.96    0.33 
   3   5  -2    2.61    0.13 
   3   5  -2    2.26    0.11 
   3   5  -2    1.97    0.14 
   3   5  -2    2.32    0.12 
   3   5  -2    2.51    0.12 
  -3  -5   2    2.77    0.13 
  -3  -5   2    2.05    0.16 
  -3  -5   2    3.02    0.12 
   2   5  -2    9.81    0.29 
   2   5  -2   10.05    0.25 
   2   5  -2    8.78    0.24 
   2   5  -2   10.12    0.25 
   2   5  -2    9.27    0.24 
  -2  -5   2   10.38    0.25 
  -2  -5   2   10.77    0.26 
  -2  -5   2   10.02    0.25 
  -2  -5   2    9.20    0.24 
  -2  -5   2    9.87    0.33 
  -2  -5   2   10.03    0.29 
   1   5  -2   29.67    0.20 
   1   5  -2   28.97    0.24 
   1   5  -2   28.83    0.20 
   1   5  -2   29.63    0.24 
   1   5  -2   29.41    0.20 
   1   5  -2   29.81    0.21 
   1   5  -2   29.26    0.20 
  -1  -5   2   30.57    0.24 
  -1  -5   2   29.82    0.21 
  -1  -5   2   28.64    0.19 
  -1  -5   2   29.91    0.21 
  -1  -5   2   29.60    0.20 
   0   5  -2    2.68    0.20 
   0   5  -2    2.05    0.17 
   0   5  -2    2.62    0.14 
   0   5  -2    2.44    0.16 
   0   5  -2    2.62    0.14 
   0   5  -2    2.41    0.13 
   0   5  -2    2.25    0.13 
   0  -5   2    2.55    0.18 
   0  -5   2    2.16    0.13 
   0  -5   2    2.39    0.18 
   0  -5   2    2.53    0.14 
   0  -5   2    2.34    0.15 
   0  -5   2    2.77    0.15 
  -1   5  -2   19.15    0.33 
  -1   5  -2   19.32    0.33 
  -1   5  -2   18.69    0.35 
   1  -5   2   18.15    0.34 
   1  -5   2   18.51    0.31 
   1  -5   2   19.13    0.31 
   1  -5   2   18.51    0.31 
   1  -5   2   18.90    0.36 
  -2   5  -2   34.73    0.28 
  -2   5  -2   34.84    0.28 
   2  -5   2   33.44    0.24 
   2  -5   2   35.48    0.32 
  -3   5  -2    2.31    0.18 
  -3   5  -2    2.31    0.19 
   3  -5   2    2.13    0.24 
  -4   5  -2   16.62    0.23 
  -4   5  -2   15.47    0.24 
   4  -5   2   15.66    0.31 
  -5   5  -2    9.47    0.31 
  -5   5  -2    8.92    0.36 
   5  -5   2    8.79    0.42 
  -6   5  -2    1.21    0.25 
  -6   5  -2    0.84    0.21 
   6  -5   2    1.25    0.35 
   8   4  -2    0.02    0.26 
   8   4  -2    0.57    0.22 
  -8  -4   2    0.34    0.19 
  -8  -4   2    0.32    0.14 
   7   4  -2   -0.01    0.24 
   7   4  -2   -0.68    0.30 
   7   4  -2    0.38    0.17 
  -7  -4   2    0.18    0.17 
  -7  -4   2    0.44    0.14 
   6   4  -2   -0.47    0.25 
   6   4  -2   -0.07    0.15 
   6   4  -2   -0.10    0.19 
   6   4  -2    0.00    0.17 
  -6  -4   2   -0.12    0.14 
  -6  -4   2    0.00    0.17 
  -6  -4   2   -0.17    0.11 
   5   4  -2   10.55    0.20 
   5   4  -2    9.23    0.18 
   5   4  -2    8.36    0.23 
   5   4  -2    9.34    0.18 
  -5  -4   2   10.20    0.18 
  -5  -4   2    9.37    0.14 
  -5  -4   2    9.44    0.18 
   4   4  -2   31.20    0.48 
   4   4  -2   32.78    0.40 
   4   4  -2   32.07    0.40 
   4   4  -2   32.71    0.40 
  -4  -4   2   30.39    0.46 
  -4  -4   2   32.04    0.36 
  -4  -4   2   31.94    0.38 
  -4  -4   2   32.00    0.40 
  -4  -4   2   31.49    0.39 
  -4  -4   2   32.33    0.39 
   3   4  -2    1.42    0.12 
   3   4  -2    1.20    0.12 
   3   4  -2    1.05    0.11 
   3   4  -2    0.92    0.11 
   3   4  -2    1.12    0.14 
  -3  -4   2    0.88    0.09 
  -3  -4   2    1.41    0.12 
  -3  -4   2    1.24    0.07 
  -3  -4   2    1.48    0.11 
  -3  -4   2    0.94    0.15 
  -3  -4   2    0.77    0.10 
   2   4  -2   42.59    0.43 
   2   4  -2   42.06    0.43 
   2   4  -2   42.80    0.46 
   2   4  -2   41.92    0.43 
   2   4  -2   42.00    0.43 
  -2  -4   2   41.98    0.43 
  -2  -4   2   41.78    0.43 
  -2  -4   2   41.69    0.43 
  -2  -4   2   42.72    0.49 
  -2  -4   2   41.43    0.42 
  -2  -4   2   42.22    0.45 
   1   4  -2    1.11    0.10 
   1   4  -2    1.21    0.12 
   1   4  -2    1.14    0.10 
   1   4  -2    1.33    0.12 
   1   4  -2    1.18    0.10 
  -1  -4   2    1.53    0.10 
  -1  -4   2    1.16    0.10 
  -1  -4   2    1.18    0.10 
   0   4  -2   11.62    0.14 
   0   4  -2   11.87    0.15 
   0   4  -2   11.70    0.17 
   0   4  -2   11.86    0.14 
   0   4  -2   12.12    0.14 
   0   4  -2   12.31    0.15 
   0   4  -2   12.17    0.14 
   0   4  -2   11.68    0.20 
   0  -4   2   11.44    0.19 
   0  -4   2   11.70    0.17 
   0  -4   2   11.97    0.15 
   0  -4   2   11.51    0.14 
   0  -4   2   12.00    0.15 
   0  -4   2   11.91    0.14 
  -1   4  -2    9.86    0.28 
  -1   4  -2    9.40    0.26 
  -1   4  -2    9.41    0.27 
   1  -4   2    9.43    0.24 
   1  -4   2    9.10    0.27 
   1  -4   2    8.93    0.24 
   1  -4   2   10.13    0.30 
   1  -4   2    8.31    0.24 
  -2   4  -2   63.36    0.59 
  -2   4  -2   63.58    0.59 
   2  -4   2   61.31    0.59 
  -3   4  -2   43.45    0.41 
  -3   4  -2   45.22    0.43 
   3  -4   2   44.92    0.51 
  -4   4  -2    1.58    0.18 
  -4   4  -2    1.90    0.16 
   4  -4   2    1.32    0.23 
   4  -4   2    1.26    0.06 
  -5   4  -2    8.90    0.27 
  -5   4  -2    9.01    0.22 
   5  -4   2    8.93    0.32 
   5  -4   2    9.65    0.17 
  -6   4  -2    2.08    0.31 
  -6   4  -2    1.28    0.20 
   6  -4   2    1.35    0.12 
   6  -4   2    1.46    0.33 
   8   3  -2    3.13    0.23 
   8   3  -2    3.53    0.28 
  -8  -3   2    3.40    0.16 
  -8  -3   2    2.98    0.17 
   7   3  -2    1.33    0.22 
   7   3  -2    1.61    0.17 
   7   3  -2    0.84    0.32 
  -7  -3   2    1.24    0.14 
  -7  -3   2    1.71    0.14 
  -7  -3   2    1.44    0.17 
   6   3  -2    4.28    0.22 
   6   3  -2    3.62    0.18 
   6   3  -2    4.15    0.22 
   6   3  -2    3.31    0.29 
  -6  -3   2    3.77    0.17 
  -6  -3   2    3.97    0.15 
  -6  -3   2    3.51    0.18 
  -6  -3   2    2.78    0.14 
   5   3  -2    0.04    0.13 
   5   3  -2   -0.05    0.12 
   5   3  -2   -0.05    0.19 
   5   3  -2    0.14    0.10 
  -5  -3   2    0.19    0.09 
  -5  -3   2   -0.01    0.09 
  -5  -3   2   -0.14    0.11 
  -5  -3   2    0.01    0.10 
   4   3  -2    9.19    0.12 
   4   3  -2    8.79    0.11 
   4   3  -2    8.71    0.11 
   4   3  -2    8.97    0.16 
   4   3  -2    8.83    0.11 
   4   3  -2    8.43    0.16 
  -4  -3   2    9.13    0.09 
  -4  -3   2    8.34    0.16 
  -4  -3   2    8.87    0.13 
  -4  -3   2    8.69    0.10 
  -4  -3   2    8.72    0.11 
  -4  -3   2    8.90    0.12 
   3   3  -2   10.75    0.16 
   3   3  -2   10.27    0.16 
   3   3  -2   10.07    0.19 
   3   3  -2    9.95    0.16 
   3   3  -2    9.85    0.15 
   3   3  -2   10.38    0.20 
  -3  -3   2   10.50    0.17 
  -3  -3   2   10.81    0.17 
  -3  -3   2   10.32    0.16 
  -3  -3   2   10.98    0.26 
  -3  -3   2    9.99    0.15 
  -3  -3   2   10.30    0.13 
  -2  -3   2   10.86    0.23 
  -2  -3   2   11.17    0.20 
  -2  -3   2   11.47    0.28 
   1   3  -2   37.42    0.44 
   1   3  -2   36.57    0.42 
   1   3  -2   36.92    0.42 
   1   3  -2   35.79    0.42 
  -1  -3   2   38.05    0.44 
  -1  -3   2   36.28    0.41 
  -1  -3   2   37.45    0.42 
  -1  -3   2   35.56    0.42 
  -1  -3   2   36.52    0.42 
   0   3  -2   38.38    0.23 
   0   3  -2   38.65    0.25 
   0   3  -2   38.70    0.20 
   0   3  -2   37.95    0.21 
   0   3  -2   38.34    0.20 
   0   3  -2   37.86    0.20 
   0   3  -2   38.98    0.20 
   0  -3   2   38.40    0.20 
   0  -3   2   38.36    0.20 
   0  -3   2   37.77    0.20 
   0  -3   2   38.52    0.23 
   0  -3   2   38.25    0.24 
   0  -3   2   38.73    0.21 
  -1   3  -2   15.68    0.20 
  -1   3  -2   14.34    0.18 
  -1   3  -2   14.20    0.18 
   1  -3   2   14.64    0.15 
   1  -3   2   14.99    0.19 
   1  -3   2   15.47    0.21 
   1  -3   2   14.89    0.16 
  -2   3  -2   40.38    0.58 
  -2   3  -2   39.38    0.59 
   2  -3   2   42.84    0.59 
  -3   3  -2  107.76    0.83 
  -3   3  -2  106.93    0.83 
   3  -3   2  107.41    0.83 
   3  -3   2  107.79    0.88 
  -4   3  -2    5.93    0.20 
  -4   3  -2    6.33    0.18 
   4  -3   2    6.19    0.14 
   4  -3   2    6.04    0.12 
   4  -3   2    6.21    0.12 
   4  -3   2    6.37    0.25 
  -5   3  -2    3.09    0.15 
  -5   3  -2    2.93    0.19 
   5  -3   2    3.55    0.25 
   5  -3   2    3.59    0.12 
   5  -3   2    3.01    0.07 
  -6   3  -2    4.01    0.26 
  -6   3  -2    4.63    0.23 
   6  -3   2    4.64    0.34 
  -7   3  -2    0.21    0.24 
  -7   3  -2   -0.08    0.21 
   7  -3   2    0.80    0.34 
   8   2  -2    0.87    0.20 
  -8  -2   2    1.10    0.16 
  -8  -2   2    0.97    0.19 
   7   2  -2    0.36    0.31 
   7   2  -2    1.61    0.17 
   7   2  -2    1.59    0.25 
  -7  -2   2    1.79    0.15 
  -7  -2   2    1.43    0.15 
  -7  -2   2    2.12    0.15 
   6   2  -2   20.53    0.35 
   6   2  -2   21.83    0.29 
   6   2  -2   21.68    0.28 
   6   2  -2   21.53    0.27 
  -6  -2   2   20.90    0.27 
  -6  -2   2   22.19    0.26 
  -6  -2   2   22.35    0.26 
  -6  -2   2   22.48    0.25 
   5   2  -2   13.75    0.30 
   5   2  -2   13.82    0.22 
   5   2  -2   14.20    0.23 
   5   2  -2   14.57    0.24 
  -5  -2   2   14.75    0.23 
  -5  -2   2   13.02    0.20 
  -5  -2   2   14.52    0.22 
  -5  -2   2   13.93    0.21 
   4   2  -2    3.45    0.10 
   4   2  -2    3.25    0.10 
   4   2  -2    3.39    0.14 
   4   2  -2    3.30    0.18 
   4   2  -2    3.33    0.11 
   4   2  -2    3.43    0.11 
  -4  -2   2    3.04    0.14 
  -4  -2   2    3.37    0.09 
  -4  -2   2    3.37    0.08 
  -4  -2   2    2.97    0.10 
  -4  -2   2    3.37    0.10 
  -4  -2   2    3.42    0.09 
   3   2  -2    1.92    0.08 
   3   2  -2    1.74    0.10 
   3   2  -2    1.62    0.08 
   3   2  -2    1.84    0.09 
   3   2  -2    1.75    0.12 
   3   2  -2    1.94    0.13 
  -3  -2   2    1.64    0.12 
  -3  -2   2    1.88    0.09 
  -3  -2   2    1.92    0.08 
  -3  -2   2    1.98    0.06 
  -3  -2   2    2.09    0.09 
  -3  -2   2    1.95    0.09 
   2   2  -2    3.92    0.12 
   2   2  -2    3.86    0.14 
   2   2  -2    4.53    0.14 
  -2  -2   2    3.89    0.14 
  -2  -2   2    3.76    0.09 
  -2  -2   2    4.81    0.22 
  -2  -2   2    4.41    0.14 
   1   2  -2  385.80    4.11 
   1   2  -2  388.37    4.12 
   1   2  -2  380.42    4.11 
   1   2  -2  383.09    4.11 
   1   2  -2  375.38    4.10 
  -1  -2   2  381.82    4.11 
  -1  -2   2  386.13    4.12 
  -1  -2   2  387.20    4.11 
  -1  -2   2  384.24    4.11 
  -1  -2   2  391.62    4.13 
  -1  -2   2  382.82    4.11 
   0   2  -2   38.58    0.60 
   0   2  -2   39.17    0.59 
   0   2  -2   38.42    0.61 
   0   2  -2   39.31    0.59 
   0   2  -2   36.43    0.59 
   0  -2   2   38.72    0.61 
   0  -2   2   38.77    0.59 
   0  -2   2   39.83    0.59 
   0  -2   2   38.61    0.59 
   0  -2   2   38.65    0.60 
  -1   2  -2   75.36    0.71 
  -1   2  -2   77.64    0.71 
  -1   2  -2   75.71    0.71 
   1  -2   2   75.34    0.72 
   1  -2   2   75.11    0.71 
  -2   2  -2   24.06    0.36 
  -2   2  -2   23.84    0.35 
   2  -2   2   25.25    0.36 
  -3   2  -2   52.04    0.54 
  -3   2  -2   52.55    0.53 
   3  -2   2   53.74    0.52 
   3  -2   2   53.25    0.54 
   3  -2   2   53.35    0.51 
   3  -2   2   53.84    0.59 
  -4   2  -2   21.73    0.26 
  -4   2  -2   20.58    0.28 
   4  -2   2   20.76    0.22 
   4  -2   2   20.67    0.23 
   4  -2   2   20.39    0.36 
   4  -2   2   20.96    0.22 
   4  -2   2   20.77    0.23 
  -5   2  -2    0.85    0.17 
  -5   2  -2    0.64    0.13 
   5  -2   2    0.77    0.20 
   5  -2   2    1.39    0.11 
   5  -2   2    1.24    0.11 
   5  -2   2    1.02    0.07 
   5  -2   2    0.88    0.07 
  -6   2  -2    4.71    0.22 
  -6   2  -2    5.49    0.20 
   6  -2   2    5.11    0.31 
  -7   2  -2    1.78    0.26 
  -7   2  -2    2.10    0.21 
   7  -2   2    1.81    0.33 
   8   1  -2   -0.26    0.19 
   8   1  -2   -0.15    0.28 
  -8  -1   2   -0.25    0.20 
  -8  -1   2    0.18    0.18 
   7   1  -2   -0.73    0.30 
   7   1  -2    0.29    0.22 
   7   1  -2    0.77    0.16 
  -7  -1   2    0.34    0.15 
  -7  -1   2    1.02    0.17 
   6   1  -2    3.31    0.16 
   6   1  -2    3.03    0.28 
   6   1  -2    2.81    0.18 
   6   1  -2    3.30    0.18 
  -6  -1   2    3.07    0.15 
  -6  -1   2    3.21    0.11 
  -6  -1   2    3.16    0.14 
  -6  -1   2    2.91    0.19 
  -6  -1   2    3.26    0.14 
   5   1  -2   14.65    0.24 
   5   1  -2   14.75    0.24 
   5   1  -2   15.91    0.39 
   5   1  -2   15.47    0.25 
  -5  -1   2   15.03    0.22 
  -5  -1   2   15.58    0.26 
  -5  -1   2   14.80    0.22 
  -5  -1   2   15.17    0.23 
   4   1  -2   10.90    0.15 
   4   1  -2   10.46    0.12 
   4   1  -2   10.80    0.12 
   4   1  -2   10.80    0.12 
   4   1  -2   10.81    0.19 
   4   1  -2   11.25    0.13 
  -4  -1   2   11.16    0.12 
  -4  -1   2   11.08    0.12 
  -4  -1   2   10.45    0.12 
  -4  -1   2   10.25    0.15 
  -4  -1   2   10.33    0.11 
  -4  -1   2   11.20    0.11 
   3   1  -2   21.44    0.26 
   3   1  -2   21.44    0.22 
   3   1  -2   21.84    0.23 
   3   1  -2   21.34    0.31 
   3   1  -2   21.46    0.22 
   3   1  -2   22.13    0.23 
  -3  -1   2   21.53    0.22 
  -3  -1   2   21.24    0.28 
  -3  -1   2   21.58    0.22 
  -3  -1   2   21.22    0.22 
  -3  -1   2   21.22    0.21 
   2   1  -2   64.95    1.29 
   2   1  -2   65.87    1.28 
   2   1  -2   65.69    1.28 
   2   1  -2   65.10    1.28 
   2   1  -2   66.39    1.28 
   2   1  -2   66.86    1.31 
  -2  -1   2   65.44    1.27 
  -2  -1   2   66.54    1.31 
  -2  -1   2   66.66    1.28 
  -2  -1   2   65.04    1.28 
  -2  -1   2   62.91    1.28 
  -2  -1   2   64.26    1.28 
   1   1  -2  100.00    0.95 
   1   1  -2   99.91    0.95 
   1   1  -2   98.20    0.95 
   1   1  -2   99.63    0.96 
   1   1  -2   97.96    0.95 
   1   1  -2   99.82    0.97 
  -1  -1   2   97.80    0.95 
  -1  -1   2  100.54    0.97 
  -1  -1   2   99.67    0.95 
  -1  -1   2   98.35    0.95 
  -1  -1   2   99.33    0.95 
  -1  -1   2   98.32    0.96 
   0   1  -2   44.68    0.53 
   0   1  -2   46.36    0.53 
   0   1  -2   46.28    0.52 
   0   1  -2   47.91    0.53 
   0   1  -2   46.15    0.54 
   0  -1   2   45.99    0.54 
   0  -1   2   47.10    0.53 
  -1   1  -2   90.13    1.55 
  -1   1  -2   90.56    1.55 
   1  -1   2   90.18    1.54 
   1  -1   2   91.01    1.55 
   1  -1   2   92.62    1.54 
   1  -1   2   89.84    1.56 
  -2   1  -2   78.49    0.85 
  -2   1  -2   76.11    0.84 
   2  -1   2   75.33    0.83 
   2  -1   2   76.70    0.85 
   2  -1   2   76.82    0.86 
   2  -1   2   75.92    0.83 
  -3   1  -2   23.60    0.32 
  -3   1  -2   22.91    0.31 
   3  -1   2   23.45    0.36 
   3  -1   2   23.40    0.29 
   3  -1   2   23.66    0.30 
   3  -1   2   23.58    0.29 
   3  -1   2   23.34    0.29 
  -4   1  -2   11.82    0.27 
  -4   1  -2   11.68    0.30 
   4  -1   2   12.61    0.27 
   4  -1   2   12.63    0.36 
   4  -1   2   12.30    0.27 
   4  -1   2   11.94    0.26 
   4  -1   2   12.29    0.26 
  -5   1  -2   11.37    0.19 
  -5   1  -2   11.88    0.17 
   5  -1   2   11.97    0.17 
   5  -1   2   11.27    0.13 
   5  -1   2   12.09    0.17 
   5  -1   2   11.93    0.25 
   5  -1   2   11.03    0.13 
  -6   1  -2    0.50    0.19 
  -6   1  -2    0.62    0.15 
   6  -1   2    0.17    0.10 
   6  -1   2    1.13    0.27 
   6  -1   2    0.75    0.15 
  -7   1  -2    1.03    0.17 
  -7   1  -2    0.53    0.23 
   7  -1   2    0.29    0.28 
   8   0  -2    2.50    0.28 
   8   0  -2    1.46    0.37 
  -8   0   2    3.18    0.20 
  -8   0   2    2.77    0.24 
   7   0  -2    1.78    0.23 
   7   0  -2    1.60    0.17 
   7   0  -2    1.16    0.32 
  -7   0   2    1.68    0.21 
  -7   0   2    1.59    0.17 
   6   0  -2    2.53    0.13 
   6   0  -2    2.06    0.16 
   6   0  -2    2.37    0.14 
   6   0  -2    2.23    0.27 
  -6   0   2    2.41    0.14 
  -6   0   2    2.37    0.12 
  -6   0   2    2.40    0.09 
  -6   0   2    2.29    0.09 
   5   0  -2   27.32    0.33 
   5   0  -2   27.90    0.45 
   5   0  -2   28.52    0.33 
   5   0  -2   27.45    0.34 
  -5   0   2   28.46    0.31 
  -5   0   2   28.11    0.35 
  -5   0   2   28.44    0.31 
  -5   0   2   28.99    0.31 
  -5   0   2   27.69    0.33 
   4   0  -2   19.14    0.23 
   4   0  -2   20.36    0.25 
   4   0  -2   20.03    0.37 
   4   0  -2   19.08    0.24 
  -4   0   2   19.03    0.23 
  -4   0   2   19.17    0.23 
  -4   0   2   20.83    0.24 
  -4   0   2   20.07    0.24 
  -4   0   2   19.67    0.32 
   3   0  -2    0.71    0.09 
   3   0  -2    1.12    0.09 
   3   0  -2    1.02    0.09 
   3   0  -2    0.93    0.12 
   3   0  -2    1.31    0.10 
   3   0  -2    1.13    0.16 
  -3   0   2    0.82    0.08 
  -3   0   2    1.20    0.09 
  -3   0   2    1.37    0.09 
  -3   0   2    0.91    0.09 
  -3   0   2    0.84    0.08 
  -3   0   2    0.84    0.13 
   2   0  -2   12.12    0.15 
   2   0  -2   11.54    0.14 
   2   0  -2   11.53    0.14 
   2   0  -2   11.84    0.23 
   2   0  -2   11.34    0.15 
   2   0  -2   11.51    0.14 
  -2   0   2   12.27    0.14 
  -2   0   2   11.50    0.14 
  -2   0   2   11.24    0.13 
  -2   0   2   11.40    0.14 
  -2   0   2   11.33    0.17 
   1   0  -2   11.84    0.44 
  -1   0   2   11.40    0.44 
  -1   0   2    9.62    0.42 
  -1   0   2   10.68    0.41 
  -1   0   2   11.08    0.41 
  -1   0   2    9.88    0.41 
  -1   0  -2    3.57    0.17 
  -1   0  -2    3.13    0.20 
  -1   0  -2    3.14    0.15 
  -1   0  -2    3.51    0.16 
   1   0   2    3.30    0.16 
   1   0   2    3.12    0.20 
   1   0   2    3.26    0.16 
   1   0   2    3.41    0.16 
   1   0   2    3.18    0.16 
   1   0   2    3.00    0.15 
  -2   0  -2   28.55    0.36 
  -2   0  -2   30.57    0.35 
  -2   0  -2   29.94    0.35 
   2   0   2   28.55    0.37 
   2   0   2   30.22    0.35 
   2   0   2   29.16    0.35 
  -3   0  -2    7.88    0.06 
  -3   0  -2    7.91    0.10 
  -3   0  -2    7.88    0.07 
  -3   0  -2    7.80    0.10 
  -3   0  -2    7.60    0.08 
   3   0   2    8.01    0.08 
   3   0   2    7.54    0.06 
   3   0   2    7.81    0.06 
   3   0   2    7.60    0.06 
   3   0   2    7.57    0.11 
  -4   0  -2    9.59    0.20 
  -4   0  -2    9.64    0.27 
  -4   0  -2   10.18    0.20 
  -4   0  -2    9.96    0.23 
  -4   0  -2    9.40    0.23 
   4   0   2   10.07    0.30 
   4   0   2    9.46    0.21 
   4   0   2   10.69    0.20 
   4   0   2    9.29    0.20 
   4   0   2    9.44    0.20 
  -5   0  -2    5.38    0.20 
  -5   0  -2    6.68    0.19 
  -5   0  -2    5.80    0.15 
  -5   0  -2    6.48    0.16 
   5   0   2    6.33    0.17 
   5   0   2    6.44    0.16 
   5   0   2    6.45    0.15 
   5   0   2    6.56    0.24 
   5   0   2    6.06    0.16 
  -6   0  -2   22.12    0.29 
  -6   0  -2   20.31    0.32 
   6   0   2   20.99    0.30 
   6   0   2   21.41    0.45 
   6   0   2   21.08    0.32 
   6   0   2   20.39    0.31 
  -7   0  -2    1.71    0.17 
  -7   0  -2    1.55    0.24 
   7   0   2    1.38    0.32 
   7   0   2    1.23    0.16 
   7   0   2    1.17    0.30 
  -8   0  -2    1.20    0.17 
  -8   0  -2    0.94    0.27 
   8   0   2    2.15    0.37 
   8   0   2    0.75    0.38 
  -8   1   2    1.93    0.20 
   7  -1  -2    8.29    0.24 
   7  -1  -2    8.36    0.20 
   7  -1  -2    7.82    0.35 
  -7   1   2    8.18    0.20 
  -7   1   2    8.42    0.22 
   6  -1  -2   -0.23    0.26 
   6  -1  -2    0.04    0.12 
   6  -1  -2    0.17    0.19 
  -6   1   2    0.35    0.16 
  -6   1   2    0.33    0.14 
   5  -1  -2    2.19    0.10 
   5  -1  -2    2.22    0.11 
   5  -1  -2    2.38    0.09 
   5  -1  -2    2.50    0.22 
   5  -1  -2    2.24    0.11 
  -5   1   2    2.28    0.11 
  -5   1   2    2.54    0.11 
  -5   1   2    2.46    0.13 
  -5   1   2    2.28    0.05 
  -5   1   2    2.53    0.05 
   4  -1  -2   39.93    0.58 
   4  -1  -2   40.02    0.58 
   4  -1  -2   40.45    0.67 
   4  -1  -2   40.77    0.58 
   4  -1  -2   40.73    0.58 
  -4   1   2   41.05    0.57 
  -4   1   2   40.25    0.58 
  -4   1   2   40.90    0.57 
  -4   1   2   40.23    0.58 
  -4   1   2   38.38    0.63 
  -4   1   2   39.73    0.58 
   3  -1  -2  105.13    1.02 
   3  -1  -2  103.42    1.07 
   3  -1  -2  103.06    1.02 
   3  -1  -2  106.52    1.02 
   3  -1  -2  102.48    1.02 
  -3   1   2  102.14    1.01 
  -3   1   2  103.05    1.02 
  -3   1   2  101.67    1.01 
  -3   1   2  104.89    1.02 
  -3   1   2  106.79    1.02 
  -3   1   2  102.55    1.06 
   2  -1  -2  146.33    1.28 
   2  -1  -2  145.45    1.24 
   2  -1  -2  145.91    1.24 
   2  -1  -2  147.84    1.24 
   2  -1  -2  145.12    1.25 
  -2   1   2  146.51    1.24 
  -2   1   2  146.08    1.27 
  -2   1   2  147.40    1.24 
  -2   1   2  145.69    1.24 
  -2   1   2  145.12    1.24 
  -2   1   2  146.87    1.24 
   1  -1  -2    1.52    0.10 
   1  -1  -2    1.12    0.12 
   1  -1  -2    1.41    0.10 
   1  -1  -2    1.33    0.10 
   1  -1  -2    1.40    0.09 
   1  -1  -2    1.20    0.09 
  -1   1   2    1.59    0.12 
  -1   1   2    1.49    0.09 
  -1   1   2    1.02    0.10 
  -1   1   2    1.27    0.09 
  -1   1   2    1.57    0.09 
   0   1   2   28.36    0.15 
   0   1   2   28.54    0.15 
   0   1   2   28.28    0.17 
  -1  -1  -2  142.21    1.83 
  -1  -1  -2  141.89    1.84 
  -1  -1  -2  141.72    1.85 
  -1  -1  -2  143.08    1.83 
   1   1   2  142.32    1.84 
   1   1   2  140.84    1.83 
   1   1   2  141.85    1.85 
   1   1   2  139.64    1.83 
  -2  -1  -2  138.09    1.49 
  -2  -1  -2  140.33    1.48 
  -2  -1  -2  141.93    1.49 
  -2  -1  -2  135.04    1.48 
  -2  -1  -2  137.66    1.48 
  -2  -1  -2  137.46    1.48 
   2   1   2  137.98    1.48 
   2   1   2  132.98    1.48 
   2   1   2  138.47    1.49 
   2   1   2  133.52    1.50 
   2   1   2  137.67    1.48 
   2   1   2  132.41    1.48 
  -3  -1  -2    1.55    0.05 
  -3  -1  -2    1.44    0.08 
  -3  -1  -2    1.63    0.07 
  -3  -1  -2    1.67    0.07 
  -3  -1  -2    1.75    0.10 
  -3  -1  -2    1.46    0.05 
   3   1   2    1.58    0.06 
   3   1   2    1.65    0.06 
   3   1   2    1.72    0.07 
   3   1   2    2.02    0.11 
   3   1   2    1.49    0.06 
  -4  -1  -2    2.41    0.10 
  -4  -1  -2    2.19    0.12 
  -4  -1  -2    2.09    0.09 
  -4  -1  -2    2.32    0.07 
  -4  -1  -2    2.37    0.07 
  -4  -1  -2    2.41    0.12 
  -4  -1  -2    2.38    0.09 
   4   1   2    2.28    0.09 
   4   1   2    2.34    0.09 
   4   1   2    3.11    0.16 
   4   1   2    2.42    0.11 
   4   1   2    2.16    0.09 
  -5  -1  -2    1.34    0.15 
  -5  -1  -2    1.00    0.07 
  -5  -1  -2    1.65    0.11 
  -5  -1  -2    1.50    0.12 
  -5  -1  -2    0.93    0.07 
  -5  -1  -2    0.68    0.15 
   5   1   2    1.50    0.16 
   5   1   2    1.53    0.12 
   5   1   2    1.57    0.20 
   5   1   2    1.10    0.10 
   5   1   2    0.86    0.11 
  -6  -1  -2    6.85    0.17 
  -6  -1  -2    5.77    0.18 
  -6  -1  -2    6.18    0.20 
   6   1   2    6.26    0.17 
   6   1   2    6.15    0.22 
   6   1   2    6.82    0.21 
   6   1   2    6.53    0.28 
  -7  -1  -2    8.68    0.22 
  -7  -1  -2    7.79    0.29 
   7   1   2    7.97    0.37 
   7   1   2    7.62    0.35 
   7   1   2    7.63    0.23 
  -8  -1  -2    3.44    0.17 
  -8  -1  -2    3.92    0.24 
   8   1   2    2.19    0.36 
   8   1   2    4.32    0.41 
   7  -2  -2    8.38    0.27 
   7  -2  -2    7.84    0.38 
  -7   2   2    8.48    0.23 
  -7   2   2    8.55    0.26 
   6  -2  -2    7.77    0.18 
   6  -2  -2    8.22    0.35 
   6  -2  -2    8.48    0.21 
  -6   2   2    8.63    0.20 
  -6   2   2    8.17    0.22 
   5  -2  -2   39.36    0.27 
   5  -2  -2   41.13    0.45 
   5  -2  -2   40.35    0.26 
   5  -2  -2   40.51    0.26 
  -5   2   2   41.71    0.27 
  -5   2   2   40.60    0.30 
  -5   2   2   38.89    0.26 
   4  -2  -2    4.74    0.14 
   4  -2  -2    4.90    0.24 
   4  -2  -2    4.95    0.16 
   4  -2  -2    4.40    0.15 
  -4   2   2    5.37    0.17 
  -4   2   2    3.97    0.14 
  -4   2   2    5.20    0.17 
   3  -2  -2    6.58    0.33 
   3  -2  -2    6.99    0.21 
   3  -2  -2    7.10    0.22 
   3  -2  -2    7.09    0.22 
  -3   2   2    6.47    0.29 
  -3   2   2    6.80    0.19 
  -3   2   2    6.13    0.22 
  -3   2   2    6.30    0.21 
  -3   2   2    6.51    0.22 
  -3   2   2    7.25    0.20 
  -3   2   2    6.69    0.21 
   2  -2  -2   99.02    0.87 
   2  -2  -2   97.30    0.82 
   2  -2  -2   98.56    0.83 
   2  -2  -2   99.26    0.83 
   2  -2  -2   99.56    0.82 
  -2   2   2   98.42    0.82 
  -2   2   2   98.98    0.82 
  -2   2   2   98.17    0.83 
  -2   2   2   97.59    0.82 
  -2   2   2   98.87    0.82 
  -2   2   2   98.80    0.86 
  -2   2   2   96.07    0.83 
   1  -2  -2   29.52    0.57 
   1  -2  -2   30.64    0.60 
   1  -2  -2   31.75    0.57 
   1  -2  -2   30.38    0.57 
   1  -2  -2   31.88    0.57 
  -1   2   2   32.34    0.57 
  -1   2   2   31.71    0.57 
  -1   2   2   29.95    0.56 
  -1   2   2   31.75    0.60 
   0  -2  -2  121.94    1.68 
   0  -2  -2  123.33    1.67 
   0  -2  -2  124.75    1.67 
   0  -2  -2  122.17    1.67 
   0  -2  -2  119.35    1.67 
   0  -2  -2  121.60    1.67 
   0   2   2  124.08    1.67 
   0   2   2  124.49    1.67 
   0   2   2  121.77    1.68 
   0   2   2  120.67    1.67 
  -1  -2  -2   13.40    0.11 
  -1  -2  -2   12.66    0.11 
  -1  -2  -2   12.51    0.11 
  -1  -2  -2   12.84    0.11 
  -1  -2  -2   12.74    0.10 
   1   2   2   12.76    0.16 
   1   2   2   13.09    0.10 
   1   2   2   12.62    0.10 
   1   2   2   12.78    0.11 
   1   2   2   12.80    0.10 
  -2  -2  -2   22.21    0.20 
  -2  -2  -2   23.59    0.20 
  -2  -2  -2   22.77    0.23 
   2   2   2   21.81    0.20 
   2   2   2   23.51    0.23 
   2   2   2   23.24    0.20 
  -3  -2  -2    1.97    0.12 
  -3  -2  -2    1.65    0.14 
  -3  -2  -2    1.63    0.11 
  -3  -2  -2    1.65    0.12 
  -3  -2  -2    1.52    0.11 
  -3  -2  -2    2.02    0.12 
   3   2   2    1.69    0.12 
   3   2   2    1.41    0.15 
   3   2   2    1.53    0.11 
   3   2   2    1.77    0.12 
   3   2   2    1.58    0.11 
  -4  -2  -2    0.85    0.11 
  -4  -2  -2    0.94    0.13 
  -4  -2  -2    0.58    0.08 
  -4  -2  -2    1.36    0.11 
  -4  -2  -2    0.85    0.09 
  -4  -2  -2    1.01    0.10 
  -4  -2  -2    0.72    0.08 
   4   2   2    1.47    0.12 
   4   2   2    1.63    0.16 
   4   2   2    0.69    0.10 
   4   2   2    1.13    0.10 
   4   2   2    0.81    0.09 
   4   2   2    1.08    0.16 
  -5  -2  -2   10.72    0.18 
  -5  -2  -2   11.46    0.13 
  -5  -2  -2   10.96    0.16 
  -5  -2  -2   11.29    0.16 
  -5  -2  -2   11.53    0.13 
  -5  -2  -2   11.00    0.12 
   5   2   2   11.12    0.21 
   5   2   2   11.16    0.15 
   5   2   2   11.15    0.16 
   5   2   2   10.62    0.14 
   5   2   2   10.66    0.16 
   5   2   2   10.63    0.20 
  -6  -2  -2    4.81    0.17 
  -6  -2  -2    4.52    0.09 
  -6  -2  -2    4.43    0.12 
  -6  -2  -2    4.33    0.17 
  -6  -2  -2    4.68    0.10 
   6   2   2    4.73    0.14 
   6   2   2    4.64    0.24 
   6   2   2    4.66    0.19 
   6   2   2    4.64    0.26 
   6   2   2    4.29    0.17 
  -7  -2  -2    0.64    0.14 
  -7  -2  -2    0.50    0.19 
   7   2   2    0.25    0.15 
   7   2   2    0.30    0.20 
   7   2   2    0.61    0.29 
   7   2   2    0.04    0.29 
  -8  -2  -2    6.19    0.26 
   8   2   2    6.82    0.38 
   8   2   2    3.88    0.36 
   8   2   2    5.73    0.23 
   7  -3  -2    4.72    0.37 
  -7   3   2    5.47    0.30 
  -7   3   2    5.24    0.21 
   6  -3  -2   17.57    0.41 
   6  -3  -2   16.66    0.21 
   6  -3  -2   17.20    0.25 
  -6   3   2   17.31    0.25 
  -6   3   2   17.49    0.33 
   5  -3  -2    5.53    0.16 
   5  -3  -2    5.07    0.12 
   5  -3  -2    5.54    0.15 
   5  -3  -2    5.58    0.14 
   5  -3  -2    6.04    0.30 
  -5   3   2    6.18    0.18 
  -5   3   2    6.06    0.20 
   4  -3  -2    1.00    0.10 
   4  -3  -2    1.15    0.19 
   4  -3  -2    0.84    0.07 
   4  -3  -2    0.82    0.09 
   4  -3  -2    1.24    0.11 
  -4   3   2    1.01    0.13 
  -4   3   2    0.80    0.08 
  -4   3   2    1.12    0.12 
   3  -3  -2    8.12    0.16 
   3  -3  -2    7.84    0.06 
   3  -3  -2    8.12    0.08 
   3  -3  -2    8.19    0.09 
   3  -3  -2    7.94    0.07 
  -3   3   2    7.91    0.07 
  -3   3   2    7.90    0.09 
  -3   3   2    8.00    0.06 
  -3   3   2    8.00    0.10 
   2  -3  -2    7.50    0.15 
   2  -3  -2    7.22    0.15 
   2  -3  -2    7.38    0.14 
   2  -3  -2    7.22    0.14 
   2  -3  -2    7.29    0.20 
  -2   3   2    7.46    0.14 
  -2   3   2    7.54    0.14 
  -2   3   2    6.93    0.14 
  -2   3   2    7.22    0.12 
   1  -3  -2   39.78    0.21 
   1  -3  -2   40.93    0.21 
   1  -3  -2   39.84    0.27 
   1  -3  -2   39.52    0.22 
   1  -3  -2   39.79    0.21 
   1  -3  -2   40.52    0.21 
  -1   3   2   39.70    0.21 
  -1   3   2   40.86    0.20 
  -1   3   2   40.74    0.21 
  -1   3   2   39.87    0.21 
  -1   3   2   39.95    0.21 
   0  -3  -2    1.05    0.07 
   0  -3  -2    1.25    0.09 
   0  -3  -2    0.82    0.07 
   0  -3  -2    0.61    0.07 
   0  -3  -2    0.59    0.06 
   0  -3  -2    0.85    0.07 
   0   3   2    1.07    0.09 
   0   3   2    0.87    0.07 
   0   3   2    0.97    0.06 
   0   3   2    0.85    0.07 
   0   3   2    0.67    0.06 
  -1  -3  -2  287.36    2.95 
  -1  -3  -2  287.69    2.96 
  -1  -3  -2  287.35    2.96 
  -1  -3  -2  292.87    2.96 
  -1  -3  -2  288.09    2.96 
   1   3   2  287.19    2.96 
   1   3   2  287.23    2.96 
   1   3   2  287.63    2.96 
   1   3   2  290.55    2.97 
   1   3   2  286.99    2.95 
  -2  -3  -2   11.62    0.22 
   2   3   2   11.23    0.26 
   2   3   2   10.84    0.22 
   2   3   2   10.51    0.22 
  -3  -3  -2   22.35    0.18 
  -3  -3  -2   21.67    0.18 
  -3  -3  -2   21.94    0.24 
  -3  -3  -2   22.01    0.18 
  -3  -3  -2   21.19    0.18 
   3   3   2   21.47    0.18 
   3   3   2   21.05    0.21 
   3   3   2   22.00    0.19 
   3   3   2   22.45    0.19 
   3   3   2   21.17    0.18 
  -4  -3  -2    9.95    0.19 
  -4  -3  -2   10.07    0.26 
  -4  -3  -2   10.31    0.19 
  -4  -3  -2    9.64    0.18 
  -4  -3  -2   10.12    0.19 
   4   3   2   10.15    0.19 
   4   3   2   10.12    0.19 
   4   3   2    9.72    0.19 
   4   3   2    9.47    0.22 
   4   3   2   11.20    0.27 
   4   3   2   10.19    0.19 
  -5  -3  -2   18.37    0.29 
  -5  -3  -2   16.89    0.35 
  -5  -3  -2   19.14    0.31 
  -5  -3  -2   17.47    0.28 
  -5  -3  -2   18.15    0.29 
  -5  -3  -2   16.90    0.26 
   5   3   2   17.20    0.32 
   5   3   2   17.50    0.39 
   5   3   2   16.84    0.41 
   5   3   2   17.36    0.30 
   5   3   2   17.75    0.29 
  -6  -3  -2   15.56    0.17 
  -6  -3  -2   16.42    0.21 
  -6  -3  -2   16.42    0.20 
  -6  -3  -2   15.61    0.23 
  -6  -3  -2   16.10    0.19 
   6   3   2   16.56    0.23 
   6   3   2   15.44    0.32 
   6   3   2   15.69    0.30 
   6   3   2   15.79    0.25 
   6   3   2   15.57    0.23 
  -7  -3  -2    0.15    0.18 
  -7  -3  -2    0.48    0.13 
   7   3   2   -0.33    0.28 
   7   3   2    0.46    0.27 
   7   3   2    0.51    0.16 
  -8  -3  -2    3.36    0.23 
   8   3   2    3.34    0.36 
   8   3   2    2.58    0.23 
   8   3   2    2.74    0.28 
   7  -4  -2    0.30    0.38 
  -7   4   2    0.29    0.21 
   6  -4  -2   11.27    0.40 
   6  -4  -2   10.64    0.23 
  -6   4   2   11.15    0.25 
  -6   4   2   11.10    0.28 
   5  -4  -2   37.89    0.43 
   5  -4  -2   39.26    0.64 
   5  -4  -2   37.13    0.42 
   5  -4  -2   35.85    0.44 
   5  -4  -2   37.57    0.43 
  -5   4   2   38.74    0.44 
  -5   4   2   37.08    0.47 
   4  -4  -2    9.60    0.18 
   4  -4  -2    9.67    0.18 
   4  -4  -2    9.76    0.31 
   4  -4  -2    9.49    0.20 
   4  -4  -2    9.30    0.17 
  -4   4   2    9.04    0.17 
  -4   4   2    9.80    0.21 
  -4   4   2   10.05    0.23 
   3  -4  -2    4.16    0.17 
   3  -4  -2    4.01    0.15 
   3  -4  -2    4.27    0.17 
   3  -4  -2    4.61    0.25 
   3  -4  -2    4.18    0.15 
  -3   4   2    4.63    0.19 
  -3   4   2    4.06    0.15 
  -3   4   2    4.56    0.18 
   2  -4  -2   16.81    0.13 
   2  -4  -2   16.41    0.19 
   2  -4  -2   16.46    0.12 
   2  -4  -2   16.13    0.14 
   2  -4  -2   16.75    0.13 
   2  -4  -2   16.37    0.12 
  -2   4   2   16.33    0.14 
  -2   4   2   16.22    0.11 
   1  -4  -2   59.36    0.59 
   1  -4  -2   59.74    0.59 
   1  -4  -2   58.57    0.59 
   1  -4  -2   59.11    0.60 
   1  -4  -2   60.09    0.59 
  -1   4   2   58.65    0.58 
  -1   4   2   58.80    0.58 
  -1   4   2   59.53    0.58 
  -1   4   2   59.93    0.58 
  -1   4   2   58.73    0.59 
   0  -4  -2   51.53    0.53 
   0  -4  -2   52.06    0.52 
   0  -4  -2   51.79    0.54 
   0  -4  -2   52.04    0.52 
   0  -4  -2   50.80    0.52 
   0  -4  -2   51.59    0.52 
   0   4   2   51.16    0.53 
   0   4   2   52.43    0.52 
   0   4   2   51.97    0.52 
   0   4   2   51.13    0.52 
   0   4   2   51.33    0.52 
   0   4   2   50.33    0.52 
  -1  -4  -2    1.79    0.09 
  -1  -4  -2    2.06    0.08 
  -1  -4  -2    1.59    0.08 
  -1  -4  -2    2.23    0.09 
  -1  -4  -2    1.98    0.08 
  -1  -4  -2    1.81    0.09 
   1   4   2    2.13    0.09 
   1   4   2    2.12    0.08 
   1   4   2    1.69    0.09 
   1   4   2    2.00    0.09 
   1   4   2    1.53    0.08 
   1   4   2    2.20    0.09 
  -2  -4  -2    6.49    0.25 
  -2  -4  -2    6.73    0.27 
  -2  -4  -2    6.44    0.26 
  -2  -4  -2    7.13    0.25 
  -2  -4  -2    7.25    0.25 
   2   4   2    7.62    0.25 
   2   4   2    6.33    0.25 
   2   4   2    7.05    0.26 
   2   4   2    6.56    0.25 
   2   4   2    7.44    0.29 
   3   4   2    1.58    0.15 
  -4  -4  -2    0.79    0.09 
  -4  -4  -2    0.81    0.09 
  -4  -4  -2    0.96    0.13 
  -4  -4  -2    0.61    0.09 
  -4  -4  -2    0.61    0.10 
  -4  -4  -2    0.52    0.07 
   4   4   2    0.93    0.09 
   4   4   2    0.80    0.08 
   4   4   2    0.88    0.10 
   4   4   2    0.82    0.10 
   4   4   2    0.67    0.14 
  -5  -4  -2   11.01    0.25 
  -5  -4  -2   10.87    0.25 
  -5  -4  -2   10.58    0.23 
   5   4   2   11.23    0.26 
   5   4   2   11.07    0.26 
   5   4   2   11.20    0.27 
   5   4   2   10.98    0.34 
   5   4   2   10.83    0.38 
  -6  -4  -2   23.53    0.35 
  -6  -4  -2   23.82    0.33 
  -6  -4  -2   21.92    0.29 
  -6  -4  -2   23.17    0.33 
  -6  -4  -2   22.04    0.30 
   6   4   2   23.10    0.38 
   6   4   2   22.36    0.34 
   6   4   2   22.89    0.35 
   6   4   2   22.67    0.45 
   6   4   2   24.15    0.49 
  -7  -4  -2    6.44    0.18 
  -7  -4  -2    6.37    0.18 
   7   4   2    6.31    0.28 
   7   4   2    6.33    0.26 
   7   4   2    5.39    0.31 
   7   4   2    6.45    0.20 
  -8  -4  -2    1.31    0.22 
   8   4   2    0.75    0.18 
   8   4   2   -0.84    0.38 
   8   4   2    1.17    0.31 
   6  -5  -2    0.40    0.33 
   6  -5  -2    0.05    0.19 
  -6   5   2    0.21    0.20 
   5  -5  -2    0.18    0.28 
   5  -5  -2   -0.18    0.13 
   5  -5  -2   -0.17    0.12 
   5  -5  -2   -0.03    0.10 
  -5   5   2   -0.36    0.17 
   4  -5  -2    1.88    0.13 
   4  -5  -2    1.51    0.12 
   4  -5  -2    1.89    0.27 
   4  -5  -2    2.23    0.14 
  -4   5   2    2.39    0.18 
   3  -5  -2    3.63    0.23 
   3  -5  -2    2.81    0.11 
   3  -5  -2    3.30    0.13 
   3  -5  -2    3.68    0.13 
   3  -5  -2    3.53    0.13 
  -3   5   2    3.23    0.11 
  -3   5   2    3.29    0.15 
   2  -5  -2    2.34    0.21 
   2  -5  -2    2.77    0.14 
   2  -5  -2    2.76    0.18 
   2  -5  -2    2.15    0.13 
   2  -5  -2    2.69    0.15 
   2  -5  -2    2.02    0.12 
  -2   5   2    2.49    0.12 
  -2   5   2    2.27    0.14 
   1  -5  -2   16.46    0.24 
   1  -5  -2   16.42    0.25 
   1  -5  -2   16.81    0.24 
   1  -5  -2   16.95    0.24 
   1  -5  -2   17.25    0.24 
  -1   5   2   17.21    0.23 
  -1   5   2   16.83    0.24 
  -1   5   2   17.04    0.23 
  -1   5   2   16.52    0.24 
  -1   5   2   16.27    0.23 
   0  -5  -2   14.00    0.14 
   0  -5  -2   13.68    0.13 
   0  -5  -2   14.07    0.13 
   0  -5  -2   13.71    0.13 
   0  -5  -2   14.24    0.13 
   0  -5  -2   13.71    0.14 
   0   5   2   14.08    0.14 
   0   5   2   14.16    0.13 
   0   5   2   14.05    0.14 
   0   5   2   13.81    0.13 
   0   5   2   13.94    0.14 
   0   5   2   13.54    0.13 
  -1  -5  -2   56.58    0.46 
  -1  -5  -2   58.30    0.47 
  -1  -5  -2   56.81    0.47 
  -1  -5  -2   56.80    0.48 
  -1  -5  -2   57.26    0.47 
   1   5   2   57.14    0.46 
   1   5   2   57.62    0.47 
   1   5   2   57.57    0.47 
   1   5   2   57.79    0.47 
   1   5   2   56.43    0.46 
   1   5   2   57.37    0.47 
   1   5   2   57.20    0.47 
   1   5   2   57.38    0.49 
  -2  -5  -2    8.75    0.24 
  -2  -5  -2    8.15    0.21 
  -2  -5  -2    8.97    0.24 
  -2  -5  -2    8.90    0.22 
  -2  -5  -2    8.87    0.23 
   2   5   2    8.70    0.24 
   2   5   2    9.31    0.23 
   2   5   2    8.67    0.22 
   2   5   2    8.74    0.22 
   2   5   2    9.54    0.27 
   2   5   2    8.25    0.22 
  -3  -5  -2    2.82    0.11 
  -3  -5  -2    3.00    0.12 
  -3  -5  -2    3.00    0.11 
  -3  -5  -2    3.15    0.16 
  -3  -5  -2    2.84    0.13 
   3   5   2    3.12    0.12 
   3   5   2    2.84    0.14 
   3   5   2    3.55    0.13 
   3   5   2    2.92    0.11 
   3   5   2    3.23    0.12 
  -4  -5  -2    2.06    0.15 
  -4  -5  -2    1.90    0.14 
  -4  -5  -2    1.21    0.17 
  -4  -5  -2    1.29    0.13 
   4   5   2    1.60    0.13 
   4   5   2    2.15    0.15 
   4   5   2    1.47    0.17 
   4   5   2    2.49    0.14 
  -5  -5  -2    0.32    0.17 
  -5  -5  -2    0.75    0.13 
  -5  -5  -2    0.59    0.14 
  -5  -5  -2    1.42    0.15 
  -5  -5  -2    0.86    0.12 
   5   5   2    0.94    0.14 
   5   5   2    1.04    0.15 
   5   5   2    0.88    0.20 
   5   5   2    1.02    0.14 
  -6  -5  -2   10.65    0.28 
  -6  -5  -2   10.83    0.26 
   6   5   2   11.34    0.29 
   6   5   2   11.36    0.40 
   6   5   2   10.98    0.36 
   6   5   2   11.05    0.28 
  -7  -5  -2    6.92    0.22 
  -7  -5  -2    7.21    0.24 
   7   5   2    6.86    0.37 
   7   5   2    7.10    0.23 
   7   5   2    8.02    0.32 
  -8  -5  -2    0.80    0.19 
   8   5   2    1.27    0.31 
   8   5   2    0.92    0.27 
   8   5   2   -0.91    0.37 
   6  -6  -2    0.49    0.35 
   6  -6  -2    0.18    0.18 
  -6   6   2   -0.37    0.21 
   5  -6  -2    1.81    0.15 
   5  -6  -2    2.04    0.32 
   5  -6  -2    1.51    0.12 
  -5   6   2    1.83    0.20 
   4  -6  -2    0.10    0.09 
   4  -6  -2    0.20    0.11 
   4  -6  -2    0.11    0.07 
   4  -6  -2    0.00    0.25 
   4  -6  -2    0.29    0.10 
  -4   6   2    0.16    0.16 
   3  -6  -2    4.99    0.11 
   3  -6  -2    4.66    0.11 
   3  -6  -2    5.11    0.11 
   3  -6  -2    4.88    0.23 
   3  -6  -2    4.44    0.08 
  -3   6   2    5.11    0.16 
   2  -6  -2   11.34    0.15 
   2  -6  -2   12.28    0.27 
   2  -6  -2   12.06    0.17 
   2  -6  -2   11.80    0.17 
   2  -6  -2   11.63    0.16 
  -2   6   2   12.54    0.19 
   1  -6  -2   77.34    0.60 
   1  -6  -2   75.18    0.60 
   1  -6  -2   74.43    0.60 
   1  -6  -2   76.95    0.60 
   1  -6  -2   76.53    0.62 
  -1   6   2   75.23    0.59 
  -1   6   2   77.38    0.60 
  -1   6   2   75.00    0.59 
  -1   6   2   76.25    0.61 
  -1   6   2   76.77    0.60 
   0  -6  -2   14.52    0.10 
   0  -6  -2   14.36    0.12 
   0  -6  -2   14.40    0.11 
   0  -6  -2   14.53    0.11 
   0  -6  -2   14.53    0.10 
   0  -6  -2   14.66    0.10 
   0   6   2   14.63    0.10 
   0   6   2   14.41    0.09 
   0   6   2   14.59    0.11 
   0   6   2   14.27    0.09 
   0   6   2   14.34    0.13 
   0   6   2   14.76    0.11 
  -1  -6  -2   70.22    0.47 
  -1  -6  -2   70.97    0.46 
  -1  -6  -2   69.69    0.47 
  -1  -6  -2   69.75    0.48 
  -1  -6  -2   69.88    0.46 
  -1  -6  -2   69.51    0.46 
   1   6   2   69.35    0.46 
   1   6   2   70.08    0.48 
   1   6   2   70.60    0.46 
   1   6   2   69.83    0.46 
   1   6   2   69.46    0.47 
   1   6   2   70.06    0.45 
   1   6   2   69.27    0.46 
  -2  -6  -2   33.77    0.41 
  -2  -6  -2   34.86    0.41 
  -2  -6  -2   33.62    0.39 
  -2  -6  -2   34.03    0.40 
  -2  -6  -2   33.72    0.39 
   2   6   2   34.38    0.43 
   2   6   2   34.46    0.40 
   2   6   2   33.88    0.40 
   2   6   2   34.38    0.40 
   2   6   2   34.52    0.41 
   2   6   2   33.71    0.40 
  -3  -6  -2    7.73    0.30 
  -3  -6  -2    8.63    0.24 
  -3  -6  -2    7.76    0.22 
  -3  -6  -2    8.23    0.23 
  -3  -6  -2    7.71    0.21 
   3   6   2    8.10    0.22 
   3   6   2    8.01    0.26 
   3   6   2    8.09    0.22 
   3   6   2    8.62    0.23 
   3   6   2    8.45    0.23 
   3   6   2    7.89    0.22 
   3   6   2    8.30    0.29 
  -4  -6  -2   70.09    0.52 
  -4  -6  -2   68.43    0.58 
  -4  -6  -2   69.41    0.52 
  -4  -6  -2   71.73    0.53 
   4   6   2   69.56    0.54 
   4   6   2   69.85    0.58 
   4   6   2   68.68    0.53 
   4   6   2   69.55    0.52 
   4   6   2   69.36    0.52 
  -5  -6  -2    0.07    0.12 
  -5  -6  -2   -0.08    0.10 
  -5  -6  -2    0.01    0.14 
  -5  -6  -2   -0.55    0.16 
   5   6   2    0.11    0.12 
   5   6   2   -0.04    0.18 
   5   6   2    0.09    0.15 
   5   6   2   -0.09    0.13 
  -6  -6  -2    1.37    0.18 
  -6  -6  -2    0.59    0.14 
  -6  -6  -2    0.81    0.16 
   6   6   2    1.17    0.26 
   6   6   2    0.66    0.18 
   6   6   2    0.98    0.16 
  -7  -6  -2    4.73    0.24 
  -7  -6  -2    4.43    0.20 
   7   6   2    4.27    0.29 
   7   6   2    4.12    0.32 
   7   6   2    4.38    0.23 
  -8  -6  -2    4.11    0.26 
   8   6   2    4.31    0.22 
   5  -7  -2    1.92    0.36 
   5  -7  -2    1.69    0.17 
  -5   7   2    1.16    0.22 
   4  -7  -2    1.19    0.12 
   4  -7  -2    1.40    0.30 
   4  -7  -2    1.43    0.12 
  -4   7   2    1.25    0.19 
   3  -7  -2    0.48    0.10 
   3  -7  -2    0.51    0.09 
   3  -7  -2    0.68    0.24 
   3  -7  -2    0.52    0.07 
   3  -7  -2    0.32    0.10 
  -3   7   2    0.41    0.15 
   2  -7  -2    5.60    0.25 
   2  -7  -2    5.43    0.14 
   2  -7  -2    5.56    0.15 
   2  -7  -2    5.74    0.15 
   2  -7  -2    5.58    0.15 
   2  -7  -2    5.74    0.14 
  -2   7   2    6.56    0.19 
   1  -7  -2    3.73    0.11 
   1  -7  -2    3.79    0.14 
   1  -7  -2    3.76    0.11 
   1  -7  -2    4.12    0.12 
   1  -7  -2    4.24    0.12 
  -1   7   2    4.29    0.15 
  -1   7   2    3.92    0.10 
   0  -7  -2   18.72    0.28 
   0  -7  -2   19.44    0.27 
   0  -7  -2   18.17    0.27 
   0  -7  -2   19.13    0.31 
   0  -7  -2   19.18    0.28 
   0   7   2   17.56    0.26 
   0   7   2   17.59    0.25 
   0   7   2   17.44    0.27 
   0   7   2   18.49    0.30 
   0   7   2   18.88    0.27 
  -1  -7  -2    6.00    0.18 
  -1  -7  -2    5.57    0.17 
  -1  -7  -2    5.55    0.19 
  -1  -7  -2    5.36    0.18 
  -1  -7  -2    5.92    0.20 
  -1  -7  -2    5.62    0.21 
   1   7   2    5.75    0.21 
   1   7   2    5.97    0.18 
   1   7   2    5.23    0.18 
   1   7   2    6.22    0.18 
   1   7   2    5.73    0.20 
   1   7   2    5.51    0.17 
  -2  -7  -2   44.06    0.39 
  -2  -7  -2   43.88    0.39 
  -2  -7  -2   44.14    0.39 
  -2  -7  -2   43.40    0.38 
  -2  -7  -2   43.40    0.39 
   2   7   2   44.64    0.40 
   2   7   2   44.23    0.37 
   2   7   2   44.26    0.38 
   2   7   2   43.49    0.41 
   2   7   2   43.81    0.38 
   2   7   2   43.48    0.39 
   2   7   2   43.72    0.39 
   2   7   2   43.67    0.39 
  -3  -7  -2   21.07    0.38 
  -3  -7  -2   21.50    0.37 
   3   7   2   21.29    0.38 
   3   7   2   21.13    0.42 
   3   7   2   21.37    0.38 
   3   7   2   22.54    0.37 
   3   7   2   21.62    0.40 
   3   7   2   20.10    0.37 
  -4  -7  -2   17.99    0.35 
  -4  -7  -2   17.05    0.34 
  -4  -7  -2   16.72    0.34 
   4   7   2   18.09    0.36 
   4   7   2   16.28    0.34 
   4   7   2   16.51    0.41 
   4   7   2   17.37    0.34 
   4   7   2   18.05    0.42 
  -5  -7  -2   20.86    0.28 
  -5  -7  -2   20.25    0.30 
   5   7   2   20.07    0.29 
   5   7   2   20.19    0.28 
   5   7   2   19.25    0.32 
   5   7   2   20.85    0.29 
  -6  -7  -2    0.34    0.17 
  -6  -7  -2   -0.05    0.13 
   6   7   2   -0.03    0.22 
   6   7   2    0.30    0.24 
   6   7   2    0.10    0.16 
  -7  -7  -2    2.98    0.16 
  -7  -7  -2    2.90    0.20 
   7   7   2    3.21    0.24 
   7   7   2    3.37    0.31 
  -8  -7  -2    0.12    0.25 
  -8  -7  -2    0.17    0.17 
   8   7   2    0.76    0.30 
   5  -8  -2    1.23    0.15 
   5  -8  -2    1.36    0.35 
  -5   8   2    1.38    0.24 
   4  -8  -2    4.16    0.15 
   4  -8  -2    4.03    0.14 
   4  -8  -2    4.15    0.35 
  -4   8   2    4.31    0.23 
   3  -8  -2    0.81    0.24 
   3  -8  -2    0.54    0.11 
   3  -8  -2    0.56    0.10 
   3  -8  -2    1.17    0.12 
   3  -8  -2    0.62    0.10 
  -3   8   2    0.45    0.17 
   2  -8  -2    0.45    0.10 
   2  -8  -2    0.02    0.23 
   2  -8  -2    0.25    0.08 
   2  -8  -2   -0.02    0.10 
   2  -8  -2    0.17    0.11 
   2  -8  -2    0.36    0.10 
  -2   8   2    0.67    0.16 
   1  -8  -2   21.53    0.29 
   1  -8  -2   20.86    0.28 
   1  -8  -2   21.49    0.29 
   1  -8  -2   21.81    0.29 
   1  -8  -2   21.30    0.36 
  -1   8   2   22.51    0.31 
  -1   8   2   20.96    0.27 
   0  -8  -2   50.39    0.57 
   0  -8  -2   51.25    0.57 
   0  -8  -2   50.25    0.60 
   0  -8  -2   51.62    0.57 
   0   8   2   51.88    0.60 
   0   8   2   51.07    0.56 
   0   8   2   51.65    0.57 
   0   8   2   51.36    0.56 
   0   8   2   50.37    0.56 
  -1  -8  -2   18.96    0.24 
  -1  -8  -2   18.91    0.21 
  -1  -8  -2   18.71    0.22 
  -1  -8  -2   18.76    0.23 
   1   8   2   19.17    0.20 
   1   8   2   18.26    0.21 
   1   8   2   18.76    0.25 
   1   8   2   18.70    0.20 
   1   8   2   18.64    0.22 
   1   8   2   19.14    0.21 
  -2  -8  -2    1.38    0.13 
  -2  -8  -2    1.53    0.09 
  -2  -8  -2    1.64    0.12 
  -2  -8  -2    1.54    0.10 
   2   8   2    1.80    0.12 
   2   8   2    1.18    0.11 
   2   8   2    1.70    0.10 
   2   8   2    1.61    0.14 
   2   8   2    1.36    0.11 
   2   8   2    1.94    0.10 
   2   8   2    1.64    0.12 
   2   8   2    1.62    0.13 
  -3  -8  -2    2.43    0.13 
  -3  -8  -2    2.59    0.10 
  -3  -8  -2    2.48    0.11 
   3   8   2    2.52    0.10 
   3   8   2    2.18    0.13 
   3   8   2    2.56    0.13 
   3   8   2    2.71    0.13 
   3   8   2    2.66    0.12 
  -4  -8  -2    0.53    0.14 
  -4  -8  -2    0.48    0.13 
  -4  -8  -2    1.05    0.18 
   4   8   2    0.78    0.14 
   4   8   2    0.56    0.15 
   4   8   2    0.43    0.14 
   4   8   2    0.83    0.18 
   4   8   2    1.24    0.16 
  -5  -8  -2    9.59    0.22 
  -5  -8  -2    9.91    0.29 
   5   8   2    9.49    0.25 
   5   8   2    8.93    0.27 
   5   8   2    8.13    0.21 
   5   8   2    9.33    0.22 
  -6  -8  -2    1.09    0.13 
  -6  -8  -2    1.30    0.20 
   6   8   2    1.32    0.24 
   6   8   2    1.23    0.18 
   6   8   2    0.93    0.21 
  -7  -8  -2   -0.18    0.22 
  -7  -8  -2   -0.01    0.14 
   7   8   2    0.52    0.31 
   7   8   2    0.04    0.20 
   7   8   2   -0.31    0.24 
  -8  -8  -2    1.43    0.26 
   8   8   2    1.62    0.24 
   8   8   2    2.35    0.31 
   4  -9  -2    3.09    0.15 
   4  -9  -2    3.48    0.38 
  -4   9   2    3.54    0.22 
   3  -9  -2    4.56    0.14 
   3  -9  -2    4.73    0.15 
   3  -9  -2    4.93    0.34 
  -3   9   2    4.99    0.22 
   2  -9  -2    0.05    0.11 
   2  -9  -2    0.08    0.26 
   2  -9  -2   -0.15    0.10 
   2  -9  -2   -0.03    0.10 
  -2   9   2   -0.27    0.17 
   1  -9  -2    3.38    0.15 
   1  -9  -2    4.15    0.13 
   1  -9  -2    3.98    0.13 
   1  -9  -2    3.98    0.12 
  -1   9   2    4.20    0.17 
  -1   9   2    3.57    0.09 
   0  -9  -2   21.94    0.29 
   0  -9  -2   20.56    0.33 
   0  -9  -2   22.43    0.29 
   0  -9  -2   21.52    0.29 
   0   9   2   21.47    0.27 
   0   9   2   22.29    0.27 
   0   9   2   21.99    0.33 
   0   9   2   21.82    0.26 
   0   9   2   22.45    0.29 
  -1  -9  -2   40.13    0.43 
  -1  -9  -2   38.62    0.44 
  -1  -9  -2   38.85    0.43 
  -1  -9  -2   38.89    0.44 
   1   9   2   40.11    0.42 
   1   9   2   38.51    0.42 
   1   9   2   40.83    0.42 
   1   9   2   39.32    0.45 
   1   9   2   39.40    0.42 
  -2  -9  -2    4.28    0.11 
  -2  -9  -2    4.66    0.17 
  -2  -9  -2    4.03    0.12 
  -2  -9  -2    5.11    0.16 
   2   9   2    4.71    0.15 
   2   9   2    4.46    0.14 
   2   9   2    4.53    0.18 
   2   9   2    5.09    0.16 
   2   9   2    5.08    0.14 
   2   9   2    3.87    0.14 
  -3  -9  -2   23.98    0.30 
  -3  -9  -2   24.47    0.29 
  -3  -9  -2   23.23    0.27 
   3   9   2   24.12    0.31 
   3   9   2   22.53    0.28 
   3   9   2   22.94    0.31 
   3   9   2   23.91    0.30 
  -4  -9  -2   -0.04    0.12 
  -4  -9  -2   -0.21    0.17 
  -4  -9  -2   -0.06    0.14 
   4   9   2   -0.38    0.15 
   4   9   2   -0.39    0.16 
   4   9   2    0.16    0.16 
  -5  -9  -2    4.46    0.20 
  -5  -9  -2    4.75    0.22 
   5   9   2    4.07    0.24 
   5   9   2    3.93    0.20 
   5   9   2    4.67    0.21 
   5   9   2    4.11    0.25 
  -6  -9  -2    7.25    0.24 
  -6  -9  -2    6.56    0.18 
   6   9   2    6.36    0.28 
   6   9   2    6.57    0.21 
   6   9   2    6.47    0.28 
  -7  -9  -2    4.69    0.25 
   7   9   2    4.37    0.27 
   7   9   2    4.38    0.22 
   7   9   2    4.83    0.32 
   4 -10  -2    2.17    0.16 
   4 -10  -2    2.02    0.44 
  -4  10   2    2.20    0.27 
   3 -10  -2    9.39    0.21 
   3 -10  -2    8.97    0.41 
  -3  10   2   11.14    0.31 
   2 -10  -2   10.94    0.19 
   2 -10  -2   11.64    0.39 
   2 -10  -2   10.48    0.19 
  -2  10   2   11.20    0.23 
   1 -10  -2    3.71    0.15 
   1 -10  -2    3.23    0.14 
   1 -10  -2    3.17    0.15 
  -1  10   2    3.64    0.18 
   0 -10  -2    0.71    0.13 
   0 -10  -2    1.30    0.13 
   0 -10  -2    1.10    0.12 
   0 -10  -2    1.02    0.13 
   0  10   2    1.15    0.09 
   0  10   2    1.17    0.08 
   0  10   2    1.00    0.19 
   0  10   2    0.96    0.10 
   0  10   2    0.90    0.14 
  -1 -10  -2    5.82    0.18 
  -1 -10  -2    5.61    0.20 
  -1 -10  -2    6.14    0.18 
  -1 -10  -2    5.24    0.15 
   1  10   2    5.98    0.16 
   1  10   2    7.05    0.20 
   1  10   2    6.13    0.24 
   1  10   2    6.48    0.18 
   1  10   2    5.58    0.16 
  -2 -10  -2    5.81    0.15 
  -2 -10  -2    5.44    0.12 
  -2 -10  -2    6.21    0.17 
  -2 -10  -2    5.54    0.19 
   2  10   2    5.01    0.15 
   2  10   2    6.20    0.16 
   2  10   2    5.95    0.20 
   2  10   2    6.25    0.18 
  -3 -10  -2   -0.01    0.13 
  -3 -10  -2   -0.26    0.18 
  -3 -10  -2    0.17    0.14 
   3  10   2   -0.17    0.12 
   3  10   2   -0.09    0.17 
   3  10   2   -0.37    0.11 
   3  10   2   -0.19    0.15 
   3  10   2   -0.39    0.15 
  -4 -10  -2    0.47    0.21 
  -4 -10  -2    0.75    0.16 
   4  10   2    0.53    0.18 
   4  10   2    1.18    0.19 
   4  10   2   -0.06    0.16 
  -5 -10  -2    0.26    0.22 
  -5 -10  -2    0.21    0.17 
   5  10   2    0.30    0.19 
   5  10   2    0.08    0.19 
   5  10   2    0.50    0.19 
  -6 -10  -2    1.53    0.22 
   6  10   2    1.39    0.27 
   6  10   2    1.41    0.22 
   6  10   2    1.73    0.23 
   7  10   2    1.13    0.25 
   7  10   2    1.68    0.31 
   3 -11  -2    1.20    0.14 
   3 -11  -2    1.31    0.36 
  -3  11   2    0.91    0.24 
   2 -11  -2   12.33    0.41 
   2 -11  -2   12.89    0.24 
  -2  11   2   14.68    0.32 
   1 -11  -2    8.71    0.18 
   1 -11  -2    8.77    0.20 
  -1  11   2   10.18    0.24 
   0 -11  -2    0.27    0.15 
   0 -11  -2    0.33    0.14 
   0  11   2    0.05    0.21 
   0  11   2    0.49    0.17 
  -1 -11  -2    0.42    0.17 
  -1 -11  -2    0.55    0.14 
   1  11   2    0.83    0.15 
   1  11   2    0.54    0.13 
   1  11   2    0.18    0.21 
  -2 -11  -2    0.50    0.17 
  -2 -11  -2    0.80    0.16 
   2  11   2    0.99    0.14 
   2  11   2    0.71    0.20 
   2  11   2    0.61    0.15 
  -3 -11  -2    5.57    0.17 
  -3 -11  -2    5.11    0.21 
   3  11   2    4.82    0.14 
   3  11   2    5.10    0.18 
   3  11   2    5.38    0.21 
  -4 -11  -2    2.76    0.25 
  -4 -11  -2    2.65    0.18 
   4  11   2    2.38    0.20 
   4  11   2    1.88    0.18 
   4  11   2    2.98    0.20 
  -5 -11  -2    1.39    0.23 
   5  11   2    1.80    0.22 
  -6 -11  -2   -0.04    0.26 
   6  11   2   -0.20    0.23 
  -7 -11  -2    0.97    0.28 
   7  11   2    1.21    0.24 
   7  11   2    0.62    0.25 
   2 -12  -2    0.34    0.15 
   2 -12  -2   -0.29    0.34 
  -2  12   2   -0.34    0.22 
   1 -12  -2    1.42    0.16 
  -1  12   2    2.30    0.22 
   0 -12  -2    2.67    0.18 
   0 -12  -2    2.66    0.17 
   0  12   2    3.50    0.22 
   0  12   2    2.94    0.25 
  -1 -12  -2    4.45    0.23 
  -1 -12  -2    3.86    0.21 
   1  12   2    4.59    0.28 
   1  12   2    3.69    0.16 
   1  12   2    4.33    0.20 
  -2 -12  -2    3.65    0.21 
  -2 -12  -2    3.47    0.20 
   2  12   2    3.81    0.18 
   2  12   2    3.75    0.18 
   2  12   2    4.40    0.24 
  -3 -12  -2    0.10    0.23 
  -3 -12  -2    0.00    0.21 
   3  12   2    0.09    0.19 
   3  12   2    0.57    0.23 
   3  12   2   -0.20    0.17 
  -4 -12  -2    5.44    0.27 
   4  12   2    5.77    0.25 
   4  12   2    5.06    0.23 
  -5 -12  -2    4.83    0.28 
  -5 -12  -2    4.77    0.23 
   5  12   2    4.55    0.26 
  -6 -12  -2    4.28    0.29 
   6  12   2    4.03    0.25 
  -1  13   2    0.29    0.23 
   0 -13  -2    1.62    0.19 
   0 -13  -2    1.43    0.19 
   0  13   2    1.98    0.21 
  -1 -13  -2    0.65    0.21 
  -1 -13  -2    0.52    0.21 
   1  13   2    0.86    0.28 
   1  13   2    0.98    0.20 
  -2 -13  -2    4.13    0.24 
  -2 -13  -2    5.20    0.27 
   2  13   2    4.53    0.19 
   2  13   2    6.22    0.32 
   2  13   2    5.13    0.23 
  -3 -13  -2   -0.01    0.25 
   3  13   2    0.23    0.27 
   3  13   2    0.23    0.20 
   3  13   2   -0.77    0.18 
  -4 -13  -2    1.42    0.24 
  -4 -13  -2    1.46    0.22 
   4  13   2    1.15    0.21 
   4  13   2    2.02    0.27 
  -5 -13  -2    1.60    0.26 
   5  13   2    1.26    0.26 
   5  13   2    1.46    0.27 
   1  14   2    3.61    0.28 
  -2 -14  -2    0.30    0.25 
   2  14   2   -0.05    0.21 
   2  14   2    0.85    0.28 
  -3 -14  -2    2.84    0.31 
   3  14   2    2.39    0.22 
   3  14   2    3.06    0.27 
   4  14   2    1.05    0.27 
   4  13  -3    0.96    0.25 
   4  13  -3    1.45    0.32 
  -4 -13   3    0.85    0.26 
   3  13  -3    1.13    0.30 
  -3 -13   3    0.96    0.23 
  -3 -13   3    1.11    0.27 
   2  13  -3    0.93    0.30 
  -2 -13   3    0.97    0.25 
  -2 -13   3    1.05    0.25 
   1  13  -3    1.29    0.35 
   1  13  -3    0.24    0.24 
  -1 -13   3   -0.09    0.22 
   5  12  -3    0.08    0.29 
  -5 -12   3    0.19    0.25 
  -5 -12   3    0.32    0.23 
   4  12  -3    1.29    0.29 
  -4 -12   3    1.13    0.23 
  -4 -12   3    0.81    0.29 
   3  12  -3    2.58    0.21 
   3  12  -3    2.33    0.30 
  -3 -12   3    1.87    0.24 
  -3 -12   3    2.05    0.27 
   2  12  -3   12.88    0.34 
  -2 -12   3   11.51    0.25 
  -2 -12   3   11.73    0.25 
   1  12  -3    2.13    0.21 
   1  12  -3    2.47    0.29 
  -1 -12   3    2.38    0.21 
  -1 -12   3    2.21    0.21 
   0  12  -3    0.02    0.22 
   0  12  -3    0.43    0.31 
   0 -12   3   -0.14    0.18 
  -1  12  -3    3.78    0.27 
  -1  12  -3    3.88    0.32 
   1 -12   3    3.27    0.18 
   6  11  -3    1.06    0.29 
   6  11  -3    1.00    0.21 
  -6 -11   3    0.58    0.24 
   5  11  -3    0.22    0.19 
   5  11  -3    0.35    0.28 
  -5 -11   3    0.16    0.29 
  -5 -11   3   -0.03    0.22 
   4  11  -3    2.00    0.26 
  -4 -11   3    2.23    0.20 
  -4 -11   3    1.90    0.23 
   3  11  -3    0.89    0.27 
  -3 -11   3    0.42    0.19 
  -3 -11   3    0.50    0.23 
   2  11  -3   22.59    0.26 
   2  11  -3   23.60    0.35 
  -2 -11   3   24.73    0.39 
  -2 -11   3   23.57    0.32 
  -2 -11   3   23.95    0.32 
   1  11  -3   15.18    0.28 
   1  11  -3   16.13    0.36 
  -1 -11   3   15.64    0.31 
  -1 -11   3   15.12    0.28 
  -1 -11   3   15.28    0.32 
   0  11  -3    5.01    0.23 
   0  11  -3    6.45    0.30 
   0 -11   3    4.69    0.20 
   0 -11   3    4.90    0.20 
  -1  11  -3   -0.06    0.23 
  -1  11  -3    0.26    0.27 
   1 -11   3   -0.09    0.15 
  -2  11  -3    5.06    0.28 
   2 -11   3    4.56    0.14 
   7  10  -3    0.48    0.25 
  -7 -10   3    0.84    0.30 
   6  10  -3   13.97    0.29 
  -6 -10   3   13.45    0.39 
   5  10  -3    1.70    0.26 
   5  10  -3    1.37    0.19 
  -5 -10   3    0.93    0.21 
  -5 -10   3    1.22    0.26 
   4  10  -3    0.44    0.16 
   4  10  -3    0.90    0.25 
  -4 -10   3    0.84    0.21 
  -4 -10   3    0.67    0.23 
   3  10  -3   10.20    0.24 
  -3 -10   3    9.48    0.20 
  -3 -10   3   10.82    0.27 
  -3 -10   3   10.06    0.21 
   2  10  -3    0.47    0.16 
   2  10  -3    1.36    0.24 
  -2 -10   3    1.31    0.23 
  -2 -10   3    0.71    0.19 
  -2 -10   3    0.39    0.16 
   1  10  -3   11.23    0.25 
   1  10  -3   10.64    0.19 
   1  10  -3   10.63    0.13 
   1  10  -3   10.54    0.22 
  -1 -10   3   10.56    0.21 
  -1 -10   3   10.82    0.24 
  -1 -10   3   11.08    0.19 
   0  10  -3    3.17    0.26 
   0  10  -3    3.12    0.22 
   0 -10   3    2.65    0.18 
   0 -10   3    3.36    0.21 
   0 -10   3    2.49    0.25 
  -1  10  -3    0.87    0.25 
  -1  10  -3    0.47    0.20 
   1 -10   3    0.52    0.15 
   1 -10   3   -0.38    0.21 
   1 -10   3    0.73    0.13 
  -2  10  -3    0.47    0.23 
   2 -10   3   -0.06    0.11 
  -3  10  -3    0.45    0.26 
   7   9  -3    0.37    0.25 
  -7  -9   3    0.05    0.23 
   6   9  -3    3.09    0.22 
  -6  -9   3    2.81    0.23 
  -6  -9   3    2.22    0.29 
   5   9  -3   11.07    0.29 
   5   9  -3   11.32    0.27 
  -5  -9   3   11.72    0.28 
  -5  -9   3   12.10    0.31 
   4   9  -3    3.74    0.22 
   4   9  -3    4.16    0.19 
   4   9  -3    4.20    0.25 
  -4  -9   3    3.74    0.23 
  -4  -9   3    4.37    0.22 
   3   9  -3    8.67    0.20 
   3   9  -3    9.29    0.27 
   3   9  -3    9.63    0.21 
  -3  -9   3    9.20    0.22 
  -3  -9   3    9.37    0.23 
  -3  -9   3    9.12    0.22 
  -3  -9   3   10.16    0.31 
   2   9  -3   11.82    0.15 
   2   9  -3   11.32    0.22 
   2   9  -3   11.89    0.15 
  -2  -9   3   11.45    0.17 
  -2  -9   3   12.23    0.23 
  -2  -9   3   12.17    0.18 
  -2  -9   3   11.74    0.14 
   1   9  -3   15.14    0.21 
   1   9  -3   14.66    0.16 
   1   9  -3   15.57    0.26 
   1   9  -3   14.54    0.19 
   1   9  -3   14.40    0.15 
   1   9  -3   14.48    0.16 
  -1  -9   3   15.39    0.26 
  -1  -9   3   15.05    0.20 
  -1  -9   3   15.04    0.19 
  -1  -9   3   14.74    0.20 
   0   9  -3    0.19    0.08 
   0   9  -3    0.77    0.18 
   0   9  -3    0.21    0.21 
   0  -9   3    0.09    0.14 
   0  -9   3    0.38    0.12 
   0  -9   3   -0.23    0.19 
   0  -9   3    0.51    0.12 
  -1   9  -3    6.39    0.25 
  -1   9  -3    6.87    0.21 
   1  -9   3    6.05    0.14 
   1  -9   3    5.85    0.22 
   1  -9   3    5.87    0.19 
   1  -9   3    5.96    0.16 
   1  -9   3    5.94    0.15 
  -2   9  -3    0.70    0.20 
   2  -9   3    0.96    0.11 
   2  -9   3    0.94    0.11 
   2  -9   3    1.16    0.21 
  -3   9  -3   -0.11    0.22 
  -4   9  -3   -0.25    0.24 
   4  -9   3    0.31    0.33 
   7   8  -3    2.41    0.28 
   7   8  -3    2.74    0.24 
   7   8  -3    3.16    0.31 
  -7  -8   3    2.57    0.31 
   6   8  -3    4.42    0.26 
   6   8  -3    4.93    0.22 
   6   8  -3    4.52    0.24 
  -6  -8   3    4.19    0.26 
  -6  -8   3    4.44    0.22 
   5   8  -3    0.24    0.17 
   5   8  -3   -0.12    0.20 
   5   8  -3   -0.05    0.16 
  -5  -8   3    0.23    0.21 
  -5  -8   3   -0.08    0.18 
   4   8  -3    2.47    0.17 
   4   8  -3    2.18    0.13 
   4   8  -3    2.89    0.20 
  -4  -8   3    2.86    0.18 
  -4  -8   3    2.45    0.19 
  -4  -8   3    2.62    0.18 
   3   8  -3   11.71    0.30 
   3   8  -3   11.70    0.27 
   3   8  -3   12.29    0.30 
  -3  -8   3   11.15    0.27 
  -3  -8   3   12.50    0.36 
  -3  -8   3   12.29    0.30 
  -3  -8   3   12.22    0.28 
   2   8  -3   10.41    0.21 
   2   8  -3    9.72    0.25 
   2   8  -3   11.10    0.21 
  -2  -8   3   10.66    0.23 
  -2  -8   3   10.39    0.26 
  -2  -8   3    9.74    0.21 
  -2  -8   3    9.85    0.21 
   1   8  -3    5.57    0.13 
   1   8  -3    5.20    0.16 
   1   8  -3    5.46    0.11 
   1   8  -3    5.41    0.13 
   1   8  -3    5.43    0.10 
   1   8  -3    5.49    0.09 
  -1  -8   3    5.53    0.11 
  -1  -8   3    5.41    0.11 
  -1  -8   3    5.41    0.10 
  -1  -8   3    5.70    0.18 
   0   8  -3   55.32    0.61 
   0   8  -3   52.20    0.58 
   0   8  -3   56.52    0.65 
   0  -8   3   54.99    0.64 
   0  -8   3   53.02    0.59 
   0  -8   3   54.01    0.60 
   0  -8   3   54.55    0.60 
   0  -8   3   55.37    0.60 
  -1   8  -3    2.28    0.18 
  -1   8  -3    2.17    0.20 
   1  -8   3    2.58    0.15 
   1  -8   3    1.45    0.18 
   1  -8   3    2.03    0.09 
   1  -8   3    2.00    0.12 
   1  -8   3    1.69    0.11 
   1  -8   3    2.34    0.11 
  -2   8  -3    0.54    0.23 
  -2   8  -3    1.37    0.20 
   2  -8   3    0.71    0.10 
   2  -8   3    0.91    0.12 
   2  -8   3    0.85    0.20 
  -3   8  -3    0.44    0.21 
  -3   8  -3    0.81    0.21 
   3  -8   3    0.78    0.21 
   3  -8   3    1.04    0.22 
  -4   8  -3    2.72    0.24 
  -4   8  -3    2.72    0.22 
   4  -8   3    3.94    0.30 
   4  -8   3    2.99    0.32 
   8   7  -3    8.10    0.31 
   8   7  -3    6.88    0.27 
  -8  -7   3    7.14    0.30 
   7   7  -3    3.95    0.31 
   7   7  -3    4.18    0.25 
   7   7  -3    4.81    0.31 
  -7  -7   3    4.25    0.29 
   6   7  -3    1.42    0.18 
   6   7  -3    2.07    0.24 
   6   7  -3    1.06    0.22 
  -6  -7   3    1.50    0.18 
  -6  -7   3    0.98    0.23 
   5   7  -3    1.25    0.19 
   5   7  -3    1.13    0.19 
   5   7  -3    1.39    0.16 
   5   7  -3    1.53    0.16 
  -5  -7   3    1.22    0.19 
  -5  -7   3    1.59    0.14 
  -5  -7   3    1.42    0.19 
   4   7  -3    1.07    0.15 
   4   7  -3    0.99    0.13 
   4   7  -3    1.08    0.17 
   4   7  -3    1.33    0.14 
  -4  -7   3    1.20    0.14 
  -4  -7   3    1.13    0.13 
  -4  -7   3    1.22    0.16 
   3   7  -3   15.25    0.23 
   3   7  -3   13.92    0.24 
   3   7  -3   14.79    0.23 
  -3  -7   3   13.99    0.21 
  -3  -7   3   14.39    0.27 
  -3  -7   3   14.67    0.23 
  -3  -7   3   15.49    0.22 
   2   7  -3    1.27    0.12 
   2   7  -3    1.66    0.18 
   2   7  -3    0.95    0.11 
   2   7  -3    0.39    0.15 
  -2  -7   3    1.43    0.18 
  -2  -7   3    1.37    0.14 
  -2  -7   3    1.20    0.13 
  -2  -7   3    1.33    0.12 
   1   7  -3    7.29    0.12 
   1   7  -3    6.97    0.09 
   1   7  -3    7.54    0.13 
   1   7  -3    7.56    0.09 
   1   7  -3    7.50    0.15 
  -1  -7   3    7.65    0.09 
  -1  -7   3    7.26    0.09 
  -1  -7   3    7.52    0.16 
  -1  -7   3    6.98    0.11 
  -1  -7   3    7.66    0.12 
   0   7  -3    6.03    0.12 
   0   7  -3    6.46    0.13 
   0   7  -3    6.28    0.15 
   0   7  -3    6.26    0.08 
   0  -7   3    6.18    0.09 
   0  -7   3    5.79    0.14 
   0  -7   3    6.24    0.07 
   0  -7   3    6.32    0.10 
   0  -7   3    6.10    0.10 
  -1   7  -3   13.94    0.18 
  -1   7  -3   14.19    0.18 
  -1   7  -3   13.46    0.20 
   1  -7   3   13.77    0.14 
   1  -7   3   14.61    0.15 
   1  -7   3   13.51    0.13 
   1  -7   3   13.34    0.19 
   1  -7   3   14.21    0.12 
  -2   7  -3    2.48    0.21 
  -2   7  -3    2.09    0.16 
  -2   7  -3    1.48    0.17 
   2  -7   3    1.54    0.06 
   2  -7   3    1.73    0.09 
   2  -7   3    1.74    0.09 
   2  -7   3    1.78    0.09 
   2  -7   3    2.03    0.19 
  -3   7  -3    2.23    0.22 
  -3   7  -3    1.77    0.22 
   3  -7   3    2.41    0.24 
  -4   7  -3   12.96    0.20 
  -4   7  -3   13.15    0.26 
   4  -7   3   12.81    0.32 
   4  -7   3   13.96    0.30 
  -5   7  -3    5.73    0.22 
  -5   7  -3    6.09    0.28 
   5  -7   3    6.93    0.33 
   5  -7   3    6.29    0.38 
   5  -7   3    5.79    0.31 
   8   6  -3    1.37    0.28 
   8   6  -3   -0.64    0.37 
   8   6  -3    0.38    0.21 
  -8  -6   3    0.37    0.24 
   7   6  -3    6.39    0.25 
   7   6  -3    4.64    0.35 
   7   6  -3    6.28    0.29 
  -7  -6   3    6.14    0.26 
   6   6  -3    3.95    0.25 
   6   6  -3    4.76    0.24 
  -6  -6   3    4.05    0.24 
  -6  -6   3    3.99    0.26 
   5   6  -3    1.33    0.14 
   5   6  -3    0.79    0.14 
   5   6  -3    0.32    0.17 
  -5  -6   3    1.05    0.12 
  -5  -6   3    0.71    0.15 
  -5  -6   3    0.78    0.17 
   4   6  -3    4.95    0.14 
   4   6  -3    4.73    0.14 
   4   6  -3    5.18    0.18 
  -4  -6   3    4.49    0.14 
  -4  -6   3    4.79    0.17 
  -4  -6   3    5.00    0.13 
   3   6  -3    0.26    0.14 
   3   6  -3    0.56    0.13 
   3   6  -3    0.34    0.10 
   3   6  -3    0.36    0.10 
   3   6  -3    1.34    0.12 
  -3  -6   3    1.12    0.11 
  -3  -6   3    0.82    0.13 
  -3  -6   3    0.88    0.17 
  -3  -6   3    0.82    0.12 
   2   6  -3    4.36    0.12 
   2   6  -3    4.97    0.12 
   2   6  -3    4.24    0.15 
   2   6  -3    4.42    0.11 
   2   6  -3    5.14    0.16 
  -2  -6   3    4.63    0.10 
  -2  -6   3    4.46    0.12 
  -2  -6   3    5.25    0.12 
  -2  -6   3    5.13    0.13 
  -2  -6   3    4.98    0.17 
   1   6  -3    1.35    0.11 
   1   6  -3    1.07    0.13 
   1   6  -3    1.94    0.16 
   1   6  -3    1.52    0.10 
   1   6  -3    1.15    0.12 
   1   6  -3    1.10    0.10 
  -1  -6   3    1.55    0.12 
  -1  -6   3    1.66    0.10 
  -1  -6   3    2.02    0.17 
  -1  -6   3    1.77    0.11 
  -1  -6   3    1.56    0.11 
   0   6  -3   12.28    0.16 
   0   6  -3   12.17    0.16 
   0   6  -3   12.07    0.08 
   0   6  -3   12.24    0.14 
   0   6  -3   11.78    0.10 
   0  -6   3   11.77    0.16 
   0  -6   3   11.58    0.11 
   0  -6   3   12.62    0.13 
   0  -6   3   12.10    0.11 
   0  -6   3   12.13    0.12 
   0  -6   3   12.51    0.12 
  -1   6  -3   -0.21    0.13 
  -1   6  -3    0.02    0.11 
  -1   6  -3    0.07    0.12 
   1  -6   3    0.07    0.04 
   1  -6   3   -0.05    0.07 
   1  -6   3    0.06    0.13 
   1  -6   3    0.25    0.07 
   1  -6   3    0.37    0.06 
  -2   6  -3    2.73    0.14 
  -2   6  -3    2.70    0.17 
  -2   6  -3    2.58    0.13 
   2  -6   3    2.78    0.06 
   2  -6   3    2.65    0.06 
   2  -6   3    2.95    0.16 
   2  -6   3    2.89    0.07 
  -3   6  -3    1.04    0.19 
  -3   6  -3    1.39    0.17 
   3  -6   3    1.51    0.20 
  -4   6  -3   25.47    0.39 
  -4   6  -3   25.76    0.43 
   4  -6   3   27.26    0.60 
   4  -6   3   27.55    0.50 
  -5   6  -3   17.91    0.27 
  -5   6  -3   16.48    0.27 
   5  -6   3   17.28    0.38 
   5  -6   3   18.16    0.33 
   8   5  -3   -0.36    0.27 
   8   5  -3   -0.06    0.21 
  -8  -5   3    0.09    0.22 
   7   5  -3    0.42    0.19 
   7   5  -3   -0.31    0.23 
  -7  -5   3   -0.09    0.20 
   6   5  -3    6.25    0.22 
   6   5  -3    6.43    0.21 
   6   5  -3    5.33    0.30 
  -6  -5   3    5.91    0.22 
  -6  -5   3    6.59    0.21 
  -6  -5   3    6.01    0.13 
   5   5  -3    5.46    0.25 
   5   5  -3    4.63    0.30 
   5   5  -3    4.91    0.21 
   5   5  -3    5.15    0.23 
  -5  -5   3    4.83    0.21 
  -5  -5   3    5.29    0.23 
  -5  -5   3    4.73    0.15 
   4   5  -3   22.25    0.36 
   4   5  -3   22.14    0.35 
   4   5  -3   23.14    0.35 
  -4  -5   3   22.11    0.33 
  -4  -5   3   22.26    0.35 
  -4  -5   3   22.44    0.36 
   3   5  -3    3.64    0.12 
   3   5  -3    3.52    0.10 
   3   5  -3    3.38    0.11 
   3   5  -3    3.14    0.11 
   3   5  -3    3.67    0.15 
  -3  -5   3    3.35    0.08 
  -3  -5   3    3.26    0.15 
  -3  -5   3    3.55    0.15 
  -3  -5   3    3.72    0.11 
  -3  -5   3    3.66    0.11 
  -3  -5   3    3.25    0.12 
   2   5  -3   59.75    0.80 
   2   5  -3   58.77    0.83 
   2   5  -3   59.44    0.80 
   2   5  -3   59.52    0.80 
   2   5  -3   58.29    0.79 
  -2  -5   3   59.01    0.82 
  -2  -5   3   57.15    0.84 
  -2  -5   3   59.74    0.80 
  -2  -5   3   59.19    0.80 
  -2  -5   3   58.72    0.80 
  -2  -5   3   57.98    0.79 
   1   5  -3    3.88    0.12 
   1   5  -3    4.37    0.12 
   1   5  -3    3.37    0.13 
   1   5  -3    3.74    0.10 
   1   5  -3    3.41    0.10 
   1   5  -3    3.56    0.14 
   1   5  -3    3.64    0.11 
  -1  -5   3    3.86    0.11 
  -1  -5   3    3.71    0.11 
  -1  -5   3    3.74    0.10 
  -1  -5   3    3.97    0.10 
   0   5  -3   23.42    0.32 
   0   5  -3   24.45    0.36 
   0   5  -3   25.62    0.33 
   0   5  -3   26.41    0.34 
   0   5  -3   24.49    0.37 
   0   5  -3   23.69    0.32 
   0  -5   3   24.23    0.32 
   0  -5   3   24.70    0.35 
   0  -5   3   24.91    0.37 
   0  -5   3   23.83    0.32 
   0  -5   3   23.79    0.33 
   0  -5   3   25.16    0.32 
  -1   5  -3   19.74    0.27 
  -1   5  -3   19.85    0.23 
  -1   5  -3   20.10    0.24 
   1  -5   3   20.24    0.28 
   1  -5   3   19.56    0.20 
   1  -5   3   20.53    0.21 
   1  -5   3   20.05    0.21 
   1  -5   3   19.62    0.24 
   1  -5   3   20.12    0.21 
  -2   5  -3    4.52    0.18 
  -2   5  -3    5.09    0.20 
  -2   5  -3    5.04    0.18 
   2  -5   3    5.28    0.21 
  -3   5  -3   16.77    0.23 
  -3   5  -3   16.90    0.24 
   3  -5   3   17.73    0.29 
  -4   5  -3    6.99    0.15 
  -4   5  -3    7.34    0.20 
   4  -5   3    6.88    0.26 
  -5   5  -3   14.49    0.28 
  -5   5  -3   13.91    0.31 
   5  -5   3   14.53    0.39 
  -6   5  -3    1.52    0.22 
  -6   5  -3    1.11    0.25 
   6  -5   3    1.79    0.35 
   6  -5   3    1.81    0.32 
   8   4  -3    0.33    0.23 
   8   4  -3   -0.33    0.30 
  -8  -4   3    0.35    0.15 
  -8  -4   3    0.29    0.25 
   7   4  -3   -0.30    0.22 
   7   4  -3    0.05    0.17 
  -7  -4   3   -0.04    0.13 
  -7  -4   3   -0.43    0.18 
   6   4  -3    0.37    0.18 
   6   4  -3    0.16    0.26 
   6   4  -3    0.19    0.14 
  -6  -4   3    0.33    0.17 
  -6  -4   3    0.18    0.10 
  -6  -4   3    0.18    0.15 
   5   4  -3    4.20    0.22 
   5   4  -3    4.51    0.15 
   5   4  -3    5.19    0.15 
   5   4  -3    4.51    0.15 
  -5  -4   3    4.76    0.09 
  -5  -4   3    4.48    0.14 
  -5  -4   3    4.77    0.12 
   4   4  -3    5.56    0.20 
   4   4  -3    4.54    0.18 
   4   4  -3    3.96    0.23 
   4   4  -3    5.03    0.18 
  -4  -4   3    4.94    0.18 
  -4  -4   3    4.51    0.13 
  -4  -4   3    4.90    0.18 
  -4  -4   3    4.69    0.16 
   3   4  -3   15.54    0.34 
   3   4  -3   15.28    0.29 
   3   4  -3   15.15    0.29 
   3   4  -3   14.71    0.28 
   3   4  -3   15.33    0.30 
  -3  -4   3   15.67    0.35 
  -3  -4   3   14.81    0.28 
  -3  -4   3   14.57    0.37 
  -3  -4   3   15.79    0.30 
  -3  -4   3   15.52    0.29 
  -3  -4   3   15.61    0.29 
   2   4  -3    4.02    0.16 
   2   4  -3    4.30    0.14 
   2   4  -3    3.62    0.13 
   2   4  -3    4.26    0.13 
   2   4  -3    3.52    0.12 
  -2  -4   3    3.78    0.13 
  -2  -4   3    3.81    0.18 
  -2  -4   3    3.51    0.11 
  -2  -4   3    4.18    0.13 
  -2  -4   3    4.87    0.20 
  -2  -4   3    4.78    0.14 
   1   4  -3   43.64    0.45 
   1   4  -3   44.53    0.43 
   1   4  -3   44.55    0.43 
   1   4  -3   44.77    0.46 
   1   4  -3   43.69    0.43 
  -1  -4   3   45.06    0.46 
  -1  -4   3   43.33    0.43 
  -1  -4   3   44.49    0.43 
  -1  -4   3   43.55    0.43 
  -1  -4   3   44.75    0.43 
   0   4  -3   22.78    0.18 
   0   4  -3   22.69    0.20 
   0   4  -3   23.05    0.17 
   0   4  -3   22.95    0.23 
   0   4  -3   22.68    0.19 
   0   4  -3   22.97    0.17 
   0   4  -3   23.17    0.18 
   0  -4   3   23.30    0.18 
   0  -4   3   23.52    0.19 
   0  -4   3   23.23    0.17 
   0  -4   3   22.88    0.23 
   0  -4   3   22.47    0.21 
   0  -4   3   22.84    0.18 
   0  -4   3   22.94    0.17 
  -1   4  -3   42.22    0.35 
  -1   4  -3   42.22    0.36 
  -1   4  -3   42.02    0.34 
   1  -4   3   41.51    0.32 
   1  -4   3   42.48    0.38 
   1  -4   3   42.95    0.33 
   1  -4   3   42.40    0.32 
   1  -4   3   42.04    0.33 
   1  -4   3   42.61    0.36 
   1  -4   3   41.32    0.35 
  -2   4  -3   17.43    0.28 
  -2   4  -3   16.87    0.25 
  -2   4  -3   17.25    0.24 
   2  -4   3   16.61    0.25 
   2  -4   3   16.76    0.28 
  -3   4  -3   31.36    0.33 
  -3   4  -3   32.80    0.32 
   3  -4   3   31.70    0.43 
  -4   4  -3    2.95    0.18 
  -4   4  -3    2.86    0.15 
   4  -4   3    2.58    0.23 
  -5   4  -3    1.53    0.22 
  -5   4  -3    1.83    0.19 
   5  -4   3    1.66    0.28 
  -6   4  -3    2.49    0.20 
  -6   4  -3    2.91    0.28 
   6  -4   3    3.20    0.33 
   6  -4   3    2.38    0.29 
   8   3  -3    0.78    0.23 
   8   3  -3   -1.08    0.37 
  -8  -3   3    0.80    0.16 
   7   3  -3   -0.08    0.16 
   7   3  -3   -0.27    0.24 
  -7  -3   3   -0.09    0.17 
  -7  -3   3   -0.33    0.14 
   6   3  -3    6.52    0.18 
   6   3  -3    6.00    0.29 
   6   3  -3    6.82    0.20 
  -6  -3   3    6.17    0.16 
  -6  -3   3    6.37    0.14 
  -6  -3   3    6.70    0.17 
   5   3  -3    0.39    0.13 
   5   3  -3    0.14    0.13 
   5   3  -3    0.47    0.21 
   5   3  -3    0.07    0.11 
  -5  -3   3    0.04    0.14 
  -5  -3   3    0.19    0.11 
  -5  -3   3    0.03    0.14 
  -5  -3   3    0.18    0.09 
   4   3  -3    5.47    0.14 
   4   3  -3    5.73    0.14 
   4   3  -3    5.01    0.14 
   4   3  -3    5.19    0.18 
  -4  -3   3    5.78    0.09 
  -4  -3   3    5.49    0.14 
  -4  -3   3    6.28    0.14 
  -4  -3   3    4.91    0.17 
  -4  -3   3    6.05    0.14 
  -4  -3   3    5.39    0.13 
   3   3  -3   20.28    0.47 
   3   3  -3   21.56    0.44 
   3   3  -3   20.86    0.51 
   3   3  -3   21.00    0.44 
   3   3  -3   20.74    0.44 
   3   3  -3   20.14    0.43 
  -3  -3   3   20.65    0.44 
  -3  -3   3   21.14    0.44 
  -3  -3   3   19.71    0.41 
  -3  -3   3   19.91    0.50 
  -3  -3   3   20.33    0.43 
  -3  -3   3   20.85    0.44 
  -3  -3   3   20.65    0.48 
   2   3  -3   65.33    0.66 
   2   3  -3   64.79    0.64 
   2   3  -3   66.26    0.70 
   2   3  -3   65.12    0.64 
   2   3  -3   65.25    0.64 
   2   3  -3   65.73    0.64 
  -2  -3   3   66.20    0.64 
  -2  -3   3   64.84    0.64 
  -2  -3   3   65.92    0.64 
  -2  -3   3   66.13    0.69 
  -2  -3   3   64.47    0.64 
  -2  -3   3   65.00    0.66 
   1   3  -3   46.55    0.67 
   1   3  -3   46.22    0.64 
   1   3  -3   47.28    0.65 
   1   3  -3   45.37    0.64 
   1   3  -3   46.18    0.65 
  -1  -3   3   46.67    0.67 
  -1  -3   3   45.49    0.64 
  -1  -3   3   46.79    0.65 
  -1  -3   3   45.37    0.64 
  -1  -3   3   46.20    0.65 
   0   3  -3    5.08    0.11 
   0   3  -3    4.87    0.11 
   0   3  -3    5.25    0.09 
   0   3  -3    5.15    0.08 
   0   3  -3    5.29    0.08 
   0   3  -3    5.29    0.09 
   0   3  -3    5.22    0.13 
   0  -3   3    5.28    0.08 
   0  -3   3    5.31    0.12 
   0  -3   3    5.27    0.08 
   0  -3   3    5.17    0.08 
   0  -3   3    5.50    0.11 
   0  -3   3    5.03    0.10 
  -1   3  -3    1.38    0.11 
  -1   3  -3    1.21    0.12 
  -1   3  -3    1.31    0.10 
   1  -3   3    1.36    0.07 
   1  -3   3    1.11    0.07 
   1  -3   3    1.25    0.13 
   1  -3   3    1.27    0.07 
   1  -3   3    1.86    0.14 
   1  -3   3    1.50    0.10 
   1  -3   3    1.16    0.06 
  -2   3  -3   13.52    0.19 
  -2   3  -3   13.16    0.18 
  -2   3  -3   12.28    0.19 
   2  -3   3   12.26    0.18 
  -3   3  -3   22.81    0.30 
  -3   3  -3   22.27    0.28 
   3  -3   3   23.38    0.36 
   3  -3   3   23.83    0.30 
  -4   3  -3    3.86    0.14 
  -4   3  -3    3.87    0.16 
   4  -3   3    3.59    0.20 
  -5   3  -3    0.05    0.18 
  -5   3  -3   -0.10    0.15 
   5  -3   3    0.13    0.23 
   5  -3   3   -0.03    0.06 
  -6   3  -3    2.13    0.25 
  -6   3  -3    2.25    0.20 
   6  -3   3    2.37    0.30 
  -7   3  -3    0.72    0.27 
  -7   3  -3    0.69    0.19 
   7  -3   3    0.81    0.33 
   7  -3   3    0.83    0.35 
   8   2  -3    0.04    0.28 
   8   2  -3    0.30    0.20 
  -8  -2   3    0.62    0.17 
  -8  -2   3    0.31    0.15 
   7   2  -3    4.18    0.35 
   7   2  -3    5.56    0.21 
   7   2  -3    5.15    0.26 
  -7  -2   3    4.84    0.16 
  -7  -2   3    5.36    0.19 
  -7  -2   3    5.13    0.18 
   6   2  -3    9.07    0.35 
   6   2  -3   10.07    0.25 
   6   2  -3    9.19    0.25 
  -6  -2   3    9.66    0.23 
  -6  -2   3    9.32    0.20 
  -6  -2   3    9.50    0.22 
  -6  -2   3    9.07    0.25 
   5   2  -3   24.15    0.33 
   5   2  -3   23.75    0.46 
   5   2  -3   23.81    0.34 
   5   2  -3   24.57    0.34 
  -5  -2   3   23.72    0.31 
  -5  -2   3   24.75    0.32 
  -5  -2   3   24.18    0.30 
   4   2  -3    0.57    0.09 
   4   2  -3    0.96    0.16 
   4   2  -3    1.12    0.11 
   4   2  -3    0.76    0.11 
   4   2  -3    0.85    0.10 
   4   2  -3    0.81    0.18 
  -4  -2   3    0.59    0.08 
  -4  -2   3    0.85    0.10 
  -4  -2   3    0.43    0.14 
  -4  -2   3    0.82    0.07 
  -4  -2   3    0.93    0.11 
  -4  -2   3    0.88    0.10 
   3   2  -3   28.18    0.33 
   3   2  -3   28.53    0.37 
   3   2  -3   28.22    0.40 
   3   2  -3   27.96    0.33 
   3   2  -3   28.33    0.33 
   3   2  -3   28.30    0.33 
  -3  -2   3   27.61    0.33 
  -3  -2   3   28.03    0.33 
  -3  -2   3   27.66    0.33 
  -3  -2   3   27.63    0.40 
  -3  -2   3   27.98    0.33 
  -3  -2   3   27.37    0.31 
   2   2  -3   51.62    0.74 
   2   2  -3   52.77    0.75 
   2   2  -3   52.28    0.78 
   2   2  -3   52.33    0.76 
   2   2  -3   52.86    0.75 
   2   2  -3   51.45    0.74 
  -2  -2   3   52.64    0.75 
  -2  -2   3   51.83    0.75 
  -2  -2   3   52.33    0.74 
  -2  -2   3   51.36    0.74 
  -2  -2   3   51.45    0.76 
  -2  -2   3   52.25    0.78 
   1   2  -3  132.59    1.53 
   1   2  -3  134.72    1.55 
   1   2  -3  132.98    1.53 
   1   2  -3  133.64    1.53 
   1   2  -3  135.13    1.54 
  -1  -2   3  131.92    1.53 
  -1  -2   3  134.63    1.56 
  -1  -2   3  132.95    1.53 
  -1  -2   3  134.04    1.53 
  -1  -2   3  133.27    1.53 
  -1  -2   3  133.82    1.55 
   0   2  -3    4.91    0.06 
   0   2  -3    4.61    0.06 
   0   2  -3    4.41    0.08 
   0   2  -3    4.71    0.05 
   0   2  -3    4.58    0.08 
   0   2  -3    4.51    0.10 
   0   2  -3    4.34    0.06 
   0  -2   3    4.65    0.05 
   0  -2   3    5.11    0.07 
   0  -2   3    4.77    0.10 
   0  -2   3    4.26    0.07 
   0  -2   3    4.16    0.06 
  -1   2  -3    5.29    0.22 
  -1   2  -3    6.10    0.23 
  -1   2  -3    4.94    0.21 
   1  -2   3    4.74    0.19 
   1  -2   3    5.52    0.24 
   1  -2   3    5.45    0.22 
   1  -2   3    5.72    0.20 
   1  -2   3    5.26    0.25 
  -2   2  -3    5.01    0.22 
  -2   2  -3    5.40    0.20 
   2  -2   3    5.98    0.25 
  -3   2  -3    3.73    0.17 
   3  -2   3    4.92    0.14 
   3  -2   3    4.78    0.19 
   3  -2   3    4.85    0.14 
  -4   2  -3   17.19    0.21 
  -4   2  -3   16.96    0.24 
   4  -2   3   17.48    0.19 
   4  -2   3   16.92    0.18 
   4  -2   3   16.44    0.27 
   4  -2   3   16.77    0.17 
   4  -2   3   16.79    0.17 
  -5   2  -3    0.22    0.17 
  -5   2  -3    0.49    0.15 
   5  -2   3    0.39    0.11 
   5  -2   3   -0.05    0.09 
   5  -2   3    0.09    0.07 
   5  -2   3    0.21    0.07 
   5  -2   3   -0.13    0.20 
  -6   2  -3    0.74    0.21 
  -6   2  -3    0.49    0.16 
   6  -2   3    0.30    0.27 
   6  -2   3    0.31    0.13 
   6  -2   3    0.54    0.25 
  -7   2  -3    1.73    0.19 
  -7   2  -3    0.94    0.29 
   7  -2   3    0.88    0.32 
   7  -2   3    1.64    0.33 
   8   1  -3   -0.04    0.20 
   8   1  -3   -0.27    0.28 
  -8  -1   3    0.07    0.18 
  -8  -1   3   -0.11    0.20 
   7   1  -3   -0.30    0.16 
   7   1  -3    0.11    0.22 
   7   1  -3   -0.62    0.31 
  -7  -1   3   -0.20    0.16 
  -7  -1   3    0.14    0.15 
  -7  -1   3    0.04    0.14 
   6   1  -3    1.14    0.19 
   6   1  -3    1.44    0.19 
   6   1  -3    1.44    0.15 
   6   1  -3    0.92    0.27 
  -6  -1   3    1.15    0.16 
  -6  -1   3    1.29    0.13 
  -6  -1   3    1.26    0.14 
  -6  -1   3    1.09    0.11 
   5   1  -3   43.00    0.59 
   5   1  -3   42.63    0.47 
   5   1  -3   42.57    0.47 
   5   1  -3   41.99    0.47 
  -5  -1   3   42.32    0.46 
  -5  -1   3   42.03    0.46 
  -5  -1   3   42.56    0.48 
  -5  -1   3   43.51    0.46 
   4   1  -3   10.69    0.21 
   4   1  -3   10.49    0.21 
   4   1  -3   11.71    0.23 
   4   1  -3   12.25    0.28 
   4   1  -3   11.52    0.35 
   4   1  -3   12.00    0.23 
  -4  -1   3   10.67    0.20 
  -4  -1   3   10.80    0.20 
  -4  -1   3   10.89    0.30 
  -4  -1   3   11.96    0.21 
  -4  -1   3   11.28    0.19 
   3   1  -3   10.53    0.17 
   3   1  -3   10.46    0.11 
   3   1  -3   10.60    0.11 
   3   1  -3   10.33    0.11 
   3   1  -3   10.10    0.10 
  -3  -1   3   10.31    0.11 
  -3  -1   3   10.02    0.14 
  -3  -1   3   10.79    0.11 
  -3  -1   3   10.39    0.10 
  -3  -1   3   10.19    0.11 
  -3  -1   3   11.06    0.10 
   2   1  -3   19.99    0.40 
   2   1  -3   21.10    0.46 
  -2  -1   3   20.92    0.44 
  -2  -1   3   20.08    0.39 
  -2  -1   3   21.02    0.40 
  -2  -1   3   20.15    0.42 
   1   1  -3  191.82    2.27 
   1   1  -3  190.82    2.26 
   1   1  -3  190.24    2.26 
   1   1  -3  190.37    2.28 
   1   1  -3  189.94    2.26 
   1   1  -3  192.50    2.26 
   1   1  -3  189.87    2.26 
  -1  -1   3  190.95    2.26 
  -1  -1   3  190.97    2.28 
  -1  -1   3  190.92    2.26 
  -1  -1   3  189.36    2.26 
  -1  -1   3  190.31    2.27 
  -1  -1   3  190.53    2.26 
   0   1  -3   79.65    0.79 
   0   1  -3   79.23    0.81 
   0   1  -3   79.93    0.79 
   0   1  -3   80.37    0.80 
   0   1  -3   79.47    0.79 
   0   1  -3   78.63    0.79 
   0   1  -3   79.80    0.79 
   0  -1   3   79.78    0.79 
   0  -1   3   79.93    0.79 
   0  -1   3   78.86    0.79 
   0  -1   3   79.61    0.80 
   0  -1   3   79.74    0.81 
  -1   1  -3   50.55    0.58 
  -1   1  -3   50.09    0.57 
  -1   1  -3   50.69    0.60 
  -1   1  -3   52.31    0.58 
  -1   1  -3   51.73    0.57 
   1  -1   3   50.43    0.60 
   1  -1   3   50.37    0.57 
   1  -1   3   50.00    0.59 
   1  -1   3   51.11    0.58 
   1  -1   3   50.55    0.57 
   1  -1   3   50.21    0.57 
  -2   1  -3   33.27    0.45 
  -2   1  -3   33.08    0.46 
   2  -1   3   34.05    0.49 
   2  -1   3   34.33    0.45 
   2  -1   3   32.64    0.44 
   2  -1   3   32.86    0.44 
   2  -1   3   33.22    0.44 
  -3   1  -3   32.86    0.44 
  -3   1  -3   33.62    0.46 
   3  -1   3   33.28    0.43 
   3  -1   3   33.83    0.49 
   3  -1   3   33.54    0.43 
   3  -1   3   33.47    0.45 
   3  -1   3   32.93    0.43 
   3  -1   3   32.97    0.43 
  -4   1  -3   34.03    0.30 
  -4   1  -3   34.40    0.27 
   4  -1   3   34.78    0.36 
   4  -1   3   35.25    0.26 
   4  -1   3   35.13    0.30 
   4  -1   3   34.41    0.26 
   4  -1   3   34.55    0.26 
   4  -1   3   34.92    0.27 
  -5   1  -3    0.99    0.15 
  -5   1  -3    1.32    0.13 
   5  -1   3    1.22    0.08 
   5  -1   3    1.44    0.12 
   5  -1   3    1.48    0.19 
   5  -1   3    1.63    0.11 
   5  -1   3    1.10    0.08 
  -6   1  -3   -0.04    0.19 
  -6   1  -3    0.33    0.14 
   6  -1   3    0.01    0.09 
   6  -1   3    0.47    0.27 
   6  -1   3    0.11    0.25 
   6  -1   3   -0.04    0.14 
   6  -1   3   -0.02    0.14 
  -7   1  -3    0.19    0.18 
  -7   1  -3    0.36    0.22 
   7  -1   3    0.04    0.28 
   7  -1   3    0.67    0.31 
   8   0  -3    2.58    0.31 
   8   0  -3    0.84    0.38 
   8   0  -3    1.96    0.22 
  -8   0   3    2.91    0.21 
  -8   0   3    2.22    0.20 
   7   0  -3    2.76    0.32 
   7   0  -3    3.23    0.24 
   7   0  -3    3.47    0.18 
  -7   0   3    3.57    0.21 
  -7   0   3    3.68    0.18 
   6   0  -3    0.15    0.13 
   6   0  -3    0.02    0.26 
   6   0  -3   -0.57    0.16 
  -6   0   3    0.24    0.14 
  -6   0   3    0.25    0.10 
  -6   0   3    0.42    0.11 
  -6   0   3    0.35    0.14 
   5   0  -3   20.14    0.43 
   5   0  -3   19.16    0.28 
   5   0  -3   19.87    0.28 
   5   0  -3   18.97    0.28 
  -5   0   3   19.97    0.26 
  -5   0   3   20.34    0.26 
  -5   0   3   18.69    0.28 
  -5   0   3   19.88    0.26 
   4   0  -3  101.48    0.92 
   4   0  -3  101.74    0.85 
   4   0  -3  104.25    0.88 
   4   0  -3  102.54    0.85 
   4   0  -3  102.88    0.85 
   4   0  -3  102.01    0.85 
  -4   0   3  102.62    0.84 
  -4   0   3  101.40    0.84 
  -4   0   3  101.22    0.90 
  -4   0   3  102.58    0.85 
  -4   0   3  102.27    0.84 
  -4   0   3  102.52    0.85 
   3   0  -3    1.82    0.19 
  -3   0   3    1.75    0.18 
  -3   0   3    2.63    0.15 
  -3   0   3    1.81    0.14 
  -3   0   3    2.65    0.13 
   2   0  -3   14.61    0.23 
   2   0  -3   14.33    0.23 
   2   0  -3   15.87    0.27 
   2   0  -3   15.66    0.24 
   2   0  -3   15.48    0.31 
   2   0  -3   15.86    0.24 
  -2   0   3   15.45    0.29 
  -2   0   3   14.77    0.23 
  -2   0   3   16.19    0.24 
  -2   0   3   15.33    0.26 
  -2   0   3   14.53    0.23 
  -2   0   3   14.51    0.23 
   1   0  -3    9.00    0.10 
   1   0  -3    8.62    0.08 
   1   0  -3    9.25    0.12 
   1   0  -3    8.93    0.10 
   1   0  -3    8.66    0.09 
  -1   0   3    9.03    0.09 
  -1   0   3    9.53    0.10 
  -1   0   3    9.61    0.10 
  -1   0   3    9.50    0.12 
  -1   0   3    9.14    0.12 
  -1   0   3    8.68    0.09 
   0   0  -3    1.52    0.08 
   0   0  -3    1.65    0.14 
   0   0  -3    1.11    0.10 
   0   0   3    1.32    0.11 
   0   0   3    1.29    0.08 
   0   0   3    1.55    0.08 
   0   0   3    0.90    0.08 
  -1   0  -3   16.80    0.47 
  -1   0  -3   15.62    0.46 
  -1   0  -3   16.48    0.49 
  -1   0  -3   14.84    0.46 
  -1   0  -3   14.86    0.46 
  -1   0  -3   16.28    0.46 
  -1   0  -3   16.00    0.47 
   1   0   3   15.99    0.46 
   1   0   3   15.58    0.46 
   1   0   3   15.60    0.49 
   1   0   3   15.01    0.46 
   1   0   3   16.42    0.47 
   1   0   3   15.98    0.46 
  -2   0  -3    5.37    0.19 
  -2   0  -3    5.01    0.19 
  -2   0  -3    5.98    0.22 
   2   0   3    5.13    0.20 
   2   0   3    5.18    0.20 
   2   0   3    5.42    0.26 
   2   0   3    5.65    0.19 
   2   0   3    5.05    0.19 
   2   0   3    5.09    0.19 
  -3   0  -3   14.31    0.17 
  -3   0  -3   13.33    0.14 
  -3   0  -3   13.94    0.15 
  -3   0  -3   13.21    0.13 
   3   0   3   12.87    0.18 
   3   0   3   13.47    0.14 
   3   0   3   13.51    0.18 
   3   0   3   13.51    0.15 
  -4   0  -3    8.43    0.20 
  -4   0  -3    8.96    0.17 
  -4   0  -3    8.03    0.17 
   4   0   3    8.73    0.17 
   4   0   3    9.12    0.27 
   4   0   3    9.42    0.19 
   4   0   3    8.96    0.18 
   4   0   3    8.53    0.17 
   4   0   3    9.70    0.30 
  -5   0  -3    3.26    0.11 
  -5   0  -3    3.48    0.18 
  -5   0  -3    4.21    0.14 
   5   0   3    4.25    0.22 
   5   0   3    3.82    0.14 
   5   0   3    3.43    0.12 
   5   0   3    4.10    0.16 
   5   0   3    3.77    0.12 
   5   0   3    3.48    0.23 
  -6   0  -3   21.45    0.35 
  -6   0  -3   20.54    0.40 
   6   0   3   21.21    0.39 
   6   0   3   19.88    0.35 
   6   0   3   21.98    0.52 
   6   0   3   21.27    0.63 
  -7   0  -3    3.09    0.18 
  -7   0  -3    3.01    0.23 
   7   0   3    3.10    0.20 
   7   0   3    2.97    0.31 
   7   0   3    3.30    0.35 
  -8   0  -3    0.48    0.25 
   7  -1  -3    5.39    0.27 
   7  -1  -3    4.33    0.19 
   7  -1  -3    4.24    0.37 
  -7   1   3    5.22    0.22 
  -7   1   3    4.66    0.21 
   6  -1  -3    0.72    0.28 
   6  -1  -3    0.52    0.18 
   6  -1  -3    0.76    0.12 
  -6   1   3    0.69    0.15 
  -6   1   3    0.85    0.09 
  -6   1   3    0.97    0.14 
   5  -1  -3    0.10    0.11 
   5  -1  -3    0.26    0.09 
   5  -1  -3   -0.02    0.21 
  -5   1   3    0.28    0.06 
  -5   1   3    0.29    0.08 
  -5   1   3    0.39    0.12 
  -5   1   3    0.39    0.11 
  -5   1   3    0.22    0.11 
   4  -1  -3   55.95    0.59 
   4  -1  -3   56.39    0.52 
   4  -1  -3   55.26    0.49 
   4  -1  -3   56.15    0.50 
   4  -1  -3   55.80    0.49 
  -4   1   3   55.30    0.49 
  -4   1   3   55.90    0.48 
  -4   1   3   56.34    0.48 
  -4   1   3   54.82    0.49 
   3  -1  -3  168.71    1.84 
   3  -1  -3  170.58    1.84 
   3  -1  -3  171.45    1.84 
   3  -1  -3  170.18    1.89 
   3  -1  -3  169.84    1.86 
  -3   1   3  172.25    1.84 
  -3   1   3  169.60    1.88 
  -3   1   3  169.59    1.84 
  -3   1   3  171.65    1.84 
  -3   1   3  167.54    1.84 
  -3   1   3  169.14    1.84 
   2  -1  -3    8.14    0.31 
   2  -1  -3    8.20    0.26 
   2  -1  -3    8.77    0.24 
   2  -1  -3    8.92    0.24 
   2  -1  -3    7.99    0.24 
  -2   1   3    8.13    0.24 
  -2   1   3    8.19    0.30 
  -2   1   3    8.40    0.24 
  -2   1   3    8.79    0.24 
   1  -1  -3   25.46    0.60 
   1  -1  -3   26.07    0.63 
   1  -1  -3   25.48    0.61 
  -1   1   3   26.36    0.63 
  -1   1   3   26.28    0.60 
  -1   1   3   25.25    0.61 
  -1   1   3   25.48    0.60 
   0  -1  -3  125.16    1.70 
   0  -1  -3  125.79    1.71 
   0  -1  -3  129.40    1.72 
   0  -1  -3  124.39    1.71 
   0  -1  -3  123.33    1.70 
   0  -1  -3  126.46    1.70 
   0   1   3  126.17    1.70 
   0   1   3  128.05    1.71 
   0   1   3  126.15    1.71 
   0   1   3  122.82    1.70 
   0   1   3  120.47    1.70 
   0   1   3  125.31    1.71 
   0   1   3  125.88    1.70 
  -1  -1  -3   27.00    0.23 
  -1  -1  -3   27.57    0.27 
   1   1   3   27.03    0.23 
   1   1   3   27.98    0.28 
   1   1   3   26.62    0.23 
   1   1   3   27.30    0.23 
  -2  -1  -3  122.48    1.30 
  -2  -1  -3  119.67    1.28 
  -2  -1  -3  118.08    1.28 
  -2  -1  -3  120.31    1.28 
  -2  -1  -3  123.13    1.28 
  -2  -1  -3  121.42    1.28 
  -2  -1  -3  121.26    1.28 
   2   1   3  118.73    1.28 
   2   1   3  121.14    1.28 
   2   1   3  117.81    1.28 
   2   1   3  121.40    1.28 
   2   1   3  121.98    1.28 
   2   1   3  122.88    1.31 
  -3  -1  -3    4.40    0.21 
  -3  -1  -3    4.73    0.18 
  -3  -1  -3    4.34    0.19 
  -3  -1  -3    3.85    0.19 
  -3  -1  -3    3.90    0.22 
  -3  -1  -3    4.50    0.18 
   3   1   3    4.29    0.19 
   3   1   3    4.50    0.19 
   3   1   3    4.43    0.19 
   3   1   3    4.00    0.24 
   3   1   3    4.29    0.19 
   3   1   3    4.68    0.27 
  -4  -1  -3    1.55    0.08 
  -4  -1  -3    1.91    0.06 
  -4  -1  -3    1.86    0.12 
  -4  -1  -3    2.00    0.09 
  -4  -1  -3    1.98    0.12 
  -4  -1  -3    1.79    0.05 
   4   1   3    1.80    0.07 
   4   1   3    1.83    0.15 
   4   1   3    2.25    0.14 
   4   1   3    2.11    0.08 
   4   1   3    2.03    0.08 
   4   1   3    2.19    0.10 
  -5  -1  -3    7.47    0.11 
  -5  -1  -3    7.85    0.14 
  -5  -1  -3    7.26    0.15 
  -5  -1  -3    7.33    0.11 
   5   1   3    7.49    0.20 
   5   1   3    7.49    0.14 
   5   1   3    7.32    0.10 
   5   1   3    7.54    0.12 
   5   1   3    7.95    0.19 
   5   1   3    7.27    0.09 
  -6  -1  -3    3.27    0.15 
  -6  -1  -3    3.52    0.13 
  -6  -1  -3    3.11    0.18 
   6   1   3    3.90    0.27 
   6   1   3    3.80    0.20 
   6   1   3    3.90    0.19 
   6   1   3    3.02    0.12 
   6   1   3    3.53    0.24 
  -7  -1  -3   16.15    0.28 
  -7  -1  -3   15.64    0.34 
   7   1   3   16.11    0.33 
   7   1   3   14.78    0.39 
   7   1   3   16.42    0.44 
  -8  -1  -3    1.26    0.24 
   8   1   3    1.47    0.36 
   7  -2  -3    6.74    0.40 
   7  -2  -3    6.76    0.21 
   7  -2  -3    6.88    0.27 
  -7   2   3    7.12    0.22 
  -7   2   3    7.56    0.25 
   6  -2  -3   16.38    0.28 
   6  -2  -3   15.23    0.26 
   6  -2  -3   15.22    0.41 
  -6   2   3   16.03    0.27 
  -6   2   3   16.42    0.30 
   5  -2  -3    6.49    0.14 
   5  -2  -3    6.62    0.11 
   5  -2  -3    6.74    0.24 
  -5   2   3    6.50    0.15 
  -5   2   3    6.77    0.12 
  -5   2   3    6.68    0.13 
   4  -2  -3    0.63    0.09 
   4  -2  -3    0.74    0.11 
   4  -2  -3    0.78    0.19 
   4  -2  -3    0.67    0.08 
   4  -2  -3    1.12    0.13 
  -4   2   3    0.75    0.07 
  -4   2   3    0.35    0.09 
  -4   2   3    1.02    0.11 
  -4   2   3    0.62    0.06 
  -4   2   3    0.88    0.10 
   3  -2  -3   33.11    0.33 
   3  -2  -3   32.65    0.43 
   3  -2  -3   33.01    0.36 
   3  -2  -3   32.91    0.34 
   3  -2  -3   33.42    0.34 
   3  -2  -3   32.70    0.34 
  -3   2   3   32.28    0.39 
  -3   2   3   32.77    0.33 
  -3   2   3   32.98    0.34 
  -3   2   3   32.35    0.33 
  -3   2   3   33.27    0.33 
  -3   2   3   33.01    0.32 
   2  -2  -3   17.68    0.41 
   2  -2  -3   18.78    0.47 
   2  -2  -3   18.67    0.41 
   2  -2  -3   18.06    0.42 
   2  -2  -3   19.40    0.41 
   2  -2  -3   18.93    0.41 
  -2   2   3   18.41    0.41 
  -2   2   3   17.76    0.41 
  -2   2   3   18.61    0.45 
  -2   2   3   19.30    0.41 
  -2   2   3   19.51    0.41 
   1  -2  -3   38.74    1.91 
   1  -2  -3   43.15    1.93 
   1  -2  -3   39.34    1.91 
   1  -2  -3   41.42    1.91 
   1  -2  -3   41.84    1.91 
  -1   2   3   43.38    1.93 
  -1   2   3   40.77    1.91 
  -1   2   3   35.17    1.91 
  -1   2   3   43.52    1.91 
   0  -2  -3   24.02    0.38 
   0  -2  -3   24.19    0.38 
   0  -2  -3   23.08    0.38 
   0  -2  -3   23.69    0.40 
   0  -2  -3   23.94    0.38 
   0  -2  -3   24.74    0.38 
   0  -2  -3   25.71    0.41 
   0   2   3   24.92    0.38 
   0   2   3   25.94    0.42 
   0   2   3   24.73    0.38 
   0   2   3   24.44    0.39 
   0   2   3   23.88    0.39 
   0   2   3   23.31    0.38 
  -1  -2  -3  257.01    3.03 
  -1  -2  -3  252.42    3.03 
  -1  -2  -3  256.41    3.04 
  -1  -2  -3  255.48    3.03 
   1   2   3  257.29    3.03 
   1   2   3  257.77    3.03 
   1   2   3  255.97    3.05 
   1   2   3  249.74    3.03 
   1   2   3  250.70    3.03 
  -2  -2  -3   26.55    0.30 
  -2  -2  -3   27.82    0.31 
  -2  -2  -3   28.12    0.30 
  -2  -2  -3   27.93    0.34 
   2   2   3   28.12    0.30 
   2   2   3   28.15    0.35 
   2   2   3   27.98    0.30 
   2   2   3   26.57    0.30 
  -3  -2  -3   22.16    0.19 
  -3  -2  -3   21.83    0.18 
  -3  -2  -3   21.59    0.21 
  -3  -2  -3   22.89    0.19 
  -3  -2  -3   22.34    0.17 
  -3  -2  -3   22.38    0.18 
   3   2   3   22.60    0.27 
   3   2   3   22.60    0.19 
   3   2   3   22.52    0.18 
   3   2   3   21.92    0.18 
   3   2   3   21.85    0.18 
  -4  -2  -3    4.45    0.12 
  -4  -2  -3    3.87    0.12 
  -4  -2  -3    4.49    0.12 
  -4  -2  -3    4.07    0.13 
  -4  -2  -3    3.82    0.14 
  -4  -2  -3    4.23    0.14 
  -4  -2  -3    3.57    0.12 
   4   2   3    4.46    0.13 
   4   2   3    3.64    0.17 
   4   2   3    3.89    0.13 
   4   2   3    3.68    0.11 
   4   2   3    4.39    0.14 
  -5  -2  -3    6.53    0.12 
  -5  -2  -3    6.85    0.15 
  -5  -2  -3    6.52    0.16 
  -5  -2  -3    7.04    0.13 
  -5  -2  -3    6.96    0.11 
  -5  -2  -3    7.29    0.16 
   5   2   3    6.93    0.15 
   5   2   3    6.48    0.22 
   5   2   3    7.28    0.15 
   5   2   3    6.79    0.16 
   5   2   3    6.75    0.16 
   5   2   3    6.96    0.20 
  -6  -2  -3    0.26    0.17 
  -6  -2  -3    0.14    0.15 
  -6  -2  -3    0.35    0.07 
  -6  -2  -3    0.26    0.11 
  -6  -2  -3    0.40    0.16 
  -6  -2  -3    0.32    0.07 
   6   2   3    0.41    0.24 
   6   2   3   -0.18    0.16 
   6   2   3    0.38    0.12 
   6   2   3    0.34    0.23 
  -7  -2  -3    1.80    0.14 
  -7  -2  -3    1.48    0.20 
   7   2   3    1.06    0.28 
   7   2   3    1.58    0.15 
  -8  -2  -3    1.50    0.26 
   8   2   3    1.22    0.25 
   7  -3  -3    3.32    0.39 
   7  -3  -3    3.42    0.26 
  -7   3   3    3.79    0.22 
   6  -3  -3    8.11    0.19 
   6  -3  -3    8.45    0.22 
   6  -3  -3    8.25    0.36 
  -6   3   3    8.84    0.24 
  -6   3   3    8.74    0.22 
   5  -3  -3    0.13    0.10 
   5  -3  -3    0.90    0.26 
   5  -3  -3   -0.01    0.14 
   5  -3  -3    0.44    0.13 
  -5   3   3    0.62    0.14 
  -5   3   3    0.02    0.12 
  -5   3   3    0.62    0.17 
   4  -3  -3    5.13    0.12 
   4  -3  -3    4.80    0.11 
   4  -3  -3    5.19    0.21 
   4  -3  -3    4.99    0.14 
   4  -3  -3    4.78    0.10 
   4  -3  -3    4.79    0.09 
  -4   3   3    5.19    0.14 
  -4   3   3    5.02    0.10 
  -4   3   3    5.16    0.13 
   3  -3  -3    3.09    0.21 
   3  -3  -3    3.59    0.18 
   3  -3  -3    2.93    0.14 
   3  -3  -3    2.92    0.14 
   3  -3  -3    3.52    0.16 
  -3   3   3    3.42    0.14 
  -3   3   3    3.07    0.19 
  -3   3   3    2.83    0.13 
  -3   3   3    3.27    0.15 
   2  -3  -3   22.40    0.42 
   2  -3  -3   21.94    0.34 
   2  -3  -3   21.86    0.35 
   2  -3  -3   21.35    0.33 
   2  -3  -3   21.50    0.33 
   2  -3  -3   22.27    0.34 
  -2   3   3   22.57    0.33 
  -2   3   3   22.24    0.34 
  -2   3   3   21.48    0.33 
  -2   3   3   21.52    0.33 
   1  -3  -3    2.32    0.11 
   1  -3  -3    2.56    0.11 
   1  -3  -3    2.36    0.10 
   1  -3  -3    2.28    0.11 
   1  -3  -3    2.21    0.11 
   1  -3  -3    1.99    0.14 
  -1   3   3    2.20    0.10 
  -1   3   3    2.44    0.11 
  -1   3   3    2.39    0.10 
  -1   3   3    2.34    0.10 
  -1   3   3    2.33    0.10 
   0  -3  -3    1.41    0.09 
   0  -3  -3    1.38    0.08 
   0  -3  -3    1.61    0.09 
   0  -3  -3    1.49    0.08 
   0  -3  -3    1.76    0.09 
   0  -3  -3    1.46    0.10 
   0   3   3    1.57    0.08 
   0   3   3    1.60    0.10 
   0   3   3    1.59    0.08 
   0   3   3    1.44    0.08 
   0   3   3    1.22    0.10 
  -1  -3  -3  993.24   11.26 
  -1  -3  -3  985.30   11.26 
  -1  -3  -3  999.46   11.25 
  -1  -3  -3  998.16   11.26 
  -1  -3  -3  994.27   11.27 
   1   3   3  986.80   11.25 
   1   3   3  998.62   11.26 
   1   3   3  987.79   11.26 
   1   3   3 1000.00   11.26 
   1   3   3  983.16   11.26 
   1   3   3  995.02   11.27 
  -2  -3  -3    3.51    0.18 
  -2  -3  -3    3.83    0.21 
  -2  -3  -3    3.44    0.18 
  -2  -3  -3    3.21    0.17 
  -2  -3  -3    2.99    0.21 
  -2  -3  -3    3.46    0.17 
   2   3   3    3.00    0.23 
   2   3   3    3.26    0.17 
   2   3   3    3.06    0.17 
   2   3   3    3.11    0.18 
   2   3   3    3.08    0.18 
  -3  -3  -3   65.22    0.55 
  -3  -3  -3   65.85    0.53 
  -3  -3  -3   64.96    0.53 
  -3  -3  -3   64.39    0.53 
   3   3   3   63.54    0.53 
   3   3   3   65.46    0.58 
   3   3   3   65.51    0.53 
   3   3   3   64.46    0.53 
   3   3   3   64.76    0.53 
  -4  -3  -3   11.05    0.27 
  -4  -3  -3   11.75    0.28 
  -4  -3  -3   10.80    0.27 
  -4  -3  -3   10.39    0.31 
  -4  -3  -3   10.86    0.28 
  -4  -3  -3   11.31    0.27 
   4   3   3   12.21    0.33 
   4   3   3   11.22    0.27 
   4   3   3   11.69    0.28 
   4   3   3   11.89    0.27 
   4   3   3   11.51    0.27 
   4   3   3   10.47    0.36 
  -5  -3  -3   29.04    0.36 
  -5  -3  -3   29.62    0.39 
  -5  -3  -3   29.97    0.43 
  -5  -3  -3   30.13    0.37 
  -5  -3  -3   28.28    0.43 
  -5  -3  -3   28.69    0.35 
   5   3   3   29.21    0.45 
   5   3   3   28.78    0.50 
   5   3   3   28.73    0.39 
   5   3   3   29.24    0.38 
   5   3   3   30.08    0.37 
  -6  -3  -3   12.79    0.17 
  -6  -3  -3   12.36    0.24 
  -6  -3  -3   12.95    0.18 
  -6  -3  -3   12.82    0.19 
  -6  -3  -3   12.27    0.24 
  -6  -3  -3   13.20    0.23 
   6   3   3   13.45    0.25 
   6   3   3   12.67    0.30 
   6   3   3   12.63    0.30 
   6   3   3   12.96    0.27 
   6   3   3   13.01    0.21 
  -7  -3  -3    0.35    0.18 
   7   3   3    0.13    0.20 
   7   3   3    0.09    0.16 
  -8  -3  -3    1.01    0.22 
   8   3   3    0.40    0.22 
   8   3   3    0.74    0.32 
   7  -4  -3    0.18    0.38 
   7  -4  -3    0.13    0.22 
  -7   4   3    0.14    0.21 
   6  -4  -3    1.63    0.33 
   6  -4  -3    1.23    0.16 
  -6   4   3    1.54    0.19 
   5  -4  -3   35.03    0.66 
   5  -4  -3   34.53    0.48 
   5  -4  -3   32.51    0.47 
   5  -4  -3   33.52    0.46 
  -5   4   3   35.49    0.48 
   4  -4  -3    2.04    0.13 
   4  -4  -3    2.06    0.16 
   4  -4  -3    2.21    0.24 
   4  -4  -3    1.45    0.12 
   4  -4  -3    1.92    0.11 
   4  -4  -3    2.01    0.10 
  -4   4   3    2.21    0.14 
  -4   4   3    1.24    0.10 
   3  -4  -3   13.94    0.28 
   3  -4  -3   13.50    0.19 
   3  -4  -3   13.50    0.18 
   3  -4  -3   13.89    0.19 
   3  -4  -3   13.17    0.16 
  -3   4   3   13.53    0.18 
  -3   4   3   13.72    0.18 
   2  -4  -3    5.63    0.20 
   2  -4  -3    5.87    0.13 
   2  -4  -3    5.72    0.15 
   2  -4  -3    5.37    0.14 
   2  -4  -3    5.55    0.13 
  -2   4   3    5.70    0.12 
  -2   4   3    5.17    0.11 
  -2   4   3    5.53    0.14 
  -2   4   3    5.08    0.11 
   1  -4  -3    9.79    0.14 
   1  -4  -3   10.00    0.14 
   1  -4  -3   10.03    0.18 
   1  -4  -3    9.68    0.13 
   1  -4  -3    9.96    0.13 
   1  -4  -3   10.08    0.15 
   1  -4  -3    9.39    0.15 
  -1   4   3    9.81    0.13 
  -1   4   3   10.12    0.13 
  -1   4   3   10.03    0.14 
  -1   4   3    9.64    0.13 
  -1   4   3    9.84    0.12 
   0  -4  -3   25.71    0.31 
   0  -4  -3   25.30    0.28 
   0  -4  -3   25.96    0.28 
   0  -4  -3   25.48    0.28 
   0  -4  -3   25.76    0.28 
   0  -4  -3   26.19    0.28 
   0   4   3   25.87    0.27 
   0   4   3   25.94    0.28 
   0   4   3   25.94    0.32 
   0   4   3   25.56    0.27 
   0   4   3   26.15    0.28 
  -1  -4  -3   22.65    0.18 
  -1  -4  -3   22.61    0.22 
  -1  -4  -3   22.61    0.19 
  -1  -4  -3   21.78    0.18 
  -1  -4  -3   22.66    0.18 
   1   4   3   22.25    0.18 
   1   4   3   22.52    0.18 
   1   4   3   21.99    0.19 
   1   4   3   23.50    0.23 
   1   4   3   22.06    0.18 
   1   4   3   23.07    0.19 
  -2  -4  -3   29.53    0.45 
  -2  -4  -3   27.60    0.45 
  -2  -4  -3   27.00    0.46 
  -2  -4  -3   27.48    0.44 
   2   4   3   27.75    0.44 
   2   4   3   27.48    0.48 
   2   4   3   26.81    0.44 
   2   4   3   29.20    0.45 
   2   4   3   27.71    0.44 
  -3  -4  -3   30.41    0.51 
  -3  -4  -3   29.00    0.48 
  -3  -4  -3   30.62    0.49 
   3   4   3   29.98    0.48 
   3   4   3   30.58    0.48 
   3   4   3   28.70    0.48 
   3   4   3   29.36    0.52 
   3   4   3   30.44    0.48 
  -4  -4  -3    3.90    0.12 
  -4  -4  -3    3.52    0.13 
   4   4   3    4.17    0.14 
   4   4   3    4.12    0.17 
  -5  -4  -3   24.79    0.30 
  -5  -4  -3   26.03    0.32 
  -5  -4  -3   25.06    0.38 
  -5  -4  -3   25.65    0.32 
  -5  -4  -3   26.69    0.33 
   5   4   3   25.71    0.32 
   5   4   3   27.12    0.33 
   5   4   3   26.23    0.40 
   5   4   3   25.60    0.45 
   5   4   3   26.71    0.34 
  -6  -4  -3   15.14    0.33 
  -6  -4  -3   15.14    0.25 
  -6  -4  -3   15.96    0.26 
  -6  -4  -3   14.86    0.23 
   6   4   3   15.85    0.29 
   6   4   3   16.16    0.30 
   6   4   3   15.20    0.27 
   6   4   3   15.41    0.38 
   6   4   3   14.90    0.33 
  -7  -4  -3    0.66    0.17 
  -7  -4  -3    0.73    0.15 
   7   4   3   -0.23    0.29 
   7   4   3    0.48    0.17 
  -8  -4  -3    0.56    0.22 
   8   4   3    0.59    0.31 
   8   4   3    0.10    0.18 
   6  -5  -3    0.32    0.33 
   6  -5  -3    0.04    0.17 
  -6   5   3   -0.14    0.19 
   5  -5  -3    0.15    0.27 
   5  -5  -3   -0.22    0.14 
   5  -5  -3    0.15    0.14 
   5  -5  -3    0.21    0.11 
  -5   5   3   -0.14    0.16 
   4  -5  -3   23.32    0.50 
   4  -5  -3   22.23    0.32 
   4  -5  -3   24.13    0.38 
   4  -5  -3   22.79    0.33 
   4  -5  -3   23.08    0.32 
  -4   5   3   24.28    0.34 
  -4   5   3   23.95    0.32 
   3  -5  -3   12.10    0.28 
   3  -5  -3   11.40    0.16 
   3  -5  -3   12.00    0.18 
   3  -5  -3   11.94    0.18 
   3  -5  -3   11.82    0.17 
  -3   5   3   11.70    0.16 
  -3   5   3   12.06    0.19 
   2  -5  -3   15.08    0.22 
   2  -5  -3   15.21    0.14 
   2  -5  -3   14.93    0.15 
   2  -5  -3   14.76    0.14 
   2  -5  -3   14.71    0.13 
   2  -5  -3   15.01    0.18 
  -2   5   3   15.19    0.15 
  -2   5   3   14.28    0.10 
   1  -5  -3    4.41    0.14 
   1  -5  -3    4.52    0.09 
   1  -5  -3    4.48    0.09 
   1  -5  -3    4.50    0.08 
   1  -5  -3    4.71    0.10 
   1  -5  -3    4.51    0.12 
   1  -5  -3    4.77    0.10 
  -1   5   3    4.61    0.08 
  -1   5   3    4.64    0.08 
  -1   5   3    4.41    0.07 
  -1   5   3    4.31    0.07 
  -1   5   3    4.42    0.09 
   0  -5  -3    0.54    0.09 
   0  -5  -3    0.55    0.07 
   0  -5  -3    0.55    0.07 
   0  -5  -3    0.54    0.07 
   0  -5  -3    0.72    0.07 
   0  -5  -3    0.48    0.07 
   0   5   3    0.48    0.08 
   0   5   3    0.43    0.06 
   0   5   3    0.65    0.06 
   0   5   3    0.54    0.05 
   0   5   3    0.92    0.09 
   0   5   3    0.71    0.07 
  -1  -5  -3   28.85    0.37 
  -1  -5  -3   29.80    0.37 
  -1  -5  -3   29.61    0.40 
  -1  -5  -3   30.17    0.37 
  -1  -5  -3   29.87    0.37 
   1   5   3   29.42    0.37 
   1   5   3   28.75    0.37 
   1   5   3   29.92    0.37 
   1   5   3   30.74    0.41 
   1   5   3   29.63    0.37 
   1   5   3   29.74    0.37 
  -2  -5  -3  137.27    1.17 
  -2  -5  -3  137.71    1.18 
  -2  -5  -3  136.57    1.16 
  -2  -5  -3  138.05    1.16 
  -2  -5  -3  138.38    1.16 
   2   5   3  138.33    1.16 
   2   5   3  138.73    1.16 
   2   5   3  138.77    1.16 
   2   5   3  140.42    1.19 
   2   5   3  137.04    1.16 
  -3  -5  -3   21.30    0.30 
  -3  -5  -3   20.28    0.26 
  -3  -5  -3   21.05    0.23 
  -3  -5  -3   21.16    0.24 
  -3  -5  -3   20.08    0.24 
  -3  -5  -3   20.47    0.23 
   3   5   3   20.89    0.24 
   3   5   3   21.10    0.30 
   3   5   3   20.78    0.24 
   3   5   3   20.93    0.23 
   3   5   3   21.36    0.24 
  -4  -5  -3    3.19    0.14 
  -4  -5  -3    4.38    0.19 
  -4  -5  -3    3.00    0.15 
  -4  -5  -3    2.14    0.17 
  -4  -5  -3    2.08    0.13 
   4   5   3    2.69    0.14 
   4   5   3    3.65    0.17 
   4   5   3    2.78    0.19 
   4   5   3    3.30    0.15 
  -5  -5  -3   14.89    0.23 
  -5  -5  -3   15.53    0.25 
  -5  -5  -3   14.63    0.22 
  -5  -5  -3   15.10    0.25 
   5   5   3   14.24    0.31 
   5   5   3   14.28    0.24 
   5   5   3   15.65    0.24 
   5   5   3   14.94    0.25 
  -6  -5  -3    7.21    0.20 
  -6  -5  -3    8.03    0.17 
  -6  -5  -3    6.98    0.18 
  -6  -5  -3    7.73    0.18 
   6   5   3    7.39    0.28 
   6   5   3    7.42    0.17 
   6   5   3    8.39    0.21 
  -7  -5  -3    2.85    0.20 
  -7  -5  -3    2.71    0.19 
   7   5   3    2.75    0.30 
   7   5   3    2.77    0.20 
   7   5   3    1.56    0.30 
  -8  -5  -3    0.28    0.19 
   8   5   3    0.00    0.19 
   8   5   3    1.39    0.34 
   6  -6  -3    1.07    0.18 
   6  -6  -3    0.56    0.34 
  -6   6   3    0.40    0.23 
   5  -6  -3    2.15    0.17 
   5  -6  -3    2.44    0.34 
  -5   6   3    1.93    0.21 
   4  -6  -3    0.29    0.12 
   4  -6  -3    0.44    0.27 
   4  -6  -3    0.36    0.11 
   4  -6  -3    0.68    0.13 
  -4   6   3    0.38    0.17 
   3  -6  -3    0.36    0.07 
   3  -6  -3    0.42    0.11 
   3  -6  -3    0.76    0.21 
   3  -6  -3    0.45    0.09 
   3  -6  -3    0.54    0.10 
  -3   6   3    0.22    0.12 
  -3   6   3    0.38    0.08 
   2  -6  -3   13.49    0.18 
   2  -6  -3   14.20    0.20 
   2  -6  -3   13.96    0.19 
   2  -6  -3   14.02    0.27 
   2  -6  -3   13.81    0.20 
  -2   6   3   13.51    0.19 
   1  -6  -3  101.45    1.08 
   1  -6  -3  100.28    1.04 
   1  -6  -3  100.03    1.05 
   1  -6  -3  103.03    1.04 
   1  -6  -3  101.42    1.04 
   1  -6  -3  101.99    1.04 
  -1   6   3  101.85    1.04 
  -1   6   3  100.95    1.04 
  -1   6   3  102.48    1.05 
  -1   6   3  101.84    1.04 
  -1   6   3  102.39    1.03 
   0  -6  -3    0.85    0.10 
   0  -6  -3    0.52    0.08 
   0  -6  -3    0.41    0.09 
   0  -6  -3    0.98    0.09 
   0  -6  -3    0.61    0.09 
   0  -6  -3    0.78    0.11 
   0   6   3    0.71    0.09 
   0   6   3    0.79    0.09 
   0   6   3    0.79    0.10 
   0   6   3    0.78    0.11 
   0   6   3    0.45    0.08 
   0   6   3    0.72    0.08 
  -1  -6  -3    4.04    0.21 
  -1  -6  -3    3.68    0.24 
  -1  -6  -3    4.14    0.20 
  -1  -6  -3    4.06    0.20 
  -1  -6  -3    4.35    0.21 
   1   6   3    4.09    0.20 
   1   6   3    4.01    0.20 
   1   6   3    4.67    0.20 
   1   6   3    3.89    0.21 
   1   6   3    4.53    0.19 
   1   6   3    4.63    0.21 
   1   6   3    4.13    0.19 
   1   6   3    4.18    0.26 
  -2  -6  -3   60.55    0.68 
  -2  -6  -3   60.51    0.67 
  -2  -6  -3   60.86    0.66 
  -2  -6  -3   59.25    0.66 
  -2  -6  -3   61.27    0.67 
   2   6   3   61.72    0.66 
   2   6   3   60.35    0.66 
   2   6   3   61.02    0.66 
   2   6   3   61.17    0.66 
   2   6   3   61.51    0.70 
   2   6   3   61.03    0.67 
  -3  -6  -3   73.94    0.73 
  -3  -6  -3   74.25    0.73 
  -3  -6  -3   74.80    0.74 
  -3  -6  -3   74.66    0.74 
  -3  -6  -3   73.62    0.75 
   3   6   3   74.30    0.74 
   3   6   3   75.08    0.74 
   3   6   3   75.50    0.78 
   3   6   3   74.46    0.74 
   3   6   3   74.14    0.73 
   3   6   3   74.47    0.74 
  -4  -6  -3   13.41    0.26 
  -4  -6  -3   13.25    0.28 
  -4  -6  -3   12.29    0.29 
  -4  -6  -3   15.35    0.29 
   4   6   3   13.17    0.36 
   4   6   3   14.23    0.28 
   4   6   3   14.03    0.27 
   4   6   3   13.97    0.27 
  -5  -6  -3   -0.23    0.12 
  -5  -6  -3   -0.12    0.14 
  -5  -6  -3   -0.36    0.15 
   5   6   3   -0.02    0.17 
   5   6   3   -0.09    0.14 
   5   6   3    0.24    0.13 
   5   6   3   -0.11    0.12 
  -6  -6  -3    0.69    0.16 
  -6  -6  -3    0.53    0.14 
   6   6   3    0.41    0.14 
   6   6   3    0.64    0.19 
   6   6   3    0.55    0.24 
  -7  -6  -3    6.55    0.25 
  -7  -6  -3    6.28    0.19 
   7   6   3    6.23    0.28 
   7   6   3    6.53    0.26 
   7   6   3    6.80    0.30 
  -8  -6  -3    2.94    0.20 
  -8  -6  -3    3.08    0.26 
   8   6   3    2.97    0.31 
   5  -7  -3    5.73    0.19 
   5  -7  -3    5.51    0.39 
  -5   7   3    6.14    0.26 
   4  -7  -3    2.90    0.13 
   4  -7  -3    2.81    0.14 
   4  -7  -3    3.26    0.14 
   4  -7  -3    3.46    0.33 
  -4   7   3    3.29    0.20 
   3  -7  -3    1.73    0.07 
   3  -7  -3    1.27    0.11 
   3  -7  -3    1.66    0.11 
   3  -7  -3    2.17    0.23 
   3  -7  -3    1.79    0.10 
  -3   7   3    1.60    0.15 
   2  -7  -3    4.70    0.15 
   2  -7  -3    4.32    0.13 
   2  -7  -3    4.51    0.14 
   2  -7  -3    4.49    0.24 
   2  -7  -3    4.78    0.15 
  -2   7   3    4.96    0.18 
   1  -7  -3   11.38    0.20 
   1  -7  -3   12.79    0.22 
   1  -7  -3   11.89    0.21 
   1  -7  -3   12.40    0.22 
   1  -7  -3   11.68    0.28 
  -1   7   3   12.10    0.20 
  -1   7   3   11.96    0.19 
  -1   7   3   12.09    0.22 
  -1   7   3   11.74    0.19 
   0  -7  -3   99.86    1.12 
   0  -7  -3   99.50    1.12 
   0  -7  -3  101.44    1.14 
   0  -7  -3  100.58    1.12 
   0  -7  -3  100.67    1.11 
   0  -7  -3   97.82    1.11 
   0   7   3  100.84    1.11 
   0   7   3   99.98    1.11 
   0   7   3  101.73    1.13 
   0   7   3   99.21    1.11 
   0   7   3   99.78    1.11 
  -1  -7  -3    2.91    0.19 
  -1  -7  -3    3.58    0.21 
  -1  -7  -3    2.51    0.19 
  -1  -7  -3    2.46    0.19 
  -1  -7  -3    2.61    0.23 
  -1  -7  -3    2.70    0.18 
   1   7   3    3.08    0.21 
   1   7   3    3.05    0.24 
   1   7   3    3.30    0.19 
   1   7   3    3.04    0.18 
   1   7   3    3.24    0.20 
  -2  -7  -3    1.55    0.10 
  -2  -7  -3    2.09    0.13 
  -2  -7  -3    1.62    0.10 
  -2  -7  -3    1.76    0.11 
   2   7   3    2.30    0.09 
   2   7   3    1.96    0.10 
   2   7   3    1.80    0.10 
   2   7   3    1.86    0.12 
   2   7   3    1.85    0.12 
   2   7   3    1.97    0.12 
   2   7   3    1.61    0.13 
   2   7   3    2.29    0.12 
  -3  -7  -3    8.93    0.23 
  -3  -7  -3    7.03    0.16 
  -3  -7  -3    7.16    0.18 
  -3  -7  -3    7.59    0.21 
   3   7   3    8.14    0.19 
   3   7   3    7.44    0.21 
   3   7   3    7.85    0.19 
   3   7   3    7.97    0.20 
   3   7   3    7.56    0.22 
  -4  -7  -3   17.74    0.20 
  -4  -7  -3   16.82    0.18 
  -4  -7  -3   16.53    0.16 
   4   7   3   16.63    0.22 
   4   7   3   17.07    0.17 
   4   7   3   16.48    0.17 
   4   7   3   17.13    0.22 
   4   7   3   16.93    0.19 
  -5  -7  -3    4.89    0.16 
  -5  -7  -3    5.46    0.19 
  -5  -7  -3    3.72    0.19 
   5   7   3    5.30    0.18 
   5   7   3    4.73    0.21 
   5   7   3    5.50    0.18 
   5   7   3    4.59    0.16 
  -6  -7  -3    0.12    0.13 
  -6  -7  -3    0.12    0.16 
  -6  -7  -3   -0.26    0.20 
   6   7   3    0.39    0.27 
   6   7   3    0.08    0.20 
   6   7   3    0.25    0.18 
  -7  -7  -3    1.36    0.16 
  -7  -7  -3    1.19    0.20 
   7   7   3    1.02    0.18 
  -8  -7  -3    1.54    0.19 
  -8  -7  -3    1.86    0.24 
   8   7   3    1.98    0.27 
   8   7   3    1.71    0.21 
   5  -8  -3    2.44    0.16 
   5  -8  -3    2.79    0.38 
  -5   8   3    2.70    0.24 
   4  -8  -3    7.31    0.36 
   4  -8  -3    7.63    0.18 
  -4   8   3    7.10    0.24 
   3  -8  -3    1.83    0.11 
   3  -8  -3    1.87    0.12 
   3  -8  -3    2.42    0.15 
   3  -8  -3    1.64    0.12 
   3  -8  -3    1.75    0.27 
  -3   8   3    2.42    0.19 
   2  -8  -3    1.05    0.22 
   2  -8  -3    0.94    0.10 
   2  -8  -3    1.15    0.11 
   2  -8  -3    1.08    0.09 
  -2   8   3    1.02    0.14 
   1  -8  -3   11.53    0.24 
   1  -8  -3   11.49    0.25 
   1  -8  -3   11.20    0.32 
   1  -8  -3   11.95    0.24 
  -1   8   3   12.08    0.21 
  -1   8   3   11.34    0.21 
  -1   8   3   12.35    0.25 
  -1   8   3   11.04    0.22 
   0  -8  -3   36.72    0.38 
   0  -8  -3   36.95    0.38 
   0  -8  -3   37.11    0.38 
   0  -8  -3   35.75    0.42 
   0   8   3   36.99    0.37 
   0   8   3   37.21    0.37 
   0   8   3   36.40    0.37 
   0   8   3   37.41    0.37 
   0   8   3   36.75    0.40 
  -1  -8  -3   25.72    0.33 
  -1  -8  -3   24.96    0.31 
  -1  -8  -3   25.95    0.32 
  -1  -8  -3   26.73    0.32 
  -1  -8  -3   25.80    0.31 
   1   8   3   25.80    0.31 
   1   8   3   26.71    0.30 
   1   8   3   26.81    0.30 
   1   8   3   26.06    0.33 
  -2  -8  -3    2.27    0.11 
  -2  -8  -3    2.22    0.11 
  -2  -8  -3    2.24    0.12 
  -2  -8  -3    2.33    0.14 
   2   8   3    2.60    0.11 
   2   8   3    2.21    0.11 
   2   8   3    2.22    0.14 
   2   8   3    1.98    0.12 
   2   8   3    1.90    0.14 
   2   8   3    1.83    0.13 
   2   8   3    2.33    0.13 
   2   8   3    2.10    0.11 
  -3  -8  -3    0.42    0.10 
  -3  -8  -3    0.43    0.10 
  -3  -8  -3    0.56    0.14 
  -3  -8  -3    0.55    0.13 
   3   8   3    0.31    0.15 
   3   8   3    0.83    0.13 
   3   8   3    0.41    0.11 
   3   8   3    0.67    0.14 
   3   8   3    0.60    0.14 
  -4  -8  -3    7.27    0.15 
  -4  -8  -3    7.36    0.17 
  -4  -8  -3    6.73    0.13 
   4   8   3    6.54    0.15 
   4   8   3    6.90    0.15 
   4   8   3    7.23    0.19 
   4   8   3    7.44    0.15 
  -5  -8  -3   13.45    0.29 
  -5  -8  -3   13.93    0.24 
   5   8   3   14.05    0.24 
   5   8   3   13.01    0.26 
   5   8   3   13.25    0.24 
   5   8   3   12.84    0.27 
  -6  -8  -3    2.06    0.15 
  -6  -8  -3    2.93    0.24 
   6   8   3    2.58    0.25 
   6   8   3    2.14    0.21 
   6   8   3    2.52    0.28 
  -7  -8  -3    2.56    0.17 
  -7  -8  -3    2.42    0.25 
   7   8   3    2.13    0.25 
   7   8   3    2.57    0.26 
  -8  -8  -3    0.09    0.27 
  -8  -8  -3    0.01    0.18 
   8   8   3   -0.01    0.24 
   8   8   3    0.70    0.31 
   4  -9  -3    2.72    0.15 
   4  -9  -3    2.70    0.36 
  -4   9   3    2.82    0.24 
   3  -9  -3    2.99    0.33 
   3  -9  -3    2.93    0.17 
  -3   9   3    3.06    0.23 
   2  -9  -3    2.27    0.27 
   2  -9  -3    2.12    0.12 
   2  -9  -3    2.29    0.14 
   2  -9  -3    2.41    0.13 
  -2   9   3    2.64    0.19 
   1  -9  -3    0.81    0.10 
   1  -9  -3    0.34    0.13 
   1  -9  -3    0.88    0.12 
   1  -9  -3    0.67    0.10 
  -1   9   3    0.74    0.07 
  -1   9   3    0.60    0.14 
   0  -9  -3   12.93    0.23 
   0  -9  -3   13.19    0.23 
   0  -9  -3   12.67    0.23 
   0   9   3   12.30    0.21 
   0   9   3   13.30    0.21 
   0   9   3   12.76    0.22 
   0   9   3   13.00    0.27 
   0   9   3   12.57    0.20 
  -1  -9  -3   21.06    0.34 
  -1  -9  -3   21.60    0.31 
  -1  -9  -3   21.81    0.32 
  -1  -9  -3   21.77    0.31 
   1   9   3   22.20    0.31 
   1   9   3   21.11    0.31 
   1   9   3   22.29    0.30 
   1   9   3   22.74    0.31 
   1   9   3   22.19    0.34 
  -2  -9  -3    1.76    0.10 
  -2  -9  -3    1.97    0.15 
  -2  -9  -3    2.10    0.12 
  -2  -9  -3    2.30    0.14 
   2   9   3    2.30    0.14 
   2   9   3    1.82    0.13 
   2   9   3    2.42    0.12 
   2   9   3    2.43    0.16 
   2   9   3    1.27    0.12 
   2   9   3    2.04    0.14 
  -3  -9  -3   12.67    0.26 
  -3  -9  -3   12.73    0.24 
  -3  -9  -3   12.53    0.25 
  -3  -9  -3   11.44    0.21 
   3   9   3   12.84    0.26 
   3   9   3   12.61    0.24 
   3   9   3   11.88    0.24 
   3   9   3   11.64    0.19 
   3   9   3   11.67    0.24 
   3   9   3   12.49    0.25 
  -4  -9  -3    0.60    0.21 
  -4  -9  -3    0.34    0.15 
  -4  -9  -3    0.33    0.13 
   4   9   3    0.20    0.16 
   4   9   3    0.21    0.18 
   4   9   3    0.37    0.15 
  -5  -9  -3    6.62    0.24 
  -5  -9  -3    5.90    0.22 
   5   9   3    5.66    0.23 
   5   9   3    5.15    0.21 
   5   9   3    5.62    0.27 
   5   9   3    6.47    0.23 
   5   9   3    5.44    0.20 
  -6  -9  -3    5.70    0.30 
   6   9   3    4.81    0.28 
   6   9   3    5.39    0.24 
   6   9   3    5.01    0.27 
  -7  -9  -3    4.10    0.23 
  -7  -9  -3    4.17    0.18 
   7   9   3    4.42    0.26 
   7   9   3    4.65    0.37 
   7   9   3    3.98    0.34 
   4 -10  -3    1.70    0.15 
   4 -10  -3    1.65    0.36 
  -4  10   3    1.77    0.24 
   3 -10  -3    9.43    0.41 
   3 -10  -3    9.24    0.20 
  -3  10   3   10.36    0.26 
   2 -10  -3    7.03    0.17 
   2 -10  -3    6.35    0.16 
   2 -10  -3    7.16    0.33 
  -2  10   3    7.48    0.23 
   1 -10  -3    5.86    0.15 
   1 -10  -3    5.89    0.14 
  -1  10   3    6.36    0.19 
   0 -10  -3    0.02    0.11 
   0 -10  -3   -0.10    0.13 
   0 -10  -3   -0.21    0.13 
   0 -10  -3   -0.06    0.11 
   0  10   3    0.04    0.08 
   0  10   3   -0.06    0.09 
   0  10   3   -0.18    0.17 
   0  10   3   -0.26    0.13 
   0  10   3    0.09    0.09 
  -1 -10  -3    0.93    0.13 
  -1 -10  -3    0.72    0.14 
  -1 -10  -3    0.96    0.11 
  -1 -10  -3    0.91    0.11 
   1  10   3    0.98    0.11 
   1  10   3    1.36    0.14 
   1  10   3    1.08    0.12 
   1  10   3    0.85    0.16 
   1  10   3    0.96    0.10 
  -2 -10  -3    6.37    0.18 
  -2 -10  -3    6.84    0.16 
  -2 -10  -3    6.31    0.13 
  -2 -10  -3    6.65    0.12 
   2  10   3    7.07    0.14 
   2  10   3    6.59    0.19 
   2  10   3    6.74    0.17 
   2  10   3    6.66    0.15 
  -3 -10  -3    0.85    0.11 
  -3 -10  -3    0.71    0.13 
  -3 -10  -3    0.54    0.14 
  -3 -10  -3    0.24    0.17 
   3  10   3    0.67    0.17 
   3  10   3    0.32    0.15 
   3  10   3    0.74    0.16 
   3  10   3   -0.18    0.14 
   3  10   3    0.27    0.15 
   3  10   3    0.33    0.11 
  -4 -10  -3   13.02    0.23 
  -4 -10  -3   13.52    0.30 
   4  10   3   12.30    0.25 
   4  10   3   12.59    0.26 
   4  10   3   13.25    0.24 
  -5 -10  -3    0.90    0.18 
  -5 -10  -3    0.16    0.21 
   5  10   3    0.49    0.18 
   5  10   3   -0.09    0.19 
   5  10   3    0.35    0.22 
  -6 -10  -3    1.46    0.20 
   6  10   3    1.65    0.27 
   6  10   3    2.08    0.23 
   6  10   3    1.92    0.19 
   7  10   3    2.68    0.20 
   7  10   3    3.20    0.33 
   3 -11  -3    0.95    0.37 
   3 -11  -3    0.78    0.15 
  -3  11   3    0.76    0.25 
   2 -11  -3   14.91    0.28 
   2 -11  -3   14.27    0.43 
  -2  11   3   14.59    0.31 
   1 -11  -3    7.15    0.18 
   1 -11  -3    7.54    0.18 
  -1  11   3    7.78    0.22 
   0 -11  -3    0.10    0.13 
   0 -11  -3   -0.12    0.14 
   0  11   3   -0.20    0.16 
   0  11   3    0.35    0.10 
  -1 -11  -3    0.08    0.16 
  -1 -11  -3    0.14    0.13 
   1  11   3    0.29    0.19 
   1  11   3    0.06    0.13 
   1  11   3    0.15    0.14 
  -2 -11  -3    0.45    0.15 
  -2 -11  -3    0.33    0.17 
   2  11   3    0.52    0.13 
   2  11   3    0.55    0.16 
   2  11   3    0.41    0.18 
  -3 -11  -3    5.81    0.17 
  -3 -11  -3    5.94    0.22 
   3  11   3    5.94    0.20 
   3  11   3    5.75    0.14 
   3  11   3    5.80    0.19 
  -4 -11  -3    2.81    0.24 
  -4 -11  -3    2.82    0.19 
   4  11   3    2.62    0.22 
   4  11   3    3.01    0.21 
  -5 -11  -3    2.47    0.25 
  -5 -11  -3    1.90    0.21 
   5  11   3    2.61    0.23 
   5  11   3    1.75    0.22 
  -6 -11  -3    1.60    0.24 
   6  11   3    1.19    0.23 
   2 -12  -3    0.65    0.15 
   2 -12  -3    0.41    0.34 
  -2  12   3    0.47    0.23 
   1 -12  -3    1.25    0.16 
   1 -12  -3    1.02    0.16 
  -1  12   3    1.61    0.22 
   0 -12  -3    1.06    0.17 
   0 -12  -3    1.09    0.18 
   0  12   3    1.28    0.19 
  -1 -12  -3    5.77    0.24 
  -1 -12  -3    6.18    0.24 
   1  12   3    6.76    0.22 
   1  12   3    5.83    0.18 
   1  12   3    6.90    0.27 
  -2 -12  -3    1.47    0.21 
  -2 -12  -3    1.36    0.20 
   2  12   3    2.62    0.25 
   2  12   3    1.45    0.16 
   2  12   3    1.62    0.17 
  -3 -12  -3    0.05    0.25 
  -3 -12  -3   -0.12    0.22 
   3  12   3    0.15    0.20 
   3  12   3   -0.44    0.15 
   3  12   3    0.09    0.19 
  -4 -12  -3    1.49    0.28 
   4  12   3    1.51    0.23 
   4  12   3    2.25    0.23 
  -5 -12  -3    5.14    0.24 
   5  12   3    5.72    0.24 
   5  12   3    5.15    0.28 
   6  12   3    7.19    0.27 
   1 -13  -3    0.06    0.20 
  -1  13   3    0.54    0.22 
   0 -13  -3    0.64    0.18 
   0 -13  -3    0.67    0.17 
   0  13   3    0.43    0.21 
  -1 -13  -3    0.44    0.19 
  -1 -13  -3    0.83    0.22 
   1  13   3    1.10    0.19 
   1  13   3    1.31    0.24 
  -2 -13  -3   24.42    0.39 
  -2 -13  -3   24.45    0.37 
   2  13   3   24.40    0.35 
   2  13   3   25.40    0.43 
   2  13   3   25.14    0.34 
  -3 -13  -3    1.21    0.25 
   3  13   3    1.53    0.22 
   3  13   3    0.39    0.20 
   3  13   3    1.36    0.26 
  -4 -13  -3    0.16    0.20 
   4  13   3    0.07    0.22 
   4  13   3    0.28    0.25 
  -5 -13  -3    0.81    0.26 
   5  13   3    0.92    0.26 
   5  13   3    0.81    0.28 
  -1 -14  -3    1.89    0.22 
   1  14   3    2.08    0.20 
   1  14   3    2.83    0.29 
  -2 -14  -3    0.86    0.23 
  -2 -14  -3    0.38    0.19 
   2  14   3    0.69    0.25 
   2  14   3    0.45    0.20 
  -3 -14  -3    2.78    0.24 
  -3 -14  -3    3.11    0.26 
   3  14   3    3.16    0.24 
   3  14   3    3.92    0.27 
  -4 -14  -3   -0.05    0.24 
   4  14   3    0.46    0.24 
   4  14   3    0.88    0.32 
   3  13  -4    0.77    0.31 
  -3 -13   4    1.11    0.27 
   2  13  -4    1.27    0.34 
  -2 -13   4    0.05    0.23 
   5  12  -4    0.33    0.20 
   5  12  -4    0.24    0.31 
  -5 -12   4   -0.02    0.26 
  -5 -12   4    0.01    0.25 
   4  12  -4    5.77    0.31 
  -4 -12   4    5.48    0.27 
  -4 -12   4    5.96    0.27 
   3  12  -4    2.03    0.21 
   3  12  -4    2.98    0.32 
  -3 -12   4    3.57    0.33 
  -3 -12   4    2.17    0.23 
  -3 -12   4    2.13    0.25 
   2  12  -4    1.76    0.31 
  -2 -12   4    1.12    0.24 
  -2 -12   4    1.03    0.24 
   1  12  -4    3.18    0.32 
   1  12  -4    3.54    0.24 
  -1 -12   4    3.33    0.24 
  -1 -12   4    3.03    0.21 
   0  12  -4    1.60    0.31 
   0  12  -4    1.14    0.24 
   0 -12   4    0.53    0.18 
   6  11  -4    0.77    0.29 
   6  11  -4    2.00    0.23 
  -6 -11   4    2.05    0.28 
   5  11  -4    1.47    0.28 
   5  11  -4    1.52    0.20 
  -5 -11   4    1.40    0.31 
  -5 -11   4    0.85    0.28 
   4  11  -4    0.86    0.17 
   4  11  -4    0.46    0.27 
  -4 -11   4    0.73    0.27 
  -4 -11   4    0.82    0.25 
   3  11  -4    2.99    0.28 
  -3 -11   4    3.93    0.30 
  -3 -11   4    3.03    0.24 
  -3 -11   4    3.03    0.22 
   2  11  -4    1.36    0.17 
   2  11  -4    2.48    0.31 
  -2 -11   4    2.30    0.28 
  -2 -11   4    0.89    0.21 
  -2 -11   4    1.56    0.22 
   1  11  -4    3.34    0.23 
   1  11  -4    3.36    0.30 
  -1 -11   4    2.22    0.20 
  -1 -11   4    3.39    0.22 
  -1 -11   4    2.86    0.29 
   0  11  -4    4.62    0.29 
   0  11  -4    4.33    0.23 
   0 -11   4    3.92    0.20 
  -1  11  -4    0.82    0.28 
  -1  11  -4   -0.75    0.23 
   1 -11   4    0.09    0.16 
  -2  11  -4    1.80    0.26 
   2 -11   4    1.53    0.13 
   6  10  -4    6.29    0.27 
  -6 -10   4    6.35    0.30 
   5  10  -4    8.19    0.22 
   5  10  -4    7.64    0.29 
  -5 -10   4    7.61    0.25 
  -5 -10   4    7.88    0.30 
   4  10  -4    2.14    0.17 
   4  10  -4    1.92    0.27 
  -4 -10   4    2.08    0.20 
  -4 -10   4    2.40    0.23 
   3  10  -4    0.14    0.25 
  -3 -10   4    0.51    0.27 
  -3 -10   4   -0.07    0.19 
  -3 -10   4    0.18    0.17 
   2  10  -4    2.01    0.26 
   2  10  -4    1.77    0.16 
  -2 -10   4    1.57    0.17 
  -2 -10   4    1.84    0.26 
  -2 -10   4    1.83    0.21 
   1  10  -4    1.85    0.20 
   1  10  -4    2.61    0.27 
  -1 -10   4    1.74    0.21 
  -1 -10   4    1.32    0.25 
  -1 -10   4    1.94    0.18 
   0  10  -4   12.75    0.32 
   0  10  -4   10.95    0.22 
   0 -10   4   11.28    0.30 
   0 -10   4   11.06    0.22 
   0 -10   4   11.32    0.23 
  -1  10  -4    0.14    0.22 
  -1  10  -4    1.13    0.27 
   1 -10   4    0.26    0.15 
  -2  10  -4    0.60    0.23 
   2 -10   4    0.52    0.11 
  -3  10  -4    0.86    0.26 
   7   9  -4    0.93    0.22 
  -7  -9   4    0.60    0.33 
   6   9  -4    3.25    0.22 
  -6  -9   4    2.98    0.25 
   5   9  -4    7.51    0.26 
  -5  -9   4    6.40    0.28 
  -5  -9   4    6.76    0.28 
   4   9  -4    6.40    0.26 
   4   9  -4    6.48    0.23 
   4   9  -4    6.86    0.20 
  -4  -9   4    6.60    0.22 
  -4  -9   4    6.80    0.21 
   3   9  -4    0.56    0.13 
   3   9  -4    0.70    0.23 
   3   9  -4    0.71    0.13 
  -3  -9   4    0.54    0.17 
  -3  -9   4    0.89    0.25 
  -3  -9   4    0.83    0.17 
   2   9  -4    0.31    0.22 
   2   9  -4    0.11    0.12 
   2   9  -4    0.29    0.14 
  -2  -9   4    0.10    0.15 
  -2  -9   4    0.26    0.16 
  -2  -9   4    0.64    0.24 
  -2  -9   4    0.54    0.15 
   1   9  -4   -0.08    0.11 
   1   9  -4   -0.20    0.10 
   1   9  -4    0.62    0.22 
   1   9  -4   -0.13    0.09 
   1   9  -4    0.21    0.16 
  -1  -9   4   -0.20    0.14 
  -1  -9   4    0.15    0.14 
  -1  -9   4    0.28    0.22 
  -1  -9   4    0.10    0.14 
   0   9  -4    8.75    0.18 
   0   9  -4    8.32    0.09 
   0   9  -4    8.70    0.23 
   0  -9   4    8.81    0.15 
   0  -9   4    8.88    0.15 
   0  -9   4    8.95    0.13 
   0  -9   4    8.51    0.23 
  -1   9  -4    6.83    0.23 
  -1   9  -4    6.75    0.27 
   1  -9   4    5.56    0.25 
   1  -9   4    6.67    0.18 
   1  -9   4    6.51    0.19 
   1  -9   4    6.72    0.17 
  -2   9  -4    0.44    0.27 
  -2   9  -4   -0.12    0.20 
   2  -9   4   -0.32    0.22 
   2  -9   4   -0.01    0.10 
  -3   9  -4    1.08    0.23 
   7   8  -4    3.79    0.28 
   7   8  -4    4.02    0.26 
  -7  -8   4    3.49    0.24 
   6   8  -4    9.34    0.24 
   6   8  -4    8.15    0.26 
   6   8  -4    9.45    0.25 
  -6  -8   4    8.79    0.27 
  -6  -8   4    8.61    0.29 
   5   8  -4    6.05    0.18 
   5   8  -4    6.26    0.18 
   5   8  -4    6.09    0.21 
  -5  -8   4    6.26    0.23 
  -5  -8   4    6.14    0.22 
   4   8  -4    4.00    0.16 
   4   8  -4    3.56    0.19 
  -4  -8   4    3.89    0.19 
  -4  -8   4    3.77    0.14 
  -4  -8   4    4.19    0.18 
   3   8  -4    3.04    0.15 
   3   8  -4    2.38    0.22 
   3   8  -4    2.43    0.16 
  -3  -8   4    3.04    0.16 
  -3  -8   4    2.98    0.17 
  -3  -8   4    3.10    0.15 
  -3  -8   4    3.06    0.23 
   2   8  -4   10.55    0.15 
   2   8  -4   10.38    0.17 
   2   8  -4    9.96    0.22 
   2   8  -4   11.34    0.16 
  -2  -8   4   10.34    0.17 
  -2  -8   4   10.85    0.19 
  -2  -8   4   11.28    0.25 
  -2  -8   4   10.62    0.16 
   1   8  -4    1.17    0.11 
   1   8  -4    1.08    0.15 
   1   8  -4    1.66    0.19 
   1   8  -4    1.29    0.13 
   1   8  -4    0.65    0.10 
   1   8  -4    1.05    0.09 
  -1  -8   4    1.33    0.13 
  -1  -8   4    0.72    0.12 
  -1  -8   4    1.33    0.21 
  -1  -8   4    1.38    0.11 
   0   8  -4   25.46    0.43 
   0   8  -4   27.57    0.48 
   0   8  -4   26.13    0.46 
   0   8  -4   25.82    0.40 
   0  -8   4   27.74    0.43 
   0  -8   4   28.25    0.44 
   0  -8   4   27.50    0.49 
  -1   8  -4    0.70    0.18 
  -1   8  -4    0.43    0.21 
   1  -8   4    0.41    0.11 
   1  -8   4    0.22    0.07 
   1  -8   4    0.25    0.12 
   1  -8   4   -0.54    0.18 
   1  -8   4    0.32    0.11 
   1  -8   4    0.69    0.14 
  -2   8  -4    7.78    0.25 
  -2   8  -4    8.36    0.22 
  -2   8  -4    7.70    0.22 
   2  -8   4    7.35    0.23 
   2  -8   4    7.73    0.20 
   2  -8   4    7.25    0.12 
  -3   8  -4    0.61    0.21 
  -3   8  -4    0.41    0.21 
   3  -8   4    0.87    0.25 
   3  -8   4    0.72    0.21 
  -4   8  -4    0.88    0.26 
  -4   8  -4    0.37    0.24 
   4  -8   4    0.55    0.34 
   4  -8   4    0.89    0.26 
   4  -8   4    1.59    0.31 
   8   7  -4    5.02    0.26 
  -8  -7   4    4.18    0.29 
   7   7  -4    6.26    0.26 
   7   7  -4    6.92    0.33 
  -7  -7   4    7.29    0.31 
   6   7  -4    0.93    0.23 
   6   7  -4    1.03    0.19 
  -6  -7   4    0.54    0.23 
  -6  -7   4    1.00    0.20 
   5   7  -4   17.23    0.29 
   5   7  -4   17.77    0.29 
  -5  -7   4   15.62    0.24 
  -5  -7   4   16.98    0.29 
  -5  -7   4   17.27    0.29 
   4   7  -4   16.03    0.20 
   4   7  -4   16.15    0.18 
  -4  -7   4   15.80    0.18 
  -4  -7   4   16.22    0.25 
  -4  -7   4   15.99    0.18 
  -4  -7   4   15.62    0.15 
   3   7  -4    4.06    0.15 
   3   7  -4    4.26    0.17 
  -3  -7   4    3.76    0.22 
  -3  -7   4    3.88    0.15 
  -3  -7   4    3.78    0.15 
  -3  -7   4    4.12    0.16 
   2   7  -4   11.10    0.13 
   2   7  -4   12.07    0.15 
   2   7  -4   11.72    0.21 
   2   7  -4   10.31    0.18 
   2   7  -4   10.80    0.14 
  -2  -7   4   11.23    0.16 
  -2  -7   4   11.40    0.16 
  -2  -7   4   11.12    0.14 
  -2  -7   4   11.26    0.21 
   1   7  -4    1.42    0.09 
   1   7  -4    1.87    0.17 
   1   7  -4    1.53    0.13 
   1   7  -4    1.34    0.13 
   1   7  -4    1.21    0.10 
  -1  -7   4    1.48    0.11 
  -1  -7   4    1.69    0.12 
  -1  -7   4    1.40    0.12 
  -1  -7   4    1.72    0.19 
   0   7  -4    3.58    0.14 
   0   7  -4    3.80    0.13 
   0   7  -4    3.57    0.16 
   0   7  -4    3.35    0.07 
   0  -7   4    3.35    0.06 
   0  -7   4    3.51    0.10 
   0  -7   4    3.24    0.10 
   0  -7   4    3.31    0.15 
   0  -7   4    3.33    0.09 
  -1   7  -4   11.59    0.23 
  -1   7  -4   12.96    0.31 
  -1   7  -4   11.76    0.24 
   1  -7   4   12.06    0.21 
   1  -7   4   12.40    0.28 
   1  -7   4   11.56    0.22 
   1  -7   4   11.70    0.21 
   1  -7   4   10.81    0.26 
   1  -7   4   11.15    0.19 
  -2   7  -4    7.93    0.18 
  -2   7  -4    8.66    0.24 
  -2   7  -4    8.34    0.18 
   2  -7   4    8.10    0.12 
   2  -7   4    8.47    0.19 
   2  -7   4    8.15    0.09 
   2  -7   4    8.16    0.11 
   2  -7   4    8.07    0.22 
   2  -7   4    7.82    0.10 
  -3   7  -4    5.61    0.21 
  -3   7  -4    5.99    0.22 
   3  -7   4    5.97    0.25 
  -4   7  -4    0.24    0.18 
  -4   7  -4    0.40    0.23 
   4  -7   4    0.27    0.30 
   4  -7   4    1.00    0.28 
  -5   7  -4    3.49    0.26 
  -5   7  -4    3.36    0.27 
   5  -7   4    4.58    0.37 
   5  -7   4    3.20    0.35 
   8   6  -4   -0.90    0.37 
   8   6  -4    0.63    0.23 
   8   6  -4    0.50    0.30 
  -8  -6   4    0.39    0.26 
   7   6  -4    1.52    0.36 
   7   6  -4    2.60    0.29 
   7   6  -4    2.10    0.24 
  -7  -6   4    2.03    0.26 
   6   6  -4    2.64    0.21 
   6   6  -4    2.70    0.23 
  -6  -6   4    2.10    0.23 
  -6  -6   4    2.33    0.25 
   5   6  -4    1.13    0.16 
   5   6  -4    0.81    0.16 
   5   6  -4    0.75    0.18 
  -5  -6   4    1.06    0.15 
  -5  -6   4    0.92    0.19 
  -5  -6   4    0.95    0.15 
   4   6  -4    1.00    0.14 
   4   6  -4    1.57    0.16 
   4   6  -4    1.36    0.13 
  -4  -6   4    1.06    0.14 
  -4  -6   4    1.38    0.16 
  -4  -6   4    1.21    0.11 
   3   6  -4    0.64    0.13 
   3   6  -4    0.83    0.11 
   3   6  -4    0.75    0.11 
  -3  -6   4    0.98    0.10 
  -3  -6   4    0.86    0.11 
  -3  -6   4    0.44    0.12 
  -3  -6   4    1.32    0.18 
   2   6  -4    2.03    0.15 
   2   6  -4    1.48    0.07 
   2   6  -4    1.38    0.13 
   2   6  -4    2.11    0.10 
   2   6  -4    1.66    0.09 
   2   6  -4    1.75    0.10 
  -2  -6   4    2.35    0.10 
  -2  -6   4    2.07    0.11 
  -2  -6   4    1.82    0.11 
  -2  -6   4    2.04    0.16 
   1   6  -4   32.70    0.43 
   1   6  -4   33.66    0.42 
   1   6  -4   33.60    0.42 
   1   6  -4   31.77    0.45 
   1   6  -4   32.79    0.42 
   1   6  -4   33.16    0.46 
  -1  -6   4   33.46    0.43 
  -1  -6   4   33.29    0.47 
  -1  -6   4   33.39    0.42 
  -1  -6   4   32.75    0.41 
  -1  -6   4   32.59    0.42 
   0   6  -4   11.86    0.25 
   0   6  -4   10.85    0.24 
   0   6  -4   12.43    0.27 
   0   6  -4   11.65    0.30 
   0   6  -4   11.62    0.30 
   0  -6   4   11.94    0.24 
   0  -6   4   12.10    0.24 
   0  -6   4   11.68    0.25 
   0  -6   4   12.56    0.25 
   0  -6   4   11.94    0.31 
   0  -6   4   11.12    0.26 
  -1   6  -4    0.55    0.15 
  -1   6  -4    0.22    0.13 
  -1   6  -4    0.80    0.13 
   1  -6   4    0.15    0.15 
   1  -6   4    0.56    0.06 
   1  -6   4    0.09    0.11 
   1  -6   4    0.74    0.09 
   1  -6   4    0.72    0.09 
   1  -6   4    1.04    0.09 
  -2   6  -4    1.16    0.18 
  -2   6  -4    0.27    0.14 
  -2   6  -4    0.56    0.15 
   2  -6   4    0.63    0.07 
   2  -6   4    0.84    0.14 
   2  -6   4    0.95    0.07 
   2  -6   4    0.62    0.17 
   2  -6   4    0.71    0.04 
   2  -6   4    0.59    0.06 
  -3   6  -4    1.41    0.19 
  -3   6  -4    1.40    0.16 
   3  -6   4    1.40    0.20 
   3  -6   4    1.66    0.19 
  -4   6  -4   11.88    0.29 
  -4   6  -4   12.51    0.27 
   4  -6   4   12.48    0.37 
   4  -6   4   14.31    0.38 
  -5   6  -4    1.07    0.26 
  -5   6  -4    1.40    0.24 
   5  -6   4    2.38    0.32 
   5  -6   4    1.05    0.34 
   8   5  -4   -0.17    0.22 
  -8  -5   4   -0.17    0.23 
   7   5  -4   -0.30    0.24 
   7   5  -4   -0.10    0.19 
   7   5  -4   -1.07    0.31 
  -7  -5   4   -0.15    0.20 
   6   5  -4    1.62    0.20 
   6   5  -4    1.58    0.29 
   6   5  -4    1.98    0.19 
  -6  -5   4    1.95    0.19 
  -6  -5   4    1.74    0.23 
   5   5  -4   17.87    0.22 
   5   5  -4   17.45    0.29 
   5   5  -4   18.01    0.22 
   5   5  -4   17.97    0.20 
  -5  -5   4   18.95    0.22 
  -5  -5   4   18.30    0.25 
   4   5  -4   22.44    0.26 
   4   5  -4   23.28    0.27 
   4   5  -4   23.36    0.27 
  -4  -5   4   22.51    0.27 
  -4  -5   4   23.34    0.27 
  -4  -5   4   22.60    0.26 
   3   5  -4    2.64    0.20 
   3   5  -4    3.01    0.16 
   3   5  -4    2.89    0.15 
   3   5  -4    3.02    0.16 
   3   5  -4    3.78    0.18 
  -3  -5   4    3.34    0.17 
  -3  -5   4    3.43    0.21 
  -3  -5   4    3.13    0.15 
  -3  -5   4    3.55    0.17 
   2   5  -4   15.77    0.18 
   2   5  -4   16.50    0.20 
   2   5  -4   15.19    0.20 
   2   5  -4   15.93    0.19 
  -2  -5   4   16.00    0.18 
  -2  -5   4   15.28    0.16 
  -2  -5   4   16.16    0.25 
  -2  -5   4   14.89    0.22 
  -2  -5   4   16.13    0.17 
  -2  -5   4   14.57    0.16 
   1   5  -4   21.14    0.27 
   1   5  -4   21.81    0.32 
   1   5  -4   21.14    0.27 
   1   5  -4   22.15    0.28 
   1   5  -4   21.17    0.27 
   1   5  -4   20.55    0.31 
  -1  -5   4   20.61    0.26 
  -1  -5   4   22.31    0.27 
  -1  -5   4   21.58    0.27 
  -1  -5   4   21.64    0.27 
  -1  -5   4   22.13    0.33 
   0   5  -4   89.70    0.96 
   0   5  -4   90.29    0.97 
   0   5  -4   89.64    1.00 
   0   5  -4   88.54    0.98 
   0   5  -4   89.77    0.97 
   0   5  -4   88.89    0.99 
   0  -5   4   90.72    0.97 
   0  -5   4   88.90    0.97 
   0  -5   4   88.38    0.97 
   0  -5   4   91.06    1.00 
   0  -5   4   90.07    0.98 
   0  -5   4   90.29    0.97 
  -1   5  -4   44.35    0.44 
  -1   5  -4   43.94    0.46 
  -1   5  -4   44.04    0.44 
   1  -5   4   43.85    0.42 
   1  -5   4   43.92    0.48 
   1  -5   4   44.75    0.45 
   1  -5   4   43.99    0.41 
   1  -5   4   43.85    0.41 
   1  -5   4   44.41    0.42 
   1  -5   4   42.97    0.46 
  -2   5  -4    5.89    0.15 
  -2   5  -4    6.05    0.15 
  -2   5  -4    5.59    0.18 
   2  -5   4    5.90    0.09 
   2  -5   4    5.88    0.07 
   2  -5   4    5.80    0.18 
   2  -5   4    6.09    0.15 
  -3   5  -4    3.63    0.16 
  -3   5  -4    3.76    0.17 
   3  -5   4    4.12    0.20 
   3  -5   4    3.69    0.16 
  -4   5  -4    0.19    0.20 
  -4   5  -4    0.75    0.18 
   4  -5   4   -0.02    0.22 
   4  -5   4   -0.24    0.24 
   4  -5   4    0.20    0.24 
  -5   5  -4    8.39    0.28 
  -5   5  -4    8.89    0.25 
   5  -5   4    9.12    0.35 
   5  -5   4    8.05    0.34 
  -6   5  -4    0.32    0.22 
  -6   5  -4    0.64    0.31 
   6  -5   4    0.87    0.34 
   6  -5   4    1.15    0.33 
   8   4  -4    1.78    0.25 
  -8  -4   4    1.19    0.24 
   7   4  -4    2.03    0.24 
   7   4  -4    2.06    0.34 
   7   4  -4    3.26    0.21 
  -7  -4   4    2.64    0.19 
   6   4  -4    0.44    0.16 
   6   4  -4   -0.52    0.27 
   6   4  -4   -0.45    0.18 
  -6  -4   4    0.09    0.20 
  -6  -4   4    0.02    0.16 
  -6  -4   4   -0.13    0.09 
   5   4  -4    0.16    0.15 
   5   4  -4    0.16    0.14 
   5   4  -4    0.22    0.22 
   5   4  -4    0.38    0.12 
  -5  -4   4    0.29    0.14 
  -5  -4   4    0.34    0.07 
  -5  -4   4    0.40    0.12 
   4   4  -4    5.78    0.13 
   4   4  -4    5.13    0.20 
   4   4  -4    5.47    0.13 
   4   4  -4    5.84    0.13 
  -4  -4   4    6.03    0.14 
  -4  -4   4    5.59    0.12 
  -4  -4   4    5.65    0.14 
   3   4  -4   55.04    0.67 
   3   4  -4   55.86    0.60 
   3   4  -4   56.52    0.60 
   3   4  -4   55.94    0.59 
   3   4  -4   54.89    0.59 
   3   4  -4   55.32    0.62 
  -3  -4   4   55.17    0.62 
  -3  -4   4   55.82    0.59 
  -3  -4   4   55.32    0.59 
  -3  -4   4   53.96    0.65 
  -3  -4   4   55.72    0.59 
  -3  -4   4   54.22    0.58 
   2   4  -4   11.74    0.26 
   2   4  -4   11.27    0.25 
   2   4  -4   12.42    0.27 
   2   4  -4   12.44    0.25 
   2   4  -4   12.82    0.32 
   2   4  -4   11.96    0.25 
  -2  -4   4   12.57    0.31 
  -2  -4   4   12.21    0.26 
  -2  -4   4   12.38    0.26 
  -2  -4   4   12.22    0.26 
  -2  -4   4   11.11    0.24 
  -2  -4   4   12.06    0.35 
   1   4  -4   70.33    0.64 
   1   4  -4   70.81    0.64 
   1   4  -4   70.53    0.67 
   1   4  -4   69.46    0.65 
   1   4  -4   70.16    0.64 
   1   4  -4   69.64    0.64 
  -1  -4   4   69.99    0.63 
  -1  -4   4   70.65    0.67 
  -1  -4   4   69.76    0.64 
  -1  -4   4   69.78    0.64 
  -1  -4   4   69.73    0.64 
   0   4  -4    1.16    0.14 
   0   4  -4    1.18    0.11 
   0   4  -4    1.46    0.10 
   0   4  -4    1.23    0.15 
   0   4  -4    1.28    0.12 
   0   4  -4    1.73    0.11 
   0  -4   4    1.24    0.15 
   0  -4   4    1.38    0.11 
   0  -4   4    1.38    0.10 
   0  -4   4    1.27    0.10 
   0  -4   4    1.06    0.09 
   0  -4   4    1.50    0.10 
  -1   4  -4   81.61    0.74 
  -1   4  -4   84.12    0.76 
  -1   4  -4   83.40    0.74 
   1  -4   4   84.28    0.78 
   1  -4   4   83.73    0.73 
   1  -4   4   83.43    0.75 
   1  -4   4   83.63    0.73 
   1  -4   4   83.97    0.73 
   1  -4   4   84.35    0.73 
   1  -4   4   84.56    0.76 
  -2   4  -4   29.94    0.32 
  -2   4  -4   29.99    0.31 
  -2   4  -4   30.34    0.34 
   2  -4   4   29.75    0.36 
   2  -4   4   29.21    0.31 
   2  -4   4   31.18    0.34 
  -3   4  -4    5.17    0.21 
  -3   4  -4    4.85    0.22 
   3  -4   4    5.66    0.27 
   3  -4   4    4.68    0.25 
  -4   4  -4    5.64    0.17 
  -4   4  -4    5.96    0.16 
   4  -4   4    5.60    0.21 
   4  -4   4    5.23    0.22 
  -5   4  -4    2.59    0.22 
  -5   4  -4    2.85    0.18 
   5  -4   4    2.76    0.26 
   5  -4   4    3.14    0.28 
  -6   4  -4    1.03    0.24 
  -6   4  -4    1.37    0.20 
   6  -4   4    1.68    0.32 
   8   3  -4    0.65    0.23 
  -8  -3   4    1.15    0.17 
  -8  -3   4    0.66    0.23 
   7   3  -4   -0.37    0.16 
   7   3  -4   -0.52    0.22 
   7   3  -4   -1.29    0.31 
  -7  -3   4   -0.22    0.13 
  -7  -3   4   -0.37    0.17 
   6   3  -4    6.70    0.22 
   6   3  -4    6.42    0.20 
   6   3  -4    6.05    0.30 
  -6  -3   4    6.26    0.14 
  -6  -3   4    6.53    0.21 
  -6  -3   4    6.66    0.19 
   5   3  -4    1.67    0.16 
   5   3  -4    1.29    0.14 
   5   3  -4    1.23    0.21 
   5   3  -4    1.08    0.13 
  -5  -3   4    1.14    0.08 
  -5  -3   4    1.36    0.13 
  -5  -3   4    1.12    0.15 
   4   3  -4    1.15    0.12 
   4   3  -4    0.71    0.12 
   4   3  -4    1.11    0.12 
   4   3  -4    0.81    0.17 
  -4  -3   4    0.81    0.10 
  -4  -3   4    1.18    0.12 
  -4  -3   4    1.05    0.09 
  -4  -3   4    0.87    0.12 
   3   3  -4  103.27    1.04 
   3   3  -4  102.78    1.04 
   3   3  -4  102.40    1.04 
   3   3  -4  101.47    1.09 
   3   3  -4  102.75    1.04 
   3   3  -4  102.85    1.07 
  -3  -3   4  100.40    1.08 
  -3  -3   4  102.89    1.04 
  -3  -3   4  102.55    1.04 
  -3  -3   4  101.07    1.04 
  -3  -3   4  102.42    1.07 
  -3  -3   4  102.39    1.04 
   2   3  -4  164.26    1.80 
   2   3  -4  163.65    1.79 
   2   3  -4  164.96    1.82 
   2   3  -4  164.92    1.84 
   2   3  -4  163.88    1.80 
   2   3  -4  164.68    1.79 
  -2  -3   4  162.21    1.79 
  -2  -3   4  163.49    1.81 
  -2  -3   4  163.64    1.83 
  -2  -3   4  161.94    1.79 
  -2  -3   4  164.00    1.80 
  -2  -3   4  163.58    1.79 
   1   3  -4  119.45    1.39 
   1   3  -4  120.59    1.39 
   1   3  -4  120.29    1.39 
   1   3  -4  122.22    1.41 
   1   3  -4  119.70    1.38 
   1   3  -4  117.35    1.39 
  -1  -3   4  119.28    1.39 
  -1  -3   4  121.06    1.42 
  -1  -3   4  120.33    1.39 
  -1  -3   4  120.82    1.41 
  -1  -3   4  120.97    1.39 
  -1  -3   4  116.69    1.39 
   0   3  -4   15.25    0.19 
   0   3  -4   15.57    0.17 
   0   3  -4   15.28    0.23 
   0   3  -4   16.03    0.19 
   0   3  -4   16.09    0.17 
   0   3  -4   16.31    0.16 
   0  -3   4   16.34    0.17 
   0  -3   4   16.24    0.17 
   0  -3   4   15.68    0.24 
   0  -3   4   15.57    0.17 
   0  -3   4   15.61    0.17 
  -1   3  -4    6.12    0.14 
  -1   3  -4    6.79    0.15 
  -1   3  -4    6.57    0.15 
   1  -3   4    6.32    0.17 
   1  -3   4    6.30    0.11 
   1  -3   4    6.95    0.17 
   1  -3   4    6.60    0.15 
   1  -3   4    6.12    0.10 
   1  -3   4    6.42    0.12 
   1  -3   4    6.12    0.12 
  -2   3  -4   18.66    0.18 
  -2   3  -4   19.66    0.19 
  -2   3  -4   19.77    0.18 
   2  -3   4   19.41    0.18 
   2  -3   4   18.53    0.20 
   2  -3   4   18.69    0.22 
  -3   3  -4    5.31    0.19 
  -3   3  -4    5.36    0.17 
   3  -3   4    5.42    0.22 
   3  -3   4    6.29    0.25 
   3  -3   4    5.11    0.16 
  -4   3  -4    1.56    0.14 
  -4   3  -4    1.06    0.16 
   4  -3   4    1.30    0.18 
   4  -3   4    0.74    0.19 
  -5   3  -4    0.05    0.19 
  -5   3  -4    0.49    0.16 
   5  -3   4    0.04    0.23 
   5  -3   4    0.32    0.25 
  -6   3  -4    3.25    0.19 
  -6   3  -4    2.98    0.23 
   6  -3   4    2.20    0.26 
  -7   3  -4    0.06    0.26 
  -7   3  -4    0.80    0.20 
   8   2  -4    0.03    0.29 
   8   2  -4   -0.13    0.20 
  -8  -2   4   -0.25    0.16 
   7   2  -4    4.34    0.24 
   7   2  -4    3.32    0.33 
   7   2  -4    4.90    0.21 
  -7  -2   4    4.35    0.18 
  -7  -2   4    3.99    0.13 
   6   2  -4    4.82    0.29 
   6   2  -4    5.82    0.19 
   6   2  -4    5.16    0.19 
  -6  -2   4    4.42    0.13 
  -6  -2   4    5.38    0.14 
  -6  -2   4    5.81    0.18 
   5   2  -4   15.68    0.30 
   5   2  -4   16.40    0.31 
   5   2  -4   15.79    0.45 
   5   2  -4   15.87    0.31 
  -5  -2   4   16.28    0.29 
  -5  -2   4   15.81    0.28 
  -5  -2   4   15.05    0.26 
  -5  -2   4   15.47    0.31 
   4   2  -4   15.74    0.23 
   4   2  -4   16.22    0.24 
   4   2  -4   15.47    0.24 
  -4  -2   4   15.92    0.23 
  -4  -2   4   15.33    0.23 
  -4  -2   4   15.72    0.24 
  -4  -2   4   15.34    0.22 
   3   2  -4   14.01    0.25 
   3   2  -4   13.65    0.25 
   3   2  -4   13.28    0.24 
   3   2  -4   13.85    0.29 
   3   2  -4   14.17    0.25 
   3   2  -4   15.00    0.35 
  -3  -2   4   13.14    0.25 
  -3  -2   4   13.71    0.30 
  -3  -2   4   13.41    0.32 
  -3  -2   4   13.53    0.24 
  -3  -2   4   13.71    0.24 
  -3  -2   4   13.66    0.24 
   2   2  -4  244.60    2.51 
   2   2  -4  241.81    2.49 
   2   2  -4  246.50    2.49 
   2   2  -4  242.94    2.49 
   2   2  -4  240.56    2.52 
   2   2  -4  242.82    2.50 
  -2  -2   4  240.22    2.49 
  -2  -2   4  244.13    2.49 
  -2  -2   4  245.57    2.49 
  -2  -2   4  241.45    2.51 
  -2  -2   4  243.28    2.49 
  -2  -2   4  242.40    2.52 
   1   2  -4  146.07    1.37 
   1   2  -4  145.69    1.38 
   1   2  -4  148.44    1.36 
   1   2  -4  147.51    1.39 
   1   2  -4  147.13    1.38 
   1   2  -4  147.98    1.37 
  -1  -2   4  145.55    1.37 
  -1  -2   4  146.87    1.37 
  -1  -2   4  147.25    1.40 
  -1  -2   4  148.50    1.38 
  -1  -2   4  146.75    1.39 
  -1  -2   4  145.44    1.37 
   0   2  -4   38.46    0.67 
   0   2  -4   39.00    0.68 
   0   2  -4   38.21    0.66 
   0   2  -4   39.74    0.65 
   0   2  -4   38.46    0.65 
   0   2  -4   38.90    0.65 
   0   2  -4   38.80    0.65 
   0   2  -4   39.03    0.65 
   0  -2   4   38.67    0.65 
   0  -2   4   38.31    0.65 
   0  -2   4   39.06    0.68 
   0  -2   4   37.99    0.65 
   0  -2   4   39.36    0.66 
   0  -2   4   37.39    0.66 
  -1   2  -4   52.34    0.51 
  -1   2  -4   51.97    0.52 
  -1   2  -4   51.25    0.53 
  -1   2  -4   51.06    0.50 
  -1   2  -4   50.75    0.52 
   1  -2   4   51.28    0.54 
   1  -2   4   51.60    0.52 
   1  -2   4   51.77    0.51 
   1  -2   4   51.40    0.55 
   1  -2   4   51.26    0.51 
   1  -2   4   51.61    0.51 
  -2   2  -4   14.91    0.19 
  -2   2  -4   15.07    0.20 
  -2   2  -4   15.34    0.22 
   2  -2   4   15.27    0.16 
   2  -2   4   15.17    0.16 
   2  -2   4   15.03    0.19 
   2  -2   4   14.90    0.24 
  -3   2  -4   18.34    0.12 
  -3   2  -4   17.82    0.13 
   3  -2   4   18.53    0.15 
   3  -2   4   18.44    0.15 
   3  -2   4   18.69    0.08 
   3  -2   4   18.40    0.12 
  -4   2  -4   15.08    0.22 
  -4   2  -4   15.68    0.20 
   4  -2   4   15.59    0.16 
   4  -2   4   15.25    0.16 
   4  -2   4   15.32    0.25 
   4  -2   4   15.93    0.18 
   4  -2   4   15.98    0.17 
   4  -2   4   16.63    0.33 
  -5   2  -4    3.46    0.14 
  -5   2  -4    3.45    0.18 
   5  -2   4    3.37    0.09 
   5  -2   4    3.38    0.09 
   5  -2   4    3.19    0.21 
   5  -2   4    3.09    0.24 
   5  -2   4    3.57    0.11 
   5  -2   4    3.42    0.07 
  -6   2  -4    0.52    0.17 
  -6   2  -4    0.36    0.20 
   6  -2   4    0.17    0.13 
   6  -2   4    0.58    0.25 
  -7   2  -4    0.95    0.19 
  -7   2  -4    1.08    0.24 
   7  -2   4    0.72    0.33 
   7  -2   4    0.74    0.15 
   8   1  -4    0.87    0.31 
   8   1  -4    0.12    0.20 
  -8  -1   4   -0.07    0.16 
  -8  -1   4    0.43    0.16 
   7   1  -4   -0.10    0.23 
   7   1  -4    0.11    0.17 
  -7  -1   4    0.00    0.15 
  -7  -1   4   -0.20    0.14 
  -7  -1   4    0.50    0.16 
   6   1  -4    6.84    0.17 
   6   1  -4    7.32    0.30 
   6   1  -4    6.75    0.19 
  -6  -1   4    7.50    0.17 
  -6  -1   4    7.17    0.15 
  -6  -1   4    7.21    0.14 
   5   1  -4   25.66    0.39 
   5   1  -4   26.28    0.40 
   5   1  -4   26.99    0.39 
   5   1  -4   26.29    0.51 
  -5  -1   4   26.04    0.36 
  -5  -1   4   27.30    0.38 
  -5  -1   4   26.51    0.37 
   4   1  -4   44.29    0.58 
   4   1  -4   44.43    0.57 
   4   1  -4   42.73    0.58 
   4   1  -4   41.45    0.68 
   4   1  -4   43.29    0.66 
   4   1  -4   41.83    0.58 
  -4  -1   4   43.83    0.57 
  -4  -1   4   42.99    0.58 
  -4  -1   4   43.12    0.57 
  -4  -1   4   42.31    0.57 
   3   1  -4  192.79    1.54 
   3   1  -4  190.76    1.54 
   3   1  -4  190.40    1.54 
   3   1  -4  191.16    1.56 
   3   1  -4  189.69    1.58 
   3   1  -4  191.15    1.54 
  -3  -1   4  191.03    1.54 
  -3  -1   4  190.31    1.54 
  -3  -1   4  191.18    1.54 
  -3  -1   4  190.33    1.54 
  -3  -1   4  189.32    1.58 
   2   1  -4   19.61    0.30 
   2   1  -4   21.11    0.38 
   2   1  -4   20.93    0.34 
   2   1  -4   19.67    0.30 
   2   1  -4   20.60    0.31 
   2   1  -4   19.97    0.30 
  -2  -1   4   20.76    0.34 
  -2  -1   4   20.64    0.31 
  -2  -1   4   20.20    0.35 
  -2  -1   4   19.55    0.30 
  -2  -1   4   20.10    0.30 
  -2  -1   4   20.83    0.31 
   1   1  -4   25.03    0.42 
   1   1  -4   24.86    0.40 
   1   1  -4   25.00    0.42 
   1   1  -4   25.17    0.45 
   1   1  -4   24.32    0.40 
   1   1  -4   25.21    0.40 
  -1  -1   4   24.47    0.40 
  -1  -1   4   25.24    0.40 
  -1  -1   4   25.09    0.43 
  -1  -1   4   24.92    0.42 
  -1  -1   4   25.45    0.40 
  -1  -1   4   23.79    0.40 
   0   1  -4    3.68    0.07 
   0   1  -4    3.23    0.06 
   0   1  -4    3.42    0.07 
   0   1  -4    3.30    0.10 
   0   1  -4    3.03    0.05 
   0  -1   4    3.21    0.06 
   0  -1   4    3.01    0.05 
   0  -1   4    3.17    0.06 
   0  -1   4    3.38    0.09 
   0  -1   4    3.32    0.10 
  -1   1  -4   19.65    0.40 
  -1   1  -4   20.01    0.36 
  -1   1  -4   21.29    0.38 
  -1   1  -4   19.46    0.36 
  -1   1  -4   20.21    0.38 
  -1   1  -4   21.12    0.38 
   1  -1   4   20.32    0.40 
   1  -1   4   20.90    0.36 
   1  -1   4   21.26    0.37 
   1  -1   4   19.39    0.40 
   1  -1   4   19.73    0.36 
   1  -1   4   20.13    0.37 
   1  -1   4   19.78    0.37 
  -2   1  -4   24.93    0.41 
  -2   1  -4   24.51    0.40 
   2  -1   4   24.17    0.39 
   2  -1   4   25.77    0.41 
   2  -1   4   25.31    0.39 
   2  -1   4   26.01    0.45 
   2  -1   4   25.61    0.40 
  -3   1  -4   53.26    0.68 
  -3   1  -4   55.33    0.67 
   3  -1   4   54.19    0.66 
   3  -1   4   54.25    0.66 
   3  -1   4   54.37    0.66 
   3  -1   4   54.64    0.67 
   3  -1   4   55.64    0.71 
   3  -1   4   54.52    0.66 
   3  -1   4   55.89    0.72 
  -4   1  -4   13.80    0.22 
  -4   1  -4   14.39    0.21 
   4  -1   4   14.96    0.19 
   4  -1   4   14.10    0.18 
   4  -1   4   15.40    0.20 
   4  -1   4   14.02    0.18 
   4  -1   4   15.44    0.23 
   4  -1   4   14.86    0.30 
   4  -1   4   15.71    0.32 
  -5   1  -4    1.23    0.18 
  -5   1  -4    1.38    0.14 
   5  -1   4    0.76    0.19 
   5  -1   4    1.07    0.09 
   5  -1   4    0.95    0.22 
   5  -1   4    1.28    0.12 
   5  -1   4    1.12    0.09 
   5  -1   4    1.12    0.11 
  -6   1  -4    0.78    0.15 
  -6   1  -4    0.88    0.22 
   6  -1   4    0.62    0.25 
   6  -1   4    0.13    0.13 
   6  -1   4    0.40    0.27 
   6  -1   4    0.11    0.15 
  -7   1  -4    0.28    0.17 
  -7   1  -4    0.05    0.22 
   7  -1   4    0.48    0.30 
   8   0  -4    1.36    0.40 
   8   0  -4    2.89    0.31 
   8   0  -4    2.68    0.23 
  -8   0   4    2.62    0.20 
   7   0  -4    2.59    0.19 
   7   0  -4    1.83    0.35 
   7   0  -4    2.86    0.25 
  -7   0   4    2.37    0.16 
  -7   0   4    2.86    0.18 
   6   0  -4   -0.72    0.17 
   6   0  -4   -0.25    0.13 
   6   0  -4   -0.42    0.27 
  -6   0   4   -0.16    0.13 
  -6   0   4   -0.18    0.12 
   5   0  -4    7.84    0.15 
   5   0  -4    7.95    0.24 
   5   0  -4    7.59    0.14 
   5   0  -4    8.69    0.16 
  -5   0   4    7.76    0.15 
  -5   0   4    8.32    0.14 
  -5   0   4    8.21    0.13 
  -5   0   4    8.51    0.14 
   4   0  -4   75.35    0.84 
   4   0  -4   76.92    0.85 
   4   0  -4   75.38    0.84 
   4   0  -4   75.22    0.91 
   4   0  -4   76.12    0.84 
   4   0  -4   77.27    0.89 
  -4   0   4   75.83    0.84 
  -4   0   4   77.40    0.84 
   3   0  -4   12.31    0.16 
   3   0  -4   13.34    0.29 
   3   0  -4   12.66    0.17 
   3   0  -4   12.84    0.18 
   3   0  -4   12.83    0.21 
  -3   0   4   12.99    0.17 
  -3   0   4   12.05    0.20 
  -3   0   4   12.45    0.16 
  -3   0   4   12.08    0.16 
  -3   0   4   12.73    0.16 
   2   0  -4   29.66    0.28 
   2   0  -4   29.35    0.31 
   2   0  -4   29.22    0.35 
   2   0  -4   30.14    0.29 
   2   0  -4   29.16    0.28 
  -2   0   4   29.40    0.28 
  -2   0   4   29.89    0.28 
  -2   0   4   29.05    0.28 
  -2   0   4   29.07    0.33 
  -2   0   4   29.23    0.31 
  -2   0   4   29.36    0.28 
   1   0  -4   10.99    0.13 
   1   0  -4   10.62    0.14 
   1   0  -4   11.79    0.22 
   1   0  -4   10.56    0.13 
   1   0  -4   10.69    0.12 
   1   0  -4   10.41    0.12 
   1   0  -4   11.17    0.18 
  -1   0   4   11.02    0.13 
  -1   0   4   10.84    0.12 
  -1   0   4   10.84    0.15 
  -1   0   4   11.08    0.13 
  -1   0   4   11.12    0.17 
   0   0  -4   34.65    0.50 
   0   0  -4   34.53    0.52 
   0   0  -4   33.72    0.50 
   0   0  -4   35.72    0.52 
   0   0  -4   34.78    0.53 
   0   0  -4   34.36    0.50 
   0   0   4   33.83    0.50 
   0   0   4   34.03    0.50 
   0   0   4   34.83    0.53 
   0   0   4   34.49    0.50 
   0   0   4   35.65    0.52 
   0   0   4   34.18    0.53 
   0   0   4   34.13    0.50 
  -1   0  -4    6.41    0.18 
  -1   0  -4    6.34    0.13 
  -1   0  -4    6.11    0.12 
  -1   0  -4    6.07    0.12 
  -1   0  -4    6.21    0.13 
   1   0   4    6.31    0.15 
   1   0   4    6.46    0.12 
   1   0   4    6.64    0.13 
   1   0   4    6.38    0.19 
   1   0   4    6.44    0.12 
   1   0   4    6.12    0.12 
   1   0   4    6.06    0.13 
  -2   0  -4   53.53    0.80 
  -2   0  -4   56.17    0.81 
  -2   0  -4   54.34    0.81 
  -2   0  -4   54.07    0.80 
   2   0   4   54.66    0.80 
   2   0   4   52.39    0.80 
   2   0   4   53.97    0.80 
   2   0   4   54.38    0.84 
   2   0   4   56.08    0.82 
   2   0   4   53.74    0.80 
   2   0   4   53.41    0.80 
  -3   0  -4   28.03    0.27 
  -3   0  -4   28.09    0.26 
   3   0   4   27.37    0.26 
   3   0   4   28.55    0.26 
   3   0   4   27.53    0.26 
   3   0   4   28.78    0.31 
   3   0   4   29.45    0.35 
   3   0   4   28.04    0.27 
   3   0   4   28.23    0.26 
  -4   0  -4    4.51    0.08 
  -4   0  -4    3.80    0.13 
  -4   0  -4    4.03    0.10 
   4   0   4    4.52    0.17 
   4   0   4    3.84    0.08 
   4   0   4    4.29    0.10 
   4   0   4    4.82    0.12 
   4   0   4    4.67    0.11 
   4   0   4    4.22    0.09 
   4   0   4    3.62    0.15 
  -5   0  -4   11.97    0.16 
  -5   0  -4   12.06    0.14 
  -5   0  -4   11.71    0.19 
   5   0   4   12.20    0.18 
   5   0   4   12.14    0.24 
   5   0   4   11.65    0.14 
   5   0   4   12.07    0.27 
   5   0   4   12.19    0.16 
   5   0   4   12.15    0.15 
  -6   0  -4   11.34    0.25 
  -6   0  -4   10.09    0.30 
   6   0   4    9.81    0.26 
   6   0   4   12.36    0.29 
   6   0   4   10.73    0.42 
   6   0   4   11.68    0.41 
   6   0   4   11.23    0.27 
  -7   0  -4    5.31    0.18 
  -7   0  -4    5.03    0.24 
   7   0   4    5.42    0.34 
   7   0   4    5.34    0.20 
   7   0   4    4.31    0.29 
   7  -1  -4    5.24    0.20 
   7  -1  -4    5.51    0.38 
  -7   1   4    5.77    0.24 
  -7   1   4    6.11    0.20 
   6  -1  -4    0.71    0.27 
   6  -1  -4    1.45    0.18 
   6  -1  -4    1.66    0.14 
  -6   1   4    1.51    0.15 
  -6   1   4    1.48    0.11 
  -6   1   4    1.69    0.15 
   5  -1  -4    3.02    0.24 
   5  -1  -4    3.08    0.12 
   5  -1  -4    3.36    0.15 
  -5   1   4    3.14    0.09 
  -5   1   4    2.93    0.10 
  -5   1   4    3.44    0.13 
  -5   1   4    3.20    0.14 
   4  -1  -4    9.56    0.27 
   4  -1  -4   10.14    0.27 
   4  -1  -4    9.69    0.18 
   4  -1  -4    9.94    0.20 
   4  -1  -4    9.17    0.19 
  -4   1   4   10.01    0.18 
  -4   1   4    9.90    0.18 
  -4   1   4    8.87    0.18 
   3  -1  -4   60.13    0.81 
   3  -1  -4   60.74    0.88 
   3  -1  -4   59.46    0.82 
   3  -1  -4   60.68    0.82 
   3  -1  -4   60.65    0.84 
  -3   1   4   59.20    0.81 
  -3   1   4   60.20    0.81 
  -3   1   4   60.34    0.81 
  -3   1   4   59.90    0.86 
   2  -1  -4    5.60    0.15 
   2  -1  -4    5.84    0.11 
   2  -1  -4    5.81    0.12 
   2  -1  -4    5.97    0.10 
   2  -1  -4    5.52    0.10 
   2  -1  -4    5.47    0.10 
  -2   1   4    5.73    0.10 
  -2   1   4    5.55    0.13 
  -2   1   4    5.81    0.10 
  -2   1   4    5.74    0.12 
  -2   1   4    5.42    0.10 
  -2   1   4    5.38    0.09 
   1  -1  -4   12.36    0.53 
  -1   1   4   12.08    0.52 
  -1   1   4   12.27    0.51 
  -1   1   4   11.31    0.49 
  -1   1   4   12.96    0.49 
  -1   1   4   12.21    0.49 
   0  -1  -4   -0.23    0.07 
   0  -1  -4    0.12    0.08 
   0  -1  -4    0.15    0.08 
   0  -1  -4    0.22    0.07 
   0  -1  -4    0.13    0.07 
   0  -1  -4    0.25    0.08 
   0  -1  -4    0.19    0.07 
   0   1   4    0.24    0.06 
   0   1   4    0.31    0.08 
   0   1   4   -0.08    0.06 
   0   1   4    0.05    0.07 
   0   1   4    0.09    0.07 
   0   1   4    0.03    0.09 
   0   1   4    0.21    0.08 
  -1  -1  -4   15.12    0.23 
  -1  -1  -4   15.46    0.19 
  -1  -1  -4   14.70    0.19 
   1   1   4   15.09    0.19 
   1   1   4   15.05    0.19 
   1   1   4   15.25    0.24 
   1   1   4   15.20    0.19 
   1   1   4   14.91    0.19 
  -2  -1  -4   37.07    0.45 
  -2  -1  -4   37.43    0.42 
  -2  -1  -4   36.93    0.41 
  -2  -1  -4   35.01    0.41 
  -2  -1  -4   35.76    0.41 
   2   1   4   35.51    0.42 
   2   1   4   36.38    0.41 
   2   1   4   36.92    0.42 
   2   1   4   36.39    0.41 
   2   1   4   37.95    0.47 
  -3  -1  -4  107.02    0.76 
  -3  -1  -4  108.71    0.77 
  -3  -1  -4  109.77    0.75 
  -3  -1  -4  106.91    0.76 
  -3  -1  -4  108.12    0.76 
  -3  -1  -4  109.61    0.75 
   3   1   4  107.55    0.78 
   3   1   4  107.36    0.81 
   3   1   4  109.55    0.76 
   3   1   4  106.32    0.76 
   3   1   4  108.09    0.76 
   3   1   4  107.30    0.76 
  -4  -1  -4    0.51    0.08 
  -4  -1  -4    0.33    0.08 
  -4  -1  -4    0.56    0.11 
   4   1   4    0.49    0.12 
   4   1   4    0.69    0.07 
   4   1   4    0.60    0.07 
   4   1   4    0.64    0.07 
   4   1   4    0.41    0.14 
   4   1   4    0.27    0.09 
  -5  -1  -4    1.86    0.10 
  -5  -1  -4    2.01    0.14 
  -5  -1  -4    2.14    0.10 
   5   1   4    1.92    0.20 
   5   1   4    2.02    0.12 
   5   1   4    1.99    0.13 
   5   1   4    2.48    0.17 
   5   1   4    1.88    0.08 
   5   1   4    2.08    0.08 
  -6  -1  -4    1.62    0.20 
  -6  -1  -4    1.45    0.13 
   6   1   4    1.34    0.18 
   6   1   4    1.53    0.27 
   6   1   4    1.72    0.23 
   6   1   4    1.36    0.12 
   6   1   4    1.12    0.15 
  -7  -1  -4   20.98    0.28 
  -7  -1  -4   20.31    0.33 
   7   1   4   19.89    0.32 
   7   1   4   18.97    0.39 
  -8  -1  -4    3.96    0.25 
   7  -2  -4    5.41    0.20 
   7  -2  -4    5.38    0.27 
   7  -2  -4    5.29    0.39 
  -7   2   4    5.64    0.22 
   6  -2  -4   16.33    0.41 
   6  -2  -4   16.37    0.29 
   6  -2  -4   16.59    0.28 
  -6   2   4   17.24    0.27 
   5  -2  -4   11.96    0.29 
   5  -2  -4   12.76    0.18 
   5  -2  -4   12.31    0.19 
  -5   2   4   11.98    0.13 
  -5   2   4   12.36    0.14 
  -5   2   4   11.84    0.17 
  -5   2   4   12.41    0.18 
   4  -2  -4    2.78    0.12 
   4  -2  -4    2.32    0.08 
   4  -2  -4    2.60    0.14 
   4  -2  -4    2.68    0.19 
   4  -2  -4    2.21    0.11 
   4  -2  -4    2.32    0.09 
  -4   2   4    2.29    0.09 
  -4   2   4    2.38    0.07 
  -4   2   4    2.54    0.07 
   3  -2  -4   13.13    0.35 
   3  -2  -4   13.39    0.28 
   3  -2  -4   12.78    0.24 
   3  -2  -4   13.10    0.25 
   3  -2  -4   13.00    0.25 
   3  -2  -4   13.28    0.25 
  -3   2   4   13.25    0.24 
  -3   2   4   13.02    0.23 
  -3   2   4   13.37    0.24 
  -3   2   4   13.11    0.32 
  -3   2   4   13.18    0.24 
   2  -2  -4   30.15    0.66 
   2  -2  -4   28.38    0.66 
   2  -2  -4   31.03    0.71 
   2  -2  -4   28.99    0.66 
   2  -2  -4   28.89    0.65 
   2  -2  -4   29.25    0.66 
  -2   2   4   29.68    0.65 
  -2   2   4   28.37    0.65 
  -2   2   4   29.98    0.70 
  -2   2   4   29.25    0.65 
   1  -2  -4   20.56    0.94 
   1  -2  -4   20.38    0.96 
   1  -2  -4   21.68    0.97 
   1  -2  -4   20.78    0.94 
   1  -2  -4   17.48    0.94 
   1  -2  -4   20.26    0.94 
   1  -2  -4   19.13    0.94 
  -1   2   4   18.93    0.93 
  -1   2   4   20.21    0.94 
  -1   2   4   21.76    0.94 
  -1   2   4   19.96    0.94 
  -1   2   4   21.39    0.96 
   0  -2  -4   35.20    0.46 
   0  -2  -4   34.47    0.46 
   0  -2  -4   34.58    0.46 
   0  -2  -4   35.12    0.48 
   0  -2  -4   34.68    0.47 
   0  -2  -4   35.24    0.45 
   0  -2  -4   34.62    0.45 
   0   2   4   35.06    0.46 
   0   2   4   34.90    0.45 
   0   2   4   35.13    0.49 
   0   2   4   35.35    0.46 
   0   2   4   34.64    0.45 
   0   2   4   34.86    0.45 
   0   2   4   34.51    0.47 
  -1  -2  -4  213.01    2.39 
  -1  -2  -4  214.53    2.39 
  -1  -2  -4  221.21    2.39 
  -1  -2  -4  217.43    2.39 
  -1  -2  -4  220.28    2.41 
   1   2   4  216.68    2.39 
   1   2   4  220.37    2.41 
   1   2   4  214.96    2.39 
   1   2   4  218.74    2.39 
   1   2   4  214.10    2.39 
  -2  -2  -4    3.83    0.08 
  -2  -2  -4    3.92    0.05 
  -2  -2  -4    4.12    0.06 
  -2  -2  -4    4.06    0.07 
   2   2   4    4.16    0.11 
   2   2   4    4.21    0.06 
   2   2   4    4.22    0.07 
   2   2   4    4.32    0.06 
  -3  -2  -4   27.82    0.58 
  -3  -2  -4   27.38    0.58 
  -3  -2  -4   27.68    0.59 
  -3  -2  -4   27.26    0.58 
  -3  -2  -4   26.69    0.58 
  -3  -2  -4   26.44    0.59 
   3   2   4   27.44    0.63 
   3   2   4   27.04    0.58 
   3   2   4   27.77    0.58 
   3   2   4   25.99    0.58 
   3   2   4   27.44    0.58 
   3   2   4   28.17    0.59 
  -4  -2  -4   51.97    0.51 
  -4  -2  -4   50.37    0.53 
  -4  -2  -4   52.24    0.52 
  -4  -2  -4   51.18    0.50 
  -4  -2  -4   53.82    0.50 
  -4  -2  -4   53.68    0.50 
   4   2   4   51.55    0.58 
   4   2   4   53.28    0.51 
   4   2   4   52.39    0.51 
   4   2   4   51.52    0.51 
   4   2   4   52.97    0.51 
   4   2   4   52.20    0.54 
  -5  -2  -4   12.65    0.20 
  -5  -2  -4   12.48    0.19 
  -5  -2  -4   11.59    0.27 
  -5  -2  -4   12.41    0.20 
  -5  -2  -4   12.38    0.25 
  -5  -2  -4   11.88    0.23 
   5   2   4   11.67    0.24 
   5   2   4   12.62    0.23 
   5   2   4   12.09    0.23 
   5   2   4   11.35    0.30 
   5   2   4   12.30    0.31 
   5   2   4   12.69    0.23 
  -6  -2  -4    4.62    0.18 
  -6  -2  -4    4.39    0.11 
  -6  -2  -4    4.90    0.18 
  -6  -2  -4    4.61    0.15 
   6   2   4    4.23    0.19 
   6   2   4    4.99    0.13 
   6   2   4    4.67    0.22 
   6   2   4    4.62    0.17 
   6   2   4    4.72    0.26 
  -7  -2  -4    4.19    0.22 
   7   2   4    4.06    0.29 
   7   2   4    2.88    0.27 
  -8  -2  -4    1.14    0.25 
   8   2   4    1.23    0.35 
   7  -3  -4    2.23    0.26 
   7  -3  -4    1.79    0.37 
  -7   3   4    2.36    0.21 
   6  -3  -4    3.97    0.34 
   6  -3  -4    3.92    0.16 
   6  -3  -4    3.44    0.18 
  -6   3   4    4.15    0.19 
   5  -3  -4    0.48    0.14 
   5  -3  -4    0.34    0.11 
   5  -3  -4    0.14    0.14 
   5  -3  -4    0.83    0.25 
  -5   3   4    0.50    0.14 
  -5   3   4    0.29    0.12 
   4  -3  -4   12.89    0.20 
   4  -3  -4   13.89    0.23 
   4  -3  -4   13.95    0.27 
   4  -3  -4   14.00    0.22 
   4  -3  -4   14.33    0.37 
   4  -3  -4   13.47    0.22 
  -4   3   4   13.69    0.22 
  -4   3   4   13.66    0.21 
  -4   3   4   13.34    0.18 
  -4   3   4   13.43    0.18 
   3  -3  -4    7.76    0.10 
   3  -3  -4    7.72    0.18 
   3  -3  -4    7.75    0.11 
   3  -3  -4    7.84    0.14 
   3  -3  -4    7.97    0.12 
   3  -3  -4    7.54    0.11 
  -3   3   4    7.40    0.10 
  -3   3   4    7.57    0.09 
  -3   3   4    7.68    0.09 
  -3   3   4    8.38    0.12 
   2  -3  -4   21.13    0.35 
   2  -3  -4   20.34    0.26 
   2  -3  -4   20.68    0.27 
   2  -3  -4   20.46    0.26 
   2  -3  -4   20.86    0.27 
   2  -3  -4   20.47    0.27 
  -2   3   4   20.31    0.26 
  -2   3   4   20.58    0.32 
  -2   3   4   20.33    0.25 
  -2   3   4   20.69    0.26 
   1  -3  -4    5.55    0.24 
   1  -3  -4    5.40    0.28 
   1  -3  -4    5.99    0.30 
   1  -3  -4    5.28    0.24 
   1  -3  -4    5.04    0.24 
   1  -3  -4    5.01    0.24 
   1  -3  -4    5.83    0.24 
  -1   3   4    5.88    0.24 
  -1   3   4    5.68    0.28 
  -1   3   4    5.39    0.24 
  -1   3   4    5.08    0.23 
  -1   3   4    5.18    0.24 
   0  -3  -4   22.55    0.16 
   0  -3  -4   22.51    0.16 
   0  -3  -4   23.19    0.17 
   0  -3  -4   22.76    0.17 
   0  -3  -4   22.81    0.21 
   0  -3  -4   22.49    0.22 
   0   3   4   22.71    0.17 
   0   3   4   22.94    0.16 
   0   3   4   22.70    0.23 
   0   3   4   22.48    0.17 
   0   3   4   22.60    0.17 
   0   3   4   22.84    0.17 
  -1  -3  -4  451.12    4.98 
  -1  -3  -4  449.22    4.98 
  -1  -3  -4  445.15    4.98 
  -1  -3  -4  439.76    4.98 
  -1  -3  -4  448.20    4.97 
  -1  -3  -4  448.31    5.00 
   1   3   4  447.79    4.98 
   1   3   4  442.75    4.98 
   1   3   4  445.88    5.00 
   1   3   4  444.35    4.98 
   1   3   4  443.97    4.98 
  -2  -3  -4   15.92    0.14 
  -2  -3  -4   16.59    0.14 
  -2  -3  -4   16.63    0.15 
  -2  -3  -4   16.34    0.14 
  -2  -3  -4   15.95    0.18 
   2   3   4   16.29    0.15 
   2   3   4   16.52    0.22 
   2   3   4   16.34    0.15 
   2   3   4   16.32    0.15 
  -3  -3  -4    1.50    0.09 
  -3  -3  -4    1.13    0.11 
  -3  -3  -4    1.00    0.09 
  -3  -3  -4    1.02    0.08 
  -3  -3  -4    0.86    0.10 
   3   3   4    0.95    0.08 
   3   3   4    1.45    0.14 
   3   3   4    0.99    0.09 
   3   3   4    1.60    0.10 
  -4  -3  -4   63.71    0.60 
  -4  -3  -4   62.96    0.60 
  -4  -3  -4   64.35    0.61 
  -4  -3  -4   61.70    0.62 
  -4  -3  -4   62.75    0.61 
  -4  -3  -4   63.83    0.62 
   4   3   4   62.89    0.60 
   4   3   4   63.54    0.63 
   4   3   4   62.86    0.67 
   4   3   4   63.74    0.61 
   4   3   4   63.01    0.60 
   4   3   4   65.16    0.60 
  -5  -3  -4   42.41    0.45 
  -5  -3  -4   40.36    0.45 
  -5  -3  -4   40.72    0.39 
  -5  -3  -4   40.40    0.40 
  -5  -3  -4   41.37    0.41 
  -5  -3  -4   40.85    0.42 
   5   3   4   40.52    0.47 
   5   3   4   42.00    0.44 
   5   3   4   41.28    0.54 
   5   3   4   41.20    0.41 
   5   3   4   42.11    0.42 
  -6  -3  -4    6.29    0.17 
  -6  -3  -4    6.17    0.20 
  -6  -3  -4    5.86    0.14 
  -6  -3  -4    5.86    0.13 
  -6  -3  -4    5.77    0.19 
  -6  -3  -4    6.09    0.19 
   6   3   4    6.90    0.22 
   6   3   4    6.18    0.18 
   6   3   4    6.50    0.22 
   6   3   4    6.40    0.30 
   6   3   4    5.73    0.26 
  -7  -3  -4    3.37    0.21 
   7   3   4    3.55    0.29 
   7   3   4    1.90    0.27 
   7   3   4    3.24    0.17 
   7   3   4    2.56    0.21 
  -8  -3  -4    0.45    0.21 
   7  -4  -4   -0.05    0.36 
   7  -4  -4    0.29    0.25 
  -7   4   4    0.25    0.22 
   6  -4  -4   -0.01    0.29 
   6  -4  -4    0.06    0.12 
   6  -4  -4    0.16    0.19 
  -6   4   4    0.20    0.18 
   5  -4  -4   16.18    0.29 
   5  -4  -4   17.06    0.29 
   5  -4  -4   17.45    0.50 
   5  -4  -4   16.24    0.30 
  -5   4   4   17.40    0.31 
   4  -4  -4    2.47    0.15 
   4  -4  -4    2.65    0.12 
   4  -4  -4    2.29    0.12 
   4  -4  -4    2.23    0.10 
   4  -4  -4    2.19    0.09 
   4  -4  -4    2.71    0.22 
  -4   4   4    2.33    0.12 
  -4   4   4    2.19    0.09 
   3  -4  -4   13.49    0.35 
   3  -4  -4   12.85    0.22 
   3  -4  -4   13.18    0.21 
   3  -4  -4   13.27    0.22 
   3  -4  -4   12.55    0.20 
   3  -4  -4   13.84    0.24 
  -3   4   4   13.00    0.19 
  -3   4   4   13.09    0.21 
  -3   4   4   13.29    0.22 
  -3   4   4   12.98    0.19 
   2  -4  -4   13.70    0.17 
   2  -4  -4   14.86    0.19 
   2  -4  -4   14.60    0.19 
   2  -4  -4   14.29    0.29 
   2  -4  -4   13.89    0.18 
   2  -4  -4   13.88    0.19 
  -2   4   4   13.55    0.16 
  -2   4   4   14.49    0.17 
  -2   4   4   13.78    0.16 
  -2   4   4   14.10    0.18 
   1  -4  -4    2.66    0.10 
   1  -4  -4    2.89    0.10 
   1  -4  -4    3.21    0.11 
   1  -4  -4    2.62    0.12 
   1  -4  -4    2.71    0.10 
   1  -4  -4    3.33    0.10 
   1  -4  -4    2.70    0.14 
  -1   4   4    2.97    0.10 
  -1   4   4    2.88    0.10 
  -1   4   4    3.03    0.10 
  -1   4   4    3.02    0.09 
  -1   4   4    2.54    0.09 
   0  -4  -4   22.48    0.40 
   0  -4  -4   23.35    0.44 
   0  -4  -4   22.60    0.41 
   0  -4  -4   23.29    0.40 
   0  -4  -4   21.39    0.40 
   0  -4  -4   22.88    0.40 
   0   4   4   21.69    0.40 
   0   4   4   23.14    0.40 
   0   4   4   22.17    0.40 
   0   4   4   22.79    0.40 
   0   4   4   22.55    0.41 
   0   4   4   23.90    0.45 
  -1  -4  -4   97.40    1.30 
  -1  -4  -4   99.75    1.30 
  -1  -4  -4   98.74    1.30 
  -1  -4  -4   98.92    1.31 
  -1  -4  -4   99.07    1.32 
   1   4   4   98.90    1.31 
   1   4   4   98.36    1.30 
   1   4   4   98.77    1.33 
   1   4   4   98.35    1.30 
   1   4   4   98.02    1.30 
   1   4   4   98.54    1.31 
  -2  -4  -4  185.07    1.98 
  -2  -4  -4  180.63    1.99 
  -2  -4  -4  181.77    1.97 
  -2  -4  -4  180.38    1.97 
  -2  -4  -4  185.69    1.97 
   2   4   4  179.02    1.97 
   2   4   4  182.37    1.96 
   2   4   4  181.02    1.97 
   2   4   4  183.53    2.00 
   2   4   4  182.98    1.97 
  -3  -4  -4   23.95    0.37 
  -3  -4  -4   25.22    0.36 
  -3  -4  -4   24.73    0.37 
  -3  -4  -4   24.93    0.40 
  -3  -4  -4   24.04    0.36 
   3   4   4   25.37    0.37 
   3   4   4   25.35    0.37 
   3   4   4   23.26    0.43 
   3   4   4   26.51    0.37 
  -4  -4  -4    1.67    0.16 
   4   4   4    1.36    0.18 
  -5  -4  -4   18.66    0.34 
  -5  -4  -4   20.33    0.37 
  -5  -4  -4   17.37    0.37 
  -5  -4  -4   17.19    0.31 
  -5  -4  -4   19.10    0.33 
   5   4   4   19.01    0.35 
   5   4   4   18.50    0.33 
   5   4   4   18.83    0.49 
   5   4   4   19.92    0.33 
  -6  -4  -4   11.47    0.17 
  -6  -4  -4   12.68    0.22 
  -6  -4  -4   11.82    0.23 
  -6  -4  -4   12.94    0.23 
   6   4   4   12.67    0.23 
   6   4   4   12.34    0.29 
   6   4   4   12.99    0.25 
   6   4   4   12.61    0.27 
   6   4   4   12.64    0.38 
  -7  -4  -4    0.06    0.13 
  -7  -4  -4   -0.07    0.17 
   7   4   4   -0.98    0.27 
   7   4   4    0.26    0.27 
   7   4   4    0.07    0.17 
   7   4   4   -0.36    0.19 
  -8  -4  -4    0.23    0.20 
   8   4   4    0.34    0.22 
   6  -5  -4    0.22    0.33 
   6  -5  -4    0.35    0.18 
  -6   5   4    0.15    0.20 
   5  -5  -4    0.01    0.27 
   5  -5  -4   -0.07    0.11 
   5  -5  -4   -0.50    0.14 
  -5   5   4   -0.24    0.14 
   4  -5  -4   44.24    0.46 
   4  -5  -4   45.03    0.46 
   4  -5  -4   45.30    0.46 
   4  -5  -4   45.85    0.51 
   4  -5  -4   45.80    0.61 
  -4   5   4   46.34    0.47 
  -4   5   4   43.71    0.45 
   3  -5  -4   15.08    0.28 
   3  -5  -4   14.90    0.19 
   3  -5  -4   14.87    0.22 
   3  -5  -4   14.79    0.18 
   3  -5  -4   14.45    0.17 
   3  -5  -4   14.91    0.19 
  -3   5   4   14.64    0.17 
  -3   5   4   15.12    0.20 
   2  -5  -4   11.52    0.20 
   2  -5  -4   11.33    0.20 
   2  -5  -4   11.28    0.19 
   2  -5  -4   11.32    0.31 
   2  -5  -4   11.18    0.20 
   2  -5  -4   10.85    0.23 
   2  -5  -4   10.46    0.18 
  -2   5   4   11.05    0.18 
  -2   5   4   11.25    0.20 
  -2   5   4   11.04    0.17 
   1  -5  -4    5.14    0.15 
   1  -5  -4    4.41    0.15 
   1  -5  -4    4.68    0.14 
   1  -5  -4    4.24    0.19 
   1  -5  -4    4.77    0.14 
   1  -5  -4    4.55    0.17 
   1  -5  -4    4.08    0.13 
  -1   5   4    4.78    0.14 
  -1   5   4    4.61    0.14 
  -1   5   4    4.49    0.13 
  -1   5   4    4.54    0.14 
  -1   5   4    4.25    0.13 
   0  -5  -4    1.99    0.09 
   0  -5  -4    1.80    0.09 
   0  -5  -4    1.85    0.09 
   0  -5  -4    1.75    0.09 
   0  -5  -4    1.46    0.11 
   0  -5  -4    1.66    0.09 
   0   5   4    1.95    0.08 
   0   5   4    1.74    0.08 
   0   5   4    2.01    0.09 
   0   5   4    1.99    0.11 
  -1  -5  -4   18.65    0.35 
  -1  -5  -4   17.65    0.35 
  -1  -5  -4   18.67    0.34 
  -1  -5  -4   18.44    0.38 
  -1  -5  -4   18.83    0.35 
   1   5   4   18.45    0.35 
   1   5   4   18.83    0.40 
   1   5   4   18.65    0.35 
   1   5   4   18.53    0.35 
   1   5   4   17.61    0.34 
   1   5   4   17.80    0.34 
  -2  -5  -4   80.88    1.11 
  -2  -5  -4   82.29    1.11 
  -2  -5  -4   81.77    1.11 
  -2  -5  -4   82.51    1.12 
  -2  -5  -4   81.80    1.13 
   2   5   4   82.88    1.11 
   2   5   4   81.33    1.11 
   2   5   4   82.25    1.10 
   2   5   4   83.79    1.15 
   2   5   4   81.57    1.11 
   2   5   4   82.76    1.11 
  -3  -5  -4   23.83    0.39 
  -3  -5  -4   23.33    0.40 
  -3  -5  -4   23.28    0.42 
  -3  -5  -4   24.65    0.40 
  -3  -5  -4   23.63    0.43 
  -3  -5  -4   23.40    0.39 
   3   5   4   24.41    0.45 
   3   5   4   23.85    0.39 
   3   5   4   23.30    0.39 
   3   5   4   23.31    0.39 
  -4  -5  -4   16.98    0.24 
  -4  -5  -4   17.26    0.24 
  -4  -5  -4   18.30    0.27 
  -4  -5  -4   16.16    0.29 
  -4  -5  -4   17.87    0.26 
   4   5   4   17.01    0.26 
   4   5   4   16.96    0.26 
   4   5   4   17.92    0.25 
   4   5   4   17.67    0.35 
  -5  -5  -4    8.76    0.17 
  -5  -5  -4    9.63    0.15 
  -5  -5  -4    9.58    0.15 
  -5  -5  -4    9.09    0.11 
  -5  -5  -4    9.45    0.13 
   5   5   4    9.51    0.14 
   5   5   4    9.68    0.24 
   5   5   4   10.09    0.16 
   5   5   4    9.55    0.16 
  -6  -5  -4    4.54    0.16 
  -6  -5  -4    4.58    0.15 
  -6  -5  -4    4.79    0.16 
  -6  -5  -4    4.52    0.18 
   6   5   4    4.75    0.26 
   6   5   4    4.75    0.18 
   6   5   4    4.79    0.20 
  -7  -5  -4    3.28    0.19 
  -7  -5  -4    3.03    0.19 
   7   5   4    3.74    0.24 
   7   5   4    3.51    0.23 
  -8  -5  -4    1.24    0.20 
   8   5   4    0.92    0.26 
   8   5   4    1.36    0.32 
   8   5   4    1.17    0.20 
   6  -6  -4    2.04    0.38 
   6  -6  -4    2.31    0.21 
  -6   6   4    1.58    0.23 
   5  -6  -4    1.44    0.30 
   5  -6  -4    1.50    0.17 
   5  -6  -4    1.68    0.16 
  -5   6   4    1.94    0.18 
   4  -6  -4    3.06    0.12 
   4  -6  -4    3.14    0.14 
   4  -6  -4    3.38    0.14 
   4  -6  -4    3.99    0.28 
  -4   6   4    3.00    0.15 
   3  -6  -4    1.34    0.08 
   3  -6  -4    1.64    0.20 
   3  -6  -4    1.26    0.09 
   3  -6  -4    1.31    0.11 
   3  -6  -4    0.86    0.11 
   3  -6  -4    1.38    0.12 
  -3   6   4    1.21    0.08 
  -3   6   4    1.31    0.12 
   2  -6  -4   11.85    0.20 
   2  -6  -4   12.06    0.19 
   2  -6  -4   11.56    0.18 
   2  -6  -4   12.06    0.26 
   2  -6  -4   12.07    0.19 
   2  -6  -4   12.49    0.20 
  -2   6   4   12.48    0.20 
  -2   6   4   11.78    0.18 
  -2   6   4   12.02    0.16 
  -2   6   4   11.89    0.16 
   1  -6  -4   60.95    0.85 
   1  -6  -4   61.21    0.85 
   1  -6  -4   62.54    0.85 
   1  -6  -4   59.87    0.85 
   1  -6  -4   60.39    0.85 
   1  -6  -4   61.61    0.91 
   1  -6  -4   61.16    0.89 
  -1   6   4   61.58    0.85 
  -1   6   4   62.36    0.84 
  -1   6   4   61.28    0.84 
  -1   6   4   61.97    0.86 
  -1   6   4   60.97    0.84 
   0  -6  -4   11.66    0.18 
   0  -6  -4   11.55    0.17 
   0  -6  -4   11.74    0.24 
   0  -6  -4   11.34    0.17 
   0  -6  -4   11.42    0.17 
   0  -6  -4   11.21    0.16 
   0   6   4   11.35    0.16 
   0   6   4   11.69    0.16 
   0   6   4   11.49    0.18 
   0   6   4   11.78    0.16 
  -1  -6  -4    1.50    0.07 
  -1  -6  -4    1.71    0.07 
  -1  -6  -4    1.43    0.08 
  -1  -6  -4    1.37    0.09 
  -1  -6  -4    1.41    0.09 
   1   6   4    1.65    0.07 
   1   6   4    1.71    0.08 
   1   6   4    1.69    0.09 
   1   6   4    1.43    0.06 
   1   6   4    1.69    0.11 
   1   6   4    1.64    0.10 
   1   6   4    1.64    0.07 
  -2  -6  -4   21.11    0.29 
  -2  -6  -4   20.34    0.26 
  -2  -6  -4   20.77    0.25 
  -2  -6  -4   21.35    0.27 
   2   6   4   21.42    0.26 
   2   6   4   21.11    0.25 
   2   6   4   20.61    0.25 
   2   6   4   21.28    0.25 
   2   6   4   21.79    0.33 
   2   6   4   20.89    0.26 
  -3  -6  -4   33.22    0.38 
  -3  -6  -4   34.48    0.40 
  -3  -6  -4   33.96    0.39 
  -3  -6  -4   33.71    0.41 
  -3  -6  -4   32.76    0.37 
   3   6   4   34.68    0.39 
   3   6   4   34.23    0.46 
   3   6   4   34.08    0.38 
   3   6   4   33.93    0.43 
   3   6   4   33.80    0.39 
  -4  -6  -4   19.43    0.22 
  -4  -6  -4   19.76    0.24 
  -4  -6  -4   19.56    0.23 
  -4  -6  -4   18.39    0.24 
   4   6   4   19.37    0.23 
   4   6   4   19.84    0.24 
   4   6   4   20.03    0.33 
   4   6   4   19.45    0.23 
  -5  -6  -4   -0.18    0.12 
  -5  -6  -4   -0.16    0.14 
  -5  -6  -4   -0.38    0.14 
   5   6   4   -0.30    0.11 
   5   6   4    0.00    0.13 
   5   6   4    0.23    0.19 
   5   6   4   -0.08    0.12 
  -6  -6  -4   -0.11    0.18 
  -6  -6  -4   -0.37    0.14 
  -6  -6  -4   -0.23    0.15 
   6   6   4   -0.22    0.18 
   6   6   4   -0.32    0.14 
   6   6   4   -0.55    0.22 
  -7  -6  -4    3.35    0.16 
  -7  -6  -4    3.58    0.20 
   7   6   4    3.90    0.19 
   7   6   4    3.80    0.29 
   7   6   4    4.19    0.28 
  -8  -6  -4    1.24    0.22 
   8   6   4    1.16    0.23 
   8   6   4    0.92    0.25 
   8   6   4    1.28    0.32 
   5  -7  -4   10.50    0.22 
   5  -7  -4   10.79    0.41 
  -5   7   4   10.39    0.24 
   4  -7  -4    8.07    0.36 
   4  -7  -4    8.02    0.21 
   4  -7  -4    8.12    0.20 
   4  -7  -4    8.46    0.21 
  -4   7   4    8.68    0.24 
   3  -7  -4    1.62    0.12 
   3  -7  -4    1.83    0.14 
   3  -7  -4    1.69    0.10 
   3  -7  -4    1.71    0.25 
   3  -7  -4    2.11    0.13 
  -3   7   4    1.88    0.15 
  -3   7   4    1.63    0.09 
   2  -7  -4    4.11    0.22 
   2  -7  -4    4.47    0.13 
   2  -7  -4    3.84    0.13 
   2  -7  -4    4.02    0.12 
   2  -7  -4    3.73    0.11 
  -2   7   4    4.01    0.14 
   1  -7  -4   31.91    0.35 
   1  -7  -4   32.95    0.35 
   1  -7  -4   33.16    0.35 
   1  -7  -4   32.50    0.42 
   1  -7  -4   32.33    0.35 
   1  -7  -4   32.89    0.45 
  -1   7   4   32.68    0.35 
  -1   7   4   32.69    0.33 
  -1   7   4   33.20    0.35 
  -1   7   4   32.79    0.34 
   0  -7  -4  134.38    1.69 
   0  -7  -4  132.92    1.69 
   0  -7  -4  134.91    1.71 
   0  -7  -4  138.47    1.69 
   0  -7  -4  134.04    1.69 
   0  -7  -4  134.02    1.69 
   0   7   4  136.28    1.68 
   0   7   4  135.85    1.69 
   0   7   4  134.22    1.68 
   0   7   4  132.54    1.68 
  -1  -7  -4   17.63    0.29 
  -1  -7  -4   16.34    0.27 
  -1  -7  -4   16.22    0.27 
  -1  -7  -4   16.12    0.31 
  -1  -7  -4   16.49    0.28 
   1   7   4   16.50    0.27 
   1   7   4   16.45    0.27 
   1   7   4   16.55    0.28 
   1   7   4   16.40    0.28 
   1   7   4   15.53    0.26 
   1   7   4   16.56    0.26 
   1   7   4   17.10    0.33 
  -2  -7  -4    9.55    0.14 
  -2  -7  -4    8.87    0.12 
  -2  -7  -4    9.21    0.14 
  -2  -7  -4    9.24    0.12 
   2   7   4    9.31    0.12 
   2   7   4    9.01    0.11 
   2   7   4    9.71    0.11 
   2   7   4    9.31    0.13 
   2   7   4    9.37    0.13 
   2   7   4    9.03    0.16 
   2   7   4    9.53    0.13 
   2   7   4    9.37    0.14 
  -3  -7  -4    4.36    0.15 
  -3  -7  -4    3.79    0.11 
  -3  -7  -4    3.88    0.12 
  -3  -7  -4    4.04    0.14 
   3   7   4    4.02    0.12 
   3   7   4    4.31    0.12 
   3   7   4    3.68    0.16 
   3   7   4    4.43    0.14 
  -4  -7  -4    3.71    0.13 
  -4  -7  -4    3.96    0.17 
  -4  -7  -4    3.77    0.16 
   4   7   4    3.62    0.14 
   4   7   4    3.94    0.21 
   4   7   4    3.62    0.15 
   4   7   4    3.89    0.16 
   4   7   4    3.71    0.15 
  -5  -7  -4    0.66    0.14 
  -5  -7  -4   -0.08    0.16 
  -5  -7  -4    0.47    0.16 
   5   7   4    0.68    0.22 
   5   7   4    0.59    0.13 
   5   7   4    0.79    0.15 
   5   7   4    0.63    0.14 
  -6  -7  -4    0.15    0.15 
  -6  -7  -4    0.02    0.14 
   6   7   4   -0.09    0.17 
   6   7   4    0.05    0.25 
   6   7   4   -0.17    0.19 
  -7  -7  -4    0.22    0.21 
  -7  -7  -4   -0.11    0.16 
   7   7   4   -0.07    0.23 
   7   7   4    0.25    0.27 
   7   7   4    0.25    0.25 
  -8  -7  -4    1.38    0.20 
  -8  -7  -4    1.37    0.21 
   5  -8  -4    1.25    0.37 
   5  -8  -4    1.43    0.16 
  -5   8   4    1.32    0.23 
   4  -8  -4    8.63    0.19 
   4  -8  -4    9.04    0.38 
  -4   8   4    9.21    0.23 
   3  -8  -4    2.69    0.16 
   3  -8  -4    2.91    0.16 
   3  -8  -4    2.80    0.29 
   3  -8  -4    2.47    0.15 
  -3   8   4    2.48    0.20 
   2  -8  -4    0.78    0.11 
   2  -8  -4    0.56    0.10 
   2  -8  -4    0.58    0.12 
   2  -8  -4    0.71    0.22 
  -2   8   4    0.37    0.15 
  -2   8   4    0.64    0.07 
   1  -8  -4   11.35    0.13 
   1  -8  -4   11.82    0.15 
   1  -8  -4   11.31    0.14 
  -1   8   4   11.65    0.16 
  -1   8   4   11.50    0.11 
  -1   8   4   11.20    0.12 
  -1   8   4   11.61    0.12 
   0  -8  -4   11.46    0.21 
   0  -8  -4   12.15    0.20 
   0  -8  -4   12.45    0.21 
   0  -8  -4   12.28    0.21 
   0   8   4   12.26    0.20 
   0   8   4   12.48    0.19 
   0   8   4   12.22    0.20 
   0   8   4   12.72    0.21 
  -1  -8  -4   16.07    0.28 
  -1  -8  -4   15.94    0.28 
  -1  -8  -4   16.45    0.29 
  -1  -8  -4   17.19    0.30 
  -1  -8  -4   16.37    0.32 
   1   8   4   16.95    0.29 
   1   8   4   16.66    0.28 
   1   8   4   16.83    0.30 
   1   8   4   17.36    0.27 
  -2  -8  -4    1.35    0.10 
  -2  -8  -4    1.35    0.11 
  -2  -8  -4    1.32    0.10 
  -2  -8  -4    1.57    0.13 
   2   8   4    1.36    0.10 
   2   8   4    1.91    0.13 
   2   8   4    1.62    0.11 
   2   8   4    1.26    0.14 
   2   8   4    1.66    0.09 
   2   8   4    1.46    0.12 
   2   8   4    1.56    0.12 
  -3  -8  -4    1.79    0.14 
  -3  -8  -4    1.73    0.10 
  -3  -8  -4    1.36    0.09 
  -3  -8  -4    1.55    0.12 
   3   8   4    1.70    0.14 
   3   8   4    1.69    0.12 
   3   8   4    1.71    0.13 
   3   8   4    1.58    0.16 
   3   8   4    1.86    0.12 
   3   8   4    1.70    0.10 
  -4  -8  -4    4.83    0.15 
  -4  -8  -4    5.20    0.18 
  -4  -8  -4    4.27    0.18 
  -4  -8  -4    4.53    0.13 
   4   8   4    4.52    0.13 
   4   8   4    4.74    0.16 
   4   8   4    5.28    0.15 
   4   8   4    4.34    0.18 
  -5  -8  -4   12.33    0.24 
  -5  -8  -4   11.69    0.25 
   5   8   4   11.84    0.30 
   5   8   4   11.66    0.25 
   5   8   4   11.14    0.21 
   5   8   4   11.85    0.22 
  -6  -8  -4    4.02    0.17 
  -6  -8  -4    4.45    0.21 
   6   8   4    4.44    0.27 
   6   8   4    4.32    0.20 
   6   8   4    4.29    0.34 
  -7  -8  -4    3.73    0.22 
  -7  -8  -4    3.11    0.17 
   7   8   4    3.87    0.31 
   7   8   4    3.42    0.21 
   7   8   4    3.37    0.27 
  -8  -8  -4    0.36    0.26 
  -8  -8  -4    0.37    0.19 
   4  -9  -4    2.45    0.37 
   4  -9  -4    2.18    0.14 
  -4   9   4    2.00    0.22 
   3  -9  -4   11.11    0.18 
   3  -9  -4   11.05    0.18 
   3  -9  -4   11.59    0.34 
  -3   9   4   11.54    0.24 
   2  -9  -4    8.07    0.31 
   2  -9  -4    7.96    0.17 
   2  -9  -4    7.68    0.18 
   2  -9  -4    7.61    0.17 
  -2   9   4    7.25    0.13 
  -2   9   4    8.25    0.22 
   1  -9  -4    2.66    0.12 
   1  -9  -4    2.28    0.10 
   1  -9  -4    2.36    0.11 
  -1   9   4    2.25    0.08 
  -1   9   4    2.27    0.07 
  -1   9   4    2.34    0.08 
  -1   9   4    2.22    0.14 
   0  -9  -4    2.73    0.13 
   0  -9  -4    3.22    0.10 
   0  -9  -4    3.47    0.12 
   0  -9  -4    3.37    0.13 
   0   9   4    3.06    0.13 
   0   9   4    3.27    0.09 
   0   9   4    3.25    0.11 
   0   9   4    3.23    0.09 
  -1  -9  -4    6.13    0.17 
  -1  -9  -4    6.48    0.15 
  -1  -9  -4    6.25    0.14 
   1   9   4    6.51    0.16 
   1   9   4    6.36    0.17 
   1   9   4    6.95    0.15 
   1   9   4    6.52    0.14 
  -2  -9  -4    1.09    0.14 
  -2  -9  -4    0.65    0.14 
  -2  -9  -4    0.71    0.10 
  -2  -9  -4    0.56    0.10 
   2   9   4    1.00    0.10 
   2   9   4    0.85    0.12 
   2   9   4    0.91    0.14 
   2   9   4    0.90    0.14 
   2   9   4    0.98    0.14 
  -3  -9  -4   11.65    0.15 
  -3  -9  -4   11.34    0.14 
  -3  -9  -4   12.38    0.19 
  -3  -9  -4   12.06    0.19 
   3   9   4   12.34    0.18 
   3   9   4   11.05    0.20 
   3   9   4   11.69    0.19 
   3   9   4   12.12    0.19 
   3   9   4   11.47    0.13 
   3   9   4   11.80    0.18 
  -4  -9  -4    1.65    0.17 
  -4  -9  -4    2.08    0.21 
  -4  -9  -4    1.36    0.13 
   4   9   4    2.09    0.16 
   4   9   4    1.71    0.20 
   4   9   4    1.38    0.15 
   4   9   4    1.78    0.19 
  -5  -9  -4    1.77    0.20 
  -5  -9  -4    1.33    0.19 
   5   9   4    1.90    0.19 
   5   9   4    1.19    0.23 
   5   9   4    1.32    0.23 
  -6  -9  -4    1.09    0.25 
   6   9   4    1.37    0.29 
   6   9   4    0.84    0.28 
   6   9   4    1.32    0.22 
  -7  -9  -4    5.77    0.24 
  -7  -9  -4    5.62    0.18 
   7   9   4    5.77    0.27 
   7   9   4    5.52    0.29 
   7   9   4    5.67    0.36 
   4 -10  -4    0.65    0.37 
   4 -10  -4    0.41    0.17 
  -4  10   4    0.03    0.24 
   3 -10  -4    6.87    0.17 
   3 -10  -4    7.54    0.36 
  -3  10   4    7.70    0.25 
   2 -10  -4    3.81    0.16 
   2 -10  -4    3.73    0.31 
   2 -10  -4    3.64    0.16 
  -2  10   4    4.13    0.21 
   1 -10  -4    4.49    0.15 
   1 -10  -4    4.68    0.16 
  -1  10   4    5.07    0.19 
   0 -10  -4    0.14    0.12 
   0 -10  -4   -0.30    0.13 
   0 -10  -4   -0.22    0.12 
   0 -10  -4   -0.52    0.13 
   0  10   4   -0.01    0.10 
   0  10   4   -0.31    0.14 
   0  10   4    0.06    0.10 
   0  10   4   -0.07    0.10 
  -1 -10  -4    1.14    0.12 
  -1 -10  -4    1.39    0.12 
  -1 -10  -4    1.22    0.11 
  -1 -10  -4    1.34    0.15 
   1  10   4    1.32    0.10 
   1  10   4    1.15    0.16 
   1  10   4    1.27    0.11 
   1  10   4    1.10    0.12 
   1  10   4    1.26    0.13 
  -2 -10  -4    3.66    0.14 
  -2 -10  -4    3.48    0.17 
  -2 -10  -4    3.93    0.16 
  -2 -10  -4    3.51    0.12 
   2  10   4    4.03    0.17 
   2  10   4    3.73    0.18 
   2  10   4    2.99    0.12 
   2  10   4    3.63    0.15 
   2  10   4    3.97    0.14 
  -3 -10  -4    9.09    0.21 
  -3 -10  -4    8.52    0.14 
  -3 -10  -4    9.54    0.19 
  -3 -10  -4    8.85    0.14 
   3  10   4    8.63    0.13 
   3  10   4    9.17    0.18 
   3  10   4    8.77    0.19 
   3  10   4    9.16    0.18 
   3  10   4    8.07    0.17 
   3  10   4    8.52    0.19 
  -4 -10  -4   22.82    0.33 
  -4 -10  -4   21.80    0.36 
   4  10   4   22.04    0.33 
   4  10   4   22.55    0.33 
   4  10   4   20.77    0.34 
   4  10   4   21.54    0.33 
  -5 -10  -4    2.18    0.24 
  -5 -10  -4    1.81    0.19 
   5  10   4    2.06    0.21 
   5  10   4    1.70    0.22 
   5  10   4    2.34    0.19 
  -6 -10  -4   -0.36    0.20 
   6  10   4   -0.51    0.25 
   6  10   4   -0.16    0.18 
  -7 -10  -4    1.77    0.16 
   7  10   4    2.29    0.23 
   7  10   4    1.69    0.27 
   7  10   4    1.66    0.34 
   3 -11  -4   -0.04    0.35 
   3 -11  -4    0.67    0.16 
  -3  11   4    0.38    0.23 
   2 -11  -4   12.96    0.41 
   2 -11  -4   12.75    0.24 
  -2  11   4   13.58    0.29 
   1 -11  -4    3.09    0.18 
   1 -11  -4    3.47    0.17 
  -1  11   4    3.74    0.20 
   0 -11  -4    0.21    0.15 
   0 -11  -4   -0.07    0.13 
   0  11   4    0.02    0.10 
   0  11   4    0.00    0.17 
  -1 -11  -4    3.20    0.18 
  -1 -11  -4    3.09    0.15 
   1  11   4    3.38    0.20 
   1  11   4    3.14    0.14 
   1  11   4    3.04    0.14 
  -2 -11  -4    0.21    0.17 
  -2 -11  -4    0.26    0.14 
   2  11   4    0.45    0.16 
   2  11   4    0.66    0.20 
   2  11   4    0.70    0.13 
  -3 -11  -4    3.46    0.20 
  -3 -11  -4    3.16    0.17 
   3  11   4    2.89    0.13 
   3  11   4    3.04    0.16 
   3  11   4    3.36    0.19 
   3  11   4    3.23    0.19 
  -4 -11  -4    5.02    0.21 
  -4 -11  -4    5.25    0.27 
   4  11   4    4.86    0.24 
   4  11   4    5.30    0.21 
   4  11   4    4.28    0.22 
   4  11   4    4.75    0.24 
  -5 -11  -4    3.40    0.33 
  -5 -11  -4    3.33    0.24 
   5  11   4    3.12    0.24 
   5  11   4    3.72    0.20 
   5  11   4    2.54    0.24 
  -6 -11  -4    2.14    0.23 
   6  11   4    1.95    0.20 
   6  11   4    1.15    0.25 
   2 -12  -4    0.68    0.35 
   2 -12  -4    0.53    0.16 
  -2  12   4    0.12    0.22 
   1 -12  -4    2.83    0.34 
   1 -12  -4    2.23    0.16 
   1 -12  -4    2.78    0.17 
  -1  12   4    3.17    0.22 
   0 -12  -4    1.70    0.17 
   0 -12  -4    1.68    0.18 
   0  12   4    1.64    0.18 
  -1 -12  -4    3.16    0.17 
  -1 -12  -4    3.32    0.22 
   1  12   4    3.89    0.25 
   1  12   4    3.58    0.17 
   1  12   4    4.04    0.20 
  -2 -12  -4    7.06    0.24 
  -2 -12  -4    6.84    0.22 
   2  12   4    7.41    0.21 
   2  12   4    6.87    0.18 
   2  12   4    6.82    0.17 
  -3 -12  -4    0.20    0.23 
  -3 -12  -4    0.12    0.25 
   3  12   4    0.25    0.20 
   3  12   4   -0.07    0.18 
   3  12   4    0.52    0.21 
  -4 -12  -4    0.32    0.23 
  -4 -12  -4    0.17    0.20 
   4  12   4    0.58    0.23 
   4  12   4    0.99    0.21 
   5  12   4    5.74    0.31 
   5  12   4    5.76    0.30 
  -6 -12  -4    7.23    0.31 
   1 -13  -4    0.21    0.45 
   1 -13  -4    0.27    0.21 
  -1  13   4    0.04    0.22 
   0 -13  -4    0.01    0.19 
   0 -13  -4    0.04    0.16 
   0  13   4   -0.12    0.18 
  -1 -13  -4    0.53    0.21 
  -1 -13  -4    0.20    0.22 
   1  13   4    0.57    0.19 
  -2 -13  -4   30.18    0.44 
  -2 -13  -4   31.03    0.39 
   2  13   4   29.81    0.36 
   2  13   4   30.22    0.38 
   2  13   4   32.27    0.43 
  -3 -13  -4    6.39    0.22 
  -3 -13  -4    6.50    0.30 
   3  13   4    6.30    0.24 
   3  13   4    6.38    0.23 
  -4 -13  -4    0.14    0.24 
  -4 -13  -4    0.12    0.20 
   4  13   4    0.11    0.24 
   4  13   4    0.13    0.23 
  -5 -13  -4    1.31    0.32 
  -5 -13  -4    0.99    0.24 
   5  13   4    1.13    0.28 
   5  13   4    1.50    0.29 
  -1 -14  -4   -0.04    0.23 
   1  14   4    0.13    0.21 
  -2 -14  -4    0.15    0.19 
  -2 -14  -4   -0.12    0.25 
   2  14   4    0.69    0.29 
   2  14   4    0.00    0.22 
   2  14   4    0.34    0.20 
  -3 -14  -4    9.13    0.28 
  -3 -14  -4    8.83    0.34 
   3  14   4    8.17    0.25 
   3  14   4    9.24    0.34 
  -4 -14  -4    1.63    0.26 
   4  14   4    1.27    0.24 
   4  14   4    1.71    0.29 
   5  12  -5   -0.23    0.31 
   4  12  -5    2.99    0.32 
  -4 -12   5    2.92    0.26 
  -4 -12   5    2.60    0.33 
   3  12  -5    2.92    0.34 
   3  12  -5    2.66    0.26 
  -3 -12   5    2.51    0.26 
  -3 -12   5    3.84    0.34 
  -3 -12   5    2.97    0.24 
   2  12  -5    4.70    0.34 
  -2 -12   5    3.61    0.24 
  -2 -12   5    3.45    0.25 
   1  12  -5    1.32    0.31 
  -1 -12   5    0.76    0.22 
   0  12  -5    0.36    0.24 
   0  12  -5    0.81    0.35 
   0 -12   5    0.14    0.20 
   6  11  -5    3.76    0.35 
   5  11  -5    2.64    0.21 
   5  11  -5    2.06    0.30 
  -5 -11   5    2.25    0.26 
  -5 -11   5    2.40    0.29 
   4  11  -5    2.93    0.17 
   4  11  -5    2.65    0.31 
  -4 -11   5    2.61    0.24 
  -4 -11   5    3.07    0.22 
   3  11  -5    3.75    0.32 
  -3 -11   5    4.65    0.33 
  -3 -11   5    3.44    0.23 
  -3 -11   5    3.70    0.20 
   2  11  -5    1.88    0.28 
  -2 -11   5    2.43    0.31 
  -2 -11   5    2.26    0.22 
  -2 -11   5    1.64    0.21 
   1  11  -5    1.95    0.31 
   1  11  -5    0.78    0.22 
  -1 -11   5    0.74    0.19 
  -1 -11   5    0.95    0.30 
  -1 -11   5    0.74    0.20 
   0  11  -5    5.43    0.24 
   0  11  -5    6.28    0.30 
   0 -11   5    5.00    0.20 
  -1  11  -5    0.19    0.30 
  -1  11  -5   -0.38    0.22 
   1 -11   5   -0.57    0.15 
   6  10  -5    7.39    0.28 
  -6 -10   5    6.18    0.29 
   5  10  -5    6.30    0.23 
   5  10  -5    5.68    0.31 
  -5 -10   5    6.85    0.28 
  -5 -10   5    5.95    0.29 
   4  10  -5    5.85    0.30 
   4  10  -5    6.28    0.21 
  -4 -10   5    7.03    0.37 
  -4 -10   5    5.89    0.27 
  -4 -10   5    5.73    0.26 
   3  10  -5    0.59    0.15 
   3  10  -5    1.00    0.28 
  -3 -10   5    0.90    0.21 
  -3 -10   5    0.87    0.22 
  -3 -10   5    1.82    0.31 
   2  10  -5   -0.25    0.25 
  -2 -10   5    0.01    0.18 
  -2 -10   5   -0.15    0.18 
  -2 -10   5    0.30    0.27 
   1  10  -5    4.39    0.20 
   1  10  -5    5.29    0.27 
  -1 -10   5    4.86    0.28 
  -1 -10   5    5.00    0.19 
  -1 -10   5    5.13    0.19 
   0  10  -5    9.99    0.24 
   0  10  -5   11.08    0.31 
   0 -10   5    9.37    0.22 
   0 -10   5    9.51    0.30 
   0 -10   5    9.62    0.20 
  -1  10  -5    1.08    0.27 
  -1  10  -5    0.81    0.22 
   1 -10   5   -0.17    0.26 
   1 -10   5    0.67    0.15 
  -2  10  -5    1.35    0.29 
  -2  10  -5    1.26    0.25 
   2 -10   5    1.31    0.11 
   7   9  -5    0.13    0.23 
  -7  -9   5   -0.07    0.26 
   6   9  -5    0.59    0.22 
  -6  -9   5    0.30    0.23 
   5   9  -5    4.53    0.24 
  -5  -9   5    4.02    0.24 
  -5  -9   5    4.03    0.25 
   4   9  -5    6.28    0.27 
   4   9  -5    7.64    0.20 
  -4  -9   5    7.14    0.22 
  -4  -9   5    6.97    0.24 
  -4  -9   5    8.33    0.33 
   3   9  -5    1.52    0.15 
   3   9  -5    0.68    0.23 
  -3  -9   5    1.24    0.18 
  -3  -9   5    1.36    0.20 
  -3  -9   5    1.94    0.27 
   2   9  -5    0.92    0.23 
   2   9  -5    0.81    0.12 
  -2  -9   5    1.08    0.17 
  -2  -9   5    1.06    0.16 
  -2  -9   5    0.89    0.24 
   1   9  -5    0.60    0.22 
   1   9  -5    0.69    0.17 
   1   9  -5    0.24    0.10 
  -1  -9   5    0.45    0.24 
  -1  -9   5    0.39    0.14 
  -1  -9   5    0.32    0.15 
   0   9  -5   -0.40    0.23 
   0   9  -5    0.06    0.18 
   0  -9   5    0.02    0.14 
   0  -9   5   -0.26    0.23 
   0  -9   5   -0.23    0.14 
   0  -9   5    0.24    0.13 
  -1   9  -5    7.52    0.20 
  -1   9  -5    8.36    0.28 
   1  -9   5    6.47    0.25 
   1  -9   5    7.49    0.16 
  -2   9  -5    0.91    0.28 
  -2   9  -5    0.48    0.22 
   2  -9   5    0.02    0.11 
   2  -9   5   -0.18    0.26 
  -3   9  -5    0.70    0.21 
  -3   9  -5   -0.30    0.23 
   3  -9   5    0.04    0.01 
   7   8  -5    5.31    0.27 
  -7  -8   5    4.14    0.33 
   6   8  -5    2.39    0.22 
   6   8  -5    2.09    0.29 
  -6  -8   5    1.87    0.23 
   5   8  -5    3.99    0.22 
   5   8  -5    3.60    0.24 
   5   8  -5    3.27    0.19 
  -5  -8   5    3.46    0.21 
  -5  -8   5    3.56    0.23 
   4   8  -5    1.12    0.20 
   4   8  -5    1.40    0.17 
  -4  -8   5    1.62    0.28 
  -4  -8   5    1.39    0.18 
  -4  -8   5    1.35    0.20 
   3   8  -5    3.29    0.14 
   3   8  -5    3.22    0.16 
   3   8  -5    2.96    0.23 
  -3  -8   5    3.56    0.16 
  -3  -8   5    3.61    0.14 
  -3  -8   5    3.13    0.25 
  -3  -8   5    3.73    0.18 
   2   8  -5    5.15    0.16 
   2   8  -5    4.52    0.24 
   2   8  -5    5.04    0.14 
   2   8  -5    5.86    0.16 
  -2  -8   5    5.14    0.18 
  -2  -8   5    5.89    0.26 
  -2  -8   5    5.07    0.15 
  -2  -8   5    5.24    0.18 
   1   8  -5   13.99    0.12 
   1   8  -5   14.98    0.22 
   1   8  -5   14.88    0.11 
   1   8  -5   14.42    0.17 
  -1  -8   5   15.20    0.15 
  -1  -8   5   14.76    0.15 
  -1  -8   5   14.99    0.15 
  -1  -8   5   15.52    0.25 
   0   8  -5    2.80    0.21 
   0   8  -5    2.09    0.09 
   0   8  -5    2.49    0.16 
   0  -8   5    2.30    0.13 
   0  -8   5    2.68    0.14 
   0  -8   5    2.79    0.22 
  -1   8  -5    0.17    0.21 
  -1   8  -5   -0.04    0.16 
  -1   8  -5    0.24    0.18 
   1  -8   5    0.26    0.14 
   1  -8   5    0.47    0.12 
   1  -8   5    0.42    0.06 
   1  -8   5    0.65    0.12 
   1  -8   5    0.66    0.12 
   1  -8   5   -0.28    0.20 
  -2   8  -5    6.03    0.27 
  -2   8  -5    6.05    0.22 
  -2   8  -5    6.23    0.22 
   2  -8   5    4.98    0.25 
   2  -8   5    5.86    0.12 
   2  -8   5    6.49    0.14 
   2  -8   5    6.54    0.21 
  -3   8  -5    5.83    0.26 
  -3   8  -5    5.07    0.23 
   3  -8   5    5.42    0.29 
  -4   8  -5    1.90    0.25 
  -4   8  -5    2.00    0.26 
   4  -8   5    2.58    0.33 
   4  -8   5    1.83    0.33 
   7   7  -5    7.65    0.34 
   7   7  -5    7.83    0.27 
  -7  -7   5    7.94    0.29 
   6   7  -5    3.23    0.21 
   6   7  -5    3.00    0.26 
  -6  -7   5    2.91    0.28 
  -6  -7   5    3.05    0.26 
   5   7  -5   21.48    0.41 
   5   7  -5   23.14    0.41 
  -5  -7   5   22.94    0.44 
  -5  -7   5   23.37    0.41 
   4   7  -5    0.82    0.17 
   4   7  -5    0.97    0.15 
  -4  -7   5    0.96    0.12 
  -4  -7   5    0.94    0.18 
  -4  -7   5    1.45    0.25 
  -4  -7   5    0.91    0.16 
   3   7  -5    1.46    0.14 
   3   7  -5    1.26    0.16 
  -3  -7   5    1.31    0.22 
  -3  -7   5    1.26    0.12 
  -3  -7   5    1.14    0.15 
  -3  -7   5    1.30    0.15 
   2   7  -5    1.06    0.20 
   2   7  -5    0.48    0.11 
   2   7  -5    0.65    0.14 
   2   7  -5    1.03    0.12 
  -2  -7   5    0.70    0.14 
  -2  -7   5    0.86    0.22 
  -2  -7   5    0.59    0.14 
  -2  -7   5    0.77    0.12 
   1   7  -5   10.91    0.17 
   1   7  -5   10.47    0.23 
   1   7  -5    9.73    0.17 
  -1  -7   5   11.29    0.20 
  -1  -7   5   10.26    0.25 
  -1  -7   5   10.67    0.18 
  -1  -7   5   10.58    0.19 
   0   7  -5    0.33    0.14 
   0   7  -5   -0.12    0.08 
   0   7  -5    0.48    0.17 
   0   7  -5    0.58    0.18 
   0  -7   5    0.12    0.06 
   0  -7   5    0.31    0.10 
   0  -7   5    0.54    0.18 
   0  -7   5    0.30    0.11 
   0  -7   5    0.53    0.11 
  -1   7  -5   14.44    0.23 
  -1   7  -5   13.41    0.19 
  -1   7  -5   13.28    0.18 
   1  -7   5   14.14    0.15 
   1  -7   5   13.91    0.12 
   1  -7   5   14.66    0.15 
   1  -7   5   15.02    0.25 
   1  -7   5   13.36    0.14 
   1  -7   5   13.89    0.24 
  -2   7  -5    2.61    0.18 
  -2   7  -5    2.43    0.23 
  -2   7  -5    2.45    0.16 
   2  -7   5    3.41    0.19 
   2  -7   5    2.72    0.10 
   2  -7   5    2.82    0.10 
   2  -7   5    3.09    0.11 
   2  -7   5    2.42    0.22 
  -3   7  -5    3.40    0.21 
  -3   7  -5    3.87    0.22 
   3  -7   5    3.73    0.27 
  -4   7  -5    1.38    0.23 
  -4   7  -5    1.13    0.24 
   4  -7   5    1.62    0.29 
   4  -7   5    1.35    0.26 
   4  -7   5    1.08    0.31 
  -5   7  -5    0.55    0.30 
  -5   7  -5    1.13    0.26 
   5  -7   5    1.63    0.35 
   5  -7   5    1.13    0.35 
   8   6  -5    0.15    0.31 
   8   6  -5   -0.02    0.23 
   8   6  -5   -1.24    0.40 
  -8  -6   5   -0.39    0.22 
   7   6  -5    2.02    0.28 
   7   6  -5    1.14    0.34 
   7   6  -5    2.14    0.23 
  -7  -6   5    1.81    0.22 
   6   6  -5    5.40    0.23 
   6   6  -5    6.39    0.22 
  -6  -6   5    6.05    0.20 
  -6  -6   5    5.87    0.25 
   5   6  -5    1.80    0.18 
   5   6  -5    1.30    0.17 
   5   6  -5    1.69    0.17 
  -5  -6   5    1.60    0.14 
  -5  -6   5    1.38    0.18 
  -5  -6   5    1.34    0.16 
   4   6  -5    1.94    0.15 
   4   6  -5    1.90    0.17 
   4   6  -5    1.53    0.14 
  -4  -6   5    1.90    0.17 
  -4  -6   5    1.81    0.24 
  -4  -6   5    1.87    0.16 
  -4  -6   5    1.78    0.13 
   3   6  -5    9.35    0.13 
   3   6  -5    9.77    0.16 
   3   6  -5    9.52    0.19 
   3   6  -5    9.36    0.10 
  -3  -6   5    9.60    0.15 
  -3  -6   5    9.37    0.21 
  -3  -6   5    9.52    0.12 
  -3  -6   5    9.92    0.16 
   2   6  -5    0.17    0.10 
   2   6  -5    0.49    0.10 
   2   6  -5    0.11    0.05 
   2   6  -5    0.30    0.22 
   2   6  -5    0.42    0.17 
  -2  -6   5    0.49    0.12 
  -2  -6   5    0.52    0.12 
  -2  -6   5    0.42    0.17 
  -2  -6   5    0.39    0.09 
   1   6  -5   36.33    0.34 
   1   6  -5   36.15    0.40 
   1   6  -5   34.95    0.34 
   1   6  -5   36.46    0.36 
   1   6  -5   34.84    0.39 
  -1  -6   5   36.09    0.42 
  -1  -6   5   37.11    0.34 
  -1  -6   5   35.01    0.35 
  -1  -6   5   35.35    0.34 
  -1  -6   5   36.05    0.35 
   0   6  -5   54.62    0.64 
   0   6  -5   52.71    0.62 
   0   6  -5   53.56    0.65 
   0   6  -5   52.15    0.61 
   0   6  -5   52.39    0.66 
   0  -6   5   53.57    0.62 
   0  -6   5   53.27    0.67 
   0  -6   5   54.16    0.62 
   0  -6   5   54.08    0.62 
   0  -6   5   52.57    0.61 
   0  -6   5   53.01    0.63 
  -1   6  -5    6.36    0.19 
  -1   6  -5    5.59    0.15 
  -1   6  -5    5.26    0.15 
   1  -6   5    6.10    0.11 
   1  -6   5    5.42    0.09 
   1  -6   5    5.47    0.19 
   1  -6   5    6.07    0.12 
   1  -6   5    5.49    0.11 
   1  -6   5    5.40    0.15 
  -2   6  -5    6.27    0.19 
  -2   6  -5    6.56    0.17 
  -2   6  -5    6.46    0.17 
   2  -6   5    6.12    0.08 
   2  -6   5    6.35    0.08 
   2  -6   5    6.18    0.20 
   2  -6   5    6.25    0.06 
   2  -6   5    6.44    0.15 
   2  -6   5    6.36    0.08 
  -3   6  -5    0.77    0.19 
  -3   6  -5    0.63    0.16 
   3  -6   5    0.11    0.22 
   3  -6   5    0.77    0.19 
  -4   6  -5    5.08    0.24 
  -4   6  -5    4.45    0.26 
   4  -6   5    3.72    0.31 
   4  -6   5    4.46    0.31 
   4  -6   5    5.16    0.30 
  -5   6  -5    1.79    0.24 
  -5   6  -5    1.76    0.29 
   5  -6   5    2.19    0.33 
   5  -6   5    2.16    0.34 
   8   5  -5    0.54    0.26 
   8   5  -5    0.36    0.33 
  -8  -5   5   -0.13    0.24 
   7   5  -5    0.03    0.20 
   7   5  -5   -0.98    0.34 
   7   5  -5    0.00    0.26 
  -7  -5   5   -0.29    0.22 
   6   5  -5   -0.45    0.20 
   6   5  -5   -0.11    0.16 
   6   5  -5   -0.76    0.27 
  -6  -5   5   -0.10    0.21 
  -6  -5   5   -0.39    0.17 
   5   5  -5    1.07    0.13 
   5   5  -5    1.04    0.18 
   5   5  -5    1.04    0.15 
   5   5  -5    1.19    0.25 
  -5  -5   5    1.12    0.15 
  -5  -5   5    1.06    0.18 
   4   5  -5    0.97    0.12 
   4   5  -5    0.99    0.12 
   4   5  -5    1.04    0.14 
  -4  -5   5    1.17    0.11 
  -4  -5   5    1.06    0.13 
  -4  -5   5    1.08    0.20 
  -4  -5   5    0.96    0.14 
   3   5  -5   11.55    0.17 
   3   5  -5   11.37    0.18 
   3   5  -5   11.07    0.15 
  -3  -5   5   11.34    0.17 
  -3  -5   5   11.24    0.15 
  -3  -5   5   11.23    0.17 
  -3  -5   5   11.22    0.21 
   2   5  -5   17.92    0.20 
   2   5  -5   19.38    0.19 
   2   5  -5   18.18    0.18 
   2   5  -5   18.34    0.17 
   2   5  -5   18.85    0.18 
   2   5  -5   18.04    0.16 
  -2  -5   5   19.19    0.25 
  -2  -5   5   18.68    0.16 
  -2  -5   5   18.83    0.18 
  -2  -5   5   18.30    0.17 
  -2  -5   5   18.64    0.18 
   1   5  -5    4.34    0.09 
   1   5  -5    4.58    0.16 
   1   5  -5    4.71    0.10 
   1   5  -5    4.90    0.12 
   1   5  -5    4.03    0.09 
   1   5  -5    4.11    0.12 
  -1  -5   5    4.65    0.10 
  -1  -5   5    4.22    0.11 
  -1  -5   5    4.74    0.11 
  -1  -5   5    4.48    0.09 
  -1  -5   5    4.67    0.16 
   0   5  -5   65.81    0.70 
   0   5  -5   65.28    0.72 
   0   5  -5   63.56    0.67 
   0   5  -5   63.33    0.66 
   0   5  -5   63.58    0.69 
   0   5  -5   67.21    0.67 
   0  -5   5   66.88    0.68 
   0  -5   5   63.67    0.67 
   0  -5   5   67.06    0.69 
   0  -5   5   63.87    0.68 
   0  -5   5   66.63    0.68 
   0  -5   5   66.44    0.72 
  -1   5  -5   42.47    0.62 
  -1   5  -5   42.86    0.60 
  -1   5  -5   42.89    0.60 
   1  -5   5   43.06    0.58 
   1  -5   5   40.13    0.57 
   1  -5   5   41.47    0.57 
   1  -5   5   42.27    0.62 
   1  -5   5   42.52    0.64 
   1  -5   5   41.80    0.58 
  -2   5  -5   23.76    0.29 
  -2   5  -5   24.53    0.29 
  -2   5  -5   24.68    0.27 
   2  -5   5   24.56    0.22 
   2  -5   5   24.39    0.21 
   2  -5   5   22.91    0.30 
   2  -5   5   24.15    0.22 
   2  -5   5   24.27    0.34 
  -3   5  -5    0.97    0.17 
  -3   5  -5    0.88    0.16 
   3  -5   5    0.69    0.18 
   3  -5   5    0.86    0.20 
  -4   5  -5    2.25    0.23 
  -4   5  -5    2.39    0.19 
   4  -5   5    1.88    0.23 
   4  -5   5    1.64    0.26 
   4  -5   5    1.27    0.25 
  -5   5  -5    3.78    0.22 
  -5   5  -5    3.96    0.28 
   5  -5   5    3.62    0.31 
   5  -5   5    4.64    0.32 
  -6   5  -5    2.70    0.27 
  -6   5  -5    3.09    0.24 
   6  -5   5    2.83    0.35 
   6  -5   5    3.75    0.40 
   6  -5   5    3.31    0.33 
   8   4  -5    2.81    0.26 
   8   4  -5    1.13    0.39 
  -8  -4   5    2.94    0.26 
   7   4  -5    5.42    0.22 
   7   4  -5    5.49    0.28 
   7   4  -5    4.48    0.37 
  -7  -4   5    4.88    0.23 
   6   4  -5   -0.51    0.19 
   6   4  -5   -0.20    0.15 
   6   4  -5   -0.61    0.26 
  -6  -4   5   -0.20    0.16 
  -6  -4   5   -0.02    0.21 
   5   4  -5    3.54    0.18 
   5   4  -5    2.93    0.24 
   5   4  -5    3.63    0.15 
   5   4  -5    3.83    0.15 
  -5  -4   5    3.69    0.17 
  -5  -4   5    3.45    0.19 
   4   4  -5    6.46    0.23 
   4   4  -5    7.12    0.15 
   4   4  -5    6.50    0.16 
   4   4  -5    6.54    0.15 
  -4  -4   5    6.57    0.14 
  -4  -4   5    7.36    0.16 
  -4  -4   5    6.88    0.15 
  -4  -4   5    6.66    0.22 
   3   4  -5    5.85    0.21 
   3   4  -5    6.10    0.22 
   3   4  -5    5.59    0.31 
   3   4  -5    6.32    0.22 
   3   4  -5    5.75    0.28 
   3   4  -5    6.89    0.24 
  -3  -4   5    6.33    0.22 
  -3  -4   5    6.21    0.23 
  -3  -4   5    6.24    0.28 
  -3  -4   5    6.09    0.22 
   2   4  -5   89.52    0.77 
   2   4  -5   89.04    0.77 
   2   4  -5   88.90    0.76 
   2   4  -5   89.43    0.77 
   2   4  -5   89.61    0.80 
   2   4  -5   89.52    0.76 
  -2  -4   5   88.53    0.77 
  -2  -4   5   88.15    0.76 
  -2  -4   5   87.86    0.82 
  -2  -4   5   89.26    0.77 
  -2  -4   5   88.15    0.79 
  -2  -4   5   88.79    0.76 
   1   4  -5    1.52    0.09 
   1   4  -5    1.31    0.13 
   1   4  -5    1.43    0.09 
   1   4  -5    1.16    0.12 
   1   4  -5    1.68    0.11 
   1   4  -5    0.92    0.08 
   1   4  -5    1.03    0.08 
  -1  -4   5    1.26    0.14 
  -1  -4   5    1.65    0.09 
  -1  -4   5    0.85    0.07 
  -1  -4   5    1.54    0.10 
  -1  -4   5    1.07    0.13 
  -1  -4   5    0.90    0.09 
   0   4  -5   21.78    0.14 
   0   4  -5   22.03    0.16 
   0   4  -5   21.43    0.19 
   0   4  -5   21.43    0.18 
   0   4  -5   21.46    0.15 
   0   4  -5   21.07    0.16 
   0  -4   5   22.02    0.16 
   0  -4   5   21.75    0.15 
   0  -4   5   21.98    0.16 
   0  -4   5   21.65    0.20 
   0  -4   5   21.22    0.15 
  -1   4  -5    5.72    0.21 
  -1   4  -5    6.57    0.24 
  -1   4  -5    5.37    0.20 
   1  -4   5    6.39    0.22 
   1  -4   5    5.16    0.17 
   1  -4   5    5.95    0.28 
   1  -4   5    5.04    0.18 
  -2   4  -5    5.22    0.21 
  -2   4  -5    5.68    0.21 
  -2   4  -5    5.46    0.23 
   2  -4   5    5.37    0.16 
   2  -4   5    5.36    0.16 
   2  -4   5    4.47    0.21 
   2  -4   5    4.85    0.24 
   2  -4   5    5.52    0.16 
   2  -4   5    6.08    0.26 
  -3   4  -5   19.93    0.23 
  -3   4  -5   19.65    0.23 
   3  -4   5   19.56    0.27 
   3  -4   5   20.58    0.30 
  -4   4  -5    0.22    0.18 
  -4   4  -5    0.65    0.16 
   4  -4   5    0.25    0.21 
   4  -4   5    0.07    0.22 
   4  -4   5   -0.07    0.22 
  -5   4  -5    0.87    0.24 
  -5   4  -5    0.06    0.19 
   5  -4   5    1.15    0.29 
   5  -4   5    0.05    0.26 
  -6   4  -5    1.02    0.21 
  -6   4  -5    1.13    0.25 
   6  -4   5    1.05    0.31 
   8   3  -5    0.70    0.29 
   8   3  -5    0.90    0.22 
  -8  -3   5    0.69    0.20 
   7   3  -5    0.03    0.18 
   7   3  -5   -0.12    0.24 
  -7  -3   5   -0.19    0.17 
   6   3  -5    8.88    0.32 
   6   3  -5    8.29    0.23 
   6   3  -5    9.13    0.22 
  -6  -3   5    8.26    0.23 
  -6  -3   5    9.08    0.20 
   5   3  -5    0.29    0.14 
   5   3  -5    0.36    0.13 
   5   3  -5    0.38    0.23 
   5   3  -5    0.72    0.16 
  -5  -3   5    0.37    0.14 
  -5  -3   5    0.45    0.15 
   4   3  -5    0.31    0.18 
   4   3  -5   -0.01    0.11 
   4   3  -5    0.14    0.13 
   4   3  -5    0.25    0.11 
  -4  -3   5    0.30    0.11 
  -4  -3   5    0.57    0.11 
  -4  -3   5    0.27    0.13 
   3   3  -5    8.79    0.18 
   3   3  -5    9.59    0.16 
   3   3  -5    9.05    0.15 
   3   3  -5   10.01    0.17 
   3   3  -5    8.52    0.20 
   3   3  -5    9.23    0.14 
  -3  -3   5    9.73    0.16 
  -3  -3   5    9.41    0.16 
  -3  -3   5    9.25    0.19 
  -3  -3   5    8.45    0.18 
  -3  -3   5    9.14    0.14 
  -3  -3   5    9.44    0.15 
   2   3  -5  133.91    1.39 
   2   3  -5  131.44    1.38 
   2   3  -5  134.36    1.39 
   2   3  -5  134.03    1.44 
   2   3  -5  131.54    1.39 
   2   3  -5  132.31    1.38 
   2   3  -5  132.89    1.41 
  -2  -3   5  133.76    1.39 
  -2  -3   5  133.87    1.38 
  -2  -3   5  132.31    1.42 
  -2  -3   5  130.17    1.38 
  -2  -3   5  131.61    1.39 
  -2  -3   5  132.82    1.41 
   1   3  -5  210.91    1.94 
   1   3  -5  210.34    1.96 
   1   3  -5  212.15    1.95 
   1   3  -5  209.81    1.93 
   1   3  -5  211.98    1.94 
  -1  -3   5  210.64    1.94 
  -1  -3   5  210.56    1.97 
  -1  -3   5  211.06    1.96 
  -1  -3   5  210.38    1.94 
  -1  -3   5  210.69    1.94 
  -1  -3   5  211.16    1.94 
   0   3  -5    8.41    0.17 
   0   3  -5    9.08    0.17 
   0   3  -5    8.69    0.15 
   0   3  -5    9.26    0.13 
   0   3  -5    8.20    0.12 
   0   3  -5    8.81    0.12 
   0   3  -5    8.53    0.11 
   0   3  -5    8.63    0.12 
   0  -3   5    9.02    0.13 
   0  -3   5    8.51    0.17 
   0  -3   5    9.54    0.14 
   0  -3   5    8.31    0.12 
   0  -3   5    8.55    0.13 
   0  -3   5    8.56    0.12 
  -1   3  -5    0.45    0.10 
  -1   3  -5    0.59    0.05 
  -1   3  -5    0.20    0.09 
  -1   3  -5    0.53    0.11 
  -1   3  -5    0.41    0.04 
   1  -3   5    0.53    0.06 
   1  -3   5    0.47    0.13 
   1  -3   5    0.43    0.09 
   1  -3   5    0.76    0.05 
   1  -3   5    0.54    0.06 
   1  -3   5    0.55    0.07 
   1  -3   5    0.39    0.08 
  -2   3  -5    7.79    0.18 
  -2   3  -5    7.97    0.18 
  -2   3  -5    7.74    0.18 
   2  -3   5    8.10    0.13 
   2  -3   5    7.98    0.13 
   2  -3   5    8.27    0.24 
   2  -3   5    7.13    0.17 
   2  -3   5    7.78    0.12 
   2  -3   5    7.39    0.16 
  -3   3  -5   18.85    0.21 
  -3   3  -5   19.61    0.21 
   3  -3   5   20.11    0.32 
   3  -3   5   18.84    0.25 
   3  -3   5   19.68    0.23 
  -4   3  -5    3.07    0.18 
  -4   3  -5    2.95    0.15 
   4  -3   5    2.93    0.20 
   4  -3   5    3.09    0.19 
  -5   3  -5    3.20    0.19 
  -5   3  -5    3.81    0.17 
   5  -3   5    3.09    0.23 
   5  -3   5    3.45    0.27 
  -6   3  -5    0.14    0.21 
  -6   3  -5   -0.20    0.18 
   6  -3   5    0.40    0.27 
   8   2  -5    0.45    0.20 
   8   2  -5    0.85    0.28 
  -8  -2   5    0.39    0.18 
   7   2  -5    1.32    0.23 
   7   2  -5    0.11    0.33 
   7   2  -5    1.30    0.18 
  -7  -2   5    1.13    0.18 
   6   2  -5    0.53    0.28 
   6   2  -5    0.33    0.20 
   6   2  -5    0.67    0.16 
  -6  -2   5    0.83    0.15 
   5   2  -5   13.18    0.26 
   5   2  -5   13.35    0.27 
   5   2  -5   11.62    0.30 
   5   2  -5   12.27    0.25 
  -5  -2   5   13.97    0.26 
  -5  -2   5   12.49    0.25 
   4   2  -5    9.49    0.24 
   4   2  -5   10.51    0.24 
   4   2  -5   10.55    0.36 
   4   2  -5   10.57    0.24 
  -4  -2   5   10.40    0.26 
  -4  -2   5   10.17    0.24 
  -4  -2   5   10.28    0.24 
  -4  -2   5    9.93    0.22 
   3   2  -5    4.97    0.10 
   3   2  -5    4.86    0.09 
  -3  -2   5    5.10    0.10 
  -3  -2   5    5.45    0.11 
  -3  -2   5    5.29    0.15 
  -3  -2   5    5.07    0.12 
  -3  -2   5    5.23    0.15 
   2   2  -5   50.50    0.70 
   2   2  -5   48.50    0.70 
   2   2  -5   48.32    0.75 
   2   2  -5   47.34    0.71 
   2   2  -5   47.00    0.69 
   2   2  -5   47.40    0.72 
   2   2  -5   48.96    0.70 
  -2  -2   5   48.36    0.70 
  -2  -2   5   49.35    0.70 
  -2  -2   5   47.92    0.70 
  -2  -2   5   48.17    0.72 
  -2  -2   5   47.93    0.74 
  -2  -2   5   49.00    0.70 
   1   2  -5  114.11    1.73 
   1   2  -5  113.93    1.74 
   1   2  -5  114.77    1.73 
   1   2  -5  107.93    1.72 
   1   2  -5  115.89    1.73 
  -1  -2   5  114.08    1.72 
  -1  -2   5  113.72    1.75 
  -1  -2   5  112.94    1.72 
  -1  -2   5  113.07    1.74 
  -1  -2   5  115.18    1.73 
  -1  -2   5  114.00    1.73 
  -1  -2   5  114.01    1.73 
   0   2  -5   41.77    0.56 
   0   2  -5   41.00    0.58 
   0   2  -5   42.06    0.55 
   0   2  -5   42.43    0.57 
   0   2  -5   42.23    0.55 
   0   2  -5   41.56    0.55 
   0   2  -5   42.44    0.55 
   0   2  -5   42.68    0.55 
   0  -2   5   42.35    0.55 
   0  -2   5   41.75    0.55 
   0  -2   5   42.16    0.55 
   0  -2   5   41.79    0.58 
   0  -2   5   41.60    0.56 
   0  -2   5   41.99    0.55 
  -1   2  -5   15.17    0.49 
  -1   2  -5   14.81    0.47 
  -1   2  -5   16.57    0.45 
  -1   2  -5   15.10    0.46 
  -1   2  -5   14.60    0.47 
  -1   2  -5   14.20    0.45 
   1  -2   5   16.09    0.46 
   1  -2   5   14.36    0.45 
   1  -2   5   14.33    0.50 
   1  -2   5   15.60    0.49 
   1  -2   5   15.11    0.47 
  -2   2  -5    3.79    0.16 
  -2   2  -5    3.88    0.16 
  -2   2  -5    3.39    0.15 
   2  -2   5    3.68    0.19 
   2  -2   5    3.31    0.16 
   2  -2   5    4.01    0.12 
   2  -2   5    3.51    0.15 
   2  -2   5    4.25    0.13 
   2  -2   5    4.15    0.13 
  -3   2  -5    5.42    0.11 
  -3   2  -5    5.72    0.10 
   3  -2   5    6.10    0.14 
   3  -2   5    5.75    0.09 
   3  -2   5    5.79    0.06 
   3  -2   5    5.92    0.13 
   3  -2   5    5.79    0.04 
   3  -2   5    6.02    0.05 
   3  -2   5    5.66    0.03 
  -4   2  -5    4.88    0.17 
  -4   2  -5    5.30    0.15 
   4  -2   5    5.32    0.09 
   4  -2   5    5.98    0.11 
   4  -2   5    5.71    0.20 
   4  -2   5    5.81    0.21 
   4  -2   5    5.00    0.09 
   4  -2   5    5.77    0.10 
  -5   2  -5    5.33    0.16 
  -5   2  -5    4.77    0.19 
   5  -2   5    4.84    0.10 
   5  -2   5    4.80    0.23 
   5  -2   5    5.17    0.11 
   5  -2   5    4.83    0.26 
   5  -2   5    4.90    0.12 
  -6   2  -5    0.52    0.22 
  -6   2  -5    0.37    0.16 
   6  -2   5    0.19    0.13 
   6  -2   5    0.44    0.26 
  -7   2  -5    0.14    0.23 
  -7   2  -5    0.19    0.19 
   7  -2   5    0.92    0.33 
   8   1  -5    0.49    0.22 
   8   1  -5    0.95    0.31 
  -8  -1   5    1.23    0.19 
   7   1  -5    0.44    0.16 
   7   1  -5   -0.46    0.33 
   7   1  -5    0.38    0.24 
  -7  -1   5    0.53    0.15 
   6   1  -5    9.06    0.19 
   6   1  -5    8.48    0.30 
   6   1  -5    8.38    0.20 
  -6  -1   5    8.87    0.17 
   5   1  -5   22.01    0.46 
   5   1  -5   22.82    0.33 
   5   1  -5   21.99    0.32 
   5   1  -5   21.98    0.32 
  -5  -1   5   22.67    0.31 
  -5  -1   5   22.32    0.30 
   4   1  -5   63.43    0.65 
   4   1  -5   63.37    0.65 
   4   1  -5   62.63    0.73 
   4   1  -5   63.06    0.65 
  -4  -1   5   63.77    0.65 
  -4  -1   5   63.33    0.65 
  -4  -1   5   63.46    0.65 
  -4  -1   5   62.74    0.65 
   3   1  -5   83.27    1.05 
   3   1  -5   82.95    1.02 
   3   1  -5   84.46    1.00 
   3   1  -5   82.85    0.99 
   3   1  -5   83.83    1.00 
   3   1  -5   82.41    0.99 
  -3  -1   5   82.52    0.99 
  -3  -1   5   83.39    1.00 
  -3  -1   5   82.30    1.02 
  -3  -1   5   81.07    1.04 
  -3  -1   5   82.49    0.99 
  -3  -1   5   83.27    1.00 
   2   1  -5    0.47    0.09 
   2   1  -5    0.48    0.09 
   2   1  -5    0.58    0.11 
   2   1  -5    0.77    0.12 
   2   1  -5    0.58    0.08 
   2   1  -5    0.53    0.10 
  -2  -1   5    0.61    0.10 
  -2  -1   5    0.44    0.08 
  -2  -1   5    0.42    0.09 
  -2  -1   5    0.82    0.12 
  -2  -1   5    0.58    0.12 
  -2  -1   5    0.51    0.09 
   1   1  -5   10.75    0.11 
   1   1  -5   10.35    0.14 
   1   1  -5   10.37    0.12 
   1   1  -5   10.40    0.11 
   1   1  -5   10.35    0.13 
   1   1  -5   10.31    0.11 
   1   1  -5   10.61    0.11 
  -1  -1   5   10.47    0.11 
  -1  -1   5   10.42    0.13 
  -1  -1   5   10.52    0.11 
  -1  -1   5   10.53    0.11 
  -1  -1   5   10.46    0.12 
  -1  -1   5   10.72    0.11 
  -1  -1   5   10.49    0.14 
   0   1  -5    5.95    0.12 
   0   1  -5    6.17    0.09 
   0   1  -5    5.73    0.09 
   0   1  -5    6.18    0.08 
   0  -1   5    6.38    0.11 
   0  -1   5    5.89    0.09 
   0  -1   5    6.16    0.13 
   0  -1   5    5.82    0.09 
  -1   1  -5   30.21    0.50 
  -1   1  -5   30.36    0.49 
  -1   1  -5   29.05    0.49 
  -1   1  -5   30.18    0.50 
  -1   1  -5   29.08    0.50 
  -1   1  -5   29.22    0.48 
  -1   1  -5   30.44    0.53 
   1  -1   5   29.80    0.52 
   1  -1   5   29.33    0.49 
   1  -1   5   30.12    0.49 
   1  -1   5   29.89    0.49 
   1  -1   5   29.61    0.53 
   1  -1   5   29.49    0.49 
  -2   1  -5    3.93    0.24 
  -2   1  -5    5.01    0.26 
   2  -1   5    4.11    0.23 
   2  -1   5    4.64    0.31 
   2  -1   5    4.60    0.25 
   2  -1   5    5.00    0.23 
  -3   1  -5    5.46    0.17 
   3  -1   5    5.99    0.18 
   3  -1   5    6.39    0.15 
   3  -1   5    6.40    0.24 
   3  -1   5    6.89    0.16 
  -4   1  -5    0.35    0.12 
  -4   1  -5    0.48    0.14 
   4  -1   5    0.43    0.16 
   4  -1   5    0.45    0.18 
   4  -1   5    0.87    0.08 
   4  -1   5    0.79    0.12 
   4  -1   5    0.68    0.07 
   4  -1   5    0.85    0.10 
  -5   1  -5    6.46    0.15 
  -5   1  -5    6.40    0.20 
   5  -1   5    6.58    0.13 
   5  -1   5    6.69    0.26 
   5  -1   5    6.71    0.14 
   5  -1   5    6.69    0.11 
   5  -1   5    6.36    0.22 
   5  -1   5    7.14    0.11 
  -6   1  -5    8.70    0.18 
  -6   1  -5    7.96    0.22 
   6  -1   5    7.95    0.18 
   6  -1   5    8.75    0.33 
   6  -1   5    7.87    0.28 
  -7   1  -5    0.32    0.20 
  -7   1  -5    0.31    0.23 
   7  -1   5    0.70    0.33 
   7  -1   5    0.02    0.16 
   8   0  -5    2.28    0.23 
  -8   0   5    2.27    0.19 
   7   0  -5    3.58    0.20 
   7   0  -5    3.25    0.24 
   7   0  -5    2.34    0.35 
  -7   0   5    3.27    0.17 
   6   0  -5   -0.20    0.18 
   6   0  -5    0.01    0.14 
   6   0  -5    0.03    0.28 
  -6   0   5   -0.16    0.13 
   5   0  -5    3.20    0.15 
   5   0  -5    4.35    0.16 
   5   0  -5    3.61    0.25 
  -5   0   5    4.13    0.13 
  -5   0   5    3.34    0.15 
  -5   0   5    4.18    0.15 
   4   0  -5   32.46    0.58 
   4   0  -5   32.39    0.49 
   4   0  -5   33.70    0.49 
  -4   0   5   32.76    0.48 
  -4   0   5   32.66    0.48 
   3   0  -5   26.43    0.30 
   3   0  -5   26.55    0.29 
   3   0  -5   27.78    0.40 
   3   0  -5   26.80    0.33 
   3   0  -5   27.00    0.30 
  -3   0   5   25.73    0.35 
  -3   0   5   26.35    0.30 
  -3   0   5   26.09    0.29 
  -3   0   5   25.87    0.33 
  -3   0   5   26.58    0.29 
  -3   0   5   26.57    0.29 
   2   0  -5   40.35    0.47 
   2   0  -5   39.67    0.48 
   2   0  -5   39.81    0.49 
   2   0  -5   40.22    0.53 
   2   0  -5   40.74    0.47 
   2   0  -5   39.86    0.47 
  -2   0   5   40.47    0.47 
  -2   0   5   40.98    0.48 
  -2   0   5   39.85    0.47 
  -2   0   5   39.90    0.51 
  -2   0   5   39.79    0.47 
  -2   0   5   39.70    0.49 
   1   0  -5    7.81    0.10 
   1   0  -5    7.74    0.14 
   1   0  -5    7.46    0.11 
   1   0  -5    7.86    0.11 
   1   0  -5    7.77    0.11 
   1   0  -5    7.83    0.12 
   1   0  -5    8.17    0.11 
  -1   0   5    7.72    0.10 
  -1   0   5    7.89    0.11 
  -1   0   5    7.83    0.10 
  -1   0   5    7.73    0.12 
  -1   0   5    7.83    0.13 
  -1   0   5    7.46    0.11 
   0   0  -5   15.26    0.24 
   0   0  -5   16.29    0.25 
   0   0  -5   15.80    0.20 
   0   0  -5   15.28    0.20 
   0   0  -5   15.88    0.25 
   0   0  -5   15.26    0.20 
   0   0   5   15.82    0.20 
   0   0   5   16.24    0.24 
   0   0   5   15.37    0.20 
   0   0   5   15.39    0.20 
   0   0   5   15.71    0.21 
   0   0   5   16.20    0.25 
   0   0   5   16.13    0.23 
  -1   0  -5    2.35    0.08 
  -1   0  -5    2.26    0.08 
  -1   0  -5    2.39    0.08 
  -1   0  -5    2.10    0.09 
  -1   0  -5    2.02    0.10 
   1   0   5    2.22    0.08 
   1   0   5    2.29    0.12 
   1   0   5    2.35    0.08 
   1   0   5    2.29    0.11 
   1   0   5    2.24    0.08 
   1   0   5    2.24    0.08 
  -2   0  -5   38.05    0.26 
  -2   0  -5   39.42    0.29 
  -2   0  -5   39.71    0.34 
  -2   0  -5   38.55    0.27 
  -2   0  -5   39.42    0.28 
  -2   0  -5   38.48    0.30 
  -2   0  -5   38.30    0.27 
   2   0   5   40.34    0.35 
   2   0   5   39.26    0.28 
   2   0   5   40.04    0.28 
   2   0   5   38.58    0.28 
   2   0   5   39.61    0.28 
  -3   0  -5    0.81    0.06 
  -3   0  -5    0.58    0.11 
  -3   0  -5    1.21    0.06 
  -3   0  -5    0.98    0.09 
   3   0   5    1.22    0.13 
   3   0   5    1.02    0.08 
   3   0   5    0.86    0.05 
   3   0   5    1.14    0.10 
   3   0   5    0.84    0.06 
   3   0   5    1.29    0.06 
   3   0   5    0.94    0.08 
  -4   0  -5    4.31    0.06 
  -4   0  -5    4.21    0.13 
  -4   0  -5    4.79    0.11 
   4   0   5    4.39    0.14 
   4   0   5    4.39    0.10 
   4   0   5    4.38    0.08 
   4   0   5    4.74    0.08 
   4   0   5    4.79    0.07 
   4   0   5    4.28    0.15 
   4   0   5    4.46    0.11 
  -5   0  -5    0.59    0.16 
  -5   0  -5    0.87    0.12 
   5   0   5    1.15    0.14 
   5   0   5    0.84    0.08 
   5   0   5    1.08    0.23 
   5   0   5    0.84    0.12 
   5   0   5    0.94    0.14 
   5   0   5    0.62    0.18 
   5   0   5    0.57    0.09 
  -6   0  -5   10.10    0.23 
  -6   0  -5   10.55    0.18 
   6   0   5   11.10    0.18 
   6   0   5   11.27    0.22 
   6   0   5   10.86    0.32 
   6   0   5   10.29    0.17 
   6   0   5    9.94    0.25 
  -7   0  -5    3.79    0.24 
   7  -1  -5    7.39    0.28 
   7  -1  -5    6.72    0.38 
   7  -1  -5    7.28    0.22 
  -7   1   5    7.20    0.21 
   6  -1  -5    4.29    0.20 
   6  -1  -5    3.79    0.16 
   6  -1  -5    3.60    0.30 
  -6   1   5    3.87    0.17 
  -6   1   5    3.78    0.14 
   5  -1  -5    6.07    0.18 
   5  -1  -5    5.62    0.15 
   5  -1  -5    5.31    0.26 
  -5   1   5    5.41    0.11 
  -5   1   5    5.68    0.14 
  -5   1   5    5.65    0.16 
   4  -1  -5    0.74    0.19 
   4  -1  -5    0.57    0.10 
   4  -1  -5    0.45    0.12 
   4  -1  -5    0.63    0.15 
  -4   1   5    0.40    0.10 
  -4   1   5    0.86    0.10 
  -4   1   5    0.93    0.10 
   3  -1  -5   25.14    0.38 
   3  -1  -5   25.78    0.39 
   3  -1  -5   25.13    0.39 
   3  -1  -5   25.78    0.41 
   3  -1  -5   25.59    0.39 
   3  -1  -5   26.71    0.48 
  -3   1   5   25.65    0.38 
  -3   1   5   25.27    0.45 
  -3   1   5   25.95    0.38 
  -3   1   5   25.37    0.38 
   2  -1  -5    0.79    0.08 
   2  -1  -5    0.42    0.12 
   2  -1  -5    0.54    0.09 
   2  -1  -5    0.48    0.08 
   2  -1  -5    0.57    0.10 
   2  -1  -5    0.21    0.09 
  -2   1   5    0.27    0.09 
  -2   1   5    0.43    0.10 
  -2   1   5    0.42    0.11 
  -2   1   5    0.37    0.07 
  -2   1   5    0.26    0.08 
  -2   1   5    0.52    0.08 
   1  -1  -5    6.80    0.10 
   1  -1  -5    7.07    0.10 
   1  -1  -5    7.05    0.10 
   1  -1  -5    6.69    0.11 
   1  -1  -5    6.96    0.14 
   1  -1  -5    7.03    0.11 
   1  -1  -5    6.96    0.10 
  -1   1   5    7.10    0.13 
  -1   1   5    7.16    0.10 
  -1   1   5    6.98    0.11 
  -1   1   5    6.67    0.09 
  -1   1   5    7.11    0.10 
  -1   1   5    7.11    0.12 
   0  -1  -5   66.57    0.78 
   0  -1  -5   64.46    0.78 
   0  -1  -5   67.00    0.80 
   0  -1  -5   67.40    0.81 
   0  -1  -5   66.84    0.78 
   0  -1  -5   65.71    0.78 
   0  -1  -5   67.11    0.80 
   0   1   5   66.52    0.78 
   0   1   5   66.72    0.79 
   0   1   5   67.27    0.81 
   0   1   5   67.05    0.80 
   0   1   5   66.37    0.78 
   0   1   5   65.26    0.78 
   0   1   5   66.31    0.78 
  -1  -1  -5    4.21    0.07 
  -1  -1  -5    4.23    0.08 
  -1  -1  -5    4.36    0.06 
  -1  -1  -5    4.29    0.10 
  -1  -1  -5    4.40    0.08 
  -1  -1  -5    3.97    0.06 
   1   1   5    4.45    0.08 
   1   1   5    4.21    0.07 
   1   1   5    4.26    0.08 
   1   1   5    4.18    0.11 
   1   1   5    4.38    0.07 
   1   1   5    4.38    0.11 
  -2  -1  -5    2.30    0.09 
  -2  -1  -5    2.19    0.12 
  -2  -1  -5    2.13    0.08 
  -2  -1  -5    2.26    0.09 
  -2  -1  -5    2.26    0.08 
   2   1   5    2.13    0.08 
   2   1   5    2.20    0.09 
   2   1   5    2.27    0.09 
   2   1   5    2.48    0.13 
   2   1   5    2.25    0.07 
   2   1   5    2.49    0.10 
  -3  -1  -5   27.70    0.51 
  -3  -1  -5   29.53    0.51 
  -3  -1  -5   28.89    0.50 
  -3  -1  -5   28.29    0.50 
  -3  -1  -5   27.81    0.50 
  -3  -1  -5   26.87    0.52 
   3   1   5   28.55    0.51 
   3   1   5   28.12    0.50 
   3   1   5   29.66    0.58 
   3   1   5   28.29    0.52 
   3   1   5   28.42    0.51 
   3   1   5   27.78    0.51 
   3   1   5   28.25    0.51 
  -4  -1  -5   19.70    0.29 
  -4  -1  -5   19.54    0.32 
  -4  -1  -5   20.20    0.29 
   4   1   5   19.89    0.30 
   4   1   5   19.35    0.30 
   4   1   5   19.26    0.33 
   4   1   5   19.18    0.40 
   4   1   5   19.69    0.29 
   4   1   5   20.81    0.29 
   4   1   5   20.26    0.28 
  -5  -1  -5    3.17    0.12 
  -5  -1  -5    3.68    0.18 
  -5  -1  -5    3.72    0.12 
   5   1   5    3.03    0.22 
   5   1   5    4.51    0.12 
   5   1   5    3.29    0.15 
   5   1   5    3.78    0.19 
   5   1   5    3.93    0.11 
   5   1   5    3.47    0.13 
  -6  -1  -5    2.98    0.14 
  -6  -1  -5    2.46    0.20 
   6   1   5    2.67    0.18 
   6   1   5    2.77    0.27 
   6   1   5    2.93    0.22 
   6   1   5    2.84    0.11 
   6   1   5    2.89    0.16 
  -7  -1  -5    9.99    0.29 
  -7  -1  -5   10.05    0.23 
   7   1   5   10.64    0.39 
   7  -2  -5    3.64    0.19 
   7  -2  -5    3.78    0.24 
   7  -2  -5    3.56    0.37 
  -7   2   5    3.09    0.19 
   6  -2  -5   10.52    0.23 
   6  -2  -5    9.69    0.37 
   6  -2  -5   10.84    0.26 
  -6   2   5   10.59    0.23 
   5  -2  -5    8.92    0.30 
   5  -2  -5    9.39    0.18 
   5  -2  -5    9.15    0.19 
   5  -2  -5    9.19    0.18 
  -5   2   5    9.21    0.18 
  -5   2   5    9.42    0.15 
  -5   2   5    8.46    0.18 
  -5   2   5    9.08    0.13 
   4  -2  -5    0.64    0.14 
   4  -2  -5    0.35    0.10 
   4  -2  -5    0.52    0.20 
   4  -2  -5    0.63    0.13 
   4  -2  -5    1.05    0.12 
  -4   2   5    0.48    0.08 
  -4   2   5    0.81    0.10 
  -4   2   5    0.50    0.11 
   3  -2  -5   21.41    0.30 
   3  -2  -5   21.97    0.41 
   3  -2  -5   21.40    0.29 
   3  -2  -5   20.87    0.30 
   3  -2  -5   21.25    0.32 
   3  -2  -5   20.15    0.30 
  -3   2   5   21.07    0.36 
  -3   2   5   21.71    0.29 
  -3   2   5   21.54    0.29 
  -3   2   5   20.61    0.30 
  -3   2   5   20.24    0.30 
   2  -2  -5   41.14    0.51 
   2  -2  -5   42.78    0.57 
   2  -2  -5   40.94    0.51 
   2  -2  -5   41.51    0.52 
   2  -2  -5   40.06    0.50 
   2  -2  -5   39.91    0.50 
  -2   2   5   40.78    0.50 
  -2   2   5   41.41    0.50 
  -2   2   5   41.74    0.52 
  -2   2   5   41.43    0.50 
  -2   2   5   41.92    0.55 
   1  -2  -5   49.02    0.50 
   1  -2  -5   48.16    0.50 
   1  -2  -5   49.12    0.54 
   1  -2  -5   49.17    0.51 
   1  -2  -5   48.66    0.51 
   1  -2  -5   48.76    0.53 
   1  -2  -5   49.12    0.50 
  -1   2   5   49.33    0.51 
  -1   2   5   49.17    0.53 
  -1   2   5   48.77    0.50 
  -1   2   5   49.01    0.50 
  -1   2   5   48.77    0.50 
  -1   2   5   48.87    0.50 
   0  -2  -5   18.58    0.19 
   0  -2  -5   18.69    0.19 
   0  -2  -5   18.51    0.22 
   0  -2  -5   18.97    0.19 
   0  -2  -5   19.15    0.24 
   0  -2  -5   18.91    0.20 
   0  -2  -5   19.07    0.19 
   0   2   5   19.05    0.21 
   0   2   5   18.82    0.19 
   0   2   5   19.38    0.19 
   0   2   5   18.77    0.21 
   0   2   5   19.24    0.24 
   0   2   5   18.95    0.19 
   0   2   5   18.67    0.19 
  -1  -2  -5   16.22    0.27 
  -1  -2  -5   15.30    0.22 
  -1  -2  -5   16.26    0.22 
  -1  -2  -5   16.21    0.22 
   1   2   5   16.09    0.22 
   1   2   5   15.03    0.22 
   1   2   5   16.02    0.25 
   1   2   5   16.59    0.28 
   1   2   5   16.22    0.22 
  -2  -2  -5    3.43    0.08 
   2   2   5    3.52    0.09 
   2   2   5    3.74    0.08 
   2   2   5    4.12    0.10 
   2   2   5    3.67    0.12 
  -3  -2  -5   14.46    0.29 
  -3  -2  -5   14.82    0.31 
  -3  -2  -5   15.41    0.30 
   3   2   5   13.59    0.29 
   3   2   5   15.70    0.38 
   3   2   5   14.80    0.30 
  -4  -2  -5   55.86    0.62 
  -4  -2  -5   57.56    0.63 
  -4  -2  -5   56.84    0.62 
  -4  -2  -5   56.11    0.64 
  -4  -2  -5   57.57    0.62 
   4   2   5   57.03    0.63 
   4   2   5   55.90    0.63 
   4   2   5   56.95    0.64 
   4   2   5   56.46    0.63 
   4   2   5   57.26    0.71 
   4   2   5   56.36    0.65 
  -5  -2  -5   26.98    0.32 
  -5  -2  -5   26.47    0.36 
  -5  -2  -5   26.57    0.32 
  -5  -2  -5   25.63    0.36 
  -5  -2  -5   26.59    0.33 
   5   2   5   26.95    0.34 
   5   2   5   25.44    0.49 
   5   2   5   25.95    0.40 
   5   2   5   26.31    0.34 
   5   2   5   25.95    0.36 
  -6  -2  -5    5.11    0.17 
  -6  -2  -5    4.88    0.14 
  -6  -2  -5    4.98    0.20 
   6   2   5    5.08    0.27 
   6   2   5    5.15    0.22 
   6   2   5    4.69    0.22 
   6   2   5    5.24    0.13 
  -7  -2  -5   -0.05    0.22 
   7   2   5   -0.06    0.14 
   7   2   5    0.44    0.29 
  -8  -2  -5    0.44    0.25 
   8   2   5    1.27    0.39 
   7  -3  -5   -0.13    0.37 
   7  -3  -5    0.27    0.22 
  -7   3   5    0.38    0.20 
   6  -3  -5    0.43    0.18 
   6  -3  -5    0.74    0.33 
   6  -3  -5    1.17    0.16 
  -6   3   5    1.19    0.18 
   5  -3  -5    4.40    0.15 
   5  -3  -5    4.38    0.16 
   5  -3  -5    4.39    0.14 
   5  -3  -5    4.34    0.27 
  -5   3   5    4.09    0.08 
  -5   3   5    4.10    0.09 
  -5   3   5    3.79    0.15 
  -5   3   5    4.34    0.15 
   4  -3  -5   17.79    0.30 
   4  -3  -5   17.50    0.30 
   4  -3  -5   17.20    0.29 
   4  -3  -5   17.25    0.36 
   4  -3  -5   18.61    0.44 
  -4   3   5   17.46    0.29 
  -4   3   5   17.63    0.28 
  -4   3   5   18.03    0.30 
  -4   3   5   17.60    0.27 
   3  -3  -5    0.12    0.10 
   3  -3  -5   -0.09    0.10 
   3  -3  -5    0.16    0.10 
   3  -3  -5    0.04    0.09 
   3  -3  -5    0.15    0.15 
   3  -3  -5    0.14    0.07 
  -3   3   5    0.05    0.08 
  -3   3   5    0.06    0.08 
  -3   3   5    0.16    0.06 
   2  -3  -5    4.00    0.21 
   2  -3  -5    4.02    0.20 
   2  -3  -5    4.52    0.22 
   2  -3  -5    4.17    0.22 
   2  -3  -5    4.49    0.23 
   2  -3  -5    4.81    0.31 
  -2   3   5    4.39    0.21 
  -2   3   5    3.99    0.20 
  -2   3   5    4.34    0.20 
  -2   3   5    4.48    0.28 
   1  -3  -5   11.26    0.46 
   1  -3  -5   10.44    0.46 
   1  -3  -5   10.47    0.45 
   1  -3  -5   11.10    0.46 
   1  -3  -5   12.03    0.51 
   1  -3  -5   11.03    0.46 
  -1   3   5   11.16    0.46 
  -1   3   5    9.67    0.45 
  -1   3   5   11.76    0.49 
  -1   3   5   11.60    0.46 
  -1   3   5   11.47    0.46 
  -1   3   5   11.24    0.46 
   0  -3  -5    0.72    0.08 
   0  -3  -5    0.92    0.09 
   0  -3  -5    0.64    0.08 
   0  -3  -5    0.70    0.08 
   0  -3  -5    0.76    0.10 
   0  -3  -5    0.55    0.09 
   0  -3  -5    0.77    0.08 
   0   3   5    0.78    0.08 
   0   3   5    1.10    0.10 
   0   3   5    0.64    0.08 
   0   3   5    0.77    0.09 
   0   3   5    0.84    0.10 
   0   3   5    0.92    0.08 
  -1  -3  -5   38.75    0.48 
  -1  -3  -5   39.94    0.49 
  -1  -3  -5   40.59    0.48 
  -1  -3  -5   40.43    0.49 
  -1  -3  -5   40.19    0.49 
  -1  -3  -5   40.58    0.52 
   1   3   5   39.67    0.49 
   1   3   5   40.99    0.52 
   1   3   5   41.15    0.49 
   1   3   5   39.39    0.48 
   1   3   5   40.30    0.48 
  -2  -3  -5    0.74    0.09 
  -2  -3  -5    0.50    0.07 
  -2  -3  -5    0.57    0.09 
  -2  -3  -5    0.76    0.07 
  -2  -3  -5    0.41    0.06 
   2   3   5    0.53    0.07 
   2   3   5    0.72    0.12 
   2   3   5    0.56    0.09 
   2   3   5    0.72    0.08 
   2   3   5    0.59    0.07 
  -3  -3  -5    0.86    0.07 
  -3  -3  -5    0.71    0.07 
  -3  -3  -5    0.68    0.07 
  -3  -3  -5    0.99    0.08 
  -3  -3  -5    0.50    0.09 
   3   3   5    1.03    0.08 
   3   3   5    0.88    0.08 
   3   3   5    0.75    0.13 
   3   3   5    0.76    0.08 
  -4  -3  -5   11.15    0.24 
  -4  -3  -5    9.65    0.20 
  -4  -3  -5   10.07    0.23 
  -4  -3  -5   10.21    0.21 
   4   3   5   10.16    0.21 
   4   3   5   11.99    0.35 
   4   3   5   10.77    0.23 
  -5  -3  -5   26.75    0.35 
  -5  -3  -5   26.20    0.31 
  -5  -3  -5   25.60    0.31 
  -5  -3  -5   27.79    0.34 
  -5  -3  -5   26.28    0.36 
  -5  -3  -5   26.49    0.32 
   5   3   5   26.06    0.38 
   5   3   5   26.98    0.35 
   5   3   5   27.77    0.36 
   5   3   5   28.43    0.49 
   5   3   5   26.68    0.33 
  -6  -3  -5    5.35    0.13 
  -6  -3  -5    4.67    0.20 
  -6  -3  -5    4.96    0.19 
   6   3   5    5.73    0.17 
   6   3   5    5.31    0.22 
   6   3   5    5.36    0.29 
   6   3   5    4.68    0.24 
   6   3   5    5.73    0.21 
  -7  -3  -5   10.95    0.26 
   7   3   5   10.63    0.35 
   7   3   5   11.71    0.24 
  -8  -3  -5    0.03    0.22 
   8   3   5   -0.09    0.23 
   8   3   5    0.30    0.33 
   7  -4  -5    0.88    0.23 
   7  -4  -5   -0.48    0.38 
  -7   4   5    0.02    0.21 
   6  -4  -5    0.09    0.19 
   6  -4  -5    0.34    0.14 
   6  -4  -5   -0.59    0.30 
  -6   4   5    0.29    0.17 
   5  -4  -5    3.43    0.18 
   5  -4  -5    3.61    0.15 
   5  -4  -5    3.83    0.30 
  -5   4   5    4.04    0.18 
   4  -4  -5    1.67    0.11 
   4  -4  -5    1.42    0.13 
   4  -4  -5    2.00    0.13 
   4  -4  -5    1.51    0.21 
   4  -4  -5    1.39    0.15 
  -4   4   5    1.63    0.07 
  -4   4   5    1.57    0.07 
  -4   4   5    1.37    0.10 
  -4   4   5    1.76    0.13 
   3  -4  -5   15.02    0.26 
   3  -4  -5   15.13    0.38 
   3  -4  -5   14.98    0.26 
   3  -4  -5   14.22    0.26 
   3  -4  -5   15.30    0.29 
   3  -4  -5   14.29    0.24 
  -3   4   5   14.83    0.23 
  -3   4   5   15.25    0.26 
  -3   4   5   14.36    0.25 
  -3   4   5   15.01    0.24 
   2  -4  -5   18.57    0.29 
   2  -4  -5   18.87    0.37 
   2  -4  -5   19.39    0.29 
   2  -4  -5   19.59    0.29 
   2  -4  -5   18.67    0.28 
   2  -4  -5   19.75    0.30 
   2  -4  -5   19.34    0.35 
  -2   4   5   19.25    0.28 
  -2   4   5   19.38    0.27 
  -2   4   5   18.64    0.28 
   1  -4  -5    9.63    0.16 
   1  -4  -5    9.94    0.15 
   1  -4  -5    9.82    0.19 
   1  -4  -5   10.36    0.16 
   1  -4  -5    9.38    0.17 
   1  -4  -5   10.06    0.15 
   1  -4  -5    9.87    0.15 
  -1   4   5    9.79    0.15 
  -1   4   5   10.00    0.16 
  -1   4   5    9.86    0.15 
   0  -4  -5   27.46    0.28 
   0  -4  -5   27.62    0.27 
   0  -4  -5   27.69    0.28 
   0  -4  -5   27.53    0.27 
   0  -4  -5   27.66    0.28 
   0  -4  -5   27.16    0.32 
   0  -4  -5   27.38    0.31 
   0   4   5   27.99    0.27 
   0   4   5   28.11    0.27 
   0   4   5   27.74    0.33 
   0   4   5   28.07    0.27 
   0   4   5   27.73    0.28 
   0   4   5   27.81    0.28 
  -1  -4  -5  226.21    2.67 
  -1  -4  -5  226.92    2.68 
  -1  -4  -5  223.38    2.68 
  -1  -4  -5  225.58    2.69 
  -1  -4  -5  223.74    2.70 
  -1  -4  -5  229.26    2.69 
   1   4   5  224.69    2.68 
   1   4   5  224.84    2.68 
   1   4   5  224.14    2.71 
   1   4   5  226.85    2.69 
   1   4   5  225.83    2.69 
  -2  -4  -5  145.55    1.89 
  -2  -4  -5  147.25    1.91 
  -2  -4  -5  143.94    1.89 
  -2  -4  -5  148.15    1.89 
  -2  -4  -5  149.79    1.89 
   2   4   5  148.15    1.89 
   2   4   5  147.44    1.89 
   2   4   5  146.05    1.89 
   2   4   5  147.85    1.89 
   2   4   5  150.12    1.92 
  -3  -4  -5   82.35    0.92 
  -3  -4  -5   84.15    0.92 
  -3  -4  -5   83.92    0.92 
  -3  -4  -5   82.13    0.91 
  -3  -4  -5   85.12    0.91 
  -3  -4  -5   80.95    0.94 
   3   4   5   82.95    0.96 
   3   4   5   82.21    0.91 
   3   4   5   83.26    0.91 
   3   4   5   82.74    0.91 
  -4  -4  -5    2.81    0.12 
  -4  -4  -5    3.49    0.15 
  -4  -4  -5    2.40    0.14 
   4   4   5    2.57    0.13 
   4   4   5    2.79    0.14 
   4   4   5    2.56    0.19 
  -5  -4  -5   12.87    0.25 
  -5  -4  -5   11.99    0.21 
  -5  -4  -5   12.72    0.27 
  -5  -4  -5   13.62    0.26 
  -5  -4  -5   12.92    0.23 
   5   4   5   12.37    0.31 
   5   4   5   13.14    0.26 
   5   4   5   13.11    0.23 
   5   4   5   12.83    0.25 
  -6  -4  -5    8.07    0.18 
  -6  -4  -5    7.45    0.16 
  -6  -4  -5    7.78    0.21 
  -6  -4  -5    7.31    0.21 
   6   4   5    8.59    0.21 
   6   4   5    8.08    0.25 
   6   4   5    7.74    0.31 
  -7  -4  -5    1.10    0.18 
   7   4   5    1.49    0.18 
   7   4   5    1.35    0.28 
  -8  -4  -5    1.74    0.22 
   8   4   5    1.41    0.24 
   8   4   5    1.95    0.34 
   6  -5  -5    2.17    0.20 
   6  -5  -5    1.92    0.36 
  -6   5   5    1.75    0.20 
   5  -5  -5   -0.44    0.15 
   5  -5  -5   -0.14    0.27 
   5  -5  -5   -0.23    0.12 
  -5   5   5    0.28    0.17 
   4  -5  -5   21.03    0.25 
   4  -5  -5   21.54    0.31 
   4  -5  -5   20.91    0.35 
   4  -5  -5   21.05    0.24 
  -4   5   5   22.88    0.26 
  -4   5   5   19.70    0.21 
   3  -5  -5    4.54    0.21 
   3  -5  -5    4.81    0.12 
   3  -5  -5    4.55    0.12 
   3  -5  -5    4.61    0.11 
   3  -5  -5    4.36    0.14 
   3  -5  -5    4.58    0.13 
  -3   5   5    5.00    0.10 
  -3   5   5    4.87    0.13 
  -3   5   5    4.12    0.10 
  -3   5   5    4.98    0.09 
   2  -5  -5   24.84    0.33 
   2  -5  -5   24.61    0.33 
   2  -5  -5   24.44    0.42 
   2  -5  -5   23.68    0.32 
   2  -5  -5   24.42    0.32 
   2  -5  -5   24.35    0.44 
   2  -5  -5   24.70    0.32 
  -2   5   5   24.68    0.31 
  -2   5   5   24.40    0.32 
  -2   5   5   25.21    0.32 
  -2   5   5   25.17    0.33 
   1  -5  -5   25.02    0.27 
   1  -5  -5   25.15    0.35 
   1  -5  -5   25.58    0.27 
   1  -5  -5   25.00    0.33 
   1  -5  -5   25.21    0.28 
   1  -5  -5   24.76    0.27 
   1  -5  -5   24.80    0.27 
  -1   5   5   24.87    0.26 
  -1   5   5   24.23    0.26 
  -1   5   5   25.08    0.27 
  -1   5   5   25.16    0.26 
  -1   5   5   24.86    0.27 
   0  -5  -5    0.38    0.11 
   0  -5  -5    0.63    0.08 
   0  -5  -5    0.64    0.07 
   0  -5  -5    0.67    0.10 
   0  -5  -5    0.63    0.06 
   0  -5  -5    0.50    0.08 
   0  -5  -5    0.42    0.08 
   0   5   5    0.58    0.07 
   0   5   5    0.64    0.09 
   0   5   5    0.68    0.11 
   0   5   5    0.75    0.06 
   0   5   5    0.64    0.07 
   0   5   5    0.81    0.08 
  -1  -5  -5    9.59    0.10 
  -1  -5  -5    9.14    0.10 
  -1  -5  -5    9.41    0.09 
  -1  -5  -5    9.47    0.09 
  -1  -5  -5    9.40    0.07 
  -1  -5  -5    9.52    0.09 
   1   5   5    9.62    0.09 
   1   5   5    9.50    0.09 
   1   5   5    9.35    0.12 
   1   5   5    9.59    0.08 
   1   5   5    9.64    0.10 
   1   5   5    9.75    0.11 
  -2  -5  -5   87.91    1.05 
  -2  -5  -5   86.69    1.05 
  -2  -5  -5   86.36    1.04 
  -2  -5  -5   87.23    1.05 
  -2  -5  -5   86.04    1.07 
   2   5   5   85.79    1.04 
   2   5   5   87.37    1.04 
   2   5   5   85.33    1.03 
   2   5   5   87.42    1.08 
   2   5   5   86.77    1.05 
   2   5   5   85.83    1.05 
  -3  -5  -5   35.68    0.35 
  -3  -5  -5   35.43    0.36 
  -3  -5  -5   35.21    0.39 
  -3  -5  -5   35.15    0.38 
  -3  -5  -5   34.96    0.35 
  -3  -5  -5   35.19    0.36 
   3   5   5   35.20    0.33 
   3   5   5   35.83    0.36 
   3   5   5   35.89    0.36 
   3   5   5   34.96    0.35 
   3   5   5   36.04    0.44 
  -4  -5  -5   11.89    0.18 
  -4  -5  -5   12.63    0.17 
  -4  -5  -5   12.30    0.15 
  -4  -5  -5   12.90    0.18 
   4   5   5   12.96    0.17 
   4   5   5   12.11    0.16 
   4   5   5   12.82    0.17 
   4   5   5   12.49    0.22 
  -5  -5  -5    0.20    0.13 
  -5  -5  -5    0.43    0.09 
  -5  -5  -5    0.51    0.12 
  -5  -5  -5    0.24    0.13 
  -5  -5  -5    0.37    0.07 
   5   5   5    0.41    0.12 
   5   5   5    0.31    0.10 
   5   5   5    0.70    0.22 
   5   5   5    0.28    0.13 
  -6  -5  -5    1.72    0.17 
  -6  -5  -5    1.14    0.11 
  -6  -5  -5    1.67    0.19 
  -6  -5  -5    1.15    0.15 
   6   5   5    1.70    0.26 
   6   5   5    1.67    0.19 
   6   5   5    1.31    0.16 
  -7  -5  -5    5.33    0.18 
  -7  -5  -5    5.67    0.21 
   7   5   5    5.67    0.25 
   7   5   5    5.54    0.32 
  -8  -5  -5    1.70    0.22 
   8   5   5    1.81    0.32 
   8   5   5    1.52    0.19 
   6  -6  -5    4.00    0.20 
   6  -6  -5    3.60    0.39 
  -6   6   5    4.11    0.22 
   5  -6  -5    1.92    0.15 
   5  -6  -5    1.94    0.33 
   5  -6  -5    1.69    0.18 
  -5   6   5    1.58    0.20 
   4  -6  -5    0.21    0.11 
   4  -6  -5    0.22    0.14 
   4  -6  -5    0.68    0.27 
   4  -6  -5    0.29    0.14 
  -4   6   5    0.61    0.16 
  -4   6   5    0.06    0.11 
   3  -6  -5    0.22    0.12 
   3  -6  -5    0.49    0.21 
   3  -6  -5    0.23    0.10 
   3  -6  -5    0.07    0.11 
   3  -6  -5    0.71    0.12 
  -3   6   5    0.28    0.05 
  -3   6   5    0.13    0.11 
   2  -6  -5   16.61    0.37 
   2  -6  -5   15.96    0.25 
   2  -6  -5   16.36    0.24 
   2  -6  -5   16.60    0.24 
   2  -6  -5   16.17    0.23 
   2  -6  -5   16.44    0.25 
  -2   6   5   16.64    0.23 
  -2   6   5   16.49    0.22 
  -2   6   5   16.47    0.24 
  -2   6   5   15.65    0.23 
   1  -6  -5   57.77    0.77 
   1  -6  -5   58.91    0.71 
   1  -6  -5   57.78    0.71 
   1  -6  -5   57.41    0.71 
   1  -6  -5   57.60    0.71 
   1  -6  -5   58.15    0.71 
   1  -6  -5   57.95    0.75 
  -1   6   5   59.10    0.71 
  -1   6   5   57.71    0.70 
  -1   6   5   57.60    0.70 
  -1   6   5   58.98    0.71 
   0  -6  -5   14.97    0.28 
   0  -6  -5   15.02    0.21 
   0  -6  -5   14.64    0.20 
   0  -6  -5   14.54    0.20 
   0  -6  -5   14.75    0.21 
   0  -6  -5   14.40    0.20 
   0   6   5   14.66    0.20 
   0   6   5   14.57    0.19 
   0   6   5   14.31    0.21 
   0   6   5   14.30    0.19 
   0   6   5   13.59    0.19 
  -1  -6  -5    9.30    0.11 
  -1  -6  -5    9.34    0.13 
  -1  -6  -5    9.17    0.12 
  -1  -6  -5    9.40    0.13 
  -1  -6  -5    8.93    0.14 
   1   6   5    9.76    0.13 
   1   6   5    9.46    0.10 
   1   6   5    9.67    0.14 
   1   6   5    9.05    0.11 
   1   6   5    9.39    0.12 
   1   6   5    9.20    0.16 
  -2  -6  -5    4.27    0.16 
  -2  -6  -5    3.54    0.13 
  -2  -6  -5    4.19    0.16 
  -2  -6  -5    3.22    0.14 
   2   6   5    3.47    0.17 
   2   6   5    4.20    0.16 
   2   6   5    4.07    0.14 
   2   6   5    3.62    0.13 
   2   6   5    3.98    0.15 
   2   6   5    4.05    0.13 
  -3  -6  -5    4.03    0.14 
  -3  -6  -5    3.81    0.11 
  -3  -6  -5    4.18    0.14 
  -3  -6  -5    3.73    0.11 
  -3  -6  -5    4.36    0.15 
   3   6   5    4.36    0.17 
   3   6   5    3.96    0.12 
   3   6   5    4.31    0.14 
   3   6   5    4.60    0.11 
  -4  -6  -5   12.75    0.15 
  -4  -6  -5   12.90    0.17 
  -4  -6  -5   13.17    0.18 
   4   6   5   13.18    0.17 
   4   6   5   12.73    0.16 
   4   6   5   13.16    0.23 
  -5  -6  -5    3.44    0.15 
  -5  -6  -5    4.14    0.15 
  -5  -6  -5    3.72    0.15 
   5   6   5    3.79    0.24 
   5   6   5    4.41    0.15 
   5   6   5    4.03    0.17 
   5   6   5    3.74    0.14 
  -6  -6  -5   -0.28    0.15 
  -6  -6  -5   -0.03    0.14 
   6   6   5   -0.03    0.22 
   6   6   5   -0.02    0.13 
   6   6   5   -0.15    0.27 
  -7  -6  -5    0.23    0.19 
  -7  -6  -5    0.08    0.17 
   7   6   5    0.07    0.16 
  -8  -6  -5    0.75    0.19 
   8   6   5    0.77    0.34 
   8   6   5    0.48    0.20 
   5  -7  -5    5.23    0.37 
   5  -7  -5    5.05    0.21 
  -5   7   5    5.62    0.27 
   4  -7  -5   11.18    0.26 
   4  -7  -5   11.43    0.25 
   4  -7  -5   12.74    0.44 
  -4   7   5   12.43    0.29 
   3  -7  -5    9.01    0.17 
   3  -7  -5    9.49    0.17 
   3  -7  -5    9.20    0.29 
   3  -7  -5    9.29    0.17 
  -3   7   5    9.24    0.19 
   2  -7  -5    1.88    0.19 
   2  -7  -5    2.05    0.10 
   2  -7  -5    1.47    0.11 
   2  -7  -5    1.76    0.10 
  -2   7   5    1.62    0.10 
  -2   7   5    1.95    0.06 
  -2   7   5    1.90    0.07 
  -2   7   5    1.76    0.07 
   1  -7  -5   38.47    0.44 
   1  -7  -5   39.13    0.47 
   1  -7  -5   39.71    0.38 
   1  -7  -5   38.61    0.37 
   1  -7  -5   39.54    0.38 
  -1   7   5   39.92    0.37 
  -1   7   5   39.76    0.36 
  -1   7   5   38.89    0.37 
  -1   7   5   39.44    0.37 
   0  -7  -5   94.38    1.23 
   0  -7  -5   94.11    1.23 
   0  -7  -5   93.61    1.26 
   0  -7  -5   97.03    1.28 
   0  -7  -5   95.57    1.23 
   0  -7  -5   96.12    1.24 
   0   7   5   95.98    1.23 
   0   7   5   95.25    1.23 
   0   7   5   95.92    1.23 
  -1  -7  -5   26.20    0.31 
  -1  -7  -5   26.86    0.32 
  -1  -7  -5   26.43    0.31 
  -1  -7  -5   26.09    0.36 
  -1  -7  -5   26.75    0.32 
   1   7   5   27.13    0.32 
   1   7   5   26.65    0.31 
   1   7   5   26.29    0.32 
   1   7   5   27.12    0.39 
   1   7   5   26.61    0.31 
   1   7   5   27.17    0.30 
  -2  -7  -5    1.25    0.12 
  -2  -7  -5    0.59    0.09 
  -2  -7  -5    0.57    0.10 
  -2  -7  -5    0.90    0.11 
   2   7   5    1.37    0.12 
   2   7   5    0.78    0.09 
   2   7   5    1.05    0.12 
   2   7   5    1.15    0.08 
   2   7   5    0.66    0.14 
   2   7   5    1.17    0.10 
   2   7   5    0.79    0.10 
  -3  -7  -5   11.42    0.16 
  -3  -7  -5   11.69    0.16 
  -3  -7  -5   11.18    0.15 
  -3  -7  -5   10.98    0.13 
   3   7   5   11.64    0.16 
   3   7   5   11.63    0.17 
   3   7   5   11.62    0.20 
   3   7   5   11.74    0.13 
   3   7   5   11.29    0.14 
  -4  -7  -5    5.12    0.13 
  -4  -7  -5    4.56    0.18 
  -4  -7  -5    5.83    0.17 
  -4  -7  -5    5.31    0.17 
   4   7   5    5.42    0.15 
   4   7   5    6.01    0.22 
   4   7   5    5.98    0.17 
   4   7   5    5.47    0.13 
  -5  -7  -5    1.46    0.16 
  -5  -7  -5    1.76    0.15 
  -5  -7  -5    1.15    0.15 
   5   7   5    1.51    0.13 
   5   7   5    1.71    0.21 
   5   7   5    1.66    0.14 
   5   7   5    1.58    0.16 
  -6  -7  -5    2.52    0.19 
  -6  -7  -5    2.02    0.16 
   6   7   5    1.72    0.29 
   6   7   5    2.15    0.21 
   6   7   5    2.41    0.17 
  -7  -7  -5    0.33    0.20 
  -7  -7  -5    0.29    0.18 
   7   7   5    0.23    0.19 
  -8  -7  -5    0.12    0.20 
  -8  -7  -5    0.36    0.22 
   8   7   5    0.37    0.22 
   8   7   5    0.06    0.33 
   5  -8  -5    0.90    0.37 
   5  -8  -5    0.94    0.17 
  -5   8   5    0.69    0.23 
   4  -8  -5    2.33    0.18 
   4  -8  -5    1.91    0.17 
   4  -8  -5    2.05    0.35 
  -4   8   5    2.38    0.23 
   3  -8  -5    7.61    0.19 
   3  -8  -5    7.70    0.33 
   3  -8  -5    7.93    0.20 
  -3   8   5    7.48    0.22 
   2  -8  -5    6.28    0.15 
   2  -8  -5    6.12    0.16 
   2  -8  -5    6.28    0.26 
   2  -8  -5    6.37    0.15 
  -2   8   5    6.09    0.10 
  -2   8   5    5.55    0.10 
  -2   8   5    6.27    0.10 
  -2   8   5    6.50    0.18
[truncated: 468,419 more chars]
