# Supplementary material for: Iron(III) Complexes with Non-Steroidal Anti-Inflammatory Drugs: Structure, Antioxidant and Anticholinergic Activity, and Interaction with Biomolecules
Source: Int J Mol Sci. 2023 Mar 28;24(7):6391. doi: 10.3390/ijms24076391 (PMC10094617; doi:10.3390/ijms24076391)
Supplement: Supplementary file 1 [file ijms-24-06391-s001.zip › Cif of 2.cif]

data_global 
_audit_creation_date        "2023-02-22"
_audit_creation_method CRYSTALS_ver_14.61_build_6236 

_oxford_structure_analysis_title  'ps_fd663A_0m in P-1'
_chemical_name_systematic         ?
_chemical_melting_point           ?

#looking for refcif 
 
 
# Check this file using the IUCr facility at: 
# http://checkcif.iucr.org/ 
 
# The content below is held in the file 'script/refcif.dat'. This is a text 
# file which you may edit to reflect local conditions. 
# Items which need looking at are represented by a '?'. 
# Items for which there are choices are prefixed with 'choose from'. 
 
_publ_contact_letter 
; 
 Please consider this CIF submission for 
 publication as a Short Format Paper in Acta 
 Crystallographica E. 
; 
_publ_contact_author_name         'Anthony Other' 
_publ_contact_author_address 
; 
 Chemical Crystallography Laboratory, 
 Department of Chemistry, 
 University of Nowhere, 
 Nowhere, NO1 4T, UK. 
; 
 
_publ_contact_author_phone        '+44 1865 000000' 
_publ_contact_author_fax          '+44 1865 000000' 
_publ_contact_author_email        'a.n.other@chem.no.ac.uk' 
_publ_requested_journal           'Section E' 
_publ_requested_category          EO # choose from: FI FM FO CI CM CO AD 
_publ_requested_coeditor_name     'Prof William Clegg' 
 
_publ_section_title 
# Title of paper - generally just the systematic or trivial name 
; ? 
; 
 
# The loop structure below should contain the names and addresses of all 
# authors, in the required order of publication. Repeat as necessary. 
loop_ 
 _publ_author_name 
 _publ_author_address 
 _publ_author_footnote 
 'Other, Anthony N.' # Author 1 
; 
 ? # Address for author 1 
; 
; 
 ? # Footnote for author 1 
; 
 'Else, S. O.' # Author 2 
; 
 ? # Address 2 
; 
; 
 ? # Footnote 2 
; 
 
 
_publ_section_abstract 
# Text of the abstract 
# (a) The Abstract must be self-contained and comprehensible 
# without the rest of the paper. This means no references 
# to atom names or to compound numbers; compounds must be 
# identified as the title compound, or by name or by some other 
# means such as derivatives of each other (e.g. "the 
# corresponding ketone"). 
# (b) The chemical formula of "the title compound" must be given. 
# (c) Any crystallographic molecular symmetry should be 
# mentioned, and also the presence of more than one molecule 
# in the asymmetric unit (i.e. anything other than Z'=1). 
; 
? 
; 
 
_publ_section_related_literature  # Not in version 2.3.1 
############################################################### 
# Essential references (e.g. to the origin of the material studied, related 
# structural studies, and to information supporting the reported structure) 
# should be cited in this section, with appropriate very brief explanatory 
# text, for example `The synthesis of the complex is described by Jones 
# (2001). The anhydrous complex has essentially the same coordination 
# geometry (Smith, 2003).' In addition, all references included in the 
# supplementary materials, but not elsewhere in the published article, 
# should be given here. The simple text `For related literature, see:...' 
# may be used, but further details should be provided in the Comment 
# section, which forms part of the supplementary material. 
############################################################### 
; 
? 
; 
 
_publ_section_comment 
# Text of the paper 
# Note that atoms are referenced as N2, not N(2) or N~2~ 
# If text containing () occur within (), the outer ones should be [] 
# Figures should be referenced as Fig. 
; 
? 
; 
_publ_section_acknowledgements    # Acknowledgments 
; 
? 
; 
_publ_section_figure_captions 
# Captions to figures - Start each caption on a new line after a blank line 
; 
Fig. 1. 
The title compound with displacement ellipsoids drawn at the 50% 
probability level. H atoms are shown as spheres of 
arbitary radius. 
 
; 
 
 
_publ_section_exptl_refinement 
# Some potentially useful phrases are donated by Bill Clegg: 
; 
In the absence of significant anomalous scattering, Friedel pairs were 
merged. 
 
The absolute configuration was arbitrarily assigned. 
 
The relatively large ratio of minimum to maximum corrections applied 
in the multiscan process (1:nnn) reflect changes in the illuminated 
volume of the crystal. 
 
Changes in illuminated volume were kept to a minimum, and were 
taken into account (G\"orbitz, 1999) by the multi-scan inter-frame 
scaling (DENZO/SCALEPACK, Otwinowski & Minor, 1997). 
 
 
G\"orbitz, C. H. (1999). Acta Cryst. B55, 1090-1098. 
 
 
 
 
The H atoms were all located in a difference map, but those 
attached to carbon atoms were repositioned geometrically. 
The H atoms were initially refined with soft restraints on the 
bond lengths and angles to regularise their geometry 
(C---H in the range 0.93--0.98, 
N---H in the range 0.86--0.89 
N---H to 0.86 
O---H = 0.82 
\%A) 
and 
U~iso~(H) (in the range 1.2-1.5 times U~eq~ of the parent atom), 
after which the positions were refined with riding constraints 
(Cooper et al, 2010). 
 
Cooper, R. I., Thompson, A. L. & Watkin, D. J. (2010). J. Appl. Cryst. 
43, 1100-1107. 
 
; 
 
_publ_section_exptl_prep 
# Brief details or a reference. Include solvent if known 
; 
? 
; 
 
# Hand-made tables can be put in the cif. The number of columns 
# is set in the loop header. 
# The contants of each column can either be a piece of text 
# without any spaces (eg a number) or other text enclosed in " " 
# Remove the leading # in the following example 
 
#_geom_extra_table_head_A 
#; 
#Table 2. 
#Molecular parameters deviating most from MOGUL averages 
#; 
# 
#loop_ 
#_geom_extra_tableA_col_1 
#_geom_extra_tableA_col_2 
#_geom_extra_tableA_col_3 
#_geom_extra_tableA_col_4 
# 
#Parameter "Observed Value" "MOGUL Value" "MOGUL e.s.d" 
#N5-C6-C4 129 124 "7 (\%)" 
#C3-O10-C2 105 109 "2 (\%)" 
#C6-O7 1.25 1.22 ".02 (\%A)" 
# 
 
data_I 
 
_exptl_special_details 
; 
 The crystal was 
placed in the cold stream of an Oxford 
Cryosystems open-flow nitrogen cryostat (Cosier & 
Glazer, 1986) with a nominal stability of 0.1K. 
 
Cosier, J. & Glazer, A.M., 1986. J. Appl. Cryst. 105-107. 
; 
_refine_special_details 
; 
? 
; 
#--------------------------------------------------------------- 
# _oxford_ data items, April 2010: 
# There is some uncertainty about the correct way of forming local data 
# names, e.g. 
 
# _atom_site_special_shape_oxford 
# or 
# _oxford_atom_site_special_shape 
 
# see: 
# http://www.iucr.org/resources/cif/spec/version1.1/semantics#namespace 
 
# A reserved prefix, e.g. foo, must be used in the following way 
# " If the data file contains items defined in a DDL1 dictionary, the 
# local data names assigned under the reserved prefix must contain it as 
# their first component, e.g. _foo_atom_site_my_item. " 
 
# However, this seems to say the opposite: 
# http://www.iucr.org/__data/iucr/cif/standard/cifstd8.html 
 
# According to advice from the IUCr, CRYSTALS is correct 
#--------------------------------------------------------------- 
# End of 'script/refcif.dat' 
#end of refcif 
_cell_length_a                    18.1059(8)
_cell_length_b                    18.6900(8)
_cell_length_c                    19.5380(8)
_cell_angle_alpha                 79.9160(10)
_cell_angle_beta                  66.223(2)
_cell_angle_gamma                 83.277(2)
_cell_volume                      5949.1(4)
 
_symmetry_cell_setting            'triclinic' 
_symmetry_space_group_name_H-M    'P -1 ' 
_symmetry_space_group_name_Hall   ? 
loop_
 _symmetry_equiv_pos_as_xyz
 'x,y,z'
 '-x,-y,-z'

loop_
_atom_type_symbol
_atom_type_scat_dispersion_real
_atom_type_scat_dispersion_imag
_atom_type_scat_Cromer_Mann_a1
_atom_type_scat_Cromer_Mann_b1
_atom_type_scat_Cromer_Mann_a2
_atom_type_scat_Cromer_Mann_b2
_atom_type_scat_Cromer_Mann_a3
_atom_type_scat_Cromer_Mann_b3
_atom_type_scat_Cromer_Mann_a4
_atom_type_scat_Cromer_Mann_b4
_atom_type_scat_Cromer_Mann_c
_atom_type_scat_source  
 C       0.0033   0.0016   2.3100  20.8439   1.0200  10.2075   1.5886   0.5687
   0.8650  51.6512   0.2156 'International Tables Vol C 4.2.6.8 and 6.1.1.4'
 H       0.0000   0.0000   0.4930  10.5109   0.3229  26.1257   0.1402   3.1424
   0.0408  57.7998   0.0030 'International Tables Vol C 4.2.6.8 and 6.1.1.4'
 N       0.0061   0.0033  12.2126   0.0057   3.1322   9.8933   2.0125  28.9975
   1.1663   0.5826 -11.5290 'International Tables Vol C 4.2.6.8 and 6.1.1.4'
 O       0.0106   0.0060   3.0485  13.2771   2.2868   5.7011   1.5463   0.3239
   0.8670  32.9089   0.2508 'International Tables Vol C 4.2.6.8 and 6.1.1.4'
 Cl      0.1484   0.1585  11.4604   0.0104   7.1964   1.1662   6.2556  18.5194
   1.6455  47.7784  -9.5574 'International Tables Vol C 4.2.6.8 and 6.1.1.4'
 Fe      0.3463   0.8444  11.7695   4.7611   7.3573   0.3072   3.5222  15.3535
   2.3045  76.8805   1.0369 'International Tables Vol C 4.2.6.8 and 6.1.1.4'
 
 
_cell_formula_units_Z                    2

# Given Formula = C90 H90 Cl18 Fe9 N18 O18 
# Dc =      1.59 Fooo =   2880.00 Mu =     15.34 M =   2852.59
# Found Formula = C104.00 H80.00 Cl13 Fe3 N10.00 O13 
# Dc =      1.29 FOOO =   2353.99 Mu =      7.11 M =   2306.27

_chemical_formula_sum             'C104.00 H80.00 Cl13 Fe3 N10.00 O13'
_chemical_formula_moiety          'C104.00 H80.00 Cl13 Fe3 N10.00 O13'
_chemical_compound_source                ?
_chemical_formula_weight           2306.27
 
 
_cell_measurement_reflns_used          382
_cell_measurement_theta_min             10
_cell_measurement_theta_max             20
_cell_measurement_temperature          295
 
_exptl_crystal_description        'prism' 
_exptl_crystal_colour             'brown' 
_exptl_crystal_size_min           0.160 
_exptl_crystal_size_mid           0.170 
_exptl_crystal_size_max           0.250 
 
_exptl_crystal_density_diffrn     1.287 
_exptl_crystal_density_meas       ? 
_exptl_crystal_density_method     'not measured' 
# Non-dispersive F(000): 
_exptl_crystal_F_000              2353.991 
_exptl_absorpt_coefficient_mu     0.711 
 
# Sheldrick geometric approximatio 0.89 0.89 
_exptl_absorpt_correction_type    numerical 
_exptl_absorpt_process_details 
; 
 Analytical Absorption (De Meulenaer & Tompa, 1965) 
; 
_exptl_absorpt_correction_T_min   0.89 
_exptl_absorpt_correction_T_max   0.89 
_diffrn_measurement_device_type   'Bruker Kappa Apex2' 
_diffrn_measurement_device        'Area' 
_diffrn_radiation_monochromator   'graphite' 
_diffrn_radiation_type            'Mo K\a'
_diffrn_radiation_wavelength           0.71073
_diffrn_measurement_method        '\f & \w scans' 
 
# If a reference occurs more than once, delete the author 
# and date from subsequent references. 
_computing_data_collection        'Apex2 (Bruker AXS, 2006)' 
_computing_cell_refinement        'Apex2 (Bruker AXS, 2006)' 
_computing_data_reduction         'Apex2 (Bruker AXS, 2006)' 
_computing_structure_solution     'Superflip (Palatinus & Chapuis, 2007)' 
_computing_structure_refinement   'CRYSTALS (Betteridge et al., 2003)' 
_computing_publication_material   'CRYSTALS (Betteridge et al., 2003)' 
_computing_molecular_graphics     'CAMERON (Watkin et al., 1996)' 
 
_diffrn_standards_interval_time   . 
_diffrn_standards_interval_count  . 
_diffrn_standards_number          0 
_diffrn_standards_decay_%         ? 
 
_diffrn_ambient_temperature        295
_diffrn_reflns_number             82916 
_reflns_number_total              21983 
_diffrn_reflns_av_R_equivalents   0.037 
# Number of reflections without Friedels Law is 0 
# Number of reflections with Friedels Law is 21983 
# Theoretical number of reflections is about 44189 
 
 
_diffrn_reflns_theta_min          1.150 
_diffrn_reflns_theta_max          25.476 
_diffrn_measured_fraction_theta_max 0.994 
 
_diffrn_reflns_theta_full         25.476 
_diffrn_measured_fraction_theta_full 0.994 
 
 
_diffrn_reflns_limit_h_min        -21 
_diffrn_reflns_limit_h_max        21 
_diffrn_reflns_limit_k_min        -20 
_diffrn_reflns_limit_k_max        22 
_diffrn_reflns_limit_l_min        -23 
_diffrn_reflns_limit_l_max        23 
_reflns_limit_h_min               -19 
_reflns_limit_h_max               21 
_reflns_limit_k_min               -21 
_reflns_limit_k_max               22 
_reflns_limit_l_min               0 
_reflns_limit_l_max               23 
 
_oxford_diffrn_Wilson_B_factor    3.28 
_oxford_diffrn_Wilson_scale       504.86 
 
_atom_sites_solution_primary      Other  #heavy,direct,difmap,geom,iterative
# _atom_sites_solution_secondary  difmap
_atom_sites_solution_hydrogens    difmap
 
_refine_diff_density_min          -0.45 
_refine_diff_density_max          0.47 
 
 
# The current dictionary definitions do not cover the 
# situation where the reflections used for refinement were 
# selected by a user-defined sigma threshold 
 
 
# The values actually used during refinement 
_oxford_reflns_threshold_expression_ref     I>2.0\s(I)
_refine_ls_number_reflns          13266 
_refine_ls_number_restraints      48 
_refine_ls_number_parameters      1321 
_oxford_refine_ls_R_factor_ref    0.0483 
_refine_ls_wR_factor_ref          0.1103 
_refine_ls_goodness_of_fit_ref    0.9997 
_refine_ls_shift/su_max           0.0009091 
_refine_ls_shift/su_mean          0.0000323 
 
 
# The values computed with all filters except I/sigma 
_oxford_reflns_number_all         21890 
_refine_ls_R_factor_all           0.0907 
_refine_ls_wR_factor_all          0.1309 
 
# The values computed with a 2 sigma cutoff - a la SHELX 
_reflns_threshold_expression      I>2.0\s(I)
_reflns_number_gt                 13266 
_refine_ls_R_factor_gt            0.0483 
_refine_ls_wR_factor_gt           0.1103 
 
# choose from: rm (reference molecule of known chirality), 
# ad (anomolous dispersion - Flack), rmad (rm and ad), 
# syn (from synthesis), unk (unknown) or . (not applicable). 
_chemical_absolute_configuration  '.' 
 
 
_refine_ls_structure_factor_coef  Fsqd 
_refine_ls_matrix_type            full
_refine_ls_hydrogen_treatment     constr         #undef, noref, refall,
                                                 # refxyz, refU, constr or mixed
_refine_ls_weighting_scheme       calc 
_refine_ls_weighting_details 
;
 Method, part 1, Chebychev polynomial, (Watkin, 1994, Prince, 1982) 
 [weight] = 1.0/[A~0~*T~0~(x)+A~1~*T~1~(x) ... +A~n-1~]*T~n-1~(x)] 
 where A~i~ are the Chebychev coefficients listed below and x= Fcalc/Fmax 
 Method = Robust Weighting (Prince, 1982) 
 W = [weight] * [1-(deltaF/6*sigmaF)^2^]^2^ 
 A~i~ are: 
 2.58 3.25 0.909 
;
# Insert your own references if required - in alphabetical order 
_publ_section_references 
; 
Betteridge, P.W., Carruthers, J.R., Cooper, R.I., 
Prout, K. & Watkin, D.J. (2003). J. Appl. Cryst. 36, 1487. 
 
Bruker Analytical X-ray Systems, Inc., 2006. <i>Apex2</i>, 
Version 2 User Manual, M86-E01078, Madison, WI. 
 
De Meulenaer, J. & Tompa, H. (1965). Acta Cryst. 19, 1014. 
 
Palatinus, L. & Chapuis, G. (2007). J. Appl. Cryst. 40, 786-790. 
 
Prince, E. 
Mathematical Techniques in Crystallography 
and Materials Science 
Springer-Verlag, New York, 1982. 
 
Watkin D.J. (1994). 
Acta Cryst, A50, 411-437. 
 
Watkin, D.J., Prout, C.K. & Pearce, L.J. (1996). CAMERON, Chemical 
Crystallography Laboratory, Oxford, UK. 
; 

# Uequiv = arithmetic mean of Ui i.e. Ueqiv = (U1+U2+U3)/3

# Replace last . with number of unfound hydrogen atoms attached to an atom.

# ..._refinement_flags_... 
# . no refinement constraints           S special position constraint on site
# G rigid group refinement of site      R riding atom
# D distance or angle restraint on site T thermal displacement constraints
# U Uiso or Uij restraint (rigid bond)  P partial occupancy constraint


loop_
_atom_site_label
_atom_site_type_symbol
_atom_site_fract_x
_atom_site_fract_y
_atom_site_fract_z
_atom_site_U_iso_or_equiv
_atom_site_occupancy
_atom_site_adp_type
_atom_site_refinement_flags_posn
_atom_site_refinement_flags_adp
_atom_site_refinement_flags_occupancy
_atom_site_disorder_assembly
_atom_site_disorder_group
_atom_site_attached_hydrogens
Fe1 Fe 0.70102(3) 0.22864(3) 0.79297(3) 0.0317 1.0000 Uani . . . . . . 
Fe2 Fe 0.53462(3) 0.31402(3) 0.78160(3) 0.0330 1.0000 Uani . . . . . . 
Fe3 Fe 0.57534(3) 0.14101(3) 0.75780(3) 0.0312 1.0000 Uani . . . . . . 
O1 O 0.65475(16) 0.29687(14) 0.87140(16) 0.0405 1.0000 Uani . . . . . . 
O2 O 0.53064(17) 0.33556(15) 0.88044(15) 0.0409 1.0000 Uani . . . . . . 
O3 O 0.67660(16) 0.14163(14) 0.87456(15) 0.0372 1.0000 Uani . . . . . . 
O4 O 0.61392(16) 0.07427(13) 0.83258(15) 0.0372 1.0000 Uani . . . . . . 
O5 O 0.53431(17) 0.19116(14) 0.67857(15) 0.0389 1.0000 Uani . . . . . . 
O6 O 0.53880(18) 0.30961(14) 0.67768(15) 0.0418 1.0000 Uani . . . . . . 
O7 O 0.74106(16) 0.30862(15) 0.70395(16) 0.0426 1.0000 Uani . . . . . . 
O8 O 0.62914(16) 0.37995(14) 0.72566(15) 0.0390 1.0000 Uani . . . . . . 
O9 O 0.76779(15) 0.16113(14) 0.71683(15) 0.0362 1.0000 Uani . . . . . . 
O10 O 0.68450(17) 0.13119(15) 0.67025(15) 0.0409 1.0000 Uani . . . . . . 
O11 O 0.43307(16) 0.26092(14) 0.83645(16) 0.0404 1.0000 Uani . . . . . . 
O12 O 0.46062(16) 0.14129(14) 0.83565(15) 0.0383 1.0000 Uani . . . . . . 
O13 O 0.60257(14) 0.22662(13) 0.77946(14) 0.0311 1.0000 Uani . . . . . . 
N1 N 0.8103(2) 0.23830(19) 0.8091(2) 0.0436 1.0000 Uani . . . . . . 
N2 N 0.4560(2) 0.40964(17) 0.7822(2) 0.0416 1.0000 Uani . . . . . . 
N3 N 0.5511(2) 0.03919(17) 0.7327(2) 0.0400 1.0000 Uani . . . . . . 
N4 N 0.7047(3) 0.4576(3) 0.8743(3) 0.0712 1.0000 Uani . . . . . . 
N5 N 0.7377(3) -0.0596(2) 0.8109(2) 0.0646 1.0000 Uani . . . . . . 
N6 N 0.4278(2) 0.1676(2) 0.5919(2) 0.0569 1.0000 Uani . . . . . . 
N7 N 0.6699(3) 0.5371(2) 0.6780(2) 0.0562 1.0000 Uani . . . . . . 
N8 N 0.9257(2) 0.0638(2) 0.6671(2) 0.0533 1.0000 Uani . . . . . . 
N9 N 0.2532(3) 0.2235(3) 0.8112(3) 0.0828 1.0000 Uani . . . . . . 
N10 N 0.8987(16) 0.0403(12) 0.0354(8) 0.161(9) 0.3333 Uiso D . . . 3 . 
N11 N -0.0234(17) 0.4479(12) 0.1142(12) 0.193(12) 0.3333 Uiso D . . . 1 . 
N12 N -0.0056(8) 0.5252(11) 0.4722(7) 0.145(9) 0.3333 Uiso D . . . 2 . 
C1 C 0.5887(3) 0.3298(2) 0.9005(2) 0.0390 1.0000 Uani . . . . . . 
C2 C 0.5753(3) 0.3672(3) 0.9690(3) 0.0536 1.0000 Uani . . . . . . 
C3 C 0.6479(3) 0.3696(3) 0.9864(3) 0.0524 1.0000 Uani . . . . . . 
C4 C 0.6557(4) 0.3282(3) 1.0493(3) 0.0673 1.0000 Uani . . . . . . 
C5 C 0.7204(4) 0.3329(4) 1.0685(3) 0.0784 1.0000 Uani . . . . . . 
C6 C 0.7789(4) 0.3795(3) 1.0247(4) 0.0729 1.0000 Uani . . . . . . 
C7 C 0.7735(3) 0.4210(3) 0.9611(3) 0.0646 1.0000 Uani . . . . . . 
C8 C 0.7091(3) 0.4159(3) 0.9420(3) 0.0547 1.0000 Uani . . . . . . 
C9 C 0.7505(4) 0.5180(3) 0.8389(3) 0.0650 1.0000 Uani . . . . . . 
C10 C 0.8181(4) 0.5148(3) 0.7727(4) 0.0730 1.0000 Uani . . . . . . 
C11 C 0.8641(4) 0.5732(4) 0.7340(4) 0.0861 1.0000 Uani . . . . . . 
C12 C 0.8427(5) 0.6371(4) 0.7631(5) 0.0963 1.0000 Uani . . . . . . 
C13 C 0.7764(5) 0.6443(3) 0.8290(5) 0.0906 1.0000 Uani . . . . . . 
C14 C 0.7297(4) 0.5845(3) 0.8670(4) 0.0774 1.0000 Uani . . . . . . 
C15 C 0.6474(2) 0.0834(2) 0.8753(2) 0.0350 1.0000 Uani . . . . . . 
C16 C 0.6531(3) 0.0200(2) 0.9331(2) 0.0413 1.0000 Uani . . . . . . 
C17 C 0.6263(3) -0.0515(2) 0.9301(2) 0.0420 1.0000 Uani . . . . . . 
C18 C 0.5581(3) -0.0826(2) 0.9883(2) 0.0468 1.0000 Uani . . . . . . 
C19 C 0.5375(3) -0.1513(2) 0.9889(3) 0.0549 1.0000 Uani . . . . . . 
C20 C 0.5841(3) -0.1913(3) 0.9329(3) 0.0567 1.0000 Uani . . . . . . 
C21 C 0.6515(3) -0.1606(2) 0.8736(3) 0.0540 1.0000 Uani . . . . . . 
C22 C 0.6727(3) -0.0915(2) 0.8716(2) 0.0461 1.0000 Uani . . . . . . 
C23 C 0.8036(3) -0.1024(3) 0.7678(3) 0.0576 1.0000 Uani . . . . . . 
C24 C 0.8214(3) -0.1049(3) 0.6910(3) 0.0650 1.0000 Uani . . . . . . 
C25 C 0.8895(4) -0.1438(3) 0.6481(4) 0.0748 1.0000 Uani . . . . . . 
C26 C 0.9377(4) -0.1816(3) 0.6791(4) 0.0801 1.0000 Uani . . . . . . 
C27 C 0.9230(4) -0.1813(3) 0.7538(4) 0.0788 1.0000 Uani . . . . . . 
C28 C 0.8564(3) -0.1417(3) 0.7977(3) 0.0698 1.0000 Uani . . . . . . 
C29 C 0.5382(2) 0.2564(2) 0.6474(2) 0.0378 1.0000 Uani . . . . . . 
C30 C 0.5399(3) 0.2722(2) 0.5684(2) 0.0498 1.0000 Uani . . . . . . 
C31 C 0.5626(3) 0.2086(3) 0.5258(3) 0.0507 1.0000 Uani . . . . . . 
C32 C 0.6405(3) 0.1972(3) 0.4738(3) 0.0732 1.0000 Uani . . . . . . 
C33 C 0.6608(4) 0.1390(4) 0.4323(4) 0.0903 1.0000 Uani . . . . . . 
C34 C 0.6040(4) 0.0924(4) 0.4419(4) 0.0819 1.0000 Uani . . . . . . 
C35 C 0.5279(3) 0.1021(3) 0.4941(3) 0.0611 1.0000 Uani . . . . . . 
C36 C 0.5060(3) 0.1590(2) 0.5370(3) 0.0493 1.0000 Uani . . . . . . 
C37 C 0.3637(3) 0.1330(3) 0.5917(3) 0.0608 1.0000 Uani . . . . . . 
C38 C 0.3395(4) 0.1510(3) 0.5308(4) 0.0755 1.0000 Uani . . . . . . 
C39 C 0.2769(4) 0.1142(4) 0.5286(5) 0.0939 1.0000 Uani . . . . . . 
C40 C 0.2390(4) 0.0636(4) 0.5892(6) 0.1021 1.0000 Uani . . . . . . 
C41 C 0.2569(4) 0.0468(4) 0.6515(5) 0.0925 1.0000 Uani . . . . . . 
C42 C 0.3208(3) 0.0824(3) 0.6517(4) 0.0725 1.0000 Uani . . . . . . 
C43 C 0.8096(3) 0.2361(3) 0.8777(3) 0.0549 1.0000 Uani . . . . . . 
C44 C 0.8782(3) 0.2468(3) 0.8888(4) 0.0700 1.0000 Uani . . . . . . 
C45 C 0.9473(3) 0.2614(3) 0.8274(4) 0.0786 1.0000 Uani . . . . . . 
C46 C 0.9490(3) 0.2634(3) 0.7581(4) 0.0700 1.0000 Uani . . . . . . 
C47 C 0.8801(3) 0.2519(2) 0.7498(3) 0.0524 1.0000 Uani . . . . . . 
C48 C 0.3953(3) 0.4242(2) 0.8452(3) 0.0549 1.0000 Uani . . . . . . 
C49 C 0.3425(3) 0.4844(3) 0.8500(3) 0.0693 1.0000 Uani . . . . . . 
C50 C 0.3525(3) 0.5314(3) 0.7852(4) 0.0704 1.0000 Uani . . . . . . 
C51 C 0.4137(3) 0.5180(3) 0.7190(3) 0.0613 1.0000 Uani . . . . . . 
C52 C 0.4645(3) 0.4568(2) 0.7197(3) 0.0487 1.0000 Uani . . . . . . 
C53 C 0.5152(3) -0.0142(2) 0.7878(3) 0.0521 1.0000 Uani . . . . . . 
C54 C 0.5000(4) -0.0781(3) 0.7717(4) 0.0688 1.0000 Uani . . . . . . 
C55 C 0.5200(4) -0.0876(3) 0.6988(4) 0.0694 1.0000 Uani . . . . . . 
C56 C 0.5561(3) -0.0348(3) 0.6430(3) 0.0604 1.0000 Uani . . . . . . 
C57 C 0.5712(3) 0.0286(2) 0.6608(3) 0.0476 1.0000 Uani . . . . . . 
C58 C 0.7010(2) 0.3626(2) 0.6855(2) 0.0392 1.0000 Uani . . . . . . 
C59 C 0.7435(3) 0.4091(3) 0.6124(3) 0.0540 1.0000 Uani . . . . . . 
C60 C 0.6913(3) 0.4613(3) 0.5818(3) 0.0537 1.0000 Uani . . . . . . 
C61 C 0.6748(4) 0.4493(3) 0.5210(3) 0.0706 1.0000 Uani . . . . . . 
C62 C 0.6277(4) 0.4977(4) 0.4932(4) 0.0831 1.0000 Uani . . . . . . 
C63 C 0.5968(4) 0.5606(4) 0.5230(4) 0.0820 1.0000 Uani . . . . . . 
C64 C 0.6125(4) 0.5745(3) 0.5830(3) 0.0678 1.0000 Uani . . . . . . 
C65 C 0.6581(3) 0.5246(3) 0.6136(3) 0.0547 1.0000 Uani . . . . . . 
C66 C 0.6660(3) 0.6080(3) 0.6941(3) 0.0605 1.0000 Uani . . . . . . 
C67 C 0.7257(4) 0.6561(3) 0.6452(3) 0.0734 1.0000 Uani . . . . . . 
C68 C 0.7222(5) 0.7273(4) 0.6583(4) 0.0902 1.0000 Uani . . . . . . 
C69 C 0.6600(6) 0.7501(4) 0.7199(5) 0.0988 1.0000 Uani . . . . . . 
C70 C 0.6028(5) 0.7040(4) 0.7703(5) 0.0942 1.0000 Uani . . . . . . 
C71 C 0.6063(4) 0.6326(3) 0.7572(3) 0.0739 1.0000 Uani . . . . . . 
C72 C 0.7530(2) 0.1427(2) 0.6652(2) 0.0345 1.0000 Uani . . . . . . 
C73 C 0.8227(2) 0.1298(2) 0.5920(2) 0.0440 1.0000 Uani . . . . . . 
C74 C 0.9015(3) 0.1607(2) 0.5769(2) 0.0444 1.0000 Uani . . . . . . 
C75 C 0.9276(3) 0.2225(3) 0.5254(3) 0.0558 1.0000 Uani . . . . . . 
C76 C 1.0028(3) 0.2484(3) 0.5072(3) 0.0627 1.0000 Uani . . . . . . 
C77 C 1.0531(3) 0.2131(3) 0.5394(3) 0.0634 1.0000 Uani . . . . . . 
C78 C 1.0281(3) 0.1524(3) 0.5919(3) 0.0545 1.0000 Uani . . . . . . 
C79 C 0.9529(3) 0.1252(2) 0.6117(2) 0.0454 1.0000 Uani . . . . . . 
C80 C 0.9780(3) 0.0177(3) 0.6935(3) 0.0546 1.0000 Uani . . . . . . 
C81 C 0.9686(4) 0.0116(3) 0.7687(3) 0.0692 1.0000 Uani . . . . . . 
C82 C 1.0171(4) -0.0355(4) 0.7979(4) 0.0831 1.0000 Uani . . . . . . 
C83 C 1.0771(4) -0.0765(4) 0.7495(5) 0.0932 1.0000 Uani . . . . . . 
C84 C 1.0895(4) -0.0735(3) 0.6746(5) 0.0871 1.0000 Uani . . . . . . 
C85 C 1.0397(3) -0.0257(3) 0.6473(3) 0.0683 1.0000 Uani . . . . . . 
C86 C 0.4141(2) 0.1961(2) 0.8567(2) 0.0371 1.0000 Uani . . . . . . 
C87 C 0.3296(2) 0.1812(2) 0.9139(3) 0.0479 1.0000 Uani . . . . . . 
C88 C 0.2706(3) 0.2461(3) 0.9202(3) 0.0510 1.0000 Uani . . . . . . 
C89 C 0.2514(3) 0.2881(3) 0.9768(3) 0.0626 1.0000 Uani . . . . . . 
C90 C 0.1994(3) 0.3496(3) 0.9828(3) 0.0753 1.0000 Uani . . . . . . 
C91 C 0.1662(3) 0.3699(3) 0.9307(3) 0.0756 1.0000 Uani . . . . . . 
C92 C 0.1829(3) 0.3278(3) 0.8740(3) 0.0756 1.0000 Uani . . . . . . 
C93 C 0.2352(3) 0.2670(3) 0.8680(3) 0.0627 1.0000 Uani . . . . . . 
C94 C 0.2309(4) 0.2438(4) 0.7498(4) 0.0731 1.0000 Uani . . . . . . 
C95 C 0.2668(3) 0.3008(4) 0.6933(4) 0.0770 1.0000 Uani . . . . . . 
C96 C 0.2483(4) 0.3204(4) 0.6306(4) 0.0866 1.0000 Uani . . . . . . 
C97 C 0.1934(4) 0.2816(4) 0.6227(4) 0.0924 1.0000 Uani . . . . . . 
C98 C 0.1571(4) 0.2252(4) 0.6763(4) 0.0856 1.0000 Uani . . . . . . 
C99 C 0.1748(4) 0.2076(4) 0.7393(4) 0.0792 1.0000 Uani . . . . . . 
C100 C 0.8500(14) 0.0961(12) 0.0672(8) 0.138(7) 0.3333 Uiso D U . . 3 . 
C101 C 0.7656(14) 0.1000(10) 0.0940(7) 0.156(8) 0.3333 Uiso D U . . 3 . 
C102 C 0.7282(11) 0.0413(12) 0.0883(7) 0.156(11) 0.3333 Uiso D . . . 3 . 
C103 C 0.7769(15) -0.0181(11) 0.0572(8) 0.137(7) 0.3333 Uiso D U . . 3 . 
C104 C 0.8607(15) -0.0160(15) 0.0317(8) 0.156(8) 0.3333 Uiso D U . . 3 . 
C105 C 0.022(2) 0.5012(13) 0.1112(17) 0.188(10) 0.3333 Uiso D U . . 1 . 
C106 C -0.0046(17) 0.5481(15) 0.1658(14) 0.159(8) 0.3333 Uiso D U . . 1 . 
C107 C -0.0808(17) 0.5413(12) 0.2248(13) 0.180(14) 0.3333 Uiso D . . . 1 . 
C108 C -0.1276(12) 0.4860(13) 0.2260(11) 0.189(10) 0.3333 Uiso D U . . 1 . 
C109 C -0.0976(16) 0.4402(10) 0.1700(15) 0.160(8) 0.3333 Uiso D U . . 1 . 
C110 C 0.0384(8) 0.5645(9) 0.4925(9) 0.175(16) 0.3333 Uiso D . . . 2 . 
C111 C 0.0669(7) 0.5348(11) 0.5488(10) 0.132(9) 0.3333 Uiso D . . . 2 . 
C112 C 0.0508(8) 0.4631(12) 0.5841(8) 0.164(12) 0.3333 Uiso D . . . 2 . 
C113 C 0.0049(8) 0.4242(9) 0.5614(8) 0.126(9) 0.3333 Uiso D . . . 2 . 
C114 C -0.0230(7) 0.4561(11) 0.5052(9) 0.112(8) 0.3333 Uiso D . . . 2 . 
Cl1 Cl 0.84798(13) 0.43427(10) 0.73446(12) 0.1077 1.0000 Uani . . . . . . 
Cl2 Cl 0.64655(12) 0.59104(13) 0.94756(12) 0.1172 1.0000 Uani . . . . . . 
Cl3 Cl 0.75657(10) -0.05922(9) 0.65073(9) 0.0823 1.0000 Uani . . . . . . 
Cl4 Cl 0.83813(11) -0.13900(10) 0.89039(9) 0.0947 1.0000 Uani . . . . . . 
Cl5 Cl 0.38487(12) 0.21666(11) 0.45836(11) 0.0971 1.0000 Uani . . . . . . 
Cl6 Cl 0.34740(10) 0.06176(10) 0.72866(10) 0.0934 1.0000 Uani . . . . . . 
Cl7 Cl 0.80466(12) 0.62619(11) 0.57032(10) 0.1003 1.0000 Uani . . . . . . 
Cl8 Cl 0.53529(11) 0.57311(12) 0.81977(10) 0.1004 1.0000 Uani . . . . . . 
Cl9 Cl 0.89238(12) 0.06237(9) 0.82886(9) 0.0935 1.0000 Uani . . . . . . 
Cl10 Cl 1.05360(10) -0.02131(9) 0.55494(9) 0.0915 1.0000 Uani . . . . . . 
Cl11 Cl 0.33900(11) 0.34760(12) 0.70066(12) 0.1077 1.0000 Uani . . . . . . 
Cl12 Cl 0.12776(12) 0.13589(12) 0.80576(13) 0.1168 1.0000 Uani . . . . . . 
Cl13 Cl 0.8398(6) 0.2844(6) 0.3852(6) 0.133(3) 0.2500 Uiso . . . . . . 
Cl14 Cl 0.8036(6) 0.2585(5) 0.2288(5) 0.117(3) 0.2500 Uiso . . . . . . 
Cl15 Cl 0.592(2) 0.2597(17) 0.2856(18) 0.204(11) 0.1250 Uiso . . . . . . 
Cl16 Cl 0.932(2) 0.2453(18) 0.0632(19) 0.196(11) 0.1250 Uiso . . . . 2 . 
Cl17 Cl 0.997(2) 0.2334(17) 0.0311(18) 0.188(11) 0.1250 Uiso . . . . 3 . 
Cl18 Cl 0.7134(14) 0.3709(13) 0.3551(13) 0.150(7) 0.1250 Uiso . . . . . . 
H21 H 0.5550 0.4160 0.9597 0.0649 1.0000 Uiso R . . . . . 
H22 H 0.5342 0.3415 1.0130 0.0654 1.0000 Uiso R . . . . . 
H41 H 0.6902 0.4372 0.8474 0.0863 1.0000 Uiso R . . . . . 
H51 H 0.7234 0.3044 1.1110 0.0938 1.0000 Uiso R . . . . . 
H61 H 0.4230 0.1839 0.6309 0.0694 1.0000 Uiso R . . . . . 
H71 H 0.6607 0.5027 0.7139 0.0680 1.0000 Uiso R . . . . . 
H81 H 0.8765 0.0654 0.6970 0.0643 1.0000 Uiso R . . . . . 
H91 H 0.2717 0.1825 0.8031 0.0941 1.0000 Uiso R . . . . . 
H111 H 0.9080 0.5689 0.6900 0.1039 1.0000 Uiso R . . . . . 
H121 H 0.8737 0.6767 0.7377 0.1172 1.0000 Uiso R . . . . . 
H131 H 0.7630 0.6883 0.8475 0.1100 1.0000 Uiso R . . . . . 
H161 H 0.7084 0.0138 0.9269 0.0486 1.0000 Uiso R . . . . . 
H162 H 0.6210 0.0336 0.9821 0.0491 1.0000 Uiso R . . . . . 
H181 H 0.5264 -0.0566 1.0278 0.0558 1.0000 Uiso R . . . . . 
H191 H 0.4918 -0.1701 1.0282 0.0657 1.0000 Uiso R . . . . . 
H201 H 0.5706 -0.2385 0.9337 0.0680 1.0000 Uiso R . . . . . 
H211 H 0.6833 -0.1871 0.8347 0.0647 1.0000 Uiso R . . . . . 
H251 H 0.9013 -0.1438 0.5976 0.0890 1.0000 Uiso R . . . . . 
H261 H 0.9817 -0.2088 0.6497 0.0971 1.0000 Uiso R . . . . . 
H271 H 0.9577 -0.2065 0.7752 0.0947 1.0000 Uiso R . . . . . 
H301 H 0.5784 0.3087 0.5400 0.0602 1.0000 Uiso R . . . . . 
H302 H 0.4862 0.2910 0.5731 0.0598 1.0000 Uiso R . . . . . 
H321 H 0.6788 0.2291 0.4673 0.0881 1.0000 Uiso R . . . . . 
H331 H 0.7131 0.1320 0.3977 0.1103 1.0000 Uiso R . . . . . 
H341 H 0.6165 0.0540 0.4134 0.0989 1.0000 Uiso R . . . . . 
H351 H 0.4899 0.0698 0.5011 0.0742 1.0000 Uiso R . . . . . 
H391 H 0.2615 0.1245 0.4877 0.1131 1.0000 Uiso R . . . . . 
H401 H 0.1978 0.0389 0.5884 0.1240 1.0000 Uiso R . . . . . 
H411 H 0.2279 0.0135 0.6923 0.1121 1.0000 Uiso R . . . . . 
H431 H 0.7618 0.2268 0.9191 0.0668 1.0000 Uiso R . . . . . 
H441 H 0.8763 0.2436 0.9368 0.0853 1.0000 Uiso R . . . . . 
H451 H 0.9932 0.2695 0.8340 0.0962 1.0000 Uiso R . . . . . 
H461 H 0.9966 0.2731 0.7159 0.0851 1.0000 Uiso R . . . . . 
H471 H 0.8812 0.2532 0.7017 0.0622 1.0000 Uiso R . . . . . 
H481 H 0.3881 0.3921 0.8887 0.0669 1.0000 Uiso R . . . . . 
H491 H 0.3015 0.4920 0.8965 0.0842 1.0000 Uiso R . . . . . 
H501 H 0.3173 0.5722 0.7867 0.0861 1.0000 Uiso R . . . . . 
H511 H 0.4218 0.5484 0.6746 0.0743 1.0000 Uiso R . . . . . 
H521 H 0.5068 0.4470 0.6748 0.0583 1.0000 Uiso R . . . . . 
H531 H 0.5011 -0.0077 0.8380 0.0629 1.0000 Uiso R . . . . . 
H541 H 0.4761 -0.1145 0.8107 0.0833 1.0000 Uiso R . . . . . 
H551 H 0.5095 -0.1301 0.6876 0.0848 1.0000 Uiso R . . . . . 
H561 H 0.5701 -0.0407 0.5934 0.0730 1.0000 Uiso R . . . . . 
H571 H 0.5957 0.0653 0.6220 0.0579 1.0000 Uiso R . . . . . 
H591 H 0.7819 0.4360 0.6192 0.0650 1.0000 Uiso R . . . . . 
H592 H 0.7722 0.3767 0.5765 0.0650 1.0000 Uiso R . . . . . 
H611 H 0.6960 0.4072 0.4995 0.0858 1.0000 Uiso R . . . . . 
H621 H 0.6174 0.4875 0.4534 0.1010 1.0000 Uiso R . . . . . 
H631 H 0.5645 0.5932 0.5042 0.0992 1.0000 Uiso R . . . . . 
H641 H 0.5924 0.6176 0.6033 0.0816 1.0000 Uiso R . . . . . 
H681 H 0.7619 0.7591 0.6254 0.1091 1.0000 Uiso R . . . . . 
H691 H 0.6562 0.7985 0.7279 0.1190 1.0000 Uiso R . . . . . 
H701 H 0.5627 0.7198 0.8127 0.1139 1.0000 Uiso R . . . . . 
H731 H 0.8053 0.1509 0.5509 0.0530 1.0000 Uiso R . . . . . 
H732 H 0.8318 0.0774 0.5913 0.0531 1.0000 Uiso R . . . . . 
H751 H 0.8938 0.2468 0.5027 0.0670 1.0000 Uiso R . . . . . 
H761 H 1.0185 0.2903 0.4728 0.0748 1.0000 Uiso R . . . . . 
H771 H 1.1040 0.2303 0.5254 0.0761 1.0000 Uiso R . . . . . 
H781 H 1.0628 0.1288 0.6141 0.0658 1.0000 Uiso R . . . . . 
H821 H 1.0096 -0.0384 0.8475 0.1002 1.0000 Uiso R . . . . . 
H831 H 1.1103 -0.1077 0.7678 0.1118 1.0000 Uiso R . . . . . 
H841 H 1.1297 -0.1020 0.6431 0.1059 1.0000 Uiso R . . . . . 
H871 H 0.3328 0.1655 0.9621 0.0569 1.0000 Uiso R . . . . . 
H872 H 0.3137 0.1465 0.8936 0.0566 1.0000 Uiso R . . . . . 
H891 H 0.2734 0.2751 1.0122 0.0760 1.0000 Uiso R . . . . . 
H901 H 0.1877 0.3760 1.0222 0.0908 1.0000 Uiso R . . . . . 
H911 H 0.1332 0.4115 0.9333 0.0910 1.0000 Uiso R . . . . . 
H921 H 0.1586 0.3408 0.8398 0.0912 1.0000 Uiso R . . . . . 
H961 H 0.2728 0.3594 0.5940 0.1040 1.0000 Uiso R . . . . . 
H971 H 0.1803 0.2940 0.5801 0.1108 1.0000 Uiso R . . . . . 
H981 H 0.1205 0.1984 0.6710 0.1027 1.0000 Uiso R . . . . . 
H1132 H 0.8132 0.4523 0.9307 0.0775 1.0000 Uiso R . . . . . 
H1133 H 0.8219 0.3834 1.0380 0.0891 1.0000 Uiso R . . . . . 
H1134 H 0.6160 0.2960 1.0789 0.0812 1.0000 Uiso R . . . . . 
H1135 H 0.7368 -0.0141 0.7991 0.0782 1.0000 Uiso R . . . . . 
H1001 H 0.8756 0.1357 0.0716 0.1644 0.3333 Uiso R . . . 3 . 
H1011 H 0.7351 0.1414 0.1153 0.1872 0.3333 Uiso R . . . 3 . 
H1021 H 0.6711 0.0422 0.1053 0.1883 0.3333 Uiso R . . . 3 . 
H1031 H 0.7568 -0.0511 0.0530 0.1632 0.3333 Uiso R . . . 3 . 
H1041 H 0.8926 -0.0568 0.0106 0.1867 0.3333 Uiso R . . . 3 . 
H1051 H 0.0741 0.5068 0.0713 0.2256 0.3333 Uiso R . . . 1 . 
H1061 H 0.0291 0.5849 0.1627 0.1905 0.3333 Uiso R . . . 1 . 
H1071 H -0.1000 0.5727 0.2623 0.2159 0.3333 Uiso R . . . 1 . 
H1081 H -0.1799 0.4797 0.2650 0.2263 0.3333 Uiso R . . . 1 . 
H1091 H -0.1300 0.4030 0.1715 0.1919 0.3333 Uiso R . . . 1 . 
H1101 H 0.0502 0.6129 0.4683 0.2037 0.3333 Uiso R . . . 2 . 
H1111 H 0.0972 0.5633 0.5630 0.1595 0.3333 Uiso R . . . 2 . 
H1121 H 0.0701 0.4416 0.6220 0.1951 0.3333 Uiso R . . . 2 . 
H1131 H -0.0073 0.3755 0.5844 0.1512 0.3333 Uiso R . . . 2 . 
H1141 H -0.0541 0.4292 0.4904 0.1378 0.3333 Uiso R . . . 2 . 
loop_
_atom_site_aniso_label
_atom_site_aniso_U_11
_atom_site_aniso_U_22
_atom_site_aniso_U_33
_atom_site_aniso_U_23
_atom_site_aniso_U_13
_atom_site_aniso_U_12
Fe1 0.0302(3) 0.0302(3) 0.0353(3) -0.0127(2) -0.0106(2) 0.0004(2) 
Fe2 0.0320(3) 0.0274(3) 0.0372(3) -0.0077(2) -0.0103(2) 0.0003(2) 
Fe3 0.0325(3) 0.0276(3) 0.0350(3) -0.0078(2) -0.0134(2) -0.0016(2) 
O1 0.0377(16) 0.0387(15) 0.0480(17) -0.0259(13) -0.0136(13) 0.0044(12) 
O2 0.0390(16) 0.0439(16) 0.0402(16) -0.0173(13) -0.0130(13) 0.0043(12) 
O3 0.0422(16) 0.0337(14) 0.0405(15) -0.0074(12) -0.0198(13) -0.0029(12) 
O4 0.0427(16) 0.0295(14) 0.0434(16) -0.0053(12) -0.0207(13) -0.0029(12) 
O5 0.0447(16) 0.0332(15) 0.0419(16) -0.0063(12) -0.0196(13) -0.0032(12) 
O6 0.0553(18) 0.0315(15) 0.0409(16) -0.0073(12) -0.0212(14) 0.0015(13) 
O7 0.0346(15) 0.0398(16) 0.0468(17) -0.0061(13) -0.0084(13) -0.0052(13) 
O8 0.0377(16) 0.0306(14) 0.0427(16) -0.0067(12) -0.0086(13) -0.0032(12) 
O9 0.0322(14) 0.0360(14) 0.0429(15) -0.0194(12) -0.0137(12) 0.0066(11) 
O10 0.0393(16) 0.0441(16) 0.0409(16) -0.0194(13) -0.0118(13) -0.0020(13) 
O11 0.0326(15) 0.0349(15) 0.0506(17) -0.0035(13) -0.0142(13) -0.0015(12) 
O12 0.0360(15) 0.0340(15) 0.0400(15) -0.0055(12) -0.0090(12) -0.0042(12) 
O13 0.0292(13) 0.0288(13) 0.0358(14) -0.0079(11) -0.0127(11) 0.0009(10) 
N1 0.0368(19) 0.047(2) 0.052(2) -0.0205(17) -0.0178(17) 0.0004(16) 
N2 0.0369(19) 0.0311(18) 0.052(2) -0.0106(16) -0.0132(17) 0.0060(14) 
N3 0.0416(19) 0.0335(18) 0.052(2) -0.0140(16) -0.0228(17) 0.0023(15) 
N4 0.084(3) 0.077(3) 0.078(3) -0.008(2) -0.055(3) -0.023(3) 
N5 0.069(3) 0.042(2) 0.059(3) -0.0055(19) 0.000(2) -0.008(2) 
N6 0.054(2) 0.063(3) 0.061(3) -0.022(2) -0.024(2) -0.002(2) 
N7 0.076(3) 0.043(2) 0.053(2) -0.0002(18) -0.029(2) -0.0065(19) 
N8 0.040(2) 0.055(2) 0.057(2) -0.0027(19) -0.0113(18) -0.0063(18) 
N9 0.094(4) 0.081(3) 0.089(4) -0.039(3) -0.052(3) 0.038(3) 
C1 0.041(2) 0.036(2) 0.040(2) -0.0109(18) -0.0126(19) -0.0067(18) 
C2 0.049(3) 0.064(3) 0.050(3) -0.032(2) -0.013(2) 0.006(2) 
C3 0.057(3) 0.057(3) 0.049(3) -0.031(2) -0.021(2) 0.012(2) 
C4 0.082(4) 0.070(4) 0.054(3) -0.020(3) -0.028(3) -0.001(3) 
C5 0.102(5) 0.083(4) 0.066(4) -0.020(3) -0.049(4) 0.011(4) 
C6 0.078(4) 0.076(4) 0.090(4) -0.028(3) -0.057(4) 0.013(3) 
C7 0.065(3) 0.066(3) 0.079(4) -0.023(3) -0.042(3) 0.000(3) 
C8 0.062(3) 0.056(3) 0.059(3) -0.023(2) -0.035(3) 0.007(2) 
C9 0.072(4) 0.067(3) 0.076(4) -0.017(3) -0.047(3) -0.004(3) 
C10 0.085(4) 0.063(3) 0.092(4) -0.026(3) -0.051(4) 0.003(3) 
C11 0.090(5) 0.089(5) 0.086(5) -0.014(4) -0.039(4) -0.015(4) 
C12 0.124(6) 0.071(4) 0.105(6) -0.006(4) -0.055(5) -0.020(4) 
C13 0.122(6) 0.054(4) 0.122(6) -0.035(4) -0.069(5) 0.010(4) 
C14 0.085(4) 0.077(4) 0.092(4) -0.033(3) -0.052(4) 0.006(3) 
C15 0.037(2) 0.033(2) 0.036(2) -0.0094(17) -0.0144(18) 0.0014(17) 
C16 0.050(3) 0.039(2) 0.039(2) -0.0041(18) -0.021(2) -0.0008(19) 
C17 0.049(2) 0.036(2) 0.041(2) -0.0028(18) -0.019(2) 0.0022(18) 
C18 0.051(3) 0.043(2) 0.042(2) -0.0007(19) -0.017(2) 0.002(2) 
C19 0.050(3) 0.045(3) 0.060(3) 0.002(2) -0.014(2) -0.009(2) 
C20 0.058(3) 0.040(2) 0.069(3) -0.007(2) -0.021(3) -0.008(2) 
C21 0.058(3) 0.044(3) 0.055(3) -0.013(2) -0.015(2) -0.004(2) 
C22 0.051(3) 0.036(2) 0.046(2) 0.0008(19) -0.014(2) -0.0060(19) 
C23 0.057(3) 0.040(3) 0.061(3) -0.004(2) -0.007(2) -0.013(2) 
C24 0.066(3) 0.052(3) 0.067(3) -0.014(3) -0.011(3) -0.014(3) 
C25 0.071(4) 0.068(4) 0.072(4) -0.024(3) -0.005(3) -0.016(3) 
C26 0.063(4) 0.065(4) 0.091(5) -0.021(3) -0.003(3) -0.010(3) 
C27 0.062(4) 0.055(3) 0.107(5) 0.001(3) -0.024(4) -0.010(3) 
C28 0.064(3) 0.057(3) 0.073(4) 0.003(3) -0.013(3) -0.016(3) 
C29 0.035(2) 0.033(2) 0.044(2) -0.0058(18) -0.0148(18) -0.0018(17) 
C30 0.064(3) 0.047(3) 0.044(3) -0.002(2) -0.025(2) -0.011(2) 
C31 0.055(3) 0.059(3) 0.042(2) -0.007(2) -0.022(2) -0.007(2) 
C32 0.063(3) 0.094(4) 0.063(3) -0.022(3) -0.018(3) -0.015(3) 
C33 0.064(4) 0.120(6) 0.081(4) -0.043(4) -0.012(3) 0.002(4) 
C34 0.071(4) 0.097(5) 0.082(4) -0.048(4) -0.024(3) 0.012(3) 
C35 0.061(3) 0.065(3) 0.066(3) -0.025(3) -0.031(3) 0.003(3) 
C36 0.053(3) 0.052(3) 0.049(3) -0.015(2) -0.023(2) 0.001(2) 
C37 0.052(3) 0.058(3) 0.076(4) -0.024(3) -0.026(3) 0.006(2) 
C38 0.067(4) 0.075(4) 0.099(5) -0.036(3) -0.041(3) 0.012(3) 
C39 0.076(4) 0.102(5) 0.131(6) -0.053(5) -0.059(5) 0.018(4) 
C40 0.052(4) 0.093(5) 0.169(8) -0.058(6) -0.039(5) 0.006(4) 
C41 0.060(4) 0.070(4) 0.129(6) -0.026(4) -0.015(4) 0.004(3) 
C42 0.049(3) 0.064(3) 0.097(4) -0.022(3) -0.018(3) 0.007(3) 
C43 0.049(3) 0.065(3) 0.060(3) -0.029(2) -0.026(2) 0.009(2) 
C44 0.061(3) 0.084(4) 0.087(4) -0.042(3) -0.046(3) 0.018(3) 
C45 0.049(3) 0.087(4) 0.120(6) -0.044(4) -0.044(4) 0.005(3) 
C46 0.041(3) 0.070(4) 0.102(5) -0.030(3) -0.024(3) 0.000(2) 
C47 0.038(2) 0.053(3) 0.068(3) -0.023(2) -0.018(2) 0.002(2) 
C48 0.051(3) 0.040(2) 0.062(3) -0.007(2) -0.013(2) 0.007(2) 
C49 0.062(3) 0.050(3) 0.077(4) -0.012(3) -0.012(3) 0.019(2) 
C50 0.062(3) 0.045(3) 0.095(4) -0.011(3) -0.027(3) 0.019(2) 
C51 0.067(3) 0.038(3) 0.077(4) 0.000(2) -0.032(3) 0.007(2) 
C52 0.051(3) 0.039(2) 0.053(3) -0.005(2) -0.019(2) -0.001(2) 
C53 0.063(3) 0.038(2) 0.059(3) -0.009(2) -0.025(2) -0.008(2) 
C54 0.085(4) 0.043(3) 0.085(4) -0.006(3) -0.037(3) -0.018(3) 
C55 0.084(4) 0.039(3) 0.099(5) -0.020(3) -0.044(4) -0.006(3) 
C56 0.074(3) 0.049(3) 0.074(3) -0.031(3) -0.039(3) 0.006(3) 
C57 0.049(3) 0.042(2) 0.059(3) -0.015(2) -0.025(2) 0.001(2) 
C58 0.039(2) 0.034(2) 0.043(2) -0.0150(18) -0.0103(19) -0.0059(18) 
C59 0.049(3) 0.051(3) 0.046(3) -0.004(2) -0.002(2) -0.008(2) 
C60 0.065(3) 0.047(3) 0.044(3) 0.006(2) -0.016(2) -0.019(2) 
C61 0.090(4) 0.066(3) 0.055(3) -0.004(3) -0.024(3) -0.024(3) 
C62 0.114(5) 0.082(4) 0.068(4) 0.008(3) -0.053(4) -0.024(4) 
C63 0.099(5) 0.075(4) 0.087(4) 0.018(3) -0.058(4) -0.022(4) 
C64 0.081(4) 0.053(3) 0.072(4) 0.009(3) -0.038(3) -0.011(3) 
C65 0.064(3) 0.048(3) 0.051(3) 0.006(2) -0.025(2) -0.015(2) 
C66 0.069(3) 0.056(3) 0.065(3) -0.006(3) -0.037(3) -0.005(3) 
C67 0.093(4) 0.059(3) 0.081(4) 0.006(3) -0.049(4) -0.021(3) 
C68 0.129(6) 0.065(4) 0.102(5) 0.007(4) -0.072(5) -0.028(4) 
C69 0.146(7) 0.066(4) 0.121(6) -0.022(4) -0.087(6) 0.003(5) 
C70 0.111(6) 0.100(5) 0.101(5) -0.047(5) -0.064(5) 0.020(5) 
C71 0.080(4) 0.079(4) 0.076(4) -0.024(3) -0.041(3) 0.002(3) 
C72 0.036(2) 0.032(2) 0.036(2) -0.0113(16) -0.0122(18) -0.0012(16) 
C73 0.034(2) 0.055(3) 0.042(2) -0.019(2) -0.0098(19) 0.0009(19) 
C74 0.041(2) 0.050(3) 0.036(2) -0.0202(19) -0.0054(19) 0.002(2) 
C75 0.054(3) 0.059(3) 0.048(3) -0.008(2) -0.014(2) -0.003(2) 
C76 0.064(3) 0.054(3) 0.058(3) -0.001(2) -0.011(3) -0.015(3) 
C77 0.056(3) 0.061(3) 0.063(3) -0.010(3) -0.008(3) -0.019(3) 
C78 0.039(2) 0.066(3) 0.053(3) -0.014(2) -0.009(2) -0.009(2) 
C79 0.039(2) 0.049(3) 0.045(2) -0.016(2) -0.009(2) -0.003(2) 
C80 0.046(3) 0.053(3) 0.061(3) -0.007(2) -0.015(2) -0.010(2) 
C81 0.076(4) 0.064(3) 0.064(3) 0.001(3) -0.025(3) -0.013(3) 
C82 0.088(5) 0.081(4) 0.086(5) 0.009(4) -0.045(4) -0.016(4) 
C83 0.073(4) 0.081(5) 0.125(7) 0.016(4) -0.049(5) -0.010(4) 
C84 0.057(4) 0.064(4) 0.126(6) -0.011(4) -0.024(4) 0.004(3) 
C85 0.050(3) 0.062(3) 0.081(4) -0.010(3) -0.014(3) -0.005(3) 
C86 0.033(2) 0.037(2) 0.042(2) -0.0048(18) -0.0160(18) -0.0026(17) 
C87 0.037(2) 0.050(3) 0.050(3) 0.002(2) -0.013(2) -0.0037(19) 
C88 0.034(2) 0.063(3) 0.050(3) -0.009(2) -0.010(2) 0.000(2) 
C89 0.054(3) 0.074(4) 0.055(3) -0.011(3) -0.018(2) 0.003(3) 
C90 0.068(4) 0.082(4) 0.071(4) -0.027(3) -0.018(3) 0.012(3) 
C91 0.059(3) 0.083(4) 0.078(4) -0.025(3) -0.022(3) 0.024(3) 
C92 0.063(3) 0.086(4) 0.080(4) -0.025(3) -0.035(3) 0.033(3) 
C93 0.052(3) 0.072(3) 0.062(3) -0.017(3) -0.021(3) 0.010(3) 
C94 0.062(4) 0.085(4) 0.080(4) -0.031(3) -0.035(3) 0.021(3) 
C95 0.054(3) 0.100(5) 0.086(4) -0.034(4) -0.032(3) 0.008(3) 
C96 0.080(4) 0.106(5) 0.078(4) -0.022(4) -0.032(4) -0.003(4) 
C97 0.088(5) 0.117(6) 0.089(5) -0.030(5) -0.050(4) 0.010(4) 
C98 0.060(4) 0.106(5) 0.109(5) -0.040(4) -0.045(4) 0.010(4) 
C99 0.058(3) 0.091(4) 0.090(5) -0.029(4) -0.027(3) 0.009(3) 
Cl1 0.1156(15) 0.0885(12) 0.1328(16) -0.0562(12) -0.0519(13) 0.0151(10) 
Cl2 0.0975(13) 0.1566(19) 0.1112(15) -0.0693(14) -0.0418(12) 0.0200(13) 
Cl3 0.0900(11) 0.0751(9) 0.0828(10) -0.0109(8) -0.0328(9) -0.0115(8) 
Cl4 0.0945(12) 0.1053(13) 0.0686(10) 0.0159(9) -0.0242(9) -0.0164(10) 
Cl5 0.1089(13) 0.1030(13) 0.0919(12) -0.0121(10) -0.0580(11) 0.0134(10) 
Cl6 0.0727(10) 0.0872(11) 0.0899(11) 0.0057(9) -0.0113(9) 0.0086(8) 
Cl7 0.0977(13) 0.1089(13) 0.0816(11) 0.0075(10) -0.0209(10) -0.0414(10) 
Cl8 0.0829(11) 0.1366(16) 0.0780(11) -0.0331(11) -0.0174(9) -0.0169(11) 
Cl9 0.1217(14) 0.0787(10) 0.0633(9) -0.0162(8) -0.0172(9) -0.0019(9) 
Cl10 0.0876(11) 0.0878(11) 0.0780(10) -0.0345(9) -0.0025(8) -0.0016(9) 
Cl11 0.0750(11) 0.1364(16) 0.1274(16) -0.0475(13) -0.0414(11) -0.0149(11) 
Cl12 0.0902(13) 0.1020(14) 0.1328(17) -0.0158(12) -0.0184(12) -0.0022(11) 

_refine_ls_extinction_method 
    'None'
_oxford_refine_ls_scale 0.069219(9) 
loop_
 _geom_bond_atom_site_label_1
 _geom_bond_site_symmetry_1
 _geom_bond_atom_site_label_2
 _geom_bond_site_symmetry_2
 _geom_bond_distance
 _geom_bond_publ_flag
Fe1 . O1 . 2.019(2)    yes
Fe1 . O3 . 2.018(3)    yes
Fe1 . O7 . 2.028(3)    yes
Fe1 . O9 . 2.029(2)    yes
Fe1 . O13 . 1.910(2)    yes
Fe1 . N1 . 2.157(3)    yes
Fe2 . O2 . 2.012(3)    yes
Fe2 . O6 . 2.017(3)    yes
Fe2 . O8 . 2.039(3)    yes
Fe2 . O11 . 1.995(3)    yes
Fe2 . O13 . 1.922(2)    yes
Fe2 . N2 . 2.149(3)    yes
Fe3 . O4 . 2.039(3)    yes
Fe3 . O5 . 2.021(3)    yes
Fe3 . O10 . 2.041(3)    yes
Fe3 . O12 . 2.020(3)    yes
Fe3 . O13 . 1.890(2)    yes
Fe3 . N3 . 2.179(3)    yes
O1 . C1 . 1.239(5)    yes
O2 . C1 . 1.249(5)    yes
O3 . C15 . 1.261(4)    yes
O4 . C15 . 1.254(4)    yes
O5 . C29 . 1.260(5)    yes
O6 . C29 . 1.246(5)    yes
O7 . C58 . 1.260(5)    yes
O8 . C58 . 1.257(5)    yes
O9 . C72 . 1.253(4)    yes
O10 . C72 . 1.245(5)    yes
O11 . C86 . 1.250(5)    yes
O12 . C86 . 1.262(5)    yes
N1 . C43 . 1.328(6)    yes
N1 . C47 . 1.341(6)    yes
N2 . C48 . 1.324(6)    yes
N2 . C52 . 1.338(6)    yes
N3 . C53 . 1.338(6)    yes
N3 . C57 . 1.347(5)    yes
N4 . C8 . 1.440(6)    yes
N4 . C9 . 1.386(7)    yes
N4 . H41 . 0.835    no
N5 . C22 . 1.391(6)    yes
N5 . C23 . 1.406(6)    yes
N5 . H1135 . 0.843    no
N6 . C36 . 1.401(6)    yes
N6 . C37 . 1.394(6)    yes
N6 . H61 . 0.838    no
N7 . C65 . 1.419(6)    yes
N7 . C66 . 1.402(6)    yes
N7 . H71 . 0.840    no
N8 . C79 . 1.414(6)    yes
N8 . C80 . 1.397(6)    yes
N8 . H81 . 0.846    no
N9 . C93 . 1.402(7)    yes
N9 . C94 . 1.393(7)    yes
N9 . H91 . 0.815    no
N10 . C100 . 1.349(5)    yes
N10 . C104 . 1.349(5)    yes
N11 . C105 . 1.348(5)    yes
N11 . C109 . 1.351(5)    yes
N12 . C110 . 1.351(5)    yes
N12 . C114 . 1.350(5)    yes
C1 . C2 . 1.538(5)    yes
C2 . C3 . 1.492(6)    yes
C2 . H21 . 0.957    no
C2 . H22 . 0.973    no
C3 . C4 . 1.382(7)    yes
C3 . C8 . 1.385(7)    yes
C4 . C5 . 1.383(8)    yes
C4 . H1134 . 0.926    no
C5 . C6 . 1.355(9)    yes
C5 . H51 . 0.922    no
C6 . C7 . 1.379(8)    yes
C6 . H1133 . 0.928    no
C7 . C8 . 1.377(7)    yes
C7 . H1132 . 0.919    no
C9 . C10 . 1.382(8)    yes
C9 . C14 . 1.397(8)    yes
C10 . C11 . 1.369(9)    yes
C10 . Cl1 . 1.730(6)    yes
C11 . C12 . 1.361(9)    yes
C11 . H111 . 0.914    no
C12 . C13 . 1.375(10)    yes
C12 . H121 . 0.924    no
C13 . C14 . 1.393(9)    yes
C13 . H131 . 0.922    no
C14 . Cl2 . 1.695(7)    yes
C15 . C16 . 1.513(5)    yes
C16 . C17 . 1.493(6)    yes
C16 . H161 . 0.953    no
C16 . H162 . 0.959    no
C17 . C18 . 1.399(6)    yes
C17 . C22 . 1.396(6)    yes
C18 . C19 . 1.376(6)    yes
C18 . H181 . 0.932    no
C19 . C20 . 1.362(7)    yes
C19 . H191 . 0.927    no
C20 . C21 . 1.397(7)    yes
C20 . H201 . 0.940    no
C21 . C22 . 1.380(6)    yes
C21 . H211 . 0.932    no
C23 . C24 . 1.409(7)    yes
C23 . C28 . 1.390(8)    yes
C24 . C25 . 1.386(8)    yes
C24 . Cl3 . 1.733(6)    yes
C25 . C26 . 1.328(9)    yes
C25 . H251 . 0.921    no
C26 . C27 . 1.374(9)    yes
C26 . H261 . 0.928    no
C27 . C28 . 1.385(8)    yes
C27 . H271 . 0.929    no
C28 . Cl4 . 1.713(6)    yes
C29 . C30 . 1.509(6)    yes
C30 . C31 . 1.493(6)    yes
C30 . H301 . 0.962    no
C30 . H302 . 0.969    no
C31 . C32 . 1.385(7)    yes
C31 . C36 . 1.388(6)    yes
C32 . C33 . 1.396(8)    yes
C32 . H321 . 0.923    no
C33 . C34 . 1.359(9)    yes
C33 . H331 . 0.925    no
C34 . C35 . 1.358(7)    yes
C34 . H341 . 0.937    no
C35 . C36 . 1.391(6)    yes
C35 . H351 . 0.921    no
C37 . C38 . 1.404(8)    yes
C37 . C42 . 1.386(8)    yes
C38 . C39 . 1.410(9)    yes
C38 . Cl5 . 1.695(7)    yes
C39 . C40 . 1.368(11)    yes
C39 . H391 . 0.932    no
C40 . C41 . 1.359(11)    yes
C40 . H401 . 0.928    no
C41 . C42 . 1.402(9)    yes
C41 . H411 . 0.930    no
C42 . Cl6 . 1.725(7)    yes
C43 . C44 . 1.386(7)    yes
C43 . H431 . 0.926    no
C44 . C45 . 1.354(8)    yes
C44 . H441 . 0.916    no
C45 . C46 . 1.335(8)    yes
C45 . H451 . 0.924    no
C46 . C47 . 1.367(7)    yes
C46 . H461 . 0.931    no
C47 . H471 . 0.927    no
C48 . C49 . 1.379(6)    yes
C48 . H481 . 0.923    no
C49 . C50 . 1.368(8)    yes
C49 . H491 . 0.933    no
C50 . C51 . 1.362(7)    yes
C50 . H501 . 0.931    no
C51 . C52 . 1.384(6)    yes
C51 . H511 . 0.918    no
C52 . H521 . 0.933    no
C53 . C54 . 1.371(6)    yes
C53 . H531 . 0.935    no
C54 . C55 . 1.359(8)    yes
C54 . H541 . 0.924    no
C55 . C56 . 1.338(8)    yes
C55 . H551 . 0.921    no
C56 . C57 . 1.376(6)    yes
C56 . H561 . 0.921    no
C57 . H571 . 0.928    no
C58 . C59 . 1.489(6)    yes
C59 . C60 . 1.497(7)    yes
C59 . H591 . 0.967    no
C59 . H592 . 0.954    no
C60 . C61 . 1.395(7)    yes
C60 . C65 . 1.392(7)    yes
C61 . C62 . 1.364(8)    yes
C61 . H611 . 0.926    no
C62 . C63 . 1.361(9)    yes
C62 . H621 . 0.925    no
C63 . C64 . 1.386(8)    yes
C63 . H631 . 0.927    no
C64 . C65 . 1.388(7)    yes
C64 . H641 . 0.931    no
C66 . C67 . 1.408(8)    yes
C66 . C71 . 1.381(8)    yes
C67 . C68 . 1.389(8)    yes
C67 . Cl7 . 1.706(7)    yes
C68 . C69 . 1.368(10)    yes
C68 . H681 . 0.936    no
C69 . C70 . 1.369(10)    yes
C69 . H691 . 0.934    no
C70 . C71 . 1.392(9)    yes
C70 . H701 . 0.922    no
C71 . Cl8 . 1.725(7)    yes
C72 . C73 . 1.514(5)    yes
C73 . C74 . 1.500(6)    yes
C73 . H731 . 0.980    no
C73 . H732 . 0.975    no
C74 . C75 . 1.382(6)    yes
C74 . C79 . 1.405(6)    yes
C75 . C76 . 1.385(7)    yes
C75 . H751 . 0.928    no
C76 . C77 . 1.353(8)    yes
C76 . H761 . 0.927    no
C77 . C78 . 1.372(7)    yes
C77 . H771 . 0.930    no
C78 . C79 . 1.389(6)    yes
C78 . H781 . 0.931    no
C80 . C81 . 1.394(7)    yes
C80 . C85 . 1.397(7)    yes
C81 . C82 . 1.385(8)    yes
C81 . Cl9 . 1.721(6)    yes
C82 . C83 . 1.375(10)    yes
C82 . H821 . 0.915    no
C83 . C84 . 1.381(10)    yes
C83 . H831 . 0.921    no
C84 . C85 . 1.388(8)    yes
C84 . H841 . 0.925    no
C85 . Cl10 . 1.707(6)    yes
C86 . C87 . 1.510(6)    yes
C87 . C88 . 1.506(6)    yes
C87 . H871 . 0.959    no
C87 . H872 . 0.940    no
C88 . C89 . 1.376(7)    yes
C88 . C93 . 1.390(7)    yes
C89 . C90 . 1.387(7)    yes
C89 . H891 . 0.914    no
C90 . C91 . 1.361(8)    yes
C90 . H901 . 0.926    no
C91 . C92 . 1.383(8)    yes
C91 . H911 . 0.918    no
C92 . C93 . 1.381(7)    yes
C92 . H921 . 0.925    no
C94 . C95 . 1.395(9)    yes
C94 . C99 . 1.383(8)    yes
C95 . C96 . 1.375(9)    yes
C95 . Cl11 . 1.720(6)    yes
C96 . C97 . 1.369(9)    yes
C96 . H961 . 0.936    no
C97 . C98 . 1.364(10)    yes
C97 . H971 . 0.937    no
C98 . C99 . 1.371(9)    yes
C98 . H981 . 0.922    no
C99 . Cl12 . 1.724(7)    yes
C100 . C101 . 1.399(5)    yes
C100 . H1001 . 0.950    no
C101 . C102 . 1.397(5)    yes
C101 . H1011 . 0.950    no
C102 . C103 . 1.398(5)    yes
C102 . H1021 . 0.950    no
C103 . C104 . 1.396(5)    yes
C103 . H1031 . 0.783    no
C104 . H1041 . 0.950    no
C105 . C106 . 1.398(5)    yes
C105 . H1051 . 0.950    no
C106 . C107 . 1.399(5)    yes
C106 . H1061 . 0.950    no
C107 . C108 . 1.401(5)    yes
C107 . H1071 . 0.950    no
C108 . C109 . 1.402(5)    yes
C108 . H1081 . 0.950    no
C109 . H1091 . 0.950    no
C110 . C111 . 1.400(5)    yes
C110 . H1101 . 0.950    no
C111 . C112 . 1.402(5)    yes
C111 . H1111 . 0.950    no
C112 . C113 . 1.402(5)    yes
C112 . H1121 . 0.950    no
C113 . C114 . 1.402(5)    yes
C113 . H1131 . 0.950    no
C114 . H1141 . 0.950    no
loop_
 _geom_angle_atom_site_label_1
 _geom_angle_site_symmetry_1
 _geom_angle_atom_site_label_2
 _geom_angle_site_symmetry_2
 _geom_angle_atom_site_label_3
 _geom_angle_site_symmetry_3
 _geom_angle
 _geom_angle_publ_flag
O1 . Fe1 . O3 . 90.83(11)    yes
O1 . Fe1 . O7 . 95.00(12)    yes
O3 . Fe1 . O7 . 171.83(11)    yes
O1 . Fe1 . O9 . 168.85(11)    yes
O3 . Fe1 . O9 . 88.68(11)    yes
O7 . Fe1 . O9 . 84.50(11)    yes
O1 . Fe1 . O13 . 94.51(11)    yes
O3 . Fe1 . O13 . 93.93(11)    yes
O7 . Fe1 . O13 . 91.33(11)    yes
O9 . Fe1 . O13 . 96.64(10)    yes
O1 . Fe1 . N1 . 82.49(12)    yes
O3 . Fe1 . N1 . 88.36(13)    yes
O7 . Fe1 . N1 . 86.73(13)    yes
O9 . Fe1 . N1 . 86.36(11)    yes
O13 . Fe1 . N1 . 176.26(12)    yes
O2 . Fe2 . O6 . 170.94(11)    yes
O2 . Fe2 . O8 . 89.49(11)    yes
O6 . Fe2 . O8 . 84.62(11)    yes
O2 . Fe2 . O11 . 89.98(12)    yes
O6 . Fe2 . O11 . 94.98(12)    yes
O8 . Fe2 . O11 . 172.72(11)    yes
O2 . Fe2 . O13 . 95.22(11)    yes
O6 . Fe2 . O13 . 92.08(11)    yes
O8 . Fe2 . O13 . 94.08(11)    yes
O11 . Fe2 . O13 . 93.20(11)    yes
O2 . Fe2 . N2 . 86.59(13)    yes
O6 . Fe2 . N2 . 86.26(12)    yes
O8 . Fe2 . N2 . 87.36(12)    yes
O11 . Fe2 . N2 . 85.37(12)    yes
O13 . Fe2 . N2 . 177.70(12)    yes
O4 . Fe3 . O5 . 170.17(10)    yes
O4 . Fe3 . O10 . 92.54(11)    yes
O5 . Fe3 . O10 . 85.99(11)    yes
O4 . Fe3 . O12 . 90.80(11)    yes
O5 . Fe3 . O12 . 89.24(11)    yes
O10 . Fe3 . O12 . 170.68(11)    yes
O4 . Fe3 . O13 . 93.68(10)    yes
O5 . Fe3 . O13 . 96.09(11)    yes
O10 . Fe3 . O13 . 92.66(11)    yes
O12 . Fe3 . O13 . 95.80(11)    yes
O4 . Fe3 . N3 . 83.76(12)    yes
O5 . Fe3 . N3 . 86.43(12)    yes
O10 . Fe3 . N3 . 84.99(12)    yes
O12 . Fe3 . N3 . 86.73(12)    yes
O13 . Fe3 . N3 . 176.44(12)    yes
Fe1 . O1 . C1 . 135.4(3)    yes
Fe2 . O2 . C1 . 126.2(3)    yes
Fe1 . O3 . C15 . 127.1(2)    yes
Fe3 . O4 . C15 . 135.0(2)    yes
Fe3 . O5 . C29 . 130.2(3)    yes
Fe2 . O6 . C29 . 130.3(3)    yes
Fe1 . O7 . C58 . 128.0(3)    yes
Fe2 . O8 . C58 . 128.2(2)    yes
Fe1 . O9 . C72 . 128.5(2)    yes
Fe3 . O10 . C72 . 129.3(2)    yes
Fe2 . O11 . C86 . 136.9(3)    yes
Fe3 . O12 . C86 . 127.2(2)    yes
Fe2 . O13 . Fe1 . 119.54(12)    yes
Fe2 . O13 . Fe3 . 120.05(13)    yes
Fe1 . O13 . Fe3 . 120.29(13)    yes
Fe1 . N1 . C43 . 121.3(3)    yes
Fe1 . N1 . C47 . 120.8(3)    yes
C43 . N1 . C47 . 117.8(4)    yes
Fe2 . N2 . C48 . 121.0(3)    yes
Fe2 . N2 . C52 . 122.5(3)    yes
C48 . N2 . C52 . 116.5(4)    yes
Fe3 . N3 . C53 . 121.4(3)    yes
Fe3 . N3 . C57 . 120.7(3)    yes
C53 . N3 . C57 . 117.9(4)    yes
C8 . N4 . C9 . 120.6(4)    yes
C8 . N4 . H41 . 118.4    no
C9 . N4 . H41 . 116.6    no
C22 . N5 . C23 . 121.1(4)    yes
C22 . N5 . H1135 . 119.4    no
C23 . N5 . H1135 . 119.5    no
C36 . N6 . C37 . 120.8(4)    yes
C36 . N6 . H61 . 117.5    no
C37 . N6 . H61 . 119.6    no
C65 . N7 . C66 . 120.7(4)    yes
C65 . N7 . H71 . 117.0    no
C66 . N7 . H71 . 118.1    no
C79 . N8 . C80 . 121.9(4)    yes
C79 . N8 . H81 . 116.7    no
C80 . N8 . H81 . 116.3    no
C93 . N9 . C94 . 123.0(5)    yes
C93 . N9 . H91 . 137.9    no
C94 . N9 . H91 . 98.7    no
C100 . N10 . C104 . 116(3)    yes
C105 . N11 . C109 . 120(2)    yes
C110 . N12 . C114 . 120.9(11)    yes
O2 . C1 . O1 . 126.8(4)    yes
O2 . C1 . C2 . 115.8(4)    yes
O1 . C1 . C2 . 117.4(4)    yes
C1 . C2 . C3 . 115.9(4)    yes
C1 . C2 . H21 . 107.3    no
C3 . C2 . H21 . 108.9    no
C1 . C2 . H22 . 107.7    no
C3 . C2 . H22 . 108.2    no
H21 . C2 . H22 . 108.7    no
C2 . C3 . C4 . 121.8(5)    yes
C2 . C3 . C8 . 121.3(5)    yes
C4 . C3 . C8 . 116.8(5)    yes
C3 . C4 . C5 . 122.4(6)    yes
C3 . C4 . H1134 . 117.8    no
C5 . C4 . H1134 . 119.7    no
C4 . C5 . C6 . 119.6(6)    yes
C4 . C5 . H51 . 119.9    no
C6 . C5 . H51 . 120.5    no
C5 . C6 . C7 . 119.5(5)    yes
C5 . C6 . H1133 . 119.8    no
C7 . C6 . H1133 . 120.7    no
C6 . C7 . C8 . 120.7(6)    yes
C6 . C7 . H1132 . 120.1    no
C8 . C7 . H1132 . 119.2    no
N4 . C8 . C3 . 118.3(4)    yes
N4 . C8 . C7 . 120.7(5)    yes
C3 . C8 . C7 . 121.0(5)    yes
N4 . C9 . C10 . 120.6(5)    yes
N4 . C9 . C14 . 122.1(6)    yes
C10 . C9 . C14 . 117.3(6)    yes
C9 . C10 . C11 . 123.2(6)    yes
C9 . C10 . Cl1 . 120.1(5)    yes
C11 . C10 . Cl1 . 116.7(5)    yes
C10 . C11 . C12 . 118.1(7)    yes
C10 . C11 . H111 . 120.4    no
C12 . C11 . H111 . 121.5    no
C11 . C12 . C13 . 121.9(7)    yes
C11 . C12 . H121 . 118.7    no
C13 . C12 . H121 . 119.3    no
C12 . C13 . C14 . 119.1(6)    yes
C12 . C13 . H131 . 120.3    no
C14 . C13 . H131 . 120.6    no
C9 . C14 . C13 . 120.4(6)    yes
C9 . C14 . Cl2 . 118.8(5)    yes
C13 . C14 . Cl2 . 120.9(5)    yes
O3 . C15 . O4 . 125.3(4)    yes
O3 . C15 . C16 . 116.5(3)    yes
O4 . C15 . C16 . 118.2(3)    yes
C15 . C16 . C17 . 117.4(3)    yes
C15 . C16 . H161 . 106.8    no
C17 . C16 . H161 . 108.2    no
C15 . C16 . H162 . 107.3    no
C17 . C16 . H162 . 107.7    no
H161 . C16 . H162 . 109.3    no
C16 . C17 . C18 . 121.2(4)    yes
C16 . C17 . C22 . 120.2(4)    yes
C18 . C17 . C22 . 118.4(4)    yes
C17 . C18 . C19 . 121.2(4)    yes
C17 . C18 . H181 . 119.6    no
C19 . C18 . H181 . 119.3    no
C18 . C19 . C20 . 120.4(4)    yes
C18 . C19 . H191 . 118.8    no
C20 . C19 . H191 . 120.8    no
C19 . C20 . C21 . 119.2(4)    yes
C19 . C20 . H201 . 120.6    no
C21 . C20 . H201 . 120.2    no
C20 . C21 . C22 . 121.2(4)    yes
C20 . C21 . H211 . 119.9    no
C22 . C21 . H211 . 118.9    no
C17 . C22 . N5 . 119.2(4)    yes
C17 . C22 . C21 . 119.5(4)    yes
N5 . C22 . C21 . 121.3(4)    yes
N5 . C23 . C24 . 121.5(5)    yes
N5 . C23 . C28 . 121.7(5)    yes
C24 . C23 . C28 . 116.8(5)    yes
C23 . C24 . C25 . 120.8(6)    yes
C23 . C24 . Cl3 . 119.2(4)    yes
C25 . C24 . Cl3 . 120.0(5)    yes
C24 . C25 . C26 . 120.6(6)    yes
C24 . C25 . H251 . 119.9    no
C26 . C25 . H251 . 119.5    no
C25 . C26 . C27 . 121.0(6)    yes
C25 . C26 . H261 . 119.0    no
C27 . C26 . H261 . 120.0    no
C26 . C27 . C28 . 119.6(6)    yes
C26 . C27 . H271 . 121.1    no
C28 . C27 . H271 . 119.3    no
C23 . C28 . C27 . 121.2(6)    yes
C23 . C28 . Cl4 . 118.4(4)    yes
C27 . C28 . Cl4 . 120.4(5)    yes
O5 . C29 . O6 . 124.9(4)    yes
O5 . C29 . C30 . 118.1(3)    yes
O6 . C29 . C30 . 117.0(4)    yes
C29 . C30 . C31 . 115.5(4)    yes
C29 . C30 . H301 . 108.1    no
C31 . C30 . H301 . 107.7    no
C29 . C30 . H302 . 106.4    no
C31 . C30 . H302 . 109.0    no
H301 . C30 . H302 . 110.0    no
C30 . C31 . C32 . 121.2(5)    yes
C30 . C31 . C36 . 120.9(4)    yes
C32 . C31 . C36 . 117.8(5)    yes
C31 . C32 . C33 . 121.0(5)    yes
C31 . C32 . H321 . 118.2    no
C33 . C32 . H321 . 120.8    no
C32 . C33 . C34 . 120.4(6)    yes
C32 . C33 . H331 . 120.2    no
C34 . C33 . H331 . 119.3    no
C33 . C34 . C35 . 119.0(6)    yes
C33 . C34 . H341 . 121.3    no
C35 . C34 . H341 . 119.8    no
C34 . C35 . C36 . 122.0(5)    yes
C34 . C35 . H351 . 118.6    no
C36 . C35 . H351 . 119.4    no
N6 . C36 . C35 . 121.6(4)    yes
N6 . C36 . C31 . 118.8(4)    yes
C35 . C36 . C31 . 119.7(5)    yes
N6 . C37 . C38 . 119.9(5)    yes
N6 . C37 . C42 . 121.7(5)    yes
C38 . C37 . C42 . 118.3(5)    yes
C37 . C38 . C39 . 120.3(7)    yes
C37 . C38 . Cl5 . 120.9(5)    yes
C39 . C38 . Cl5 . 118.8(6)    yes
C38 . C39 . C40 . 117.6(7)    yes
C38 . C39 . H391 . 121.1    no
C40 . C39 . H391 . 121.3    no
C39 . C40 . C41 . 124.6(7)    yes
C39 . C40 . H401 . 118.4    no
C41 . C40 . H401 . 116.9    no
C40 . C41 . C42 . 117.0(7)    yes
C40 . C41 . H411 . 121.6    no
C42 . C41 . H411 . 121.4    no
C41 . C42 . C37 . 122.0(6)    yes
C41 . C42 . Cl6 . 118.9(6)    yes
C37 . C42 . Cl6 . 119.1(4)    yes
N1 . C43 . C44 . 122.0(5)    yes
N1 . C43 . H431 . 118.6    no
C44 . C43 . H431 . 119.3    no
C43 . C44 . C45 . 118.4(5)    yes
C43 . C44 . H441 . 120.1    no
C45 . C44 . H441 . 121.4    no
C44 . C45 . C46 . 120.2(5)    yes
C44 . C45 . H451 . 119.3    no
C46 . C45 . H451 . 120.5    no
C45 . C46 . C47 . 119.4(6)    yes
C45 . C46 . H461 . 120.3    no
C47 . C46 . H461 . 120.3    no
C46 . C47 . N1 . 122.1(5)    yes
C46 . C47 . H471 . 119.5    no
N1 . C47 . H471 . 118.4    no
N2 . C48 . C49 . 124.3(5)    yes
N2 . C48 . H481 . 117.8    no
C49 . C48 . H481 . 117.8    no
C48 . C49 . C50 . 117.8(5)    yes
C48 . C49 . H491 . 120.0    no
C50 . C49 . H491 . 122.1    no
C49 . C50 . C51 . 119.7(5)    yes
C49 . C50 . H501 . 119.7    no
C51 . C50 . H501 . 120.6    no
C50 . C51 . C52 . 118.5(5)    yes
C50 . C51 . H511 . 121.7    no
C52 . C51 . H511 . 119.8    no
C51 . C52 . N2 . 123.2(5)    yes
C51 . C52 . H521 . 119.3    no
N2 . C52 . H521 . 117.5    no
N3 . C53 . C54 . 121.1(5)    yes
N3 . C53 . H531 . 118.9    no
C54 . C53 . H531 . 120.0    no
C53 . C54 . C55 . 120.1(5)    yes
C53 . C54 . H541 . 119.4    no
C55 . C54 . H541 . 120.5    no
C54 . C55 . C56 . 119.6(5)    yes
C54 . C55 . H551 . 120.6    no
C56 . C55 . H551 . 119.8    no
C55 . C56 . C57 . 119.1(5)    yes
C55 . C56 . H561 . 120.3    no
C57 . C56 . H561 . 120.6    no
C56 . C57 . N3 . 122.2(5)    yes
C56 . C57 . H571 . 118.9    no
N3 . C57 . H571 . 118.9    no
O7 . C58 . O8 . 123.9(4)    yes
O7 . C58 . C59 . 116.9(4)    yes
O8 . C58 . C59 . 119.2(4)    yes
C58 . C59 . C60 . 116.3(4)    yes
C58 . C59 . H591 . 107.6    no
C60 . C59 . H591 . 108.9    no
C58 . C59 . H592 . 106.5    no
C60 . C59 . H592 . 108.4    no
H591 . C59 . H592 . 109.0    no
C59 . C60 . C61 . 122.1(5)    yes
C59 . C60 . C65 . 120.0(4)    yes
C61 . C60 . C65 . 117.9(5)    yes
C60 . C61 . C62 . 121.4(6)    yes
C60 . C61 . H611 . 119.0    no
C62 . C61 . H611 . 119.6    no
C61 . C62 . C63 . 120.9(6)    yes
C61 . C62 . H621 . 118.9    no
C63 . C62 . H621 . 120.2    no
C62 . C63 . C64 . 119.1(6)    yes
C62 . C63 . H631 . 120.7    no
C64 . C63 . H631 . 120.2    no
C63 . C64 . C65 . 120.8(6)    yes
C63 . C64 . H641 . 119.8    no
C65 . C64 . H641 . 119.4    no
N7 . C65 . C60 . 119.6(4)    yes
N7 . C65 . C64 . 120.5(5)    yes
C60 . C65 . C64 . 119.8(5)    yes
N7 . C66 . C67 . 119.4(5)    yes
N7 . C66 . C71 . 122.5(5)    yes
C67 . C66 . C71 . 118.1(5)    yes
C66 . C67 . C68 . 120.8(6)    yes
C66 . C67 . Cl7 . 119.8(4)    yes
C68 . C67 . Cl7 . 119.4(5)    yes
C67 . C68 . C69 . 119.0(7)    yes
C67 . C68 . H681 . 120.3    no
C69 . C68 . H681 . 120.8    no
C68 . C69 . C70 . 121.8(7)    yes
C68 . C69 . H691 . 119.4    no
C70 . C69 . H691 . 118.8    no
C69 . C70 . C71 . 119.1(7)    yes
C69 . C70 . H701 . 120.6    no
C71 . C70 . H701 . 120.3    no
C70 . C71 . C66 . 121.0(6)    yes
C70 . C71 . Cl8 . 120.3(6)    yes
C66 . C71 . Cl8 . 118.7(5)    yes
O9 . C72 . O10 . 124.8(3)    yes
O9 . C72 . C73 . 118.8(3)    yes
O10 . C72 . C73 . 116.4(3)    yes
C72 . C73 . C74 . 116.8(3)    yes
C72 . C73 . H731 . 106.9    no
C74 . C73 . H731 . 108.5    no
C72 . C73 . H732 . 108.0    no
C74 . C73 . H732 . 108.2    no
H731 . C73 . H732 . 108.3    no
C73 . C74 . C75 . 120.9(4)    yes
C73 . C74 . C79 . 120.8(4)    yes
C75 . C74 . C79 . 118.1(4)    yes
C74 . C75 . C76 . 121.2(5)    yes
C74 . C75 . H751 . 118.8    no
C76 . C75 . H751 . 120.0    no
C75 . C76 . C77 . 120.5(5)    yes
C75 . C76 . H761 . 119.3    no
C77 . C76 . H761 . 120.1    no
C76 . C77 . C78 . 119.4(5)    yes
C76 . C77 . H771 . 119.5    no
C78 . C77 . H771 . 121.1    no
C77 . C78 . C79 . 121.5(5)    yes
C77 . C78 . H781 . 118.9    no
C79 . C78 . H781 . 119.6    no
N8 . C79 . C74 . 118.9(4)    yes
N8 . C79 . C78 . 122.0(4)    yes
C74 . C79 . C78 . 119.1(4)    yes
N8 . C80 . C81 . 120.7(5)    yes
N8 . C80 . C85 . 122.1(5)    yes
C81 . C80 . C85 . 117.2(5)    yes
C80 . C81 . C82 . 122.5(6)    yes
C80 . C81 . Cl9 . 119.3(4)    yes
C82 . C81 . Cl9 . 118.1(5)    yes
C81 . C82 . C83 . 117.6(6)    yes
C81 . C82 . H821 . 120.8    no
C83 . C82 . H821 . 121.7    no
C82 . C83 . C84 . 122.9(6)    yes
C82 . C83 . H831 . 118.8    no
C84 . C83 . H831 . 118.2    no
C83 . C84 . C85 . 117.8(6)    yes
C83 . C84 . H841 . 121.6    no
C85 . C84 . H841 . 120.6    no
C80 . C85 . C84 . 121.9(6)    yes
C80 . C85 . Cl10 . 119.4(4)    yes
C84 . C85 . Cl10 . 118.7(5)    yes
O12 . C86 . O11 . 125.6(4)    yes
O12 . C86 . C87 . 116.6(4)    yes
O11 . C86 . C87 . 117.7(4)    yes
C86 . C87 . C88 . 114.0(4)    yes
C86 . C87 . H871 . 107.6    no
C88 . C87 . H871 . 108.8    no
C86 . C87 . H872 . 102.6    no
C88 . C87 . H872 . 107.7    no
H871 . C87 . H872 . 116.3    no
C87 . C88 . C89 . 121.1(4)    yes
C87 . C88 . C93 . 121.5(4)    yes
C89 . C88 . C93 . 117.4(5)    yes
C88 . C89 . C90 . 122.6(5)    yes
C88 . C89 . H891 . 119.1    no
C90 . C89 . H891 . 118.4    no
C89 . C90 . C91 . 119.3(5)    yes
C89 . C90 . H901 . 119.7    no
C91 . C90 . H901 . 121.0    no
C90 . C91 . C92 . 119.5(5)    yes
C90 . C91 . H911 . 119.6    no
C92 . C91 . H911 . 120.9    no
C91 . C92 . C93 . 120.9(5)    yes
C91 . C92 . H921 . 119.2    no
C93 . C92 . H921 . 119.8    no
N9 . C93 . C88 . 117.6(5)    yes
N9 . C93 . C92 . 122.1(5)    yes
C88 . C93 . C92 . 120.3(5)    yes
N9 . C94 . C95 . 121.4(6)    yes
N9 . C94 . C99 . 122.6(7)    yes
C95 . C94 . C99 . 115.9(6)    yes
C94 . C95 . C96 . 122.8(6)    yes
C94 . C95 . Cl11 . 119.1(5)    yes
C96 . C95 . Cl11 . 118.1(6)    yes
C95 . C96 . C97 . 118.6(7)    yes
C95 . C96 . H961 . 120.8    no
C97 . C96 . H961 . 120.6    no
C96 . C97 . C98 . 120.6(7)    yes
C96 . C97 . H971 . 119.7    no
C98 . C97 . H971 . 119.7    no
C97 . C98 . C99 . 119.9(6)    yes
C97 . C98 . H981 . 121.1    no
C99 . C98 . H981 . 118.9    no
C94 . C99 . C98 . 122.1(7)    yes
C94 . C99 . Cl12 . 119.3(5)    yes
C98 . C99 . Cl12 . 118.6(5)    yes
N10 . C100 . C101 . 125.2(18)    yes
N10 . C100 . H1001 . 116.8    no
C101 . C100 . H1001 . 118.0    no
C100 . C101 . C102 . 117.7(9)    yes
C100 . C101 . H1011 . 120.7    no
C102 . C101 . H1011 . 121.6    no
C101 . C102 . C103 . 118.4(9)    yes
C101 . C102 . H1021 . 120.3    no
C103 . C102 . H1021 . 121.3    no
C102 . C103 . C104 . 118.9(18)    yes
C102 . C103 . H1031 . 119.5    no
C104 . C103 . H1031 . 121.5    no
C103 . C104 . N10 . 124(3)    yes
C103 . C104 . H1041 . 117.5    no
N10 . C104 . H1041 . 118.4    no
N11 . C105 . C106 . 121(3)    yes
N11 . C105 . H1051 . 119.2    no
C106 . C105 . H1051 . 119.4    no
C105 . C106 . C107 . 120(3)    yes
C105 . C106 . H1061 . 119.7    no
C107 . C106 . H1061 . 119.9    no
C106 . C107 . C108 . 117(2)    yes
C106 . C107 . H1071 . 121.3    no
C108 . C107 . H1071 . 121.5    no
C107 . C108 . C109 . 120.2(9)    yes
C107 . C108 . H1081 . 119.8    no
C109 . C108 . H1081 . 120.0    no
C108 . C109 . N11 . 121.2(9)    yes
C108 . C109 . H1091 . 119.3    no
N11 . C109 . H1091 . 119.5    no
N12 . C110 . C111 . 121.0(8)    yes
N12 . C110 . H1101 . 119.5    no
C111 . C110 . H1101 . 119.5    no
C110 . C111 . C112 . 119.9(8)    yes
C110 . C111 . H1111 . 120.1    no
C112 . C111 . H1111 . 120.1    no
C111 . C112 . C113 . 117.4(10)    yes
C111 . C112 . H1121 . 121.3    no
C113 . C112 . H1121 . 121.3    no
C112 . C113 . C114 . 120.9(8)    yes
C112 . C113 . H1131 . 119.6    no
C114 . C113 . H1131 . 119.5    no
C113 . C114 . N12 . 119.9(8)    yes
C113 . C114 . H1141 . 120.1    no
N12 . C114 . H1141 . 120.0    no
loop_
 _geom_hbond_atom_site_label_D
 _geom_hbond_site_symmetry_D
 _geom_hbond_atom_site_label_H
 _geom_hbond_site_symmetry_H
 _geom_hbond_atom_site_label_A
 _geom_hbond_site_symmetry_A
 _geom_hbond_angle_DHA
 _geom_hbond_distance_DH
 _geom_hbond_distance_HA
 _geom_hbond_distance_DA
 _geom_hbond_publ_flag
N6 . H61 . O5 . 127 0.84 2.56 3.143(5)    yes
N7 . H71 . O8 . 132 0.84 2.38 3.005(5)    yes
N8 . H81 . O9 . 133 0.85 2.46 3.097(5)    yes
N5 . H1135 . O4 . 127 0.84 2.54 3.123(5)    yes
N5 . H1135 . C15 . 129 0.84 2.54 3.145(5)    yes
C111 2_566 H1141 . C113 . 139 1.01 2.05 2.893(5)    yes


_iucr_refine_instructions_details
;
#
# Punched on 22/02/23 at 13:12:09
#
#LIST     12                                                                    
BLOCK 
CONT SCALE 
CONT FE   (     1 ,X'S,U'S)  UNTIL N    (     9 ) 
CONT N    (    10 ,X'S,U[ISO])  UNTIL N    (    12 ) 
CONT C    (     1 ,X'S,U'S)  UNTIL C    (    99 ) 
CONT C    (   100 ,X'S,U[ISO])  UNTIL C    (   114 ) 
CONT CL   (     1 ,X'S,U'S)  UNTIL CL   (    12 ) 
CONT CL   (    13 ,X'S,U[ISO])  UNTIL CL   (    18 ) 
RIDE N   (   4,X'S) H   (  41,X'S) 
RIDE N   (   5,X'S) H   (1135,X'S) 
RIDE N   (   6,X'S) H   (  61,X'S) 
RIDE N   (   7,X'S) H   (  71,X'S) 
RIDE N   (   8,X'S) H   (  81,X'S) 
RIDE N   (   9,X'S) H   (  91,X'S) 
RIDE C   (   2,X'S) H   (  21,X'S) H   (  22,X'S) 
RIDE C   (   4,X'S) H   (1134,X'S) 
RIDE C   (   5,X'S) H   (  51,X'S) 
RIDE C   (   6,X'S) H   (1133,X'S) 
RIDE C   (   7,X'S) H   (1132,X'S) 
RIDE C   (  11,X'S) H   ( 111,X'S) 
RIDE C   (  12,X'S) H   ( 121,X'S) 
RIDE C   (  13,X'S) H   ( 131,X'S) 
RIDE C   (  16,X'S) H   ( 161,X'S) H   ( 162,X'S) 
RIDE C   (  18,X'S) H   ( 181,X'S) 
RIDE C   (  19,X'S) H   ( 191,X'S) 
RIDE C   (  20,X'S) H   ( 201,X'S) 
RIDE C   (  21,X'S) H   ( 211,X'S) 
RIDE C   (  25,X'S) H   ( 251,X'S) 
RIDE C   (  26,X'S) H   ( 261,X'S) 
RIDE C   (  27,X'S) H   ( 271,X'S) 
RIDE C   (  30,X'S) H   ( 301,X'S) H   ( 302,X'S) 
RIDE C   (  32,X'S) H   ( 321,X'S) 
RIDE C   (  33,X'S) H   ( 331,X'S) 
RIDE C   (  34,X'S) H   ( 341,X'S) 
RIDE C   (  35,X'S) H   ( 351,X'S) 
RIDE C   (  39,X'S) H   ( 391,X'S) 
RIDE C   (  40,X'S) H   ( 401,X'S) 
RIDE C   (  41,X'S) H   ( 411,X'S) 
RIDE C   (  43,X'S) H   ( 431,X'S) 
RIDE C   (  44,X'S) H   ( 441,X'S) 
RIDE C   (  45,X'S) H   ( 451,X'S) 
RIDE C   (  46,X'S) H   ( 461,X'S) 
RIDE C   (  47,X'S) H   ( 471,X'S) 
RIDE C   (  48,X'S) H   ( 481,X'S) 
RIDE C   (  49,X'S) H   ( 491,X'S) 
RIDE C   (  50,X'S) H   ( 501,X'S) 
RIDE C   (  51,X'S) H   ( 511,X'S) 
RIDE C   (  52,X'S) H   ( 521,X'S) 
RIDE C   (  53,X'S) H   ( 531,X'S) 
RIDE C   (  54,X'S) H   ( 541,X'S) 
RIDE C   (  55,X'S) H   ( 551,X'S) 
RIDE C   (  56,X'S) H   ( 561,X'S) 
RIDE C   (  57,X'S) H   ( 571,X'S) 
RIDE C   (  59,X'S) H   ( 591,X'S) H   ( 592,X'S) 
RIDE C   (  61,X'S) H   ( 611,X'S) 
RIDE C   (  62,X'S) H   ( 621,X'S) 
RIDE C   (  63,X'S) H   ( 631,X'S) 
RIDE C   (  64,X'S) H   ( 641,X'S) 
RIDE C   (  68,X'S) H   ( 681,X'S) 
RIDE C   (  69,X'S) H   ( 691,X'S) 
RIDE C   (  70,X'S) H   ( 701,X'S) 
RIDE C   (  73,X'S) H   ( 731,X'S) H   ( 732,X'S) 
RIDE C   (  75,X'S) H   ( 751,X'S) 
RIDE C   (  76,X'S) H   ( 761,X'S) 
RIDE C   (  77,X'S) H   ( 771,X'S) 
RIDE C   (  78,X'S) H   ( 781,X'S) 
RIDE C   (  82,X'S) H   ( 821,X'S) 
RIDE C   (  83,X'S) H   ( 831,X'S) 
RIDE C   (  84,X'S) H   ( 841,X'S) 
RIDE C   (  87,X'S) H   ( 871,X'S) H   ( 872,X'S) 
RIDE C   (  89,X'S) H   ( 891,X'S) 
RIDE C   (  90,X'S) H   ( 901,X'S) 
RIDE C   (  91,X'S) H   ( 911,X'S) 
RIDE C   (  92,X'S) H   ( 921,X'S) 
RIDE C   (  96,X'S) H   ( 961,X'S) 
RIDE C   (  97,X'S) H   ( 971,X'S) 
RIDE C   (  98,X'S) H   ( 981,X'S) 
RIDE C   ( 100,X'S) H   (1001,X'S) 
RIDE C   ( 101,X'S) H   (1011,X'S) 
RIDE C   ( 102,X'S) H   (1021,X'S) 
RIDE C   ( 103,X'S) H   (1031,X'S) 
RIDE C   ( 104,X'S) H   (1041,X'S) 
RIDE C   ( 105,X'S) H   (1051,X'S) 
RIDE C   ( 106,X'S) H   (1061,X'S) 
RIDE C   ( 107,X'S) H   (1071,X'S) 
RIDE C   ( 108,X'S) H   (1081,X'S) 
RIDE C   ( 109,X'S) H   (1091,X'S) 
RIDE C   ( 110,X'S) H   (1101,X'S) 
RIDE C   ( 111,X'S) H   (1111,X'S) 
RIDE C   ( 112,X'S) H   (1121,X'S) 
RIDE C   ( 113,X'S) H   (1131,X'S) 
RIDE C   ( 114,X'S) H   (1141,X'S) 
END                                                                             
#
# Punched on 22/02/23 at 13:12:09
#
#LIST     16                                                                    
NO 
REM   HREST   START (DO NOT REMOVE THIS LINE) 
REM   HREST   END (DO NOT REMOVE THIS LINE) 
DISTANCE 1.350000 , 0.0050000 = N(12) TO C(110) 
DISTANCE 1.350000 , 0.0050000 = N(12) TO C(114) 
DISTANCE 1.400000 , 0.0050000 = C(110) TO C(111) 
DISTANCE 1.400000 , 0.0050000 = C(111) TO C(112) 
DISTANCE 1.400000 , 0.0050000 = C(112) TO C(113) 
DISTANCE 1.400000 , 0.0050000 = C(113) TO C(114) 
PLANAR 0.010000  N(12) C(110) C(111) C(112) C(113) C(114) 
ANGLE 120.000000 , 1.000000 = N(12) TO C(110) TO C(111) 
ANGLE 120.000000 , 1.000000 = C(110) TO C(111) TO C(112) 
DISTANCE 1.350000 , 0.0050000 = N(11) TO C(109) 
DISTANCE 1.350000 , 0.0050000 = N(11) TO C(105) 
DISTANCE 1.400000 , 0.0050000 = C(105) TO C(106) 
DISTANCE 1.400000 , 0.0050000 = C(106) TO C(107) 
DISTANCE 1.400000 , 0.0050000 = C(107) TO C(108) 
DISTANCE 1.400000 , 0.0050000 = C(108) TO C(109) 
PLANAR 0.010000  N(11) C(105) C(106) C(107) C(108) C(109) 
VIBRATION 0.0, 0.002000 = C(106) TO C(109) 
VIBRATION 0.0, 0.002000 = C(105) TO C(108) 
DISTANCE 1.350000 , 0.0050000 = N(10) TO C(100) 
DISTANCE 1.350000 , 0.0050000 = N(10) TO C(104) 
DISTANCE 1.400000 , 0.0050000 = C(103) TO C(104) 
DISTANCE 1.400000 , 0.0050000 = C(102) TO C(103) 
DISTANCE 1.400000 , 0.0050000 = C(101) TO C(102) 
DISTANCE 1.400000 , 0.0050000 = C(100) TO C(101) 
PLANAR 0.010000  N(10) C(100) C(101) C(102) C(103) C(104) 
VIBRATION 0.0, 0.002000 = C(101) TO C(104) 
VIBRATION 0.0, 0.002000 = C(100) TO C(103) 
ANGLE 120.000000 , 1.000000 = N(12) TO C(114) TO C(113) 
ANGLE 120.000000 , 1.000000 = C(112) TO C(113) TO C(114) 
ANGLE 120.000000 , 1.000000 = N(11) TO C(109) TO C(108) 
ANGLE 120.000000 , 1.000000 = C(107) TO C(108) TO C(109) 
ANGLE 120.000000 , 1.000000 = C(100) TO C(101) TO C(102) 
ANGLE 120.000000 , 1.000000 = C(101) TO C(102) TO C(103) 
END                                                                             
;

# Manually omitted reflections

loop_
_oxford_refln_omitted_index_h
_oxford_refln_omitted_index_k
_oxford_refln_omitted_index_l
_oxford_refln_omitted_flag
_oxford_refln_omitted_details
   3  -2   3  x   .
# looking for ARCHIVE-HKL.CIF 
 
_iucr_refine_reflections_details 
; 
# An asterisk in column 34 indicates a format overflow 
# Data was input as F-squared 
  -1   0   0    0.00    0.01 
   1   0   0    0.00    0.01 
   1   0   0   -0.02    0.01 
  -3   0   0   25.47    0.65 
  -3   0   0   23.78    0.52 
  -3   0   0   23.77    0.54 
   3   0   0   23.37    0.53 
   3   0   0   26.01    0.67 
   3   0   0   23.44    0.53 
  -4   0   0    6.17    0.29 
  -4   0   0    6.13    0.31 
  -4   0   0    6.40    0.45 
   4   0   0    6.11    0.30 
   4   0   0    6.29    0.49 
   4   0   0    6.31    0.30 
  -5   0   0    1.04    0.18 
  -5   0   0    1.14    0.15 
  -5   0   0    1.34    0.16 
   5   0   0    1.36    0.19 
   5   0   0    1.16    0.16 
   5   0   0    1.21    0.18 
  -6   0   0    5.92    0.37 
  -6   0   0    6.25    0.41 
  -6   0   0    5.73    0.53 
   6   0   0    5.53    0.39 
   6   0   0    6.09    0.61 
   6   0   0    6.14    0.38 
  -7   0   0    0.13    0.19 
  -7   0   0   -0.02    0.22 
  -7   0   0    0.06    0.19 
   7   0   0    0.09    0.22 
   7   0   0   -0.02    0.21 
  -8   0   0   16.73    0.68 
  -8   0   0   17.71    0.89 
   8   0   0   16.97    0.68 
   8   0   0   17.04    0.94 
  -9   0   0   12.46    0.76 
  -9   0   0   12.23    0.58 
   9   0   0   11.86    0.54 
   9   0   0   11.35    0.87 
   9   0   0   12.29    0.91 
 -10   0   0   49.99    1.33 
 -10   0   0   51.71    1.65 
  10   0   0   50.00    1.77 
  10   0   0   50.21    1.72 
  10   0   0   50.99    1.30 
 -11   0   0    4.01    0.44 
 -11   0   0    5.04    0.72 
  11   0   0    5.22    0.87 
  11   0   0    4.87    0.53 
  11   0   0    5.38    0.92 
 -12   0   0   -0.18    0.37 
  12   0   0   -0.10    0.33 
  12   0   0    0.22    0.35 
  12   0   0   -0.36    0.71 
 -13   0   0   -0.32    0.36 
  13   0   0   -0.14    0.38 
  13   0   0   -0.14    0.75 
  13   0   0   -0.11    0.36 
 -14   0   0    4.59    0.56 
  14   0   0    3.38    0.57 
  14   0   0    5.22    1.11 
  14   0   0    4.39    0.52 
 -15   0   0    1.57    0.51 
  15   0   0    2.31    1.05 
  15   0   0    1.34    0.49 
  15   0   0    1.88    0.52 
 -16   0   0    0.52    0.52 
  16   0   0    1.01    1.01 
  16   0   0    0.26    0.52 
  16   0   0    0.84    0.47 
 -17   0   0    9.82    1.02 
  17   0   0    8.78    1.40 
  17   0   0   10.48    0.95 
  17   0   0    9.96    1.47 
 -18   0   0    2.31    0.66 
  18   0   0    2.90    0.60 
  18   0   0    3.13    1.32 
 -19   0   0   -0.01    0.66 
  19   0   0    0.18    1.14 
  19   0   0   -0.70    0.52 
  19   0   0   -0.10    0.51 
  20   0   0   -0.79    0.61 
  19  -1   0    2.04    0.57 
  19  -1   0    1.95    1.36 
 -19   1   0    1.82    0.67 
  18  -1   0    0.21    1.07 
  18  -1   0    0.49    0.53 
  18  -1   0   -0.33    0.53 
 -18   1   0    0.14    0.63 
  17  -1   0    1.62    1.12 
  17  -1   0    1.75    0.52 
 -17   1   0    1.99    0.61 
  16  -1   0   13.71    1.50 
  16  -1   0   12.93    1.55 
  16  -1   0   13.06    0.93 
 -16   1   0   13.47    0.94 
  15  -1   0    5.34    1.18 
  15  -1   0    4.81    0.54 
  15  -1   0    3.36    0.57 
 -15   1   0    4.44    0.60 
  14  -1   0    0.81    0.98 
  14  -1   0   -0.04    0.40 
  14  -1   0    0.00    0.37 
 -14   1   0    0.31    0.43 
  13  -1   0    0.70    0.41 
  13  -1   0    0.37    0.36 
  13  -1   0    0.70    0.79 
 -13   1   0    0.35    0.38 
  12  -1   0   17.64    1.26 
  12  -1   0   17.99    1.39 
  12  -1   0   18.24    1.31 
  12  -1   0   17.12    0.75 
 -12   1   0   16.00    0.77 
  11  -1   0   44.55    1.20 
  11  -1   0   43.29    1.73 
  11  -1   0   44.03    1.73 
  11  -1   0   43.54    1.66 
 -11   1   0   44.25    1.54 
 -11   1   0   44.22    1.25 
  10  -1   0    0.04    0.26 
  10  -1   0    0.04    0.60 
  10  -1   0    0.07    0.30 
 -10   1   0   -0.05    0.24 
 -10   1   0   -0.15    0.28 
   9  -1   0   12.23    0.90 
   9  -1   0   12.60    0.91 
   9  -1   0   12.52    0.55 
  -9   1   0   12.42    0.58 
  -9   1   0   12.63    0.79 
   8  -1   0    3.16    0.28 
   8  -1   0    3.41    0.61 
  -8   1   0    3.08    0.31 
  -8   1   0    3.60    0.50 
   7  -1   0   23.28    1.00 
   7  -1   0   23.98    0.96 
   7  -1   0   23.66    0.66 
  -7   1   0   24.14    0.93 
  -7   1   0   25.18    0.69 
  -7   1   0   23.84    0.70 
   6  -1   0    1.25    0.21 
   6  -1   0    2.23    0.52 
   6  -1   0    1.43    0.24 
   6  -1   0    1.33    0.21 
  -6   1   0    1.25    0.24 
  -6   1   0    1.37    0.21 
  -6   1   0    1.30    0.19 
   5  -1   0  106.78    2.12 
   5  -1   0  103.48    2.39 
   5  -1   0  104.57    2.37 
   5  -1   0  102.60    2.08 
  -5   1   0  104.68    2.12 
  -5   1   0  106.80    2.11 
  -5   1   0  106.06    2.34 
   4  -1   0   14.44    0.38 
   4  -1   0   14.69    0.56 
   4  -1   0   14.30    0.36 
   4  -1   0   15.25    0.57 
  -4   1   0   14.81    0.36 
  -4   1   0   14.33    0.37 
  -4   1   0   14.79    0.49 
   3  -1   0   92.55    1.95 
   3  -1   0   93.71    1.82 
   3  -1   0   95.67    2.01 
   3  -1   0   93.51    2.01 
   3  -1   0   96.46    1.82 
  -3   1   0   91.01    1.92 
  -3   1   0   93.08    1.80 
  -3   1   0   91.85    1.81 
   2  -1   0   58.87    1.06 
   2  -1   0   59.44    1.17 
   2  -1   0   56.03    1.18 
   1  -1   0   -0.02    0.02 
   1  -1   0    0.00    0.01 
   1  -1   0    0.01    0.01 
  -1   1   0    0.00    0.01 
  -1   1   0    0.02    0.01 
  -1   1   0   -0.03    0.01 
  -1  -1   0    0.00    0.02 
  -1  -1   0    0.03    0.01 
  -1  -1   0   -0.01    0.01 
   1   1   0    0.01    0.01 
   1   1   0   -0.02    0.02 
  -3  -1   0   40.09    0.81 
  -3  -1   0   38.48    0.93 
  -3  -1   0   40.06    0.79 
   3   1   0   38.97    0.95 
   3   1   0   40.48    0.81 
   3   1   0   39.84    0.80 
  -4  -1   0   14.66    0.37 
  -4  -1   0   14.53    0.39 
  -4  -1   0   13.99    0.52 
   4   1   0   14.53    0.55 
   4   1   0   14.82    0.39 
   4   1   0   14.38    0.38 
  -5  -1   0   21.04    0.58 
  -5  -1   0   21.04    0.54 
  -5  -1   0   20.75    0.76 
   5   1   0   20.95    0.55 
   5   1   0   20.89    0.81 
   5   1   0   21.02    0.55 
  -6  -1   0  181.26    3.84 
  -6  -1   0  176.57    3.82 
  -6  -1   0  176.64    4.09 
   6   1   0  172.41    4.06 
   6   1   0  173.38    3.75 
   6   1   0  181.53    3.87 
  -7  -1   0   13.51    0.50 
  -7  -1   0   13.43    0.72 
  -7  -1   0   13.20    0.54 
   7   1   0   13.44    0.78 
   7   1   0   12.79    0.50 
  -8  -1   0    4.81    0.49 
  -8  -1   0    4.80    0.59 
   8   1   0    5.08    0.43 
   8   1   0    5.16    0.69 
  -9  -1   0    5.41    0.47 
  -9  -1   0    6.12    0.65 
   9   1   0    5.76    0.73 
   9   1   0    5.58    0.45 
 -10  -1   0    1.99    0.37 
 -10  -1   0    0.92    0.27 
  10   1   0    1.86    0.34 
  10   1   0    1.17    0.34 
 -11  -1   0    2.84    0.41 
  11   1   0    2.15    0.42 
  11   1   0    2.66    0.38 
 -12  -1   0   -0.28    0.34 
  12   1   0   -0.23    0.70 
  12   1   0    0.13    0.35 
  12   1   0   -0.11    0.37 
 -13  -1   0    7.71    0.67 
  13   1   0    8.35    1.08 
  13   1   0    8.24    1.08 
  13   1   0    8.00    0.66 
 -14  -1   0    2.17    0.52 
  14   1   0    2.44    0.48 
  14   1   0    2.01    0.54 
  14   1   0    2.85    1.03 
 -15  -1   0    3.90    0.58 
  15   1   0    2.70    0.54 
  15   1   0    4.40    1.12 
  15   1   0    3.52    0.53 
 -16  -1   0   -0.33    0.48 
  16   1   0    0.15    0.99 
  16   1   0   -0.29    0.45 
  16   1   0    0.15    0.46 
 -17  -1   0    0.37    0.56 
  17   1   0   -0.27    0.53 
  17   1   0    0.41    0.54 
  17   1   0    0.31    1.03 
 -18  -1   0    0.95    0.66 
  18   1   0    1.17    1.12 
  18   1   0    0.96    0.53 
  18   1   0   -0.02    0.53 
 -19  -1   0    2.20    0.70 
  19   1   0    2.16    1.28 
  19   1   0    1.69    0.58 
  20   1   0    0.06    1.20 
  20   1   0   -0.18    0.62 
  19  -2   0    0.59    0.56 
  19  -2   0   -0.30    0.58 
  19  -2   0    1.29    1.22 
 -19   2   0    1.05    0.64 
  18  -2   0    0.72    0.54 
  18  -2   0    1.44    0.50 
  18  -2   0    2.27    1.20 
 -18   2   0    1.82    0.62 
  17  -2   0    6.52    1.39 
  17  -2   0    3.84    0.67 
  17  -2   0    5.47    0.65 
 -17   2   0    5.31    0.71 
  16  -2   0    0.79    1.13 
  16  -2   0    0.14    0.46 
  16  -2   0    0.17    0.46 
 -16   2   0    0.46    0.51 
  15  -2   0    0.34    0.40 
  15  -2   0   -0.19    0.98 
  15  -2   0    0.06    0.48 
 -15   2   0    0.24    0.46 
  14  -2   0    1.10    0.38 
  14  -2   0    0.84    0.46 
  14  -2   0    1.08    0.90 
 -14   2   0    0.95    0.43 
  13  -2   0    3.86    0.96 
  13  -2   0    3.83    0.47 
  13  -2   0    3.05    0.51 
 -13   2   0    3.21    0.46 
  12  -2   0    0.28    0.38 
  12  -2   0    0.44    0.35 
  12  -2   0    0.43    0.39 
  12  -2   0    0.44    0.75 
 -12   2   0    0.26    0.35 
  11  -2   0    0.43    0.34 
  11  -2   0    0.30    0.32 
  11  -2   0    0.26    0.35 
  11  -2   0    0.67    0.72 
 -11   2   0    0.28    0.27 
 -11   2   0    0.40    0.33 
  10  -2   0   17.84    1.12 
  10  -2   0   16.97    1.15 
  10  -2   0   17.70    0.66 
  10  -2   0   17.93    1.12 
 -10   2   0   17.49    0.71 
 -10   2   0   17.33    0.91 
   9  -2   0   54.99    1.25 
   9  -2   0   54.84    1.68 
   9  -2   0   54.51    1.71 
   9  -2   0   53.77    1.72 
  -9   2   0   55.76    1.58 
  -9   2   0   57.24    1.35 
   8  -2   0   12.24    0.84 
   8  -2   0   12.34    0.85 
   8  -2   0   12.29    0.53 
   8  -2   0   12.80    0.88 
  -8   2   0   12.51    0.50 
  -8   2   0   12.57    0.74 
  -8   2   0   11.26    0.52 
   7  -2   0    7.97    0.65 
   7  -2   0    7.91    0.43 
   7  -2   0    7.20    0.65 
   7  -2   0    7.69    0.69 
  -7   2   0    8.02    0.39 
  -7   2   0    8.01    0.43 
  -7   2   0    7.74    0.60 
   6  -2   0    6.94    0.64 
   6  -2   0    6.83    0.61 
   6  -2   0    7.06    0.63 
   6  -2   0    6.90    0.34 
   6  -2   0    6.49    0.37 
  -6   2   0    6.52    0.37 
  -6   2   0    6.77    0.34 
  -6   2   0    6.95    0.54 
   5  -2   0    0.75    0.23 
   5  -2   0    0.75    0.25 
   5  -2   0    1.41    0.22 
   5  -2   0    1.16    0.21 
   5  -2   0    1.14    0.45 
  -5   2   0    0.87    0.21 
  -5   2   0    1.08    0.20 
  -5   2   0    1.50    0.38 
   4  -2   0    3.84    0.47 
   4  -2   0    3.90    0.41 
   4  -2   0    3.88    0.24 
   4  -2   0    3.97    0.43 
   4  -2   0    3.84    0.24 
  -4   2   0    3.90    0.24 
  -4   2   0    3.57    0.39 
  -4   2   0    3.77    0.23 
  -4   2   0    4.07    0.37 
   3  -2   0   23.26    0.75 
   3  -2   0   23.73    0.56 
   3  -2   0   23.36    0.75 
   3  -2   0   23.00    0.55 
  -3   2   0   23.96    0.79 
  -3   2   0   23.48    0.56 
  -3   2   0   23.44    0.74 
  -3   2   0   23.14    0.70 
  -3   2   0   23.71    0.58 
   2  -2   0   43.42    0.79 
   2  -2   0   45.91    0.96 
   2  -2   0   41.72    0.94 
  -2   2   0   43.73    0.80 
  -2   2   0   42.12    0.95 
   0   2   0    0.00    0.01 
  -1  -2   0    0.01    0.02 
   1   2   0    0.00    0.01 
   1   2   0    0.01    0.02 
  -2  -2   0    4.69    0.17 
   2   2   0    5.32    0.19 
   2   2   0    5.74    0.32 
  -3  -2   0   86.02    1.60 
  -3  -2   0   85.15    1.80 
  -3  -2   0   85.38    1.60 
   3   2   0   82.97    1.59 
   3   2   0   87.21    1.62 
   3   2   0   83.28    1.79 
  -4  -2   0    7.01    0.25 
  -4  -2   0    6.75    0.23 
  -4  -2   0    6.59    0.36 
   4   2   0    6.91    0.24 
   4   2   0    6.66    0.24 
   4   2   0    6.70    0.40 
  -5  -2   0    0.21    0.20 
  -5  -2   0    0.33    0.17 
  -5  -2   0    0.23    0.18 
   5   2   0    0.19    0.19 
   5   2   0    0.29    0.20 
   5   2   0    0.25    0.18 
  -6  -2   0   59.97    1.55 
  -6  -2   0   57.26    1.27 
  -6  -2   0   59.71    1.24 
   6   2   0   59.00    1.27 
   6   2   0   60.36    1.60 
   6   2   0   59.35    1.27 
  -7  -2   0   37.91    1.01 
  -7  -2   0   38.20    1.27 
   7   2   0   39.90    1.38 
   7   2   0   37.13    0.98 
   7   2   0   38.23    1.32 
  -8  -2   0   11.68    0.54 
  -8  -2   0   12.04    0.74 
   8   2   0   12.64    0.83 
   8   2   0   11.46    0.52 
  -9  -2   0   35.43    1.00 
  -9  -2   0   36.37    1.33 
   9   2   0   34.58    0.95 
   9   2   0   35.53    1.35 
 -10  -2   0    0.01    0.29 
 -10  -2   0   -0.05    0.24 
  10   2   0    0.01    0.29 
  10   2   0   -0.02    0.28 
 -11  -2   0    0.59    0.34 
  11   2   0    0.71    0.34 
  11   2   0    0.62    0.33 
 -12  -2   0    7.72    0.69 
  12   2   0    7.49    0.61 
  12   2   0    8.06    0.98 
 -13  -2   0    0.18    0.39 
  13   2   0    0.56    0.79 
  13   2   0    0.22    0.40 
  13   2   0    0.14    0.37 
 -14  -2   0   -0.06    0.43 
  14   2   0    0.42    0.89 
  14   2   0   -0.04    0.41 
  14   2   0   -0.21    0.45 
 -15  -2   0    0.70    0.48 
  15   2   0    0.89    0.95 
  15   2   0    0.67    0.47 
  15   2   0    0.60    0.51 
 -16  -2   0   -0.29    0.54 
  16   2   0    0.14    0.94 
  16   2   0   -0.09    0.48 
  16   2   0    0.23    0.47 
 -17  -2   0    0.82    0.55 
  17   2   0    1.46    1.13 
  17   2   0    1.41    0.60 
  17   2   0    0.54    0.53 
 -18  -2   0    0.01    0.57 
  18   2   0   -0.70    0.56 
  18   2   0    0.04    0.53 
  18   2   0   -0.76    1.02 
 -19  -2   0   -0.11    0.67 
  19   2   0    0.04    0.55 
  19   2   0    0.08    1.17 
  20   2   0    0.83    1.25 
  20   2   0    0.90    0.64 
  20   2   0   -0.26    0.62 
  19  -3   0    2.43    1.25 
  19  -3   0    2.12    0.58 
 -19   3   0    2.44    0.73 
  18  -3   0    5.14    1.35 
  18  -3   0    3.86    0.58 
 -18   3   0    4.00    0.68 
  17  -3   0    0.91    1.09 
  17  -3   0    0.41    0.49 
 -17   3   0    0.43    0.59 
  16  -3   0   -0.04    0.50 
  16  -3   0    0.35    0.98 
  16  -3   0    0.28    0.45 
 -16   3   0    0.56    0.52 
  15  -3   0    0.40    0.50 
  15  -3   0    0.86    0.40 
  15  -3   0    0.73    1.07 
 -15   3   0    0.73    0.53 
  14  -3   0    6.68    0.63 
  14  -3   0    6.86    1.20 
  14  -3   0    4.97    0.63 
 -14   3   0    6.34    0.70 
  13  -3   0    0.20    0.33 
  13  -3   0   -0.01    0.40 
  13  -3   0   -0.05    0.79 
 -13   3   0   -0.18    0.40 
  12  -3   0    6.84    0.99 
  12  -3   0    7.23    1.04 
  12  -3   0    7.15    1.14 
  12  -3   0    6.88    0.62 
 -12   3   0    6.88    0.61 
  11  -3   0   41.21    1.69 
  11  -3   0   41.46    1.62 
  11  -3   0   41.41    1.15 
  11  -3   0   40.65    1.71 
 -11   3   0   41.71    1.51 
 -11   3   0   40.76    1.18 
  10  -3   0   29.40    1.35 
  10  -3   0   31.20    1.38 
  10  -3   0   29.68    0.85 
  10  -3   0   30.71    1.30 
 -10   3   0   30.49    1.16 
 -10   3   0   29.51    0.94 
   9  -3   0    8.69    0.87 
   9  -3   0    8.14    0.82 
   9  -3   0    8.40    0.84 
   9  -3   0    8.14    0.43 
  -9   3   0    8.64    0.71 
  -9   3   0    8.07    0.49 
   8  -3   0    8.03    0.76 
   8  -3   0    8.55    0.80 
   8  -3   0    7.67    0.41 
   8  -3   0    7.87    0.74 
  -8   3   0    8.15    0.60 
  -8   3   0    8.00    0.44 
  -8   3   0    7.56    0.44 
   7  -3   0    7.57    0.68 
   7  -3   0    8.15    0.72 
   7  -3   0    7.88    0.44 
   7  -3   0    8.15    0.48 
   7  -3   0    8.40    0.74 
   7  -3   0    7.43    0.41 
  -7   3   0    8.12    0.61 
  -7   3   0    7.57    0.42 
  -7   3   0    7.62    0.41 
   6  -3   0   32.82    1.08 
   6  -3   0   32.98    1.10 
   6  -3   0   33.18    0.78 
   6  -3   0   33.09    0.77 
   6  -3   0   32.34    0.75 
   6  -3   0   32.49    1.14 
  -6   3   0   33.24    0.77 
  -6   3   0   33.09    1.01 
  -6   3   0   32.61    0.80 
   5  -3   0    2.98    0.27 
   5  -3   0    2.96    0.28 
   5  -3   0    3.01    0.58 
   5  -3   0    2.67    0.53 
   5  -3   0    2.85    0.28 
  -5   3   0    3.30    0.63 
  -5   3   0    3.20    0.48 
  -5   3   0    2.53    0.26 
  -5   3   0    2.81    0.49 
  -5   3   0    2.62    0.32 
   4  -3   0   27.13    0.81 
   4  -3   0   28.73    0.55 
   4  -3   0   29.12    0.56 
   4  -3   0   28.05    0.55 
   4  -3   0   26.80    0.84 
  -4   3   0   27.84    0.83 
  -4   3   0   27.56    0.75 
  -4   3   0   26.85    0.84 
  -4   3   0   28.06    0.58 
  -4   3   0   28.30    0.57 
   3  -3   0    8.89    0.24 
   3  -3   0    8.50    0.43 
   3  -3   0    8.29    0.44 
   3  -3   0    9.47    0.25 
  -3   3   0    9.83    0.28 
  -3   3   0    9.53    0.26 
  -3   3   0    8.72    0.52 
  -3   3   0    8.78    0.43 
   2  -3   0   31.99    0.89 
   2  -3   0   32.04    0.92 
  -2   3   0   32.32    0.92 
  -2   3   0   30.98    0.88 
  -2   3   0   32.60    0.69 
  -2   3   0   30.49    0.68 
  -1   3   0   22.34    0.47 
  -1   3   0   21.28    0.56 
  -1   3   0   27.91    0.65 
   0  -3   0   20.79    0.41 
  -1  -3   0   47.68    0.80 
  -1  -3   0   42.15    0.97 
  -1  -3   0   48.83    0.82 
   1   3   0   40.43    0.97 
  -2  -3   0    8.38    0.40 
  -2  -3   0    8.70    0.22 
  -2  -3   0    8.84    0.24 
  -2  -3   0    8.72    0.25 
   2   3   0    7.67    0.24 
   2   3   0    8.37    0.42 
   2   3   0    8.68    0.25 
  -3  -3   0    2.13    0.24 
  -3  -3   0    2.39    0.22 
   3   3   0    2.93    0.40 
   3   3   0    2.19    0.22 
   3   3   0    2.18    0.22 
  -4  -3   0  281.39    7.43 
  -4  -3   0  285.09    7.21 
  -4  -3   0  286.05    7.21 
   4   3   0  278.54    7.38 
   4   3   0  289.68    7.30 
   4   3   0  279.78    7.11 
  -5  -3   0   20.88    0.68 
  -5  -3   0   20.44    0.89 
  -5  -3   0   20.65    0.63 
   5   3   0   20.72    0.65 
   5   3   0   20.17    0.91 
   5   3   0   20.54    0.64 
  -6  -3   0   10.57    0.65 
  -6  -3   0   11.23    0.42 
  -6  -3   0   11.14    0.46 
   6   3   0   10.63    0.45 
   6   3   0   11.45    0.46 
   6   3   0   10.79    0.72 
  -7  -3   0  148.04    3.62 
  -7  -3   0  148.17    3.28 
   7   3   0  147.03    3.24 
   7   3   0  160.67    3.59 
   7   3   0  147.99    3.66 
  -8  -3   0   71.42    1.94 
  -8  -3   0   71.78    1.61 
   8   3   0   71.55    1.59 
   8   3   0   71.57    2.00 
  -9  -3   0   17.61    0.70 
  -9  -3   0   17.76    0.94 
   9   3   0   17.22    0.68 
   9   3   0   17.26    1.07 
 -10  -3   0    0.03    0.29 
 -10  -3   0   -0.06    0.24 
  10   3   0   -0.04    0.29 
  10   3   0    0.08    0.30 
 -11  -3   0    1.60    0.37 
  11   3   0    1.41    0.38 
  11   3   0    1.32    0.36 
 -12  -3   0    4.35    0.47 
  12   3   0    4.24    0.46 
  12   3   0    3.72    0.48 
 -13  -3   0   -0.09    0.39 
  13   3   0    0.09    0.40 
  13   3   0   -0.06    0.37 
 -14  -3   0    0.42    0.46 
  14   3   0    0.65    0.50 
  14   3   0    0.41    0.46 
 -15  -3   0   12.74    0.91 
  15   3   0   13.67    0.90 
  15   3   0   12.33    1.39 
  15   3   0   12.64    1.41 
 -16  -3   0    3.59    0.63 
  16   3   0    2.57    0.60 
  16   3   0    5.03    1.23 
  16   3   0    3.84    0.62 
 -17  -3   0    0.21    0.53 
  17   3   0    0.60    0.53 
  17   3   0    0.05    0.55 
  17   3   0    0.36    1.07 
 -18  -3   0    4.02    0.72 
  18   3   0    4.18    1.32 
  18   3   0    4.01    0.71 
 -19  -3   0    1.74    0.66 
  19   3   0    1.55    0.66 
  19   3   0    0.52    0.62 
  19   3   0    2.77    1.35 
  19  -4   0    0.60    1.15 
 -19   4   0    0.07    0.64 
  18  -4   0    0.57    1.12 
  18  -4   0    0.14    0.47 
 -18   4   0    0.23    0.56 
  17  -4   0    5.13    0.59 
  17  -4   0    6.83    1.39 
 -17   4   0    6.21    0.74 
  16  -4   0    0.81    1.02 
  16  -4   0    0.48    0.45 
 -16   4   0    0.82    0.53 
  15  -4   0   -0.19    0.91 
  15  -4   0    0.09    0.41 
 -15   4   0    0.59    0.53 
  14  -4   0    0.94    0.41 
  14  -4   0    1.06    0.97 
 -14   4   0    0.90    0.45 
  13  -4   0    0.56    0.84 
  13  -4   0    0.46    0.34 
 -13   4   0    0.10    0.37 
  12  -4   0    2.17    0.37 
  12  -4   0    1.49    0.53 
  12  -4   0    2.84    0.88 
 -12   4   0    1.89    0.43 
  11  -4   0    5.05    0.53 
  11  -4   0    4.89    0.91 
 -11   4   0    5.05    0.53 
  10  -4   0   24.19    1.25 
  10  -4   0   25.92    0.78 
  10  -4   0   23.90    1.17 
 -10   4   0   25.27    0.83 
 -10   4   0   25.07    1.05 
   9  -4   0   42.97    1.47 
   9  -4   0   42.54    1.54 
   9  -4   0   43.25    1.04 
  -9   4   0   44.17    1.13 
  -9   4   0   43.78    1.37 
   8  -4   0   11.90    0.49 
   8  -4   0   11.46    0.83 
   8  -4   0   12.27    0.86 
  -8   4   0   12.02    0.48 
  -8   4   0   11.34    0.67 
  -8   4   0   11.67    0.54 
   7  -4   0    5.16    0.35 
   7  -4   0    4.53    0.68 
   7  -4   0    4.40    0.63 
   7  -4   0    5.06    0.35 
  -7   4   0    4.76    0.41 
  -7   4   0    4.58    0.55 
  -7   4   0    4.94    0.37 
   6  -4   0    2.83    0.28 
   6  -4   0    2.66    0.27 
   6  -4   0    2.09    0.31 
   6  -4   0    3.22    0.56 
  -6   4   0    2.83    0.24 
  -6   4   0    2.88    0.52 
  -6   4   0    2.81    0.29 
  -6   4   0    1.99    0.30 
   5  -4   0    4.49    0.24 
   5  -4   0    4.86    0.51 
   5  -4   0    4.40    0.24 
   5  -4   0    4.21    0.49 
  -5   4   0    5.34    0.60 
  -5   4   0    4.82    0.51 
  -5   4   0    4.36    0.29 
  -5   4   0    4.29    0.29 
  -5   4   0    5.02    0.49 
   4  -4   0   57.13    1.39 
   4  -4   0   55.84    1.36 
   4  -4   0   57.04    1.02 
   4  -4   0   58.07    1.03 
  -4   4   0   57.16    1.30 
  -4   4   0   56.57    1.04 
  -4   4   0   57.42    1.34 
  -4   4   0   57.01    1.42 
  -4   4   0   56.44    1.06 
   3  -4   0  219.29    5.01 
   3  -4   0  219.10    5.29 
   3  -4   0  226.49    5.43 
  -3   4   0  223.10    5.39 
  -3   4   0  217.00    4.99 
  -3   4   0  218.21    5.04 
  -3   4   0  223.07    5.34 
   2  -4   0   42.94    1.06 
   2  -4   0   44.00    1.10 
  -2   4   0   43.62    1.06 
  -2   4   0   43.90    1.12 
  -2   4   0   42.64    0.77 
  -2   4   0   42.86    0.89 
  -2   4   0   43.01    0.78 
   1  -4   0  112.86    2.27 
   1  -4   0  114.05    2.45 
  -1   4   0  115.92    2.45 
  -1   4   0  114.68    2.28 
   0  -4   0   19.01    0.31 
   0   4   0   18.72    0.44 
   0   4   0   19.16    0.30 
  -1  -4   0   28.79    0.78 
  -1  -4   0   28.47    0.55 
   1   4   0   28.87    0.55 
   1   4   0   28.33    0.55 
   1   4   0   28.68    0.55 
   1   4   0   28.47    0.77 
  -2  -4   0   22.96    0.52 
  -2  -4   0   22.84    0.50 
  -2  -4   0   22.86    0.52 
  -2  -4   0   23.50    0.76 
   2   4   0   22.86    0.54 
   2   4   0   23.24    0.54 
   2   4   0   23.26    0.50 
   2   4   0   24.21    0.79 
  -3  -4   0  963.19   44.22 
  -3  -4   0  964.52   42.71 
  -3  -4   0  995.20   44.68 
  -3  -4   0  975.97   43.68 
   3   4   0 1000.00   45.16 
   3   4   0  970.79   43.38 
   3   4   0  973.12   45.23 
  -4  -4   0   29.53    0.64 
  -4  -4   0   29.43    0.61 
  -4  -4   0   29.96    0.89 
   4   4   0   29.65    0.63 
   4   4   0   29.46    0.90 
   4   4   0   28.66    0.61 
  -5  -4   0    9.67    0.46 
  -5  -4   0    9.36    0.43 
  -5  -4   0    9.36    0.70 
   5   4   0    9.63    0.46 
   5   4   0    9.33    0.46 
   5   4   0    9.11    0.72 
  -6  -4   0   29.43    1.04 
  -6  -4   0   27.15    0.73 
  -6  -4   0   27.65    0.71 
   6   4   0   27.97    0.74 
   6   4   0   28.36    0.74 
   6   4   0   29.38    1.08 
  -7  -4   0   22.38    0.79 
  -7  -4   0   24.10    1.11 
   7   4   0   22.44    0.79 
   7   4   0   23.62    1.14 
   7   4   0   24.74    0.93 
  -8  -4   0    7.01    0.46 
  -8  -4   0    7.31    0.66 
   8   4   0    6.99    0.46 
   8   4   0    8.16    0.76 
  -9  -4   0    1.43    0.28 
  -9  -4   0    1.59    0.32 
   9   4   0    1.44    0.31 
   9   4   0    1.46    0.31 
 -10  -4   0    6.89    0.60 
  10   4   0    6.65    0.53 
  10   4   0    7.37    0.88 
 -11  -4   0    4.64    0.45 
  11   4   0    3.78    0.45 
  11   4   0    4.32    0.43 
 -12  -4   0    9.46    0.68 
  12   4   0   11.42    1.21 
  12   4   0    9.63    0.68 
 -13  -4   0    3.78    0.54 
  13   4   0    3.27    0.50 
  13   4   0    2.61    0.50 
 -14  -4   0    2.87    0.54 
  14   4   0    2.20    0.52 
  14   4   0    3.03    0.53 
 -15  -4   0    0.45    0.50 
  15   4   0    0.10    0.46 
  15   4   0   -0.01    0.45 
 -16  -4   0    5.95    0.73 
  16   4   0    5.61    0.69 
  16   4   0    4.39    0.69 
  16   4   0    6.16    1.26 
 -17  -4   0    1.62    0.58 
  17   4   0    0.75    0.62 
  17   4   0    1.53    1.11 
  17   4   0    1.63    0.57 
 -18  -4   0    2.00    0.63 
  18   4   0    1.72    0.61 
  18   4   0    1.00    0.59 
  18   4   0    1.94    1.20 
 -19  -4   0    2.57    0.71 
  19   4   0    2.06    0.64 
  19   4   0    2.25    1.30 
  19  -5   0   -0.09    1.20 
 -19   5   0    0.18    0.59 
  18  -5   0    1.32    1.13 
 -18   5   0    0.57    0.57 
  17  -5   0    0.28    0.44 
  17  -5   0    0.14    1.02 
 -17   5   0    0.38    0.57 
  16  -5   0   -0.02    0.41 
  16  -5   0   -0.37    0.92 
 -16   5   0   -0.05    0.48 
  15  -5   0    2.72    1.12 
  15  -5   0    2.14    0.48 
 -15   5   0    2.02    0.56 
  14  -5   0    2.65    0.44 
  14  -5   0    2.54    1.14 
 -14   5   0    2.29    0.49 
  13  -5   0    8.07    0.64 
  13  -5   0    7.09    1.13 
 -13   5   0    7.71    0.66 
  12  -5   0    1.57    0.81 
  12  -5   0    1.47    0.34 
 -12   5   0    1.30    0.41 
  11  -5   0   26.68    1.33 
  11  -5   0   27.60    0.85 
  11  -5   0   27.52    1.51 
 -11   5   0   27.00    1.20 
 -11   5   0   27.21    0.92 
  10  -5   0    8.66    0.51 
  10  -5   0    8.27    0.93 
  10  -5   0    8.58    0.87 
 -10   5   0    8.47    0.76 
 -10   5   0    8.49    0.53 
   9  -5   0    0.04    0.54 
   9  -5   0    0.32    0.21 
   9  -5   0    0.37    0.29 
  -9   5   0    0.26    0.26 
  -9   5   0    0.30    0.22 
  -9   5   0    0.48    0.24 
   8  -5   0   23.05    1.07 
   8  -5   0   23.40    1.04 
   8  -5   0   23.71    0.65 
  -8   5   0   24.29    0.74 
  -8   5   0   25.59    0.71 
  -8   5   0   22.97    0.93 
   7  -5   0   12.26    0.77 
   7  -5   0   13.46    0.84 
   7  -5   0   13.08    0.45 
   7  -5   0   12.70    0.43 
  -7   5   0   11.89    0.46 
  -7   5   0   13.25    0.71 
  -7   5   0   13.04    0.82 
  -7   5   0   13.31    0.77 
  -7   5   0   12.73    0.47 
   6  -5   0    2.20    0.19 
   6  -5   0    2.50    0.50 
   6  -5   0    2.17    0.18 
   6  -5   0    2.20    0.32 
  -6   5   0    1.94    0.23 
  -6   5   0    2.06    0.21 
  -6   5   0    3.06    0.51 
  -6   5   0    2.17    0.24 
  -6   5   0    2.02    0.32 
   5  -5   0  146.66    3.51 
   5  -5   0  142.40    3.44 
   5  -5   0  143.49    3.00 
   5  -5   0  145.89    3.03 
  -5   5   0  140.80    3.05 
  -5   5   0  145.51    3.07 
  -5   5   0  146.64    3.47 
  -5   5   0  145.98    3.36 
  -5   5   0  144.70    3.51 
   4  -5   0   54.59    0.91 
   4  -5   0   52.73    1.33 
   4  -5   0   51.59    1.28 
  -4   5   0   52.26    1.38 
  -4   5   0   54.63    1.00 
  -4   5   0   53.89    1.32 
  -4   5   0   54.81    0.99 
   3  -5   0    4.48    0.49 
   3  -5   0    4.58    0.52 
  -3   5   0    5.09    0.33 
  -3   5   0    4.79    0.23 
  -3   5   0    4.97    0.51 
  -3   5   0    4.97    0.58 
  -3   5   0    5.02    0.23 
   2  -5   0  225.42    5.42 
  -2   5   0  231.41    5.57 
  -2   5   0  231.11    5.48 
  -2   5   0  230.56    5.28 
   1  -5   0    0.10    0.25 
   1  -5   0    0.30    0.13 
  -1   5   0    0.13    0.13 
   0  -5   0    1.72    0.19 
   0   5   0    2.19    0.36 
   0   5   0    2.00    0.19 
   0   5   0    1.78    0.34 
  -1  -5   0   51.41    1.06 
   1   5   0   52.11    1.05 
   1   5   0   52.33    1.02 
   1   5   0   52.32    1.02 
   1   5   0   52.69    1.35 
  -2  -5   0  376.32   10.61 
  -2  -5   0  391.89   10.88 
  -2  -5   0  384.16   11.03 
   2   5   0  385.95   10.85 
   2   5   0  382.05   10.80 
   2   5   0  379.55   10.65 
   2   5   0  390.46   10.98 
  -3  -5   0  140.88    3.11 
  -3  -5   0  140.67    3.47 
  -3  -5   0  139.43    3.08 
  -3  -5   0  138.77    3.04 
   3   5   0  143.77    3.52 
   3   5   0  139.32    3.11 
   3   5   0  139.92    3.12 
  -4  -5   0   15.88    0.42 
  -4  -5   0   16.56    0.39 
  -4  -5   0   15.98    0.46 
  -4  -5   0   16.87    0.74 
   4   5   0   16.34    0.48 
   4   5   0   15.96    0.48 
   4   5   0   16.64    0.75 
  -5  -5   0   17.37    0.52 
  -5  -5   0   17.60    0.57 
  -5  -5   0   17.28    0.47 
  -5  -5   0   17.69    0.83 
   5   5   0   17.47    0.86 
   5   5   0   16.86    0.55 
   5   5   0   17.42    0.55 
  -6  -5   0    0.38    0.24 
  -6  -5   0    0.22    0.22 
   6   5   0    0.38    0.24 
   6   5   0    0.32    0.23 
   6   5   0    0.29    0.24 
  -7  -5   0   22.59    1.00 
  -7  -5   0   21.85    0.69 
   7   5   0   21.98    0.73 
   7   5   0   23.23    0.84 
   7   5   0   21.84    1.02 
  -8  -5   0    4.48    0.43 
  -8  -5   0    4.28    0.64 
   8   5   0    4.13    0.43 
   8   5   0    4.57    0.72 
  -9  -5   0   38.13    1.06 
  -9  -5   0   37.68    1.43 
   9   5   0   37.29    1.05 
   9   5   0   37.94    1.49 
 -10  -5   0    1.84    0.40 
  10   5   0    1.57    0.38 
  10   5   0    2.15    0.38 
 -11  -5   0    3.05    0.42 
  11   5   0    3.20    0.43 
  11   5   0    2.45    0.43 
 -12  -5   0    3.17    0.47 
  12   5   0    2.41    0.46 
  12   5   0    3.16    0.46 
 -13  -5   0    3.22    0.53 
  13   5   0    2.91    0.51 
  13   5   0    2.59    0.53 
 -14  -5   0    5.99    0.68 
  14   5   0    6.30    0.74 
 -15  -5   0    5.06    0.69 
  15   5   0    3.56    0.62 
  15   5   0    4.78    0.62 
 -16  -5   0    1.31    0.61 
  16   5   0    1.85    0.57 
  16   5   0    0.98    0.53 
 -17  -5   0    0.75    0.55 
  17   5   0    0.93    1.07 
  17   5   0    0.57    0.53 
  17   5   0   -0.18    0.56 
 -18  -5   0    2.32    0.66 
  18   5   0    2.71    1.27 
  18   5   0    1.98    0.63 
  18   5   0    1.02    0.68 
 -19  -5   0    0.94    0.64 
  19   5   0    0.96    0.70 
  19   5   0    0.23    0.67 
  19   5   0    0.69    1.27 
  18  -6   0    2.37    1.23 
 -18   6   0    2.04    0.68 
  17  -6   0    0.04    1.01 
 -17   6   0   -0.04    0.50 
  16  -6   0    2.30    1.18 
  16  -6   0    2.03    0.46 
 -16   6   0    2.30    0.60 
  15  -6   0    0.60    0.39 
  15  -6   0    0.59    0.95 
 -15   6   0    0.95    0.51 
  14  -6   0    3.77    1.12 
  14  -6   0    3.47    0.47 
 -14   6   0    3.47    0.53 
  13  -6   0    0.29    0.33 
  13  -6   0   -0.43    0.80 
 -13   6   0    0.29    0.43 
  12  -6   0    1.90    0.35 
  12  -6   0    1.82    0.84 
 -12   6   0    1.69    0.40 
  11  -6   0   16.88    1.20 
  11  -6   0   17.07    1.19 
  11  -6   0   17.78    0.69 
 -11   6   0   16.48    0.72 
 -11   6   0   16.55    0.98 
  10  -6   0    2.32    0.43 
  10  -6   0    2.89    0.31 
  10  -6   0    2.77    0.80 
 -10   6   0    2.02    0.30 
 -10   6   0    2.71    0.37 
   9  -6   0    9.06    0.85 
   9  -6   0    9.51    0.82 
   9  -6   0    8.82    0.45 
  -9   6   0    8.87    0.72 
  -9   6   0    8.91    0.53 
  -9   6   0    9.08    0.48 
   8  -6   0   13.04    0.83 
   8  -6   0   13.42    0.90 
   8  -6   0   13.19    0.45 
  -8   6   0   13.51    0.89 
  -8   6   0   12.86    0.53 
  -8   6   0   13.09    0.73 
  -8   6   0   13.24    0.50 
  -8   6   0   13.69    0.82 
   7  -6   0    0.99    0.17 
   7  -6   0    0.77    0.27 
   7  -6   0    0.92    0.45 
   7  -6   0    1.12    0.16 
  -7   6   0    1.08    0.45 
  -7   6   0    0.84    0.22 
  -7   6   0    0.84    0.32 
  -7   6   0    0.95    0.20 
  -7   6   0    0.97    0.22 
   6  -6   0   12.76    0.34 
   6  -6   0   12.92    0.35 
   6  -6   0   12.07    0.71 
   6  -6   0   12.05    0.74 
  -6   6   0   12.67    0.43 
  -6   6   0   12.68    0.74 
  -6   6   0   11.97    0.77 
  -6   6   0   12.97    0.42 
  -6   6   0   12.67    0.66 
   5  -6   0    2.10    0.14 
   5  -6   0    1.83    0.13 
   5  -6   0    2.81    0.53 
   5  -6   0    2.62    0.50 
  -5   6   0    2.56    0.48 
  -5   6   0    1.98    0.34 
  -5   6   0    2.17    0.27 
  -5   6   0    2.08    0.27 
  -5   6   0    2.14    0.25 
   4  -6   0    4.32    0.52 
   4  -6   0    3.94    0.48 
  -4   6   0    4.64    0.63 
  -4   6   0    4.06    0.46 
  -4   6   0    4.24    0.24 
  -4   6   0    4.01    0.24 
  -4   6   0    3.81    0.32 
   3  -6   0    7.91    0.53 
  -3   6   0    8.47    0.23 
  -3   6   0    7.87    0.49 
  -3   6   0    8.39    0.35 
  -3   6   0    8.37    0.23 
  -3   6   0    8.10    0.63 
   2  -6   0    0.31    0.34 
  -2   6   0    0.15    0.34 
  -2   6   0    0.25    0.24 
  -2   6   0    0.44    0.17 
   1  -6   0    1.26    0.38 
   1  -6   0    1.18    0.18 
  -1   6   0    1.03    0.33 
  -1   6   0    1.16    0.18 
   0  -6   0   14.73    0.43 
   0   6   0   14.47    0.64 
   0   6   0   15.17    0.42 
   0   6   0   14.69    0.63 
  -1  -6   0   47.27    0.98 
   1   6   0   47.23    1.29 
   1   6   0   47.79    0.93 
   1   6   0   47.26    0.93 
   1   6   0   47.81    0.98 
  -2  -6   0  121.77    2.26 
  -2  -6   0  118.31    2.29 
  -2  -6   0  118.38    2.67 
   2   6   0  118.70    2.28 
   2   6   0  119.63    2.69 
   2   6   0  119.87    2.31 
   2   6   0  119.55    2.31 
  -3  -6   0    4.69    0.24 
  -3  -6   0    4.61    0.24 
  -3  -6   0    4.61    0.25 
  -3  -6   0    5.04    0.55 
   3   6   0    4.50    0.30 
   3   6   0    4.78    0.56 
   3   6   0    4.81    0.29 
   3   6   0    4.65    0.23 
  -4  -6   0   29.68    1.09 
  -4  -6   0   29.44    0.74 
  -4  -6   0   28.98    0.66 
  -4  -6   0   29.72    0.72 
   4   6   0   29.31    0.75 
   4   6   0   28.52    1.08 
   4   6   0   29.03    0.75 
  -5  -6   0    0.02    0.15 
  -5  -6   0    0.09    0.19 
  -5  -6   0   -0.03    0.19 
  -5  -6   0    0.17    0.14 
   5   6   0    0.17    0.23 
   5   6   0    0.03    0.21 
   5   6   0   -0.06    0.19 
  -6  -6   0    0.09    0.21 
  -6  -6   0    0.09    0.16 
  -6  -6   0   -0.14    0.19 
   6   6   0    0.04    0.22 
   6   6   0    0.08    0.24 
   6   6   0   -0.11    0.19 
  -7  -6   0    3.00    0.37 
  -7  -6   0    2.77    0.63 
   7   6   0    3.11    0.44 
   7   6   0    3.00    0.68 
   7   6   0    3.25    0.38 
  -8  -6   0    0.30    0.24 
  -8  -6   0    0.20    0.27 
   8   6   0    0.41    0.27 
   8   6   0    0.32    0.25 
  -9  -6   0    5.35    0.50 
   9   6   0    6.32    0.88 
   9   6   0    5.45    0.57 
 -10  -6   0   18.61    0.82 
  10   6   0   18.22    0.77 
  10   6   0   18.73    1.19 
 -11  -6   0    6.24    0.57 
  11   6   0    6.39    0.53 
  11   6   0    6.92    0.97 
 -12  -6   0    4.25    0.53 
  12   6   0    3.60    0.52 
  12   6   0    4.09    0.49 
 -13  -6   0   16.53    0.89 
  13   6   0   16.69    1.50 
  13   6   0   17.02    0.91 
 -14  -6   0    2.81    0.55 
  14   6   0    2.53    0.53 
  14   6   0    1.95    0.54 
 -15  -6   0    0.39    0.50 
  15   6   0   -0.02    0.47 
  15   6   0   -0.03    0.49 
 -16  -6   0    1.68    0.55 
  16   6   0    2.04    0.57 
  16   6   0    1.37    0.58 
 -17  -6   0   -0.04    0.53 
  17   6   0   -0.08    0.52 
  17   6   0   -0.30    0.53 
 -18  -6   0   -0.01    0.58 
  18   6   0   -0.43    0.62 
  18   6   0   -0.54    0.56 
  18   6   0    0.11    1.03 
 -19  -6   0    0.49    0.62 
  19   6   0    0.24    0.60 
  19   6   0   -0.36    0.60 
  19   6   0    1.00    1.23 
  18  -7   0    0.62    1.19 
 -18   7   0    0.06    0.55 
  17  -7   0    0.54    1.00 
 -17   7   0    0.22    0.56 
  16  -7   0    1.91    1.05 
 -16   7   0    1.67    0.57 
  15  -7   0   -0.35    0.98 
  15  -7   0   -0.15    0.37 
 -15   7   0    0.16    0.44 
  14  -7   0    0.12    0.94 
  14  -7   0    0.21    0.35 
 -14   7   0    0.34    0.47 
  13  -7   0    1.30    0.37 
  13  -7   0    1.65    0.92 
 -13   7   0    1.57    0.44 
  12  -7   0   -0.70    0.70 
  12  -7   0   -0.08    0.27 
 -12   7   0   -0.16    0.35 
  11  -7   0    2.27    0.48 
  11  -7   0    2.42    0.32 
  11  -7   0    2.79    0.83 
 -11   7   0    2.36    0.41 
 -11   7   0    1.97    0.34 
  10  -7   0    9.65    0.47 
  10  -7   0    9.51    0.94 
  10  -7   0    9.47    0.91 
 -10   7   0    9.87    0.81 
 -10   7   0    9.86    0.60 
   9  -7   0    1.25    0.35 
   9  -7   0    1.48    0.23 
   9  -7   0    1.24    0.62 
  -9   7   0    1.15    0.29 
  -9   7   0    1.07    0.26 
  -9   7   0    1.52    0.27 
   8  -7   0    2.02    0.27 
   8  -7   0    1.66    0.38 
   8  -7   0    2.29    0.27 
   8  -7   0    2.44    0.65 
  -8   7   0    2.95    0.82 
  -8   7   0    2.19    0.28 
  -8   7   0    2.21    0.30 
  -8   7   0    1.50    0.37 
   7  -7   0    2.53    0.54 
   7  -7   0    2.26    0.31 
   7  -7   0    2.63    0.21 
  -7   7   0    2.16    0.26 
  -7   7   0    2.53    0.25 
  -7   7   0    2.20    0.37 
  -7   7   0    2.72    0.24 
  -7   7   0    3.21    0.58 
   6  -7   0   13.77    0.27 
   6  -7   0   14.45    0.27 
   6  -7   0   14.11    0.75 
   6  -7   0   15.06    0.83 
  -6   7   0   14.31    0.44 
  -6   7   0   14.72    0.79 
  -6   7   0   14.02    0.46 
  -6   7   0   14.73    0.90 
  -6   7   0   14.68    0.74 
   5  -7   0   15.20    0.80 
   5  -7   0   16.11    0.83 
  -5   7   0   15.75    0.57 
  -5   7   0   16.01    0.91 
  -5   7   0   15.40    0.44 
  -5   7   0   14.89    0.45 
  -5   7   0   15.80    0.80 
   4  -7   0   34.82    1.13 
  -4   7   0   35.85    1.12 
  -4   7   0   34.87    0.74 
  -4   7   0   34.89    0.73 
  -4   7   0   36.74    1.24 
  -4   7   0   35.55    0.88 
   3  -7   0   64.08    1.63 
  -3   7   0   65.92    1.72 
  -3   7   0   64.73    1.37 
  -3   7   0   64.52    1.20 
  -3   7   0   65.49    1.21 
  -3   7   0   65.07    1.61 
   2  -7   0   64.99    1.60 
  -2   7   0   65.98    1.59 
  -2   7   0   65.96    1.72 
  -2   7   0   65.31    1.33 
   1  -7   0    0.83    0.19 
   1  -7   0    0.93    0.38 
  -1   7   0    0.58    0.36 
  -1   7   0    0.73    0.17 
   0  -7   0    3.10    0.25 
   0   7   0    3.36    0.49 
   0   7   0    3.07    0.41 
   0   7   0    3.11    0.24 
  -1  -7   0    0.26    0.14 
   1   7   0    0.23    0.34 
   1   7   0    0.23    0.19 
   1   7   0    0.36    0.14 
   1   7   0    0.36    0.09 
   1   7   0    0.28    0.10 
  -2  -7   0   47.66    0.96 
  -2  -7   0   49.02    1.39 
   2   7   0   48.19    1.37 
   2   7   0   48.00    0.97 
   2   7   0   47.42    0.97 
   2   7   0   47.94    0.96 
  -3  -7   0    6.33    0.24 
  -3  -7   0    6.41    0.25 
  -3  -7   0    6.04    0.25 
  -3  -7   0    5.71    0.57 
   3   7   0    6.30    0.31 
   3   7   0    6.24    0.32 
   3   7   0    6.02    0.25 
   3   7   0    6.02    0.59 
  -4  -7   0    0.10    0.19 
  -4  -7   0    0.13    0.13 
  -4  -7   0    0.07    0.14 
  -4  -7   0    0.02    0.15 
   4   7   0    0.01    0.18 
   4   7   0    0.06    0.16 
   4   7   0    0.12    0.22 
  -5  -7   0    3.46    0.31 
  -5  -7   0    3.71    0.25 
  -5  -7   0    3.42    0.55 
  -5  -7   0    3.61    0.28 
   5   7   0    3.49    0.34 
   5   7   0    3.39    0.35 
  -6  -7   0    2.42    0.32 
  -6  -7   0    3.09    0.35 
  -6  -7   0    3.25    0.28 
   6   7   0    2.18    0.32 
   6   7   0    2.74    0.29 
   6   7   0    2.67    0.27 
  -7  -7   0   83.77    1.89 
  -7  -7   0   84.02    2.42 
  -7  -7   0   84.01    1.80 
   7   7   0   86.57    1.99 
   7   7   0   82.74    1.91 
   7   7   0   85.43    2.46 
  -8  -7   0    9.37    0.81 
  -8  -7   0    8.66    0.53 
  -8  -7   0    9.17    0.43 
   8   7   0    9.10    0.53 
   8   7   0    9.37    0.86 
  -9  -7   0   29.73    0.90 
   9   7   0   28.31    0.90 
   9   7   0   29.41    1.35 
 -10  -7   0   32.18    1.00 
  10   7   0   33.81    1.54 
  10   7   0   32.23    1.02 
 -11  -7   0    0.25    0.35 
  11   7   0    0.19    0.36 
  11   7   0    0.30    0.37 
 -12  -7   0    0.64    0.44 
  12   7   0    0.89    0.42 
  12   7   0    0.29    0.38 
 -13  -7   0    0.26    0.43 
  13   7   0    0.37    0.45 
  13   7   0    0.33    0.49 
 -14  -7   0    0.27    0.44 
  14   7   0    0.31    0.49 
  14   7   0    0.21    0.45 
 -15  -7   0    0.22    0.53 
  15   7   0    0.55    0.49 
  15   7   0   -0.01    0.48 
 -16  -7   0   -0.23    0.54 
  16   7   0   -0.05    0.50 
  16   7   0   -0.19    0.53 
 -17  -7   0    0.71    0.55 
  17   7   0    0.95    0.63 
  17   7   0    0.44    0.58 
 -18  -7   0   -0.23    0.62 
  18   7   0   -0.69    0.55 
  18   7   0   -0.13    0.63 
 -19  -7   0    1.17    0.70 
  19   7   0    0.10    0.65 
  19   7   0    1.50    1.31 
  19   7   0    0.54    0.63 
  18  -8   0    3.21    1.33 
 -18   8   0    2.39    0.69 
  17  -8   0    0.38    0.97 
 -17   8   0   -0.48    0.48 
  16  -8   0    3.50    1.15 
 -16   8   0    3.43    0.62 
  15  -8   0    3.46    1.15 
 -15   8   0    2.77    0.56 
  14  -8   0    6.61    0.77 
  14  -8   0    7.34    1.19 
 -14   8   0    8.07    0.71 
  13  -8   0   11.08    0.63 
  13  -8   0   11.33    1.35 
 -13   8   0   12.44    0.81 
  12  -8   0    1.03    0.30 
  12  -8   0    1.11    0.90 
 -12   8   0    1.33    0.41 
  11  -8   0    0.20    0.41 
  11  -8   0    0.13    0.24 
  11  -8   0    0.13    0.75 
 -11   8   0    0.19    0.33 
 -11   8   0   -0.01    0.27 
  10  -8   0   -0.39    0.58 
  10  -8   0   -0.26    0.19 
  10  -8   0   -0.08    0.35 
 -10   8   0    0.05    0.29 
 -10   8   0   -0.18    0.24 
 -10   8   0   -0.06    0.30 
   9  -8   0    0.18    0.55 
   9  -8   0    0.47    0.16 
   9  -8   0    0.18    0.34 
  -9   8   0    0.27    0.40 
  -9   8   0    0.21    0.24 
  -9   8   0    0.60    0.24 
  -9   8   0    0.14    0.25 
   8  -8   0   12.18    0.93 
   8  -8   0   12.02    0.91 
   8  -8   0   12.21    0.33 
  -8   8   0   12.56    0.49 
  -8   8   0   12.76    0.53 
  -8   8   0   12.17    1.03 
  -8   8   0   11.83    0.76 
   7  -8   0    3.48    0.64 
   7  -8   0    3.49    0.59 
  -7   8   0    3.47    0.59 
  -7   8   0    3.33    0.35 
  -7   8   0    2.69    0.42 
  -7   8   0    2.60    0.30 
  -7   8   0    3.75    0.33 
   6  -8   0    2.37    0.32 
   6  -8   0    3.02    0.53 
  -6   8   0    2.74    0.23 
  -6   8   0    2.35    0.36 
  -6   8   0    2.82    0.28 
  -6   8   0    3.75    0.62 
   5  -8   0    6.03    0.61 
  -5   8   0    6.19    0.29 
  -5   8   0    6.39    0.30 
  -5   8   0    6.21    0.60 
  -5   8   0    6.22    0.72 
   4  -8   0    2.78    0.47 
  -4   8   0    2.56    0.25 
  -4   8   0    2.63    0.19 
  -4   8   0    2.59    0.19 
  -4   8   0    2.22    0.33 
  -4   8   0    2.78    0.44 
   3  -8   0    7.77    0.63 
  -3   8   0    7.65    0.72 
  -3   8   0    7.51    0.22 
  -3   8   0    7.88    0.61 
  -3   8   0    7.43    0.42 
  -3   8   0    7.49    0.22 
   2  -8   0   53.84    1.42 
  -2   8   0   54.99    1.17 
  -2   8   0   53.60    1.55 
  -2   8   0   55.50    1.44 
  -1   8   0   36.15    1.01 
  -1   8   0   36.05    0.74 
   0  -8   0    0.23    0.16 
   0   8   0    0.17    0.34 
   0   8   0    0.26    0.19 
   0   8   0    0.41    0.15 
  -1  -8   0   30.30    0.66 
   1   8   0   30.15    1.02 
   1   8   0   29.79    0.96 
   1   8   0   29.77    0.65 
   1   8   0   29.88    0.58 
   1   8   0   29.75    0.58 
  -2  -8   0    2.15    0.16 
   2   8   0    2.22    0.15 
   2   8   0    2.20    0.16 
   2   8   0    1.76    0.24 
   2   8   0    1.99    0.15 
  -3  -8   0    0.23    0.10 
  -3  -8   0    0.08    0.21 
  -3  -8   0    0.22    0.14 
   3   8   0    0.05    0.16 
   3   8   0    0.15    0.22 
   3   8   0    0.27    0.15 
   3   8   0    0.27    0.14 
  -4  -8   0    6.93    0.30 
  -4  -8   0    7.40    0.67 
  -4  -8   0    7.23    0.31 
  -4  -8   0    7.03    0.32 
   4   8   0    7.06    0.37 
   4   8   0    7.11    0.40 
   4   8   0    7.79    0.70 
  -5  -8   0   37.48    1.30 
  -5  -8   0   38.76    0.85 
  -5  -8   0   37.76    0.79 
  -5  -8   0   37.46    0.84 
   5   8   0   38.39    0.91 
   5   8   0   37.15    0.90 
   5   8   0   38.10    1.35 
  -6  -8   0   76.59    2.20 
  -6  -8   0   75.79    1.57 
  -6  -8   0   76.00    1.66 
   6   8   0   75.69    1.71 
   6   8   0   77.49    1.74 
   6   8   0   77.50    2.24 
  -7  -8   0   13.76    0.59 
  -7  -8   0   13.75    0.50 
  -7  -8   0   13.96    0.96 
   7   8   0   13.79    0.64 
   7   8   0   13.99    0.99 
   7   8   0   14.59    0.71 
  -8  -8   0   17.33    0.65 
  -8  -8   0   17.17    0.53 
   8   8   0   17.68    1.07 
   8   8   0   17.48    0.67 
  -9  -8   0    0.98    0.34 
  -9  -8   0    0.95    0.25 
   9   8   0    1.16    0.39 
   9   8   0    0.75    0.33 
 -10  -8   0   36.03    0.96 
 -10  -8   0   37.13    1.14 
  10   8   0   37.35    1.18 
  10   8   0   39.09    1.70 
 -11  -8   0   33.82    0.91 
 -11  -8   0   33.43    1.09 
  11   8   0   34.31    1.09 
  11   8   0   34.02    1.62 
 -12  -8   0    0.46    0.43 
  12   8   0    0.68    0.45 
  12   8   0    0.74    0.43 
 -13  -8   0    2.79    0.50 
  13   8   0    1.83    0.51 
  13   8   0    2.70    0.55 
 -14  -8   0    0.21    0.50 
  14   8   0    0.03    0.51 
  14   8   0    0.07    0.45 
 -15  -8   0    6.91    0.79 
  15   8   0    6.75    0.82 
 -16  -8   0    3.17    0.61 
  16   8   0    2.03    0.62 
  16   8   0    3.04    0.61 
 -17  -8   0    0.28    0.54 
  17   8   0    0.56    0.63 
  17   8   0   -0.30    0.57 
 -18  -8   0    0.91    0.58 
  18   8   0    0.04    0.63 
  18   8   0    0.68    0.68 
  19   8   0    1.16    1.22 
  19   8   0   -0.14    0.65 
  19   8   0    0.92    0.73 
  17  -9   0    1.11    1.12 
 -17   9   0    0.00    0.55 
  16  -9   0    2.21    1.14 
 -16   9   0    1.64    0.53 
  15  -9   0    1.66    1.03 
 -15   9   0    1.33    0.52 
  14  -9   0   -0.28    0.82 
 -14   9   0   -0.36    0.41 
  13  -9   0    6.55    1.20 
 -13   9   0    5.38    0.55 
  12  -9   0    8.33    0.48 
  12  -9   0    8.27    1.22 
 -12   9   0    8.78    0.71 
  11  -9   0    0.53    0.72 
 -11   9   0   -0.08    0.30 
 -11   9   0    0.38    0.34 
  10  -9   0    0.54    0.14 
  10  -9   0    1.05    0.74 
  10  -9   0    0.80    0.41 
 -10   9   0    0.82    0.28 
 -10   9   0    0.63    0.46 
 -10   9   0    0.79    0.33 
 -10   9   0    0.37    0.28 
   9  -9   0    2.23    0.72 
   9  -9   0    2.16    0.42 
  -9   9   0    2.29    0.33 
  -9   9   0    2.34    0.29 
  -9   9   0    1.89    0.43 
  -9   9   0    1.66    0.30 
   8  -9   0   46.62    1.70 
   8  -9   0   48.08    1.73 
  -8   9   0   47.18    1.81 
  -8   9   0   46.81    1.51 
  -8   9   0   44.50    1.15 
  -8   9   0   46.46    1.13 
   7  -9   0   11.27    0.79 
   7  -9   0   12.14    0.87 
  -7   9   0   11.84    0.79 
  -7   9   0   12.09    1.01 
  -7   9   0   11.07    0.75 
  -7   9   0   11.54    0.48 
  -7   9   0   11.52    0.45 
   6  -9   0    0.39    0.50 
  -6   9   0    0.28    0.18 
  -6   9   0    0.54    0.52 
  -6   9   0    0.38    0.35 
  -6   9   0    0.37    0.17 
   5  -9   0   13.07    0.72 
  -5   9   0   13.22    0.90 
  -5   9   0   13.61    0.41 
  -5   9   0   13.96    0.40 
  -5   9   0   13.75    0.78 
   4  -9   0    3.49    0.54 
  -4   9   0    3.65    0.21 
  -4   9   0    2.82    0.37 
  -4   9   0    3.45    0.53 
  -4   9   0    3.59    0.21 
   3  -9   0    7.36    0.62 
  -3   9   0    7.34    0.19 
  -3   9   0    7.63    0.39 
  -3   9   0    7.84    0.60 
  -3   9   0    7.71    0.75 
  -3   9   0    7.46    0.20 
   2  -9   0   26.05    0.92 
  -2   9   0   26.84    0.65 
  -2   9   0   25.12    0.98 
  -2   9   0   26.57    0.90 
  -1   9   0    2.70    0.22 
  -1   9   0    3.19    0.42 
  -1   9   0    3.11    0.20 
   0  -9   0    0.50    0.18 
   0   9   0    0.37    0.35 
   0   9   0    0.48    0.06 
   0   9   0    0.49    0.16 
   0   9   0    0.47    0.06 
   0   9   0    0.48    0.21 
  -1  -9   0   -0.09    0.14 
   1   9   0    0.04    0.14 
   1   9   0    0.07    0.09 
   1   9   0   -0.07    0.34 
   1   9   0    0.07    0.10 
   1   9   0    0.09    0.21 
  -2  -9   0   14.54    0.42 
   2   9   0   14.43    0.40 
   2   9   0   14.91    0.40 
   2   9   0   15.18    0.82 
   2   9   0   14.49    0.40 
  -3  -9   0    6.33    0.61 
  -3  -9   0    6.32    0.28 
   3   9   0    6.55    0.70 
   3   9   0    6.62    0.32 
   3   9   0    6.67    0.33 
   3   9   0    6.70    0.28 
  -4  -9   0   25.99    1.05 
  -4  -9   0   24.32    0.56 
  -4  -9   0   25.86    0.55 
   4   9   0   24.18    0.65 
   4   9   0   26.10    1.06 
   4   9   0   24.77    0.65 
   4   9   0   25.87    0.56 
  -5  -9   0    0.21    0.16 
  -5  -9   0    0.04    0.17 
  -5  -9   0    0.14    0.15 
  -5  -9   0    0.21    0.23 
   5   9   0    0.12    0.21 
   5   9   0    0.31    0.28 
   5   9   0    0.23    0.19 
  -6  -9   0   43.34    0.98 
  -6  -9   0   43.65    1.53 
  -6  -9   0   43.61    0.94 
   6   9   0   43.15    1.53 
   6   9   0   44.19    1.07 
   6   9   0   43.67    1.08 
  -7  -9   0   14.35    0.46 
  -7  -9   0   14.41    0.55 
   7   9   0   15.12    0.73 
   7   9   0   14.77    0.64 
   7   9   0   13.88    0.99 
  -8  -9   0    1.65    0.31 
  -8  -9   0    1.88    0.25 
   8   9   0    1.51    0.39 
   8   9   0    1.74    0.34 
  -9  -9   0   73.73    1.61 
  -9  -9   0   75.40    1.77 
   9   9   0   74.28    1.80 
   9   9   0   76.16    2.43 
 -10  -9   0   45.11    1.29 
 -10  -9   0   44.63    1.17 
  10   9   0   46.52    1.94 
  10   9   0   45.78    1.38 
 -11  -9   0    4.00    0.43 
 -11  -9   0    3.91    0.48 
  11   9   0    2.69    0.52 
  11   9   0    3.67    0.50 
 -12  -9   0    5.34    0.50 
 -12  -9   0    5.01    0.63 
  12   9   0    5.28    0.63 
  12   9   0    6.05    1.14 
 -13  -9   0    1.46    0.34 
 -13  -9   0    1.55    0.45 
  13   9   0    1.15    0.52 
  13   9   0    1.70    0.48 
 -14  -9   0    1.05    0.35 
 -14  -9   0    0.99    0.50 
  14   9   0    0.80    0.51 
  14   9   0    1.01    0.48 
 -15  -9   0    0.08    0.47 
 -15  -9   0    0.26    0.35 
  15   9   0    0.25    0.52 
  15   9   0   -0.10    0.57 
 -16  -9   0    8.54    0.94 
 -16  -9   0    8.26    0.68 
  16   9   0    8.39    0.91 
 -17  -9   0    7.02    0.70 
 -17  -9   0    8.65    1.00 
  17   9   0    6.63    0.78 
 -18  -9   0    1.46    0.66 
 -18  -9   0    1.21    0.46 
  18   9   0    1.54    0.66 
  18   9   0    0.31    0.63 
  17 -10   0    0.85    1.06 
 -17  10   0   -0.21    0.54 
  16 -10   0    0.36    0.89 
 -16  10   0   -0.47    0.48 
  15 -10   0    2.66    1.04 
 -15  10   0    1.78    0.55 
  14 -10   0    0.97    0.94 
 -14  10   0    0.33    0.43 
  13 -10   0   -0.09    0.85 
 -13  10   0    0.07    0.39 
  12 -10   0    0.22    0.79 
 -12  10   0    0.45    0.37 
 -11  10   0    4.43    0.41 
 -11  10   0    6.02    0.57 
  10 -10   0    4.59    0.82 
  10 -10   0    3.44    0.52 
 -10  10   0    2.96    0.53 
 -10  10   0    3.04    0.36 
 -10  10   0    3.77    0.35 
 -10  10   0    3.73    0.40 
   9 -10   0    0.08    0.62 
   9 -10   0    0.18    0.33 
  -9  10   0    0.01    0.43 
  -9  10   0   -0.07    0.26 
  -9  10   0    0.09    0.27 
  -9  10   0    0.14    0.24 
   8 -10   0    0.52    0.33 
   8 -10   0    0.30    0.60 
  -8  10   0    0.29    0.23 
  -8  10   0    0.19    0.24 
  -8  10   0    0.34    0.40 
  -8  10   0   -0.02    0.26 
   7 -10   0   65.90    1.97 
  -7  10   0   67.55    1.42 
  -7  10   0   66.25    1.44 
  -7  10   0   67.93    2.14 
   6 -10   0    9.58    0.81 
  -6  10   0    9.37    0.88 
  -6  10   0    9.32    0.82 
  -6  10   0    9.83    0.42 
  -6  10   0   10.11    0.41 
   5 -10   0   10.79    0.70 
  -5  10   0   11.31    0.91 
  -5  10   0   10.81    0.35 
  -5  10   0   11.47    0.35 
  -5  10   0   11.06    0.75 
   4 -10   0    1.00    0.52 
  -4  10   0    0.49    0.31 
  -4  10   0    1.06    0.50 
  -4  10   0    0.83    0.14 
  -4  10   0    0.77    0.14 
   3 -10   0    4.50    0.58 
  -3  10   0    4.54    0.15 
  -3  10   0    4.17    0.34 
  -3  10   0    4.38    0.72 
  -3  10   0    4.42    0.15 
  -3  10   0    4.61    0.56 
   2 -10   0   37.10    1.24 
  -2  10   0   37.78    1.39 
  -2  10   0   38.41    1.23 
  -2  10   0   37.13    0.93 
  -1  10   0   51.29    1.52 
  -1  10   0   52.58    1.17 
  -1  10   0   52.67    1.51 
   0 -10   0   73.30    1.50 
   0  10   0   72.46    1.32 
   0  10   0   74.21    1.88 
   0  10   0   74.41    1.49 
   0  10   0   72.26    1.32 
   0  10   0   75.42    1.95 
  -1 -10   0   12.15    0.46 
   1  10   0   12.25    0.43 
   1  10   0   13.11    0.38 
   1  10   0   11.74    0.82 
   1  10   0   12.88    0.79 
   1  10   0   12.74    0.37 
  -2 -10   0    0.75    0.17 
   2  10   0    0.73    0.14 
   2  10   0    0.44    0.24 
   2  10   0    0.76    0.16 
   2  10   0    0.73    0.43 
   2  10   0    0.60    0.15 
  -3 -10   0    4.95    0.28 
   3  10   0    5.24    0.31 
   3  10   0    5.42    0.28 
   3  10   0    5.24    0.33 
   3  10   0    5.26    0.71 
  -4 -10   0    5.80    0.29 
  -4 -10   0    6.05    0.20 
  -4 -10   0    6.20    0.65 
  -4 -10   0    6.51    0.21 
   4  10   0    6.05    0.37 
   4  10   0    6.63    0.71 
   4  10   0    6.50    0.36 
   4  10   0    6.53    0.29 
  -5 -10   0   25.55    0.62 
  -5 -10   0   25.57    0.61 
  -5 -10   0   25.67    0.61 
  -5 -10   0   26.57    1.21 
   5  10   0   26.03    0.74 
   5  10   0   26.22    1.18 
   5  10   0   25.47    0.73 
  -6 -10   0    0.12    0.15 
  -6 -10   0    0.21    0.27 
  -6 -10   0    0.15    0.18 
   6  10   0   -0.04    0.24 
   6  10   0    0.25    0.31 
   6  10   0    0.30    0.22 
  -7 -10   0    6.96    0.42 
  -7 -10   0    6.49    0.34 
   7  10   0    6.38    0.83 
   7  10   0    6.73    0.51 
   7  10   0    7.70    0.74 
  -8 -10   0    2.53    0.31 
  -8 -10   0    2.08    0.24 
   8  10   0    2.07    0.34 
   8  10   0    1.82    0.40 
  -9 -10   0   26.62    0.72 
  -9 -10   0   28.52    0.85 
   9  10   0   27.35    0.90 
   9  10   0   27.93    1.42 
 -10 -10   0    2.96    0.32 
 -10 -10   0    2.95    0.40 
  10  10   0    3.18    0.44 
  10  10   0    2.36    0.49 
 -11 -10   0    0.53    0.39 
 -11 -10   0    0.53    0.27 
  11  10   0    0.63    0.44 
  11  10   0    0.49    0.44 
 -12 -10   0    1.30    0.44 
 -12 -10   0    1.41    0.33 
  12  10   0    0.90    0.47 
  12  10   0    1.31    0.45 
 -13 -10   0    1.82    0.35 
 -13 -10   0    1.50    0.48 
  13  10   0    0.86    0.49 
  13  10   0    1.98    0.51 
 -14 -10   0    3.18    0.42 
 -14 -10   0    3.48    0.58 
  14  10   0    2.73    0.57 
 -15 -10   0    2.30    0.53 
 -15 -10   0    2.22    0.39 
  15  10   0    1.57    0.58 
  15  10   0    2.25    0.58 
 -16 -10   0    1.63    0.41 
 -16 -10   0    2.13    0.61 
  16  10   0    1.83    0.61 
 -17 -10   0    0.73    0.42 
 -17 -10   0    0.53    0.59 
  17  10   0    0.28    0.59 
  17  10   0   -0.30    0.57 
 -18 -10   0   -0.29    0.53 
 -18 -10   0    0.00    0.42 
  18  10   0   -0.72    0.60 
  18  10   0    0.23    0.63 
  16 -11   0    1.03    1.01 
 -16  11   0   -0.28    0.48 
  15 -11   0    0.63    0.91 
 -15  11   0   -0.05    0.46 
  14 -11   0    1.24    0.92 
 -14  11   0    0.45    0.42 
  13 -11   0    0.30    0.83 
 -13  11   0   -0.38    0.38 
  12 -11   0    0.16    0.77 
 -12  11   0    0.11    0.37 
  11 -11   0   -0.02    0.73 
 -11  11   0   -0.31    0.30 
 -11  11   0   -0.25    0.50 
 -11  11   0    0.15    0.34 
  10 -11   0    0.39    0.72 
 -10  11   0    0.07    0.47 
 -10  11   0    0.08    0.31 
 -10  11   0   -0.21    0.28 
   9 -11   0   11.19    0.93 
   9 -11   0   12.12    0.99 
  -9  11   0   10.66    1.20 
  -9  11   0   11.38    0.53 
  -9  11   0   10.46    0.89 
  -9  11   0   10.92    0.58 
   8 -11   0    2.54    0.72 
  -8  11   0    2.27    0.27 
  -8  11   0    2.24    0.30 
  -8  11   0    1.54    0.45 
   7 -11   0   31.49    1.28 
  -7  11   0   32.79    1.51 
  -7  11   0   32.59    0.83 
  -7  11   0   32.34    0.79 
   6 -11   0    1.10    0.59 
  -6  11   0    1.05    0.70 
  -6  11   0    1.31    0.20 
  -6  11   0    0.99    0.39 
  -6  11   0    1.33    0.20 
   5 -11   0    0.48    0.54 
  -5  11   0    0.80    0.40 
  -5  11   0    0.58    0.16 
  -5  11   0    0.52    0.55 
  -5  11   0    0.58    0.16 
   4 -11   0    2.79    0.63 
  -4  11   0    2.61    0.22 
  -4  11   0    3.17    0.63 
  -4  11   0    2.54    0.21 
   3 -11   0    0.41    0.48 
  -3  11   0    0.14    0.08 
  -3  11   0    0.22    0.46 
  -3  11   0    0.15    0.08 
  -3  11   0   -0.04    0.32 
  -2  11   0   28.44    0.76 
  -2  11   0   29.20    1.07 
  -2  11   0   28.29    1.23 
  -1  11   0   13.86    0.77 
  -1  11   0   13.57    0.48 
  -1  11   0   13.14    0.79 
   0 -11   0   76.35    1.57 
   0  11   0   78.09    1.57 
   0  11   0   78.19    2.01 
   0  11   0   76.86    1.40 
   0  11   0   76.08    1.40 
   0  11   0   77.71    2.03 
  -1 -11   0   13.72    0.44 
   1  11   0   13.60    0.35 
   1  11   0   13.38    0.35 
   1  11   0   13.75    0.76 
   1  11   0   12.97    0.80 
   1  11   0   13.60    0.42 
  -2 -11   0   17.44    0.51 
   2  11   0   17.03    0.88 
   2  11   0   17.42    0.48 
   2  11   0   17.23    0.47 
   2  11   0   16.34    0.88 
   2  11   0   17.31    0.49 
  -3 -11   0    1.37    0.21 
   3  11   0    1.47    0.19 
   3  11   0    0.82    0.30 
   3  11   0    1.21    0.21 
   3  11   0    1.38    0.20 
  -4 -11   0    0.69    0.24 
  -4 -11   0    0.70    0.16 
   4  11   0    0.77    0.16 
   4  11   0    0.59    0.21 
   4  11   0    0.65    0.18 
   4  11   0    0.48    0.26 
  -5 -11   0   11.57    0.91 
  -5 -11   0   11.59    0.34 
  -5 -11   0   10.59    0.39 
   5  11   0   10.66    0.49 
   5  11   0   11.75    0.50 
   5  11   0   11.55    0.98 
  -6 -11   0    6.01    0.34 
  -6 -11   0    5.86    0.35 
   6  11   0    5.75    0.45 
   6  11   0    6.39    0.86 
   6  11   0    6.15    0.49 
  -7 -11   0    5.09    0.39 
  -7 -11   0    4.47    0.33 
   7  11   0    4.65    0.51 
   7  11   0    4.74    0.86 
  -8 -11   0    1.34    0.21 
  -8 -11   0    1.55    0.28 
   8  11   0    1.19    0.38 
   8  11   0    1.56    0.36 
  -9 -11   0   11.65    0.63 
  -9 -11   0   11.87    0.50 
   9  11   0   13.09    1.21 
   9  11   0   11.89    0.74 
 -10 -11   0    2.52    0.40 
 -10 -11   0    2.77    0.30 
  10  11   0    2.70    0.48 
  10  11   0    2.00    0.48 
 -11 -11   0    2.95    0.43 
 -11 -11   0    3.08    0.31 
  11  11   0    2.41    0.49 
  11  11   0    2.63    0.44 
 -12 -11   0    1.63    0.43 
 -12 -11   0    2.15    0.34 
  12  11   0    1.76    0.47 
  12  11   0    1.18    0.51 
 -13 -11   0    2.98    0.38 
 -13 -11   0    2.53    0.47 
  13  11   0    3.12    0.62 
 -14 -11   0    2.02    0.37 
 -14 -11   0    1.73    0.47 
  14  11   0    2.26    0.61 
  14  11   0    1.08    0.55 
 -15 -11   0    0.35    0.34 
 -15 -11   0   -0.02    0.49 
  15  11   0   -0.28    0.49 
  15  11   0   -0.31    0.59 
 -16 -11   0    0.04    0.52 
 -16 -11   0    0.22    0.35 
  16  11   0    0.34    0.56 
  16  11   0   -0.28    0.54 
 -17 -11   0    3.06    0.50 
 -17 -11   0    2.80    0.67 
  17  11   0    2.69    0.69 
  16 -12   0    2.20    1.06 
 -16  12   0    0.76    0.53 
  15 -12   0    1.85    1.01 
 -15  12   0    0.47    0.48 
  14 -12   0    0.72    0.86 
 -14  12   0   -0.13    0.43 
  13 -12   0    0.27    0.79 
 -13  12   0   -0.06    0.40 
  12 -12   0    1.31    0.83 
 -12  12   0    0.63    0.38 
  11 -12   0    3.73    0.93 
 -11  12   0    3.03    0.43 
  10 -12   0    0.02    0.67 
 -10  12   0   -0.16    0.30 
 -10  12   0   -0.25    0.50 
 -10  12   0    0.12    0.32 
   9 -12   0   17.06    1.19 
  -9  12   0   15.18    1.02 
  -9  12   0   16.09    0.66 
  -9  12   0   16.18    1.38 
   8 -12   0    0.64    0.62 
  -8  12   0    0.21    0.28 
  -8  12   0    0.81    0.24 
  -8  12   0    0.43    0.45 
  -8  12   0    0.63    0.25 
   7 -12   0    1.91    0.65 
  -7  12   0    1.40    0.46 
  -7  12   0    1.71    0.24 
  -7  12   0    1.86    0.24 
   6 -12   0    7.40    0.79 
  -6  12   0    7.63    0.36 
  -6  12   0    7.27    0.98 
  -6  12   0    7.74    0.35 
   5 -12   0    1.14    0.59 
  -5  12   0    1.34    0.17 
  -5  12   0    1.54    0.75 
  -5  12   0    1.35    0.17 
  -5  12   0    1.20    0.43 
   4 -12   0   -0.16    0.48 
  -4  12   0    0.22    0.12 
  -4  12   0    0.07    0.33 
  -4  12   0    0.24    0.13 
  -4  12   0    0.15    0.49 
   3 -12   0    0.00    0.49 
  -3  12   0    0.05    0.08 
  -3  12   0   -0.11    0.34 
  -3  12   0    0.05    0.08 
  -3  12   0    0.14    0.47 
  -2  12   0    2.83    0.32 
  -2  12   0    3.06    0.41 
  -1  12   0    5.27    0.16 
  -1  12   0    5.42    0.71 
  -1  12   0    5.31    0.16 
  -1  12   0    5.44    0.39 
  -1  12   0    5.65    0.65 
   0  12   0   -0.09    0.10 
   0  12   0    0.05    0.26 
   0  12   0    0.00    0.19 
   0  12   0   -0.13    0.10 
   0  12   0    0.38    0.45 
  -1 -12   0    8.66    0.40 
   1  12   0    8.40    0.71 
   1  12   0    8.29    0.30 
   1  12   0    8.06    0.31 
   1  12   0    8.48    0.37 
   1  12   0    8.31    0.79 
  -2 -12   0   28.76    0.68 
   2  12   0   28.93    0.65 
   2  12   0   29.66    0.68 
   2  12   0   29.05    1.13 
   2  12   0   29.01    1.15 
   2  12   0   29.35    0.66 
  -3 -12   0    7.91    0.38 
   3  12   0    8.49    0.41 
   3  12   0    8.28    0.81 
   3  12   0    8.53    0.41 
   3  12   0    8.18    0.36 
  -4 -12   0   13.61    0.47 
   4  12   0   14.04    0.99 
   4  12   0   14.29    0.54 
   4  12   0   13.71    0.45 
   4  12   0   13.95    0.54 
  -5 -12   0   17.99    0.51 
   5  12   0   18.90    0.63 
   5  12   0   18.49    0.64 
   5  12   0   19.19    1.16 
  -6 -12   0    9.00    0.36 
   6  12   0    9.20    0.51 
   6  12   0    9.52    0.49 
   6  12   0    9.09    0.90 
  -7 -12   0    1.35    0.20 
  -7 -12   0    1.35    0.22 
   7  12   0    1.02    0.36 
   7  12   0    1.14    0.31 
  -8 -12   0    2.76    0.30 
  -8 -12   0    2.76    0.24 
   8  12   0    1.96    0.42 
   8  12   0    2.71    0.40 
  -9 -12   0   32.95    0.84 
  -9 -12   0   34.08    0.96 
   9  12   0   34.99    1.73 
   9  12   0   33.31    1.11 
 -10 -12   0    0.36    0.32 
 -10 -12   0    0.46    0.24 
  10  12   0    0.22    0.44 
  10  12   0    0.29    0.38 
 -11 -12   0    1.50    0.28 
 -11 -12   0    0.94    0.36 
  11  12   0    1.19    0.47 
  11  12   0    1.10    0.51 
 -12 -12   0    0.66    0.40 
 -12 -12   0    0.89    0.30 
  12  12   0    0.46    0.45 
  12  12   0    0.13    0.50 
 -13 -12   0   -0.05    0.27 
 -13 -12   0   -0.14    0.39 
  13  12   0   -0.12    0.44 
  13  12   0   -0.44    0.46 
 -14 -12   0   -0.19    0.43 
 -14 -12   0   -0.09    0.30 
  14  12   0   -0.15    0.47 
 -15 -12   0   -0.08    0.46 
 -15 -12   0   -0.13    0.32 
  15  12   0   -0.54    0.53 
  15  12   0    0.12    0.52 
 -16 -12   0    0.32    0.47 
 -16 -12   0    0.12    0.34 
  16  12   0   -0.63    0.57 
  16  12   0    0.12    0.55 
 -17 -12   0    0.62    0.58 
  17  12   0   -0.39    0.63 
  17  12   0    1.30    0.65 
  15 -13   0    1.23    0.89 
 -15  13   0   -0.11    0.45 
  14 -13   0    0.93    0.80 
 -14  13   0   -0.14    0.43 
  13 -13   0    0.94    0.84 
 -13  13   0   -0.06    0.38 
  12 -13   0    1.17    0.81 
 -12  13   0    0.23    0.36 
  11 -13   0    3.38    0.93 
 -11  13   0    2.52    0.43 
 -11  13   0    1.50    0.59 
  10 -13   0    9.17    0.98 
 -10  13   0    9.04    0.62 
   9 -13   0    9.69    1.04 
  -9  13   0    7.52    0.90 
  -9  13   0    8.84    0.55 
  -9  13   0    7.90    1.23 
   8 -13   0    0.05    0.63 
  -8  13   0   -0.05    0.49 
  -8  13   0    0.12    0.24 
   7 -13   0    0.25    0.61 
  -7  13   0    0.22    0.47 
  -7  13   0    0.17    0.20 
  -7  13   0    0.29    0.22 
   6 -13   0    0.38    0.58 
  -6  13   0    0.14    0.18 
  -6  13   0    0.04    0.42 
  -6  13   0    0.20    0.18 
   5 -13   0   10.97    0.89 
  -5  13   0   10.87    0.37 
  -5  13   0   10.74    0.37 
  -5  13   0   11.67    1.11 
   4 -13   0    2.02    0.60 
  -4  13   0    1.89    0.14 
  -4  13   0    1.83    0.14 
  -4  13   0    1.51    0.42 
  -3  13   0    1.20    0.14 
  -3  13   0    1.85    0.63 
  -3  13   0    1.11    0.14 
  -3  13   0    0.99    0.43 
  -2  13   0    7.70    0.72 
  -2  13   0    8.54    0.71 
  -2  13   0    7.98    0.19 
  -2  13   0    7.93    0.94 
  -1  13   0    8.89    0.24 
  -1  13   0    9.42    0.74 
  -1  13   0    8.95    0.53 
  -1  13   0    9.01    0.80 
  -1  13   0    8.70    0.24 
   0  13   0   31.23    0.66 
   0  13   0   32.61    1.31 
   0  13   0   31.99    0.82 
   0  13   0   30.94    0.66 
   0  13   0   32.49    1.24 
  -1 -13   0    5.12    0.39 
   1  13   0    5.21    0.30 
   1  13   0    5.29    0.30 
   1  13   0    5.39    0.80 
   1  13   0    5.79    0.92 
   1  13   0    5.60    0.37 
  -2 -13   0    2.50    0.26 
   2  13   0    2.47    0.30 
   2  13   0    2.21    0.23 
   2  13   0    2.28    0.28 
   2  13   0    1.80    0.36 
  -3 -13   0    0.57    0.19 
   3  13   0    0.62    0.19 
   3  13   0    0.44    0.32 
   3  13   0    0.57    0.21 
   3  13   0    0.76    0.19 
  -4 -13   0    1.82    0.22 
   4  13   0    1.59    0.25 
   4  13   0    1.94    0.21 
   4  13   0    1.93    0.25 
   4  13   0    1.47    0.34 
  -5 -13   0    1.34    0.22 
   5  13   0    1.64    0.28 
   5  13   0    1.14    0.41 
   5  13   0    1.40    0.30 
  -6 -13   0    4.95    0.34 
  -6 -13   0    5.37    0.21 
  -6 -13   0    5.38    0.22 
   6  13   0    4.90    0.49 
   6  13   0    5.47    0.46 
   6  13   0    6.11    1.02 
  -7 -13   0    0.96    0.21 
  -7 -13   0    0.95    0.19 
   7  13   0    0.60    0.41 
   7  13   0    0.87    0.32 
  -8 -13   0    0.16    0.22 
  -8 -13   0    0.36    0.24 
   8  13   0    0.08    0.39 
   8  13   0    0.29    0.36 
  -9 -13   0   21.59    0.75 
  -9 -13   0   21.14    0.67 
   9  13   0   21.65    0.94 
   9  13   0   21.84    1.50 
 -10 -13   0    0.94    0.34 
 -10 -13   0    0.70    0.24 
  10  13   0    0.34    0.49 
  10  13   0    0.35    0.39 
 -11 -13   0    4.01    0.45 
 -11 -13   0    4.59    0.44 
  11  13   0    4.41    0.59 
 -12 -13   0    1.16    0.40 
 -12 -13   0    1.37    0.32 
  12  13   0    1.23    0.48 
 -13 -13   0    1.23    0.44 
 -13 -13   0    1.29    0.33 
  13  13   0    1.41    0.52 
  13  13   0    0.35    0.53 
 -14 -13   0    0.74    0.44 
 -14 -13   0    0.61    0.31 
  14  13   0   -0.09    0.53 
  14  13   0    0.45    0.50 
 -15 -13   0    1.29    0.37 
 -15 -13   0    1.35    0.53 
  15  13   0    1.22    0.57 
  16  13   0    0.11    0.59 
  14 -14   0    1.48    0.92 
 -14  14   0    0.18    0.44 
  13 -14   0    1.14    0.85 
 -13  14   0    0.09    0.39 
  12 -14   0    2.93    0.92 
 -12  14   0    1.17    0.61 
 -12  14   0    1.89    0.43 
  11 -14   0    5.09    1.02 
 -11  14   0    3.68    0.47 
  10 -14   0    2.45    0.88 
 -10  14   0    1.27    0.36 
 -10  14   0    0.69    0.60 
   9 -14   0    3.08    0.84 
  -9  14   0    1.83    0.62 
  -9  14   0    2.57    0.35 
   8 -14   0    1.35    0.78 
  -8  14   0    0.89    0.28 
  -8  14   0    0.02    0.53 
   7 -14   0    0.93    0.70 
  -7  14   0    0.71    0.24 
  -7  14   0    0.35    0.52 
   6 -14   0    2.24    0.76 
  -6  14   0    1.88    0.27 
  -6  14   0    2.03    0.25 
   5 -14   0    1.05    0.63 
  -5  14   0    0.87    0.17 
  -5  14   0    0.88    0.17 
  -5  14   0    0.67    0.45 
   4 -14   0   19.84    1.07 
  -4  14   0   19.26    0.45 
  -4  14   0   19.71    0.45 
  -4  14   0   20.14    1.31 
  -3  14   0    1.15    0.32 
  -3  14   0    1.16    0.46 
  -3  14   0    1.58    0.16 
  -3  14   0    1.63    0.17 
  -2  14   0    0.03    0.09 
  -2  14   0    0.19    0.36 
  -2  14   0    0.04    0.25 
  -2  14   0    0.03    0.09 
  -1  14   0   19.49    1.03 
  -1  14   0   18.94    0.40 
  -1  14   0   18.55    0.39 
   0  14   0   15.60    0.41 
   0  14   0   15.28    0.54 
   0  14   0   15.20    0.97 
   0  14   0   15.25    0.40 
   1  14   0   19.74    0.62 
   1  14   0   18.85    0.53 
   1  14   0   19.15    0.54 
   1  14   0   19.73    1.13 
  -2 -14   0   13.89    0.51 
   2  14   0   13.60    0.45 
   2  14   0   13.85    1.02 
   2  14   0   14.56    0.46 
   2  14   0   13.94    0.48 
  -3 -14   0    0.06    0.19 
   3  14   0   -0.01    0.21 
   3  14   0    0.02    0.29 
   3  14   0   -0.02    0.18 
   3  14   0    0.00    0.18 
  -4 -14   0    1.03    0.21 
   4  14   0    1.13    0.38 
   4  14   0    1.13    0.24 
   4  14   0    1.13    0.20 
   4  14   0    1.00    0.24 
  -5 -14   0    1.50    0.24 
   5  14   0    0.98    0.40 
   5  14   0    1.38    0.28 
   5  14   0    1.32    0.31 
  -6 -14   0    2.90    0.34 
   6  14   0    2.86    0.41 
   6  14   0    3.27    0.45 
  -7 -14   0    1.27    0.24 
  -7 -14   0    1.38    0.17 
   7  14   0    1.28    0.37 
   7  14   0    0.79    0.46 
  -8 -14   0    0.45    0.22 
  -8 -14   0    0.58    0.21 
   8  14   0    0.60    0.39 
   8  14   0    0.25    0.43 
  -9 -14   0   -0.05    0.22 
  -9 -14   0    0.02    0.24 
   9  14   0   -0.12    0.40 
   9  14   0   -0.17    0.42 
 -10 -14   0    0.14    0.23 
 -10 -14   0    0.16    0.29 
  10  14   0    0.13    0.39 
  10  14   0    0.06    0.45 
 -11 -14   0    2.04    0.43 
 -11 -14   0    2.57    0.31 
  11  14   0    1.81    0.50 
  11  14   0    1.64    0.53 
 -12 -14   0    0.86    0.27 
  12  14   0    0.62    0.48 
  12  14   0    0.29    0.51 
 -13 -14   0    0.65    0.30 
  13  14   0    0.33    0.54 
  13  14   0    0.45    0.50 
  14  14   0    3.51    0.64 
  14  14   0    1.97    0.70 
  15  14   0    0.17    0.65 
  15  14   0    1.32    0.61 
  16  14   0   -0.05    0.59 
  14 -15   0    1.04    0.91 
  13 -15   0    1.80    0.84 
 -13  15   0    0.64    0.43 
  12 -15   0    1.97    0.90 
 -12  15   0    0.50    0.40 
 -12  15   0   -0.12    0.57 
  11 -15   0    3.21    0.90 
 -11  15   0    1.91    0.41 
 -11  15   0    0.99    0.56 
  10 -15   0   11.26    1.16 
 -10  15   0    9.35    0.65 
 -10  15   0    8.35    1.39 
   9 -15   0   18.31    1.31 
  -9  15   0   14.89    1.49 
  -9  15   0   16.37    0.71 
   8 -15   0    6.20    0.96 
  -8  15   0    5.46    0.48 
   7 -15   0    4.31    0.91 
  -7  15   0    2.33    0.62 
  -7  15   0    3.03    0.32 
   6 -15   0    8.98    1.00 
  -6  15   0    8.34    1.25 
  -6  15   0    8.03    0.43 
   5 -15   0    0.44    0.63 
  -5  15   0    0.06    0.17 
  -5  15   0    0.04    0.43 
  -4  15   0    9.19    1.20 
  -4  15   0    8.26    0.84 
  -4  15   0    7.88    0.32 
  -4  15   0    8.15    0.32 
  -3  15   0    0.83    0.13 
  -3  15   0    0.68    0.13 
  -3  15   0    0.54    0.28 
  -3  15   0    0.55    0.40 
  -2  15   0    3.43    0.19 
  -2  15   0    3.84    0.73 
  -2  15   0    3.45    0.20 
  -2  15   0    2.72    0.52 
  -1  15   0    0.90    0.14 
  -1  15   0    0.56    0.31 
  -1  15   0    0.88    0.14 
   0  15   0    0.46    0.32 
   0  15   0    0.58    0.15 
   0  15   0    0.56    0.14 
   1  15   0    0.28    0.16 
   1  15   0    0.27    0.17 
   1  15   0    0.23    0.31 
   1  15   0    0.32    0.22 
  -2 -15   0    0.58    0.24 
   2  15   0    0.54    0.23 
   2  15   0    0.50    0.21 
   2  15   0    0.71    0.20 
   2  15   0    0.58    0.35 
  -3 -15   0    0.64    0.23 
   3  15   0    0.57    0.21 
   3  15   0    0.63    0.34 
   3  15   0    0.66    0.24 
   3  15   0    0.72    0.23 
  -4 -15   0    0.40    0.22 
   4  15   0    0.23    0.35 
   4  15   0    0.36    0.21 
   4  15   0    0.62    0.26 
   4  15   0    0.51    0.26 
  -5 -15   0   -0.10    0.19 
   5  15   0   -0.19    0.34 
   5  15   0    0.00    0.26 
  -6 -15   0    0.83    0.22 
   6  15   0    0.83    0.33 
   6  15   0    0.63    0.41 
  -7 -15   0    3.85    0.34 
   7  15   0    3.85    0.43 
   7  15   0    3.05    0.53 
  -8 -15   0    8.12    0.43 
   8  15   0    8.10    0.66 
   8  15   0    8.27    1.16 
  -9 -15   0    3.44    0.30 
   9  15   0    2.68    0.55 
   9  15   0    3.60    0.51 
 -10 -15   0   -0.09    0.23 
  10  15   0   -0.09    0.43 
  10  15   0   -0.20    0.45 
 -11 -15   0    5.81    0.45 
  11  15   0    4.99    0.60 
  12  15   0    3.62    0.67 
  13  15   0    1.79    0.55 
  13  15   0    0.76    0.58 
  14  15   0    0.14    0.53 
  14  15   0   -0.46    0.56 
  15  15   0    1.34    0.61 
  15  15   0   -0.09    0.61 
  13 -16   0    0.80    0.82 
 -13  16   0    0.07    0.41 
  12 -16   0    2.08    0.91 
 -12  16   0    1.17    0.43 
 -11  16   0    4.31    0.47 
  10 -16   0    2.61    0.91 
 -10  16   0    1.46    0.36 
 -10  16   0    0.93    0.63 
   9 -16   0    0.93    0.77 
  -9  16   0    0.22    0.29 
  -9  16   0   -0.31    0.53 
   8 -16   0    1.35    0.79 
  -8  16   0    1.05    0.28 
  -8  16   0    0.28    0.53 
   7 -16   0    0.89    0.76 
  -7  16   0   -0.08    0.24 
  -7  16   0   -0.28    0.52 
   6 -16   0    4.52    0.92 
  -6  16   0    2.94    0.35 
  -6  16   0    2.06    0.57 
  -5  16   0    1.27    0.20 
  -5  16   0    0.86    0.50 
  -5  16   0    0.91    0.34 
  -4  16   0    0.07    0.15 
  -4  16   0    0.24    0.49 
  -4  16   0    0.15    0.31 
  -3  16   0   14.58    1.02 
  -3  16   0   13.77    0.38 
  -3  16   0   16.03    1.37 
  -3  16   0   13.95    0.44 
  -2  16   0    3.77    0.59 
  -2  16   0    4.87    0.24 
  -2  16   0    4.91    0.24 
  -2  16   0    4.84    0.82 
  -1  16   0    0.23    0.32 
  -1  16   0    0.32    0.14 
  -1  16   0    0.34    0.14 
   0  16   0    2.20    0.25 
   0  16   0    1.65    0.19 
   0  16   0    1.42    0.37 
   1  16   0    0.61    0.28 
   1  16   0    0.52    0.35 
   1  16   0    0.71    0.20 
   2  16   0    0.37    0.29 
   2  16   0    0.34    0.21 
   2  16   0    0.28    0.34 
  -3 -16   0    0.29    0.24 
   3  16   0    0.12    0.35 
   3  16   0    0.06    0.24 
  -4 -16   0    1.50    0.27 
   4  16   0    0.65    0.39 
   4  16   0    1.11    0.30 
  -5 -16   0    2.00    0.26 
   5  16   0    2.03    0.34 
   5  16   0    1.62    0.48 
  -6 -16   0    2.54    0.27 
   6  16   0    1.65    0.49 
   6  16   0    2.16    0.38 
  -7 -16   0    0.84    0.24 
   7  16   0    0.24    0.43 
   7  16   0    0.92    0.37 
  -8 -16   0    0.78    0.24 
   8  16   0    0.68    0.41 
   8  16   0    0.43    0.51 
  -9 -16   0    0.27    0.24 
   9  16   0    0.18    0.41 
   9  16   0   -0.19    0.44 
  10  16   0   -0.26    0.47 
  10  16   0    0.06    0.44 
  11  16   0    0.00    0.55 
  11  16   0    0.29    0.43 
  12  16   0    0.47    0.48 
  12  16   0   -0.53    0.49 
  13  16   0    0.26    0.59 
  13  16   0    0.92    0.58 
  14  16   0    2.24    0.59 
  14  16   0    1.01    0.63 
  12 -17   0    1.82    0.92 
 -12  17   0   -0.21    0.63 
  11 -17   0    1.18    0.82 
 -11  17   0   -0.52    0.59 
 -11  17   0    0.24    0.35 
  10 -17   0    3.00    0.92 
 -10  17   0    1.77    0.37 
  -9  17   0    1.79    0.67 
  -9  17   0    2.71    0.37 
   8 -17   0    3.27    0.89 
  -8  17   0    1.36    0.60 
  -8  17   0    2.39    0.31 
  -7  17   0    2.25    0.62 
   6 -17   0    0.49    0.70 
  -6  17   0   -0.24    0.46 
  -6  17   0    0.22    0.20 
  -6  17   0    0.06    0.31 
  -5  17   0    5.81    0.34 
  -5  17   0    4.75    0.66 
  -5  17   0    6.23    0.87 
  -4  17   0    1.29    0.54 
  -4  17   0    1.15    0.37 
  -3  17   0    0.07    0.34 
  -3  17   0    0.26    0.50 
  -3  17   0    0.00    0.14 
  -2  17   0    9.36    0.97 
  -2  17   0    9.72    1.27 
  -2  17   0    9.13    0.32 
  -1  17   0    1.45    0.18 
  -1  17   0    0.84    0.48 
  -1  17   0    1.00    0.37 
   0  17   0    1.91    0.21 
   0  17   0    1.40    0.38 
   1  17   0    5.55    0.96 
   1  17   0    5.60    0.36 
   2  17   0   18.95    1.21 
   2  17   0   20.00    0.62 
   3  17   0   13.96    0.58 
   3  17   0   13.50    1.12 
  -4 -17   0    0.17    0.23 
   4  17   0   -0.03    0.41 
   4  17   0    0.24    0.27 
  -5 -17   0    0.13    0.21 
   5  17   0    0.01    0.42 
   5  17   0    0.33    0.31 
  -6 -17   0    0.03    0.20 
   6  17   0    0.08    0.33 
   6  17   0   -0.03    0.40 
  -7 -17   0    0.09    0.29 
   7  17   0   -0.17    0.45 
   7  17   0    0.29    0.36 
   8  17   0    0.18    0.39 
   8  17   0   -0.21    0.43 
   9  17   0    0.02    0.47 
   9  17   0   -0.04    0.41 
  10  17   0    0.28    0.49 
  10  17   0    0.61    0.45 
  11  17   0    0.49    0.51 
  11  17   0   -0.32    0.56 
  12  17   0   -0.41    0.51 
  12  17   0    0.75    0.55 
  13  17   0    0.78    0.60 
  13  17   0   -0.23    0.58 
  10 -18   0    2.78    0.96 
 -10  18   0    0.26    0.64 
 -10  18   0    1.42    0.36 
   9 -18   0    0.92    0.80 
  -9  18   0   -0.08    0.27 
   8 -18   0    0.65    0.78 
  -8  18   0    0.24    0.25 
  -8  18   0   -0.46    0.57 
   7 -18   0    1.28    0.77 
  -7  18   0    0.00    0.54 
  -7  18   0    0.47    0.24 
  -6  18   0    0.82    0.22 
  -6  18   0    0.28    0.54 
  -6  18   0    0.54    0.33 
  -5  18   0    0.52    0.33 
  -5  18   0    0.73    0.19 
  -5  18   0    0.27    0.55 
  -4  18   0    1.57    0.38 
  -4  18   0    1.93    0.20 
  -4  18   0    1.68    0.60 
  -3  18   0    1.75    0.53 
  -3  18   0    1.68    0.39 
  -3  18   0    2.15    0.23 
  -2  18   0    8.10    1.01 
  -2  18   0    8.33    1.23 
  -2  18   0    7.65    0.30 
  -1  18   0    1.68    0.51 
  -1  18   0    1.92    0.20 
  -1  18   0    1.57    0.41 
   0  18   0   10.44    1.07 
   0  18   0   10.61    0.42 
   1  18   0    8.86    1.10 
   1  18   0    8.99    0.43 
   2  18   0    2.99    0.29 
   3  18   0   -0.07    0.36 
   3  18   0    0.07    0.25 
   4  18   0    2.49    0.53 
   4  18   0    3.41    0.37 
  -5 -18   0    3.84    0.45 
   5  18   0    3.63    0.41 
   6  18   0    0.72    0.49 
   6  18   0    1.05    0.37 
   7  18   0    1.24    0.40 
   7  18   0    0.62    0.46 
   8  18   0    3.88    0.62 
   9  18   0   10.52    0.80 
   9  18   0   10.61    1.55 
  10  18   0    2.24    0.52 
  10  18   0    1.56    0.64 
  11  18   0    0.69    0.52 
  11  18   0    0.11    0.54 
  12  18   0   -0.63    0.54 
  12  18   0    0.42    0.54 
   9 -19   0    1.26    0.93 
   8 -19   0    0.78    0.76 
  -8  19   0   -0.65    0.59 
  -7  19   0    0.22    0.56 
  -6  19   0   -0.68    0.53 
  -5  19   0    0.08    0.54 
  -4  19   0    0.12    0.33 
  -4  19   0   -0.15    0.51 
  -3  19   0    1.78    0.41 
  -3  19   0    1.76    0.59 
  -2  19   0   -0.04    0.34 
  -2  19   0    0.28    0.52 
  -1  19   0    0.60    0.38 
  -1  19   0    0.70    0.19 
  -1  19   0    0.68    0.48 
   0  19   0   -0.04    0.37 
   0  19   0    0.27    0.19 
   1  19   0    0.32    0.22 
   1  19   0    0.19    0.38 
   2  19   0    1.29    0.44 
   2  19   0    1.51    0.27 
   3  19   0    1.32    0.30 
   3  19   0    0.78    0.44 
   4  19   0    3.25    0.57 
   5  19   0    0.15    0.42 
   5  19   0    0.27    0.32 
   6  19   0    0.36    0.35 
   6  19   0    0.03    0.45 
   7  19   0   -0.13    0.49 
   7  19   0    0.25    0.39 
   8  19   0    0.72    0.53 
   8  19   0    1.66    0.45 
   9  19   0   -0.20    0.50 
   9  19   0    0.35    0.45 
  10  19   0    2.17    0.53 
  10  19   0    1.08    0.59 
  11  19   0    3.57    0.74 
  -6  20   0   -0.48    0.56 
  -5  20   0   -0.34    0.55 
  -4  20   0   -0.33    0.48 
  -3  20   0    1.14    0.61 
  -3  20   0    1.13    0.47 
  -2  20   0    0.62    0.37 
  -2  20   0    0.61    0.54 
  -1  20   0    0.52    0.53 
  -1  20   0    0.24    0.38 
   0  20   0    1.53    0.55 
   0  20   0    0.87    0.42 
   1  20   0    0.21    0.40 
   1  20   0    0.51    0.23 
   2  20   0    1.40    0.45 
   2  20   0    1.95    0.29 
   3  20   0    0.33    0.45 
   3  20   0    0.80    0.30 
   4  20   0    0.53    0.48 
   4  20   0    1.16    0.34 
   5  20   0    0.44    0.44 
   5  20   0    0.74    0.34 
   6  20   0    0.60    0.46 
   6  20   0    1.28    0.40 
   7  20   0    0.23    0.52 
   7  20   0    0.69    0.41 
   8  20   0    0.50    0.42 
   8  20   0   -0.08    0.54 
   9  20   0    3.19    0.72 
  -5  21   0    0.91    0.61 
  -4  21   0    0.54    0.61 
  -3  21   0    0.08    0.59 
  -2  21   0    5.07    0.77 
  -1  21   0    0.97    0.57 
  -1  21   0    0.57    0.44 
   0  21   0    0.89    0.51 
   0  21   0    0.05    0.40 
   1  21   0    2.44    0.52 
   2  21   0    0.94    0.35 
   2  21   0    0.13    0.43 
   3  21   0    0.68    0.30 
   3  21   0   -0.19    0.43 
   4  21   0    2.10    0.37 
   4  21   0    1.14    0.49 
   5  21   0    0.31    0.34 
   5  21   0   -0.12    0.43 
   6  21   0    0.54    0.39 
   7  21   0   -0.41    0.47 
   7  21   0    0.32    0.42 
  -1  22   0    2.40    0.63 
   0  22   0    2.81    0.69 
   1  22   0    5.74    1.18 
   2  22   0   -0.31    0.43 
   3  22   0   -0.45    0.45 
   6  21  -1    0.12    0.37 
   6  21  -1   -0.41    0.49 
   5  21  -1   -0.05    0.48 
   5  21  -1    0.94    0.37 
   4  21  -1    0.24    0.33 
   4  21  -1   -0.38    0.43 
   3  21  -1    0.52    0.30 
   3  21  -1   -0.37    0.43 
   2  21  -1   -0.15    0.43 
   1  21  -1    0.58    0.44 
   0  21  -1    3.83    0.60 
  -1  21  -1    2.81    0.64 
  -2  21  -1    0.89    0.60 
  -3  21  -1   -0.12    0.59 
  -4  21  -1    0.37    0.63 
  -5  21  -1   -0.51    0.62 
   8  20  -1    0.34    0.53 
   8  20  -1    1.29    0.48 
   7  20  -1    0.05    0.41 
   7  20  -1   -0.26    0.46 
   6  20  -1   -0.26    0.44 
   6  20  -1    0.14    0.37 
   5  20  -1    1.34    0.38 
   5  20  -1    0.50    0.49 
   4  20  -1    2.47    0.55 
   3  20  -1    0.43    0.29 
   3  20  -1    0.11    0.43 
   2  20  -1    0.05    0.25 
   2  20  -1   -0.21    0.40 
   1  20  -1    0.32    0.24 
   1  20  -1   -0.03    0.40 
   0  20  -1    0.66    0.48 
   0  20  -1   -0.07    0.36 
  -1  20  -1   -0.06    0.37 
  -1  20  -1    0.27    0.48 
  -2  20  -1    1.94    0.62 
  -2  20  -1    1.40    0.43 
  -3  20  -1    0.13    0.57 
  -4  20  -1    0.07    0.57 
  -5  20  -1    0.21    0.60 
  -6  20  -1   -0.28    0.54 
  -7  20  -1    0.16    0.62 
  10  19  -1    2.89    0.65 
   9  19  -1    4.95    0.59 
   9  19  -1    3.37    0.70 
   8  19  -1    2.17    0.47 
   8  19  -1    1.54    0.58 
   7  19  -1   -0.02    0.49 
   7  19  -1    0.59    0.42 
   6  19  -1    3.45    0.60 
   5  19  -1    1.83    0.38 
   5  19  -1    1.12    0.46 
   4  19  -1    0.32    0.31 
   4  19  -1   -0.03    0.42 
   3  19  -1    1.22    0.47 
   3  19  -1    1.98    0.33 
   2  19  -1    2.07    0.47 
   1  19  -1    0.53    0.23 
   1  19  -1    0.05    0.38 
   0  19  -1   -0.09    0.18 
   0  19  -1   -0.17    0.35 
  -1  19  -1    2.70    0.63 
  -1  19  -1    2.31    0.44 
  -2  19  -1    1.75    0.59 
  -2  19  -1    1.60    0.39 
  -3  19  -1    0.93    0.36 
  -3  19  -1    0.85    0.57 
  -4  19  -1    2.92    0.57 
  -4  19  -1    2.66    0.63 
  -5  19  -1    0.14    0.55 
  -6  19  -1   -0.38    0.56 
  -7  19  -1   -0.24    0.52 
  -8  19  -1   -0.51    0.62 
  11  18  -1    2.41    0.60 
  10  18  -1    2.76    0.58 
   9  18  -1   -0.30    0.48 
   9  18  -1    0.09    0.44 
   8  18  -1    0.55    0.43 
   8  18  -1   -0.12    0.45 
   7  18  -1    1.84    0.43 
   7  18  -1    1.09    0.52 
   6  18  -1    0.09    0.35 
   6  18  -1   -0.15    0.45 
   5  18  -1    1.24    0.36 
   5  18  -1    0.83    0.46 
  -5 -18   1    1.31    0.28 
   4  18  -1    6.77    1.02 
   4  18  -1    8.40    0.57 
  -4 -18   1    7.80    0.49 
   3  18  -1    4.83    0.46 
  -3 -18   1    4.93    0.45 
   2  18  -1    3.14    0.48 
   1  18  -1    0.23    0.38 
   1  18  -1    0.30    0.21 
   0  18  -1    0.38    0.36 
   0  18  -1    0.46    0.18 
  -1  18  -1    0.02    0.34 
  -1  18  -1    0.18    0.49 
  -1  18  -1    0.22    0.15 
  -2  18  -1    1.39    0.57 
  -2  18  -1    1.07    0.35 
  -2  18  -1    1.17    0.14 
  -3  18  -1   -0.07    0.45 
  -3  18  -1   -0.07    0.31 
  -4  18  -1    0.15    0.53 
  -4  18  -1    0.07    0.31 
  -5  18  -1    0.56    0.56 
  -5  18  -1    0.76    0.33 
  -6  18  -1    0.12    0.55 
  -7  18  -1    0.10    0.57 
  -8  18  -1   -0.66    0.57 
   8 -18   1    0.77    0.71 
  -9  18  -1    0.21    0.33 
  -9  18  -1   -0.62    0.61 
   9 -18   1    1.08    0.77 
 -10  18  -1    0.23    0.31 
 -10  18  -1   -0.57    0.61 
  10 -18   1    1.01    1.29 
  13  17  -1   -0.56    0.57 
  13  17  -1   -0.14    0.58 
  12  17  -1   -0.30    0.56 
  12  17  -1    0.49    0.54 
  11  17  -1   -0.16    0.53 
  11  17  -1    0.28    0.51 
  10  17  -1    0.97    0.53 
  10  17  -1    1.78    0.50 
   9  17  -1    3.35    0.65 
   9  17  -1    4.24    0.54 
   8  17  -1    0.47    0.41 
   8  17  -1   -0.34    0.47 
   7  17  -1    2.24    0.40 
   7  17  -1    1.50    0.44 
  -7 -17   1    2.04    0.27 
   6  17  -1    0.32    0.43 
   6  17  -1    0.45    0.35 
  -6 -17   1    0.57    0.24 
   5  17  -1    1.11    0.48 
   5  17  -1    1.82    0.35 
  -5 -17   1    1.59    0.28 
   4  17  -1    6.69    1.11 
   4  17  -1    7.31    0.54 
  -4 -17   1    7.36    0.48 
   3  17  -1    3.13    0.34 
  -3 -17   1    3.49    0.35 
   2  17  -1    0.15    0.23 
   2  17  -1   -0.05    0.34 
  -2 -17   1    0.30    0.27 
   1  17  -1    1.70    0.44 
   0  17  -1    2.44    0.28 
   0  17  -1    1.69    0.42 
  -1  17  -1    1.56    0.39 
  -1  17  -1    1.72    0.51 
  -2  17  -1    7.57    0.24 
  -2  17  -1    6.95    0.85 
  -2  17  -1    7.58    1.24 
  -3  17  -1    8.83    0.91 
  -3  17  -1    9.19    1.17 
  -3  17  -1    8.29    0.23 
  -4  17  -1    2.60    0.39 
  -4  17  -1    3.43    0.20 
  -4  17  -1    2.69    0.64 
  -5  17  -1    0.15    0.30 
  -5  17  -1   -0.04    0.53 
  -5  17  -1    0.25    0.15 
  -6  17  -1    0.98    0.20 
  -6  17  -1    0.70    0.30 
  -6  17  -1    0.36    0.51 
  -7  17  -1    0.23    0.34 
  -7  17  -1    0.15    0.21 
  -7  17  -1   -0.09    0.55 
   7 -17   1    0.77    0.71 
  -8  17  -1    0.02    0.24 
  -8  17  -1   -0.60    0.56 
   8 -17   1    0.55    0.71 
  -9  17  -1   -0.33    0.58 
  -9  17  -1    0.25    0.28 
   9 -17   1    1.19    0.74 
 -10  17  -1    1.80    0.72 
 -10  17  -1    3.17    0.41 
  10 -17   1    5.05    0.98 
 -11  17  -1    2.13    0.40 
 -11  17  -1    1.32    0.71 
  11 -17   1    3.76    0.94 
 -12  17  -1   -0.85    0.63 
 -12  17  -1   -0.19    0.34 
  12 -17   1    1.09    0.91 
  14  16  -1    0.52    0.56 
  14  16  -1   -0.63    0.60 
  13  16  -1    0.12    0.58 
  13  16  -1    0.96    0.54 
  12  16  -1   -0.23    0.53 
  12  16  -1    0.56    0.53 
  11  16  -1   -0.48    0.49 
  11  16  -1   -0.39    0.47 
  10  16  -1   -0.05    0.47 
  10  16  -1    0.16    0.45 
   9  16  -1    0.49    0.53 
   9  16  -1    0.86    0.44 
  -9 -16   1    1.20    0.28 
   8  16  -1    1.07    0.43 
   8  16  -1    0.98    0.49 
  -8 -16   1    1.40    0.28 
   7  16  -1   -0.01    0.34 
   7  16  -1   -0.18    0.41 
  -7 -16   1    0.07    0.23 
   6  16  -1    0.23    0.43 
   6  16  -1    0.35    0.34 
  -6 -16   1    0.67    0.24 
   5  16  -1    3.03    0.39 
   5  16  -1    2.18    0.47 
  -5 -16   1    3.16    0.33 
   4  16  -1    0.03    0.39 
   4  16  -1    0.31    0.28 
  -4 -16   1    0.28    0.24 
   3  16  -1    3.11    0.50 
   3  16  -1    4.32    0.43 
  -3 -16   1    4.54    0.43 
   2  16  -1    0.58    0.23 
   2  16  -1    0.27    0.34 
  -2 -16   1    0.26    0.26 
   1  16  -1    1.21    0.35 
   1  16  -1    1.60    0.21 
  -1 -16   1    1.67    0.31 
   0  16  -1    1.19    0.18 
   0  16  -1    1.28    0.22 
   0  16  -1    0.90    0.35 
  -1  16  -1    1.82    0.14 
  -1  16  -1    1.34    0.34 
  -1  16  -1    1.90    0.15 
  -2  16  -1    2.41    0.16 
  -2  16  -1    1.86    0.35 
  -2  16  -1    2.18    0.54 
  -3  16  -1    1.17    0.53 
  -3  16  -1    0.91    0.32 
  -4  16  -1    0.51    0.31 
  -4  16  -1    0.36    0.51 
  -4  16  -1    0.34    0.12 
  -5  16  -1    7.41    1.14 
  -5  16  -1    7.96    0.32 
  -5  16  -1    7.89    0.83 
  -6  16  -1    1.34    0.33 
  -6  16  -1    1.29    0.53 
  -6  16  -1    1.43    0.21 
   6 -16   1    2.21    0.72 
  -7  16  -1    0.49    0.22 
  -7  16  -1    0.19    0.49 
   7 -16   1    0.65    0.67 
  -8  16  -1    2.87    0.33 
   8 -16   1    3.75    0.86 
  -9  16  -1   11.38    0.59 
  -9  16  -1   10.36    1.49 
   9 -16   1   13.10    1.13 
 -10  16  -1    4.74    0.77 
 -10  16  -1    6.55    0.55 
 -11  16  -1    0.55    0.34 
 -11  16  -1   -0.26    0.58 
  11 -16   1    1.89    0.84 
 -12  16  -1   -0.16    0.36 
  12 -16   1    1.10    0.81 
 -13  16  -1   -0.31    0.38 
  13 -16   1    1.39    0.84 
  14  15  -1    2.06    0.66 
  14  15  -1    1.26    0.68 
  13  15  -1    1.67    0.55 
  13  15  -1    0.81    0.61 
  12  15  -1    1.34    0.51 
  12  15  -1    0.57    0.55 
  11  15  -1    0.19    0.44 
  11  15  -1   -0.31    0.49 
 -11 -15   1    0.08    0.26 
  10  15  -1    0.89    0.43 
  10  15  -1    0.49    0.49 
 -10 -15   1    1.03    0.29 
   9  15  -1    0.74    0.43 
   9  15  -1    0.19    0.49 
  -9 -15   1    0.71    0.26 
   8  15  -1    5.69    0.54 
  -8 -15   1    5.83    0.43 
   7  15  -1    3.21    0.44 
  -7 -15   1    3.05    0.30 
   6  15  -1    1.26    0.34 
   6  15  -1    0.89    0.43 
  -6 -15   1    1.40    0.25 
   5  15  -1    0.96    0.41 
   5  15  -1    1.35    0.32 
  -5 -15   1    1.36    0.26 
   4  15  -1    4.08    0.47 
   4  15  -1    4.03    0.36 
  -4 -15   1    4.15    0.41 
   3  15  -1   11.50    1.06 
   3  15  -1   10.75    0.51 
   3  15  -1   10.44    0.49 
   3  15  -1   10.08    0.45 
  -3 -15   1   10.49    0.50 
   2  15  -1    5.19    0.45 
   2  15  -1    5.07    0.36 
   2  15  -1    5.24    0.34 
   2  15  -1    5.56    0.87 
  -2 -15   1    4.71    0.41 
   1  15  -1    6.40    0.33 
   1  15  -1    7.23    0.85 
   1  15  -1    6.42    0.33 
  -1 -15   1    6.37    0.45 
   0  15  -1    1.36    0.16 
   0  15  -1    1.09    0.33 
   0  15  -1    1.42    0.16 
  -1  15  -1    1.00    0.12 
  -1  15  -1    0.88    0.29 
  -1  15  -1    0.95    0.12 
  -2  15  -1   16.86    1.24 
  -2  15  -1   17.28    1.04 
  -3  15  -1   18.97    1.08 
  -3  15  -1   19.60    1.32 
  -4  15  -1    0.26    0.10 
  -4  15  -1    0.24    0.28 
  -4  15  -1    0.21    0.11 
  -4  15  -1    0.19    0.43 
  -5  15  -1    0.50    0.15 
  -5  15  -1    0.41    0.27 
  -5  15  -1    0.23    0.44 
  -5  15  -1    0.56    0.14 
  -6  15  -1    0.59    0.53 
  -6  15  -1    1.08    0.21 
   6 -15   1    1.47    0.71 
  -7  15  -1    0.60    0.53 
  -7  15  -1    0.87    0.23 
   7 -15   1    1.39    0.71 
  -8  15  -1   -0.12    0.49 
  -8  15  -1    0.21    0.24 
   8 -15   1    0.37    0.68 
  -9  15  -1   -0.25    0.54 
  -9  15  -1    0.13    0.28 
   9 -15   1    0.50    0.71 
 -10  15  -1    1.42    0.65 
 -10  15  -1    2.00    0.35 
 -11  15  -1    2.72    0.43 
  11 -15   1    4.35    0.96 
 -12  15  -1    0.29    0.61 
 -12  15  -1    1.32    0.41 
 -13  15  -1   -0.48    0.59 
 -13  15  -1   -0.03    0.38 
  13 -15   1    0.62    0.80 
 -14  15  -1   -0.10    0.41 
  14 -15   1    1.58    0.90 
  15  14  -1    0.28    0.68 
  15  14  -1    1.41    0.67 
  14  14  -1   -0.61    0.61 
  14  14  -1    0.22    0.60 
  13  14  -1    1.62    0.59 
  13  14  -1    0.70    0.58 
 -13 -14   1    1.73    0.36 
  12  14  -1    1.85    0.54 
 -12 -14   1    2.20    0.34 
  11  14  -1    0.56    0.53 
  11  14  -1    1.32    0.48 
 -11 -14   1    1.29    0.31 
  10  14  -1    0.27    0.47 
  10  14  -1    0.47    0.44 
 -10 -14   1    0.81    0.28 
   9  14  -1    0.63    0.43 
   9  14  -1    0.46    0.45 
  -9 -14   1    0.57    0.41 
  -9 -14   1    0.75    0.26 
   8  14  -1    5.91    0.65 
   8  14  -1    6.16    1.11 
  -8 -14   1    6.39    0.46 
  -8 -14   1    6.15    0.46 
   7  14  -1    3.86    0.47 
  -7 -14   1    3.74    0.39 
  -7 -14   1    4.15    0.29 
   6  14  -1    1.43    0.42 
   6  14  -1    1.76    0.34 
   6  14  -1    1.88    0.35 
  -6 -14   1    1.65    0.25 
   5  14  -1    0.87    0.25 
   5  14  -1    0.91    0.38 
   5  14  -1    0.77    0.28 
  -5 -14   1    0.61    0.22 
   4  14  -1    8.80    1.04 
   4  14  -1    8.44    0.50 
   4  14  -1    8.54    0.49 
   4  14  -1    8.47    0.43 
  -4 -14   1    8.11    0.45 
   3  14  -1    3.01    0.30 
   3  14  -1    2.79    0.35 
   3  14  -1    2.94    0.35 
  -3 -14   1    2.73    0.31 
   2  14  -1    2.05    0.26 
   2  14  -1    1.43    0.36 
   2  14  -1    1.93    0.24 
   2  14  -1    1.90    0.23 
  -2 -14   1    1.85    0.28 
   1  14  -1    8.35    0.34 
   1  14  -1    8.61    0.84 
   1  14  -1    8.77    0.34 
   1  14  -1    9.14    0.43 
  -1 -14   1    8.59    0.48 
   0  14  -1    2.31    0.35 
   0  14  -1    3.22    0.23 
   0  14  -1    4.10    0.85 
   0  14  -1    2.93    0.22 
   0 -14   1    3.06    0.34 
  -1  14  -1    4.19    0.67 
  -1  14  -1    4.03    0.17 
  -1  14  -1    4.56    0.64 
  -1  14  -1    4.07    0.16 
  -2  14  -1   19.31    1.17 
  -2  14  -1   19.94    0.92 
  -2  14  -1   19.28    0.97 
  -3  14  -1    1.83    0.31 
  -3  14  -1    2.16    0.49 
  -4  14  -1    0.32    0.43 
  -4  14  -1    0.34    0.09 
  -4  14  -1    0.22    0.24 
  -4  14  -1    0.27    0.10 
  -5  14  -1    1.09    0.44 
  -5  14  -1    1.37    0.15 
  -5  14  -1    1.59    0.16 
   5 -14   1    2.16    0.65 
  -6  14  -1    0.05    0.49 
  -6  14  -1    0.33    0.17 
  -6  14  -1    0.28    0.17 
   6 -14   1    0.47    0.61 
  -7  14  -1    0.39    0.53 
  -7  14  -1    0.80    0.24 
   7 -14   1    1.39    0.72 
  -8  14  -1   11.24    1.37 
  -8  14  -1   12.23    0.56 
  -8  14  -1   11.41    1.38 
   8 -14   1   12.69    1.04 
  -9  14  -1   10.31    0.58 
  -9  14  -1    9.29    1.39 
   9 -14   1   12.02    1.11 
 -10  14  -1    6.17    0.58 
  10 -14   1    7.16    0.98 
 -11  14  -1    0.04    0.33 
 -11  14  -1   -0.27    0.56 
  11 -14   1    0.76    0.73 
 -12  14  -1   -0.45    0.54 
 -12  14  -1    0.04    0.35 
  12 -14   1    0.96    0.74 
 -13  14  -1    0.42    0.40 
  13 -14   1    1.51    0.80 
 -14  14  -1   -0.05    0.40 
  14 -14   1    1.26    0.87 
 -15  14  -1   -0.12    0.45 
  15 -14   1    1.79    0.93 
  16  13  -1   -0.04    0.65 
  15  13  -1   -0.75    0.57 
  15  13  -1   -0.07    0.61 
 -15 -13   1    0.14    0.34 
  14  13  -1    2.95    0.66 
 -14 -13   1    2.94    0.61 
 -14 -13   1    3.09    0.42 
  13  13  -1    0.06    0.48 
  13  13  -1   -0.62    0.52 
 -13 -13   1    0.04    0.40 
 -13 -13   1   -0.03    0.30 
  12  13  -1   -0.47    0.47 
  12  13  -1    0.27    0.45 
 -12 -13   1    0.21    0.29 
 -12 -13   1    0.20    0.37 
  11  13  -1    0.11    0.52 
  11  13  -1    0.19    0.43 
 -11 -13   1    0.19    0.34 
 -11 -13   1    0.25    0.27 
  10  13  -1   -0.03    0.44 
  10  13  -1    0.00    0.43 
 -10 -13   1   -0.04    0.25 
 -10 -13   1   -0.04    0.30 
   9  13  -1    0.65    0.45 
   9  13  -1    0.80    0.42 
  -9 -13   1    1.05    0.30 
  -9 -13   1    0.98    0.26 
   8  13  -1    2.19    0.40 
   8  13  -1    1.67    0.53 
  -8 -13   1    2.73    0.32 
  -8 -13   1    2.81    0.38 
   7  13  -1    4.46    0.44 
  -7 -13   1    4.27    0.40 
  -7 -13   1    4.25    0.32 
   6  13  -1    1.60    0.34 
   6  13  -1    1.32    0.40 
   6  13  -1    1.74    0.32 
  -6 -13   1    1.77    0.25 
  -6 -13   1    1.89    0.18 
  -6 -13   1    2.08    0.18 
   5  13  -1    2.90    0.32 
   5  13  -1    2.45    0.43 
   5  13  -1    2.64    0.33 
  -5 -13   1    2.97    0.28 
   4  13  -1    9.31    0.95 
   4  13  -1    9.07    0.44 
   4  13  -1    9.24    0.47 
   4  13  -1    9.23    0.39 
  -4 -13   1    8.96    0.42 
   3  13  -1    4.46    0.36 
   3  13  -1    4.42    0.34 
   3  13  -1    4.20    0.38 
   3  13  -1    4.34    0.75 
  -3 -13   1    4.14    0.37 
   2  13  -1    9.31    0.42 
   2  13  -1    9.68    0.91 
   2  13  -1    8.96    0.40 
   2  13  -1    8.64    0.40 
  -2 -13   1    9.11    0.45 
   1  13  -1    1.40    0.31 
   1  13  -1    1.98    0.25 
   1  13  -1    1.81    0.19 
   1  13  -1    2.37    0.55 
   1  13  -1    1.55    0.18 
  -1 -13   1    2.00    0.28 
   0  13  -1    9.99    0.47 
   0  13  -1   10.51    0.82 
   0  13  -1   10.25    0.75 
   0  13  -1    9.83    0.30 
   0  13  -1   10.31    0.31 
   0 -13   1   10.38    0.52 
  -1  13  -1   15.92    0.83 
  -1  13  -1   15.97    0.88 
   1 -13   1   15.54    0.60 
  -2  13  -1    7.64    0.71 
  -2  13  -1    7.76    0.78 
  -2  13  -1    7.50    1.02 
  -3  13  -1    1.98    0.39 
  -3  13  -1    2.74    0.53 
  -3  13  -1    2.00    0.25 
  -4  13  -1    4.24    0.65 
  -4  13  -1    3.63    0.16 
  -4  13  -1    2.73    0.49 
  -4  13  -1    3.33    0.16 
   4 -13   1    3.94    0.65 
  -5  13  -1    0.57    0.54 
  -5  13  -1    0.33    0.14 
  -5  13  -1    0.38    0.45 
  -5  13  -1    0.23    0.14 
   5 -13   1    0.35    0.53 
  -6  13  -1   10.53    1.05 
  -6  13  -1    9.74    0.35 
  -6  13  -1    9.61    0.37 
   6 -13   1   10.34    0.83 
  -7  13  -1   -0.12    0.19 
  -7  13  -1    0.10    0.49 
  -7  13  -1    0.01    0.19 
   7 -13   1   -0.16    0.56 
  -8  13  -1    2.65    0.36 
  -8  13  -1    3.17    0.62 
  -9  13  -1    0.74    0.30 
  -9  13  -1    0.17    0.53 
   9 -13   1    1.11    0.70 
 -10  13  -1    0.08    0.30 
 -10  13  -1   -0.40    0.54 
  10 -13   1    0.55    0.72 
 -11  13  -1    0.99    0.54 
 -11  13  -1    1.94    0.39 
  11 -13   1    2.74    0.85 
 -12  13  -1    0.48    0.59 
 -12  13  -1    1.33    0.41 
  12 -13   1    2.27    0.87 
 -13  13  -1    1.72    0.44 
  13 -13   1    2.93    0.90 
 -14  13  -1    0.17    0.41 
  14 -13   1    1.82    0.91 
 -15  13  -1    0.65    0.48 
  15 -13   1    1.74    0.92 
  16  12  -1   -0.42    0.57 
  16  12  -1    0.71    0.66 
 -16 -12   1    0.24    0.38 
 -16 -12   1    0.21    0.53 
  15  12  -1    0.16    0.56 
  15  12  -1    0.72    0.55 
 -15 -12   1    0.84    0.37 
 -15 -12   1    0.76    0.51 
  14  12  -1    0.29    0.59 
  14  12  -1    0.72    0.52 
 -14 -12   1    0.93    0.47 
 -14 -12   1    1.26    0.35 
  13  12  -1   -0.51    0.54 
  13  12  -1   -0.22    0.45 
 -13 -12   1   -0.12    0.30 
 -13 -12   1    0.15    0.41 
  12  12  -1    3.14    0.61 
  12  12  -1    4.22    0.57 
 -12 -12   1    4.43    0.42 
 -12 -12   1    4.62    0.52 
  11  12  -1    2.14    0.49 
  11  12  -1    1.15    0.51 
 -11 -12   1    2.22    0.34 
 -11 -12   1    1.91    0.41 
  10  12  -1    2.13    0.45 
  10  12  -1    1.54    0.51 
 -10 -12   1    2.39    0.33 
 -10 -12   1    2.02    0.38 
   9  12  -1    6.05    0.53 
  -9 -12   1    6.55    0.51 
  -9 -12   1    6.40    0.43 
   8  12  -1   17.40    0.74 
   8  12  -1   18.24    1.31 
  -8 -12   1   17.77    0.60 
  -8 -12   1   18.76    0.65 
   7  12  -1    0.23    0.36 
   7  12  -1    0.27    0.34 
  -7 -12   1    0.40    0.22 
  -7 -12   1    0.32    0.22 
   6  12  -1    1.12    0.31 
   6  12  -1    1.16    0.27 
   6  12  -1    1.05    0.39 
  -6 -12   1    1.20    0.23 
  -6 -12   1    1.05    0.15 
   5  12  -1    4.60    0.39 
   5  12  -1    3.88    0.34 
   5  12  -1    3.28    0.43 
  -5 -12   1    4.02    0.32 
   4  12  -1    0.70    0.24 
   4  12  -1    0.84    0.22 
   4  12  -1    0.84    0.19 
   4  12  -1    0.73    0.32 
  -4 -12   1    0.84    0.27 
  -4 -12   1    0.77    0.20 
   3  12  -1    2.25    0.24 
   3  12  -1    1.98    0.24 
   3  12  -1    1.90    0.24 
   3  12  -1    1.41    0.32 
  -3 -12   1    2.10    0.24 
   2  12  -1   17.82    0.51 
   2  12  -1   17.31    0.90 
   2  12  -1   17.62    0.54 
   2  12  -1   17.41    1.01 
   2  12  -1   17.26    0.50 
  -2 -12   1   16.81    0.54 
   1  12  -1   47.46    0.98 
   1  12  -1   48.43    1.58 
   1  12  -1   47.55    1.08 
   1  12  -1   47.62    1.50 
   1  12  -1   47.46    0.98 
  -1 -12   1   47.55    1.11 
   0  12  -1  112.56    2.85 
   0  12  -1  111.78    2.18 
   0  12  -1  112.19    2.18 
   0  12  -1  113.50    2.81 
   0  12  -1  113.36    2.38 
   0 -12   1  113.15    2.40 
  -1  12  -1    7.93    0.66 
  -1  12  -1    8.26    0.43 
  -1  12  -1    8.45    0.75 
   1 -12   1    8.38    0.47 
  -2  12  -1   10.41    0.91 
  -2  12  -1   10.87    0.75 
  -2  12  -1   10.12    0.72 
  -3  12  -1    1.60    0.53 
  -3  12  -1    0.75    0.37 
  -3  12  -1    0.71    0.25 
  -4  12  -1    1.43    0.53 
  -4  12  -1    1.43    0.14 
  -4  12  -1    0.85    0.39 
   4 -12   1    1.43    0.56 
  -5  12  -1    1.80    0.22 
  -5  12  -1    1.61    0.21 
  -5  12  -1    1.22    0.55 
  -5  12  -1    0.86    0.41 
   5 -12   1    1.21    0.57 
  -6  12  -1    0.34    0.40 
  -6  12  -1    0.42    0.16 
  -6  12  -1    0.48    0.54 
  -6  12  -1    0.30    0.17 
   6 -12   1    0.63    0.57 
  -7  12  -1    2.55    0.34 
  -7  12  -1    2.65    0.32 
  -7  12  -1    1.76    0.53 
   7 -12   1    3.04    0.70 
  -8  12  -1    4.86    0.42 
  -8  12  -1    4.97    0.38 
   8 -12   1    4.91    0.80 
  -9  12  -1    2.25    0.34 
  -9  12  -1    2.44    0.54 
 -10  12  -1    3.22    0.38 
 -10  12  -1    3.88    0.64 
 -11  12  -1    0.82    0.34 
 -11  12  -1    0.18    0.55 
  11 -12   1    1.10    0.75 
 -12  12  -1    4.58    0.71 
 -12  12  -1    5.80    0.60 
 -13  12  -1   -0.13    0.39 
  13 -12   1    1.01    0.81 
 -14  12  -1   -0.25    0.41 
  14 -12   1    0.85    0.84 
 -15  12  -1   -0.26    0.43 
  15 -12   1    1.25    0.91 
 -16  12  -1   -0.40    0.47 
  16 -12   1    1.27    0.95 
  17  11  -1    1.03    0.65 
 -17 -11   1    1.54    0.63 
 -17 -11   1    1.28    0.45 
  16  11  -1    5.19    0.74 
 -16 -11   1    5.28    0.70 
 -16 -11   1    4.89    0.53 
  15  11  -1    0.16    0.53 
  15  11  -1   -0.23    0.54 
 -15 -11   1    0.20    0.44 
 -15 -11   1    0.34    0.36 
  14  11  -1   -0.40    0.47 
  14  11  -1   -0.63    0.48 
 -14 -11   1   -0.14    0.32 
 -14 -11   1   -0.47    0.38 
  13  11  -1    5.93    0.70 
 -13 -11   1    6.06    0.72 
 -13 -11   1    6.19    0.55 
  12  11  -1    8.25    0.86 
  12  11  -1    8.28    1.32 
 -12 -11   1    8.04    0.72 
 -12 -11   1    8.41    0.56 
  11  11  -1    1.03    0.47 
  11  11  -1    1.41    0.48 
 -11 -11   1    1.36    0.39 
 -11 -11   1    1.44    0.31 
  10  11  -1    2.55    0.44 
  10  11  -1    2.04    0.53 
 -10 -11   1    3.09    0.42 
 -10 -11   1    2.95    0.34 
   9  11  -1    5.49    0.58 
  -9 -11   1    5.49    0.44 
  -9 -11   1    6.03    0.54 
   8  11  -1    5.30    1.11 
   8  11  -1    4.80    0.59 
  -8 -11   1    3.96    0.43 
  -8 -11   1    3.83    0.40 
   7  11  -1    0.90    0.37 
   7  11  -1    1.65    0.34 
  -7 -11   1    1.47    0.25 
  -7 -11   1    1.26    0.24 
   6  11  -1    2.12    0.40 
   6  11  -1    2.87    0.35 
   6  11  -1    3.30    0.42 
  -6 -11   1    3.02    0.31 
  -6 -11   1    2.84    0.32 
   5  11  -1    1.42    0.34 
   5  11  -1    2.17    0.29 
   5  11  -1    1.90    0.30 
  -5 -11   1    2.47    0.23 
  -5 -11   1    1.82    0.43 
  -5 -11   1    1.96    0.24 
   4  11  -1    1.37    0.20 
   4  11  -1    0.95    0.31 
   4  11  -1    1.32    0.22 
   4  11  -1    1.28    0.24 
  -4 -11   1    1.19    0.27 
  -4 -11   1    1.21    0.20 
   3  11  -1    0.39    0.19 
   3  11  -1    0.68    0.18 
   3  11  -1    0.76    0.18 
   3  11  -1    0.42    0.25 
  -3 -11   1    0.52    0.23 
  -3 -11   1    0.63    0.19 
   2  11  -1   10.33    0.75 
   2  11  -1   10.77    0.41 
   2  11  -1   10.98    0.38 
   2  11  -1   10.66    0.38 
  -2 -11   1   10.45    0.43 
   1  11  -1    6.65    0.69 
   1  11  -1    7.24    0.27 
   1  11  -1    7.59    0.63 
   1  11  -1    7.12    0.27 
   1  11  -1    7.72    0.34 
  -1 -11   1    7.28    0.37 
   0  11  -1    4.50    0.64 
   0  11  -1    4.55    0.19 
   0  11  -1    4.63    0.36 
   0  11  -1    4.20    0.19 
   0  11  -1    4.43    0.57 
   0 -11   1    4.35    0.39 
  -1  11  -1   28.73    0.98 
  -1  11  -1   28.67    0.71 
  -1  11  -1   28.32    1.02 
   1 -11   1   28.04    0.73 
  -2  11  -1   15.02    1.04 
  -2  11  -1   14.03    0.75 
  -2  11  -1   13.93    0.77 
  -2  11  -1   13.60    0.52 
  -3  11  -1   10.92    0.69 
  -3  11  -1   11.43    0.67 
  -3  11  -1   12.13    0.90 
   3 -11   1   11.56    0.72 
  -4  11  -1   21.77    1.25 
  -4  11  -1   21.75    0.95 
  -4  11  -1   20.95    0.44 
  -4  11  -1   21.06    0.44 
   4 -11   1   20.79    0.96 
  -5  11  -1   52.93    1.11 
  -5  11  -1   54.77    1.93 
  -5  11  -1   53.08    1.09 
  -5  11  -1   53.47    1.65 
   5 -11   1   52.66    1.67 
  -6  11  -1   31.21    0.70 
  -6  11  -1   30.75    1.41 
  -6  11  -1   30.97    0.72 
  -6  11  -1   30.98    1.23 
   6 -11   1   30.47    1.21 
  -7  11  -1    0.13    0.56 
  -7  11  -1    0.05    0.39 
  -7  11  -1    0.05    0.18 
  -7  11  -1    0.08    0.20 
   7 -11   1    0.35    0.55 
  -8  11  -1    2.07    0.28 
  -8  11  -1    2.03    0.53 
  -8  11  -1    2.26    0.26 
   8 -11   1    2.65    0.68 
  -9  11  -1    1.26    0.29 
  -9  11  -1    1.49    0.26 
  -9  11  -1    0.93    0.51 
   9 -11   1    1.43    0.63 
 -10  11  -1    0.83    0.31 
 -10  11  -1    0.41    0.29 
 -10  11  -1    0.60    0.54 
  10 -11   1    0.95    0.68 
 -11  11  -1    3.06    0.58 
 -11  11  -1    2.63    0.34 
 -12  11  -1    0.60    0.36 
  12 -11   1    0.77    0.72 
 -13  11  -1    0.30    0.39 
  13 -11   1    0.86    0.84 
 -14  11  -1    0.53    0.43 
  14 -11   1    1.25    0.87 
 -15  11  -1    0.81    0.45 
  15 -11   1    1.87    0.98 
 -16  11  -1    0.21    0.44 
  16 -11   1    0.51    0.87 
 -17  11  -1    0.64    0.54 
  17 -11   1    1.72    1.09 
  17  10  -1    2.53    0.69 
 -17 -10   1    2.71    0.51 
 -17 -10   1    3.05    0.68 
  16  10  -1    0.16    0.59 
  16  10  -1    1.28    0.66 
 -16 -10   1    1.02    0.56 
 -16 -10   1    0.88    0.43 
  15  10  -1   -0.37    0.50 
  15  10  -1   -0.52    0.53 
 -15 -10   1   -0.04    0.45 
 -15 -10   1   -0.18    0.34 
  14  10  -1    0.31    0.50 
  14  10  -1   -0.23    0.50 
 -14 -10   1    0.19    0.34 
 -14 -10   1   -0.03    0.47 
  13  10  -1    0.10    0.47 
  13  10  -1   -0.35    0.47 
 -13 -10   1   -0.28    0.43 
 -13 -10   1    0.07    0.33 
  12  10  -1    0.69    0.45 
  12  10  -1    0.56    0.49 
 -12 -10   1    0.81    0.34 
 -12 -10   1    0.76    0.43 
  11  10  -1    1.56    0.48 
  11  10  -1    1.83    0.44 
 -11 -10   1    1.91    0.33 
 -11 -10   1    1.74    0.41 
  10  10  -1    9.56    1.14 
  10  10  -1    9.19    0.65 
 -10 -10   1    9.29    0.61 
 -10 -10   1    9.15    0.52 
   9  10  -1   24.43    0.93 
   9  10  -1   24.85    1.41 
  -9 -10   1   23.86    0.82 
  -9 -10   1   22.81    0.72 
   8  10  -1    0.30    0.35 
   8  10  -1    0.31    0.31 
  -8 -10   1   -0.23    0.23 
  -8 -10   1    0.13    0.26 
   7  10  -1    3.01    0.40 
   7  10  -1    3.31    0.35 
  -7 -10   1    3.16    0.28 
  -7 -10   1    3.08    0.26 
   6  10  -1    0.14    0.23 
   6  10  -1    0.15    0.29 
   6  10  -1   -0.06    0.24 
  -6 -10   1    0.06    0.19 
  -6 -10   1    0.03    0.18 
   5  10  -1    0.05    0.29 
   5  10  -1   -0.15    0.22 
   5  10  -1   -0.19    0.20 
  -5 -10   1   -0.02    0.14 
  -5 -10   1    0.00    0.24 
  -5 -10   1    0.08    0.17 
  -5 -10   1   -0.04    0.15 
   4  10  -1    0.48    0.27 
   4  10  -1    0.68    0.18 
   4  10  -1    0.84    0.21 
   4  10  -1    0.67    0.23 
  -4 -10   1    0.61    0.19 
  -4 -10   1    0.76    0.12 
  -4 -10   1    0.60    0.28 
  -4 -10   1    0.66    0.11 
   3  10  -1   13.35    0.44 
   3  10  -1   12.94    0.40 
   3  10  -1   13.04    0.78 
   3  10  -1   13.01    0.43 
  -3 -10   1   12.80    0.42 
  -3 -10   1   12.90    0.80 
   2  10  -1   18.61    0.45 
   2  10  -1   18.41    0.84 
   2  10  -1   18.51    0.46 
   2  10  -1   18.27    0.47 
  -2 -10   1   17.88    0.50 
   1  10  -1    0.03    0.12 
   1  10  -1    0.03    0.16 
   1  10  -1   -0.01    0.22 
   1  10  -1   -0.19    0.37 
   1  10  -1    0.14    0.11 
  -1 -10   1   -0.03    0.18 
   0  10  -1   66.73    1.77 
   0  10  -1   67.33    1.44 
   0  10  -1   67.14    1.26 
   0  10  -1   66.89    1.82 
   0  10  -1   67.34    1.26 
   0 -10   1   67.07    1.46 
  -1  10  -1   20.68    0.87 
  -1  10  -1   20.38    0.82 
  -1  10  -1   20.52    0.59 
   1 -10   1   19.78    0.61 
  -2  10  -1   31.24    0.99 
  -2  10  -1   31.04    0.75 
  -2  10  -1   29.85    0.98 
  -2  10  -1   29.61    1.15 
   2 -10   1   30.44    0.78 
  -3  10  -1   17.65    0.66 
  -3  10  -1   16.91    0.92 
  -3  10  -1   17.94    0.75 
   3 -10   1   18.10    0.81 
  -4  10  -1    2.49    0.40 
  -4  10  -1    3.18    0.15 
  -4  10  -1    3.12    0.15 
  -4  10  -1    3.37    0.52 
   4 -10   1    3.47    0.53 
  -5  10  -1    0.36    0.43 
  -5  10  -1    0.18    0.32 
  -5  10  -1    0.46    0.13 
  -5  10  -1    0.39    0.13 
   5 -10   1    0.38    0.43 
  -6  10  -1    2.40    0.61 
  -6  10  -1    1.69    0.44 
  -6  10  -1    2.32    0.28 
  -6  10  -1    2.10    0.26 
   6 -10   1    2.35    0.58 
  -7  10  -1   28.84    1.46 
  -7  10  -1   29.62    0.74 
  -7  10  -1   28.83    1.19 
  -7  10  -1   29.41    0.76 
  -7  10  -1   28.70    1.07 
   7 -10   1   29.06    1.21 
  -8  10  -1   31.16    0.85 
  -8  10  -1   34.49    1.62 
  -8  10  -1   32.58    1.16 
  -8  10  -1   31.65    0.82 
   8 -10   1   32.73    1.34 
   8 -10   1   33.29    1.40 
  -9  10  -1    0.94    0.28 
  -9  10  -1    0.54    0.25 
  -9  10  -1    0.67    0.48 
  -9  10  -1    0.96    0.24 
   9 -10   1    0.87    0.37 
   9 -10   1    1.22    0.61 
 -10  10  -1    1.89    0.34 
 -10  10  -1    1.45    0.30 
 -10  10  -1    1.96    0.31 
 -10  10  -1    1.74    0.54 
  10 -10   1    2.89    0.79 
 -11  10  -1    5.22    0.55 
 -11  10  -1    4.60    0.71 
 -11  10  -1    3.64    0.59 
  11 -10   1    5.36    0.95 
 -12  10  -1    1.98    0.43 
  12 -10   1    2.44    0.92 
 -13  10  -1    3.66    0.50 
  13 -10   1    4.09    1.01 
 -14  10  -1    0.20    0.43 
  14 -10   1    0.81    0.90 
 -15  10  -1    0.74    0.47 
  15 -10   1    1.24    0.95 
 -16  10  -1    1.63    0.52 
  16 -10   1    2.74    1.11 
 -17  10  -1   -0.43    0.51 
  17 -10   1    0.46    0.92 
  18   9  -1   -0.11    0.63 
 -18  -9   1   -0.33    0.43 
 -18  -9   1    0.26    0.63 
  17   9  -1    0.76    0.63 
  17   9  -1   -0.16    0.61 
 -17  -9   1    0.66    0.45 
 -17  -9   1    0.83    0.56 
  16   9  -1    3.03    0.65 
  16   9  -1    1.59    0.63 
 -16  -9   1    2.72    0.49 
 -16  -9   1    2.77    0.63 
  15   9  -1    7.42    0.85 
 -15  -9   1    7.03    0.65 
 -15  -9   1    7.76    0.82 
  14   9  -1    3.25    0.63 
 -14  -9   1    3.45    0.60 
 -14  -9   1    3.66    0.47 
  13   9  -1    1.49    0.54 
  13   9  -1    2.19    0.58 
 -13  -9   1    2.15    0.52 
 -13  -9   1    2.39    0.41 
  12   9  -1    0.25    0.47 
  12   9  -1   -0.07    0.47 
 -12  -9   1   -0.07    0.30 
 -12  -9   1   -0.03    0.42 
  11   9  -1   25.87    1.05 
  11   9  -1   25.79    1.55 
 -11  -9   1   25.02    0.96 
 -11  -9   1   24.57    0.81 
  10   9  -1    0.29    0.41 
 -10  -9   1    0.06    0.26 
 -10  -9   1    0.21    0.32 
   9   9  -1   10.87    0.68 
   9   9  -1   10.73    1.11 
  -9  -9   1   10.30    0.60 
  -9  -9   1    9.58    0.53 
   8   9  -1    6.10    1.03 
   8   9  -1    4.78    0.56 
  -8  -9   1    5.00    0.48 
  -8  -9   1    4.36    0.39 
   7   9  -1    6.54    0.47 
   7   9  -1    6.20    0.82 
  -7  -9   1    5.92    0.35 
  -7  -9   1    6.19    0.45 
   6   9  -1   -0.03    0.23 
   6   9  -1    0.20    0.28 
   6   9  -1    0.13    0.23 
  -6  -9   1    0.20    0.25 
  -6  -9   1   -0.07    0.19 
  -6  -9   1    0.13    0.18 
   5   9  -1    1.08    0.32 
   5   9  -1    1.11    0.26 
   5   9  -1    1.22    0.25 
  -5  -9   1    1.18    0.21 
  -5  -9   1    0.94    0.27 
  -5  -9   1    0.96    0.20 
   4   9  -1    5.17    0.63 
   4   9  -1    5.15    0.29 
   4   9  -1    5.15    0.37 
   4   9  -1    5.26    0.35 
  -4  -9   1    5.42    0.63 
  -4  -9   1    4.55    0.30 
  -4  -9   1    5.09    0.25 
  -4  -9   1    5.46    0.25 
   3   9  -1   26.38    0.64 
   3   9  -1   25.99    0.65 
   3   9  -1   26.77    0.66 
   3   9  -1   26.52    1.06 
  -3  -9   1   26.24    1.04 
  -3  -9   1   26.17    0.65 
   2   9  -1   56.91    1.11 
   2   9  -1   56.69    1.12 
   2   9  -1   56.23    1.58 
   2   9  -1   56.21    1.14 
  -2  -9   1   56.47    1.16 
  -2  -9   1   57.55    1.62 
   1   9  -1    0.18    0.11 
   1   9  -1    0.17    0.16 
   1   9  -1    0.19    0.11 
   1   9  -1    0.28    0.34 
   1   9  -1    0.17    0.19 
  -1  -9   1    0.15    0.16 
   0   9  -1    7.51    0.52 
   0   9  -1    7.71    0.33 
   0   9  -1    7.84    0.16 
   0   9  -1    7.66    0.16 
   0   9  -1    7.76    0.55 
   0  -9   1    7.54    0.35 
  -1   9  -1    0.36    0.34 
  -1   9  -1    0.23    0.17 
  -1   9  -1    0.34    0.19 
   1  -9   1    0.35    0.19 
  -2   9  -1   13.94    0.49 
  -2   9  -1   13.33    0.66 
  -2   9  -1   13.50    0.66 
  -2   9  -1   13.04    0.80 
   2  -9   1   12.94    0.46 
  -3   9  -1   22.91    1.03 
  -3   9  -1   22.13    0.63 
  -3   9  -1   22.77    0.84 
   3  -9   1   21.70    0.83 
  -4   9  -1   17.76    1.02 
  -4   9  -1   17.17    0.37 
  -4   9  -1   17.30    0.78 
  -4   9  -1   16.88    0.36 
   4  -9   1   17.18    0.78 
  -5   9  -1    1.62    0.34 
  -5   9  -1    2.65    0.49 
  -5   9  -1    1.98    0.15 
  -5   9  -1    2.08    0.15 
   5  -9   1    2.07    0.44 
  -6   9  -1   34.16    0.80 
  -6   9  -1   34.62    0.78 
  -6   9  -1   33.95    1.44 
  -6   9  -1   34.71    1.22 
   6  -9   1   34.03    1.22 
  -7   9  -1   26.88    1.26 
  -7   9  -1   28.51    0.68 
  -7   9  -1   28.31    1.11 
  -7   9  -1   28.66    0.72 
  -7   9  -1   27.76    1.00 
   7  -9   1   27.41    1.21 
   7  -9   1   27.53    1.12 
  -8   9  -1    1.31    0.24 
  -8   9  -1    1.21    0.25 
  -8   9  -1    1.15    0.45 
  -8   9  -1    1.35    0.27 
  -8   9  -1    1.30    0.58 
   8  -9   1    1.29    0.34 
   8  -9   1    1.30    0.58 
  -9   9  -1    1.80    0.32 
  -9   9  -1    2.05    0.29 
  -9   9  -1    1.43    0.28 
  -9   9  -1    1.34    0.45 
   9  -9   1    1.74    0.40 
   9  -9   1    2.32    0.64 
 -10   9  -1    1.42    0.28 
 -10   9  -1    1.12    0.49 
 -10   9  -1    1.29    0.32 
 -10   9  -1    0.91    0.28 
  10  -9   1    1.78    0.74 
  10  -9   1    1.18    0.43 
 -11   9  -1    0.37    0.26 
 -11   9  -1    0.17    0.32 
  11  -9   1    0.49    0.71 
  11  -9   1    0.03    0.14 
 -12   9  -1    0.66    0.38 
 -12   9  -1    0.38    0.28 
  12  -9   1    0.90    0.74 
 -13   9  -1    1.54    0.43 
  13  -9   1    2.16    0.89 
 -14   9  -1    2.66    0.52 
  14  -9   1    3.74    1.12 
 -15   9  -1    0.54    0.46 
  15  -9   1    0.68    0.87 
 -16   9  -1    3.40    0.54 
  16  -9   1    4.45    1.19 
 -17   9  -1   -0.26    0.51 
  17  -9   1    0.64    1.03 
 -18   9  -1    0.30    0.59 
  18  -9   1    1.41    1.05 
  18   8  -1    1.11    0.72 
  18   8  -1   -0.04    0.70 
  18   8  -1    0.73    1.18 
 -18  -8   1    1.16    0.46 
 -18  -8   1    1.80    0.65 
  17   8  -1    4.08    0.71 
 -17  -8   1    4.42    0.73 
  16   8  -1    2.51    0.64 
  16   8  -1    1.24    0.61 
 -16  -8   1    2.02    0.63 
  15   8  -1   -0.40    0.49 
  15   8  -1   -0.19    0.49 
 -15  -8   1   -0.38    0.45 
  14   8  -1    0.28    0.48 
  14   8  -1   -0.19    0.48 
 -14  -8   1    0.41    0.52 
 -14  -8   1   -0.06    0.35 
  13   8  -1    4.42    0.63 
  13   8  -1    3.09    0.63 
 -13  -8   1    3.41    0.53 
 -13  -8   1    3.67    0.44 
  12   8  -1    2.55    0.54 
  12   8  -1    1.70    0.49 
 -12  -8   1    1.75    0.36 
 -12  -8   1    2.14    0.45 
  11   8  -1    1.78    0.48 
  11   8  -1    2.71    0.52 
 -11  -8   1    2.46    0.43 
 -11  -8   1    2.50    0.38 
  10   8  -1   22.59    0.95 
  10   8  -1   22.72    1.41 
 -10  -8   1   21.04    0.73 
 -10  -8   1   21.54    0.88 
   9   8  -1   91.95    2.13 
   9   8  -1   94.27    2.81 
  -9  -8   1   90.17    2.07 
  -9  -8   1   90.81    1.97 
   8   8  -1   15.34    0.66 
   8   8  -1   16.01    1.09 
  -8  -8   1   14.87    0.64 
  -8  -8   1   15.59    0.55 
   7   8  -1    2.74    0.33 
   7   8  -1    2.68    0.40 
  -7  -8   1    3.29    0.33 
  -7  -8   1    2.72    0.31 
  -7  -8   1    2.26    0.34 
   6   8  -1   41.65    1.06 
   6   8  -1   40.57    1.04 
   6   8  -1   41.62    1.50 
  -6  -8   1   41.74    1.47 
  -6  -8   1   41.26    0.94 
  -6  -8   1   41.32    1.00 
   5   8  -1   70.67    1.64 
   5   8  -1   71.03    2.11 
   5   8  -1   71.23    1.64 
  -5  -8   1   73.13    2.14 
  -5  -8   1   70.24    1.53 
  -5  -8   1   69.86    1.56 
   4   8  -1    5.65    0.36 
   4   8  -1    6.41    0.67 
   4   8  -1    5.48    0.35 
   4   8  -1    5.82    0.30 
  -4  -8   1    5.37    0.30 
  -4  -8   1    5.75    0.30 
  -4  -8   1    5.90    0.63 
  -4  -8   1    5.63    0.28 
   3   8  -1    7.84    0.35 
   3   8  -1    8.03    0.63 
   3   8  -1    7.34    0.34 
   3   8  -1    7.81    0.32 
  -3  -8   1    7.78    0.24 
  -3  -8   1    7.81    0.33 
  -3  -8   1    8.15    0.68 
   2   8  -1   20.39    0.87 
   2   8  -1   20.35    0.52 
   2   8  -1   19.83    0.52 
   2   8  -1   19.93    0.52 
  -2  -8   1   20.34    0.86 
  -2  -8   1   20.22    0.54 
   1   8  -1   -0.06    0.09 
   1   8  -1   -0.02    0.10 
   1   8  -1    0.06    0.19 
   1   8  -1   -0.05    0.15 
  -1  -8   1   -0.07    0.16 
   0   8  -1    2.94    0.44 
   0   8  -1    3.42    0.49 
   0   8  -1    3.17    0.27 
   0  -8   1    3.27    0.30 
  -1   8  -1   17.23    0.67 
  -1   8  -1   16.85    0.64 
  -1   8  -1   16.55    0.47 
   1  -8   1   16.62    0.47 
  -2   8  -1   12.50    0.42 
  -2   8  -1   12.99    0.82 
  -2   8  -1   12.67    0.58 
   2  -8   1   12.30    0.61 
   2  -8   1   12.15    0.43 
  -3   8  -1   14.28    0.64 
  -3   8  -1   13.98    0.50 
  -3   8  -1   14.81    0.83 
   3  -8   1   13.76    0.65 
  -4   8  -1    6.86    0.41 
  -4   8  -1    7.54    0.70 
  -4   8  -1    6.81    0.21 
  -4   8  -1    7.14    0.53 
  -4   8  -1    6.76    0.22 
   4  -8   1    6.63    0.52 
  -5   8  -1    1.27    0.14 
  -5   8  -1    1.51    0.43 
  -5   8  -1    0.88    0.32 
  -5   8  -1    1.25    0.15 
   5  -8   1    1.07    0.42 
  -6   8  -1    4.19    0.28 
  -6   8  -1    4.19    0.31 
  -6   8  -1    4.68    0.60 
  -6   8  -1    5.04    0.75 
   6  -8   1    4.87    0.63 
   6  -8   1    4.54    0.59 
  -7   8  -1    0.09    0.16 
  -7   8  -1    0.13    0.19 
  -7   8  -1    0.00    0.18 
  -7   8  -1   -0.03    0.43 
  -7   8  -1   -0.01    0.36 
   7  -8   1    0.07    0.24 
   7  -8   1   -0.05    0.43 
  -8   8  -1   11.53    0.51 
  -8   8  -1   12.01    0.47 
  -8   8  -1   11.30    0.67 
  -8   8  -1   11.28    1.06 
  -8   8  -1   11.20    0.76 
   8  -8   1   11.14    0.85 
   8  -8   1   10.93    0.84 
  -9   8  -1   22.48    0.66 
  -9   8  -1   23.03    0.74 
  -9   8  -1   22.18    1.34 
  -9   8  -1   21.80    0.92 
   9  -8   1   21.65    1.14 
   9  -8   1   22.34    1.21 
   9  -8   1   21.95    0.47 
   9  -8   1   19.46    0.44 
 -10   8  -1    9.95    1.15 
 -10   8  -1   10.10    0.55 
 -10   8  -1    9.38    0.72 
 -10   8  -1   10.41    0.51 
  10  -8   1    9.60    0.98 
  10  -8   1    9.97    0.94 
  10  -8   1    8.33    0.34 
 -11   8  -1    0.43    0.33 
 -11   8  -1    0.33    0.25 
  11  -8   1    0.48    0.22 
  11  -8   1    0.43    0.63 
 -12   8  -1    9.68    0.68 
 -12   8  -1    7.72    0.79 
  12  -8   1    8.71    1.12 
  12  -8   1    8.85    0.49 
 -13   8  -1    3.86    0.52 
  13  -8   1    3.93    0.98 
  13  -8   1    3.67    0.36 
 -14   8  -1    0.20    0.43 
  14  -8   1    0.20    0.93 
 -15   8  -1    0.52    0.49 
  15  -8   1    1.01    0.92 
 -16   8  -1    0.90    0.52 
  16  -8   1    1.62    1.00 
 -17   8  -1    0.40    0.48 
  17  -8   1    1.25    1.08 
 -18   8  -1   -0.20    0.51 
  18  -8   1    1.06    1.16 
  18   7  -1   -0.35    0.65 
  18   7  -1   -0.52    0.60 
  18   7  -1   -0.21    1.21 
 -18  -7   1   -0.35    0.53 
  17   7  -1   -0.46    0.56 
  17   7  -1    0.02    0.55 
  17   7  -1    0.05    1.05 
 -17  -7   1    0.12    0.53 
  16   7  -1    0.84    0.58 
  16   7  -1    1.74    0.59 
 -16  -7   1    2.18    0.59 
  15   7  -1    0.13    0.50 
  15   7  -1   -0.14    0.52 
 -15  -7   1    0.05    0.49 
  14   7  -1    0.05    0.49 
  14   7  -1   -0.07    0.45 
 -14  -7   1   -0.25    0.43 
  13   7  -1    7.55    1.24 
  13   7  -1    7.68    0.85 
 -13  -7   1    7.48    0.73 
  12   7  -1    0.71    0.48 
  12   7  -1    0.65    0.45 
 -12  -7   1    0.61    0.43 
  11   7  -1   46.18    1.86 
  11   7  -1   46.43    1.35 
 -11  -7   1   46.33    1.28 
  10   7  -1    2.17    0.45 
  10   7  -1    2.87    0.47 
 -10  -7   1    2.93    0.43 
   9   7  -1    2.68    0.39 
  -9  -7   1    3.22    0.42 
  -9  -7   1    2.48    0.31 
   8   7  -1    0.66    0.30 
   8   7  -1    0.52    0.34 
  -8  -7   1    0.68    0.28 
  -8  -7   1    0.73    0.24 
   7   7  -1    3.04    0.36 
   7   7  -1    3.78    0.36 
  -7  -7   1    3.77    0.27 
  -7  -7   1    3.00    0.33 
  -7  -7   1    3.91    0.34 
   6   7  -1   29.31    1.22 
   6   7  -1   29.83    0.82 
   6   7  -1   29.53    0.85 
  -6  -7   1   29.74    0.80 
  -6  -7   1   29.04    1.18 
  -6  -7   1   29.00    0.72 
   5   7  -1    0.26    0.24 
   5   7  -1    0.12    0.22 
   5   7  -1    0.15    0.18 
  -5  -7   1    0.13    0.19 
  -5  -7   1    0.24    0.21 
  -5  -7   1    0.28    0.22 
  -5  -7   1    0.11    0.16 
   4   7  -1   19.17    0.51 
   4   7  -1   19.06    0.53 
   4   7  -1   19.21    0.89 
  -4  -7   1   19.27    0.47 
  -4  -7   1   19.38    0.47 
  -4  -7   1   18.77    0.48 
  -4  -7   1   19.20    0.83 
   3   7  -1   58.99    1.65 
   3   7  -1   60.38    1.29 
   3   7  -1   60.19    1.28 
   3   7  -1   60.09    1.24 
  -3  -7   1   59.99    1.22 
  -3  -7   1   61.85    1.22 
  -3  -7   1   59.15    1.64 
  -3  -7   1   59.92    1.23 
   2   7  -1   68.06    1.73 
   2   7  -1   66.50    1.32 
   2   7  -1   68.75    1.34 
   2   7  -1   67.24    1.33 
  -2  -7   1   67.55    1.34 
  -2  -7   1   68.42    1.74 
   1   7  -1   17.59    0.44 
   1   7  -1   18.07    0.72 
   1   7  -1   17.92    0.37 
   1   7  -1   17.91    0.37 
  -1  -7   1   17.97    0.69 
  -1  -7   1   17.79    0.44 
   0   7  -1    0.81    0.34 
   0   7  -1    0.78    0.17 
   0   7  -1    0.50    0.19 
   0  -7   1    0.83    0.19 
  -1   7  -1    2.98    0.40 
  -1   7  -1    3.29    0.44 
  -1   7  -1    3.48    0.29 
   1  -7   1    3.28    0.30 
  -2   7  -1    0.76    0.30 
  -2   7  -1    0.90    0.18 
  -2   7  -1    0.64    0.24 
   2  -7   1    1.01    0.18 
   2  -7   1    0.80    0.31 
  -3   7  -1    5.13    0.47 
  -3   7  -1    5.29    0.34 
  -3   7  -1    5.19    0.62 
   3  -7   1    4.96    0.50 
  -4   7  -1    1.13    0.30 
  -4   7  -1    1.25    0.36 
  -4   7  -1    1.49    0.12 
  -4   7  -1    1.54    0.12 
  -4   7  -1    1.34    0.22 
   4  -7   1    1.46    0.37 
  -5   7  -1    0.23    0.14 
  -5   7  -1    0.19    0.37 
  -5   7  -1    0.22    0.13 
  -5   7  -1    0.19    0.27 
  -5   7  -1    0.26    0.22 
   5  -7   1    0.22    0.22 
   5  -7   1    0.33    0.35 
  -6   7  -1    0.20    0.30 
  -6   7  -1    0.16    0.17 
  -6   7  -1    0.23    0.39 
  -6   7  -1    0.18    0.14 
  -6   7  -1    0.13    0.15 
   6  -7   1   -0.17    0.37 
   6  -7   1    0.23    0.24 
  -7   7  -1    5.17    0.57 
  -7   7  -1    4.99    0.33 
  -7   7  -1    4.78    0.53 
  -7   7  -1    4.43    0.35 
  -7   7  -1    5.36    0.85 
   7  -7   1    5.38    0.72 
   7  -7   1    4.75    0.17 
   7  -7   1    4.76    0.63 
   7  -7   1    4.72    0.17 
  -8   7  -1    6.13    0.39 
  -8   7  -1    6.77    0.37 
  -8   7  -1    6.34    0.68 
  -8   7  -1    6.42    0.92 
  -8   7  -1    6.09    0.58 
   8  -7   1    6.28    0.27 
   8  -7   1    5.98    0.71 
   8  -7   1    6.27    0.70 
  -9   7  -1   28.94    1.42 
  -9   7  -1   28.81    0.84 
  -9   7  -1   29.02    0.79 
  -9   7  -1   28.69    1.04 
   9  -7   1   28.56    0.68 
   9  -7   1   29.96    1.32 
   9  -7   1   28.48    1.27 
 -10   7  -1    2.87    0.36 
 -10   7  -1    2.84    0.32 
  10  -7   1    2.79    0.79 
  10  -7   1    2.86    0.27 
 -11   7  -1   17.48    0.95 
 -11   7  -1   16.75    0.73 
  11  -7   1   17.27    0.61 
  11  -7   1   17.72    1.14 
  11  -7   1   17.18    1.14 
 -12   7  -1    2.75    0.40 
  12  -7   1    3.15    0.35 
  12  -7   1    3.31    0.92 
 -13   7  -1    1.70    0.42 
  13  -7   1    2.11    0.35 
  13  -7   1    2.03    0.90 
 -14   7  -1    8.64    0.71 
  14  -7   1    8.89    1.34 
  14  -7   1    8.29    0.62 
 -15   7  -1   10.33    0.77 
  15  -7   1   10.77    0.69 
  15  -7   1   11.79    1.48 
 -16   7  -1    3.26    0.60 
  16  -7   1    4.22    1.21 
 -17   7  -1   -0.09    0.53 
  17  -7   1    0.95    1.01 
 -18   7  -1    1.07    0.63 
  18  -7   1    1.68    1.20 
  19   6  -1    1.88    1.32 
  19   6  -1    1.76    0.69 
 -19  -6   1    1.46    0.73 
  18   6  -1    0.37    0.63 
  18   6  -1    0.95    0.68 
  18   6  -1    1.39    1.24 
 -18  -6   1    0.94    0.67 
  17   6  -1    0.14    1.09 
  17   6  -1   -0.35    0.53 
  17   6  -1   -0.50    0.53 
 -17  -6   1   -0.09    0.62 
  16   6  -1   -0.26    0.59 
  16   6  -1   -0.13    0.53 
 -16  -6   1   -0.15    0.57 
  15   6  -1    3.73    0.65 
  15   6  -1    5.05    0.65 
 -15  -6   1    5.30    0.67 
  14   6  -1    0.10    0.52 
  14   6  -1    0.00    0.48 
 -14  -6   1   -0.11    0.46 
  13   6  -1    6.79    1.18 
  13   6  -1    5.57    0.58 
 -13  -6   1    5.82    0.63 
  12   6  -1    0.95    0.43 
  12   6  -1    1.06    0.45 
 -12  -6   1    0.70    0.42 
  11   6  -1    5.22    1.01 
  11   6  -1    4.15    0.49 
 -11  -6   1    4.57    0.57 
  10   6  -1    2.71    0.45 
  10   6  -1    2.96    0.43 
 -10  -6   1    3.65    0.43 
   9   6  -1    4.50    0.85 
   9   6  -1    4.01    0.51 
  -9  -6   1    4.21    0.49 
   8   6  -1    4.56    0.38 
   8   6  -1    4.00    0.42 
  -8  -6   1    4.64    0.38 
  -8  -6   1    3.75    0.36 
   7   6  -1    4.55    0.42 
   7   6  -1    4.28    0.72 
  -7  -6   1    4.45    0.35 
  -7  -6   1    4.00    0.65 
  -7  -6   1    5.12    0.45 
   6   6  -1    7.86    0.43 
   6   6  -1    7.87    0.49 
   6   6  -1    8.04    0.76 
  -6  -6   1    8.08    0.71 
  -6  -6   1    8.00    0.39 
  -6  -6   1    8.13    0.46 
   5   6  -1   47.11    1.47 
   5   6  -1   46.69    1.07 
   5   6  -1   47.67    1.08 
  -5  -6   1   47.23    0.99 
  -5  -6   1   46.81    1.02 
  -5  -6   1   47.22    1.44 
  -5  -6   1   46.40    1.04 
   4   6  -1    9.89    0.44 
   4   6  -1    9.57    0.44 
   4   6  -1   10.22    0.72 
  -4  -6   1    9.83    0.37 
  -4  -6   1    9.89    0.69 
  -4  -6   1    9.56    0.40 
  -4  -6   1    9.12    0.39 
   3   6  -1   22.20    0.78 
   3   6  -1   22.19    0.49 
   3   6  -1   21.85    0.44 
   3   6  -1   21.85    0.49 
  -3  -6   1   22.60    0.82 
  -3  -6   1   21.98    0.44 
  -3  -6   1   22.24    0.45 
  -3  -6   1   21.47    0.44 
   2   6  -1   30.93    1.00 
   2   6  -1   31.23    0.69 
   2   6  -1   31.81    0.69 
   2   6  -1   30.76    0.68 
  -2  -6   1   31.03    0.69 
  -2  -6   1   32.33    0.63 
  -2  -6   1   30.53    0.99 
   1   6  -1    1.22    0.19 
   1   6  -1    1.50    0.16 
   1   6  -1    1.32    0.12 
   1   6  -1    1.35    0.12 
  -1  -6   1    1.51    0.17 
  -1  -6   1    1.24    0.20 
   0   6  -1    0.84    0.30 
   0   6  -1    0.71    0.15 
   0   6  -1    0.62    0.16 
   0  -6   1    0.72    0.16 
  -1   6  -1    9.36    0.47 
  -1   6  -1    9.68    0.34 
  -1   6  -1    9.84    0.48 
   1  -6   1    9.76    0.37 
  -2   6  -1   19.94    0.86 
  -2   6  -1   19.73    0.70 
  -2   6  -1   20.43    0.55 
   2  -6   1   19.96    0.56 
   2  -6   1   19.90    0.69 
  -3   6  -1   23.91    0.43 
  -3   6  -1   23.78    0.64 
  -3   6  -1   22.98    0.77 
  -3   6  -1   23.00    0.93 
  -3   6  -1   24.01    0.44 
   3  -6   1   22.75    0.77 
  -4   6  -1  198.84    4.30 
  -4   6  -1  204.93    4.55 
  -4   6  -1  200.23    4.65 
  -4   6  -1  200.33    4.30 
  -4   6  -1  197.21    4.80 
   4  -6   1  195.15    4.59 
   4  -6   1  199.64    4.83 
  -5   6  -1   20.36    0.55 
  -5   6  -1   20.80    0.54 
  -5   6  -1   21.44    0.84 
  -5   6  -1   22.42    1.06 
  -5   6  -1   21.46    0.67 
   5  -6   1   21.63    0.93 
   5  -6   1   21.21    0.86 
  -6   6  -1    0.18    0.28 
  -6   6  -1    0.05    0.16 
  -6   6  -1    0.09    0.17 
  -6   6  -1    0.16    0.15 
  -6   6  -1    0.20    0.36 
   6  -6   1    0.14    0.10 
   6  -6   1   -0.01    0.05 
   6  -6   1    0.11    0.40 
   6  -6   1    0.07    0.25 
  -7   6  -1    1.23    0.22 
  -7   6  -1    1.02    0.35 
  -7   6  -1    0.94    0.19 
  -7   6  -1    1.20    0.19 
  -7   6  -1    1.26    0.45 
   7  -6   1    1.20    0.48 
   7  -6   1    1.16    0.31 
   7  -6   1    1.17    0.14 
   7  -6   1    1.15    0.15 
  -8   6  -1    6.68    0.43 
  -8   6  -1    7.20    0.41 
  -8   6  -1    6.78    0.82 
  -8   6  -1    6.45    0.61 
   8  -6   1    6.92    0.35 
   8  -6   1    6.36    0.75 
   8  -6   1    6.33    0.73 
   8  -6   1    6.89    0.34 
  -9   6  -1   -0.11    0.20 
  -9   6  -1    0.07    0.22 
  -9   6  -1    0.04    0.35 
  -9   6  -1   -0.04    0.24 
   9  -6   1    0.05    0.19 
   9  -6   1   -0.08    0.32 
   9  -6   1   -0.08    0.55 
 -10   6  -1    7.83    0.56 
 -10   6  -1    6.79    0.72 
 -10   6  -1    8.11    0.55 
  10  -6   1    5.96    0.94 
  10  -6   1    7.19    0.45 
  10  -6   1    6.68    0.94 
 -11   6  -1    0.17    0.33 
 -11   6  -1    0.04    0.24 
  11  -6   1   -0.06    0.34 
  11  -6   1    0.11    0.25 
  11  -6   1    0.25    0.72 
 -12   6  -1    3.17    0.37 
 -12   6  -1    4.30    0.49 
  12  -6   1    4.43    0.50 
  12  -6   1    4.61    0.95 
 -13   6  -1    0.61    0.42 
  13  -6   1    0.31    0.80 
  13  -6   1    0.77    0.33 
 -14   6  -1    6.67    0.77 
  14  -6   1    7.20    1.22 
  14  -6   1    6.56    0.64 
 -15   6  -1    5.75    0.64 
  15  -6   1    4.89    0.49 
  15  -6   1    6.02    1.21 
 -16   6  -1    0.14    0.50 
  16  -6   1   -0.12    0.91 
  16  -6   1    0.28    0.40 
 -17   6  -1   -0.12    0.48 
  17  -6   1   -0.13    0.93 
 -18   6  -1    0.07    0.53 
  18  -6   1    0.72    1.13 
 -19   6  -1    2.16    0.71 
  19  -6   1    2.65    1.23 
  19   5  -1    0.56    1.30 
  19   5  -1    0.30    0.60 
  19   5  -1   -0.23    0.61 
 -19  -5   1    0.85    0.63 
  18   5  -1    0.39    1.11 
  18   5  -1   -0.38    0.58 
  18   5  -1   -0.36    0.61 
 -18  -5   1   -0.08    0.57 
  17   5  -1    0.60    1.08 
  17   5  -1    0.18    0.55 
  17   5  -1   -0.07    0.55 
 -17  -5   1   -0.17    0.53 
  16   5  -1    1.55    0.60 
  16   5  -1    2.46    0.61 
  16   5  -1    2.81    1.20 
 -16  -5   1    2.41    0.62 
  15   5  -1    0.47    0.56 
  15   5  -1    0.05    0.49 
 -15  -5   1    0.32    0.56 
  14   5  -1    1.67    0.52 
  14   5  -1    0.98    0.55 
 -14  -5   1    1.54    0.50 
  13   5  -1    3.02    0.51 
  13   5  -1    2.39    0.51 
 -13  -5   1    3.05    0.52 
  12   5  -1    2.64    0.44 
  12   5  -1    2.20    0.44 
 -12  -5   1    2.62    0.45 
  11   5  -1    1.56    0.40 
  11   5  -1    1.08    0.40 
 -11  -5   1    1.30    0.39 
  10   5  -1    0.55    0.36 
  10   5  -1    0.50    0.38 
 -10  -5   1    0.35    0.32 
   9   5  -1    4.10    0.42 
   9   5  -1    5.45    0.82 
  -9  -5   1    4.14    0.40 
   8   5  -1   10.30    0.87 
   8   5  -1    9.33    0.58 
  -8  -5   1    9.85    0.79 
  -8  -5   1    9.65    0.53 
   7   5  -1    9.09    0.78 
   7   5  -1    8.69    0.47 
  -7  -5   1    8.75    0.46 
  -7  -5   1    8.75    0.72 
   6   5  -1    0.32    0.24 
   6   5  -1    0.15    0.22 
   6   5  -1    0.24    0.21 
  -6  -5   1    0.35    0.22 
  -6  -5   1    0.15    0.22 
   5   5  -1   58.00    1.19 
   5   5  -1   57.19    1.55 
   5   5  -1   58.72    1.21 
  -5  -5   1   57.63    1.15 
  -5  -5   1   57.64    1.19 
  -5  -5   1   57.14    1.11 
  -5  -5   1   57.72    1.53 
   4   5  -1   53.48    1.08 
   4   5  -1   53.19    1.44 
   4   5  -1   52.79    1.07 
  -4  -5   1   51.31    0.99 
  -4  -5   1   52.61    1.04 
  -4  -5   1   52.98    1.03 
  -4  -5   1   52.55    1.38 
   3   5  -1    2.62    0.51 
   3   5  -1    2.53    0.24 
   3   5  -1    2.07    0.28 
   3   5  -1    2.39    0.27 
  -3  -5   1    2.34    0.25 
  -3  -5   1    2.75    0.49 
  -3  -5   1    1.97    0.24 
  -3  -5   1    2.48    0.25 
   2   5  -1   23.65    0.55 
   2   5  -1   23.42    0.85 
   2   5  -1   23.24    0.55 
   2   5  -1   23.02    0.55 
  -2  -5   1   23.61    0.52 
  -2  -5   1   22.86    0.55 
  -2  -5   1   22.82    0.84 
  -2  -5   1   22.32    0.50 
   1   5  -1   28.26    0.53 
   1   5  -1   28.80    0.81 
   1   5  -1   28.36    0.57 
   1   5  -1   28.73    0.54 
  -1  -5   1   29.48    0.84 
  -1  -5   1   28.13    0.57 
   0   5  -1    0.66    0.14 
   0   5  -1    0.39    0.14 
   0  -5   1    0.71    0.14 
  -1   5  -1  276.63    7.03 
  -1   5  -1  274.25    6.68 
  -1   5  -1  272.54    6.97 
   1  -5   1  275.74    6.71 
  -2   5  -1    7.96    0.59 
  -2   5  -1    8.72    0.46 
  -2   5  -1    9.18    0.37 
   2  -5   1    8.42    0.44 
   2  -5   1    9.10    0.39 
  -3   5  -1    9.99    0.46 
  -3   5  -1   10.09    0.22 
  -3   5  -1    9.87    0.21 
  -3   5  -1   10.24    0.35 
  -3   5  -1   11.04    0.62 
   3  -5   1    9.76    0.46 
   3  -5   1   10.26    0.56 
  -4   5  -1    3.91    0.57 
  -4   5  -1    3.85    0.44 
  -4   5  -1    4.03    0.23 
  -4   5  -1    3.91    0.31 
  -4   5  -1    4.01    0.21 
   4  -5   1    3.43    0.42 
  -5   5  -1   58.05    1.64 
  -5   5  -1   56.51    1.27 
  -5   5  -1   57.90    1.38 
  -5   5  -1   57.05    1.16 
  -5   5  -1   55.77    1.18 
  -5   5  -1   58.06    1.48 
   5  -5   1   57.19    1.10 
   5  -5   1   57.22    1.59 
   5  -5   1   56.72    1.48 
  -6   5  -1    1.15    0.18 
  -6   5  -1    1.06    0.18 
  -6   5  -1    1.02    0.24 
  -6   5  -1    1.66    0.44 
  -6   5  -1    1.29    0.34 
  -6   5  -1    1.02    0.19 
   6  -5   1    1.25    0.28 
   6  -5   1    1.10    0.14 
   6  -5   1    1.41    0.45 
   6  -5   1    1.10    0.15 
  -7   5  -1    4.96    0.35 
  -7   5  -1    5.34    0.47 
  -7   5  -1    5.29    0.33 
  -7   5  -1    4.22    0.41 
   7  -5   1    5.11    0.28 
   7  -5   1    4.93    0.55 
   7  -5   1    5.13    0.61 
   7  -5   1    5.17    0.29 
  -8   5  -1    0.37    0.32 
  -8   5  -1    0.51    0.21 
  -8   5  -1    0.33    0.19 
  -8   5  -1    0.48    0.22 
   8  -5   1    0.43    0.28 
   8  -5   1    0.45    0.19 
   8  -5   1    0.35    0.53 
  -9   5  -1   23.36    0.95 
  -9   5  -1   23.23    0.75 
  -9   5  -1   24.37    0.74 
   9  -5   1   23.87    1.15 
   9  -5   1   24.24    0.71 
   9  -5   1   23.96    1.16 
 -10   5  -1    1.80    0.34 
 -10   5  -1    1.25    0.26 
  10  -5   1    1.58    0.67 
  10  -5   1    1.77    0.27 
  10  -5   1    1.16    0.36 
 -11   5  -1    6.62    0.53 
 -11   5  -1    6.44    0.72 
  11  -5   1    6.64    0.53 
  11  -5   1    6.39    0.91 
  11  -5   1    6.17    0.90 
 -12   5  -1    9.12    0.82 
 -12   5  -1    9.74    0.69 
  12  -5   1    9.38    0.58 
  12  -5   1    9.23    1.14 
 -13   5  -1   -0.19    0.40 
  13  -5   1    0.01    0.32 
  13  -5   1   -0.36    0.77 
 -14   5  -1    4.45    0.58 
  14  -5   1    4.56    1.11 
  14  -5   1    4.27    0.45 
 -15   5  -1    0.01    0.43 
  15  -5   1    0.36    0.38 
  15  -5   1   -0.13    0.98 
 -16   5  -1    0.01    0.46 
  16  -5   1    0.14    0.40 
  16  -5   1   -0.31    0.94 
 -17   5  -1    0.46    0.52 
  17  -5   1    0.25    1.10 
  17  -5   1   -0.02    0.42 
 -18   5  -1    3.44    0.70 
  18  -5   1    4.06    1.35 
 -19   5  -1    1.89    0.71 
  19  -5   1    2.39    1.24 
  19   4  -1    2.95    0.75 
  19   4  -1    3.58    1.44 
 -19  -4   1    3.02    0.79 
  18   4  -1    2.69    1.31 
  18   4  -1    2.05    0.64 
  18   4  -1    1.53    0.63 
 -18  -4   1    2.88    0.72 
  17   4  -1    2.52    0.60 
  17   4  -1    3.33    1.23 
  17   4  -1    1.77    0.63 
 -17  -4   1    2.93    0.66 
  16   4  -1    7.17    0.85 
  16   4  -1    7.20    1.39 
 -16  -4   1    7.52    0.88 
  15   4  -1   10.62    1.40 
  15   4  -1   10.04    0.88 
  15   4  -1   10.05    1.42 
 -15  -4   1   10.77    0.90 
  14   4  -1    0.23    0.45 
  14   4  -1    0.32    0.46 
 -14  -4   1    0.57    0.48 
  13   4  -1    1.12    0.43 
  13   4  -1    0.73    0.44 
 -13  -4   1    1.02    0.50 
  12   4  -1    1.71    0.40 
  12   4  -1    1.74    0.43 
 -12  -4   1    1.29    0.39 
  11   4  -1    0.57    0.34 
  11   4  -1    0.86    0.38 
 -11  -4   1    0.66    0.35 
  10   4  -1   30.65    1.44 
  10   4  -1   29.25    0.97 
 -10  -4   1   29.15    0.97 
   9   4  -1   -0.16    0.27 
   9   4  -1    0.15    0.31 
  -9  -4   1    0.00    0.25 
  -9  -4   1   -0.10    0.28 
   8   4  -1   21.63    1.12 
   8   4  -1   20.07    0.73 
  -8  -4   1   21.10    1.03 
  -8  -4   1   20.65    0.73 
   7   4  -1   38.30    1.31 
   7   4  -1   38.43    0.96 
  -7  -4   1   38.42    1.25 
  -7  -4   1   37.76    0.94 
   6   4  -1  100.01    2.56 
   6   4  -1   99.67    2.14 
   6   4  -1  101.78    2.18 
  -6  -4   1   98.82    2.14 
  -6  -4   1  100.64    2.54 
   5   4  -1    1.48    0.21 
   5   4  -1    1.55    0.23 
   5   4  -1    1.48    0.20 
  -5  -4   1    1.54    0.21 
  -5  -4   1    1.56    0.17 
  -5  -4   1    1.56    0.20 
   4   4  -1  237.79    5.79 
   4   4  -1  235.00    6.09 
   4   4  -1  240.77    5.85 
  -4  -4   1  240.14    5.81 
  -4  -4   1  234.31    5.74 
  -4  -4   1  237.31    6.13 
  -4  -4   1  236.57    5.73 
   3   4  -1   10.13    0.41 
   3   4  -1   10.87    0.64 
   3   4  -1   10.04    0.39 
  -3  -4   1   10.32    0.40 
  -3  -4   1   10.28    0.36 
  -3  -4   1    9.94    0.37 
  -3  -4   1   10.65    0.63 
   2   4  -1  216.13    4.86 
   2   4  -1  218.68    4.91 
   2   4  -1  215.59    4.86 
   2   4  -1  215.52    5.14 
  -2  -4   1  216.69    4.85 
  -2  -4   1  218.67    4.89 
  -2  -4   1  213.06    4.82 
  -2  -4   1  215.82    5.13 
   1   4  -1   42.27    0.69 
   1   4  -1   42.69    0.71 
   1   4  -1   42.90    0.91 
   1   4  -1   42.44    0.68 
  -1  -4   1   41.82    0.71 
  -1  -4   1   42.81    0.66 
  -1  -4   1   42.84    0.91 
   0   4  -1   20.77    0.54 
   0   4  -1   20.64    0.40 
   0  -4   1   20.78    0.41 
   0  -4   1   21.25    0.54 
  -1   4  -1   30.30    0.87 
  -1   4  -1   29.82    0.87 
  -1   4  -1   29.49    0.78 
   1  -4   1   28.99    0.85 
   1  -4   1   29.35    0.80 
  -2   4  -1   31.67    0.65 
  -2   4  -1   29.94    0.88 
  -2   4  -1   30.89    0.72 
   2  -4   1   31.41    0.66 
   2  -4   1   30.09    0.72 
  -3   4  -1    0.04    0.14 
  -3   4  -1   -0.01    0.25 
  -3   4  -1    0.21    0.20 
  -3   4  -1    0.15    0.09 
  -3   4  -1    0.10    0.08 
   3  -4   1    0.03    0.17 
   3  -4   1   -0.07    0.24 
  -4   4  -1    0.97    0.29 
  -4   4  -1    1.12    0.22 
  -4   4  -1    1.73    0.39 
  -4   4  -1    1.08    0.14 
  -4   4  -1    0.81    0.16 
  -4   4  -1    1.12    0.15 
   4  -4   1    0.84    0.24 
   4  -4   1    1.33    0.37 
   4  -4   1    1.26    0.15 
  -5   4  -1    6.87    0.74 
  -5   4  -1    6.84    0.46 
  -5   4  -1    7.13    0.37 
  -5   4  -1    7.34    0.32 
  -5   4  -1    6.46    0.53 
  -5   4  -1    7.20    0.30 
   5  -4   1    6.26    0.63 
   5  -4   1    7.56    0.27 
   5  -4   1    7.05    0.27 
   5  -4   1    6.41    0.54 
  -6   4  -1    9.23    0.38 
  -6   4  -1   10.23    0.84 
  -6   4  -1    8.86    0.41 
  -6   4  -1   10.04    0.53 
   6  -4   1    9.40    0.35 
   6  -4   1    9.51    0.68 
   6  -4   1    9.49    0.36 
   6  -4   1   10.06    0.76 
  -7   4  -1    7.68    0.82 
  -7   4  -1    7.34    0.39 
  -7   4  -1    7.12    0.42 
  -7   4  -1    7.37    0.53 
   7  -4   1    7.19    0.65 
   7  -4   1    7.42    0.70 
   7  -4   1    7.19    0.35 
   7  -4   1    6.90    0.36 
  -8   4  -1   23.91    0.66 
  -8   4  -1   22.62    0.71 
  -8   4  -1   23.48    0.88 
   8  -4   1   23.36    1.09 
   8  -4   1   24.01    1.12 
   8  -4   1   22.87    0.65 
  -9   4  -1   55.20    1.29 
  -9   4  -1   53.80    1.33 
  -9   4  -1   56.25    1.58 
   9  -4   1   54.67    1.77 
   9  -4   1   53.48    1.25 
   9  -4   1   55.46    1.78 
 -10   4  -1   49.75    1.53 
 -10   4  -1   48.55    1.26 
  10  -4   1   49.24    1.69 
  10  -4   1   49.26    1.20 
  10  -4   1   49.83    1.78 
  10  -4   1   47.90    1.74 
 -11   4  -1   35.82    1.28 
 -11   4  -1   34.87    1.05 
  11  -4   1   35.99    1.52 
  11  -4   1   35.68    1.56 
  11  -4   1   35.26    1.51 
  11  -4   1   36.74    1.01 
 -12   4  -1    1.43    0.42 
  12  -4   1    0.75    0.38 
  12  -4   1    1.45    0.34 
  12  -4   1    1.52    0.88 
 -13   4  -1    1.14    0.44 
  13  -4   1    1.31    0.35 
  13  -4   1    0.59    0.42 
  13  -4   1    1.11    0.84 
 -14   4  -1    2.89    0.53 
  14  -4   1    3.05    0.99 
  14  -4   1    2.78    0.43 
  14  -4   1    2.22    0.46 
 -15   4  -1    7.66    0.75 
  15  -4   1    7.72    0.71 
  15  -4   1    7.04    1.27 
 -16   4  -1    1.14    0.51 
  16  -4   1    0.98    0.40 
  16  -4   1    1.28    1.01 
 -17   4  -1    0.13    0.50 
  17  -4   1    0.37    1.13 
  17  -4   1    0.28    0.44 
 -18   4  -1    5.40    0.77 
  18  -4   1    6.89    1.55 
  18  -4   1    4.97    0.62 
 -19   4  -1    0.27    0.58 
  19  -4   1    0.57    1.18 
  19   3  -1   -0.41    0.58 
  19   3  -1    0.19    1.19 
  19   3  -1    0.48    0.59 
 -19  -3   1    0.13    0.69 
  18   3  -1   -0.77    0.59 
  18   3  -1   -0.16    1.11 
  18   3  -1   -0.16    0.60 
 -18  -3   1    0.03    0.58 
  17   3  -1    0.01    1.03 
  17   3  -1   -0.35    0.53 
  17   3  -1    0.27    0.53 
 -17  -3   1    0.27    0.57 
  16   3  -1    1.36    0.53 
  16   3  -1    0.72    0.54 
  16   3  -1    1.09    1.05 
 -16  -3   1    1.04    0.56 
  15   3  -1   -0.39    0.93 
  15   3  -1    0.06    0.53 
  15   3  -1    0.13    0.46 
 -15  -3   1    0.32    0.53 
  14   3  -1    2.20    0.52 
  14   3  -1    1.60    0.52 
  14   3  -1    2.90    1.02 
 -14  -3   1    1.83    0.52 
  13   3  -1    0.58    0.45 
  13   3  -1    0.99    0.88 
  13   3  -1    0.52    0.43 
 -13  -3   1    0.72    0.43 
  12   3  -1    0.06    0.36 
  12   3  -1    0.25    0.37 
 -12  -3   1   -0.29    0.41 
  11   3  -1   15.72    0.78 
  11   3  -1   16.58    1.21 
 -11  -3   1   15.78    0.78 
  10   3  -1    0.01    0.34 
  10   3  -1    0.12    0.32 
 -10  -3   1   -0.09    0.31 
   9   3  -1   13.82    0.66 
   9   3  -1   14.94    1.02 
  -9  -3   1   15.95    0.96 
  -9  -3   1   13.78    0.66 
   8   3  -1    9.98    0.53 
   8   3  -1   10.94    0.84 
  -8  -3   1   10.12    0.53 
  -8  -3   1   11.20    0.78 
   7   3  -1   40.47    0.96 
   7   3  -1   40.57    1.33 
  -7  -3   1   40.54    1.27 
  -7  -3   1   40.62    0.98 
   6   3  -1   12.24    0.49 
   6   3  -1   11.98    0.49 
   6   3  -1   12.71    0.79 
  -6  -3   1   12.81    0.73 
  -6  -3   1   12.81    0.57 
  -6  -3   1   12.26    0.53 
   5   3  -1   30.92    0.94 
   5   3  -1   31.24    0.65 
   5   3  -1   29.96    0.64 
  -5  -3   1   30.41    0.65 
  -5  -3   1   30.67    0.89 
  -5  -3   1   30.47    0.63 
   4   3  -1    4.75    0.29 
   4   3  -1    4.93    0.30 
   4   3  -1    4.83    0.52 
  -4  -3   1    4.77    0.26 
  -4  -3   1    4.37    0.45 
  -4  -3   1    4.60    0.28 
   3   3  -1    9.84    0.33 
   3   3  -1   10.10    0.54 
   3   3  -1    9.51    0.32 
  -3  -3   1    9.82    0.29 
  -3  -3   1    9.63    0.34 
  -3  -3   1   10.04    0.51 
  -3  -3   1    9.73    0.30 
   2   3  -1   23.44    0.55 
   2   3  -1   24.09    0.53 
   2   3  -1   24.10    0.74 
   2   3  -1   23.99    0.55 
  -2  -3   1   23.53    0.53 
  -2  -3   1   23.40    0.54 
  -2  -3   1   24.74    0.74 
  -2  -3   1   23.89    0.53 
   1   3  -1   52.76    1.03 
   1   3  -1   49.56    1.01 
   1   3  -1   58.53    1.05 
   1   3  -1   57.93    1.23 
  -1  -3   1   59.93    1.04 
  -1  -3   1   58.71    1.23 
  -1  -3   1   58.52    1.06 
   0   3  -1  192.54    5.07 
   0  -3   1  245.52    5.41 
  -1   3  -1    0.36    0.10 
  -1   3  -1    0.26    0.14 
  -1   3  -1    0.26    0.07 
   1  -3   1    0.49    0.11 
   1  -3   1    0.36    0.15 
  -2   3  -1   21.63    0.52 
  -2   3  -1   20.77    0.70 
  -2   3  -1   20.26    0.55 
  -2   3  -1   21.99    0.40 
  -2   3  -1   21.18    0.40 
   2  -3   1   21.09    0.57 
   2  -3   1   19.95    0.68 
   2  -3   1   20.95    0.52 
  -3   3  -1   19.23    0.35 
  -3   3  -1   19.24    0.35 
  -3   3  -1   18.96    0.63 
  -3   3  -1   19.09    0.45 
  -3   3  -1   19.61    0.43 
  -3   3  -1   18.94    0.51 
   3  -3   1   19.59    0.32 
   3  -3   1   18.72    0.60 
   3  -3   1   18.56    0.51 
  -4   3  -1  140.94    3.35 
  -4   3  -1  141.93    3.09 
  -4   3  -1  144.14    3.27 
  -4   3  -1  139.72    3.01 
  -4   3  -1  139.58    3.01 
  -4   3  -1  141.87    3.01 
  -4   3  -1  139.04    3.12 
   4  -3   1  140.53    3.25 
   4  -3   1  141.66    3.35 
   4  -3   1  142.14    3.00 
   4  -3   1  140.59    2.98 
  -5   3  -1   83.22    2.15 
  -5   3  -1   81.94    1.78 
  -5   3  -1   83.44    1.75 
  -5   3  -1   82.30    1.92 
   5  -3   1   81.72    1.72 
   5  -3   1   83.29    2.12 
   5  -3   1   81.80    2.04 
   5  -3   1   84.02    1.76 
  -6   3  -1   27.59    1.02 
  -6   3  -1   27.01    0.63 
  -6   3  -1   27.15    0.66 
  -6   3  -1   27.45    0.80 
   6  -3   1   27.27    0.62 
   6  -3   1   27.16    0.95 
   6  -3   1   27.73    1.02 
   6  -3   1   27.39    0.87 
   6  -3   1   27.73    0.63 
  -7   3  -1    0.19    0.19 
  -7   3  -1    0.13    0.19 
  -7   3  -1    0.23    0.16 
   7  -3   1    0.17    0.17 
   7  -3   1    0.22    0.16 
   7  -3   1    0.18    0.20 
   7  -3   1    0.21    0.42 
   7  -3   1    0.27    0.25 
  -8   3  -1   29.15    0.72 
  -8   3  -1   27.60    0.91 
  -8   3  -1   28.07    0.73 
   8  -3   1   27.08    1.10 
   8  -3   1   27.08    1.00 
   8  -3   1   27.70    0.66 
   8  -3   1   27.10    1.06 
  -9   3  -1   46.63    1.40 
  -9   3  -1   48.28    1.18 
  -9   3  -1   45.14    1.16 
   9  -3   1   45.00    1.56 
   9  -3   1   46.20    1.11 
   9  -3   1   44.97    1.50 
   9  -3   1   45.82    1.57 
 -10   3  -1    4.93    0.64 
  10  -3   1    3.95    0.39 
  10  -3   1    3.87    0.43 
 -11   3  -1    0.47    0.26 
 -11   3  -1    1.09    0.38 
  11  -3   1    0.67    0.36 
  11  -3   1    0.56    0.30 
  11  -3   1    0.50    0.70 
  11  -3   1    0.63    0.38 
 -12   3  -1    4.05    0.47 
 -12   3  -1    4.48    0.66 
  12  -3   1    4.22    0.42 
  12  -3   1    3.68    0.44 
  12  -3   1    5.19    0.95 
  12  -3   1    3.71    0.59 
 -13   3  -1   -0.17    0.39 
  13  -3   1   -0.02    0.37 
  13  -3   1    0.12    0.33 
  13  -3   1    0.07    0.77 
 -14   3  -1    0.80    0.49 
  14  -3   1    0.64    0.46 
  14  -3   1    0.85    0.38 
  14  -3   1    0.80    0.90 
 -15   3  -1    0.23    0.44 
  15  -3   1    0.08    0.91 
  15  -3   1    0.20    0.41 
  15  -3   1   -0.31    0.45 
 -16   3  -1    3.86    0.62 
  16  -3   1    4.16    1.21 
  16  -3   1    2.65    0.63 
  16  -3   1    3.99    0.57 
 -17   3  -1    5.51    0.68 
  17  -3   1    5.45    1.29 
  17  -3   1    4.78    0.57 
 -18   3  -1    2.43    0.69 
  18  -3   1    2.30    1.19 
  18  -3   1    2.22    0.54 
 -19   3  -1    0.28    0.58 
  19  -3   1    0.03    0.50 
  19  -3   1    0.57    1.14 
  19   2  -1    0.56    0.62 
  19   2  -1    1.57    0.66 
  19   2  -1    1.88    1.29 
 -19  -2   1    1.45    0.69 
  18   2  -1    0.44    1.13 
  18   2  -1   -0.01    0.55 
  18   2  -1    0.73    0.54 
 -18  -2   1    0.79    0.67 
  17   2  -1    0.24    0.56 
  17   2  -1   -0.12    0.53 
  17   2  -1   -0.32    1.04 
 -17  -2   1    0.16    0.54 
  16   2  -1   -0.01    0.48 
  16   2  -1    0.07    0.98 
  16   2  -1   -0.14    0.55 
 -16  -2   1    0.07    0.52 
  15   2  -1    0.01    0.49 
  15   2  -1    0.40    0.99 
  15   2  -1    0.42    0.52 
 -15  -2   1    0.27    0.51 
  14   2  -1    0.11    0.43 
  14   2  -1    0.28    0.43 
  14   2  -1    0.03    0.91 
 -14  -2   1   -0.19    0.44 
  13   2  -1   10.33    0.79 
  13   2  -1   10.24    1.12 
  13   2  -1   10.79    1.17 
 -13  -2   1    9.47    0.70 
  12   2  -1    0.96    0.79 
  12   2  -1    0.70    0.40 
  12   2  -1    0.89    0.39 
 -12  -2   1    0.87    0.39 
  11   2  -1    3.68    0.47 
  11   2  -1    2.93    0.45 
 -11  -2   1    3.36    0.48 
  10   2  -1    0.00    0.30 
  10   2  -1    0.01    0.32 
 -10  -2   1    0.23    0.32 
   9   2  -1    0.18    0.29 
   9   2  -1    0.06    0.30 
  -9  -2   1    0.26    0.30 
  -9  -2   1    0.11    0.24 
   8   2  -1   42.04    1.12 
   8   2  -1   42.58    1.55 
  -8  -2   1   43.16    1.15 
  -8  -2   1   43.02    1.46 
   7   2  -1   96.83    2.05 
   7   2  -1   93.44    2.41 
  -7  -2   1   95.41    2.39 
  -7  -2   1   94.88    2.04 
   6   2  -1   57.33    1.71 
   6   2  -1   57.58    1.37 
   6   2  -1   61.09    1.41 
  -6  -2   1   58.71    1.69 
  -6  -2   1   58.88    1.40 
  -6  -2   1   59.04    1.36 
   5   2  -1   30.36    0.76 
   5   2  -1   30.86    0.77 
   5   2  -1   30.11    1.06 
  -5  -2   1   31.21    0.75 
  -5  -2   1   30.23    0.78 
  -5  -2   1   30.33    1.03 
   4   2  -1    3.65    0.23 
   4   2  -1    3.96    0.21 
   4   2  -1    3.96    0.21 
  -4  -2   1    4.03    0.19 
  -4  -2   1    4.36    0.42 
  -4  -2   1    3.93    0.21 
   3   2  -1  256.79    6.00 
   3   2  -1  251.27    6.36 
   3   2  -1  249.60    5.94 
  -3  -2   1  250.71    5.90 
  -3  -2   1  248.82    6.28 
  -3  -2   1  252.16    5.90 
   2   2  -1   54.06    1.11 
   2   2  -1   57.97    1.30 
   2   2  -1   60.68    1.14 
  -2  -2   1   59.52    1.30 
  -2  -2   1   62.16    1.14 
  -2  -2   1   61.77    1.13 
  -2  -2   1   58.07    1.11 
   1   2  -1    0.03    0.05 
   1   2  -1   -0.09    0.06 
   1   2  -1    0.05    0.07 
   1   2  -1   -0.01    0.04 
  -1  -2   1    0.00    0.05 
  -1  -2   1    0.02    0.05 
  -1  -2   1   -0.04    0.07 
  -1  -2   1    0.05    0.06 
  -1   2  -1    0.06    0.09 
  -1   2  -1   -0.02    0.04 
  -1   2  -1    0.03    0.03 
   1  -2   1    0.18    0.07 
  -2   2  -1    7.19    0.42 
  -2   2  -1    6.65    0.17 
  -2   2  -1    5.38    0.20 
   2  -2   1    7.52    0.24 
   2  -2   1    6.95    0.27 
   2  -2   1    7.17    0.15 
  -3   2  -1   32.67    0.83 
  -3   2  -1   32.67    0.55 
  -3   2  -1   31.94    0.62 
  -3   2  -1   32.03    0.69 
  -3   2  -1   33.13    0.61 
  -3   2  -1   32.50    0.56 
   3  -2   1   32.87    0.55 
   3  -2   1   32.34    0.65 
   3  -2   1   32.17    0.70 
   3  -2   1   32.69    0.54 
   3  -2   1   31.99    0.78 
  -4   2  -1   29.82    0.73 
  -4   2  -1   28.38    1.00 
  -4   2  -1   27.92    0.82 
  -4   2  -1   29.19    0.73 
   4  -2   1   28.35    0.93 
   4  -2   1   27.68    0.98 
   4  -2   1   29.92    0.73 
   4  -2   1   28.33    0.85 
   4  -2   1   29.66    0.72 
  -5   2  -1    3.06    0.57 
  -5   2  -1    2.51    0.31 
  -5   2  -1    2.16    0.28 
  -5   2  -1    3.23    0.39 
   5  -2   1    3.43    0.55 
   5  -2   1    2.68    0.24 
   5  -2   1    2.82    0.46 
   5  -2   1    2.39    0.28 
   5  -2   1    3.17    0.45 
  -6   2  -1   10.39    0.46 
  -6   2  -1   11.33    0.57 
  -6   2  -1   10.74    0.43 
   6  -2   1   11.33    0.74 
   6  -2   1   10.44    0.43 
   6  -2   1   10.94    0.43 
   6  -2   1   11.18    0.65 
   6  -2   1   10.96    0.73 
  -7   2  -1    7.50    0.39 
  -7   2  -1    7.43    0.43 
  -7   2  -1    7.72    0.58 
   7  -2   1    7.56    0.39 
   7  -2   1    7.54    0.40 
   7  -2   1    7.71    0.67 
   7  -2   1    7.31    0.70 
   7  -2   1    7.34    0.42 
   7  -2   1    7.33    0.60 
  -8   2  -1    4.45    0.47 
  -8   2  -1    4.83    0.40 
  -8   2  -1    4.58    0.38 
   8  -2   1    4.70    0.63 
   8  -2   1    4.81    0.63 
   8  -2   1    4.52    0.35 
  -9   2  -1   22.72    0.92 
  -9   2  -1   23.24    0.80 
   9  -2   1   22.64    1.10 
   9  -2   1   22.24    1.09 
   9  -2   1   23.49    0.72 
   9  -2   1   23.16    1.08 
 -10   2  -1   11.42    0.74 
 -10   2  -1   10.74    0.59 
  10  -2   1   11.03    0.93 
  10  -2   1   11.22    0.93 
  10  -2   1   11.85    1.02 
  10  -2   1   11.13    0.59 
 -11   2  -1   77.00    2.19 
 -11   2  -1   74.21    1.84 
  11  -2   1   75.10    2.31 
  11  -2   1   77.02    1.82 
  11  -2   1   75.65    2.36 
  11  -2   1   74.77    2.43 
 -12   2  -1   18.01    1.10 
 -12   2  -1   17.75    0.83 
  12  -2   1   18.36    1.30 
  12  -2   1   17.76    0.78 
  12  -2   1   18.08    1.31 
  12  -2   1   18.28    1.28 
 -13   2  -1    4.59    0.51 
  13  -2   1    3.46    0.50 
  13  -2   1    4.50    0.44 
  13  -2   1    5.53    1.01 
 -14   2  -1    5.14    0.55 
  14  -2   1    4.09    0.55 
  14  -2   1    5.98    1.10 
  14  -2   1    5.50    0.53 
 -15   2  -1    3.28    0.58 
  15  -2   1    2.72    0.45 
  15  -2   1    2.40    0.53 
  15  -2   1    3.70    1.15 
 -16   2  -1    3.71    0.59 
  16  -2   1    4.59    1.21 
  16  -2   1    3.89    0.57 
 -17   2  -1    2.28    0.59 
  17  -2   1    1.59    0.53 
  17  -2   1    2.76    1.17 
  17  -2   1    2.22    0.50 
 -18   2  -1    5.13    0.70 
  18  -2   1    5.12    0.63 
  18  -2   1    6.14    1.39 
 -19   2  -1    2.61    0.73 
  19  -2   1    3.36    1.30 
  19  -2   1    2.79    0.56 
 -20   2  -1    0.97    0.66 
  20  -2   1    1.31    1.36 
  20  -2   1    1.31    0.59 
  19   1  -1   -0.10    0.62 
  19   1  -1    0.21    1.20 
 -19  -1   1   -0.29    0.62 
  18   1  -1    0.91    0.62 
  18   1  -1    1.70    0.58 
  18   1  -1    2.27    1.30 
 -18  -1   1    1.88    0.67 
  17   1  -1    4.29    1.26 
  17   1  -1    4.12    0.66 
 -17  -1   1    3.90    0.66 
  16   1  -1    0.58    1.05 
  16   1  -1    0.43    0.47 
  16   1  -1    0.23    0.51 
 -16  -1   1    0.54    0.59 
  15   1  -1    0.57    0.55 
  15   1  -1    1.14    1.02 
  15   1  -1    0.38    0.51 
 -15  -1   1    0.45    0.51 
  14   1  -1    0.96    0.94 
  14   1  -1    0.21    0.45 
  14   1  -1    0.52    0.44 
 -14  -1   1    0.59    0.48 
  13   1  -1    0.07    0.37 
  13   1  -1   -0.03    0.83 
  13   1  -1    0.13    0.40 
 -13  -1   1    0.05    0.41 
  12   1  -1   10.19    1.09 
  12   1  -1   10.08    1.07 
  12   1  -1    9.93    0.66 
 -12  -1   1    9.73    0.67 
  11   1  -1    0.79    0.36 
  11   1  -1    0.96    0.71 
  11   1  -1    1.10    0.36 
 -11  -1   1    0.81    0.35 
  10   1  -1   39.46    1.13 
  10   1  -1   39.93    1.62 
  10   1  -1   41.84    1.63 
 -10  -1   1   40.54    1.20 
 -10  -1   1   41.01    1.49 
   9   1  -1   51.15    1.68 
   9   1  -1   53.00    1.28 
   9   1  -1   52.17    1.74 
  -9  -1   1   53.44    1.66 
  -9  -1   1   52.87    1.30 
   8   1  -1   28.17    0.82 
   8   1  -1   29.00    1.20 
  -8  -1   1   28.64    0.84 
  -8  -1   1   28.58    1.10 
   7   1  -1   33.48    0.87 
   7   1  -1   33.17    1.21 
  -7  -1   1   33.15    1.14 
  -7  -1   1   32.39    0.88 
   6   1  -1   84.02    1.80 
   6   1  -1   85.24    1.81 
   6   1  -1   84.71    2.15 
  -6  -1   1   86.44    2.13 
  -6  -1   1   85.65    1.79 
  -6  -1   1   83.22    1.80 
   5   1  -1   17.21    0.61 
   5   1  -1   18.74    0.62 
   5   1  -1   18.16    0.88 
  -5  -1   1   19.13    0.61 
  -5  -1   1   17.69    0.82 
  -5  -1   1   18.06    0.62 
   4   1  -1   53.18    1.10 
   4   1  -1   54.17    1.12 
   4   1  -1   51.63    1.34 
  -4  -1   1   54.23    1.10 
  -4  -1   1   53.03    1.33 
  -4  -1   1   53.67    1.12 
   3   1  -1    8.80    0.45 
   3   1  -1    9.42    0.30 
   3   1  -1    9.09    0.30 
  -3  -1   1    9.26    0.44 
  -3  -1   1    9.27    0.29 
  -3  -1   1    9.05    0.30 
   2   1  -1   30.22    0.75 
   2   1  -1   29.45    0.60 
  -2  -1   1   29.32    0.61 
   1   1  -1   -0.01    0.02 
  -1  -1   1   -0.02    0.02 
  -1  -1   1    0.02    0.02 
   0   1  -1    0.00    0.01 
   0   1  -1    0.01    0.01 
   0  -1   1    0.01    0.01 
  -1   1  -1    0.00    0.03 
  -1   1  -1   -0.02    0.01 
  -1   1  -1    0.01    0.01 
   1  -1   1   -0.02    0.01 
   1  -1   1    0.01    0.02 
  -2   1  -1   -0.02    0.01 
  -2   1  -1    0.02    0.02 
  -2   1  -1    0.00    0.04 
  -3   1  -1   12.86    0.32 
  -3   1  -1   13.04    0.33 
  -3   1  -1   10.66    0.35 
  -3   1  -1   13.99    0.54 
  -3   1  -1   10.64    0.29 
   3  -1   1   14.75    0.55 
   3  -1   1   13.29    0.33 
   3  -1   1   13.54    0.41 
   3  -1   1   12.93    0.31 
  -4   1  -1  137.11    3.33 
  -4   1  -1  140.41    3.35 
  -4   1  -1  134.92    3.42 
   4  -1   1  142.29    3.37 
   4  -1   1  136.71    3.58 
   4  -1   1  139.46    3.33 
   4  -1   1  133.34    3.43 
  -5   1  -1    0.79    0.17 
  -5   1  -1    0.85    0.15 
  -5   1  -1    0.87    0.14 
   5  -1   1    1.00    0.23 
   5  -1   1    0.89    0.17 
   5  -1   1    0.92    0.16 
   5  -1   1    0.91    0.17 
   5  -1   1    0.94    0.15 
  -6   1  -1    0.92    0.23 
  -6   1  -1    0.87    0.23 
  -6   1  -1    0.65    0.20 
   6  -1   1    1.04    0.22 
   6  -1   1    0.86    0.21 
   6  -1   1    0.78    0.22 
   6  -1   1    0.89    0.22 
   6  -1   1    0.80    0.31 
  -7   1  -1    0.59    0.16 
  -7   1  -1    0.62    0.24 
  -7   1  -1    0.56    0.20 
   7  -1   1    0.54    0.21 
   7  -1   1    0.62    0.25 
   7  -1   1    0.60    0.22 
   7  -1   1    0.54    0.20 
   7  -1   1    0.64    0.21 
  -8   1  -1    4.09    0.53 
  -8   1  -1    3.80    0.32 
  -8   1  -1    4.40    0.32 
   8  -1   1    3.56    0.38 
   8  -1   1    3.32    0.32 
   8  -1   1    4.27    0.62 
   8  -1   1    3.76    0.29 
  -9   1  -1    5.10    0.49 
  -9   1  -1    4.95    0.53 
   9  -1   1    5.39    0.45 
   9  -1   1    5.60    0.65 
   9  -1   1    5.51    0.71 
   9  -1   1    5.04    0.71 
 -10   1  -1    1.06    0.24 
 -10   1  -1    0.96    0.29 
  10  -1   1    0.94    0.34 
  10  -1   1    1.05    0.28 
  10  -1   1    1.05    0.61 
  10  -1   1    1.12    0.27 
 -11   1  -1    0.93    0.33 
 -11   1  -1    0.76    0.27 
  11  -1   1    0.92    0.29 
  11  -1   1    0.93    0.34 
  11  -1   1    0.86    0.36 
  11  -1   1    0.76    0.63 
 -12   1  -1    0.28    0.34 
 -12   1  -1    0.35    0.32 
  12  -1   1   -0.04    0.69 
  12  -1   1    0.30    0.48 
  12  -1   1    0.39    0.34 
  12  -1   1    0.37    0.35 
 -13   1  -1    0.28    0.41 
  13  -1   1    0.28    0.35 
  13  -1   1    0.58    0.78 
  13  -1   1    0.40    0.34 
 -14   1  -1    1.83    0.45 
  14  -1   1    2.45    0.94 
  14  -1   1    2.20    0.46 
  14  -1   1    1.76    0.48 
 -15   1  -1    0.00    0.43 
  15  -1   1    0.40    1.00 
  15  -1   1    0.15    0.40 
  15  -1   1    0.02    0.42 
 -16   1  -1    2.98    0.58 
  16  -1   1    3.01    0.55 
  16  -1   1    3.19    1.14 
 -17   1  -1   16.41    1.02 
  17  -1   1   17.58    1.64 
  17  -1   1   15.40    1.50 
  17  -1   1   17.10    0.94 
 -18   1  -1    3.05    0.65 
  18  -1   1    4.19    1.37 
  18  -1   1    3.16    0.55 
  18  -1   1    1.94    0.62 
 -19   1  -1    1.21    0.63 
  19  -1   1    1.53    0.59 
  19  -1   1    1.26    1.17 
 -20   1  -1    0.60    0.63 
  20  -1   1    0.06    1.17 
  20  -1   1    0.22    0.52 
  20  -1   1   -0.64    0.59 
  19   0  -1    0.03    0.58 
  19   0  -1    1.53    1.27 
  19   0  -1    0.79    0.61 
 -19   0   1    0.58    0.63 
  18   0  -1   -0.70    0.55 
  18   0  -1    0.09    0.50 
  18   0  -1    0.06    1.13 
 -18   0   1   -0.19    0.63 
  17   0  -1    4.10    0.66 
  17   0  -1    4.15    1.29 
 -17   0   1    4.24    0.70 
  16   0  -1    4.89    0.65 
  16   0  -1    6.06    0.63 
  16   0  -1    7.95    1.36 
 -16   0   1    6.46    0.72 
  15   0  -1    0.55    0.98 
  15   0  -1    0.57    0.44 
  15   0  -1    0.35    0.52 
 -15   0   1    0.40    0.49 
  14   0  -1    2.92    0.53 
  14   0  -1    3.51    0.53 
  14   0  -1    4.00    1.09 
 -14   0   1    3.11    0.57 
  13   0  -1   -0.03    0.36 
  13   0  -1    0.01    0.39 
  13   0  -1    0.13    0.82 
 -13   0   1   -0.29    0.43 
  12   0  -1    7.80    0.62 
  12   0  -1    8.03    1.15 
  12   0  -1    7.75    1.05 
 -12   0   1    8.14    0.64 
  11   0  -1   18.02    1.26 
  11   0  -1   18.26    1.21 
  11   0  -1   18.26    0.78 
 -11   0   1   17.65    0.80 
  10   0  -1    6.49    0.89 
  10   0  -1    6.70    0.53 
  10   0  -1    6.95    0.86 
 -10   0   1    6.50    0.72 
 -10   0   1    7.04    0.61 
   9   0  -1    4.69    0.75 
   9   0  -1    4.73    0.74 
   9   0  -1    4.42    0.44 
  -9   0   1    4.10    0.37 
  -9   0   1    4.11    0.60 
   8   0  -1    1.11    0.31 
   8   0  -1    1.82    0.62 
   8   0  -1    1.33    0.29 
  -8   0   1    1.04    0.26 
  -8   0   1    1.20    0.30 
   7   0  -1   54.98    1.68 
   7   0  -1   55.90    1.66 
   7   0  -1   55.52    1.29 
  -7   0   1   56.16    1.34 
  -7   0   1   59.69    1.34 
  -7   0   1   56.69    1.60 
   6   0  -1   19.98    0.62 
   6   0  -1   19.35    0.92 
   6   0  -1   20.40    0.65 
   6   0  -1   19.68    0.91 
  -6   0   1   19.65    0.64 
  -6   0   1   19.49    0.83 
  -6   0   1   20.20    0.61 
   5   0  -1   30.73    0.78 
   5   0  -1   31.04    1.08 
   5   0  -1   30.71    1.05 
   5   0  -1   31.64    0.79 
  -5   0   1   31.79    1.02 
  -5   0   1   30.87    0.82 
  -5   0   1   31.54    0.77 
   4   0  -1   72.97    1.29 
   4   0  -1   70.02    1.52 
   4   0  -1   71.40    1.26 
   4   0  -1   69.56    1.49 
  -4   0   1   72.34    1.26 
  -4   0   1   70.39    1.46 
  -4   0   1   71.57    1.28 
   3   0  -1    5.61    0.42 
   3   0  -1    5.11    0.25 
   3   0  -1    4.95    0.25 
   3   0  -1    5.45    0.42 
  -3   0   1    4.98    0.29 
  -3   0   1    5.30    0.24 
  -3   0   1    5.38    0.38 
   2   0  -1  187.97    4.62 
   2   0  -1  180.48    4.46 
   2   0  -1  192.55    4.08 
  -2   0   1  193.38    4.10 
   1   0  -1   -0.01    0.04 
   1   0  -1    0.01    0.02 
   1   0  -1   -0.04    0.02 
  -1   0   1    0.00    0.02 
  -1   0   1   -0.01    0.04 
   0   0  -1    0.00    0.01 
   0   0  -1   -0.02    0.01 
   0   0   1    0.02    0.01 
   0   0   1    0.00    0.01 
  -1   0  -1    0.01    0.01 
  -1   0  -1   -0.02    0.02 
  -1   0  -1    0.00    0.01 
   1   0   1    0.01    0.01 
   1   0   1    0.00    0.01 
   1   0   1   -0.01    0.01 
  -2   0  -1    0.03    0.03 
  -2   0  -1   -0.01    0.01 
  -2   0  -1    0.01    0.02 
   2   0   1   -0.01    0.03 
   2   0   1   -0.01    0.03 
  -3   0  -1   96.55    1.80 
   3   0   1   95.36    1.78 
   3   0   1   85.45    1.72 
   3   0   1   86.06    1.73 
   3   0   1   91.60    1.86 
  -4   0  -1   14.34    0.46 
  -4   0  -1   15.15    0.59 
  -4   0  -1   13.76    0.47 
   4   0   1   13.86    0.46 
   4   0   1   14.94    0.47 
   4   0   1   15.69    0.64 
   4   0   1   14.07    0.47 
  -5   0  -1   62.65    1.17 
  -5   0  -1   60.26    1.33 
  -5   0  -1   62.48    1.20 
   5   0   1   63.61    1.20 
   5   0   1   62.16    1.17 
   5   0   1   60.75    1.36 
  -6   0  -1  154.89    3.53 
  -6   0  -1  160.34    3.56 
  -6   0  -1  159.10    3.78 
   6   0   1  154.10    3.75 
   6   0   1  153.01    3.47 
   6   0   1  161.30    3.59 
  -7   0  -1    1.19    0.21 
  -7   0  -1    1.34    0.25 
  -7   0  -1    1.39    0.23 
   7   0   1    1.52    0.24 
   7   0   1    1.28    0.25 
   7   0   1    1.54    0.24 
  -8   0  -1    0.11    0.24 
  -8   0  -1    0.08    0.19 
  -8   0  -1    0.19    0.24 
   8   0   1    0.29    0.25 
   8   0   1    0.21    0.23 
  -9   0  -1    9.73    0.71 
  -9   0  -1    8.98    0.51 
   9   0   1    9.90    0.81 
   9   0   1    8.59    0.47 
 -10   0  -1    6.06    0.70 
 -10   0  -1    6.06    0.51 
  10   0   1    6.70    0.54 
  10   0   1    6.43    0.74 
 -11   0  -1    7.49    0.80 
 -11   0  -1    7.76    0.57 
  11   0   1    8.30    0.87 
  11   0   1    7.62    0.91 
  11   0   1    7.83    0.61 
 -12   0  -1    5.13    0.51 
  12   0   1    4.50    0.43 
  12   0   1    5.04    0.91 
  12   0   1    3.95    0.45 
 -13   0  -1    0.17    0.36 
  13   0   1    0.34    0.38 
  13   0   1    0.21    0.34 
  13   0   1    0.44    0.73 
 -14   0  -1    0.03    0.42 
  14   0   1    0.14    0.37 
  14   0   1    0.28    0.82 
  14   0   1    0.11    0.39 
 -15   0  -1    0.20    0.51 
  15   0   1    0.95    0.94 
  15   0   1    0.46    0.48 
  15   0   1    0.74    0.49 
 -16   0  -1    0.21    0.50 
  16   0   1   -0.60    0.94 
  16   0   1   -0.02    0.43 
  16   0   1   -0.13    0.44 
 -17   0  -1    0.51    0.54 
  17   0   1   -0.37    0.46 
  17   0   1   -0.20    1.10 
  17   0   1    0.39    0.46 
 -18   0  -1    0.63    0.64 
  18   0   1    1.00    0.57 
  18   0   1   -0.20    0.54 
  18   0   1    0.71    1.11 
 -19   0  -1    0.89    0.64 
  19   0   1    0.95    0.53 
  19   0   1    0.86    1.28 
 -20   0  -1   -0.14    0.61 
  20   0   1    0.55    0.55 
  20   0   1    0.37    1.23 
  19  -1  -1    1.19    0.62 
  19  -1  -1    1.16    1.24 
  19  -1  -1    0.06    0.63 
 -19   1   1    1.10    0.65 
  18  -1  -1    4.15    1.37 
  18  -1  -1    3.75    0.60 
 -18   1   1    3.84    0.71 
  17  -1  -1    3.95    1.30 
  17  -1  -1    3.73    0.59 
 -17   1   1    3.49    0.66 
  16  -1  -1   -0.05    0.52 
  16  -1  -1    0.40    1.02 
  16  -1  -1    0.27    0.51 
 -16   1   1   -0.01    0.56 
  15  -1  -1   -0.02    0.42 
  15  -1  -1   -0.21    0.48 
  15  -1  -1    0.44    0.97 
 -15   1   1   -0.04    0.48 
  14  -1  -1    0.43    0.91 
  14  -1  -1    0.15    0.43 
  14  -1  -1    0.03    0.40 
 -14   1   1   -0.15    0.44 
  13  -1  -1    4.65    1.01 
  13  -1  -1    4.32    0.47 
  13  -1  -1    3.26    0.50 
 -13   1   1    3.86    0.49 
  12  -1  -1    1.09    0.82 
  12  -1  -1    0.57    0.34 
  12  -1  -1    0.51    0.38 
 -12   1   1    0.55    0.37 
  11  -1  -1   11.25    1.04 
  11  -1  -1   10.69    1.07 
  11  -1  -1   10.98    0.63 
 -11   1   1   11.00    0.65 
  10  -1  -1    2.32    0.41 
  10  -1  -1    2.86    0.75 
  10  -1  -1    2.59    0.34 
 -10   1   1    2.02    0.34 
 -10   1   1    3.07    0.38 
   9  -1  -1    3.67    0.37 
   9  -1  -1    2.69    0.36 
   9  -1  -1    3.93    0.75 
  -9   1   1    2.56    0.31 
  -9   1   1    3.33    0.36 
   8  -1  -1    6.05    0.74 
   8  -1  -1    6.68    0.73 
   8  -1  -1    6.06    0.43 
  -8   1   1    6.02    0.45 
  -8   1   1    6.36    0.63 
   7  -1  -1   36.84    1.24 
   7  -1  -1   36.69    1.29 
   7  -1  -1   37.81    0.93 
  -7   1   1   38.59    0.93 
  -7   1   1   38.14    1.23 
  -7   1   1   37.77    0.95 
   6  -1  -1    2.39    0.54 
   6  -1  -1    2.05    0.25 
   6  -1  -1    1.94    0.24 
   6  -1  -1    1.76    0.26 
  -6   1   1    1.81    0.24 
  -6   1   1    2.20    0.24 
  -6   1   1    1.99    0.25 
   5  -1  -1    2.99    0.22 
   5  -1  -1    3.08    0.24 
   5  -1  -1    2.72    0.25 
   5  -1  -1    3.43    0.51 
  -5   1   1    3.31    0.24 
  -5   1   1    3.63    0.45 
  -5   1   1    3.16    0.23 
   4  -1  -1   63.12    1.50 
   4  -1  -1   61.46    1.22 
   4  -1  -1   61.86    1.23 
   4  -1  -1   61.58    1.50 
  -4   1   1   61.39    1.24 
  -4   1   1   63.23    1.23 
  -4   1   1   64.01    1.47 
   3  -1  -1   13.05    0.55 
   3  -1  -1   13.34    0.37 
   3  -1  -1   13.42    0.54 
   3  -1  -1   12.98    0.35 
  -3   1   1   13.36    0.36 
  -3   1   1   13.56    0.55 
  -3   1   1   13.05    0.53 
  -3   1   1   13.03    0.37 
   2  -1  -1    0.38    0.12 
   2  -1  -1    0.93    0.24 
   2  -1  -1    0.56    0.10 
   2  -1  -1    0.77    0.11 
  -2   1   1    0.14    0.06 
  -2   1   1    0.44    0.18 
  -2   1   1    0.25    0.08 
  -1   1   1    0.02    0.04 
  -1   1   1   -0.02    0.02 
   0  -1  -1   -0.01    0.01 
   0   1   1   -0.01    0.01 
  -1  -1  -1    0.02    0.02 
   1   1   1    0.00    0.02 
   1   1   1    0.00    0.01 
  -2  -1  -1    0.00    0.02 
   2   1   1    0.01    0.03 
   2   1   1    0.02    0.03 
  -3  -1  -1   97.25    1.77 
  -3  -1  -1   76.23    1.63 
   3   1   1   95.40    1.90 
   3   1   1   94.97    1.74 
   3   1   1   76.46    1.64 
  -4  -1  -1   24.54    0.64 
  -4  -1  -1   24.55    0.76 
  -4  -1  -1   24.65    0.62 
   4   1   1   24.47    0.78 
   4   1   1   23.73    0.62 
   4   1   1   24.94    0.64 
  -5  -1  -1   90.96    1.93 
  -5  -1  -1   86.98    1.93 
  -5  -1  -1   89.36    2.13 
   5   1   1   91.46    1.96 
   5   1   1   87.47    1.91 
   5   1   1   87.85    2.14 
  -6  -1  -1   24.13    0.63 
  -6  -1  -1   23.01    0.65 
  -6  -1  -1   23.49    0.82 
   6   1   1   24.59    0.65 
   6   1   1   23.65    0.87 
   6   1   1   23.47    0.64 
  -7  -1  -1   69.41    1.73 
  -7  -1  -1   70.99    1.47 
  -7  -1  -1   68.79    1.49 
   7   1   1   70.31    1.48 
   7   1   1   69.02    1.46 
   7   1   1   69.48    1.79 
  -8  -1  -1    7.41    0.63 
  -8  -1  -1    6.79    0.46 
   8   1   1    7.59    0.69 
   8   1   1    7.31    0.45 
  -9  -1  -1   43.49    1.36 
  -9  -1  -1   43.06    1.09 
   9   1   1   42.07    1.39 
   9   1   1   42.39    1.06 
 -10  -1  -1    1.66    0.34 
 -10  -1  -1    1.77    0.29 
  10   1   1    1.85    0.32 
  10   1   1    1.66    0.33 
 -11  -1  -1   14.26    0.96 
 -11  -1  -1   13.86    0.69 
  11   1   1   14.14    1.01 
  11   1   1   14.29    0.73 
 -12  -1  -1    7.74    0.61 
  12   1   1    7.91    0.66 
  12   1   1    7.82    0.92 
 -13  -1  -1   -0.29    0.36 
  13   1   1    0.08    0.35 
  13   1   1    0.21    0.72 
  13   1   1    0.27    0.36 
 -14  -1  -1    7.48    0.70 
  14   1   1    8.59    0.70 
  14   1   1    8.19    1.10 
  14   1   1    8.25    1.13 
 -15  -1  -1    0.62    0.47 
  15   1   1    0.71    0.92 
  15   1   1    0.54    0.49 
  15   1   1    1.04    0.46 
 -16  -1  -1    0.60    0.49 
  16   1   1    0.52    0.50 
  16   1   1    0.96    1.04 
  16   1   1    0.87    0.46 
 -17  -1  -1    0.97    0.62 
  17   1   1    1.05    1.09 
  17   1   1    0.17    0.50 
  17   1   1    0.83    0.55 
 -18  -1  -1    0.15    0.56 
  18   1   1    0.22    0.54 
  18   1   1    0.21    1.06 
 -19  -1  -1    0.02    0.66 
  19   1   1    0.22    1.14 
  19   1   1    0.47    0.53 
 -20  -1  -1   -0.42    0.62 
  20   1   1    0.06    0.55 
  20   1   1   -0.38    1.16 
  19  -2  -1    1.85    1.28 
  19  -2  -1    1.59    0.57 
 -19   2   1    1.38    0.67 
  18  -2  -1    0.25    0.53 
  18  -2  -1    0.70    1.26 
  18  -2  -1   -0.27    0.53 
 -18   2   1    0.87    0.61 
  17  -2  -1   -0.19    0.48 
  17  -2  -1    0.55    1.18 
  17  -2  -1   -0.39    0.53 
 -17   2   1   -0.34    0.57 
  16  -2  -1    1.41    0.62 
  16  -2  -1    2.24    0.51 
  16  -2  -1    3.40    1.31 
 -16   2   1    2.51    0.61 
  15  -2  -1    0.66    0.43 
  15  -2  -1    0.23    0.53 
  15  -2  -1    0.26    1.05 
 -15   2   1    0.97    0.51 
  14  -2  -1    2.35    0.44 
  14  -2  -1    2.91    1.03 
  14  -2  -1    1.43    0.52 
 -14   2   1    2.43    0.56 
  13  -2  -1   -0.01    0.82 
  13  -2  -1    0.01    0.38 
  13  -2  -1   -0.07    0.34 
 -13   2   1   -0.15    0.38 
  12  -2  -1    2.01    0.89 
  12  -2  -1    1.33    0.43 
  12  -2  -1    0.99    0.52 
  12  -2  -1    1.53    0.38 
 -12   2   1    1.59    0.43 
  11  -2  -1   14.21    1.08 
  11  -2  -1   13.76    0.74 
  11  -2  -1   12.92    1.15 
  11  -2  -1   14.87    1.26 
 -11   2   1   13.64    0.73 
  10  -2  -1   14.04    1.02 
  10  -2  -1   12.92    1.02 
  10  -2  -1   13.10    0.61 
  10  -2  -1   13.36    0.93 
 -10   2   1   13.28    0.64 
 -10   2   1   13.72    0.93 
   9  -2  -1   13.82    0.64 
   9  -2  -1   13.04    0.88 
   9  -2  -1   13.59    0.95 
   9  -2  -1   13.35    1.01 
  -9   2   1   13.49    0.64 
  -9   2   1   13.80    0.85 
   8  -2  -1    1.26    0.27 
   8  -2  -1    1.56    0.29 
   8  -2  -1    1.80    0.59 
   8  -2  -1    1.21    0.26 
  -8   2   1    1.11    0.26 
  -8   2   1    1.28    0.24 
   7  -2  -1    5.48    0.68 
   7  -2  -1    6.08    0.69 
   7  -2  -1    5.01    0.42 
   7  -2  -1    5.60    0.66 
  -7   2   1    5.28    0.37 
  -7   2   1    4.42    0.39 
  -7   2   1    5.57    0.57 
   6  -2  -1    2.30    0.50 
   6  -2  -1    2.04    0.23 
   6  -2  -1    2.05    0.26 
   6  -2  -1    1.95    0.24 
   6  -2  -1    2.16    0.24 
  -6   2   1    2.05    0.23 
  -6   2   1    1.91    0.21 
  -6   2   1    2.16    0.25 
   5  -2  -1    1.23    0.28 
   5  -2  -1    1.47    0.24 
   5  -2  -1    1.53    0.52 
   5  -2  -1    1.04    0.26 
   5  -2  -1    1.27    0.23 
  -5   2   1    1.48    0.24 
  -5   2   1    1.58    0.24 
  -5   2   1    1.64    0.50 
  -5   2   1    2.02    0.46 
   4  -2  -1  242.43    5.94 
   4  -2  -1  244.06    6.07 
   4  -2  -1  242.70    5.71 
   4  -2  -1  240.33    5.68 
   4  -2  -1  235.56    5.88 
  -4   2   1  242.38    6.01 
  -4   2   1  241.88    5.70 
  -4   2   1  241.20    5.70 
  -4   2   1  235.72    5.84 
   3  -2  -1    0.34    0.13 
   3  -2  -1    0.44    0.15 
   3  -2  -1    0.30    0.29 
   3  -2  -1    0.32    0.11 
  -3   2   1    0.41    0.13 
  -3   2   1    0.34    0.12 
  -3   2   1    0.40    0.28 
  -3   2   1    0.32    0.14 
   2  -2  -1   12.72    0.42 
   2  -2  -1   11.89    0.29 
   2  -2  -1   12.30    0.30 
   2  -2  -1   11.88    0.46 
  -2   2   1   10.34    0.43 
  -2   2   1   11.96    0.31 
  -2   2   1   12.55    0.42 
   1  -2  -1    0.40    0.17 
  -1   2   1    0.24    0.11 
   0   2   1    0.00    0.01 
   0   2   1    0.07    0.05 
   1   2   1    0.01    0.02 
   2   2   1    8.52    0.35 
   2   2   1    7.47    0.23 
  -3  -2  -1   26.90    0.57 
  -3  -2  -1   25.51    0.71 
  -3  -2  -1   26.23    0.55 
   3   2   1   25.56    0.55 
   3   2   1   25.06    0.56 
   3   2   1   26.16    0.72 
  -4  -2  -1    3.16    0.40 
  -4  -2  -1    3.92    0.29 
  -4  -2  -1    3.65    0.25 
   4   2   1    3.82    0.28 
   4   2   1    3.51    0.42 
   4   2   1    3.58    0.27 
  -5  -2  -1   16.76    0.56 
  -5  -2  -1   17.54    0.77 
  -5  -2  -1   16.35    0.58 
   5   2   1   17.45    0.80 
   5   2   1   16.92    0.58 
   5   2   1   16.25    0.57 
  -6  -2  -1    4.75    0.56 
  -6  -2  -1    4.36    0.37 
  -6  -2  -1    4.69    0.34 
   6   2   1    4.63    0.57 
   6   2   1    3.98    0.41 
   6   2   1    4.37    0.36 
  -7  -2  -1    2.98    0.50 
  -7  -2  -1    3.24    0.33 
  -7  -2  -1    3.32    0.38 
   7   2   1    3.11    0.57 
   7   2   1    2.63    0.30 
   7   2   1    2.98    0.35 
  -8  -2  -1    0.41    0.25 
  -8  -2  -1    0.42    0.20 
   8   2   1    0.60    0.24 
   8   2   1    0.36    0.24 
  -9  -2  -1   12.79    0.57 
  -9  -2  -1   12.57    0.74 
   9   2   1   12.51    0.90 
   9   2   1   12.89    0.55 
 -10  -2  -1    0.60    0.23 
 -10  -2  -1    0.59    0.28 
  10   2   1    0.41    0.30 
  10   2   1    0.68    0.28 
 -11  -2  -1    6.86    0.73 
 -11  -2  -1    7.60    0.58 
  11   2   1    7.53    0.94 
  11   2   1    7.55    0.55 
 -12  -2  -1    2.57    0.42 
  12   2   1    2.22    0.41 
  12   2   1    2.59    0.41 
 -13  -2  -1    9.27    0.71 
  13   2   1    9.57    0.70 
  13   2   1   10.02    1.08 
 -14  -2  -1    5.88    0.70 
  14   2   1    6.65    1.10 
  14   2   1    6.41    0.69 
 -15  -2  -1    6.08    0.76 
  15   2   1    6.20    1.19 
  15   2   1    6.18    0.73 
 -16  -2  -1    0.02    0.48 
  16   2   1    0.17    0.46 
  16   2   1   -0.31    0.49 
  16   2   1    0.58    0.99 
 -17  -2  -1    0.10    0.53 
  17   2   1    0.07    0.99 
  17   2   1   -0.16    0.53 
  17   2   1    0.25    0.54 
 -18  -2  -1    2.19    0.61 
  18   2   1    1.84    1.20 
  18   2   1    1.15    0.59 
  18   2   1    2.26    0.63 
 -19  -2  -1    2.06    0.68 
  19   2   1    0.87    0.59 
  19   2   1    1.74    1.24 
  19   2   1    2.01    0.61 
 -20  -2  -1    0.27    0.63 
  20   2   1   -0.09    0.56 
  20   2   1   -0.10    1.18 
  19  -3  -1   -0.03    0.53 
  19  -3  -1    0.55    1.20 
 -19   3   1    0.29    0.63 
  18  -3  -1    1.51    1.19 
  18  -3  -1    1.44    0.55 
 -18   3   1    1.39    0.68 
  17  -3  -1    3.64    1.27 
  17  -3  -1    2.91    0.53 
 -17   3   1    2.60    0.62 
  16  -3  -1    1.01    0.46 
  16  -3  -1    1.15    1.12 
 -16   3   1    0.69    0.53 
  15  -3  -1    2.68    0.48 
  15  -3  -1    3.27    1.14 
  15  -3  -1    1.99    0.54 
 -15   3   1    2.49    0.59 
  14  -3  -1    1.94    1.04 
  14  -3  -1    0.69    0.49 
  14  -3  -1    1.13    0.42 
 -14   3   1    1.30    0.49 
  13  -3  -1    2.14    0.43 
  13  -3  -1    1.84    0.52 
  13  -3  -1    2.15    0.97 
 -13   3   1    2.16    0.47 
  12  -3  -1    0.26    0.74 
  12  -3  -1   -0.15    0.41 
  12  -3  -1    0.03    0.37 
  12  -3  -1   -0.02    0.34 
 -12   3   1    0.06    0.36 
  11  -3  -1   18.27    1.12 
  11  -3  -1   19.15    1.22 
  11  -3  -1   20.41    0.79 
  11  -3  -1   18.66    1.24 
 -11   3   1   20.90    0.86 
  10  -3  -1   24.22    0.82 
  10  -3  -1   24.05    1.28 
  10  -3  -1   23.93    1.29 
  10  -3  -1   23.46    1.32 
 -10   3   1   25.50    0.93 
 -10   3   1   24.31    1.14 
   9  -3  -1   56.98    1.88 
   9  -3  -1   57.75    1.85 
   9  -3  -1   55.72    1.33 
   9  -3  -1   57.68    1.82 
  -9   3   1   58.57    1.76 
  -9   3   1   58.62    1.44 
   8  -3  -1    1.91    0.59 
   8  -3  -1    1.59    0.29 
   8  -3  -1    1.53    0.25 
   8  -3  -1    1.46    0.30 
  -8   3   1    1.38    0.23 
  -8   3   1    1.73    0.24 
  -8   3   1    1.48    0.25 
   7  -3  -1    0.03    0.48 
   7  -3  -1    0.05    0.26 
   7  -3  -1    0.20    0.23 
   7  -3  -1    0.11    0.24 
  -7   3   1    0.08    0.20 
  -7   3   1    0.13    0.20 
  -7   3   1   -0.03    0.24 
   6  -3  -1    1.81    0.24 
   6  -3  -1    1.60    0.26 
   6  -3  -1    2.20    0.53 
   6  -3  -1    1.66    0.23 
  -6   3   1    2.33    0.50 
  -6   3   1    1.82    0.22 
  -6   3   1    1.52    0.23 
  -6   3   1    1.81    0.27 
   5  -3  -1   11.61    0.72 
   5  -3  -1   12.16    0.44 
   5  -3  -1   12.07    0.71 
   5  -3  -1   11.99    0.43 
  -5   3   1   11.69    0.45 
  -5   3   1   13.64    0.73 
  -5   3   1   12.32    0.45 
  -5   3   1   13.20    0.74 
   4  -3  -1  230.14    5.42 
   4  -3  -1  231.71    5.80 
   4  -3  -1  230.43    5.43 
   4  -3  -1  232.78    5.72 
  -4   3   1  230.12    5.45 
  -4   3   1  237.90    5.88 
  -4   3   1  234.76    5.77 
  -4   3   1  229.92    5.43 
   3  -3  -1  342.54    9.79 
   3  -3  -1  361.25    9.45 
   3  -3  -1  352.88    9.27 
   3  -3  -1  350.04    9.97 
  -3   3   1  354.16    9.08 
  -3   3   1  358.71    9.62 
  -3   3   1  357.80    9.42 
  -3   3   1  350.80   10.01 
   2  -3  -1   11.24    0.47 
   2  -3  -1   11.60    0.42 
   2  -3  -1   10.66    0.26 
  -2   3   1   10.50    0.27 
  -2   3   1   11.39    0.43 
  -2   3   1   10.68    0.26 
  -2   3   1   10.99    0.46 
   1  -3  -1   96.86    1.93 
  -1   3   1   81.72    1.73 
  -1   3   1   93.72    1.67 
  -1   3   1   79.22    1.78 
   0   3   1    3.89    0.12 
   0   3   1    3.41    0.24 
  -1  -3  -1    0.12    0.06 
   1   3   1    0.10    0.06 
   1   3   1    0.13    0.03 
   1   3   1    0.07    0.05 
  -2  -3  -1   40.63    0.76 
  -2  -3  -1   39.63    0.75 
  -2  -3  -1   38.09    0.94 
   2   3   1   38.23    0.75 
   2   3   1   40.73    0.97 
  -3  -3  -1    0.37    0.14 
  -3  -3  -1    0.42    0.12 
  -3  -3  -1    0.45    0.14 
   3   3   1    0.41    0.13 
   3   3   1    0.51    0.14 
   3   3   1    0.40    0.15 
  -4  -3  -1  137.23    3.11 
  -4  -3  -1  136.26    3.12 
  -4  -3  -1  135.51    3.38 
   4   3   1  137.31    3.14 
   4   3   1  133.29    3.09 
   4   3   1  133.90    3.36 
  -5  -3  -1    2.64    0.26 
  -5  -3  -1    2.71    0.31 
   5   3   1    2.83    0.33 
   5   3   1    2.51    0.30 
  -6  -3  -1    9.13    0.43 
  -6  -3  -1    9.28    0.40 
  -6  -3  -1    9.48    0.63 
   6   3   1    9.20    0.43 
   6   3   1    8.61    0.43 
   6   3   1    9.67    0.68 
  -7  -3  -1   36.90    0.93 
  -7  -3  -1   38.04    1.20 
   7   3   1   36.46    0.91 
   7   3   1   37.81    1.23 
   7   3   1   36.94    0.91 
  -8  -3  -1   22.34    0.98 
  -8  -3  -1   20.61    0.71 
   8   3   1   20.32    0.69 
   8   3   1   21.56    1.01 
  -9  -3  -1   15.60    0.86 
  -9  -3  -1   15.19    0.64 
   9   3   1   15.21    0.62 
   9   3   1   15.47    0.93 
 -10  -3  -1   22.76    0.81 
 -10  -3  -1   24.22    1.10 
  10   3   1   23.41    1.15 
  10   3   1   22.78    0.79 
 -11  -3  -1   21.46    0.91 
  11   3   1   22.18    1.23 
  11   3   1   21.01    0.83 
 -12  -3  -1    7.01    0.62 
  12   3   1    7.48    0.95 
  12   3   1    7.31    0.61 
 -13  -3  -1    0.57    0.40 
  13   3   1    0.54    0.40 
  13   3   1    0.76    0.40 
 -14  -3  -1    4.33    0.53 
  14   3   1    3.13    0.51 
  14   3   1    4.33    0.53 
 -15  -3  -1    0.22    0.47 
  15   3   1    0.28    0.45 
  15   3   1    0.29    0.45 
 -16  -3  -1    3.84    0.66 
  16   3   1    3.55    0.57 
  16   3   1    4.38    1.16 
 -17  -3  -1   -0.15    0.53 
  17   3   1   -0.17    0.94 
  17   3   1   -0.18    0.49 
  17   3   1    0.00    0.49 
 -18  -3  -1   -0.32    0.60 
  18   3   1   -0.22    1.01 
  18   3   1    0.10    0.52 
  18   3   1   -0.24    0.53 
 -19  -3  -1    1.99    0.68 
  19   3   1    2.12    1.27 
  19   3   1    2.03    0.69 
  19   3   1    0.86    0.60 
 -20  -3  -1    3.83    0.83 
  20   3   1    3.52    1.44 
  20   3   1    3.28    0.75 
  19  -4  -1    0.02    1.11 
 -19   4   1   -0.17    0.59 
  18  -4  -1   -0.22    0.48 
  18  -4  -1    0.57    1.24 
 -18   4   1    0.61    0.64 
  17  -4  -1   -0.12    0.45 
  17  -4  -1   -0.16    1.03 
 -17   4   1   -0.04    0.53 
  16  -4  -1   -0.09    0.43 
  16  -4  -1   -0.26    1.00 
 -16   4   1   -0.27    0.48 
  15  -4  -1   -0.14    0.42 
  15  -4  -1    0.03    0.94 
 -15   4   1   -0.18    0.52 
  14  -4  -1    0.00    0.91 
  14  -4  -1    0.08    0.40 
 -14   4   1    0.06    0.42 
  13  -4  -1   14.53    1.31 
  13  -4  -1   13.78    0.69 
 -13   4   1   13.72    0.77 
  12  -4  -1    2.92    0.89 
  12  -4  -1    3.08    0.41 
  12  -4  -1    2.56    0.50 
 -12   4   1    2.78    0.45 
  11  -4  -1   65.11    2.24 
  11  -4  -1   65.00    1.57 
  11  -4  -1   67.16    2.17 
 -11   4   1   65.73    1.67 
 -11   4   1   62.82    2.72 
  10  -4  -1    6.03    0.53 
  10  -4  -1    5.10    0.89 
  10  -4  -1    5.70    0.91 
 -10   4   1    5.41    0.52 
 -10   4   1    5.45    0.78 
   9  -4  -1    0.46    0.60 
   9  -4  -1    0.56    0.25 
   9  -4  -1    0.64    0.29 
  -9   4   1    0.49    0.24 
  -9   4   1    0.70    0.28 
   8  -4  -1   20.20    0.67 
   8  -4  -1   20.93    1.01 
   8  -4  -1   20.35    1.09 
  -8   4   1   20.38    0.93 
  -8   4   1   20.12    0.70 
  -8   4   1   20.84    0.69 
   7  -4  -1    8.31    0.72 
   7  -4  -1    7.86    0.72 
   7  -4  -1    8.16    0.41 
  -7   4   1    8.70    0.41 
  -7   4   1    8.10    0.65 
  -7   4   1    8.24    0.76 
  -7   4   1    8.35    0.43 
   6  -4  -1    0.06    0.17 
   6  -4  -1    0.35    0.44 
   6  -4  -1    0.16    0.24 
   6  -4  -1    0.15    0.18 
  -6   4   1    0.17    0.20 
  -6   4   1    0.21    0.43 
  -6   4   1    0.16    0.21 
  -6   4   1    0.01    0.17 
   5  -4  -1   21.94    0.83 
   5  -4  -1   22.74    0.55 
   5  -4  -1   21.92    0.87 
   5  -4  -1   22.94    0.56 
  -5   4   1   22.71    0.58 
  -5   4   1   21.94    0.82 
  -5   4   1   22.82    0.85 
  -5   4   1   22.57    0.86 
  -5   4   1   23.05    0.61 
   4  -4  -1   31.83    1.03 
   4  -4  -1   31.74    0.75 
   4  -4  -1   31.84    0.75 
   4  -4  -1   30.29    1.07 
  -4   4   1   32.16    0.77 
  -4   4   1   32.79    1.04 
  -4   4   1   31.96    1.09 
  -4   4   1   31.83    0.79 
  -4   4   1   31.79    1.06 
   3  -4  -1   37.05    0.75 
   3  -4  -1   35.12    0.99 
   3  -4  -1   36.05    0.75 
   3  -4  -1   34.96    1.06 
  -3   4   1   35.01    1.01 
  -3   4   1   36.16    1.06 
  -3   4   1   35.89    0.79 
  -3   4   1   36.61    0.77 
   2  -4  -1    3.39    0.39 
   2  -4  -1    3.52    0.35 
   2  -4  -1    4.01    0.15 
  -2   4   1    3.97    0.20 
  -2   4   1    3.92    0.19 
  -2   4   1    3.84    0.38 
  -2   4   1    3.58    0.39 
   1  -4  -1  122.84    2.87 
  -1   4   1  126.28    2.63 
  -1   4   1  129.12    2.94 
  -1   4   1  126.97    2.63 
  -1   4   1  125.55    2.82 
   0  -4  -1    4.12    0.41 
   0   4   1    4.22    0.20 
   0   4   1    4.24    0.15 
   0   4   1    4.20    0.36 
   0   4   1    4.41    0.15 
  -1  -4  -1   68.77    1.25 
  -1  -4  -1   67.37    1.25 
   1   4   1   64.48    1.24 
   1   4   1   67.51    1.27 
   1   4   1   65.15    1.26 
  -2  -4  -1   14.25    0.29 
  -2  -4  -1   13.93    0.51 
  -2  -4  -1   14.04    0.29 
  -2  -4  -1   13.35    0.22 
   2   4   1   13.92    0.52 
   2   4   1   13.72    0.31 
   2   4   1   13.63    0.23 
   2   4   1   13.96    0.31 
  -3  -4  -1    4.00    0.45 
  -3  -4  -1    3.77    0.16 
  -3  -4  -1    3.44    0.24 
  -3  -4  -1    3.22    0.25 
   3   4   1    3.66    0.44 
   3   4   1    3.40    0.26 
   3   4   1    3.36    0.26 
  -4  -4  -1   55.85    1.12 
  -4  -4  -1   54.69    1.12 
  -4  -4  -1   54.30    1.40 
   4   4   1   54.26    1.12 
   4   4   1   54.86    1.14 
   4   4   1   54.67    1.42 
  -5  -4  -1   23.55    0.65 
  -5  -4  -1   24.06    0.67 
  -5  -4  -1   24.58    0.94 
   5   4   1   24.77    0.96 
   5   4   1   24.28    0.67 
   5   4   1   23.77    0.66 
  -6  -4  -1    4.62    0.54 
  -6  -4  -1    4.41    0.40 
  -6  -4  -1    4.02    0.33 
   6   4   1    4.40    0.34 
   6   4   1    4.08    0.34 
   6   4   1    4.97    0.59 
  -7  -4  -1   56.65    1.37 
  -7  -4  -1   56.51    1.68 
   7   4   1   56.31    1.34 
   7   4   1   57.34    1.36 
   7   4   1   53.77    1.67 
  -8  -4  -1    1.63    0.25 
  -8  -4  -1    1.90    0.32 
   8   4   1    1.47    0.29 
   8   4   1    1.54    0.26 
  -9  -4  -1   26.12    1.08 
  -9  -4  -1   25.23    0.78 
   9   4   1   25.75    1.11 
   9   4   1   24.95    0.76 
 -10  -4  -1    0.25    0.31 
 -10  -4  -1    0.25    0.26 
  10   4   1    0.35    0.29 
  10   4   1    0.39    0.31 
 -11  -4  -1    3.06    0.43 
  11   4   1    2.13    0.43 
  11   4   1    2.38    0.39 
 -12  -4  -1    0.53    0.35 
  12   4   1    0.47    0.36 
  12   4   1    0.64    0.36 
 -13  -4  -1   -0.09    0.35 
  13   4   1    0.05    0.36 
  13   4   1   -0.18    0.37 
 -14  -4  -1    9.90    0.78 
  14   4   1    9.22    0.76 
  14   4   1    9.14    1.17 
 -15  -4  -1   17.48    0.98 
  15   4   1   17.54    1.47 
  15   4   1   17.88    0.95 
 -16  -4  -1    3.53    0.61 
  16   4   1    3.67    0.59 
 -17  -4  -1    0.97    0.56 
  17   4   1    0.96    0.53 
  17   4   1    0.39    0.52 
  17   4   1    0.91    1.01 
 -18  -4  -1    3.39    0.72 
  18   4   1    2.75    0.62 
  18   4   1    3.53    1.22 
  18   4   1    1.99    0.63 
 -19  -4  -1    0.26    0.60 
  19   4   1    0.28    1.14 
  19   4   1   -0.17    0.57 
  19   4   1   -0.46    0.56 
 -20  -4  -1    0.61    0.65 
  20   4   1    0.71    1.24 
  20   4   1   -0.27    0.60 
  20   4   1    1.07    0.64 
  18  -5  -1   -0.13    1.07 
 -18   5   1   -0.26    0.60 
  17  -5  -1    1.29    0.52 
  17  -5  -1    2.11    1.27 
 -17   5   1    1.87    0.60 
  16  -5  -1    0.30    1.01 
  16  -5  -1    0.25    0.43 
 -16   5   1   -0.11    0.49 
  15  -5  -1    0.40    0.95 
  15  -5  -1    0.74    0.42 
 -15   5   1    0.46    0.53 
  14  -5  -1    1.80    1.02 
  14  -5  -1    1.09    0.43 
 -14   5   1    1.25    0.47 
  13  -5  -1    0.47    0.86 
  13  -5  -1    0.84    0.37 
 -13   5   1    0.82    0.43 
  12  -5  -1    0.00    0.30 
  12  -5  -1   -0.03    0.45 
  12  -5  -1    0.21    0.78 
 -12   5   1   -0.01    0.38 
  11  -5  -1   -0.17    0.33 
  11  -5  -1    0.04    0.29 
  11  -5  -1   -0.28    0.68 
 -11   5   1   -0.17    0.31 
 -11   5   1   -0.01    0.34 
  10  -5  -1   12.26    1.06 
  10  -5  -1   14.00    0.64 
  10  -5  -1   12.73    1.05 
 -10   5   1   13.27    0.65 
 -10   5   1   12.21    0.92 
   9  -5  -1   12.32    0.94 
   9  -5  -1   12.04    0.54 
   9  -5  -1   11.56    1.04 
  -9   5   1   11.50    0.85 
  -9   5   1   11.84    0.57 
   8  -5  -1    0.86    0.32 
   8  -5  -1    1.03    0.24 
   8  -5  -1    1.28    0.62 
  -8   5   1    0.88    0.26 
  -8   5   1    0.69    0.27 
  -8   5   1    1.11    0.27 
   7  -5  -1    0.08    0.25 
   7  -5  -1   -0.07    0.46 
   7  -5  -1   -0.03    0.18 
  -7   5   1   -0.03    0.44 
  -7   5   1   -0.01    0.21 
  -7   5   1    0.01    0.18 
  -7   5   1   -0.02    0.22 
   6  -5  -1   13.66    0.43 
   6  -5  -1   12.95    0.41 
   6  -5  -1   13.46    0.42 
   6  -5  -1   12.80    0.81 
   6  -5  -1   13.12    0.70 
  -6   5   1   13.02    0.74 
  -6   5   1   13.43    0.49 
  -6   5   1   13.46    0.80 
  -6   5   1   13.24    0.73 
  -6   5   1   13.02    0.44 
   5  -5  -1    2.87    0.24 
   5  -5  -1    3.20    0.53 
   5  -5  -1    2.28    0.27 
   5  -5  -1    2.83    0.24 
   5  -5  -1    2.94    0.25 
  -5   5   1    2.62    0.22 
  -5   5   1    3.58    0.59 
  -5   5   1    3.27    0.55 
  -5   5   1    2.24    0.25 
  -5   5   1    2.67    0.24 
   4  -5  -1    9.54    0.68 
   4  -5  -1    9.44    0.30 
   4  -5  -1   10.73    0.61 
   4  -5  -1    9.80    0.30 
   4  -5  -1    9.73    0.30 
  -4   5   1    9.53    0.35 
  -4   5   1    9.36    0.34 
  -4   5   1    9.94    0.67 
  -4   5   1   11.04    0.66 
   3  -5  -1    2.97    0.45 
   3  -5  -1    3.07    0.15 
  -3   5   1    3.02    0.24 
  -3   5   1    3.30    0.24 
  -3   5   1    3.25    0.50 
   2  -5  -1  215.98    5.21 
  -2   5   1  218.93    4.89 
  -2   5   1  217.98    4.92 
  -2   5   1  222.96    5.25 
  -2   5   1  222.19    5.28 
   1  -5  -1   33.07    1.04 
  -1   5   1   34.46    1.05 
  -1   5   1   34.29    0.71 
  -1   5   1   34.46    0.80 
  -1   5   1   34.37    0.71 
   0  -5  -1    0.50    0.30 
   0   5   1    0.59    0.06 
   0   5   1    0.50    0.28 
   0   5   1    0.60    0.06 
   0   5   1    0.51    0.11 
  -1  -5  -1   38.65    0.70 
   1   5   1   38.54    0.98 
   1   5   1   38.92    0.70 
   1   5   1   38.68    0.70 
   1   5   1   39.85    1.05 
   1   5   1   38.43    0.70 
  -2  -5  -1   13.54    0.37 
  -2  -5  -1   13.31    0.34 
   2   5   1   13.61    0.40 
   2   5   1   13.28    0.71 
   2   5   1   13.21    0.40 
   2   5   1   13.13    0.33 
  -3  -5  -1    8.44    0.33 
  -3  -5  -1    8.58    0.24 
  -3  -5  -1    8.75    0.63 
  -3  -5  -1    8.65    0.30 
   3   5   1    9.00    0.60 
   3   5   1    8.66    0.34 
   3   5   1    8.07    0.34 
  -4  -5  -1   57.54    1.40 
  -4  -5  -1   57.43    0.98 
  -4  -5  -1   57.92    1.09 
  -4  -5  -1   58.30    1.07 
   4   5   1   56.94    1.07 
   4   5   1   57.68    1.42 
   4   5   1   57.12    1.09 
  -5  -5  -1   13.85    0.75 
  -5  -5  -1   13.60    0.47 
  -5  -5  -1   14.07    0.49 
   5   5   1   13.97    0.49 
   5   5   1   13.84    0.77 
   5   5   1   13.49    0.52 
  -6  -5  -1    6.06    0.39 
  -6  -5  -1    6.43    0.63 
  -6  -5  -1    6.27    0.41 
   6   5   1    6.10    0.40 
   6   5   1    6.71    0.67 
   6   5   1    5.60    0.40 
  -7  -5  -1    6.26    0.63 
  -7  -5  -1    5.65    0.45 
   7   5   1    5.75    0.42 
   7   5   1    6.35    0.69 
   7   5   1    5.73    0.41 
  -8  -5  -1    0.00    0.21 
  -8  -5  -1   -0.26    0.24 
   8   5   1    0.12    0.25 
   8   5   1   -0.19    0.26 
  -9  -5  -1    0.98    0.29 
  -9  -5  -1    1.10    0.26 
   9   5   1    1.08    0.29 
   9   5   1    0.89    0.30 
 -10  -5  -1    6.58    0.53 
  10   5   1    6.70    0.53 
  10   5   1    7.20    0.86 
 -11  -5  -1    0.62    0.34 
  11   5   1    0.73    0.37 
  11   5   1    0.75    0.35 
 -12  -5  -1    7.50    0.64 
  12   5   1    7.54    0.65 
  12   5   1    8.90    1.05 
 -13  -5  -1   13.48    0.79 
  13   5   1   14.35    1.22 
  13   5   1   13.23    0.78 
 -14  -5  -1    0.33    0.43 
  14   5   1    0.77    0.49 
  14   5   1    0.45    0.48 
 -15  -5  -1    5.89    0.68 
  15   5   1    4.36    0.61 
  15   5   1    5.76    0.63 
 -16  -5  -1    0.46    0.52 
  16   5   1    0.33    0.48 
  16   5   1   -0.06    0.48 
 -17  -5  -1   -0.31    0.51 
  17   5   1   -0.11    0.53 
  17   5   1    0.54    0.53 
 -18  -5  -1    1.06    0.65 
  18   5   1    1.41    1.15 
  18   5   1    1.12    0.58 
  18   5   1    0.40    0.58 
 -19  -5  -1    2.52    0.70 
  19   5   1    2.09    0.65 
  19   5   1    3.29    1.32 
 -20  -5  -1    3.39    0.75 
  20   5   1    3.24    0.77 
  20   5   1    3.10    1.36 
  18  -6  -1    1.06    1.11 
 -18   6   1    0.02    0.57 
  17  -6  -1    0.55    1.05 
 -17   6   1    0.13    0.59 
  16  -6  -1    0.14    0.96 
  16  -6  -1    0.01    0.41 
 -16   6   1    0.62    0.51 
  15  -6  -1    3.63    1.21 
  15  -6  -1    3.42    0.50 
 -15   6   1    3.84    0.57 
  14  -6  -1   -0.54    0.84 
  14  -6  -1    0.00    0.36 
 -14   6   1    0.09    0.47 
  13  -6  -1    3.83    0.47 
  13  -6  -1    4.26    1.09 
 -13   6   1    3.87    0.53 
  12  -6  -1    2.00    0.37 
  12  -6  -1    1.89    0.94 
 -12   6   1    1.93    0.41 
  11  -6  -1    1.55    0.32 
  11  -6  -1    1.28    0.42 
  11  -6  -1    1.68    0.80 
 -11   6   1    1.18    0.37 
 -11   6   1    1.15    0.38 
  10  -6  -1    7.37    0.95 
  10  -6  -1    8.17    0.51 
  10  -6  -1    7.82    0.96 
 -10   6   1    7.26    0.83 
 -10   6   1    7.90    0.61 
   9  -6  -1    1.13    0.35 
   9  -6  -1    0.77    0.65 
   9  -6  -1    1.06    0.24 
  -9   6   1    0.85    0.29 
  -9   6   1    0.76    0.28 
   8  -6  -1    3.89    0.64 
   8  -6  -1    4.03    0.77 
   8  -6  -1    4.02    0.38 
  -8   6   1    3.72    0.60 
  -8   6   1    4.02    0.40 
  -8   6   1    3.78    0.39 
   7  -6  -1    0.15    0.23 
   7  -6  -1    0.33    0.19 
   7  -6  -1   -0.19    0.47 
   7  -6  -1    0.13    0.17 
  -7   6   1    0.12    0.23 
  -7   6   1    0.06    0.46 
  -7   6   1    0.03    0.21 
  -7   6   1    0.26    0.21 
   6  -6  -1   23.53    0.56 
   6  -6  -1   23.10    0.57 
   6  -6  -1   22.48    0.98 
   6  -6  -1   22.76    0.92 
  -6   6   1   23.63    0.99 
  -6   6   1   23.51    0.63 
  -6   6   1   23.18    0.66 
  -6   6   1   23.37    1.00 
  -6   6   1   23.08    0.93 
   5  -6  -1   49.10    1.53 
   5  -6  -1   48.16    1.00 
   5  -6  -1   47.53    1.00 
   5  -6  -1   51.04    1.46 
  -5   6   1   50.38    1.48 
  -5   6   1   49.57    1.47 
  -5   6   1   49.24    1.08 
  -5   6   1   46.85    1.08 
   4  -6  -1   43.60    0.78 
   4  -6  -1   42.82    1.18 
   4  -6  -1   41.72    1.23 
  -4   6   1   43.68    0.88 
  -4   6   1   42.81    1.23 
  -4   6   1   43.96    1.27 
  -4   6   1   43.63    0.89 
   3  -6  -1    5.27    0.57 
  -3   6   1    6.03    0.57 
  -3   6   1    5.55    0.58 
  -3   6   1    5.75    0.25 
  -3   6   1    6.01    0.26 
   2  -6  -1   48.74    1.35 
  -2   6   1   50.72    1.37 
  -2   6   1   50.85    1.09 
  -2   6   1   50.35    0.98 
  -2   6   1   50.49    0.98 
  -2   6   1   50.45    1.34 
   1  -6  -1   62.85    1.59 
  -1   6   1   63.68    1.17 
  -1   6   1   64.24    1.30 
  -1   6   1   63.26    1.18 
  -1   6   1   64.96    1.60 
   0  -6  -1   17.27    0.68 
   0   6   1   18.05    0.68 
   0   6   1   17.59    0.34 
   0   6   1   17.89    0.34 
   0   6   1   18.30    0.43 
  -1  -6  -1   42.08    0.80 
   1   6   1   41.60    1.15 
   1   6   1   42.57    0.78 
   1   6   1   41.98    1.15 
   1   6   1   42.53    0.78 
   1   6   1   42.30    0.79 
  -2  -6  -1    1.57    0.10 
  -2  -6  -1    1.59    0.11 
   2   6   1    1.54    0.14 
   2   6   1    1.62    0.11 
   2   6   1    1.21    0.21 
   2   6   1    1.51    0.14 
  -3  -6  -1   13.59    0.35 
  -3  -6  -1   14.12    0.42 
  -3  -6  -1   13.90    0.42 
  -3  -6  -1   13.25    0.74 
   3   6   1   13.32    0.35 
   3   6   1   13.89    0.45 
   3   6   1   13.70    0.45 
   3   6   1   13.44    0.75 
  -4  -6  -1   19.55    0.53 
  -4  -6  -1   18.55    0.44 
  -4  -6  -1   18.57    0.86 
  -4  -6  -1   18.65    0.54 
   4   6   1   18.79    0.57 
   4   6   1   18.53    0.57 
   4   6   1   18.83    0.88 
  -5  -6  -1   39.07    0.89 
  -5  -6  -1   39.03    0.78 
  -5  -6  -1   39.32    0.88 
  -5  -6  -1   39.57    1.27 
   5   6   1   38.65    0.90 
   5   6   1   40.89    1.31 
   5   6   1   38.72    0.90 
  -6  -6  -1   23.12    1.01 
  -6  -6  -1   23.18    0.69 
   6   6   1   22.55    0.67 
   6   6   1   23.07    1.07 
   6   6   1   23.53    0.69 
  -7  -6  -1   -0.05    0.24 
  -7  -6  -1    0.05    0.21 
   7   6   1    0.05    0.24 
   7   6   1   -0.25    0.24 
   7   6   1    0.10    0.21 
  -8  -6  -1    3.84    0.33 
  -8  -6  -1    3.10    0.32 
   8   6   1    3.30    0.35 
   8   6   1    3.88    0.35 
  -9  -6  -1    3.08    0.39 
  -9  -6  -1    2.05    0.34 
   9   6   1    1.87    0.35 
   9   6   1    2.90    0.36 
 -10  -6  -1    6.14    0.53 
  10   6   1    6.52    0.88 
  10   6   1    5.99    0.53 
 -11  -6  -1    9.33    0.62 
  11   6   1   10.57    1.02 
  11   6   1    9.56    0.63 
 -12  -6  -1   -0.29    0.34 
  12   6   1   -0.18    0.38 
  12   6   1    0.11    0.35 
 -13  -6  -1    1.47    0.44 
  13   6   1    1.28    0.46 
  13   6   1    1.39    0.44 
 -14  -6  -1    0.00    0.43 
  14   6   1    0.26    0.49 
  14   6   1    0.17    0.44 
 -15  -6  -1    3.76    0.61 
  15   6   1    3.80    0.59 
 -16  -6  -1    0.81    0.52 
  16   6   1    0.98    0.57 
  16   6   1    0.32    0.51 
 -17  -6  -1   -0.17    0.56 
  17   6   1   -0.25    0.56 
  17   6   1   -0.32    0.52 
 -18  -6  -1    0.91    0.64 
  18   6   1    0.57    0.63 
  18   6   1    0.00    0.56 
 -19  -6  -1    1.72    0.65 
  19   6   1    2.06    0.72 
  19   6   1    1.79    1.30 
  18  -7  -1    2.58    1.32 
 -18   7   1    1.32    0.65 
  17  -7  -1    0.60    1.05 
 -17   7   1   -0.20    0.51 
  16  -7  -1    7.62    1.37 
 -16   7   1    7.71    0.94 
  15  -7  -1   11.38    0.79 
  15  -7  -1   11.82    1.41 
 -15   7   1   11.59    0.86 
  14  -7  -1    6.34    1.21 
  14  -7  -1    5.53    0.50 
 -14   7   1    5.85    0.59 
  13  -7  -1    6.99    1.23 
  13  -7  -1    7.07    0.64 
 -13   7   1    7.20    0.76 
  12  -7  -1    1.29    0.35 
  12  -7  -1    1.07    0.88 
 -12   7   1    1.35    0.43 
  11  -7  -1    1.04    0.41 
  11  -7  -1    1.26    0.30 
  11  -7  -1    1.71    0.80 
 -11   7   1    1.64    0.35 
  10  -7  -1    0.17    0.34 
  10  -7  -1    0.06    0.24 
  10  -7  -1    0.10    0.65 
 -10   7   1   -0.06    0.30 
 -10   7   1    0.05    0.27 
   9  -7  -1    2.93    0.81 
   9  -7  -1    2.84    0.29 
  -9   7   1    3.43    0.35 
  -9   7   1    2.90    0.36 
   8  -7  -1    1.03    0.34 
   8  -7  -1    1.18    0.65 
   8  -7  -1    1.32    0.22 
  -8   7   1    1.26    0.25 
  -8   7   1    1.14    0.28 
  -8   7   1    1.03    0.28 
   7  -7  -1    1.69    0.21 
   7  -7  -1    2.11    0.63 
   7  -7  -1    1.52    0.21 
   7  -7  -1    1.30    0.33 
  -7   7   1    1.16    0.36 
  -7   7   1    0.97    0.27 
  -7   7   1    1.44    0.25 
  -7   7   1    1.48    0.28 
  -7   7   1    1.76    0.59 
   6  -7  -1   19.02    0.46 
   6  -7  -1   20.20    0.92 
   6  -7  -1   18.33    0.92 
  -6   7   1   19.86    0.98 
  -6   7   1   17.98    0.57 
  -6   7   1   18.38    0.55 
  -6   7   1   19.58    0.92 
  -6   7   1   19.41    0.90 
   5  -7  -1    6.88    0.21 
   5  -7  -1    6.73    0.21 
   5  -7  -1    6.49    0.63 
   5  -7  -1    6.64    0.71 
  -5   7   1    6.92    0.70 
  -5   7   1    7.08    0.37 
  -5   7   1    7.13    0.35 
  -5   7   1    6.79    0.72 
   4  -7  -1    0.00    0.20 
   4  -7  -1    0.00    0.39 
  -4   7   1    0.20    0.15 
  -4   7   1    0.13    0.25 
  -4   7   1    0.21    0.43 
  -4   7   1    0.13    0.14 
   3  -7  -1    9.00    0.66 
  -3   7   1    9.70    0.32 
  -3   7   1   10.01    0.69 
  -3   7   1    9.91    0.32 
  -3   7   1    9.69    0.43 
  -3   7   1    9.32    0.63 
   2  -7  -1    6.80    0.57 
  -2   7   1    6.93    0.36 
  -2   7   1    6.92    0.24 
  -2   7   1    7.03    0.61 
  -2   7   1    6.89    0.61 
  -2   7   1    7.16    0.24 
   1  -7  -1   22.54    0.81 
  -1   7   1   23.73    0.39 
  -1   7   1   23.86    0.83 
  -1   7   1   23.79    0.54 
  -1   7   1   23.48    0.39 
   0   7   1    3.17    0.47 
   0   7   1    3.25    0.14 
   0   7   1    3.16    0.13 
   0   7   1    3.17    0.21 
  -1  -7  -1   74.85    1.43 
   1   7   1   76.65    1.87 
   1   7   1   74.37    1.39 
   1   7   1   74.90    1.40 
   1   7   1   75.27    1.43 
   1   7   1   75.97    1.82 
  -2  -7  -1    0.24    0.11 
   2   7   1    0.13    0.14 
   2   7   1    0.19    0.23 
   2   7   1    0.15    0.13 
   2   7   1    0.09    0.10 
  -3  -7  -1   68.11    1.33 
  -3  -7  -1   69.82    1.83 
  -3  -7  -1   67.96    1.34 
  -3  -7  -1   69.76    1.35 
   3   7   1   69.28    1.83 
   3   7   1   68.14    1.32 
   3   7   1   70.14    1.42 
   3   7   1   68.75    1.42 
  -4  -7  -1    7.72    0.69 
  -4  -7  -1    7.84    0.32 
  -4  -7  -1    7.25    0.24 
  -4  -7  -1    7.28    0.33 
   4   7   1    7.15    0.36 
   4   7   1    7.36    0.35 
   4   7   1    7.58    0.67 
  -5  -7  -1    0.58    0.13 
  -5  -7  -1    0.37    0.18 
  -5  -7  -1    0.46    0.24 
  -5  -7  -1    0.47    0.16 
   5   7   1    0.50    0.25 
   5   7   1    0.39    0.22 
   5   7   1    0.50    0.19 
  -6  -7  -1    2.21    0.27 
  -6  -7  -1    2.77    0.27 
  -6  -7  -1    2.58    0.17 
   6   7   1    2.50    0.26 
   6   7   1    2.06    0.29 
   6   7   1    2.78    0.26 
  -7  -7  -1   37.60    1.32 
  -7  -7  -1   37.17    0.77 
  -7  -7  -1   38.01    0.90 
   7   7   1   37.05    1.32 
   7   7   1   37.51    0.93 
   7   7   1   38.03    0.93 
  -8  -7  -1    0.50    0.25 
  -8  -7  -1    0.27    0.26 
   8   7   1    0.27    0.26 
   8   7   1    0.38    0.29 
  -9  -7  -1   10.86    0.57 
   9   7   1   11.87    0.98 
   9   7   1   10.80    0.64 
 -10  -7  -1   31.43    1.00 
  10   7   1   30.76    0.97 
  10   7   1   32.20    1.46 
 -11  -7  -1   45.04    1.22 
  11   7   1   44.61    1.74 
  11   7   1   44.57    1.26 
 -12  -7  -1   -0.38    0.35 
  12   7   1   -0.52    0.36 
  12   7   1    0.10    0.39 
 -13  -7  -1    0.64    0.45 
  13   7   1    0.53    0.40 
  13   7   1    0.65    0.42 
 -14  -7  -1   -0.14    0.48 
  14   7   1    0.06    0.46 
  14   7   1   -0.06    0.45 
 -15  -7  -1    1.37    0.57 
  15   7   1    1.31    0.52 
  15   7   1    0.85    0.53 
 -16  -7  -1    2.19    0.62 
  16   7   1    1.65    0.55 
  16   7   1    0.93    0.60 
 -17  -7  -1   -0.06    0.51 
  17   7   1   -0.46    0.51 
  17   7   1    0.00    0.58 
 -18  -7  -1    0.64    0.57 
  18   7   1   -0.40    0.54 
  18   7   1    1.13    0.65 
 -19  -7  -1    0.09    0.57 
  19   7   1   -0.08    0.65 
  17  -8  -1    0.10    1.01 
 -17   8   1    0.13    0.59 
  16  -8  -1    1.80    1.06 
 -16   8   1    1.00    0.53 
  15  -8  -1    1.31    1.03 
 -15   8   1    0.98    0.53 
  14  -8  -1   -0.25    0.86 
  14  -8  -1    0.09    0.61 
 -14   8   1    0.38    0.49 
  13  -8  -1    2.13    0.37 
  13  -8  -1    3.29    1.12 
 -13   8   1    2.21    0.44 
  12  -8  -1   10.42    1.18 
  12  -8  -1    9.97    0.60 
 -12   8   1   10.71    0.70 
  11  -8  -1    1.24    0.73 
  11  -8  -1    1.59    0.37 
  11  -8  -1    1.68    0.26 
 -11   8   1    1.45    0.35 
  10  -8  -1    1.92    0.25 
  10  -8  -1    1.83    0.78 
  10  -8  -1    1.70    0.41 
 -10   8   1    1.89    0.35 
 -10   8   1    1.47    0.31 
   9  -8  -1   -0.36    0.57 
   9  -8  -1   -0.10    0.31 
   9  -8  -1   -0.16    0.18 
  -9   8   1   -0.07    0.23 
  -9   8   1   -0.15    0.26 
  -9   8   1   -0.13    0.25 
   8  -8  -1   16.96    1.07 
   8  -8  -1   17.46    1.00 
   8  -8  -1   17.45    0.47 
   8  -8  -1   17.94    0.56 
  -8   8   1   17.28    1.07 
  -8   8   1   17.84    0.59 
  -8   8   1   17.38    0.62 
  -8   8   1   17.41    0.92 
   7  -8  -1    2.63    0.33 
   7  -8  -1    3.04    0.63 
   7  -8  -1    2.83    0.20 
  -7   8   1    2.92    0.27 
  -7   8   1    2.43    0.38 
  -7   8   1    2.85    0.25 
  -7   8   1    2.40    0.28 
   6  -8  -1    0.17    0.24 
   6  -8  -1    0.21    0.46 
  -6   8   1    0.25    0.19 
  -6   8   1    0.32    0.53 
  -6   8   1    0.22    0.18 
  -6   8   1    0.18    0.29 
   5  -8  -1    0.67    0.23 
   5  -8  -1    0.44    0.43 
  -5   8   1    0.50    0.16 
  -5   8   1    0.70    0.30 
  -5   8   1    0.49    0.43 
  -5   8   1    0.69    0.16 
   4  -8  -1   22.05    0.97 
  -4   8   1   22.43    0.93 
  -4   8   1   21.89    0.54 
  -4   8   1   22.08    0.66 
  -4   8   1   22.26    0.54 
  -4   8   1   22.41    0.92 
   3  -8  -1   24.34    0.97 
  -3   8   1   24.61    0.68 
  -3   8   1   24.81    0.54 
  -3   8   1   24.51    0.54 
  -3   8   1   25.23    0.99 
  -3   8   1   24.98    0.97 
   2  -8  -1    4.40    0.53 
  -2   8   1    4.57    0.57 
  -2   8   1    4.07    0.19 
  -2   8   1    4.40    0.60 
  -2   8   1    4.31    0.31 
  -2   8   1    4.35    0.19 
   1  -8  -1   17.30    0.71 
  -1   8   1   17.75    0.70 
  -1   8   1   17.56    0.30 
  -1   8   1   17.77    0.30 
  -1   8   1   17.48    0.44 
   0   8   1    2.00    0.22 
   0   8   1    2.31    0.49 
   0   8   1    1.78    0.14 
   0   8   1    1.89    0.14 
  -1  -8  -1   30.81    0.65 
   1   8   1   30.26    0.60 
   1   8   1   30.90    1.00 
   1   8   1   30.68    0.64 
   1   8   1   30.80    1.02 
   1   8   1   30.14    0.60 
  -2  -8  -1   12.75    0.32 
   2   8   1   13.16    0.71 
   2   8   1   12.98    0.34 
   2   8   1   13.10    0.32 
   2   8   1   12.78    0.34 
  -3  -8  -1   20.88    0.42 
  -3  -8  -1   20.32    0.44 
   3   8   1   20.41    0.52 
   3   8   1   20.68    0.52 
   3   8   1   20.56    0.43 
   3   8   1   21.18    0.94 
  -4  -8  -1    3.44    0.28 
  -4  -8  -1    3.89    0.24 
  -4  -8  -1    3.98    0.18 
  -4  -8  -1    3.92    0.24 
   4   8   1    3.69    0.24 
   4   8   1    3.46    0.31 
   4   8   1    4.09    0.28 
  -5  -8  -1   71.13    1.95 
  -5  -8  -1   67.79    1.31 
  -5  -8  -1   68.30    1.41 
  -5  -8  -1   70.15    1.40 
   5   8   1   70.36    1.95 
   5   8   1   68.98    1.47 
   5   8   1   68.52    1.47 
  -6  -8  -1   96.93    2.03 
  -6  -8  -1   95.36    1.91 
  -6  -8  -1   97.53    2.60 
   6   8   1   97.67    2.09 
   6   8   1   96.32    2.07 
   6   8   1   97.74    2.60 
  -7  -8  -1    0.92    0.19 
  -7  -8  -1    0.67    0.28 
  -7  -8  -1    1.10    0.27 
   7   8   1    1.07    0.31 
   7   8   1    0.76    0.31 
   7   8   1    1.07    0.26 
  -8  -8  -1   13.94    0.45 
  -8  -8  -1   13.82    0.60 
  -8  -8  -1   14.98    1.16 
   8   8   1   14.77    0.99 
   8   8   1   13.74    0.61 
  -9  -8  -1   41.05    1.12 
  -9  -8  -1   40.97    0.97 
   9   8   1   42.83    1.68 
   9   8   1   40.43    1.15 
 -10  -8  -1   14.98    0.72 
  10   8   1   16.07    1.19 
  10   8   1   15.66    0.82 
 -11  -8  -1    1.16    0.40 
  11   8   1    1.03    0.42 
  11   8   1    1.07    0.38 
 -12  -8  -1    3.48    0.49 
  12   8   1    3.47    0.51 
  12   8   1    4.83    1.01 
 -13  -8  -1    1.67    0.51 
  13   8   1    1.48    0.52 
  13   8   1    1.68    0.53 
 -14  -8  -1    1.27    0.52 
  14   8   1    1.13    0.49 
  14   8   1    1.56    0.51 
 -15  -8  -1    0.91    0.53 
  15   8   1    0.64    0.52 
  15   8   1    0.94    0.51 
 -16  -8  -1   10.68    0.89 
  16   8   1   10.87    0.91 
  16   8   1    9.15    1.44 
 -17  -8  -1    5.23    0.71 
  17   8   1    4.93    0.76 
 -18  -8  -1    0.55    0.63 
  18   8   1    0.16    0.63 
  18   8   1   -0.26    0.65 
 -19  -8  -1   -0.19    0.63 
  19   8   1    0.24    0.70 
  17  -9  -1    0.40    1.00 
 -17   9   1    0.03    0.52 
  16  -9  -1    0.85    0.96 
 -16   9   1    0.38    0.53 
  15  -9  -1    3.26    1.11 
 -15   9   1    2.48    0.60 
  14  -9  -1    6.55    1.33 
 -14   9   1    4.98    0.60 
  13  -9  -1    2.74    0.98 
 -13   9   1    2.83    0.47 
  12  -9  -1    2.07    0.30 
  12  -9  -1    1.78    0.82 
 -12   9   1    2.36    0.43 
  11  -9  -1   -0.04    0.44 
  11  -9  -1    0.01    0.23 
  11  -9  -1    0.05    0.72 
 -11   9   1    0.38    0.37 
  10  -9  -1    3.18    0.90 
  10  -9  -1    2.69    0.26 
  10  -9  -1    2.32    0.45 
 -10   9   1    1.93    0.38 
 -10   9   1    2.40    0.39 
   9  -9  -1    0.93    0.36 
   9  -9  -1    0.72    0.68 
  -9   9   1    1.10    0.31 
  -9   9   1    1.24    0.27 
  -9   9   1    0.66    0.30 
  -9   9   1    0.93    0.43 
   8  -9  -1    0.19    0.10 
   8  -9  -1    0.22    0.30 
   8  -9  -1    0.23    0.10 
   8  -9  -1   -0.03    0.56 
  -8   9   1    0.14    0.37 
  -8   9   1    0.26    0.25 
  -8   9   1    0.28    0.29 
  -8   9   1    0.42    0.24 
   7  -9  -1   52.95    1.67 
   7  -9  -1   51.57    1.71 
  -7   9   1   51.02    1.19 
  -7   9   1   52.67    1.18 
  -7   9   1   52.96    1.64 
  -7   9   1   52.76    1.75 
   6  -9  -1   25.00    1.09 
   6  -9  -1   23.55    1.11 
  -6   9   1   24.58    0.68 
  -6   9   1   25.07    1.16 
  -6   9   1   23.95    0.69 
  -6   9   1   23.80    1.17 
   5  -9  -1    0.10    0.43 
  -5   9   1    0.09    0.15 
  -5   9   1    0.20    0.15 
  -5   9   1    0.11    0.30 
  -5   9   1    0.31    0.43 
   4  -9  -1    1.46    0.53 
  -4   9   1    1.07    0.30 
  -4   9   1    1.75    0.48 
  -4   9   1    1.30    0.16 
  -4   9   1    1.34    0.17 
   3  -9  -1    1.91    0.48 
  -3   9   1    1.67    0.29 
  -3   9   1    1.83    0.24 
  -3   9   1    1.98    0.14 
  -3   9   1    1.87    0.43 
  -3   9   1    1.82    0.13 
   2  -9  -1    0.11    0.39 
  -2   9   1    0.13    0.09 
  -2   9   1    0.11    0.18 
  -2   9   1    0.07    0.24 
  -2   9   1    0.13    0.08 
  -2   9   1    0.04    0.40 
   1  -9  -1    0.05    0.41 
  -1   9   1    0.09    0.16 
  -1   9   1   -0.01    0.07 
  -1   9   1    0.06    0.35 
  -1   9   1    0.09    0.07 
   0   9   1    6.17    0.28 
   0   9   1    6.38    0.18 
   0   9   1    6.29    0.55 
   0   9   1    6.56    0.18 
  -1  -9  -1    1.65    0.18 
   1   9   1    1.80    0.17 
   1   9   1    1.69    0.17 
   1   9   1    1.83    0.18 
   1   9   1    1.86    0.45 
  -2  -9  -1    2.01    0.21 
   2   9   1    2.25    0.47 
   2   9   1    1.61    0.27 
   2   9   1    1.82    0.22 
   2   9   1    1.88    0.22 
   2   9   1    2.16    0.20 
  -3  -9  -1    0.06    0.12 
   3   9   1   -0.09    0.15 
   3   9   1    0.15    0.14 
   3   9   1    0.16    0.11 
   3   9   1    0.17    0.24 
  -4  -9  -1   10.96    0.80 
  -4  -9  -1   10.71    0.32 
  -4  -9  -1    9.58    0.30 
  -4  -9  -1   10.55    0.30 
   4   9   1   10.76    0.75 
   4   9   1   10.64    0.29 
   4   9   1   10.45    0.41 
   4   9   1   10.16    0.40 
  -5  -9  -1    2.89    0.62 
  -5  -9  -1    2.77    0.22 
  -5  -9  -1    2.81    0.28 
  -5  -9  -1    2.98    0.27 
   5   9   1    3.40    0.74 
   5   9   1    2.97    0.34 
   5   9   1    2.95    0.35 
  -6  -9  -1    0.41    0.14 
  -6  -9  -1    0.32    0.21 
  -6  -9  -1    0.29    0.25 
   6   9   1    0.33    0.28 
   6   9   1    0.15    0.24 
   6   9   1    0.29    0.24 
  -7  -9  -1    5.60    0.43 
  -7  -9  -1    5.62    0.72 
  -7  -9  -1    5.57    0.29 
   7   9   1    5.54    0.76 
   7   9   1    5.80    0.44 
   7   9   1    5.30    0.46 
  -8  -9  -1   36.41    0.98 
  -8  -9  -1   35.57    0.83 
   8   9   1   35.99    1.02 
   8   9   1   36.30    1.51 
  -9  -9  -1    7.12    0.54 
  -9  -9  -1    6.48    0.38 
   9   9   1    6.41    0.60 
   9   9   1    7.16    0.93 
 -10  -9  -1   18.55    0.73 
 -10  -9  -1   18.74    0.59 
  10   9   1   21.04    1.40 
  10   9   1   18.77    0.85 
 -11  -9  -1   22.74    0.88 
 -11  -9  -1   22.10    0.70 
  11   9   1   23.33    1.46 
  11   9   1   23.39    0.99 
 -12  -9  -1   10.21    0.75 
 -12  -9  -1   10.37    0.53 
  12   9   1    9.67    0.72 
  12   9   1   10.08    1.17 
 -13  -9  -1    1.70    0.44 
  13   9   1    1.42    0.47 
  13   9   1    1.13    0.49 
 -14  -9  -1    0.43    0.49 
  14   9   1    0.32    0.47 
  14   9   1   -0.10    0.47 
 -15  -9  -1    4.48    0.58 
  15   9   1    5.06    0.63 
  15   9   1    3.34    0.67 
 -16  -9  -1    5.38    0.65 
  16   9   1    5.18    0.72 
 -17  -9  -1    0.15    0.53 
  17   9   1   -0.04    0.57 
  17   9   1    0.43    0.55 
 -18  -9  -1    2.90    0.65 
  18   9   1    3.24    0.70 
 -19  -9  -1    0.19    0.59 
  19   9   1    0.38    0.63 
  17 -10  -1    0.60    1.09 
 -17  10   1   -0.46    0.47 
  16 -10  -1    1.21    1.09 
 -16  10   1   -0.08    0.52 
  15 -10  -1    0.46    0.97 
 -15  10   1   -0.19    0.48 
  14 -10  -1    2.68    1.01 
 -14  10   1    2.25    0.53 
  13 -10  -1    0.26    0.81 
 -13  10   1    0.85    0.43 
  12 -10  -1    4.19    0.97 
 -12  10   1    3.86    0.48 
  11 -10  -1    0.64    0.75 
 -11  10   1    0.36    0.36 
  10 -10  -1    1.76    0.75 
  10 -10  -1    1.49    0.41 
  10 -10  -1    1.35    0.13 
  10 -10  -1    1.29    0.13 
 -10  10   1    1.56    0.36 
 -10  10   1    1.05    0.34 
   9 -10  -1   23.51    1.24 
   9 -10  -1   22.99    1.27 
  -9  10   1   22.29    0.78 
  -9  10   1   22.20    1.13 
  -9  10   1   22.72    1.33 
  -9  10   1   23.68    0.77 
   8 -10  -1   24.02    1.28 
   8 -10  -1   26.81    1.22 
  -8  10   1   24.50    0.78 
  -8  10   1   25.36    0.75 
  -8  10   1   26.01    1.35 
  -8  10   1   24.76    1.18 
   7 -10  -1   28.65    1.26 
  -7  10   1   30.07    0.79 
  -7  10   1   29.35    0.82 
  -7  10   1   29.88    1.38 
   6 -10  -1    6.97    0.72 
  -6  10   1    7.21    0.77 
  -6  10   1    7.57    0.39 
  -6  10   1    7.68    0.37 
   5 -10  -1    2.03    0.63 
  -5  10   1    1.13    0.34 
  -5  10   1    1.60    0.21 
  -5  10   1    1.74    0.21 
  -5  10   1    2.14    0.62 
   4 -10  -1   11.72    0.79 
  -4  10   1   12.11    0.36 
  -4  10   1   11.79    0.35 
  -4  10   1   11.83    0.77 
  -4  10   1   11.47    0.83 
   3 -10  -1    0.42    0.49 
  -3  10   1    0.16    0.25 
  -3  10   1    0.40    0.21 
  -3  10   1    0.32    0.12 
  -3  10   1    0.74    0.44 
  -3  10   1    0.32    0.12 
   2 -10  -1    2.30    0.50 
  -2  10   1    2.35    0.44 
  -2  10   1    2.07    0.11 
  -2  10   1    2.02    0.11 
  -2  10   1    1.80    0.28 
  -2  10   1    1.74    0.21 
  -1  10   1   38.00    1.25 
  -1  10   1   36.84    0.86 
  -1  10   1   36.34    0.70 
  -1  10   1   36.07    0.70 
   0  10   1   56.22    1.72 
   0  10   1   58.03    1.71 
   0  10   1   57.19    1.15 
   0  10   1   56.61    1.13 
   0  10   1   56.78    1.26 
   1  10   1    0.06    0.11 
   1  10   1    0.04    0.21 
   1  10   1    0.12    0.12 
   1  10   1    0.07    0.14 
   1  10   1    0.03    0.37 
  -2 -10  -1   18.27    0.49 
   2  10   1   18.91    0.89 
   2  10   1   18.68    0.97 
   2  10   1   18.56    0.47 
   2  10   1   18.25    0.49 
   2  10   1   18.29    0.49 
  -3 -10  -1    1.42    0.15 
   3  10   1    1.12    0.27 
   3  10   1    1.51    0.20 
   3  10   1    1.50    0.19 
   3  10   1    1.44    0.15 
  -4 -10  -1    4.52    0.24 
  -4 -10  -1    5.11    0.21 
  -4 -10  -1    4.20    0.18 
   4  10   1    5.08    0.24 
   4  10   1    5.05    0.35 
   4  10   1    4.93    0.36 
   4  10   1    5.09    0.68 
  -5 -10  -1    1.36    0.30 
  -5 -10  -1    1.99    0.21 
  -5 -10  -1    1.83    0.19 
  -5 -10  -1    2.06    0.24 
   5  10   1    2.03    0.27 
   5  10   1    1.30    0.32 
   5  10   1    2.16    0.26 
  -6 -10  -1   11.83    0.84 
  -6 -10  -1   11.48    0.34 
  -6 -10  -1   11.90    0.43 
   6  10   1   12.28    0.91 
   6  10   1   11.81    0.52 
   6  10   1   11.78    0.50 
  -7 -10  -1    4.60    0.37 
  -7 -10  -1    4.27    0.28 
   7  10   1    4.19    0.42 
   7  10   1    4.42    0.40 
   7  10   1    4.68    0.82 
  -8 -10  -1    1.70    0.29 
  -8 -10  -1    1.94    0.22 
   8  10   1    1.47    0.32 
   8  10   1    1.51    0.37 
  -9 -10  -1    6.68    0.53 
  -9 -10  -1    6.70    0.38 
   9  10   1    7.71    1.01 
   9  10   1    6.59    0.63 
 -10 -10  -1    7.78    0.43 
 -10 -10  -1    8.07    0.54 
  10  10   1    9.22    1.19 
  10  10   1    7.97    0.63 
 -11 -10  -1    2.09    0.28 
 -11 -10  -1    1.98    0.40 
  11  10   1    1.85    0.41 
  11  10   1    1.86    0.44 
 -12 -10  -1    0.50    0.36 
 -12 -10  -1    0.58    0.25 
  12  10   1    0.56    0.44 
  12  10   1    0.41    0.46 
 -13 -10  -1   -0.33    0.40 
 -13 -10  -1   -0.02    0.27 
  13  10   1   -0.29    0.44 
  13  10   1   -0.31    0.43 
 -14 -10  -1    1.14    0.32 
 -14 -10  -1    1.21    0.50 
  14  10   1    0.86    0.53 
  14  10   1    0.74    0.51 
 -15 -10  -1    0.01    0.50 
 -15 -10  -1    0.13    0.32 
  15  10   1    0.37    0.50 
  15  10   1   -0.17    0.50 
 -16 -10  -1    3.67    0.62 
 -16 -10  -1    3.54    0.45 
  16  10   1    3.27    0.64 
 -17 -10  -1    2.40    0.45 
 -17 -10  -1    2.33    0.60 
  17  10   1    2.24    0.65 
 -18 -10  -1    2.69    0.48 
 -18 -10  -1    3.08    0.69 
  18  10   1    2.80    0.69 
  16 -11  -1    1.04    1.05 
 -16  11   1    0.18    0.53 
  15 -11  -1    0.54    0.90 
 -15  11   1   -0.07    0.49 
  14 -11  -1    1.18    0.93 
 -14  11   1    0.49    0.46 
  13 -11  -1   -0.12    0.84 
 -13  11   1   -0.22    0.40 
  12 -11  -1    0.39    0.84 
 -12  11   1   -0.04    0.39 
  11 -11  -1    0.68    0.77 
 -11  11   1    0.04    0.36 
  10 -11  -1    0.62    0.72 
  10 -11  -1    0.91    0.44 
 -10  11   1    0.50    0.48 
 -10  11   1    0.63    0.35 
 -10  11   1    0.22    0.38 
   9 -11  -1    4.18    0.82 
   9 -11  -1    3.17    0.84 
  -9  11   1    1.87    0.49 
  -9  11   1    2.64    0.36 
  -9  11   1    2.63    0.34 
   8 -11  -1    4.47    0.79 
  -8  11   1    4.67    0.43 
  -8  11   1    4.90    0.46 
   7 -11  -1    4.73    0.81 
  -7  11   1    4.54    0.37 
  -7  11   1    4.44    0.39 
   6 -11  -1    4.74    0.85 
  -6  11   1    4.58    0.89 
  -6  11   1    4.46    0.37 
  -6  11   1    4.52    0.36 
   5 -11  -1    1.46    0.58 
  -5  11   1    1.37    0.20 
  -5  11   1    1.65    0.21 
  -5  11   1    1.36    0.36 
   4 -11  -1   30.45    1.23 
  -4  11   1   30.73    0.66 
  -4  11   1   31.38    1.20 
  -4  11   1   31.27    1.27 
  -4  11   1   30.88    0.67 
   3 -11  -1    0.13    0.51 
  -3  11   1    0.24    0.31 
  -3  11   1    0.34    0.51 
  -3  11   1    0.22    0.12 
  -3  11   1    0.30    0.12 
   2 -11  -1   15.80    0.83 
  -2  11   1   15.45    0.35 
  -2  11   1   16.32    0.94 
  -2  11   1   15.65    0.35 
  -2  11   1   15.80    0.54 
  -2  11   1   16.49    0.85 
  -1  11   1    8.53    0.38 
  -1  11   1    8.46    0.23 
  -1  11   1    8.55    0.23 
  -1  11   1    9.15    0.68 
   0  11   1   28.66    0.69 
   0  11   1   29.19    1.09 
   0  11   1   28.14    0.56 
   0  11   1   28.37    0.56 
   0  11   1   29.89    1.15 
   1  11   1    9.81    0.75 
   1  11   1    9.52    0.33 
   1  11   1    9.92    0.38 
   1  11   1    9.73    0.33 
   1  11   1    9.15    0.80 
  -2 -11  -1   10.09    0.35 
   2  11   1    9.93    0.70 
   2  11   1   10.29    0.34 
   2  11   1    9.70    0.79 
   2  11   1    9.95    0.34 
   2  11   1    9.95    0.35 
  -3 -11  -1    3.50    0.25 
   3  11   1    3.35    0.24 
   3  11   1    3.70    0.30 
   3  11   1    3.48    0.63 
   3  11   1    3.57    0.71 
   3  11   1    3.48    0.30 
  -4 -11  -1    1.24    0.16 
   4  11   1    1.21    0.23 
   4  11   1    1.45    0.16 
   4  11   1    1.35    0.23 
   4  11   1    0.83    0.30 
  -5 -11  -1    2.98    0.23 
  -5 -11  -1    2.79    0.24 
   5  11   1    2.99    0.34 
   5  11   1    2.53    0.29 
  -6 -11  -1   46.86    1.03 
  -6 -11  -1   46.04    0.97 
   6  11   1   48.50    1.19 
   6  11   1   46.76    1.16 
   6  11   1   47.67    1.74 
  -7 -11  -1    0.87    0.16 
  -7 -11  -1    1.18    0.24 
   7  11   1    1.03    0.31 
   7  11   1    0.97    0.27 
   7  11   1    0.64    0.38 
  -8 -11  -1    3.22    0.30 
  -8 -11  -1    2.55    0.32 
   8  11   1    2.40    0.40 
   8  11   1    1.93    0.43 
  -9 -11  -1    9.05    0.41 
  -9 -11  -1    8.58    0.53 
   9  11   1    8.66    0.60 
   9  11   1    9.33    1.08 
 -10 -11  -1    5.25    0.37 
 -10 -11  -1    5.23    0.54 
  10  11   1    4.65    0.52 
 -11 -11  -1    0.10    0.23 
 -11 -11  -1    0.12    0.34 
  11  11   1    0.24    0.41 
  11  11   1    0.32    0.43 
 -12 -11  -1    0.72    0.26 
 -12 -11  -1    0.53    0.39 
  12  11   1    0.39    0.44 
  12  11   1    0.55    0.43 
 -13 -11  -1    0.15    0.27 
 -13 -11  -1    0.15    0.42 
  13  11   1   -0.10    0.47 
  13  11   1    0.14    0.50 
 -14 -11  -1    0.25    0.40 
 -14 -11  -1    0.51    0.30 
  14  11   1    0.43    0.49 
  14  11   1    0.00    0.49 
 -15 -11  -1   -0.06    0.47 
 -15 -11  -1    0.14    0.31 
  15  11   1   -0.46    0.55 
  15  11   1    0.06    0.51 
 -16 -11  -1   -0.13    0.32 
 -16 -11  -1   -0.35    0.44 
  16  11   1   -0.44    0.53 
  16  11   1    0.14    0.53 
 -17 -11  -1    0.36    0.37 
 -17 -11  -1    0.29    0.54 
  17  11   1    0.05    0.64 
  17  11   1   -0.68    0.57 
 -18 -11  -1    0.43    0.61 
 -18 -11  -1   -0.07    0.37 
  18  11   1   -0.77    0.61 
  18  11   1   -0.09    0.67 
  15 -12  -1    1.00    0.99 
 -15  12   1   -0.17    0.47 
  14 -12  -1    1.03    0.93 
 -14  12   1    0.03    0.44 
  13 -12  -1    1.03    0.89 
 -13  12   1    0.28    0.43 
  12 -12  -1    0.54    0.84 
 -12  12   1   -0.17    0.37 
  11 -12  -1    3.56    0.93 
 -11  12   1    2.53    0.43 
  10 -12  -1    2.37    0.83 
 -10  12   1    1.36    0.52 
 -10  12   1    1.80    0.38 
   9 -12  -1    1.53    0.81 
  -9  12   1    0.78    0.49 
  -9  12   1    1.21    0.34 
  -9  12   1    0.49    0.34 
   8 -12  -1    0.23    0.67 
  -8  12   1    0.11    0.25 
  -8  12   1    0.03    0.25 
  -8  12   1   -0.07    0.31 
  -8  12   1    0.00    0.41 
   7 -12  -1    0.43    0.63 
  -7  12   1    0.49    0.22 
  -7  12   1    0.37    0.41 
  -7  12   1    0.52    0.23 
   6 -12  -1    2.31    0.72 
  -6  12   1    1.54    0.43 
  -6  12   1    2.25    0.25 
  -6  12   1    1.99    0.25 
   5 -12  -1    6.45    0.81 
  -5  12   1    6.27    0.34 
  -5  12   1    6.54    0.34 
  -5  12   1    6.28    0.86 
   4 -12  -1    0.37    0.59 
  -4  12   1    0.46    0.15 
  -4  12   1    0.55    0.15 
  -4  12   1    0.26    0.34 
   3 -12  -1    1.71    0.55 
  -3  12   1    1.67    0.14 
  -3  12   1    1.28    0.36 
  -3  12   1    2.20    0.63 
  -3  12   1    1.80    0.15 
   2 -12  -1    0.25    0.51 
  -2  12   1    0.15    0.10 
  -2  12   1    0.21    0.11 
  -2  12   1    0.24    0.43 
  -2  12   1   -0.08    0.21 
  -2  12   1    0.28    0.31 
  -1  12   1    9.31    0.27 
  -1  12   1   10.34    0.78 
  -1  12   1    9.33    0.43 
  -1  12   1    8.82    0.80 
  -1  12   1    9.51    0.28 
   0  12   1   19.76    0.95 
   0  12   1   18.83    0.46 
   0  12   1   19.00    0.58 
   0  12   1   19.18    0.46 
   0  12   1   18.98    0.98 
   1  12   1    1.89    0.17 
   1  12   1    1.90    0.17 
   1  12   1    1.44    0.29 
   1  12   1    2.40    0.23 
   1  12   1    2.54    0.58 
  -2 -12  -1   13.81    0.42 
   2  12   1   13.77    0.43 
   2  12   1   13.90    0.42 
   2  12   1   13.91    0.41 
   2  12   1   15.10    1.12 
   2  12   1   14.39    0.92 
  -3 -12  -1    0.29    0.15 
   3  12   1    0.27    0.18 
   3  12   1    0.29    0.14 
   3  12   1    0.19    0.26 
   3  12   1    0.37    0.18 
  -4 -12  -1    2.51    0.19 
   4  12   1    1.89    0.35 
   4  12   1    2.55    0.18 
   4  12   1    2.20    0.24 
   4  12   1    2.36    0.24 
  -5 -12  -1    0.43    0.15 
   5  12   1    0.35    0.32 
   5  12   1    0.62    0.24 
   5  12   1    0.42    0.24 
  -6 -12  -1    2.70    0.21 
  -6 -12  -1    3.16    0.24 
   6  12   1    3.08    0.31 
   6  12   1    2.64    0.41 
   6  12   1    2.95    0.33 
  -7 -12  -1    8.40    0.34 
  -7 -12  -1    8.17    0.41 
   7  12   1    8.62    0.53 
   7  12   1    8.28    0.55 
   7  12   1    7.84    0.96 
  -8 -12  -1    2.58    0.28 
  -8 -12  -1    2.34    0.30 
   8  12   1    1.75    0.43 
   8  12   1    2.56    0.41 
  -9 -12  -1    6.64    0.36 
  -9 -12  -1    6.70    0.51 
   9  12   1    6.73    1.02 
   9  12   1    7.01    0.58 
 -10 -12  -1    2.91    0.38 
 -10 -12  -1    2.99    0.28 
  10  12   1    2.62    0.43 
  10  12   1    2.37    0.50 
 -11 -12  -1    6.09    0.42 
 -11 -12  -1    5.58    0.56 
  11  12   1    5.31    0.54 
 -12 -12  -1    3.38    0.34 
 -12 -12  -1    3.43    0.47 
  12  12   1    2.55    0.56 
  12  12   1    3.05    0.55 
 -13 -12  -1    2.83    0.51 
 -13 -12  -1    3.06    0.35 
  13  12   1    3.24    0.56 
  13  12   1    1.97    0.58 
 -14 -12  -1    0.73    0.30 
 -14 -12  -1    0.87    0.46 
  14  12   1    0.73    0.54 
  14  12   1    0.30    0.56 
 -15 -12  -1   -0.43    0.40 
 -15 -12  -1    0.00    0.30 
  15  12   1   -0.45    0.52 
  15  12   1   -0.07    0.51 
 -16 -12  -1    0.23    0.51 
 -16 -12  -1    0.14    0.33 
  16  12   1   -0.06    0.54 
  16  12   1   -0.24    0.57 
 -17 -12  -1    0.46    0.50 
  17  12   1    0.52    0.62 
  15 -13  -1    1.37    0.93 
 -15  13   1    0.11    0.49 
  14 -13  -1    2.61    1.02 
 -14  13   1    1.26    0.50 
  13 -13  -1    3.55    1.01 
 -13  13   1    2.35    0.48 
  12 -13  -1    6.44    1.16 
 -12  13   1    4.94    0.55 
  11 -13  -1    8.15    1.04 
 -11  13   1    7.44    0.63 
  10 -13  -1    0.41    0.70 
 -10  13   1   -0.31    0.49 
 -10  13   1    0.27    0.34 
   9 -13  -1    0.48    0.74 
  -9  13   1    0.29    0.49 
  -9  13   1    0.17    0.37 
  -9  13   1    0.54    0.31 
   8 -13  -1    0.35    0.73 
  -8  13   1    0.19    0.48 
  -8  13   1   -0.02    0.34 
  -8  13   1    0.36    0.29 
   7 -13  -1    0.02    0.63 
  -7  13   1    0.04    0.23 
  -7  13   1   -0.01    0.43 
  -7  13   1   -0.04    0.32 
   6 -13  -1    0.38    0.62 
  -6  13   1    0.52    0.20 
  -6  13   1    0.52    0.20 
  -6  13   1    0.21    0.39 
   5 -13  -1    0.56    0.63 
  -5  13   1    0.19    0.40 
  -5  13   1    0.36    0.19 
  -5  13   1    0.30    0.18 
   4 -13  -1   11.36    0.93 
  -4  13   1   11.09    0.38 
  -4  13   1   10.75    0.99 
  -4  13   1   11.09    0.38 
   3 -13  -1    0.85    0.59 
  -3  13   1    0.75    0.36 
  -3  13   1    1.06    0.14 
  -3  13   1    1.02    0.14 
  -2  13   1   15.60    0.36 
  -2  13   1   16.75    0.99 
  -2  13   1   15.55    0.37 
  -1  13   1   16.01    0.37 
  -1  13   1   15.71    0.36 
  -1  13   1   15.32    0.93 
  -1  13   1   15.89    0.54 
   0  13   1    7.07    0.30 
   0  13   1    7.52    0.40 
   0  13   1    7.25    0.75 
   0  13   1    7.60    0.29 
   1  13   1   22.38    0.60 
   1  13   1   21.53    0.54 
   1  13   1   21.37    1.12 
   1  13   1   21.47    0.54 
   2  13   1   26.32    0.66 
   2  13   1   25.95    0.65 
   2  13   1   25.71    1.20 
   2  13   1   25.57    0.66 
  -3 -13  -1    7.63    0.35 
   3  13   1    8.10    0.82 
   3  13   1    8.27    0.34 
   3  13   1    7.76    0.40 
   3  13   1    8.03    0.39 
  -4 -13  -1    2.28    0.20 
   4  13   1    2.43    0.20 
   4  13   1    2.10    0.26 
   4  13   1    1.79    0.35 
   4  13   1    2.41    0.25 
  -5 -13  -1    0.47    0.16 
   5  13   1    0.23    0.25 
   5  13   1    0.30    0.23 
   5  13   1    0.28    0.36 
  -6 -13  -1    0.27    0.15 
  -6 -13  -1    0.21    0.12 
  -6 -13  -1    0.41    0.12 
   6  13   1    0.06    0.26 
   6  13   1    0.30    0.24 
   6  13   1    0.23    0.34 
  -7 -13  -1    1.06    0.17 
  -7 -13  -1    0.86    0.18 
   7  13   1    0.78    0.31 
   7  13   1    0.90    0.38 
   7  13   1    1.26    0.52 
  -8 -13  -1    3.47    0.31 
  -8 -13  -1    3.49    0.38 
   8  13   1    2.57    0.50 
   8  13   1    3.66    0.45 
  -9 -13  -1    0.40    0.27 
  -9 -13  -1    0.52    0.20 
   9  13   1    0.21    0.41 
   9  13   1    0.40    0.35 
 -10 -13  -1    7.21    0.40 
 -10 -13  -1    7.02    0.53 
  10  13   1    7.79    1.19 
  10  13   1    6.59    0.63 
 -11 -13  -1    0.41    0.23 
 -11 -13  -1    0.44    0.34 
  11  13   1    0.53    0.43 
  11  13   1    0.38    0.52 
 -12 -13  -1    4.31    0.43 
 -12 -13  -1    4.01    0.46 
  12  13   1    2.97    0.61 
  12  13   1    4.56    0.62 
 -13 -13  -1    1.84    0.44 
 -13 -13  -1    2.00    0.32 
  13  13   1    1.41    0.51 
  13  13   1    0.89    0.60 
 -14 -13  -1    0.90    0.31 
 -14 -13  -1    1.14    0.45 
  14  13   1    0.29    0.55 
  14  13   1    0.98    0.56 
 -15 -13  -1    0.30    0.36 
 -15 -13  -1    0.52    0.47 
  15  13   1    0.51    0.60 
  15  13   1   -0.07    0.56 
 -16 -13  -1   -0.27    0.46 
  16  13   1   -0.82    0.61 
  16  13   1   -0.11    0.54 
  17  13   1   -0.71    0.59 
  17  13   1   -0.27    0.59 
  14 -14  -1    1.64    0.99 
 -14  14   1    0.20    0.47 
  13 -14  -1    2.80    1.02 
 -13  14   1    1.43    0.47 
  12 -14  -1    2.16    0.88 
 -12  14   1    1.39    0.43 
  11 -14  -1    0.73    0.79 
 -11  14   1   -0.28    0.51 
 -11  14   1    0.20    0.36 
  10 -14  -1    3.54    0.92 
 -10  14   1    2.56    0.41 
   9 -14  -1    3.62    0.96 
  -9  14   1    2.83    0.38 
   8 -14  -1   10.20    1.11 
  -8  14   1    9.16    1.20 
  -8  14   1    9.91    0.57 
   7 -14  -1    0.34    0.73 
  -7  14   1    0.65    0.26 
  -7  14   1    0.02    0.48 
   6 -14  -1    0.00    0.69 
  -6  14   1    0.20    0.22 
  -6  14   1    0.13    0.44 
   5 -14  -1    0.40    0.62 
  -5  14   1    0.21    0.42 
  -5  14   1    0.12    0.18 
  -5  14   1   -0.04    0.18 
   4 -14  -1    8.97    0.92 
  -4  14   1    8.43    0.34 
  -4  14   1    9.23    1.03 
  -4  14   1    8.13    0.34 
   3 -14  -1   -0.05    0.58 
  -3  14   1   -0.03    0.14 
  -3  14   1    0.08    0.14 
  -3  14   1   -0.15    0.37 
  -2  14   1    2.34    0.22 
  -2  14   1    1.71    0.33 
  -2  14   1    2.04    0.43 
  -2  14   1    2.21    0.20 
  -1  14   1    0.18    0.28 
  -1  14   1    0.29    0.13 
  -1  14   1    0.19    0.13 
   0  14   1    6.14    0.30 
   0  14   1    5.90    0.77 
   0  14   1    5.71    0.40 
   0  14   1    5.77    0.29 
   1  14   1    1.95    0.25 
   1  14   1    2.05    0.25 
   1  14   1    1.77    0.21 
   2  14   1   11.93    0.94 
   2  14   1   12.63    0.46 
   2  14   1   12.46    0.43 
   2  14   1   12.21    0.46 
   3  14   1    1.28    0.24 
   3  14   1    1.27    0.21 
   3  14   1    0.69    0.34 
   3  14   1    1.11    0.24 
  -4 -14  -1    1.67    0.20 
   4  14   1    1.64    0.19 
   4  14   1    1.53    0.24 
   4  14   1    1.20    0.38 
   4  14   1    1.51    0.25 
  -5 -14  -1    4.17    0.29 
   5  14   1    3.85    0.35 
   5  14   1    4.65    0.43 
   5  14   1    3.32    0.45 
  -6 -14  -1    0.19    0.17 
   6  14   1    0.21    0.36 
   6  14   1    0.27    0.27 
   6  14   1    0.26    0.30 
  -7 -14  -1   27.40    0.66 
  -7 -14  -1   27.69    0.60 
   7  14   1   28.63    0.94 
   7  14   1   28.66    1.52 
  -8 -14  -1    9.06    0.42 
  -8 -14  -1    8.52    0.37 
   8  14   1    9.66    0.66 
   8  14   1    8.38    1.11 
  -9 -14  -1    0.66    0.25 
  -9 -14  -1    0.65    0.20 
   9  14   1    0.41    0.38 
   9  14   1    0.45    0.43 
 -10 -14  -1    2.66    0.35 
 -10 -14  -1    2.90    0.27 
  10  14   1    2.55    0.48 
  10  14   1    1.84    0.52 
 -11 -14  -1    4.80    0.40 
 -11 -14  -1    4.98    0.54 
  11  14   1    5.51    0.68 
 -12 -14  -1    0.23    0.37 
 -12 -14  -1    0.27    0.24 
  12  14   1   -0.32    0.47 
  12  14   1    0.52    0.51 
 -13 -14  -1    2.92    0.73 
 -13 -14  -1    2.55    0.43 
  13  14   1    2.57    0.56 
  14  14   1    0.93    0.58 
  14  14   1   -0.07    0.59 
  15  14   1    2.08    0.67 
  15  14   1    0.65    0.60 
  16  14   1    0.24    0.64 
  16  14   1   -0.71    0.59 
  13 -15  -1    1.22    0.91 
 -13  15   1   -0.07    0.43 
  12 -15  -1    3.13    1.01 
 -12  15   1    1.53    0.43 
  11 -15  -1    9.18    1.22 
 -11  15   1    7.05    1.33 
 -11  15   1    7.71    0.70 
 -10  15   1    2.87    0.63 
 -10  15   1    4.10    0.45 
   9 -15  -1    0.64    0.81 
  -9  15   1    0.05    0.31 
  -9  15   1   -0.45    0.51 
   8 -15  -1    0.86    0.81 
  -8  15   1   -0.36    0.47 
  -8  15   1    0.26    0.29 
   7 -15  -1    0.29    0.75 
  -7  15   1   -0.10    0.24 
  -7  15   1   -0.42    0.48 
   6 -15  -1    1.32    0.80 
  -6  15   1    0.53    0.47 
  -6  15   1    0.97    0.24 
   5 -15  -1   20.19    1.25 
  -5  15   1   20.70    0.60 
  -5  15   1   19.68    1.36 
   4 -15  -1    3.97    0.79 
  -4  15   1    2.68    0.53 
  -4  15   1    3.27    0.29 
  -4  15   1    2.88    0.30 
  -3  15   1    4.42    0.26 
  -3  15   1    4.03    0.26 
  -3  15   1    3.30    0.51 
  -2  15   1    1.67    0.43 
  -2  15   1    1.51    0.34 
  -2  15   1    2.23    0.23 
  -2  15   1    2.10    0.23 
  -1  15   1    0.37    0.29 
  -1  15   1    0.54    0.14 
  -1  15   1    0.47    0.14 
   0  15   1    0.15    0.27 
   0  15   1    0.43    0.15 
   0  15   1    0.43    0.26 
   0  15   1    0.34    0.15 
   1  15   1    5.66    0.38 
   1  15   1    5.64    0.34 
   1  15   1    5.68    0.89 
   1  15   1    5.70    0.34 
   2  15   1    7.45    0.36 
   2  15   1    7.27    0.38 
   2  15   1    6.98    0.37 
   2  15   1    7.17    0.36 
   2  15   1    7.71    0.93 
   3  15   1    1.52    0.25 
   3  15   1    1.14    0.34 
   3  15   1    1.59    0.24 
   3  15   1    1.40    0.21 
  -4 -15  -1    1.01    0.21 
   4  15   1    0.94    0.41 
   4  15   1    1.22    0.26 
   4  15   1    1.08    0.27 
   4  15   1    0.93    0.19 
  -5 -15  -1   -0.11    0.17 
   5  15   1    0.11    0.28 
   5  15   1    0.11    0.28 
   5  15   1    0.07    0.40 
  -6 -15  -1    4.58    0.31 
   6  15   1    3.71    0.53 
   6  15   1    5.28    0.50 
  -7 -15  -1    8.73    0.37 
   7  15   1    9.54    0.63 
   7  15   1    9.13    1.25 
  -8 -15  -1    2.52    0.23 
   8  15   1    1.85    0.47 
   8  15   1    2.27    0.42 
  -9 -15  -1    0.48    0.19 
   9  15   1    0.40    0.46 
   9  15   1    0.30    0.41 
 -10 -15  -1    0.63    0.22 
  10  15   1    0.68    0.46 
  10  15   1    0.30    0.47 
 -11 -15  -1    0.02    0.33 
  11  15   1   -0.49    0.45 
  11  15   1    0.23    0.42 
  12  15   1    0.31    0.55 
  12  15   1    1.25    0.52 
  13  15   1    4.41    0.63 
  13  15   1    3.09    0.68 
  14  15   1    4.27    0.70 
  15  15   1    1.07    0.64 
  15  15   1    0.02    0.58 
  12 -16  -1    1.60    0.95 
 -12  16   1    0.20    0.40 
  11 -16  -1    1.35    0.90 
 -11  16   1   -0.43    0.54 
 -11  16   1   -0.03    0.35 
 -10  16   1    3.15    0.43 
   9 -16  -1    6.17    1.08 
  -9  16   1    4.08    0.42 
   8 -16  -1    0.81    0.75 
  -8  16   1    0.27    0.51 
  -8  16   1    0.53    0.28 
   7 -16  -1    5.53    0.98 
  -7  16   1    4.38    0.34 
  -7  16   1    3.70    0.61 
   6 -16  -1   11.69    1.10 
  -6  16   1   11.21    1.28 
  -6  16   1   10.19    0.49 
   5 -16  -1   19.93    1.31 
  -5  16   1   18.64    1.45 
  -5  16   1   18.69    0.62 
  -4  16   1    9.15    0.39 
  -4  16   1    9.65    1.20 
  -3  16   1    0.30    0.34 
  -3  16   1    0.35    0.46 
  -3  16   1    0.38    0.17 
  -2  16   1   24.55    0.54 
  -2  16   1   25.38    1.24 
  -2  16   1   24.74    1.40 
  -2  16   1   24.66    0.61 
  -1  16   1    0.86    0.18 
  -1  16   1    0.37    0.44 
  -1  16   1    0.80    0.18 
  -1  16   1    0.60    0.36 
   0  16   1    4.36    0.31 
   0  16   1    4.64    0.33 
   1  16   1    4.29    0.33 
   1  16   1    3.33    0.44 
   1  16   1    4.57    0.38 
   1  16   1    3.97    0.34 
   2  16   1    1.90    0.41 
   2  16   1    2.48    0.32 
   2  16   1    2.46    0.26 
   3  16   1   11.12    0.52 
   3  16   1   11.18    1.06 
   4  16   1    0.47    0.41 
   4  16   1    0.76    0.28 
  -5 -16  -1   -0.10    0.18 
   5  16   1    0.00    0.37 
   5  16   1   -0.12    0.28 
  -6 -16  -1    1.41    0.20 
   6  16   1    0.90    0.43 
   6  16   1    1.47    0.34 
  -7 -16  -1    0.88    0.19 
   7  16   1    0.21    0.42 
   7  16   1    0.59    0.35 
  -8 -16  -1   -0.08    0.16 
   8  16   1    0.36    0.39 
   8  16   1   -0.29    0.45 
   9  16   1    0.20    0.45 
   9  16   1    0.30    0.39 
  10  16   1   -0.12    0.46 
  10  16   1   -0.24    0.41 
  11  16   1    0.33    0.48 
  11  16   1   -0.01    0.50 
  12  16   1    0.71    0.63 
  12  16   1    1.60    0.51 
  13  16   1    0.76    0.59 
  13  16   1    1.89    0.61 
  14  16   1   -0.25    0.56 
  14  16   1   -0.57    0.56 
  15  16   1    0.79    0.58 
  15  16   1    0.01    0.61 
  11 -17  -1    3.54    1.01 
 -11  17   1    2.61    0.43 
  10 -17  -1    2.79    0.97 
 -10  17   1    1.53    0.39 
   9 -17  -1    1.48    0.84 
  -9  17   1    0.33    0.31 
  -9  17   1   -0.66    0.53 
   8 -17  -1    4.84    1.02 
  -8  17   1    2.56    0.65 
  -8  17   1    3.56    0.38 
   7 -17  -1    0.57    0.74 
  -7  17   1   -0.18    0.24 
  -7  17   1   -0.34    0.51 
   6 -17  -1    0.55    0.77 
  -6  17   1    0.27    0.53 
  -6  17   1    0.21    0.24 
  -5  17   1    0.38    0.49 
  -5  17   1    0.55    0.21 
  -4  17   1    1.02    0.38 
  -4  17   1    1.26    0.50 
  -4  17   1    1.69    0.23 
  -3  17   1    3.98    0.30 
  -3  17   1    4.49    0.88 
  -3  17   1    3.07    0.60 
  -2  17   1    6.82    1.14 
  -2  17   1    6.45    0.94 
  -2  17   1    6.47    0.33 
  -1  17   1   -0.13    0.44 
  -1  17   1    0.11    0.34 
  -1  17   1    0.06    0.16 
   0  17   1    5.98    0.34 
   0  17   1    6.58    0.97 
   1  17   1    2.69    0.45 
   2  17   1    0.16    0.23 
   2  17   1    0.24    0.38 
   3  17   1    4.32    0.42 
   3  17   1    3.33    0.51 
   4  17   1    9.31    0.53 
   4  17   1    8.94    1.16 
   5  17   1   -0.17    0.38 
   5  17   1   -0.18    0.28 
   6  17   1   -0.11    0.40 
   6  17   1    0.17    0.32 
   7  17   1   -0.25    0.46 
   7  17   1    0.21    0.34 
   8  17   1    3.43    0.60 
   9  17   1    2.33    0.61 
   9  17   1    3.23    0.50 
  10  17   1   -0.18    0.44 
  10  17   1   -0.35    0.47 
  11  17   1   -0.11    0.42 
  11  17   1   -0.34    0.49 
  12  17   1   -0.68    0.55 
  12  17   1   -0.12    0.51 
  13  17   1    0.64    0.55 
  13  17   1   -0.26    0.53 
  14  17   1    0.33    0.62 
  14  17   1    1.59    0.59 
  10 -18  -1    3.05    1.01 
 -10  18   1    0.62    0.67 
 -10  18   1    1.43    0.38 
   9 -18  -1    2.22    0.94 
  -9  18   1    1.00    0.34 
   8 -18  -1    1.38    0.85 
  -8  18   1    0.28    0.28 
  -8  18   1   -0.10    0.56 
   7 -18  -1    1.00    0.82 
  -7  18   1   -0.44    0.53 
  -7  18   1    0.21    0.25 
   6 -18  -1    5.24    0.97 
  -6  18   1    3.58    0.64 
  -6  18   1    4.41    0.39 
  -5  18   1    0.76    0.22 
  -5  18   1    0.33    0.52 
  -5  18   1    0.63    0.34 
  -4  18   1    2.53    0.42 
  -4  18   1    2.50    0.58 
  -4  18   1    3.16    0.31 
  -3  18   1    0.06    0.48 
  -3  18   1    0.29    0.34 
  -3  18   1    0.30    0.17 
  -2  18   1    0.12    0.34 
  -2  18   1    0.34    0.48 
  -2  18   1   -0.01    0.16 
  -1  18   1    0.87    0.20 
  -1  18   1    0.48    0.36 
  -1  18   1    0.71    0.47 
   0  18   1    0.59    0.21 
   0  18   1    0.46    0.39 
   1  18   1    2.08    0.47 
   2  18   1   10.91    0.52 
   2  18   1   11.76    1.22 
   3  18   1   11.99    1.26 
   3  18   1   11.26    0.56 
   4  18   1    6.72    1.19 
   4  18   1    7.32    0.55 
   5  18   1    0.01    0.30 
   5  18   1   -0.10    0.40 
   6  18   1   -0.12    0.44 
   6  18   1   -0.16    0.32 
   7  18   1    0.36    0.43 
   7  18   1    0.68    0.37 
   8  18   1    1.52    0.44 
   8  18   1    0.85    0.53 
   9  18   1    0.29    0.43 
   9  18   1    0.03    0.48 
  10  18   1    3.26    0.64 
  11  18   1    0.76    0.64 
  11  18   1    1.83    0.54 
  12  18   1    0.08    0.51 
  13  18   1    0.16    0.55 
  13  18   1   -0.71    0.54 
   9 -19  -1    1.68    0.92 
  -9  19   1   -0.57    0.80 
   8 -19  -1    2.66    0.91 
  -8  19   1    0.36    0.62 
   7 -19  -1    0.81    0.76 
  -7  19   1   -0.45    0.55 
  -6  19   1    0.58    0.58 
  -5  19   1   -0.09    0.52 
  -5  19   1    0.10    0.33 
  -4  19   1    0.55    0.52 
  -4  19   1    0.45    0.35 
  -3  19   1    1.37    0.55 
  -3  19   1    1.52    0.40 
  -2  19   1    0.29    0.17 
  -2  19   1    0.41    0.51 
  -2  19   1    0.22    0.34 
  -1  19   1    0.61    0.21 
  -1  19   1    0.47    0.45 
  -1  19   1    0.25    0.38 
   0  19   1    0.64    0.40 
   0  19   1    0.89    0.23 
   1  19   1    8.18    1.11 
   1  19   1    7.31    0.43 
   2  19   1    6.74    1.11 
   2  19   1    6.56    0.45 
   3  19   1    2.58    0.34 
   3  19   1    1.66    0.45 
   4  19   1    1.66    0.50 
   4  19   1    1.93    0.33 
   5  19   1    0.25    0.41 
   5  19   1    0.62    0.32 
   6  19   1    1.75    0.39 
   6  19   1    1.51    0.53 
   7  19   1    1.59    0.53 
   7  19   1    2.12    0.44 
   8  19   1    3.63    0.64 
   9  19   1   10.05    0.80 
   9  19   1    9.77    1.57 
  10  19   1    3.39    0.58 
  10  19   1    2.05    0.69 
  11  19   1    0.75    0.53 
  11  19   1    0.16    0.57 
  -7  20   1   -0.03    0.61 
  -6  20   1   -0.67    0.53 
  -5  20   1   -0.39    0.53 
  -4  20   1    0.15    0.42 
  -4  20   1   -0.05    0.53 
  -3  20   1    0.47    0.52 
  -3  20   1    0.52    0.38 
  -2  20   1    3.41    0.48 
  -2  20   1    3.56    0.64 
  -1  20   1    0.52    0.51 
  -1  20   1    0.09    0.37 
   0  20   1    0.06    0.38 
   0  20   1    0.21    0.24 
   0  20   1    0.07    0.42 
   1  20   1    1.10    0.43 
   1  20   1    1.50    0.25 
   2  20   1    0.96    0.27 
   2  20   1    0.60    0.43 
   3  20   1    1.03    0.30 
   3  20   1    0.58    0.45 
   4  20   1    1.17    0.34 
   4  20   1    0.50    0.47 
   5  20   1    0.17    0.43 
   5  20   1    0.59    0.34 
   6  20   1   -0.05    0.49 
   6  20   1   -0.05    0.35 
   7  20   1    0.25    0.39 
   7  20   1    0.00    0.51 
   8  20   1    0.43    0.42 
   8  20   1   -0.01    0.49 
   9  20   1    0.36    0.46 
   9  20   1   -0.15    0.52 
  10  20   1    2.14    0.54 
  10  20   1    0.79    0.58 
  -5  21   1   -0.72    0.54 
  -4  21   1    0.39    0.58 
  -3  21   1    0.21    0.51 
  -2  21   1    0.36    0.43 
  -2  21   1    0.38    0.55 
  -1  21   1    3.00    0.53 
   0  21   1    0.24    0.42 
   0  21   1    0.44    0.52 
   1  21   1    0.09    0.41 
   2  21   1    2.06    0.32 
   3  21   1   -0.28    0.43 
   3  21   1    0.62    0.29 
   4  21   1    0.30    0.32 
   4  21   1   -0.24    0.42 
   5  21   1   -0.14    0.48 
   5  21   1    0.33    0.35 
   6  21   1   -0.27    0.50 
   6  21   1    0.30    0.37 
   7  21   1   -0.18    0.51 
   7  21   1    0.57    0.40 
   8  21   1    0.47    0.44 
   8  21   1   -0.30    0.53 
  -2  22   1    1.20    0.61 
  -1  22   1    0.68    0.55 
   0  22   1    0.39    0.49 
   0  22   1   -0.03    0.43 
   1  22   1   -0.08    0.44 
   2  22   1    2.15    0.53 
   3  22   1   -0.36    0.45 
   4  22   1   -0.33    0.49 
   4  22   1    0.44    0.33 
   5  21  -2   -0.34    0.48 
   5  21  -2    0.56    0.38 
   4  21  -2   -0.04    0.44 
   4  21  -2    1.19    0.36 
   3  21  -2    0.83    0.32 
   3  21  -2   -0.02    0.44 
   2  21  -2   -0.11    0.42 
   1  21  -2   -0.18    0.43 
   0  21  -2    0.77    0.54 
  -1  21  -2    1.92    0.65 
  -2  21  -2    2.27    0.64 
  -3  21  -2   -0.08    0.60 
  -4  21  -2    0.63    0.65 
  -5  21  -2    0.22    0.66 
   8  20  -2    1.28    0.49 
   8  20  -2    0.01    0.56 
   7  20  -2    0.20    0.42 
   7  20  -2   -0.63    0.51 
   6  20  -2    0.57    0.52 
   6  20  -2    1.60    0.43 
   5  20  -2    1.97    0.53 
   4  20  -2   -0.21    0.43 
   4  20  -2    0.11    0.33 
   3  20  -2    1.79    0.50 
   3  20  -2    2.73    0.36 
   2  20  -2    0.85    0.44 
   2  20  -2    1.64    0.31 
   1  20  -2    0.40    0.29 
   1  20  -2   -0.24    0.37 
   0  20  -2    0.44    0.38 
   0  20  -2    0.86    0.50 
  -1  20  -2    0.83    0.41 
  -1  20  -2    1.28    0.58 
  -2  20  -2    0.55    0.53 
  -3  20  -2    0.58    0.59 
  -4  20  -2    0.02    0.60 
  -5  20  -2   -0.06    0.62 
  -6  20  -2   -0.45    0.62 
  -7  20  -2   -0.60    0.63 
   9  19  -2    0.97    0.50 
   9  19  -2   -0.09    0.56 
   8  19  -2    0.06    0.49 
   8  19  -2    0.84    0.44 
   7  19  -2   -0.10    0.45 
   7  19  -2    0.17    0.42 
   6  19  -2    0.21    0.38 
   6  19  -2    0.19    0.45 
   5  19  -2    1.71    0.53 
   5  19  -2    2.91    0.43 
   4  19  -2    2.18    0.53 
   4  19  -2    3.36    0.41 
   3  19  -2    0.89    0.44 
   3  19  -2    1.78    0.34 
  -3 -19   2    1.63    0.34 
   2  19  -2    0.61    0.28 
   2  19  -2    0.26    0.40 
  -2 -19   2    0.39    0.32 
   1  19  -2    0.96    0.24 
   1  19  -2    0.55    0.39 
   0  19  -2    0.30    0.37 
   0  19  -2    0.72    0.21 
  -1  19  -2    1.25    0.53 
  -1  19  -2    0.79    0.38 
  -2  19  -2    0.32    0.34 
  -2  19  -2    0.68    0.53 
  -3  19  -2    0.09    0.50 
  -3  19  -2    0.09    0.40 
  -4  19  -2   -0.07    0.52 
  -5  19  -2    1.57    0.59 
  -6  19  -2   -0.30    0.53 
  -7  19  -2   -0.48    0.58 
  -8  19  -2   -0.84    0.63 
  -9  19  -2   -0.68    0.65 
  11  18  -2   -0.19    0.53 
  10  18  -2    1.22    0.52 
  10  18  -2    0.19    0.59 
   9  18  -2    2.70    0.54 
   8  18  -2    1.92    0.47 
   8  18  -2    1.31    0.59 
   7  18  -2    1.06    0.53 
   7  18  -2    1.61    0.44 
   6  18  -2    5.20    0.63 
   5  18  -2    4.84    0.47 
  -5 -18   2    5.17    0.48 
   4  18  -2    0.92    0.46 
   4  18  -2    1.27    0.34 
  -4 -18   2    1.04    0.31 
   3  18  -2    1.07    0.31 
   3  18  -2    0.43    0.42 
  -3 -18   2    0.75    0.31 
   2  18  -2    3.74    0.43 
  -2 -18   2    3.49    0.39 
   1  18  -2    4.50    0.38 
  -1 -18   2    4.80    0.43 
   0  18  -2    1.80    0.23 
   0  18  -2    1.27    0.40 
  -1  18  -2    3.81    0.45 
  -1  18  -2    4.01    0.61 
  -2  18  -2   14.81    1.09 
  -2  18  -2   15.05    1.40 
  -3  18  -2   13.40    1.06 
  -3  18  -2   13.49    1.40 
  -4  18  -2    1.43    0.57 
  -4  18  -2    1.21    0.34 
  -5  18  -2   -0.01    0.55 
  -6  18  -2   -0.32    0.56 
  -7  18  -2   -0.10    0.53 
  -8  18  -2   -0.39    0.61 
  -9  18  -2   -0.46    0.64 
  12  17  -2    0.05    0.56 
  11  17  -2    0.17    0.50 
  11  17  -2   -0.13    0.54 
  10  17  -2    0.04    0.48 
  10  17  -2   -0.32    0.52 
   9  17  -2    0.70    0.46 
   9  17  -2    0.16    0.49 
   8  17  -2    0.57    0.45 
   8  17  -2    0.18    0.47 
  -8 -17   2    0.47    0.42 
   7  17  -2    0.37    0.39 
   7  17  -2   -0.17    0.42 
  -7 -17   2    0.02    0.24 
   6  17  -2   -0.15    0.40 
   6  17  -2    0.02    0.34 
  -6 -17   2    0.11    0.25 
   5  17  -2    0.37    0.41 
   5  17  -2    0.89    0.34 
  -5 -17   2    0.68    0.27 
   4  17  -2    3.91    0.37 
  -4 -17   2    3.95    0.36 
   3  17  -2    8.93    1.09 
   3  17  -2    9.43    0.53 
  -3 -17   2    9.36    0.54 
   2  17  -2    1.73    0.28 
  -2 -17   2    1.78    0.34 
   1  17  -2    0.08    0.35 
   1  17  -2    0.41    0.22 
  -1 -17   2    0.23    0.31 
   0  17  -2    0.56    0.18 
   0  17  -2    0.17    0.34 
   0 -17   2    0.51    0.32 
  -1  17  -2    0.32    0.33 
  -1  17  -2    0.66    0.15 
  -2  17  -2    0.63    0.46 
  -2  17  -2    0.82    0.11 
  -2  17  -2    0.40    0.31 
  -3  17  -2    0.46    0.48 
  -3  17  -2    0.31    0.30 
  -4  17  -2    0.07    0.27 
  -4  17  -2   -0.07    0.53 
  -5  17  -2    2.02    0.58 
  -5  17  -2    2.76    0.24 
  -5  17  -2    2.16    0.34 
  -6  17  -2    0.96    0.17 
  -6  17  -2    0.69    0.31 
  -6  17  -2    0.33    0.58 
  -7  17  -2    7.44    0.39 
  -7  17  -2    7.45    1.27 
  -8  17  -2    0.22    0.63 
  -8  17  -2    0.97    0.25 
   8 -17   2    1.60    0.72 
  -9  17  -2    0.49    0.26 
  -9  17  -2   -0.55    0.62 
   9 -17   2    1.13    0.73 
 -10  17  -2   -0.48    0.61 
 -10  17  -2    0.50    0.29 
  10 -17   2    1.18    0.73 
 -11  17  -2   -0.03    0.63 
 -11  17  -2    0.40    0.33 
 -12  17  -2   -0.21    0.33 
  13  16  -2    0.19    0.58 
  12  16  -2   -0.33    0.52 
  12  16  -2   -0.62    0.53 
  11  16  -2    0.32    0.53 
  11  16  -2   -0.48    0.50 
  10  16  -2    0.46    0.52 
  10  16  -2    0.89    0.50 
 -10 -16   2    1.24    0.46 
   9  16  -2   -0.34    0.41 
   9  16  -2   -0.30    0.45 
  -9 -16   2   -0.03    0.26 
   8  16  -2    0.84    0.48 
   8  16  -2    1.44    0.44 
  -8 -16   2    1.58    0.31 
   7  16  -2    0.36    0.37 
   7  16  -2    0.01    0.43 
  -7 -16   2    0.06    0.25 
   6  16  -2   -0.35    0.37 
   6  16  -2   -0.12    0.32 
  -6 -16   2   -0.08    0.24 
   5  16  -2   -0.26    0.40 
   5  16  -2   -0.17    0.31 
  -5 -16   2    0.02    0.24 
   4  16  -2    1.12    0.31 
   4  16  -2    0.65    0.41 
  -4 -16   2    1.37    0.30 
   3  16  -2   -0.06    0.35 
   3  16  -2   -0.10    0.25 
  -3 -16   2    0.04    0.25 
   2  16  -2    6.90    0.97 
   2  16  -2    6.64    0.43 
  -2 -16   2    6.81    0.51 
   1  16  -2    0.25    0.34 
   1  16  -2    0.46    0.21 
  -1 -16   2    0.61    0.32 
   0  16  -2    4.64    0.30 
   0 -16   2    4.75    0.43 
  -1  16  -2    1.70    0.21 
  -1  16  -2    1.50    0.19 
  -2  16  -2    7.90    0.88 
  -2  16  -2    8.16    1.11 
  -3  16  -2    6.48    0.80 
  -3  16  -2    7.34    1.27 
  -4  16  -2    0.44    0.50 
  -4  16  -2    0.58    0.29 
  -5  16  -2    2.71    0.35 
  -5  16  -2    3.03    0.67 
  -6  16  -2    4.74    0.72 
  -6  16  -2    4.32    0.30 
  -6  16  -2    3.56    0.68 
  -7  16  -2    0.48    0.51 
  -7  16  -2    0.88    0.27 
  -7  16  -2    1.40    0.22 
   7 -16   2    1.61    0.67 
  -8  16  -2   -0.62    0.56 
  -8  16  -2    0.17    0.23 
   8 -16   2    0.29    0.65 
  -9  16  -2    0.87    0.29 
  -9  16  -2    0.48    0.59 
   9 -16   2    1.58    0.74 
 -10  16  -2    3.28    0.75 
 -10  16  -2    4.81    0.52 
 -11  16  -2    2.20    0.74 
 -11  16  -2    3.66    0.42 
 -12  16  -2   -0.61    0.65 
 -12  16  -2    0.23    0.34 
  12 -16   2    1.35    0.81 
 -13  16  -2    0.00    0.37 
  14  15  -2    0.80    0.63 
  14  15  -2   -0.34    0.61 
  13  15  -2    1.00    0.62 
  13  15  -2    2.10    0.64 
  12  15  -2    0.78    0.52 
  12  15  -2   -0.07    0.54 
 -12 -15   2    0.51    0.46 
  11  15  -2    0.85    0.54 
  11  15  -2    1.60    0.53 
 -11 -15   2    1.89    0.35 
  10  15  -2    2.55    0.54 
  10  15  -2    1.88    0.57 
 -10 -15   2    2.85    0.36 
   9  15  -2    2.05    0.49 
  -9 -15   2    2.23    0.34 
   8  15  -2    2.30    0.53 
   8  15  -2    3.05    0.49 
  -8 -15   2    3.59    0.37 
   7  15  -2    0.49    0.42 
   7  15  -2    0.54    0.38 
  -7 -15   2    0.70    0.26 
   6  15  -2    0.51    0.35 
   6  15  -2    0.29    0.43 
  -6 -15   2    0.69    0.26 
   5  15  -2    0.75    0.32 
   5  15  -2    0.47    0.42 
  -5 -15   2    0.66    0.26 
   4  15  -2   -0.13    0.27 
   4  15  -2    0.11    0.34 
  -4 -15   2    0.09    0.24 
   3  15  -2    0.02    0.24 
   3  15  -2   -0.07    0.34 
  -3 -15   2   -0.09    0.24 
   2  15  -2   -0.02    0.21 
   2  15  -2    0.03    0.33 
   2  15  -2   -0.09    0.20 
  -2 -15   2    0.15    0.25 
   1  15  -2    0.07    0.17 
   1  15  -2   -0.12    0.17 
   1  15  -2    0.13    0.31 
  -1 -15   2    0.05    0.27 
   0  15  -2    0.94    0.16 
   0  15  -2    0.90    0.16 
   0  15  -2    0.44    0.31 
   0 -15   2    0.68    0.29 
  -1  15  -2    7.80    0.92 
  -1  15  -2    7.55    0.28 
  -1  15  -2    7.49    0.28 
  -1  15  -2    7.00    0.82 
   1 -15   2    7.57    0.57 
  -2  15  -2   16.02    1.29 
  -2  15  -2   15.59    1.01 
  -2  15  -2   17.01    0.95 
  -3  15  -2    5.76    0.66 
  -3  15  -2    5.58    0.78 
  -4  15  -2   13.24    0.92 
  -4  15  -2   13.85    1.41 
  -4  15  -2   14.03    0.99 
  -5  15  -2    0.09    0.24 
  -5  15  -2    0.07    0.51 
  -5  15  -2    0.33    0.12 
  -5  15  -2    0.31    0.12 
  -6  15  -2    5.27    0.70 
  -6  15  -2    5.06    0.31 
  -6  15  -2    3.76    0.65 
  -7  15  -2    0.37    0.21 
  -7  15  -2    0.20    0.51 
  -7  15  -2    0.29    0.25 
   7 -15   2    0.43    0.63 
  -8  15  -2    0.98    0.25 
  -8  15  -2    0.04    0.52 
   8 -15   2    1.37    0.68 
  -9  15  -2    8.00    0.53 
   9 -15   2    8.49    0.99 
 -10  15  -2    7.02    1.33 
 -10  15  -2    7.78    0.59 
  10 -15   2    8.63    1.00 
 -11  15  -2    0.82    0.36 
 -11  15  -2   -0.22    0.61 
  11 -15   2    1.66    0.77 
 -12  15  -2   -0.13    0.34 
 -12  15  -2   -0.48    0.63 
  12 -15   2    0.92    0.72 
 -13  15  -2    0.45    0.38 
 -13  15  -2   -0.28    0.64 
  13 -15   2    1.67    0.82 
 -14  15  -2    0.27    0.42 
  14 -15   2    1.49    0.83 
  15  14  -2    1.40    0.63 
  15  14  -2    0.36    0.65 
  14  14  -2    1.11    0.70 
  14  14  -2    2.85    0.63 
  13  14  -2    0.62    0.57 
  13  14  -2    0.01    0.62 
 -13 -14   2    1.25    0.35 
  12  14  -2   -0.18    0.46 
  12  14  -2   -0.54    0.55 
 -12 -14   2    0.14    0.30 
  11  14  -2   -0.01    0.53 
  11  14  -2    0.97    0.47 
 -11 -14   2    0.90    0.31 
  10  14  -2    0.07    0.44 
  10  14  -2   -0.30    0.50 
 -10 -14   2   -0.05    0.27 
   9  14  -2    0.04    0.43 
   9  14  -2   -0.02    0.48 
  -9 -14   2    0.34    0.27 
   8  14  -2    0.00    0.42 
   8  14  -2    0.49    0.41 
  -8 -14   2    0.36    0.26 
   7  14  -2    0.76    0.43 
   7  14  -2    1.39    0.40 
  -7 -14   2    1.74    0.32 
   6  14  -2    0.49    0.43 
   6  14  -2    1.03    0.35 
  -6 -14   2    1.04    0.28 
   5  14  -2    4.56    0.54 
   5  14  -2    4.96    0.53 
  -5 -14   2    4.75    0.43 
   4  14  -2    4.91    0.43 
   4  14  -2    5.57    0.95 
   4  14  -2    5.45    0.47 
  -4 -14   2    4.97    0.43 
   3  14  -2   -0.09    0.21 
   3  14  -2    0.02    0.29 
   3  14  -2    0.05    0.23 
  -3 -14   2   -0.15    0.23 
   2  14  -2    4.38    0.34 
   2  14  -2    3.35    0.40 
   2  14  -2    4.01    0.34 
  -2 -14   2    4.09    0.35 
   1  14  -2    3.08    0.29 
   1  14  -2    3.71    0.83 
   1  14  -2    2.90    0.30 
  -1 -14   2    2.72    0.34 
   0  14  -2    1.95    0.34 
   0  14  -2    2.73    0.23 
   0  14  -2    2.64    0.23 
   0  14  -2    3.31    0.58 
   0 -14   2    2.52    0.34 
  -1  14  -2    0.31    0.10 
  -1  14  -2    0.26    0.26 
  -1  14  -2    0.73    0.44 
  -1  14  -2    0.34    0.10 
   1 -14   2    0.33    0.27 
  -2  14  -2    1.38    0.28 
  -2  14  -2    1.30    0.43 
   2 -14   2    1.80    0.33 
  -3  14  -2    6.89    0.69 
  -3  14  -2    6.79    0.96 
  -3  14  -2    7.37    0.67 
  -4  14  -2    0.03    0.23 
  -4  14  -2    0.39    0.48 
  -4  14  -2   -0.05    0.44 
  -5  14  -2    2.95    0.31 
  -5  14  -2    2.98    0.58 
  -5  14  -2    3.97    0.20 
  -5  14  -2    4.53    0.70 
  -6  14  -2    2.73    0.59 
  -6  14  -2    4.14    0.82 
  -6  14  -2    3.48    0.25 
  -6  14  -2    3.53    0.27 
  -6  14  -2    2.75    0.29 
   6 -14   2    4.45    0.71 
  -7  14  -2    1.95    0.59 
  -7  14  -2    2.66    0.24 
   7 -14   2    3.17    0.72 
  -8  14  -2    0.88    0.59 
  -8  14  -2    1.58    0.27 
   8 -14   2    2.01    0.72 
  -9  14  -2    5.78    0.49 
  -9  14  -2    4.46    0.71 
   9 -14   2    6.47    0.89 
 -10  14  -2    4.85    0.53 
  10 -14   2    6.09    0.94 
 -11  14  -2    3.47    0.68 
 -11  14  -2    4.55    0.44 
 -12  14  -2    2.05    0.41 
 -12  14  -2    1.07    0.64 
  12 -14   2    3.67    0.87 
 -13  14  -2   -0.28    0.61 
 -13  14  -2    0.71    0.40 
  13 -14   2    2.00    0.80 
 -14  14  -2    0.08    0.41 
  14 -14   2    1.01    0.77 
 -15  14  -2    0.08    0.42 
  15 -14   2    1.05    0.83 
  15  13  -2    0.08    0.59 
  15  13  -2   -0.59    0.59 
 -15 -13   2    0.55    0.38 
  14  13  -2    0.31    0.59 
  14  13  -2   -0.45    0.56 
 -14 -13   2    0.07    0.34 
  13  13  -2    2.24    0.63 
 -13 -13   2    2.68    0.42 
  12  13  -2    0.05    0.46 
  12  13  -2   -0.30    0.51 
 -12 -13   2    0.25    0.31 
 -12 -13   2    0.06    0.38 
  11  13  -2   -0.15    0.42 
  11  13  -2   -0.38    0.46 
 -11 -13   2   -0.04    0.32 
 -11 -13   2    0.07    0.29 
  10  13  -2    0.07    0.48 
  10  13  -2    0.22    0.45 
 -10 -13   2    0.42    0.28 
 -10 -13   2    0.10    0.31 
   9  13  -2    0.85    0.47 
   9  13  -2    1.14    0.46 
  -9 -13   2    1.12    0.30 
  -9 -13   2    1.06    0.32 
   8  13  -2    7.15    0.66 
  -8 -13   2    7.37    0.45 
  -8 -13   2    6.78    0.47 
   7  13  -2    0.35    0.35 
   7  13  -2    0.05    0.38 
  -7 -13   2    0.44    0.21 
  -7 -13   2    0.11    0.24 
   6  13  -2    0.58    0.31 
   6  13  -2    0.47    0.37 
   6  13  -2    0.80    0.29 
  -6 -13   2    0.65    0.14 
  -6 -13   2    0.58    0.25 
  -6 -13   2    0.87    0.18 
   5  13  -2    1.49    0.32 
   5  13  -2    1.28    0.42 
   5  13  -2    1.36    0.29 
  -5 -13   2    1.22    0.27 
   4  13  -2    0.64    0.24 
   4  13  -2    0.51    0.26 
   4  13  -2    0.54    0.34 
   4  13  -2    0.74    0.24 
  -4 -13   2    0.47    0.24 
   3  13  -2    0.83    0.30 
   3  13  -2    0.84    0.24 
   3  13  -2    1.23    0.24 
   3  13  -2    0.85    0.22 
  -3 -13   2    0.79    0.24 
   2  13  -2    7.90    0.44 
   2  13  -2    8.09    0.73 
   2  13  -2    7.89    0.40 
   2  13  -2    7.76    0.85 
   2  13  -2    7.82    0.41 
  -2 -13   2    7.56    0.47 
   1  13  -2   34.32    0.80 
   1  13  -2   35.04    1.38 
   1  13  -2   33.84    0.79 
   1  13  -2   34.53    1.29 
  -1 -13   2   34.39    0.94 
   0  13  -2   21.03    0.51 
   0  13  -2   21.99    0.99 
   0  13  -2   22.58    1.11 
   0  13  -2   20.97    0.51 
   0 -13   2   21.40    0.72 
  -1  13  -2    0.07    0.08 
  -1  13  -2    0.15    0.25 
  -1  13  -2    0.10    0.40 
   1 -13   2   -0.10    0.27 
  -2  13  -2    4.30    0.58 
  -2  13  -2    4.47    0.65 
   2 -13   2    3.97    0.43 
  -3  13  -2   10.59    0.74 
  -3  13  -2   10.25    1.04 
  -3  13  -2   10.32    0.74 
  -4  13  -2   -0.14    0.38 
  -4  13  -2    0.00    0.21 
  -4  13  -2    0.14    0.45 
  -5  13  -2    0.37    0.49 
  -5  13  -2    0.30    0.12 
  -5  13  -2    0.03    0.43 
  -5  13  -2    0.13    0.21 
  -5  13  -2    0.16    0.11 
   5 -13   2    0.46    0.49 
  -6  13  -2    0.18    0.14 
  -6  13  -2    0.16    0.43 
  -6  13  -2    0.09    0.14 
  -6  13  -2    0.39    0.51 
   6 -13   2    0.40    0.52 
  -7  13  -2    0.60    0.67 
  -7  13  -2   -0.05    0.44 
  -7  13  -2    0.24    0.19 
  -7  13  -2    0.15    0.17 
   7 -13   2    0.22    0.55 
  -8  13  -2    0.45    0.25 
  -8  13  -2    0.59    0.48 
  -8  13  -2    1.17    0.24 
   8 -13   2    1.23    0.63 
  -9  13  -2   15.76    1.21 
  -9  13  -2   16.38    1.40 
  -9  13  -2   16.30    0.63 
   9 -13   2   17.20    1.10 
 -10  13  -2    0.05    0.29 
 -10  13  -2   -0.21    0.57 
  10 -13   2    0.71    0.68 
 -11  13  -2   -0.05    0.53 
 -11  13  -2    0.44    0.32 
  11 -13   2    0.76    0.67 
 -12  13  -2    2.07    0.67 
 -12  13  -2    2.74    0.43 
 -13  13  -2   -0.47    0.58 
 -13  13  -2    0.16    0.39 
  13 -13   2    1.19    0.74 
 -14  13  -2    0.15    0.41 
  14 -13   2    1.33    0.78 
 -15  13  -2    0.10    0.44 
  15 -13   2    1.20    0.83 
  16  12  -2    1.58    0.68 
 -16 -12   2    1.51    0.45 
 -16 -12   2    1.55    0.64 
  15  12  -2   -0.18    0.54 
 -15 -12   2   -0.05    0.47 
 -15 -12   2    0.01    0.38 
  14  12  -2   -0.40    0.55 
  14  12  -2   -0.56    0.59 
 -14 -12   2    0.46    0.45 
 -14 -12   2    0.10    0.34 
  13  12  -2    0.08    0.48 
  13  12  -2   -0.37    0.50 
 -13 -12   2    0.37    0.34 
 -13 -12   2    0.08    0.41 
  12  12  -2    1.22    0.55 
  12  12  -2    2.52    0.55 
 -12 -12   2    2.04    0.38 
 -12 -12   2    2.16    0.45 
  11  12  -2    2.71    0.52 
  11  12  -2    2.09    0.53 
 -11 -12   2    2.95    0.36 
 -11 -12   2    3.00    0.42 
  10  12  -2    0.78    0.52 
  10  12  -2    1.25    0.48 
 -10 -12   2    1.39    0.33 
 -10 -12   2    1.26    0.35 
   9  12  -2    0.86    0.43 
   9  12  -2    1.07    0.43 
  -9 -12   2    0.75    0.30 
  -9 -12   2    1.07    0.27 
   8  12  -2    1.22    0.40 
   8  12  -2    0.74    0.42 
  -8 -12   2    1.29    0.28 
  -8 -12   2    1.29    0.29 
   7  12  -2   24.25    1.40 
   7  12  -2   24.27    0.88 
  -7 -12   2   24.20    0.74 
  -7 -12   2   25.36    0.71 
   6  12  -2    1.85    0.30 
   6  12  -2    1.57    0.33 
   6  12  -2    1.45    0.38 
  -6 -12   2    1.35    0.26 
  -6 -12   2    1.58    0.19 
   5  12  -2    1.16    0.34 
   5  12  -2    1.29    0.29 
   5  12  -2    1.53    0.28 
  -5 -12   2    1.65    0.15 
  -5 -12   2    1.46    0.25 
  -5 -12   2    1.71    0.14 
   4  12  -2    5.41    0.42 
   4  12  -2    4.93    0.43 
   4  12  -2    5.11    0.38 
   4  12  -2    5.46    0.78 
  -4 -12   2    4.93    0.40 
  -4 -12   2    6.06    0.89 
   3  12  -2   23.13    0.65 
   3  12  -2   22.93    0.64 
   3  12  -2   23.36    0.65 
   3  12  -2   22.82    1.08 
  -3 -12   2   23.30    1.07 
  -3 -12   2   22.77    0.65 
   2  12  -2   15.68    0.51 
   2  12  -2   15.66    0.49 
   2  12  -2   15.65    0.47 
   2  12  -2   15.70    0.94 
  -2 -12   2   15.76    0.54 
   1  12  -2    0.35    0.16 
   1  12  -2    0.22    0.26 
   1  12  -2    0.32    0.46 
   1  12  -2    0.35    0.15 
   1  12  -2    0.70    0.23 
  -1 -12   2    0.58    0.24 
   0  12  -2    1.92    0.51 
   0  12  -2    1.11    0.30 
   0  12  -2    1.79    0.29 
   0  12  -2    1.54    0.19 
   0  12  -2    1.62    0.20 
   0 -12   2    1.34    0.28 
  -1  12  -2   64.00    1.79 
  -1  12  -2   63.98    1.72 
   1 -12   2   63.23    1.46 
  -2  12  -2   32.77    1.10 
  -2  12  -2   33.11    1.15 
  -2  12  -2   33.17    1.44 
   2 -12   2   32.74    0.92 
  -3  12  -2   14.15    1.14 
  -3  12  -2   14.19    0.76 
  -3  12  -2   14.12    0.76 
  -4  12  -2    1.33    0.23 
  -4  12  -2    1.70    0.51 
  -4  12  -2    1.08    0.43 
  -5  12  -2   23.88    0.49 
  -5  12  -2   24.44    1.01 
  -5  12  -2   24.65    1.32 
  -5  12  -2   24.81    0.92 
  -5  12  -2   23.95    0.50 
   5 -12   2   24.28    1.03 
  -6  12  -2    6.18    0.29 
  -6  12  -2    5.84    0.72 
  -6  12  -2    5.90    0.31 
   6 -12   2    5.75    0.72 
  -7  12  -2    0.33    0.17 
  -7  12  -2    0.26    0.51 
  -7  12  -2    0.27    0.18 
  -7  12  -2    0.40    0.43 
   7 -12   2    0.23    0.51 
  -8  12  -2    0.11    0.24 
  -8  12  -2    0.21    0.22 
  -8  12  -2    0.35    0.46 
  -8  12  -2    0.29    0.19 
   8 -12   2    0.45    0.54 
  -9  12  -2   13.67    1.31 
  -9  12  -2   13.03    0.56 
  -9  12  -2   12.64    0.81 
   9 -12   2   13.71    1.02 
 -10  12  -2    2.17    0.33 
 -10  12  -2    2.43    0.60 
 -10  12  -2    3.22    0.37 
 -11  12  -2    0.28    0.59 
 -11  12  -2    1.17    0.36 
  11 -12   2    1.65    0.76 
 -12  12  -2   -0.08    0.34 
 -12  12  -2   -0.42    0.56 
  12 -12   2    0.46    0.68 
 -13  12  -2   -0.30    0.59 
 -13  12  -2    0.03    0.38 
  13 -12   2    0.80    0.73 
 -14  12  -2   -0.23    0.39 
  14 -12   2    0.72    0.74 
 -15  12  -2    0.16    0.43 
  15 -12   2    1.19    0.85 
 -16  12  -2    0.81    0.50 
  16 -12   2    1.48    0.91 
  16  11  -2    0.14    0.59 
  16  11  -2   -0.45    0.61 
 -16 -11   2    0.22    0.53 
 -16 -11   2    0.13    0.41 
  15  11  -2    0.51    0.62 
  15  11  -2   -0.23    0.56 
 -15 -11   2    0.38    0.40 
 -15 -11   2    0.22    0.51 
  14  11  -2    0.67    0.53 
  14  11  -2    0.20    0.54 
 -14 -11   2    0.89    0.50 
 -14 -11   2    0.87    0.39 
  13  11  -2    0.09    0.48 
  13  11  -2   -0.17    0.50 
 -13 -11   2    0.25    0.34 
 -13 -11   2    0.13    0.39 
  12  11  -2    0.34    0.49 
  12  11  -2    0.89    0.53 
 -12 -11   2    0.59    0.43 
 -12 -11   2    0.77    0.34 
  11  11  -2    1.59    0.51 
  11  11  -2    1.14    0.50 
 -11 -11   2    1.58    0.34 
 -11 -11   2    1.75    0.43 
  10  11  -2    4.26    0.50 
  10  11  -2    3.57    0.54 
 -10 -11   2    4.08    0.43 
 -10 -11   2    4.60    0.39 
   9  11  -2    0.02    0.36 
   9  11  -2   -0.07    0.41 
  -9 -11   2    0.05    0.31 
  -9 -11   2    0.21    0.27 
   8  11  -2    0.24    0.33 
   8  11  -2    0.26    0.40 
  -8 -11   2    0.43    0.26 
  -8 -11   2    0.49    0.27 
   7  11  -2    8.94    0.61 
   7  11  -2    9.48    1.11 
  -7 -11   2    8.76    0.46 
  -7 -11   2    9.39    0.49 
   6  11  -2    4.82    0.44 
   6  11  -2    4.54    0.49 
  -6 -11   2    4.13    0.38 
  -6 -11   2    4.76    0.34 
   5  11  -2    0.13    0.22 
   5  11  -2    0.17    0.29 
   5  11  -2    0.05    0.25 
  -5 -11   2   -0.11    0.19 
  -5 -11   2    0.15    0.09 
  -5 -11   2    0.15    0.14 
   4  11  -2    2.70    0.27 
   4  11  -2    2.83    0.25 
   4  11  -2    2.17    0.35 
   4  11  -2    2.33    0.28 
  -4 -11   2    2.66    0.26 
  -4 -11   2    2.08    0.31 
   3  11  -2    3.41    0.31 
   3  11  -2    3.24    0.26 
   3  11  -2    3.59    0.30 
   3  11  -2    2.73    0.34 
  -3 -11   2    2.92    0.34 
  -3 -11   2    3.56    0.32 
   2  11  -2    8.79    0.40 
   2  11  -2    8.83    0.35 
   2  11  -2    8.17    0.74 
   2  11  -2    8.48    0.36 
  -2 -11   2    8.25    0.40 
  -2 -11   2    8.73    0.67 
   1  11  -2   29.31    1.07 
   1  11  -2   29.49    0.67 
   1  11  -2   30.09    0.67 
   1  11  -2   30.17    0.77 
   1  11  -2   28.62    1.13 
  -1 -11   2   29.44    0.79 
   0  11  -2   31.88    1.10 
   0  11  -2   32.32    0.82 
   0  11  -2   31.80    1.14 
   0  11  -2   31.07    0.64 
   0  11  -2   31.44    0.65 
   0 -11   2   32.07    0.85 
  -1  11  -2    9.24    0.63 
  -1  11  -2    9.46    0.70 
  -1  11  -2    9.49    0.44 
   1 -11   2    9.40    0.48 
  -2  11  -2    8.50    0.62 
  -2  11  -2    8.56    0.64 
   2 -11   2    8.40    0.50 
  -3  11  -2   27.20    0.97 
  -3  11  -2   26.75    1.33 
  -3  11  -2   28.10    0.97 
   3 -11   2   27.64    0.81 
  -4  11  -2    9.22    0.67 
  -4  11  -2    8.78    0.62 
  -4  11  -2    8.73    1.02 
   4 -11   2    9.19    0.69 
  -5  11  -2    0.49    0.40 
  -5  11  -2    0.56    0.11 
  -5  11  -2    0.48    0.44 
  -5  11  -2    0.64    0.12 
   5 -11   2    0.64    0.46 
  -6  11  -2   24.36    1.01 
  -6  11  -2   24.32    0.56 
  -6  11  -2   25.64    1.42 
  -6  11  -2   24.26    0.59 
   6 -11   2   24.08    1.03 
  -7  11  -2   56.13    1.65 
  -7  11  -2   54.44    1.12 
  -7  11  -2   56.66    1.99 
  -7  11  -2   53.57    1.15 
   7 -11   2   55.45    1.66 
  -8  11  -2    6.16    0.71 
  -8  11  -2    6.56    0.41 
  -8  11  -2    6.80    0.37 
  -8  11  -2    5.85    0.62 
  -8  11  -2    5.23    0.62 
   8 -11   2    6.59    0.69 
  -9  11  -2    6.40    0.65 
  -9  11  -2    7.15    0.46 
  -9  11  -2    7.22    0.41 
   9 -11   2    7.26    0.79 
 -10  11  -2    0.04    0.24 
 -10  11  -2    0.14    0.28 
 -10  11  -2    0.19    0.53 
  10 -11   2    0.63    0.61 
 -11  11  -2    2.12    0.39 
  11 -11   2    2.60    0.80 
 -12  11  -2    0.38    0.53 
 -12  11  -2    1.04    0.39 
  12 -11   2    1.81    0.80 
 -13  11  -2    0.58    0.39 
  13 -11   2    0.71    0.74 
 -14  11  -2    0.37    0.40 
  14 -11   2    1.04    0.82 
 -15  11  -2    0.72    0.44 
  15 -11   2    1.65    0.91 
 -16  11  -2   -0.27    0.43 
  16 -11   2    0.59    0.84 
 -17  11  -2    0.21    0.50 
  17 -11   2    1.07    1.01 
  17  10  -2   -0.44    0.64 
  17  10  -2    0.46    0.72 
 -17 -10   2    0.32    0.46 
 -17 -10   2    0.26    0.54 
  16  10  -2    0.84    0.68 
  16  10  -2    2.15    0.68 
 -16 -10   2    2.83    0.67 
 -16 -10   2    2.00    0.50 
  15  10  -2    3.14    0.64 
  15  10  -2    1.99    0.66 
 -15 -10   2    2.83    0.61 
 -15 -10   2    3.30    0.48 
  14  10  -2    1.32    0.59 
  14  10  -2    0.71    0.56 
 -14 -10   2    1.40    0.40 
 -14 -10   2    1.28    0.51 
  13  10  -2    7.46    1.35 
  13  10  -2    8.67    0.82 
 -13 -10   2    7.87    0.79 
 -13 -10   2    8.56    0.64 
  12  10  -2    6.03    0.61 
 -12 -10   2    6.97    0.55 
 -12 -10   2    6.58    0.63 
  11  10  -2    3.15    0.58 
  11  10  -2    3.54    0.53 
 -11 -10   2    4.13    0.52 
 -11 -10   2    3.88    0.43 
  10  10  -2    2.96    0.52 
  10  10  -2    4.01    0.53 
 -10 -10   2    3.68    0.39 
 -10 -10   2    3.71    0.45 
   9  10  -2    3.36    0.48 
   9  10  -2    2.34    0.49 
  -9 -10   2    3.33    0.40 
  -9 -10   2    3.37    0.36 
   8  10  -2    5.02    0.62 
   8  10  -2    5.03    0.96 
  -8 -10   2    4.14    0.43 
  -8 -10   2    4.77    0.48 
   7  10  -2    0.76    0.35 
   7  10  -2    0.98    0.34 
  -7 -10   2    0.38    0.24 
  -7 -10   2    1.09    0.25 
   6  10  -2    0.09    0.24 
   6  10  -2    0.10    0.27 
   6  10  -2    0.16    0.32 
  -6 -10   2   -0.02    0.20 
  -6 -10   2    0.00    0.21 
   5  10  -2    5.12    0.39 
   5  10  -2    4.90    0.42 
   5  10  -2    5.63    0.74 
  -5 -10   2    5.38    0.67 
  -5 -10   2    5.31    0.31 
  -5 -10   2    4.84    0.34 
   4  10  -2    7.39    0.72 
   4  10  -2    7.53    0.36 
   4  10  -2    6.87    0.39 
   4  10  -2    7.40    0.39 
  -4 -10   2    7.02    0.36 
  -4 -10   2    7.00    0.68 
  -4 -10   2    7.48    0.25 
   3  10  -2    0.10    0.17 
   3  10  -2   -0.03    0.22 
   3  10  -2    0.05    0.15 
   3  10  -2    0.04    0.18 
  -3 -10   2   -0.05    0.17 
  -3 -10   2    0.03    0.20 
   2  10  -2    0.93    0.25 
   2  10  -2    1.32    0.19 
   2  10  -2    1.32    0.17 
   2  10  -2    1.29    0.20 
  -2 -10   2    1.13    0.24 
  -2 -10   2    1.22    0.21 
   1  10  -2   -0.03    0.21 
   1  10  -2    0.10    0.13 
   1  10  -2    0.10    0.17 
   1  10  -2    0.06    0.12 
  -1 -10   2    0.10    0.19 
   0  10  -2    8.87    0.21 
   0  10  -2    8.58    0.53 
   0  10  -2    8.53    0.59 
   0  10  -2    8.86    0.21 
   0  10  -2    8.88    0.35 
   0 -10   2    8.84    0.38 
  -1  10  -2   13.16    0.69 
  -1  10  -2   13.53    0.52 
  -1  10  -2   12.68    0.70 
   1 -10   2   13.34    0.55 
  -2  10  -2   57.58    1.50 
  -2  10  -2   58.92    1.51 
  -2  10  -2   58.69    1.30 
   2 -10   2   58.65    1.34 
  -3  10  -2   10.03    0.58 
  -3  10  -2    9.39    0.86 
  -3  10  -2    9.55    0.59 
   3 -10   2   10.05    0.53 
  -4  10  -2   22.29    1.10 
  -4  10  -2   22.39    0.81 
   4 -10   2   22.02    0.81 
  -5  10  -2    0.31    0.41 
  -5  10  -2    0.24    0.12 
  -5  10  -2    0.30    0.11 
  -5  10  -2    0.13    0.37 
   5 -10   2    0.07    0.39 
  -6  10  -2   12.17    0.37 
  -6  10  -2   11.67    0.38 
  -6  10  -2   10.72    0.97 
  -6  10  -2   12.38    0.40 
  -6  10  -2   11.15    0.72 
   6 -10   2   11.50    0.72 
  -7  10  -2    8.25    0.78 
  -7  10  -2    9.84    1.15 
  -7  10  -2    8.86    0.39 
  -7  10  -2    8.85    0.43 
  -7  10  -2    8.86    0.68 
   7 -10   2    8.61    0.72 
  -8  10  -2    5.83    0.62 
  -8  10  -2    6.52    1.01 
  -8  10  -2    5.88    0.43 
  -8  10  -2    5.73    0.36 
  -8  10  -2    6.03    0.72 
   8 -10   2    6.90    0.81 
   8 -10   2    6.79    0.72 
  -9  10  -2    0.20    0.24 
  -9  10  -2    0.33    0.22 
  -9  10  -2   -0.02    0.21 
  -9  10  -2    0.00    0.48 
   9 -10   2    0.16    0.52 
 -10  10  -2    5.76    0.51 
 -10  10  -2    5.39    0.63 
 -10  10  -2    6.28    0.45 
 -10  10  -2    4.72    0.61 
  10 -10   2    6.46    0.82 
 -11  10  -2   -0.24    0.23 
 -11  10  -2   -0.18    0.52 
 -11  10  -2    0.08    0.33 
  11 -10   2    0.28    0.66 
 -12  10  -2    4.57    0.58 
 -12  10  -2    2.88    0.36 
 -12  10  -2    3.34    0.64 
 -13  10  -2    2.26    0.45 
  13 -10   2    2.72    0.91 
 -14  10  -2    5.94    0.58 
  14 -10   2    7.18    1.16 
 -15  10  -2    1.32    0.47 
  15 -10   2    2.40    1.01 
 -16  10  -2    0.07    0.45 
  16 -10   2    0.77    0.87 
 -17  10  -2   -0.27    0.49 
  17 -10   2    0.71    0.98 
  17   9  -2    1.54    1.25 
  17   9  -2    0.11    0.64 
  17   9  -2    1.18    0.65 
 -17  -9   2    0.91    0.47 
 -17  -9   2    1.25    0.64 
  16   9  -2    0.10    0.61 
  16   9  -2    0.54    0.66 
 -16  -9   2    0.50    0.53 
 -16  -9   2    0.37    0.43 
  15   9  -2    1.32    0.57 
  15   9  -2    0.95    0.61 
 -15  -9   2    1.88    0.61 
 -15  -9   2    1.54    0.43 
  14   9  -2   -0.27    0.51 
  14   9  -2    0.15    0.51 
 -14  -9   2    0.15    0.36 
 -14  -9   2    0.33    0.50 
  13   9  -2    0.57    0.51 
  13   9  -2    0.79    0.48 
 -13  -9   2    1.06    0.38 
 -13  -9   2    0.57    0.46 
  12   9  -2    0.43    0.53 
  12   9  -2    0.79    0.46 
 -12  -9   2    0.79    0.46 
 -12  -9   2    0.93    0.37 
  11   9  -2    0.70    0.44 
  11   9  -2    0.29    0.43 
 -11  -9   2    0.48    0.34 
 -11  -9   2    0.92    0.40 
  10   9  -2   13.41    1.29 
  10   9  -2   13.66    0.81 
 -10  -9   2   12.87    0.65 
 -10  -9   2   13.58    0.78 
   9   9  -2    6.01    0.59 
   9   9  -2    6.18    1.01 
  -9  -9   2    5.52    0.47 
  -9  -9   2    6.04    0.51 
   8   9  -2    2.62    0.41 
   8   9  -2    2.24    0.43 
  -8  -9   2    2.91    0.35 
  -8  -9   2    2.86    0.34 
   7   9  -2    0.02    0.29 
   7   9  -2   -0.01    0.34 
  -7  -9   2   -0.39    0.21 
  -7  -9   2   -0.08    0.24 
   6   9  -2   31.40    0.85 
   6   9  -2   31.56    0.88 
   6   9  -2   31.84    1.33 
  -6  -9   2   31.37    0.79 
  -6  -9   2   33.21    1.42 
  -6  -9   2   31.12    0.78 
   5   9  -2   27.97    0.79 
   5   9  -2   29.13    0.80 
   5   9  -2   29.42    1.23 
  -5  -9   2   29.50    1.25 
  -5  -9   2   28.21    0.70 
  -5  -9   2   28.49    0.73 
   4   9  -2   11.35    0.47 
   4   9  -2   11.65    0.43 
   4   9  -2   11.39    0.80 
   4   9  -2   11.40    0.46 
  -4  -9   2   10.95    0.43 
  -4  -9   2   11.63    0.78 
  -4  -9   2   11.70    0.36 
  -4  -9   2   11.24    0.37 
   3   9  -2    5.44    0.32 
   3   9  -2    5.42    0.34 
   3   9  -2    5.15    0.33 
   3   9  -2    5.32    0.60 
  -3  -9   2    5.00    0.33 
  -3  -9   2    5.28    0.17 
  -3  -9   2    5.33    0.17 
  -3  -9   2    5.24    0.58 
   2   9  -2    8.89    0.34 
   2   9  -2    8.88    0.36 
   2   9  -2    9.12    0.65 
   2   9  -2    8.81    0.35 
  -2  -9   2    9.45    0.70 
  -2  -9   2    8.70    0.38 
   1   9  -2    3.14    0.28 
   1   9  -2    3.37    0.22 
   1   9  -2    3.39    0.22 
  -1  -9   2    3.29    0.31 
  -1  -9   2    3.38    0.51 
   0   9  -2    3.49    0.44 
   0   9  -2    3.31    0.29 
   0   9  -2    3.35    0.48 
   0   9  -2    3.49    0.15 
   0   9  -2    3.56    0.15 
   0  -9   2    3.27    0.27 
  -1   9  -2    1.44    0.20 
  -1   9  -2    1.85    0.23 
  -1   9  -2    2.20    0.37 
   1  -9   2    1.79    0.24 
  -2   9  -2    0.54    0.16 
  -2   9  -2    0.64    0.21 
  -2   9  -2    0.77    0.33 
   2  -9   2    0.55    0.24 
  -3   9  -2    9.35    0.53 
  -3   9  -2    8.74    0.76 
  -3   9  -2    9.45    0.53 
  -3   9  -2    9.30    0.41 
   3  -9   2    9.20    0.46 
   3  -9   2    9.48    0.54 
  -4   9  -2   13.73    0.28 
  -4   9  -2   13.66    0.27 
  -4   9  -2   13.75    0.66 
  -4   9  -2   13.71    0.92 
   4  -9   2   13.72    0.67 
  -5   9  -2    2.57    0.21 
  -5   9  -2    2.58    0.50 
  -5   9  -2    1.79    0.39 
  -5   9  -2    2.66    0.20 
   5  -9   2    2.64    0.47 
  -6   9  -2    0.06    0.14 
  -6   9  -2    0.15    0.37 
  -6   9  -2    0.10    0.14 
  -6   9  -2    0.13    0.40 
   6  -9   2    0.27    0.37 
  -7   9  -2   27.22    0.72 
  -7   9  -2   26.84    0.93 
  -7   9  -2   27.32    1.42 
  -7   9  -2   27.24    1.08 
  -7   9  -2   27.54    0.68 
   7  -9   2   27.50    1.10 
   7  -9   2   27.26    1.22 
  -8   9  -2   56.34    1.97 
  -8   9  -2   56.07    1.26 
  -8   9  -2   55.56    1.48 
  -8   9  -2   55.61    1.66 
  -8   9  -2   56.54    1.22 
   8  -9   2   57.88    1.94 
   8  -9   2   56.45    1.69 
  -9   9  -2   18.65    0.66 
  -9   9  -2   18.68    0.61 
  -9   9  -2   18.83    0.83 
  -9   9  -2   19.88    1.40 
   9  -9   2   20.36    1.21 
   9  -9   2   19.52    1.03 
 -10   9  -2    1.72    0.26 
 -10   9  -2    2.56    0.30 
 -10   9  -2    2.03    0.51 
 -10   9  -2    2.32    0.33 
  10  -9   2    2.86    0.71 
 -11   9  -2    0.06    0.49 
 -11   9  -2   -0.02    0.23 
 -11   9  -2   -0.03    0.30 
 -11   9  -2    0.36    0.28 
  11  -9   2    0.20    0.65 
 -12   9  -2   15.78    0.93 
 -12   9  -2   16.77    0.80 
  12  -9   2   16.07    0.49 
  12  -9   2   16.84    1.19 
 -13   9  -2   -0.23    0.26 
 -13   9  -2    0.11    0.38 
  13  -9   2    0.18    0.79 
 -14   9  -2    0.01    0.41 
  14  -9   2   -0.15    0.75 
 -15   9  -2    0.12    0.44 
  15  -9   2    0.38    0.91 
 -16   9  -2    0.70    0.45 
  16  -9   2    1.34    0.93 
 -17   9  -2    0.91    0.51 
  17  -9   2    0.83    0.93 
 -18   9  -2    0.17    0.52 
  18  -9   2    1.00    1.08 
  18   8  -2   -0.69    0.63 
  18   8  -2    0.16    1.21 
  18   8  -2   -0.29    0.69 
 -18  -8   2   -0.01    0.63 
 -18  -8   2   -0.11    0.48 
  17   8  -2   -0.79    0.58 
  17   8  -2   -0.31    0.58 
  17   8  -2   -0.08    1.14 
 -17  -8   2   -0.14    0.43 
 -17  -8   2    0.07    0.61 
  16   8  -2    2.73    0.66 
 -16  -8   2    2.49    0.51 
 -16  -8   2    2.31    0.61 
  15   8  -2    1.82    0.69 
  15   8  -2    2.75    0.69 
 -15  -8   2    1.94    0.63 
 -15  -8   2    2.06    0.49 
  14   8  -2   -0.21    0.48 
  14   8  -2    0.38    0.51 
 -14  -8   2    0.27    0.50 
 -14  -8   2   -0.02    0.36 
  13   8  -2    0.77    0.48 
  13   8  -2    0.09    0.47 
 -13  -8   2    0.44    0.43 
 -13  -8   2    0.65    0.39 
  12   8  -2   11.70    1.35 
  12   8  -2   12.10    0.91 
 -12  -8   2   11.76    0.70 
 -12  -8   2   11.52    0.77 
  11   8  -2   40.50    1.25 
  11   8  -2   40.66    1.85 
 -11  -8   2   41.74    1.26 
 -11  -8   2   39.01    1.05 
  10   8  -2    8.13    0.67 
  10   8  -2    9.54    1.14 
 -10  -8   2    8.19    0.52 
 -10  -8   2    8.47    0.62 
   9   8  -2    8.15    0.59 
   9   8  -2    8.76    1.02 
  -9  -8   2    8.00    0.53 
  -9  -8   2    8.14    0.50 
   8   8  -2   31.29    1.43 
   8   8  -2   31.49    0.98 
  -8  -8   2   30.52    0.83 
  -8  -8   2   31.36    0.93 
   7   8  -2   12.19    0.63 
   7   8  -2   12.23    0.98 
  -7  -8   2   11.96    0.55 
  -7  -8   2   11.96    0.49 
   6   8  -2    1.40    0.33 
   6   8  -2    1.77    0.28 
   6   8  -2    1.57    0.26 
  -6  -8   2    1.36    0.28 
  -6  -8   2    1.67    0.25 
  -6  -8   2    1.79    0.24 
   5   8  -2    4.26    0.43 
   5   8  -2    4.74    0.39 
   5   8  -2    5.09    0.72 
  -5  -8   2    4.30    0.36 
  -5  -8   2    4.47    0.37 
  -5  -8   2    4.19    0.65 
   4   8  -2   55.51    1.26 
   4   8  -2   53.39    1.19 
   4   8  -2   53.72    1.25 
   4   8  -2   53.87    1.70 
  -4  -8   2   53.66    1.67 
  -4  -8   2   53.61    1.16 
  -4  -8   2   54.08    1.17 
  -4  -8   2   52.25    1.19 
   3   8  -2   35.76    0.76 
   3   8  -2   35.46    0.74 
   3   8  -2   35.58    0.76 
   3   8  -2   35.21    1.12 
  -3  -8   2   34.98    0.74 
  -3  -8   2   35.86    1.15 
  -3  -8   2   36.29    0.66 
   2   8  -2   11.80    0.40 
   2   8  -2   12.49    0.73 
   2   8  -2   11.49    0.38 
   2   8  -2   11.72    0.38 
  -2  -8   2   12.34    0.72 
  -2  -8   2   11.73    0.42 
   1   8  -2   15.16    0.39 
   1   8  -2   15.45    0.46 
   1   8  -2   15.05    0.39 
   1   8  -2   15.29    0.73 
  -1  -8   2   15.06    0.73 
  -1  -8   2   15.23    0.48 
   0   8  -2   36.77    0.97 
   0   8  -2   36.48    0.64 
   0   8  -2   36.60    1.03 
   0   8  -2   37.02    0.79 
   0   8  -2   36.73    0.64 
   0  -8   2   35.85    0.80 
  -1   8  -2    1.99    0.24 
  -1   8  -2    2.02    0.40 
  -1   8  -2    1.75    0.37 
   1  -8   2    2.07    0.28 
  -2   8  -2    1.32    0.20 
  -2   8  -2    1.26    0.31 
   2  -8   2    1.01    0.20 
  -3   8  -2   11.95    0.53 
  -3   8  -2   11.95    0.55 
  -3   8  -2   12.01    0.44 
  -3   8  -2   11.62    0.80 
   3  -8   2   11.71    0.55 
   3  -8   2   11.78    0.46 
  -4   8  -2    0.09    0.07 
  -4   8  -2    0.17    0.32 
  -4   8  -2    0.11    0.07 
  -4   8  -2    0.17    0.23 
  -4   8  -2    0.08    0.31 
   4  -8   2    0.02    0.32 
  -5   8  -2    0.18    0.11 
  -5   8  -2    0.19    0.12 
  -5   8  -2    0.04    0.29 
  -5   8  -2    0.13    0.35 
   5  -8   2    0.21    0.33 
  -6   8  -2    2.76    0.21 
  -6   8  -2    2.58    0.42 
  -6   8  -2    3.25    0.49 
  -6   8  -2    3.03    0.24 
   6  -8   2    3.29    0.48 
   6  -8   2    2.34    0.32 
  -7   8  -2    0.70    0.36 
  -7   8  -2    0.85    0.19 
  -7   8  -2    1.06    0.18 
  -7   8  -2    1.23    0.44 
  -7   8  -2    1.20    0.21 
   7  -8   2    1.23    0.45 
   7  -8   2    0.93    0.32 
  -8   8  -2    0.18    0.18 
  -8   8  -2    0.36    0.19 
  -8   8  -2    0.43    0.42 
  -8   8  -2    0.24    0.44 
  -8   8  -2    0.21    0.20 
   8  -8   2    0.39    0.30 
   8  -8   2    0.45    0.46 
  -9   8  -2    0.71    0.43 
  -9   8  -2    0.57    0.21 
  -9   8  -2    0.66    0.26 
  -9   8  -2    0.74    0.24 
   9  -8   2    0.94    0.57 
   9  -8   2    0.40    0.34 
 -10   8  -2    0.07    0.21 
 -10   8  -2    0.40    0.24 
 -10   8  -2   -0.06    0.45 
 -10   8  -2    0.21    0.26 
  10  -8   2    0.01    0.37 
  10  -8   2    0.22    0.14 
  10  -8   2   -0.09    0.57 
  10  -8   2    0.01    0.10 
 -11   8  -2    5.84    0.58 
 -11   8  -2    6.51    1.08 
 -11   8  -2    5.41    0.66 
  11  -8   2    6.07    0.94 
  11  -8   2    4.67    0.32 
 -12   8  -2    4.00    0.46 
  12  -8   2    4.15    0.40 
  12  -8   2    4.74    0.91 
 -13   8  -2    8.88    0.72 
 -13   8  -2    7.66    0.82 
  13  -8   2    8.02    0.50 
  13  -8   2    8.53    1.19 
 -14   8  -2    4.58    0.55 
  14  -8   2    5.52    1.15 
 -15   8  -2    6.32    0.70 
  15  -8   2    7.85    1.33 
 -16   8  -2    4.37    0.63 
  16  -8   2    5.49    1.27 
 -17   8  -2    0.40    0.53 
  17  -8   2    0.85    1.06 
 -18   8  -2    2.17    0.63 
  18  -8   2    2.91    1.13 
  18   7  -2   -0.74    0.61 
  18   7  -2   -0.27    0.60 
  18   7  -2   -0.38    1.18 
 -18  -7   2    0.46    0.60 
  17   7  -2   -0.75    0.62 
  17   7  -2   -0.18    0.55 
  17   7  -2    0.06    1.12 
 -17  -7   2    0.01    0.54 
  16   7  -2   -0.36    0.53 
  16   7  -2   -0.24    1.13 
  16   7  -2    0.26    0.56 
 -16  -7   2   -0.39    0.56 
  15   7  -2   -0.58    0.51 
  15   7  -2   -0.30    0.56 
 -15  -7   2    0.00    0.51 
  14   7  -2   -0.03    0.51 
  14   7  -2    0.23    0.48 
 -14  -7   2    0.28    0.52 
  13   7  -2    0.92    0.47 
  13   7  -2    0.60    0.49 
 -13  -7   2    1.11    0.51 
  12   7  -2    1.02    0.48 
  12   7  -2    1.62    0.53 
 -12  -7   2    1.44    0.45 
 -12  -7   2    0.99    0.37 
  11   7  -2    1.52    0.43 
 -11  -7   2    1.22    0.36 
 -11  -7   2    1.51    0.44 
  10   7  -2    4.59    0.61 
 -10  -7   2    4.05    0.54 
 -10  -7   2    3.99    0.44 
   9   7  -2   18.39    0.87 
   9   7  -2   17.98    1.30 
  -9  -7   2   17.91    0.69 
  -9  -7   2   18.43    0.83 
   8   7  -2   12.45    0.67 
   8   7  -2   12.59    1.03 
  -8  -7   2   12.31    0.51 
  -8  -7   2   12.59    0.63 
   7   7  -2    0.16    0.30 
   7   7  -2   -0.33    0.24 
  -7  -7   2   -0.22    0.25 
  -7  -7   2   -0.10    0.22 
  -7  -7   2   -0.16    0.24 
   6   7  -2   36.85    0.95 
   6   7  -2   36.04    1.34 
   6   7  -2   36.60    0.92 
  -6  -7   2   37.36    0.91 
  -6  -7   2   36.72    0.86 
  -6  -7   2   36.62    1.33 
   5   7  -2   50.29    1.15 
   5   7  -2   50.54    1.60 
   5   7  -2   49.99    1.15 
  -5  -7   2   50.01    1.56 
  -5  -7   2   49.59    1.09 
  -5  -7   2   49.72    1.07 
   4   7  -2   47.40    1.03 
   4   7  -2   47.14    1.02 
   4   7  -2   48.98    1.47 
  -4  -7   2   48.12    0.98 
  -4  -7   2   48.15    1.41 
  -4  -7   2   46.71    0.96 
  -4  -7   2   47.10    0.97 
   3   7  -2    2.93    0.27 
   3   7  -2    3.03    0.29 
   3   7  -2    3.06    0.29 
  -3  -7   2    2.95    0.23 
  -3  -7   2    2.72    0.23 
  -3  -7   2    2.89    0.24 
   2   7  -2   61.80    1.21 
   2   7  -2   61.34    1.56 
   2   7  -2   61.47    1.22 
   2   7  -2   61.55    1.20 
  -2  -7   2   62.28    1.10 
  -2  -7   2   62.19    1.59 
  -2  -7   2   61.31    1.22 
   1   7  -2    5.04    0.22 
   1   7  -2    5.05    0.22 
   1   7  -2    5.49    0.50 
   1   7  -2    5.27    0.27 
  -1  -7   2    5.17    0.29 
  -1  -7   2    5.45    0.49 
   0   7  -2    2.52    0.14 
   0   7  -2    2.07    0.21 
   0   7  -2    2.64    0.22 
   0   7  -2    2.64    0.14 
   0  -7   2    2.56    0.23 
  -1   7  -2   -0.23    0.17 
  -1   7  -2    0.07    0.14 
  -1   7  -2   -0.15    0.24 
   1  -7   2   -0.07    0.17 
  -2   7  -2   65.67    1.49 
  -2   7  -2   65.06    1.37 
  -2   7  -2   62.81    1.78 
  -2   7  -2   64.96    1.48 
   2  -7   2   64.87    1.38 
  -3   7  -2   68.48    1.51 
  -3   7  -2   67.23    1.81 
  -3   7  -2   66.63    1.39 
   3  -7   2   65.97    1.40 
   3  -7   2   66.69    1.52 
  -4   7  -2   30.58    0.87 
  -4   7  -2   30.58    0.56 
  -4   7  -2   30.69    1.20 
  -4   7  -2   29.88    0.56 
  -4   7  -2   30.75    0.76 
   4  -7   2   29.50    0.87 
   4  -7   2   29.94    0.78 
  -5   7  -2    1.82    0.20 
  -5   7  -2    1.60    0.40 
  -5   7  -2    1.17    0.33 
  -5   7  -2    1.80    0.22 
  -5   7  -2    1.71    0.32 
   5  -7   2    1.60    0.39 
   5  -7   2    1.21    0.28 
  -6   7  -2   12.83    0.89 
  -6   7  -2   12.15    0.42 
  -6   7  -2   12.54    0.66 
  -6   7  -2   12.72    0.57 
  -6   7  -2   12.09    0.38 
   6  -7   2   12.01    0.67 
   6  -7   2   13.18    0.83 
  -7   7  -2   13.37    0.71 
  -7   7  -2   13.18    0.61 
  -7   7  -2   13.20    0.47 
  -7   7  -2   13.41    1.03 
  -7   7  -2   13.39    0.44 
   7  -7   2   13.13    0.90 
   7  -7   2   13.11    0.73 
  -8   7  -2    1.74    0.26 
  -8   7  -2    1.93    0.24 
  -8   7  -2    1.23    0.21 
  -8   7  -2    1.43    0.43 
   8  -7   2    1.74    0.17 
   8  -7   2    1.34    0.34 
   8  -7   2    1.75    0.16 
   8  -7   2    1.99    0.55 
  -9   7  -2    0.07    0.42 
  -9   7  -2    0.08    0.21 
  -9   7  -2    0.15    0.19 
  -9   7  -2    0.02    0.24 
   9  -7   2    0.00    0.13 
   9  -7   2    0.10    0.15 
   9  -7   2    0.12    0.53 
   9  -7   2    0.27    0.33 
 -10   7  -2   21.34    0.70 
 -10   7  -2   21.12    1.39 
 -10   7  -2   20.45    0.90 
 -10   7  -2   20.48    0.74 
  10  -7   2   20.02    0.59 
  10  -7   2   21.01    1.22 
  10  -7   2   21.11    1.17 
 -11   7  -2   11.25    0.65 
 -11   7  -2   10.09    0.77 
  11  -7   2   10.20    1.04 
  11  -7   2   10.70    0.49 
 -12   7  -2    0.64    0.28 
 -12   7  -2    1.03    0.38 
  12  -7   2    1.08    0.80 
  12  -7   2    1.02    0.27 
 -13   7  -2    1.80    0.42 
  13  -7   2    1.95    0.35 
  13  -7   2    1.99    0.88 
 -14   7  -2    1.55    0.48 
  14  -7   2    1.65    0.36 
  14  -7   2    1.80    1.01 
 -15   7  -2    4.87    0.63 
  15  -7   2    4.36    0.47 
  15  -7   2    5.84    1.26 
 -16   7  -2    1.05    0.53 
  16  -7   2    1.68    1.08 
 -17   7  -2   -0.03    0.52 
  17  -7   2    0.04    0.91 
 -18   7  -2    0.17    0.56 
  18  -7   2    0.55    1.10 
 -19   7  -2    5.46    0.80 
  19  -7   2    5.74    1.39 
  18   6  -2    0.12    0.59 
  18   6  -2   -0.40    1.17 
 -18  -6   2    0.08    0.58 
  17   6  -2   -0.46    1.04 
  17   6  -2   -0.59    0.57 
  17   6  -2   -0.30    0.54 
 -17  -6   2   -0.31    0.55 
  16   6  -2   -0.37    1.02 
  16   6  -2   -0.65    0.53 
  16   6  -2   -0.46    0.51 
 -16  -6   2   -0.48    0.50 
  15   6  -2    2.53    1.12 
  15   6  -2    1.66    0.58 
  15   6  -2    2.29    0.63 
 -15  -6   2    2.56    0.63 
  14   6  -2    0.22    0.50 
  14   6  -2   -0.03    0.49 
 -14  -6   2    0.07    0.48 
  13   6  -2    0.60    0.50 
  13   6  -2    0.73    0.46 
 -13  -6   2    0.79    0.52 
  12   6  -2    0.31    0.45 
  12   6  -2    0.35    0.43 
 -12  -6   2    0.48    0.47 
  11   6  -2   45.92    1.33 
  11   6  -2   46.25    1.90 
 -11  -6   2   46.65    1.36 
  10   6  -2    2.50    0.47 
  10   6  -2    3.20    0.48 
 -10  -6   2    3.25    0.47 
   9   6  -2   15.22    1.12 
   9   6  -2   14.21    0.69 
  -9  -6   2   14.28    0.57 
  -9  -6   2   14.24    0.66 
   8   6  -2    0.05    0.31 
   8   6  -2   -0.02    0.28 
  -8  -6   2    0.06    0.24 
  -8  -6   2    0.04    0.26 
   7   6  -2    3.88    0.38 
   7   6  -2    2.83    0.38 
  -7  -6   2    2.72    0.34 
  -7  -6   2    3.83    0.37 
  -7  -6   2    4.01    0.44 
   6   6  -2   12.59    0.50 
   6   6  -2   12.57    0.54 
   6   6  -2   12.49    0.91 
  -6  -6   2   12.06    0.46 
  -6  -6   2   12.84    0.79 
  -6  -6   2   12.45    0.45 
   5   6  -2    4.78    0.37 
   5   6  -2    4.79    0.68 
   5   6  -2    4.52    0.43 
  -5  -6   2    4.85    0.39 
  -5  -6   2    4.85    0.63 
  -5  -6   2    4.95    0.35 
   4   6  -2   90.38    2.42 
   4   6  -2   90.71    2.02 
   4   6  -2   93.25    2.04 
  -4  -6   2   92.60    2.00 
  -4  -6   2   91.55    2.01 
  -4  -6   2   91.72    1.99 
  -4  -6   2   92.16    2.44 
   3   6  -2   14.62    0.43 
   3   6  -2   15.41    0.80 
   3   6  -2   14.56    0.45 
   3   6  -2   14.49    0.46 
  -3  -6   2   14.54    0.44 
  -3  -6   2   14.62    0.42 
  -3  -6   2   14.87    0.72 
  -3  -6   2   14.64    0.41 
   2   6  -2   12.80    0.41 
   2   6  -2   13.12    0.42 
   2   6  -2   13.30    0.42 
   2   6  -2   13.52    0.73 
  -2  -6   2   12.76    0.40 
  -2  -6   2   13.19    0.66 
  -2  -6   2   13.20    0.35 
  -2  -6   2   11.47    0.33 
   1   6  -2    4.42    0.24 
   1   6  -2    5.29    0.50 
   1   6  -2    4.88    0.29 
   1   6  -2    4.61    0.24 
  -1  -6   2    4.33    0.30 
  -1  -6   2    4.95    0.47 
   0   6  -2    3.66    0.17 
   0   6  -2    3.81    0.14 
   0   6  -2    3.64    0.14 
   0   6  -2    3.48    0.18 
   0  -6   2    3.41    0.17 
   0  -6   2    3.84    0.21 
  -1   6  -2    0.31    0.24 
  -1   6  -2    0.53    0.16 
  -1   6  -2    0.45    0.14 
   1  -6   2    0.43    0.17 
  -2   6  -2   10.67    0.69 
  -2   6  -2    9.86    0.35 
  -2   6  -2    9.94    0.42 
  -2   6  -2   10.86    0.43 
   2  -6   2    9.93    0.37 
   2  -6   2    9.66    0.41 
  -3   6  -2    0.57    0.27 
  -3   6  -2    0.57    0.26 
  -3   6  -2    0.47    0.18 
   3  -6   2    0.51    0.25 
   3  -6   2    0.59    0.21 
  -4   6  -2   -0.01    0.09 
  -4   6  -2    0.09    0.27 
  -4   6  -2    0.05    0.10 
  -4   6  -2    0.06    0.29 
  -4   6  -2   -0.06    0.20 
   4  -6   2    0.11    0.22 
   4  -6   2   -0.04    0.22 
   4  -6   2   -0.02    0.26 
  -5   6  -2  127.56    2.80 
  -5   6  -2  127.04    2.51 
  -5   6  -2  127.39    3.08 
  -5   6  -2  127.90    2.67 
  -5   6  -2  125.60    2.47 
  -5   6  -2  128.14    2.66 
   5  -6   2  126.64    2.81 
   5  -6   2  128.33    3.08 
  -6   6  -2    4.22    0.29 
  -6   6  -2    4.95    0.83 
  -6   6  -2    5.00    0.53 
  -6   6  -2    4.36    0.32 
  -6   6  -2    4.92    0.45 
  -6   6  -2    4.47    0.33 
   6  -6   2    5.24    0.72 
   6  -6   2    4.91    0.57 
  -7   6  -2    2.02    0.19 
  -7   6  -2    1.91    0.21 
  -7   6  -2    1.71    0.17 
  -7   6  -2    1.82    0.35 
   7  -6   2    2.17    0.45 
   7  -6   2    2.05    0.32 
   7  -6   2    2.08    0.14 
  -8   6  -2    0.18    0.22 
  -8   6  -2    0.24    0.18 
  -8   6  -2    0.03    0.36 
  -8   6  -2    0.10    0.16 
   8  -6   2    0.10    0.14 
   8  -6   2   -0.02    0.27 
   8  -6   2    0.05    0.14 
   8  -6   2    0.05    0.41 
  -9   6  -2    8.99    0.56 
  -9   6  -2    9.43    0.43 
  -9   6  -2    9.25    0.48 
  -9   6  -2    8.78    0.90 
   9  -6   2    9.06    0.82 
   9  -6   2    8.62    0.78 
   9  -6   2    9.07    0.36 
 -10   6  -2    0.68    0.22 
 -10   6  -2    1.07    0.28 
 -10   6  -2    1.04    0.25 
  10  -6   2    1.05    0.23 
  10  -6   2    0.92    0.58 
  10  -6   2    0.75    0.36 
 -11   6  -2   42.99    1.36 
 -11   6  -2   41.62    1.14 
  11  -6   2   43.22    1.70 
  11  -6   2   42.82    1.68 
  11  -6   2   43.07    1.04 
 -12   6  -2   -0.11    0.24 
 -12   6  -2   -0.17    0.30 
  12  -6   2   -0.03    0.72 
  12  -6   2   -0.02    0.26 
 -13   6  -2    4.20    0.49 
  13  -6   2    3.90    0.38 
  13  -6   2    4.49    1.01 
 -14   6  -2    9.62    0.72 
  14  -6   2    9.77    1.35 
  14  -6   2    9.62    0.63 
 -15   6  -2    2.63    0.49 
  15  -6   2    2.92    0.43 
  15  -6   2    2.88    1.08 
 -16   6  -2   -0.04    0.49 
  16  -6   2   -0.24    0.90 
  16  -6   2   -0.35    0.34 
 -17   6  -2   -0.35    0.51 
  17  -6   2    0.40    1.04 
 -18   6  -2    1.70    0.61 
  18  -6   2    2.09    1.10 
 -19   6  -2    0.92    0.59 
  19  -6   2    1.06    1.12 
  18   5  -2    0.67    0.67 
  18   5  -2    0.91    1.23 
  18   5  -2   -0.17    0.61 
 -18  -5   2    0.79    0.69 
  17   5  -2    0.07    0.55 
  17   5  -2   -0.28    0.61 
  17   5  -2    1.00    1.16 
 -17  -5   2   -0.05    0.53 
  16   5  -2    3.03    0.63 
  16   5  -2    3.53    1.21 
 -16  -5   2    3.06    0.64 
  15   5  -2   12.63    1.49 
  15   5  -2   13.24    0.96 
  15   5  -2   12.17    1.51 
 -15  -5   2   13.23    0.96 
  14   5  -2    0.49    0.49 
  14   5  -2    0.87    1.01 
  14   5  -2    0.21    0.53 
 -14  -5   2    0.56    0.54 
  13   5  -2    1.97    0.53 
  13   5  -2    2.24    0.51 
 -13  -5   2    2.35    0.53 
  12   5  -2    0.29    0.41 
  12   5  -2    0.42    0.44 
 -12  -5   2    0.39    0.43 
  11   5  -2    0.41    0.41 
  11   5  -2    0.11    0.35 
 -11  -5   2    0.28    0.41 
  10   5  -2    0.23    0.37 
  10   5  -2    0.02    0.34 
 -10  -5   2    0.50    0.34 
   9   5  -2   10.95    1.01 
   9   5  -2    9.61    0.61 
  -9  -5   2    9.78    0.60 
   8   5  -2    8.75    0.52 
   8   5  -2   10.01    0.88 
  -8  -5   2    9.00    0.51 
  -8  -5   2    8.81    0.74 
   7   5  -2    0.88    0.27 
   7   5  -2    0.80    0.30 
  -7  -5   2    0.74    0.26 
  -7  -5   2    1.01    0.28 
   6   5  -2    2.68    0.38 
   6   5  -2    3.08    0.67 
   6   5  -2    2.62    0.36 
  -6  -5   2    2.85    0.32 
  -6  -5   2    2.72    0.36 
  -6  -5   2    2.85    0.58 
   5   5  -2   47.73    1.12 
   5   5  -2   45.98    1.07 
   5   5  -2   47.68    1.48 
  -5  -5   2   46.66    1.03 
  -5  -5   2   48.32    1.46 
  -5  -5   2   46.72    1.07 
   4   5  -2    1.34    0.21 
   4   5  -2    1.46    0.22 
   4   5  -2    1.33    0.24 
  -4  -5   2    1.37    0.16 
  -4  -5   2    1.36    0.21 
  -4  -5   2    1.14    0.20 
  -4  -5   2    1.26    0.19 
   3   5  -2  133.90    2.87 
   3   5  -2  133.57    2.90 
   3   5  -2  132.40    3.24 
   3   5  -2  137.08    2.94 
  -3  -5   2  133.88    2.88 
  -3  -5   2  135.20    2.88 
  -3  -5   2  134.09    3.26 
  -3  -5   2  133.19    2.88 
   2   5  -2   12.07    0.61 
   2   5  -2   11.26    0.37 
   2   5  -2   11.39    0.37 
   2   5  -2   11.85    0.36 
  -2  -5   2   11.17    0.32 
  -2  -5   2   12.09    0.59 
  -2  -5   2   11.49    0.33 
  -2  -5   2   11.41    0.37 
   1   5  -2   34.11    0.73 
   1   5  -2   33.80    0.76 
   1   5  -2   34.26    1.00 
   1   5  -2   34.08    0.73 
  -1  -5   2   33.05    0.77 
  -1  -5   2   34.24    0.99 
  -1  -5   2   34.66    0.68 
   0   5  -2    0.13    0.07 
   0   5  -2    0.24    0.13 
   0   5  -2    0.25    0.13 
   0   5  -2    0.17    0.07 
   0  -5   2    0.14    0.15 
   0  -5   2    0.28    0.13 
  -1   5  -2    3.14    0.18 
  -1   5  -2    3.09    0.23 
  -1   5  -2    2.78    0.14 
   1  -5   2    3.21    0.19 
  -2   5  -2  102.68    2.14 
  -2   5  -2  102.48    2.13 
  -2   5  -2  104.90    2.51 
  -2   5  -2  102.26    2.11 
   2  -5   2  102.63    2.13 
   2  -5   2  100.94    2.14 
  -3   5  -2    1.63    0.13 
  -3   5  -2    1.33    0.12 
  -3   5  -2    0.88    0.29 
  -3   5  -2    1.31    0.23 
  -3   5  -2    1.66    0.31 
   3  -5   2    1.27    0.24 
   3  -5   2    1.53    0.30 
  -4   5  -2    0.50    0.12 
  -4   5  -2    0.49    0.29 
  -4   5  -2    0.56    0.30 
  -4   5  -2    0.54    0.20 
  -4   5  -2    0.41    0.10 
   4  -5   2    0.45    0.23 
   4  -5   2    0.48    0.28 
   4  -5   2    0.53    0.22 
  -5   5  -2   52.62    1.64 
  -5   5  -2   53.35    1.16 
  -5   5  -2   53.96    1.14 
  -5   5  -2   53.61    1.27 
  -5   5  -2   53.24    1.27 
  -5   5  -2   53.94    1.40 
   5  -5   2   53.09    1.02 
   5  -5   2   54.05    1.64 
   5  -5   2   53.14    1.40 
   5  -5   2   52.64    1.01 
  -6   5  -2    7.44    0.34 
  -6   5  -2    7.12    0.34 
  -6   5  -2    7.38    0.30 
  -6   5  -2    7.15    0.43 
  -6   5  -2    6.82    0.39 
  -6   5  -2    7.13    0.82 
   6  -5   2    6.99    0.24 
   6  -5   2    6.85    0.53 
   6  -5   2    6.38    0.62 
  -7   5  -2   60.79    1.27 
  -7   5  -2   59.71    1.39 
  -7   5  -2   60.91    1.79 
  -7   5  -2   60.97    1.23 
   7  -5   2   60.98    1.19 
   7  -5   2   60.17    1.17 
   7  -5   2   59.77    1.71 
   7  -5   2   60.09    1.60 
  -8   5  -2    0.77    0.36 
  -8   5  -2    0.68    0.17 
  -8   5  -2    0.87    0.23 
  -8   5  -2    0.70    0.19 
   8  -5   2    0.82    0.18 
   8  -5   2    0.59    0.29 
   8  -5   2    0.85    0.17 
   8  -5   2    0.62    0.44 
  -9   5  -2    4.01    0.34 
  -9   5  -2    4.96    0.81 
  -9   5  -2    4.37    0.50 
  -9   5  -2    4.26    0.38 
   9  -5   2    5.00    0.75 
   9  -5   2    4.50    0.35 
   9  -5   2    3.76    0.45 
 -10   5  -2    9.58    0.52 
 -10   5  -2    9.29    0.53 
 -10   5  -2    8.74    0.67 
  10  -5   2    8.31    0.89 
  10  -5   2    8.94    0.95 
  10  -5   2    9.23    0.46 
 -11   5  -2   24.95    1.03 
 -11   5  -2   26.21    0.86 
  11  -5   2   25.96    1.41 
  11  -5   2   25.84    0.78 
  11  -5   2   25.22    1.30 
 -12   5  -2    0.88    0.34 
 -12   5  -2    0.65    0.25 
  12  -5   2    0.73    0.28 
  12  -5   2    0.88    0.72 
 -13   5  -2   -0.04    0.26 
 -13   5  -2    0.08    0.38 
  13  -5   2    0.48    0.32 
  13  -5   2    0.21    0.76 
 -14   5  -2   -0.03    0.42 
  14  -5   2   -0.19    0.91 
  14  -5   2   -0.01    0.32 
 -15   5  -2    9.10    0.77 
  15  -5   2    8.59    0.68 
  15  -5   2    9.03    1.29 
 -16   5  -2    0.76    0.49 
  16  -5   2    1.11    1.11 
  16  -5   2    1.02    0.41 
 -17   5  -2    0.49    0.50 
  17  -5   2    0.58    1.00 
  17  -5   2    0.39    0.42 
 -18   5  -2    0.21    0.52 
  18  -5   2   -0.03    0.96 
 -19   5  -2    1.67    0.62 
  19  -5   2    2.42    1.20 
  18   4  -2   -0.25    0.55 
  18   4  -2   -0.70    0.59 
  18   4  -2    0.26    1.14 
 -18  -4   2    0.04    0.65 
  17   4  -2   -0.09    1.10 
  17   4  -2   -0.49    0.54 
  17   4  -2   -0.21    0.52 
 -17  -4   2    0.02    0.62 
  16   4  -2    0.54    1.09 
  16   4  -2    0.43    0.52 
  16   4  -2    0.28    0.53 
 -16  -4   2    0.72    0.54 
  15   4  -2    0.12    0.52 
  15   4  -2    0.60    1.03 
  15   4  -2    0.28    0.50 
 -15  -4   2    0.71    0.54 
  14   4  -2    0.26    0.48 
  14   4  -2    0.17    0.96 
  14   4  -2    0.02    0.53 
 -14  -4   2    0.06    0.48 
  13   4  -2    1.15    0.51 
  13   4  -2    1.51    0.93 
  13   4  -2    1.57    0.48 
 -13  -4   2    1.17    0.48 
  12   4  -2    0.95    0.46 
  12   4  -2    1.53    0.45 
 -12  -4   2    1.61    0.47 
  11   4  -2    0.42    0.37 
  11   4  -2    0.67    0.37 
 -11  -4   2    0.33    0.38 
  10   4  -2    1.61    0.37 
  10   4  -2    1.36    0.39 
 -10  -4   2    1.77    0.38 
   9   4  -2   12.94    1.04 
   9   4  -2   11.80    0.69 
  -9  -4   2   12.18    0.64 
   8   4  -2   38.55    1.45 
   8   4  -2   36.95    1.01 
  -8  -4   2   37.42    1.05 
  -8  -4   2   39.11    1.40 
   7   4  -2    0.38    0.26 
   7   4  -2    0.33    0.27 
  -7  -4   2    0.42    0.24 
  -7  -4   2    0.23    0.29 
   6   4  -2    9.92    0.49 
   6   4  -2    9.47    0.49 
   6   4  -2   10.11    0.80 
  -6  -4   2    9.93    0.72 
  -6  -4   2    9.53    0.48 
   5   4  -2   39.50    1.39 
   5   4  -2   39.34    1.03 
   5   4  -2   40.23    1.04 
  -5  -4   2   38.76    0.96 
  -5  -4   2   39.57    1.05 
  -5  -4   2   39.48    1.36 
  -5  -4   2   40.85    1.01 
   4   4  -2    9.44    0.40 
   4   4  -2   10.37    0.70 
   4   4  -2    9.46    0.39 
  -4  -4   2    9.68    0.36 
  -4  -4   2   10.08    0.42 
  -4  -4   2   10.04    0.36 
  -4  -4   2    9.95    0.63 
   3   4  -2    6.00    0.31 
   3   4  -2    5.88    0.34 
   3   4  -2    6.09    0.55 
  -3  -4   2    5.91    0.51 
  -3  -4   2    5.71    0.28 
  -3  -4   2    5.86    0.29 
  -3  -4   2    5.82    0.32 
   2   4  -2    0.90    0.16 
   2   4  -2    0.77    0.16 
   2   4  -2    0.73    0.19 
   2   4  -2    0.94    0.16 
  -2  -4   2    0.73    0.14 
  -2  -4   2    0.71    0.19 
  -2  -4   2    0.75    0.15 
  -2  -4   2    0.84    0.14 
   1   4  -2   18.73    0.51 
   1   4  -2   18.42    0.53 
   1   4  -2   19.76    0.73 
   1   4  -2   18.76    0.51 
  -1  -4   2   19.25    0.73 
  -1  -4   2   17.96    0.53 
  -1  -4   2   18.85    0.47 
   0   4  -2   48.38    0.99 
   0   4  -2   47.76    0.99 
   0   4  -2   47.36    1.07 
   0   4  -2   47.94    1.19 
   0  -4   2   48.48    1.20 
   0  -4   2   46.45    1.06 
  -1   4  -2   27.35    0.63 
  -1   4  -2   27.08    0.65 
  -1   4  -2   26.93    0.67 
   1  -4   2   27.86    0.65 
   1  -4   2   26.76    0.67 
  -2   4  -2    5.75    0.24 
  -2   4  -2    5.74    0.27 
  -2   4  -2    5.97    0.26 
  -2   4  -2    5.63    0.50 
   2  -4   2    5.84    0.28 
   2  -4   2    5.65    0.26 
  -3   4  -2  173.07    3.99 
  -3   4  -2  171.56    3.73 
  -3   4  -2  171.36    3.85 
  -3   4  -2  171.94    3.79 
  -3   4  -2  174.93    4.21 
   3  -4   2  168.79    3.83 
   3  -4   2  169.04    3.87 
   3  -4   2  174.59    4.20 
  -4   4  -2   35.33    0.96 
  -4   4  -2   35.30    0.67 
  -4   4  -2   35.29    0.55 
  -4   4  -2   35.46    0.75 
  -4   4  -2   35.49    0.64 
  -4   4  -2   35.33    0.57 
   4  -4   2   35.14    0.67 
   4  -4   2   35.98    0.95 
   4  -4   2   34.82    0.74 
   4  -4   2   35.50    0.47 
  -5   4  -2   39.62    0.96 
  -5   4  -2   40.25    0.96 
  -5   4  -2   40.28    0.88 
  -5   4  -2   41.19    0.86 
  -5   4  -2   40.49    1.34 
   5  -4   2   39.62    1.10 
   5  -4   2   39.46    1.26 
   5  -4   2   36.88    0.78 
   5  -4   2   40.89    0.82 
  -6   4  -2   94.78    1.98 
  -6   4  -2   92.57    1.90 
  -6   4  -2   91.72    2.00 
  -6   4  -2   92.51    1.90 
  -6   4  -2   92.16    2.36 
  -6   4  -2   93.60    1.88 
   6  -4   2   93.49    1.85 
   6  -4   2   92.81    2.19 
   6  -4   2   92.44    2.32 
   6  -4   2   91.22    1.81 
  -7   4  -2   18.06    0.53 
  -7   4  -2   17.75    1.03 
  -7   4  -2   17.65    0.66 
  -7   4  -2   17.91    0.56 
   7  -4   2   17.53    0.83 
   7  -4   2   17.94    0.51 
   7  -4   2   17.41    0.89 
   7  -4   2   17.26    0.49 
  -8   4  -2   38.38    0.98 
  -8   4  -2   39.10    0.95 
  -8   4  -2   37.18    1.42 
  -8   4  -2   37.10    1.10 
   8  -4   2   36.89    1.37 
   8  -4   2   38.31    0.90 
   8  -4   2   38.00    1.34 
  -9   4  -2   17.07    0.66 
  -9   4  -2   16.97    0.77 
  -9   4  -2   17.51    0.61 
   9  -4   2   17.22    1.02 
   9  -4   2   17.19    0.90 
   9  -4   2   17.27    1.01 
   9  -4   2   17.44    0.58 
 -10   4  -2    0.04    0.20 
 -10   4  -2   -0.06    0.25 
  10  -4   2    0.01    0.34 
  10  -4   2   -0.03    0.55 
  10  -4   2    0.10    0.26 
  10  -4   2    0.11    0.24 
 -11   4  -2   11.23    0.77 
 -11   4  -2   10.18    0.59 
  11  -4   2   11.75    1.11 
  11  -4   2   10.34    0.55 
  11  -4   2   11.32    0.98 
  11  -4   2   11.40    1.00 
 -12   4  -2    5.35    0.71 
 -12   4  -2    5.71    0.56 
  12  -4   2    5.68    1.05 
  12  -4   2    5.74    0.95 
  12  -4   2    5.73    0.53 
 -13   4  -2    0.66    0.28 
 -13   4  -2    0.81    0.41 
  13  -4   2    0.99    0.34 
  13  -4   2    1.01    0.80 
  13  -4   2    0.65    0.37 
 -14   4  -2    7.42    0.68 
  14  -4   2    8.09    1.27 
  14  -4   2    7.33    0.64 
 -15   4  -2    1.91    0.51 
  15  -4   2    0.72    0.47 
  15  -4   2    1.49    0.43 
  15  -4   2    1.48    0.99 
 -16   4  -2   19.52    1.01 
  16  -4   2   18.01    1.55 
  16  -4   2   18.51    1.43 
  16  -4   2   19.81    0.92 
 -17   4  -2    6.69    0.83 
  17  -4   2    5.97    1.30 
  17  -4   2    7.01    0.76 
 -18   4  -2    0.08    0.52 
  18  -4   2    0.30    0.44 
  18  -4   2    0.14    1.02 
 -19   4  -2    1.06    0.61 
  19  -4   2    1.21    1.17 
 -20   4  -2    0.07    0.60 
  20  -4   2    0.44    1.13 
  19   3  -2   -0.53    0.67 
  19   3  -2    0.54    1.23 
  19   3  -2    0.45    0.60 
 -19  -3   2    0.73    0.65 
  18   3  -2   -0.81    1.10 
  18   3  -2    0.31    0.56 
  18   3  -2   -0.46    0.57 
 -18  -3   2    0.14    0.58 
  17   3  -2    0.50    0.54 
  17   3  -2    0.04    0.57 
  17   3  -2    0.34    1.10 
 -17  -3   2    0.81    0.58 
  16   3  -2    2.34    0.59 
  16   3  -2    2.67    1.19 
 -16  -3   2    2.38    0.63 
  15   3  -2    9.90    0.86 
  15   3  -2    9.40    1.40 
  15   3  -2   10.39    1.41 
 -15  -3   2   10.68    0.91 
  14   3  -2    0.08    0.94 
  14   3  -2   -0.14    0.50 
  14   3  -2   -0.04    0.46 
 -14  -3   2   -0.01    0.48 
  13   3  -2    0.17    0.87 
  13   3  -2    0.08    0.45 
  13   3  -2   -0.04    0.43 
 -13  -3   2    0.04    0.48 
  12   3  -2    3.08    0.91 
  12   3  -2    3.28    0.47 
  12   3  -2    2.51    0.48 
 -12  -3   2    3.09    0.48 
  11   3  -2    1.24    0.78 
  11   3  -2    0.68    0.36 
  11   3  -2    0.89    0.40 
 -11  -3   2    0.57    0.40 
  10   3  -2    0.34    0.34 
  10   3  -2    0.30    0.34 
 -10  -3   2    0.33    0.34 
   9   3  -2    8.87    0.57 
   9   3  -2    9.23    0.93 
  -9  -3   2    8.40    0.55 
   8   3  -2   85.81    2.41 
   8   3  -2   86.64    1.96 
  -8  -3   2   87.35    2.37 
  -8  -3   2   86.78    1.95 
   7   3  -2   46.99    1.57 
   7   3  -2   44.71    1.14 
  -7  -3   2   46.71    1.51 
  -7  -3   2   46.12    1.18 
   6   3  -2   12.74    0.52 
   6   3  -2   13.09    0.53 
   6   3  -2   13.45    0.85 
  -6  -3   2   13.06    0.53 
  -6  -3   2   13.57    0.79 
   5   3  -2   12.99    0.52 
   5   3  -2   13.15    0.83 
   5   3  -2   13.78    0.56 
  -5  -3   2   12.40    0.51 
  -5  -3   2   13.02    0.76 
  -5  -3   2   12.99    0.48 
   4   3  -2   42.14    0.87 
   4   3  -2   42.73    1.18 
   4   3  -2   43.35    0.87 
  -4  -3   2   43.02    0.86 
  -4  -3   2   42.06    1.14 
  -4  -3   2   42.56    0.87 
   3   3  -2    0.17    0.19 
   3   3  -2    0.46    0.18 
   3   3  -2    0.28    0.19 
  -3  -3   2    0.38    0.18 
  -3  -3   2    0.74    0.16 
  -3  -3   2    0.17    0.17 
  -3  -3   2    0.31    0.17 
   2   3  -2  257.43    6.40 
   2   3  -2  258.81    6.43 
   2   3  -2  252.33    6.76 
   2   3  -2  253.18    6.34 
  -2  -3   2  250.93    6.30 
  -2  -3   2  251.51    6.31 
  -2  -3   2  256.33    6.38 
  -2  -3   2  252.80    6.58 
   1   3  -2  109.22    2.30 
   1   3  -2  108.26    2.49 
   1   3  -2  108.80    2.32 
   1   3  -2  109.49    2.31 
  -1  -3   2  109.78    2.29 
  -1  -3   2  108.64    2.29 
  -1  -3   2  107.25    2.31 
  -1  -3   2  107.50    2.48 
   0   3  -2   19.88    0.45 
   0   3  -2   19.40    0.60 
   0   3  -2   19.26    0.50 
   0   3  -2   20.13    0.45 
   0  -3   2   20.54    0.43 
   0  -3   2   19.74    0.60 
   0  -3   2   19.33    0.51 
  -1   3  -2    6.68    0.26 
  -1   3  -2    6.41    0.20 
  -1   3  -2    7.32    0.31 
  -1   3  -2    6.20    0.20 
  -1   3  -2    6.80    0.29 
   1  -3   2    7.35    0.31 
   1  -3   2    6.70    0.30 
  -2   3  -2   79.57    1.48 
  -2   3  -2   81.35    1.59 
  -2   3  -2   81.88    1.87 
  -2   3  -2   80.56    1.49 
  -2   3  -2   80.79    1.51 
  -2   3  -2   79.80    1.55 
   2  -3   2   71.51    1.50 
   2  -3   2   79.34    1.81 
   2  -3   2   81.90    1.61 
  -3   3  -2    5.27    0.22 
  -3   3  -2    5.92    0.33 
  -3   3  -2    6.13    0.24 
  -3   3  -2    6.69    0.60 
  -3   3  -2    5.43    0.24 
  -3   3  -2    5.39    0.30 
   3  -3   2    6.40    0.52 
   3  -3   2    5.33    0.18 
   3  -3   2    5.68    0.33 
   3  -3   2    5.39    0.32 
  -4   3  -2   28.15    0.65 
  -4   3  -2   28.86    0.59 
  -4   3  -2   29.36    0.99 
  -4   3  -2   28.36    0.62 
  -4   3  -2   28.74    0.67 
   4  -3   2   28.76    0.57 
   4  -3   2   29.36    0.99 
   4  -3   2   28.72    0.78 
   4  -3   2   27.23    0.56 
  -5   3  -2    0.60    0.30 
  -5   3  -2    0.16    0.14 
  -5   3  -2    0.32    0.12 
  -5   3  -2    0.18    0.16 
  -5   3  -2    0.30    0.19 
   5  -3   2    0.34    0.14 
   5  -3   2    0.25    0.14 
   5  -3   2    0.31    0.24 
   5  -3   2    0.47    0.34 
   5  -3   2    0.31    0.14 
  -6   3  -2    2.13    0.36 
  -6   3  -2    1.35    0.22 
  -6   3  -2    1.58    0.34 
  -6   3  -2    1.47    0.21 
  -6   3  -2    1.62    0.25 
  -6   3  -2    1.49    0.18 
   6  -3   2    1.38    0.20 
   6  -3   2    1.56    0.20 
   6  -3   2    1.39    0.29 
   6  -3   2    1.50    0.19 
   6  -3   2    1.90    0.42 
  -7   3  -2    0.20    0.18 
  -7   3  -2    0.24    0.15 
  -7   3  -2    0.22    0.30 
  -7   3  -2    0.15    0.19 
  -7   3  -2    0.13    0.22 
   7  -3   2    0.21    0.18 
   7  -3   2    0.20    0.18 
   7  -3   2    0.16    0.18 
   7  -3   2    0.33    0.40 
   7  -3   2    0.13    0.27 
  -8   3  -2    5.99    0.43 
  -8   3  -2    5.72    0.34 
  -8   3  -2    6.37    0.50 
   8  -3   2    6.20    0.70 
   8  -3   2    5.63    0.36 
   8  -3   2    6.27    0.70 
   8  -3   2    6.04    0.60 
  -9   3  -2   33.87    1.11 
  -9   3  -2   31.93    0.94 
  -9   3  -2   32.36    0.87 
   9  -3   2   33.88    1.23 
   9  -3   2   33.97    1.35 
   9  -3   2   32.08    0.87 
   9  -3   2   33.91    1.34 
 -10   3  -2    1.68    0.34 
 -10   3  -2    1.43    0.24 
  10  -3   2    1.67    0.30 
  10  -3   2    1.57    0.32 
  10  -3   2    1.68    0.40 
  10  -3   2    1.98    0.65 
 -11   3  -2   55.40    1.66 
 -11   3  -2   55.77    1.45 
  11  -3   2   55.27    1.92 
  11  -3   2   55.26    1.97 
  11  -3   2   56.52    1.37 
  11  -3   2   56.00    1.84 
 -12   3  -2   34.59    1.30 
 -12   3  -2   33.83    1.05 
  12  -3   2   34.27    1.48 
  12  -3   2   33.92    0.97 
  12  -3   2   32.93    1.52 
 -13   3  -2    7.42    0.78 
 -13   3  -2    8.29    0.69 
  13  -3   2    8.53    0.62 
  13  -3   2    7.15    1.00 
  13  -3   2    7.62    1.01 
 -14   3  -2   39.48    1.29 
  14  -3   2   40.41    1.24 
  14  -3   2   38.74    1.87 
  14  -3   2   39.86    1.83 
 -15   3  -2    0.85    0.47 
  15  -3   2    0.59    0.40 
  15  -3   2    0.32    0.90 
  15  -3   2    0.03    0.43 
 -16   3  -2    3.03    0.60 
  16  -3   2    2.85    1.12 
  16  -3   2    2.95    0.52 
 -17   3  -2    9.26    0.89 
  17  -3   2    8.23    1.39 
  17  -3   2    8.24    1.30 
  17  -3   2    8.88    0.82 
 -18   3  -2    8.99    0.90 
  18  -3   2    8.89    1.49 
  18  -3   2    8.97    0.84 
 -19   3  -2    3.74    0.71 
  19  -3   2    2.96    0.58 
  19  -3   2    3.71    1.31 
 -20   3  -2    0.25    0.61 
  20  -3   2    1.12    1.33 
  19   2  -2   -0.28    0.61 
  19   2  -2   -0.65    1.16 
 -19  -2   2    0.10    0.65 
  18   2  -2   -0.09    1.13 
  18   2  -2   -0.21    0.53 
  18   2  -2   -0.61    0.56 
 -18  -2   2   -0.07    0.61 
  17   2  -2   -0.05    0.54 
  17   2  -2    0.73    0.60 
  17   2  -2    0.03    1.01 
 -17  -2   2    0.04    0.55 
  16   2  -2    0.35    1.07 
  16   2  -2    0.46    0.51 
  16   2  -2   -0.18    0.53 
 -16  -2   2    0.67    0.57 
  15   2  -2    2.34    0.65 
  15   2  -2    3.46    0.59 
  15   2  -2    3.74    1.20 
 -15  -2   2    3.48    0.64 
  14   2  -2    2.00    0.50 
  14   2  -2    2.57    1.03 
  14   2  -2    1.44    0.52 
 -14  -2   2    2.29    0.54 
  13   2  -2    1.21    0.93 
  13   2  -2    1.13    0.47 
  13   2  -2    1.38    0.46 
 -13  -2   2    1.52    0.52 
  12   2  -2    1.23    0.40 
  12   2  -2    1.70    0.87 
  12   2  -2    1.35    0.45 
 -12  -2   2    1.32    0.43 
  11   2  -2    0.26    0.39 
  11   2  -2    0.39    0.60 
  11   2  -2    0.54    0.40 
 -11  -2   2    0.45    0.37 
  10   2  -2   19.67    1.18 
  10   2  -2   21.31    1.24 
  10   2  -2   20.21    0.78 
 -10  -2   2   20.28    0.79 
   9   2  -2    6.56    0.86 
   9   2  -2    7.04    0.88 
   9   2  -2    6.56    0.53 
  -9  -2   2    6.93    0.75 
  -9  -2   2    6.62    0.53 
   8   2  -2   80.08    2.32 
   8   2  -2   77.24    1.81 
  -8  -2   2   82.63    2.29 
  -8  -2   2   77.90    1.85 
   7   2  -2    0.17    0.24 
   7   2  -2    0.54    0.26 
  -7  -2   2    0.31    0.22 
  -7  -2   2    0.42    0.29 
   6   2  -2    3.36    0.31 
  -6  -2   2    3.33    0.27 
   5   2  -2   10.71    0.80 
   5   2  -2   10.10    0.50 
   5   2  -2   10.37    0.49 
  -5  -2   2   10.71    0.72 
  -5  -2   2    9.94    0.49 
  -5  -2   2   10.47    0.46 
   4   2  -2    7.10    0.61 
   4   2  -2    6.37    0.35 
   4   2  -2    6.83    0.34 
  -4  -2   2    6.73    0.54 
  -4  -2   2    6.84    0.33 
  -4  -2   2    6.42    0.34 
   3   2  -2   14.83    0.44 
   3   2  -2   15.07    0.44 
   3   2  -2   14.98    0.66 
  -3  -2   2   14.87    0.63 
  -3  -2   2   14.97    0.42 
  -3  -2   2   14.49    0.43 
   2   2  -2    7.21    0.43 
   2   2  -2    6.56    0.26 
   2   2  -2    7.23    0.27 
  -2  -2   2    7.14    0.26 
  -2  -2   2    6.99    0.28 
  -2  -2   2    7.02    0.25 
  -2  -2   2    7.10    0.44 
   1   2  -2    8.45    0.25 
   1   2  -2    7.63    0.25 
   1   2  -2    8.36    0.26 
   1   2  -2    9.03    0.42 
  -1  -2   2    8.80    0.37 
  -1  -2   2    8.12    0.25 
  -1  -2   2    8.29    0.24 
  -1  -2   2    7.98    0.25 
   0   2  -2   63.42    1.20 
   0  -2   2   66.71    1.24 
   0  -2   2   64.13    1.19 
   0  -2   2   68.64    1.34 
  -1   2  -2    0.32    0.10 
  -1   2  -2    0.71    0.07 
   1  -2   2    0.65    0.11 
   1  -2   2    0.94    0.08 
   1  -2   2    0.71    0.12 
  -2   2  -2  332.19    9.10 
  -2   2  -2  348.20    8.92 
  -2   2  -2  333.03    8.65 
   2  -2   2  319.76    9.08 
   2  -2   2  326.74    8.34 
   2  -2   2  334.64    8.61 
  -3   2  -2    0.12    0.18 
  -3   2  -2    0.22    0.13 
  -3   2  -2    0.16    0.05 
  -3   2  -2    0.12    0.10 
  -3   2  -2    0.14    0.08 
   3  -2   2    0.12    0.07 
   3  -2   2    0.11    0.14 
   3  -2   2    0.25    0.17 
   3  -2   2    0.16    0.16 
   3  -2   2    0.14    0.05 
  -4   2  -2    1.00    0.13 
  -4   2  -2    0.94    0.11 
  -4   2  -2    1.12    0.22 
  -4   2  -2    0.94    0.12 
  -4   2  -2    1.03    0.08 
   4  -2   2    1.01    0.12 
   4  -2   2    1.17    0.24 
   4  -2   2    1.11    0.20 
   4  -2   2    1.10    0.10 
   4  -2   2    1.00    0.11 
  -5   2  -2    7.97    0.66 
  -5   2  -2    7.59    0.39 
  -5   2  -2    7.35    0.32 
  -5   2  -2    7.13    0.34 
  -5   2  -2    7.50    0.34 
   5  -2   2    7.66    0.51 
   5  -2   2    7.46    0.44 
   5  -2   2    7.14    0.30 
   5  -2   2    7.71    0.61 
   5  -2   2    7.61    0.31 
  -6   2  -2    0.11    0.19 
  -6   2  -2    0.16    0.14 
  -6   2  -2    0.16    0.30 
  -6   2  -2   -0.01    0.20 
  -6   2  -2   -0.03    0.16 
   6  -2   2    0.09    0.18 
   6  -2   2   -0.01    0.18 
   6  -2   2    0.22    0.26 
   6  -2   2    0.12    0.37 
   6  -2   2    0.14    0.17 
  -7   2  -2   12.72    0.44 
  -7   2  -2   11.94    0.58 
  -7   2  -2   12.70    0.51 
   7  -2   2   12.19    0.79 
   7  -2   2   12.68    0.44 
   7  -2   2   11.88    0.69 
   7  -2   2   12.75    0.46 
   7  -2   2   12.09    0.65 
  -8   2  -2   16.55    0.58 
  -8   2  -2   17.37    0.73 
  -8   2  -2   17.35    0.57 
   8  -2   2   17.34    0.85 
   8  -2   2   17.44    0.93 
   8  -2   2   17.60    0.82 
   8  -2   2   16.79    0.56 
  -9   2  -2  101.70    2.18 
  -9   2  -2   99.95    2.38 
  -9   2  -2  102.94    2.16 
   9  -2   2   98.89    2.63 
   9  -2   2   98.82    2.58 
   9  -2   2  101.11    2.50 
   9  -2   2  101.24    2.12 
 -10   2  -2   65.03    1.78 
 -10   2  -2   63.02    1.54 
  10  -2   2   63.35    1.48 
  10  -2   2   64.12    1.88 
  10  -2   2   62.65    1.95 
  10  -2   2   65.09    2.06 
 -11   2  -2   11.66    0.80 
 -11   2  -2   11.77    0.63 
  11  -2   2   11.39    0.99 
  11  -2   2   11.48    1.00 
  11  -2   2   12.13    0.63 
  11  -2   2   12.38    0.98 
 -12   2  -2    3.21    0.41 
 -12   2  -2    2.60    0.33 
  12  -2   2    3.13    0.36 
  12  -2   2    2.81    0.42 
  12  -2   2    2.93    0.54 
  12  -2   2    3.58    0.82 
 -13   2  -2    3.34    0.45 
  13  -2   2    3.87    0.45 
  13  -2   2    2.79    0.43 
  13  -2   2    4.27    0.93 
 -14   2  -2    0.23    0.39 
  14  -2   2    0.04    0.80 
  14  -2   2    0.14    0.39 
  14  -2   2    0.59    0.36 
 -15   2  -2    0.45    0.44 
  15  -2   2    0.28    0.45 
  15  -2   2    0.71    0.39 
  15  -2   2    0.41    0.97 
 -16   2  -2    2.89    0.57 
  16  -2   2    2.88    0.53 
  16  -2   2    3.00    1.10 
 -17   2  -2    6.80    0.82 
  17  -2   2    6.39    0.72 
  17  -2   2    7.38    1.40 
 -18   2  -2    0.46    0.53 
  18  -2   2    0.56    1.04 
  18  -2   2    0.36    0.48 
  18  -2   2   -0.23    0.48 
 -19   2  -2    0.41    0.57 
  19  -2   2    0.49    1.20 
  19  -2   2    0.69    0.53 
  19  -2   2   -0.17    0.52 
 -20   2  -2    0.59    0.63 
  20  -2   2   -0.45    0.55 
  20  -2   2    0.30    1.14 
  20  -2   2    0.53    0.53 
  19   1  -2    1.89    1.32 
  19   1  -2    1.63    0.62 
 -19  -1   2    2.25    0.78 
  18   1  -2   -0.90    1.08 
  18   1  -2   -0.46    0.55 
  18   1  -2   -0.31    0.57 
 -18  -1   2    0.01    0.61 
  17   1  -2    2.08    1.15 
  17   1  -2    1.29    0.62 
  17   1  -2    1.55    0.54 
 -17  -1   2    2.54    0.65 
  16   1  -2    0.26    0.50 
  16   1  -2    0.22    1.03 
  16   1  -2   -0.40    0.49 
 -16  -1   2    0.25    0.54 
  15   1  -2    1.55    0.53 
  15   1  -2    1.46    1.06 
  15   1  -2    0.82    0.51 
 -15  -1   2    1.54    0.54 
  14   1  -2    6.08    0.72 
  14   1  -2    6.64    1.25 
 -14  -1   2    6.29    0.77 
  13   1  -2    5.37    0.53 
  13   1  -2    4.62    0.57 
  13   1  -2    7.08    1.17 
 -13  -1   2    6.08    0.63 
  12   1  -2    1.74    0.82 
  12   1  -2    1.76    0.41 
  12   1  -2    1.49    0.43 
 -12  -1   2    1.56    0.42 
  11   1  -2    2.35    0.44 
  11   1  -2    3.29    0.88 
  11   1  -2    3.09    0.43 
 -11  -1   2    3.17    0.44 
  10   1  -2   16.99    0.73 
  10   1  -2   17.61    1.14 
  10   1  -2   17.65    1.15 
 -10  -1   2   17.08    0.74 
   9   1  -2    1.41    0.33 
   9   1  -2    1.11    0.34 
   9   1  -2    1.33    0.64 
  -9  -1   2    0.96    0.26 
  -9  -1   2    1.09    0.32 
   8   1  -2    0.14    0.53 
   8   1  -2    0.10    0.28 
   8   1  -2    0.01    0.25 
  -8  -1   2    0.19    0.27 
  -8  -1   2    0.09    0.23 
   7   1  -2    4.33    0.69 
   7   1  -2    4.60    0.43 
   7   1  -2    4.12    0.70 
  -7  -1   2    3.92    0.58 
  -7  -1   2    4.41    0.43 
   6   1  -2   81.99    1.79 
   6   1  -2   81.91    2.17 
   6   1  -2   88.90    2.00 
   6   1  -2   82.09    2.17 
  -6  -1   2   83.43    1.82 
  -6  -1   2   85.21    2.17 
  -6  -1   2   86.12    1.83 
   5   1  -2  226.98    5.20 
   5   1  -2  215.73    5.37 
   5   1  -2  216.64    5.40 
   5   1  -2  219.52    5.07 
  -5  -1   2  225.17    5.13 
  -5  -1   2  218.08    5.06 
  -5  -1   2  221.30    5.42 
   4   1  -2  108.71    2.39 
   4   1  -2  106.13    2.66 
   4   1  -2  105.25    2.64 
   4   1  -2  108.09    2.37 
  -4  -1   2  106.59    2.37 
  -4  -1   2  111.81    2.40 
  -4  -1   2  109.65    2.67 
   3   1  -2   10.72    0.36 
   3   1  -2   10.47    0.54 
   3   1  -2   10.42    0.36 
   3   1  -2   10.52    0.56 
  -3  -1   2   10.40    0.36 
  -3  -1   2   10.56    0.34 
  -3  -1   2   11.47    0.54 
   2   1  -2   24.73    0.58 
   2   1  -2   23.87    0.57 
   2   1  -2   23.94    0.75 
   2   1  -2   23.52    0.73 
  -2  -1   2   24.53    0.57 
  -2  -1   2   24.21    0.74 
  -2  -1   2   24.12    0.58 
   1   1  -2    0.13    0.17 
   1   1  -2   -0.07    0.11 
   1   1  -2    0.13    0.08 
   1   1  -2    0.02    0.07 
   1   1  -2    0.16    0.10 
  -1  -1   2    0.08    0.10 
  -1  -1   2    0.10    0.10 
  -1  -1   2    0.09    0.08 
  -1  -1   2    0.02    0.06 
  -1   1  -2    0.10    0.05 
  -1   1  -2   -0.01    0.02 
  -1   1  -2    0.01    0.03 
   1  -1   2    0.05    0.03 
   1  -1   2   -0.01    0.03 
   1  -1   2    0.04    0.03 
   1  -1   2    0.25    0.06 
   2  -1   2    6.15    0.20 
   2  -1   2    4.72    0.15 
  -3   1  -2   10.86    0.53 
  -3   1  -2   11.46    0.32 
  -3   1  -2   10.11    0.30 
  -3   1  -2   11.31    0.31 
  -3   1  -2   11.09    0.28 
   3  -1   2   11.44    0.29 
   3  -1   2   11.37    0.32 
   3  -1   2   10.98    0.49 
   3  -1   2   11.35    0.32 
   3  -1   2   11.98    0.30 
  -4   1  -2   49.96    1.11 
  -4   1  -2   53.84    1.09 
  -4   1  -2   52.41    1.08 
  -4   1  -2   53.59    1.06 
  -4   1  -2   50.97    1.37 
   4  -1   2   52.99    1.07 
   4  -1   2   51.57    1.05 
   4  -1   2   50.41    1.13 
   4  -1   2   50.55    1.32 
  -5   1  -2  155.32    3.26 
  -5   1  -2  153.92    3.24 
  -5   1  -2  157.76    3.27 
  -5   1  -2  150.32    3.21 
  -5   1  -2  157.84    3.39 
   5  -1   2  159.18    3.29 
   5  -1   2  155.42    3.39 
   5  -1   2  157.91    3.62 
   5  -1   2  154.51    3.23 
  -6   1  -2    3.39    0.32 
  -6   1  -2    3.22    0.28 
  -6   1  -2    3.45    0.41 
   6  -1   2    2.56    0.32 
   6  -1   2    3.33    0.28 
   6  -1   2    3.92    0.47 
   6  -1   2    2.91    0.24 
  -7   1  -2    0.03    0.19 
  -7   1  -2    0.22    0.21 
  -7   1  -2    0.14    0.15 
   7  -1   2    0.09    0.20 
   7  -1   2    0.12    0.21 
   7  -1   2    0.44    0.30 
   7  -1   2    0.21    0.20 
  -8   1  -2    6.79    0.43 
  -8   1  -2    6.33    0.56 
  -8   1  -2    6.22    0.43 
   8  -1   2    6.22    0.40 
   8  -1   2    6.87    0.72 
   8  -1   2    6.67    0.64 
  -9   1  -2    8.99    0.54 
  -9   1  -2    8.97    0.61 
   9  -1   2    9.71    0.82 
   9  -1   2    8.76    0.46 
   9  -1   2    8.85    0.73 
 -10   1  -2   56.29    1.34 
 -10   1  -2   58.48    1.61 
  10  -1   2   58.22    1.33 
  10  -1   2   58.35    1.70 
  10  -1   2   57.56    1.80 
 -11   1  -2   36.89    1.34 
 -11   1  -2   35.07    1.07 
  11  -1   2   36.11    1.40 
  11  -1   2   36.03    1.56 
  11  -1   2   36.48    1.54 
  11  -1   2   35.37    1.04 
 -12   1  -2    1.70    0.32 
 -12   1  -2    2.47    0.40 
  12  -1   2    1.74    0.37 
  12  -1   2    2.67    0.40 
  12  -1   2    1.99    0.52 
  12  -1   2    2.61    0.81 
 -13   1  -2    2.48    0.41 
  13  -1   2    2.96    0.82 
  13  -1   2    2.24    0.43 
  13  -1   2    2.87    0.39 
 -14   1  -2   -0.19    0.37 
  14  -1   2    0.37    0.81 
  14  -1   2    0.11    0.35 
  14  -1   2    0.05    0.35 
 -15   1  -2    0.24    0.44 
  15  -1   2    0.03    0.43 
  15  -1   2    0.18    0.38 
  15  -1   2    0.60    0.91 
 -16   1  -2    6.30    0.64 
  16  -1   2    7.94    1.30 
  16  -1   2    7.76    0.81 
 -17   1  -2    0.39    0.56 
  17  -1   2    0.52    1.01 
  17  -1   2   -0.10    0.44 
  17  -1   2    0.28    0.48 
 -18   1  -2    2.69    0.69 
  18  -1   2    3.99    1.36 
  18  -1   2    2.90    0.55 
 -19   1  -2    0.36    0.58 
  19  -1   2    0.30    1.11 
  19  -1   2    0.43    0.48 
 -20   1  -2    1.07    0.66 
  20  -1   2    0.74    0.56 
  20  -1   2   -0.03    0.56 
  20  -1   2    0.77    1.29 
  19   0  -2   -0.34    0.53 
  19   0  -2    0.01    1.20 
  19   0  -2   -0.61    0.56 
 -19   0   2    0.06    0.64 
  18   0  -2    2.59    0.66 
  18   0  -2    3.99    1.41 
  18   0  -2    1.39    0.69 
 -18   0   2    2.80    0.70 
  17   0  -2    2.62    0.55 
  17   0  -2    1.75    0.60 
  17   0  -2    3.72    1.30 
 -17   0   2    3.10    0.66 
  16   0  -2   -0.09    0.46 
  16   0  -2    0.01    0.51 
  16   0  -2    0.41    1.04 
 -16   0   2    0.40    0.60 
  15   0  -2    0.56    0.46 
  15   0  -2    0.47    0.53 
  15   0  -2    0.71    0.99 
 -15   0   2    0.31    0.54 
  14   0  -2   -0.28    0.90 
  14   0  -2   -0.09    0.50 
  14   0  -2   -0.06    0.46 
 -14   0   2    0.34    0.47 
  13   0  -2    2.22    0.52 
  13   0  -2    3.57    1.04 
  13   0  -2    3.09    0.53 
 -13   0   2    2.67    0.52 
  12   0  -2    0.42    0.41 
  12   0  -2    0.48    0.42 
  12   0  -2    0.24    0.79 
 -12   0   2    0.33    0.41 
  11   0  -2    0.55    0.34 
  11   0  -2    0.43    0.72 
  11   0  -2    0.64    0.38 
 -11   0   2    0.60    0.37 
  10   0  -2    0.69    0.34 
  10   0  -2    0.62    0.66 
  10   0  -2    0.54    0.31 
 -10   0   2    0.45    0.33 
   9   0  -2    2.61    0.69 
   9   0  -2    2.65    0.32 
   9   0  -2    2.36    0.37 
  -9   0   2    2.80    0.37 
  -9   0   2    2.36    0.29 
   8   0  -2    3.38    0.34 
   8   0  -2    4.17    0.73 
  -8   0   2    3.30    0.36 
  -8   0   2    3.46    0.60 
   7   0  -2    5.10    0.71 
   7   0  -2    5.15    0.47 
   7   0  -2    5.68    0.72 
  -7   0   2    5.72    0.63 
  -7   0   2    5.11    0.48 
   6   0  -2    3.97    0.63 
   6   0  -2    4.42    0.49 
   6   0  -2    4.19    0.65 
   6   0  -2    3.95    0.43 
  -6   0   2    3.97    0.35 
  -6   0   2    4.09    0.62 
  -6   0   2    3.94    0.40 
   5   0  -2    1.22    0.22 
   5   0  -2    1.64    0.22 
   5   0  -2    0.91    0.47 
   5   0  -2    1.16    0.24 
  -5   0   2    1.12    0.22 
  -5   0   2    1.15    0.20 
  -5   0   2    1.22    0.21 
   4   0  -2   17.66    0.53 
   4   0  -2   18.78    0.80 
   4   0  -2   18.31    0.53 
   4   0  -2   18.37    0.79 
  -4   0   2   17.68    0.54 
  -4   0   2   17.77    0.52 
  -4   0   2   19.16    0.76 
   3   0  -2  193.85    4.46 
   3   0  -2  188.42    4.39 
   3   0  -2  192.27    4.70 
   3   0  -2  189.67    4.66 
  -3   0   2  192.08    4.43 
  -3   0   2  191.71    4.67 
  -3   0   2  191.17    4.43 
   2   0  -2   11.90    0.52 
   2   0  -2   12.35    0.34 
   2   0  -2   11.32    0.49 
   2   0  -2   13.03    0.35 
  -2   0   2   12.03    0.49 
  -2   0   2   12.64    0.34 
  -2   0   2   11.77    0.48 
  -2   0   2   12.91    0.34 
   1   0  -2   85.68    1.58 
   1   0  -2   73.47    1.65 
  -1   0   2   86.45    1.59 
   0   0  -2    0.04    0.03 
   0   0  -2    0.01    0.02 
   0   0   2    0.05    0.04 
   0   0   2   -0.03    0.02 
  -1   0  -2    0.00    0.02 
  -1   0  -2    0.06    0.03 
  -1   0  -2    0.01    0.02 
  -1   0  -2    0.04    0.03 
   1   0   2   -0.01    0.02 
   1   0   2    0.04    0.04 
   1   0   2   -0.02    0.02 
   1   0   2    0.00    0.03 
  -2   0  -2    8.08    0.22 
  -3   0  -2   38.00    0.76 
  -3   0  -2   38.94    0.74 
  -3   0  -2   38.20    0.95 
   3   0   2   37.62    0.81 
   3   0   2   38.42    0.74 
   3   0   2   35.23    0.92 
   3   0   2   38.58    0.74 
   3   0   2   39.24    0.77 
  -4   0  -2   39.90    0.66 
  -4   0  -2   39.80    0.69 
  -4   0  -2   38.71    0.75 
  -4   0  -2   39.49    0.65 
   4   0   2   40.18    0.68 
   4   0   2   38.72    0.76 
   4   0   2   40.12    0.91 
   4   0   2   39.78    0.67 
  -5   0  -2  195.41    4.20 
  -5   0  -2  191.20    4.17 
  -5   0  -2  189.13    4.27 
   5   0   2  195.25    4.19 
   5   0   2  190.33    4.45 
   5   0   2  189.25    4.28 
   5   0   2  194.89    4.20 
  -6   0  -2    1.63    0.23 
  -6   0  -2    1.76    0.21 
  -6   0  -2    1.55    0.19 
   6   0   2    1.57    0.21
[truncated: 2,157,990 more chars]
