# Supplementary material for: Iron(III) Complexes with Non-Steroidal Anti-Inflammatory Drugs: Structure, Antioxidant and Anticholinergic Activity, and Interaction with Biomolecules
Source: Int J Mol Sci. 2023 Mar 28;24(7):6391. doi: 10.3390/ijms24076391 (PMC10094617; doi:10.3390/ijms24076391)
Supplement: Supplementary file 1 [file ijms-24-06391-s001.zip › Cif of 3.cif]

data_global 
_audit_creation_date        "2023-02-27"
_audit_creation_method CRYSTALS_ver_14.61_build_6236 

_oxford_structure_analysis_title  'newPSOM_FD6541_0m in P-1'
_chemical_name_systematic         ?
_chemical_melting_point           ?

#looking for refcif 
 
 
# Check this file using the IUCr facility at: 
# http://checkcif.iucr.org/ 
 
# The content below is held in the file 'script/refcif.dat'. This is a text 
# file which you may edit to reflect local conditions. 
# Items which need looking at are represented by a '?'. 
# Items for which there are choices are prefixed with 'choose from'. 
 
_publ_contact_letter 
; 
 Please consider this CIF submission for 
 publication as a Short Format Paper in Acta 
 Crystallographica E. 
; 
_publ_contact_author_name         'Anthony Other' 
_publ_contact_author_address 
; 
 Chemical Crystallography Laboratory, 
 Department of Chemistry, 
 University of Nowhere, 
 Nowhere, NO1 4T, UK. 
; 
 
_publ_contact_author_phone        '+44 1865 000000' 
_publ_contact_author_fax          '+44 1865 000000' 
_publ_contact_author_email        'a.n.other@chem.no.ac.uk' 
_publ_requested_journal           'Section E' 
_publ_requested_category          EO # choose from: FI FM FO CI CM CO AD 
_publ_requested_coeditor_name     'Prof William Clegg' 
 
_publ_section_title 
# Title of paper - generally just the systematic or trivial name 
; ? 
; 
 
# The loop structure below should contain the names and addresses of all 
# authors, in the required order of publication. Repeat as necessary. 
loop_ 
 _publ_author_name 
 _publ_author_address 
 _publ_author_footnote 
 'Other, Anthony N.' # Author 1 
; 
 ? # Address for author 1 
; 
; 
 ? # Footnote for author 1 
; 
 'Else, S. O.' # Author 2 
; 
 ? # Address 2 
; 
; 
 ? # Footnote 2 
; 
 
 
_publ_section_abstract 
# Text of the abstract 
# (a) The Abstract must be self-contained and comprehensible 
# without the rest of the paper. This means no references 
# to atom names or to compound numbers; compounds must be 
# identified as the title compound, or by name or by some other 
# means such as derivatives of each other (e.g. "the 
# corresponding ketone"). 
# (b) The chemical formula of "the title compound" must be given. 
# (c) Any crystallographic molecular symmetry should be 
# mentioned, and also the presence of more than one molecule 
# in the asymmetric unit (i.e. anything other than Z'=1). 
; 
? 
; 
 
_publ_section_related_literature  # Not in version 2.3.1 
############################################################### 
# Essential references (e.g. to the origin of the material studied, related 
# structural studies, and to information supporting the reported structure) 
# should be cited in this section, with appropriate very brief explanatory 
# text, for example `The synthesis of the complex is described by Jones 
# (2001). The anhydrous complex has essentially the same coordination 
# geometry (Smith, 2003).' In addition, all references included in the 
# supplementary materials, but not elsewhere in the published article, 
# should be given here. The simple text `For related literature, see:...' 
# may be used, but further details should be provided in the Comment 
# section, which forms part of the supplementary material. 
############################################################### 
; 
? 
; 
 
_publ_section_comment 
# Text of the paper 
# Note that atoms are referenced as N2, not N(2) or N~2~ 
# If text containing () occur within (), the outer ones should be [] 
# Figures should be referenced as Fig. 
; 
? 
; 
_publ_section_acknowledgements    # Acknowledgments 
; 
? 
; 
_publ_section_figure_captions 
# Captions to figures - Start each caption on a new line after a blank line 
; 
Fig. 1. 
The title compound with displacement ellipsoids drawn at the 50% 
probability level. H atoms are shown as spheres of 
arbitary radius. 
 
; 
 
 
_publ_section_exptl_refinement 
# Some potentially useful phrases are donated by Bill Clegg: 
; 
In the absence of significant anomalous scattering, Friedel pairs were 
merged. 
 
The absolute configuration was arbitrarily assigned. 
 
The relatively large ratio of minimum to maximum corrections applied 
in the multiscan process (1:nnn) reflect changes in the illuminated 
volume of the crystal. 
 
Changes in illuminated volume were kept to a minimum, and were 
taken into account (G\"orbitz, 1999) by the multi-scan inter-frame 
scaling (DENZO/SCALEPACK, Otwinowski & Minor, 1997). 
 
 
G\"orbitz, C. H. (1999). Acta Cryst. B55, 1090-1098. 
 
 
 
 
The H atoms were all located in a difference map, but those 
attached to carbon atoms were repositioned geometrically. 
The H atoms were initially refined with soft restraints on the 
bond lengths and angles to regularise their geometry 
(C---H in the range 0.93--0.98, 
N---H in the range 0.86--0.89 
N---H to 0.86 
O---H = 0.82 
\%A) 
and 
U~iso~(H) (in the range 1.2-1.5 times U~eq~ of the parent atom), 
after which the positions were refined with riding constraints 
(Cooper et al, 2010). 
 
Cooper, R. I., Thompson, A. L. & Watkin, D. J. (2010). J. Appl. Cryst. 
43, 1100-1107. 
 
; 
 
_publ_section_exptl_prep 
# Brief details or a reference. Include solvent if known 
; 
? 
; 
 
# Hand-made tables can be put in the cif. The number of columns 
# is set in the loop header. 
# The contants of each column can either be a piece of text 
# without any spaces (eg a number) or other text enclosed in " " 
# Remove the leading # in the following example 
 
#_geom_extra_table_head_A 
#; 
#Table 2. 
#Molecular parameters deviating most from MOGUL averages 
#; 
# 
#loop_ 
#_geom_extra_tableA_col_1 
#_geom_extra_tableA_col_2 
#_geom_extra_tableA_col_3 
#_geom_extra_tableA_col_4 
# 
#Parameter "Observed Value" "MOGUL Value" "MOGUL e.s.d" 
#N5-C6-C4 129 124 "7 (\%)" 
#C3-O10-C2 105 109 "2 (\%)" 
#C6-O7 1.25 1.22 ".02 (\%A)" 
# 
 
data_I 
 
_exptl_special_details 
; 
 The crystal was 
placed in the cold stream of an Oxford 
Cryosystems open-flow nitrogen cryostat (Cosier & 
Glazer, 1986) with a nominal stability of 0.1K. 
 
Cosier, J. & Glazer, A.M., 1986. J. Appl. Cryst. 105-107. 
; 
_refine_special_details 
; 
? 
; 
#--------------------------------------------------------------- 
# _oxford_ data items, April 2010: 
# There is some uncertainty about the correct way of forming local data 
# names, e.g. 
 
# _atom_site_special_shape_oxford 
# or 
# _oxford_atom_site_special_shape 
 
# see: 
# http://www.iucr.org/resources/cif/spec/version1.1/semantics#namespace 
 
# A reserved prefix, e.g. foo, must be used in the following way 
# " If the data file contains items defined in a DDL1 dictionary, the 
# local data names assigned under the reserved prefix must contain it as 
# their first component, e.g. _foo_atom_site_my_item. " 
 
# However, this seems to say the opposite: 
# http://www.iucr.org/__data/iucr/cif/standard/cifstd8.html 
 
# According to advice from the IUCr, CRYSTALS is correct 
#--------------------------------------------------------------- 
# End of 'script/refcif.dat' 
#end of refcif 
_cell_length_a                    15.8519(11)
_cell_length_b                    18.1237(11)
_cell_length_c                    22.7624(16)
_cell_angle_alpha                 83.530(3)
_cell_angle_beta                  84.653(4)
_cell_angle_gamma                 86.714(4)
_cell_volume                      6462.4(8)
 
_symmetry_cell_setting            'triclinic' 
_symmetry_space_group_name_H-M    'P -1 ' 
_symmetry_space_group_name_Hall   ? 
loop_
 _symmetry_equiv_pos_as_xyz
 'x,y,z'
 '-x,-y,-z'

loop_
_atom_type_symbol
_atom_type_scat_dispersion_real
_atom_type_scat_dispersion_imag
_atom_type_scat_Cromer_Mann_a1
_atom_type_scat_Cromer_Mann_b1
_atom_type_scat_Cromer_Mann_a2
_atom_type_scat_Cromer_Mann_b2
_atom_type_scat_Cromer_Mann_a3
_atom_type_scat_Cromer_Mann_b3
_atom_type_scat_Cromer_Mann_a4
_atom_type_scat_Cromer_Mann_b4
_atom_type_scat_Cromer_Mann_c
_atom_type_scat_source  
 C       0.0033   0.0016   2.3100  20.8439   1.0200  10.2075   1.5886   0.5687
   0.8650  51.6512   0.2156 'International Tables Vol C 4.2.6.8 and 6.1.1.4'
 H       0.0000   0.0000   0.4930  10.5109   0.3229  26.1257   0.1402   3.1424
   0.0408  57.7998   0.0030 'International Tables Vol C 4.2.6.8 and 6.1.1.4'
 N       0.0061   0.0033  12.2126   0.0057   3.1322   9.8933   2.0125  28.9975
   1.1663   0.5826 -11.5290 'International Tables Vol C 4.2.6.8 and 6.1.1.4'
 O       0.0106   0.0060   3.0485  13.2771   2.2868   5.7011   1.5463   0.3239
   0.8670  32.9089   0.2508 'International Tables Vol C 4.2.6.8 and 6.1.1.4'
 Cl      0.1484   0.1585  11.4604   0.0104   7.1964   1.1662   6.2556  18.5194
   1.6455  47.7784  -9.5574 'International Tables Vol C 4.2.6.8 and 6.1.1.4'
 Fe      0.3463   0.8444  11.7695   4.7611   7.3573   0.3072   3.5222  15.3535
   2.3045  76.8805   1.0369 'International Tables Vol C 4.2.6.8 and 6.1.1.4'
 
 
_cell_formula_units_Z                    2

# Given Formula = C120 Cl12 Fe6 N24 O36 
# Dc =      1.60 Fooo =   3072.00 Mu =      9.93 M =   3113.97
# Found Formula = C102.50 H91 Cl18 Fe4 N7 O20.50 
# Dc =      1.34 FOOO =   2658.00 Mu =      8.73 M =   2610.43

_chemical_formula_sum             'C102.50 H91 Cl18 Fe4 N7 O20.50'
_chemical_formula_moiety          'C102.50 H91 Cl18 Fe4 N7 O20.50'
_chemical_compound_source                ?
_chemical_formula_weight           2610.43
 
 
_cell_measurement_reflns_used          332
_cell_measurement_theta_min             10
_cell_measurement_theta_max             20
_cell_measurement_temperature          295
 
_exptl_crystal_description        'prism' 
_exptl_crystal_colour             'brown' 
_exptl_crystal_size_min           0.140 
_exptl_crystal_size_mid           0.160 
_exptl_crystal_size_max           0.230 
 
_exptl_crystal_density_diffrn     1.341 
_exptl_crystal_density_meas       ? 
_exptl_crystal_density_method     'not measured' 
# Non-dispersive F(000): 
_exptl_crystal_F_000              2658 
_exptl_absorpt_coefficient_mu     0.873 
 
# Sheldrick geometric approximatio 0.87 0.88 
_exptl_absorpt_correction_type    numerical 
_exptl_absorpt_process_details 
; 
 Analytical Absorption (De Meulenaer & Tompa, 1965) 
; 
_exptl_absorpt_correction_T_min   0.87 
_exptl_absorpt_correction_T_max   0.88 
_diffrn_measurement_device_type   'Bruker Kappa Apex2' 
_diffrn_measurement_device        'Area' 
_diffrn_radiation_monochromator   'graphite' 
_diffrn_radiation_type            'Mo K\a'
_diffrn_radiation_wavelength           0.71073
_diffrn_measurement_method        '\f & \w scans' 
 
# If a reference occurs more than once, delete the author 
# and date from subsequent references. 
_computing_data_collection        'Apex2 (Bruker AXS, 2006)' 
_computing_cell_refinement        'Apex2 (Bruker AXS, 2006)' 
_computing_data_reduction         'Apex2 (Bruker AXS, 2006)' 
_computing_structure_solution     'Superflip (Palatinus & Chapuis, 2007)' 
_computing_structure_refinement   'CRYSTALS (Betteridge et al., 2003)' 
_computing_publication_material   'CRYSTALS (Betteridge et al., 2003)' 
_computing_molecular_graphics     'CAMERON (Watkin et al., 1996)' 
 
_diffrn_standards_interval_time   . 
_diffrn_standards_interval_count  . 
_diffrn_standards_number          0 
_diffrn_standards_decay_%         ? 
 
_diffrn_ambient_temperature        295
_diffrn_reflns_number             81474 
_reflns_number_total              24332 
_diffrn_reflns_av_R_equivalents   0.026 
# Number of reflections without Friedels Law is 0 
# Number of reflections with Friedels Law is 24332 
# Theoretical number of reflections is about 50852 
 
 
_diffrn_reflns_theta_min          0.904 
_diffrn_reflns_theta_max          26.021 
_diffrn_measured_fraction_theta_max 0.955 
 
_diffrn_reflns_theta_full         25.241 
_diffrn_measured_fraction_theta_full 0.970 
 
 
_diffrn_reflns_limit_h_min        -17 
_diffrn_reflns_limit_h_max        19 
_diffrn_reflns_limit_k_min        -21 
_diffrn_reflns_limit_k_max        21 
_diffrn_reflns_limit_l_min        -28 
_diffrn_reflns_limit_l_max        28 
_reflns_limit_h_min               -19 
_reflns_limit_h_max               19 
_reflns_limit_k_min               -21 
_reflns_limit_k_max               21 
_reflns_limit_l_min               0 
_reflns_limit_l_max               28 
 
_oxford_diffrn_Wilson_B_factor    2.94 
_oxford_diffrn_Wilson_scale       240.36 
 
_atom_sites_solution_primary      Other  #heavy,direct,difmap,geom,iterative
# _atom_sites_solution_secondary  difmap
_atom_sites_solution_hydrogens    difmap
 
_refine_diff_density_min          -0.45 
_refine_diff_density_max          0.69 
 
 
# The current dictionary definitions do not cover the 
# situation where the reflections used for refinement were 
# selected by a user-defined sigma threshold 
 
 
# The values actually used during refinement 
_oxford_reflns_threshold_expression_ref     I>2.0\s(I)
_refine_ls_number_reflns          16440 
_refine_ls_number_restraints      3 
_refine_ls_number_parameters      1543 
_oxford_refine_ls_R_factor_ref    0.0519 
_refine_ls_wR_factor_ref          0.0771 
_refine_ls_goodness_of_fit_ref    1.0002 
_refine_ls_shift/su_max           0.0006112 
_refine_ls_shift/su_mean          0.0000253 
 
 
# The values computed with all filters except I/sigma 
_oxford_reflns_number_all         24226 
_refine_ls_R_factor_all           0.0947 
_refine_ls_wR_factor_all          0.0850 
 
# The values computed with a 2 sigma cutoff - a la SHELX 
_reflns_threshold_expression      I>2.0\s(I)
_reflns_number_gt                 16440 
_refine_ls_R_factor_gt            0.0519 
_refine_ls_wR_factor_gt           0.0771 
 
# choose from: rm (reference molecule of known chirality), 
# ad (anomolous dispersion - Flack), rmad (rm and ad), 
# syn (from synthesis), unk (unknown) or . (not applicable). 
_chemical_absolute_configuration  '.' 
 
 
_refine_ls_structure_factor_coef  Fsqd 
_refine_ls_matrix_type            full
_refine_ls_hydrogen_treatment     constr         #undef, noref, refall,
                                                 # refxyz, refU, constr or mixed
_refine_ls_weighting_scheme       calc 
_refine_ls_weighting_details 
;
 Method, part 1, Chebychev polynomial, (Watkin, 1994, Prince, 1982) 
 [weight] = 1.0/[A~0~*T~0~(x)+A~1~*T~1~(x) ... +A~n-1~]*T~n-1~(x)] 
 where A~i~ are the Chebychev coefficients listed below and x= Fcalc/Fmax 
 Method = Robust Weighting (Prince, 1982) 
 W = [weight] * [1-(deltaF/6*sigmaF)^2^]^2^ 
 A~i~ are: 
 2.38 2.80 1.11 
;
# Insert your own references if required - in alphabetical order 
_publ_section_references 
; 
Betteridge, P.W., Carruthers, J.R., Cooper, R.I., 
Prout, K. & Watkin, D.J. (2003). J. Appl. Cryst. 36, 1487. 
 
Bruker Analytical X-ray Systems, Inc., 2006. <i>Apex2</i>, 
Version 2 User Manual, M86-E01078, Madison, WI. 
 
De Meulenaer, J. & Tompa, H. (1965). Acta Cryst. 19, 1014. 
 
Palatinus, L. & Chapuis, G. (2007). J. Appl. Cryst. 40, 786-790. 
 
Prince, E. 
Mathematical Techniques in Crystallography 
and Materials Science 
Springer-Verlag, New York, 1982. 
 
Watkin D.J. (1994). 
Acta Cryst, A50, 411-437. 
 
Watkin, D.J., Prout, C.K. & Pearce, L.J. (1996). CAMERON, Chemical 
Crystallography Laboratory, Oxford, UK. 
; 

# Uequiv = arithmetic mean of Ui i.e. Ueqiv = (U1+U2+U3)/3

# Replace last . with number of unfound hydrogen atoms attached to an atom.

# ..._refinement_flags_... 
# . no refinement constraints           S special position constraint on site
# G rigid group refinement of site      R riding atom
# D distance or angle restraint on site T thermal displacement constraints
# U Uiso or Uij restraint (rigid bond)  P partial occupancy constraint


loop_
_atom_site_label
_atom_site_type_symbol
_atom_site_fract_x
_atom_site_fract_y
_atom_site_fract_z
_atom_site_U_iso_or_equiv
_atom_site_occupancy
_atom_site_adp_type
_atom_site_refinement_flags_posn
_atom_site_refinement_flags_adp
_atom_site_refinement_flags_occupancy
_atom_site_disorder_assembly
_atom_site_disorder_group
_atom_site_attached_hydrogens
Fe1 Fe 0.27659(3) 0.29262(3) 0.31756(2) 0.0347 1.0000 Uani . . . . . . 
Fe2 Fe 0.29917(3) 0.31989(3) 0.17278(2) 0.0397 1.0000 Uani . . . . . . 
Fe3 Fe 0.25423(3) 0.15351(3) 0.24024(2) 0.0372 1.0000 Uani . . . . . . 
Fe4 Fe 0.75300(4) 0.19409(3) 0.24490(2) 0.0493 1.0000 Uani . . . . . . 
O1 O 0.27725(14) 0.25462(12) 0.24479(9) 0.0359 1.0000 Uani . . . . . . 
O2 O 0.19739(14) 0.37991(13) 0.29382(10) 0.0377 1.0000 Uani . . . . . . 
O3 O 0.21371(15) 0.40070(13) 0.20190(10) 0.0424 1.0000 Uani . . . . . . 
O4 O 0.17944(14) 0.23313(12) 0.35689(9) 0.0364 1.0000 Uani . . . . . . 
O5 O 0.14833(14) 0.15434(13) 0.29723(10) 0.0368 1.0000 Uani . . . . . . 
O6 O 0.35712(14) 0.13650(13) 0.18188(10) 0.0399 1.0000 Uani . . . . . . 
O7 O 0.38004(15) 0.24336(15) 0.13416(10) 0.0417 1.0000 Uani . . . . . . 
O8 O 0.26989(14) 0.33247(12) 0.39905(10) 0.0369 1.0000 Uani . . . . . . 
O9 O 0.32387(15) 0.39125(13) 0.09578(10) 0.0413 1.0000 Uani . . . . . . 
O10 O 0.23581(14) 0.04336(13) 0.23238(10) 0.0403 1.0000 Uani . . . . . . 
O11 O 0.37524(14) 0.35767(13) 0.29655(10) 0.0388 1.0000 Uani . . . . . . 
O12 O 0.39907(14) 0.36469(13) 0.20274(10) 0.0421 1.0000 Uani . . . . . . 
O13 O 0.36453(14) 0.21183(13) 0.34529(9) 0.0357 1.0000 Uani . . . . . . 
O14 O 0.32958(14) 0.11557(12) 0.30554(10) 0.0368 1.0000 Uani . . . . . . 
O15 O 0.17531(15) 0.17712(14) 0.17395(10) 0.0409 1.0000 Uani . . . . . . 
O16 O 0.20302(15) 0.28374(13) 0.13127(10) 0.0407 1.0000 Uani . . . . . . 
O17 O 0.0828(2) 0.00571(18) 0.22063(14) 0.0744 1.0000 Uani . . . . . . 
O18 O 0.0021(4) 0.3044(4) 0.2386(3) 0.087(2) 0.5000 Uiso . . . . . . 
O19 O 0.4975(4) 0.2897(3) 0.4817(3) 0.0610 0.5000 Uani . . . . . . 
O20 O 0.3986(4) 0.3813(4) 0.4856(3) 0.0730 0.5000 Uani . . . . . . 
O21 O 0.1074(4) 0.5072(3) -0.0137(3) 0.0646 0.5000 Uani . . . . . . 
O22 O 0.2124(4) 0.4646(3) 0.0287(3) 0.0590 0.5000 Uani . . . . . . 
O23 O 0.500000(10) 0.500000(10) 0.500000(10) 0.0795 1.0000 Uani S . . . . . 
O24 O 0.0634(5) 0.8515(4) 0.2673(3) 0.101(2) 0.5000 Uiso . . . . . . 
N1 N 0.1929(2) 0.5638(2) 0.31900(16) 0.0650 1.0000 Uani . . . . . . 
N2 N 0.14949(19) 0.12412(17) 0.48011(14) 0.0463 1.0000 Uani . . . . . . 
N3 N 0.4273(2) 0.18996(19) 0.00197(15) 0.0576 1.0000 Uani . . . . . . 
N4 N 0.4356(2) 0.5586(2) 0.22360(15) 0.0587 1.0000 Uani . . . . . . 
N5 N 0.35115(18) -0.01474(17) 0.40266(13) 0.0426 1.0000 Uani . . . . . . 
N6 N 0.1749(2) 0.1301(2) 0.03347(15) 0.0590 1.0000 Uani . . . . . . 
N7 N 0.3180(4) 0.4237(4) 0.6022(3) 0.0581 0.5000 Uani . . . . . . 
N8 N 0.0548(5) 0.6211(4) 0.0750(3) 0.0636 0.5000 Uani . . . . . . 
Cl1 Cl 0.78339(6) 0.27960(6) 0.17223(4) 0.0537 1.0000 Uani . . . . . . 
Cl2 Cl 0.63536(6) 0.22444(6) 0.29298(4) 0.0541 1.0000 Uani . . . . . . 
Cl3 Cl 0.85748(6) 0.18355(6) 0.30109(4) 0.0539 1.0000 Uani . . . . . . 
Cl4 Cl 0.74164(6) 0.08415(6) 0.21642(4) 0.0537 1.0000 Uani . . . . . . 
Cl5 Cl 0.35176(8) 0.51102(7) 0.37562(5) 0.0706 1.0000 Uani . . . . . . 
Cl6 Cl 0.11096(8) 0.70958(7) 0.30662(5) 0.0744 1.0000 Uani . . . . . . 
Cl7 Cl 0.32948(6) 0.15508(6) 0.48437(4) 0.0522 1.0000 Uani . . . . . . 
Cl8 Cl 0.04262(6) 0.02232(6) 0.56389(4) 0.0539 1.0000 Uani . . . . . . 
Cl9 Cl 0.52528(7) 0.10113(7) -0.08767(5) 0.0684 1.0000 Uani . . . . . . 
Cl10 Cl 0.27832(7) 0.29671(6) -0.01729(5) 0.0620 1.0000 Uani . . . . . . 
Cl11 Cl 0.29665(8) 0.56579(7) 0.14762(5) 0.0670 1.0000 Uani . . . . . . 
Cl12 Cl 0.49788(8) 0.67552(7) 0.28566(5) 0.0681 1.0000 Uani . . . . . . 
Cl13 Cl 0.17305(6) -0.02865(5) 0.38221(4) 0.0480 1.0000 Uani . . . . . . 
Cl14 Cl 0.45140(6) -0.09194(6) 0.49893(4) 0.0492 1.0000 Uani . . . . . . 
Cl15 Cl 0.29213(8) 0.01352(7) 0.08536(5) 0.0712 1.0000 Uani . . . . . . 
Cl16 Cl 0.13019(7) 0.16309(7) -0.08934(5) 0.0671 1.0000 Uani . . . . . . 
Cl17 Cl 0.25798(14) 0.53525(13) 0.50980(10) 0.0650 0.5000 Uani . . . . . . 
Cl18 Cl 0.31784(14) 0.44191(14) 0.73418(10) 0.0680 0.5000 Uani . . . . . . 
Cl19 Cl 0.11684(15) 0.71392(13) -0.02759(10) 0.0644 0.5000 Uani . . . . . . 
Cl20 Cl 0.01025(15) 0.65600(12) 0.20076(10) 0.0635 0.5000 Uani . . . . . . 
C1 C 0.1785(2) 0.4115(2) 0.24938(17) 0.0428 1.0000 Uani . . . . . . 
C2 C 0.1109(2) 0.4728(2) 0.24644(17) 0.0500 1.0000 Uani . . . . . . 
C3 C 0.0721(3) 0.4917(2) 0.30607(18) 0.0553 1.0000 Uani . . . . . . 
C4 C -0.0063(3) 0.4635(2) 0.32710(18) 0.0570 1.0000 Uani . . . . . . 
C5 C -0.0430(3) 0.4830(2) 0.38168(18) 0.0574 1.0000 Uani . . . . . . 
C6 C -0.0043(3) 0.5286(2) 0.41489(19) 0.0586 1.0000 Uani . . . . . . 
C7 C 0.0746(3) 0.5551(2) 0.39314(18) 0.0602 1.0000 Uani . . . . . . 
C8 C 0.1131(3) 0.5372(2) 0.33875(18) 0.0573 1.0000 Uani . . . . . . 
C9 C 0.2315(3) 0.6155(3) 0.3447(2) 0.0660 1.0000 Uani . . . . . . 
C10 C 0.3050(3) 0.5977(3) 0.3746(2) 0.0664 1.0000 Uani . . . . . . 
C11 C 0.3406(3) 0.6520(3) 0.4024(2) 0.0680 1.0000 Uani . . . . . . 
C12 C 0.3038(3) 0.7236(3) 0.4026(2) 0.0713 1.0000 Uani . . . . . . 
C13 C 0.2313(3) 0.7424(3) 0.3729(2) 0.0696 1.0000 Uani . . . . . . 
C14 C 0.1965(3) 0.6880(3) 0.3451(2) 0.0714 1.0000 Uani . . . . . . 
C15 C 0.1356(2) 0.18531(19) 0.33893(15) 0.0379 1.0000 Uani . . . . . . 
C16 C 0.0572(2) 0.1697(2) 0.38037(15) 0.0404 1.0000 Uani . . . . . . 
C17 C 0.0412(2) 0.2049(2) 0.43741(15) 0.0403 1.0000 Uani . . . . . . 
C18 C -0.0195(2) 0.2632(2) 0.44103(16) 0.0425 1.0000 Uani . . . . . . 
C19 C -0.0372(2) 0.2973(2) 0.49314(16) 0.0457 1.0000 Uani . . . . . . 
C20 C 0.0075(2) 0.2685(2) 0.54101(16) 0.0450 1.0000 Uani . . . . . . 
C21 C 0.0687(2) 0.2108(2) 0.53779(16) 0.0434 1.0000 Uani . . . . . . 
C22 C 0.0863(2) 0.1777(2) 0.48519(16) 0.0425 1.0000 Uani . . . . . . 
C23 C 0.1874(2) 0.0870(2) 0.52685(17) 0.0469 1.0000 Uani . . . . . . 
C24 C 0.2728(2) 0.0950(2) 0.53302(17) 0.0485 1.0000 Uani . . . . . . 
C25 C 0.3143(3) 0.0544(2) 0.57832(16) 0.0492 1.0000 Uani . . . . . . 
C26 C 0.2713(2) 0.0048(2) 0.62027(17) 0.0497 1.0000 Uani . . . . . . 
C27 C 0.1864(2) -0.0046(2) 0.61622(17) 0.0504 1.0000 Uani . . . . . . 
C28 C 0.1485(2) 0.0366(2) 0.56961(17) 0.0485 1.0000 Uani . . . . . . 
C29 C 0.3983(2) 0.1827(2) 0.14439(16) 0.0437 1.0000 Uani . . . . . . 
C30 C 0.4727(2) 0.1392(2) 0.11566(16) 0.0471 1.0000 Uani . . . . . . 
C31 C 0.5271(2) 0.1899(2) 0.07317(17) 0.0499 1.0000 Uani . . . . . . 
C32 C 0.6014(2) 0.2163(2) 0.08887(18) 0.0547 1.0000 Uani . . . . . . 
C33 C 0.6498(3) 0.2652(2) 0.04995(18) 0.0571 1.0000 Uani . . . . . . 
C34 C 0.6255(3) 0.2887(2) -0.00680(18) 0.0565 1.0000 Uani . . . . . . 
C35 C 0.5517(3) 0.2629(2) -0.02364(18) 0.0572 1.0000 Uani . . . . . . 
C36 C 0.5048(3) 0.2130(2) 0.01642(18) 0.0538 1.0000 Uani . . . . . . 
C37 C 0.4043(3) 0.2015(3) -0.05804(18) 0.0582 1.0000 Uani . . . . . . 
C38 C 0.3369(3) 0.2511(2) -0.06986(19) 0.0580 1.0000 Uani . . . . . . 
C39 C 0.3119(3) 0.2633(3) -0.12730(19) 0.0614 1.0000 Uani . . . . . . 
C40 C 0.3560(3) 0.2252(3) -0.17110(19) 0.0616 1.0000 Uani . . . . . . 
C41 C 0.4229(3) 0.1754(3) -0.15793(19) 0.0631 1.0000 Uani . . . . . . 
C42 C 0.4498(3) 0.1616(3) -0.10084(19) 0.0624 1.0000 Uani . . . . . . 
C43 C 0.2001(2) 0.36041(19) 0.43553(15) 0.0397 1.0000 Uani . . . . . . 
C44 C 0.4066(2) 0.4096(2) 0.06790(15) 0.0439 1.0000 Uani . . . . . . 
C45 C 0.2894(2) -0.02006(19) 0.24789(15) 0.0404 1.0000 Uani . . . . . . 
C46 C 0.4178(2) 0.3747(2) 0.25056(16) 0.0410 1.0000 Uani . . . . . . 
C47 C 0.5016(2) 0.4087(2) 0.25412(16) 0.0453 1.0000 Uani . . . . . . 
C48 C 0.5348(2) 0.4553(2) 0.19920(17) 0.0489 1.0000 Uani . . . . . . 
C49 C 0.5968(2) 0.4254(2) 0.16016(17) 0.0524 1.0000 Uani . . . . . . 
C50 C 0.6232(3) 0.4732(2) 0.11048(18) 0.0540 1.0000 Uani . . . . . . 
C51 C 0.5936(3) 0.5459(2) 0.09529(19) 0.0572 1.0000 Uani . . . . . . 
C52 C 0.5316(3) 0.5717(2) 0.13589(18) 0.0542 1.0000 Uani . . . . . . 
C53 C 0.5012(3) 0.5275(2) 0.18650(18) 0.0524 1.0000 Uani . . . . . . 
C54 C 0.3934(3) 0.6247(3) 0.21390(19) 0.0610 1.0000 Uani . . . . . . 
C55 C 0.4185(3) 0.6852(3) 0.2400(2) 0.0641 1.0000 Uani . . . . . . 
C56 C 0.3778(3) 0.7555(3) 0.2303(2) 0.0643 1.0000 Uani . . . . . . 
C57 C 0.3119(3) 0.7687(3) 0.19363(19) 0.0630 1.0000 Uani . . . . . . 
C58 C 0.2861(3) 0.7091(3) 0.1675(2) 0.0627 1.0000 Uani . . . . . . 
C59 C 0.3263(3) 0.6402(3) 0.17789(19) 0.0609 1.0000 Uani . . . . . . 
C60 C 0.3803(2) 0.1532(2) 0.33372(14) 0.0369 1.0000 Uani . . . . . . 
C61 C 0.4540(2) 0.10491(19) 0.35415(15) 0.0397 1.0000 Uani . . . . . . 
C62 C 0.4726(2) 0.0273(2) 0.33759(15) 0.0397 1.0000 Uani . . . . . . 
C63 C 0.5413(2) 0.0116(2) 0.29730(15) 0.0408 1.0000 Uani . . . . . . 
C64 C 0.5624(2) -0.0614(2) 0.28625(16) 0.0427 1.0000 Uani . . . . . . 
C65 C 0.5160(2) -0.1202(2) 0.31431(15) 0.0415 1.0000 Uani . . . . . . 
C66 C 0.4469(2) -0.1044(2) 0.35375(15) 0.0417 1.0000 Uani . . . . . . 
C67 C 0.4247(2) -0.0315(2) 0.36540(15) 0.0402 1.0000 Uani . . . . . . 
C68 C 0.3100(2) -0.0661(2) 0.44352(16) 0.0431 1.0000 Uani . . . . . . 
C69 C 0.3485(2) -0.1072(2) 0.48976(16) 0.0445 1.0000 Uani . . . . . . 
C70 C 0.3031(2) -0.1546(2) 0.53139(17) 0.0462 1.0000 Uani . . . . . . 
C71 C 0.2174(2) -0.1609(2) 0.52674(17) 0.0471 1.0000 Uani . . . . . . 
C72 C 0.1777(2) -0.1206(2) 0.48085(16) 0.0464 1.0000 Uani . . . . . . 
C73 C 0.2244(2) -0.0731(2) 0.43942(16) 0.0448 1.0000 Uani . . . . . . 
C74 C 0.1618(2) 0.2319(2) 0.13875(16) 0.0395 1.0000 Uani . . . . . . 
C75 C 0.0872(2) 0.2348(2) 0.10128(17) 0.0474 1.0000 Uani . . . . . . 
C76 C 0.0507(2) 0.1609(2) 0.09668(17) 0.0503 1.0000 Uani . . . . . . 
C77 C -0.0275(2) 0.1424(2) 0.12521(17) 0.0523 1.0000 Uani . . . . . . 
C78 C -0.0607(3) 0.0743(2) 0.11952(18) 0.0551 1.0000 Uani . . . . . . 
C79 C -0.0174(3) 0.0237(2) 0.08494(17) 0.0549 1.0000 Uani . . . . . . 
C80 C 0.0602(3) 0.0426(2) 0.05572(17) 0.0533 1.0000 Uani . . . . . . 
C81 C 0.0947(3) 0.1106(2) 0.06166(17) 0.0514 1.0000 Uani . . . . . . 
C82 C 0.2155(3) 0.0830(3) -0.0066(2) 0.0599 1.0000 Uani . . . . . . 
C83 C 0.2028(3) 0.0964(3) -0.0666(2) 0.0614 1.0000 Uani . . . . . . 
C84 C 0.2490(3) 0.0532(3) -0.1061(2) 0.0641 1.0000 Uani . . . . . . 
C85 C 0.3060(3) -0.0038(3) -0.0870(2) 0.0641 1.0000 Uani . . . . . . 
C86 C 0.3183(3) -0.0173(3) -0.0270(2) 0.0643 1.0000 Uani . . . . . . 
C87 C 0.2736(3) 0.0268(3) 0.0127(2) 0.0645 1.0000 Uani . . . . . . 
C88 C 0.4390(6) 0.3221(5) 0.5090(4) 0.0610 0.5000 Uani . . . . . . 
C89 C 0.4138(5) 0.2949(5) 0.5733(4) 0.0607 0.5000 Uani . . . . . . 
C90 C 0.3314(5) 0.2905(5) 0.6087(4) 0.0554 0.5000 Uani . . . . . . 
C91 C 0.3012(6) 0.2219(5) 0.6334(4) 0.0619 0.5000 Uani . . . . . . 
C92 C 0.2252(6) 0.2134(5) 0.6692(4) 0.0606 0.5000 Uani . . . . . . 
C93 C 0.1759(6) 0.2755(5) 0.6817(4) 0.0637 0.5000 Uani . . . . . . 
C94 C 0.2065(6) 0.3449(5) 0.6567(4) 0.0606 0.5000 Uani . . . . . . 
C95 C 0.2824(5) 0.3553(5) 0.6204(4) 0.0599 0.5000 Uani . . . . . . 
C96 C 0.2872(5) 0.4922(5) 0.6226(4) 0.0573 0.5000 Uani . . . . . . 
C97 C 0.2870(5) 0.5084(5) 0.6814(4) 0.0634 0.5000 Uani . . . . . . 
C98 C 0.2606(5) 0.5797(5) 0.6959(4) 0.0643 0.5000 Uani . . . . . . 
C99 C 0.2370(5) 0.6368(5) 0.6536(4) 0.0633 0.5000 Uani . . . . . . 
C100 C 0.2373(5) 0.6216(5) 0.5950(4) 0.0643 0.5000 Uani . . . . . . 
C101 C 0.2619(5) 0.5504(5) 0.5804(4) 0.0616 0.5000 Uani . . . . . . 
C102 C 0.1316(6) 0.4781(5) 0.0344(4) 0.0616 0.5000 Uani . . . . . . 
C103 C 0.0898(6) 0.4572(5) 0.0943(4) 0.0624 0.5000 Uani . . . . . . 
C104 C 0.0025(6) 0.4964(5) 0.0991(4) 0.0612 0.5000 Uani . . . . . . 
C105 C -0.0634(6) 0.4478(5) 0.1147(4) 0.0669 0.5000 Uani . . . . . . 
C106 C -0.1456(6) 0.4791(5) 0.1227(4) 0.0609 0.5000 Uani . . . . . . 
C107 C -0.1622(6) 0.5546(5) 0.1166(4) 0.0627 0.5000 Uani . . . . . . 
C108 C -0.0969(6) 0.6036(5) 0.1001(4) 0.0633 0.5000 Uani . . . . . . 
C109 C -0.0140(6) 0.5733(5) 0.0921(4) 0.0603 0.5000 Uani . . . . . . 
C110 C 0.0643(6) 0.6957(5) 0.0866(4) 0.0648 0.5000 Uani . . . . . . 
C111 C 0.0967(6) 0.7473(5) 0.0402(4) 0.0635 0.5000 Uani . . . . . . 
C112 C 0.1134(6) 0.8190(5) 0.0483(4) 0.0603 0.5000 Uani . . . . . . 
C113 C 0.0949(6) 0.8384(5) 0.1055(4) 0.0609 0.5000 Uani . . . . . . 
C114 C 0.0618(5) 0.7896(5) 0.1522(4) 0.0617 0.5000 Uani . . . . . . 
C115 C 0.0467(6) 0.7169(5) 0.1440(4) 0.0626 0.5000 Uani . . . . . . 
C116 C 0.0043(3) 0.0119(3) 0.2552(2) 0.0808 1.0000 Uani . . . . . . 
C117 C -0.0338(7) 0.3581(6) 0.1956(5) 0.087(3) 0.5000 Uiso . . . . . . 
H11 H 0.2204 0.5436 0.2919 0.0698 1.0000 Uiso R . . . . . 
H21 H 0.1351 0.5180 0.2270 0.0568 1.0000 Uiso R . . . . . 
H22 H 0.0678 0.4581 0.2233 0.0569 1.0000 Uiso R . . . . . 
H31 H 0.3938 0.1701 0.0284 0.0648 1.0000 Uiso R . . . . . 
H41 H -0.0322 0.4313 0.3063 0.0640 1.0000 Uiso R . . . . . 
H51 H -0.0944 0.4640 0.3967 0.0640 1.0000 Uiso R . . . . . 
H61 H -0.0289 0.5417 0.4511 0.0652 1.0000 Uiso R . . . . . 
H71 H 0.3675 0.4242 0.5826 0.0670 0.5000 Uiso R . . . . . 
H81 H 0.3220 0.3394 0.4133 0.0433 1.0000 Uiso R . . . . . 
H91 H 0.2856 0.4256 0.0901 0.0610 1.0000 Uiso R . . . . . 
H101 H 0.2381 0.0505 0.1960 0.0570 1.0000 Uiso R . . . . . 
H111 H 0.3888 0.6391 0.4225 0.0750 1.0000 Uiso R . . . . . 
H121 H 0.3275 0.7585 0.4226 0.0760 1.0000 Uiso R . . . . . 
H131 H 0.2059 0.7896 0.3720 0.0761 1.0000 Uiso R . . . . . 
H161 H 0.0650 0.1179 0.3934 0.0480 1.0000 Uiso R . . . . . 
H162 H 0.0095 0.1777 0.3567 0.0477 1.0000 Uiso R . . . . . 
H171 H 0.1206 0.0069 0.2363 0.1394 1.0000 Uiso R . . . . . 
H181 H -0.0484 0.2814 0.4084 0.0490 1.0000 Uiso R . . . . . 
H191 H -0.0778 0.3357 0.4962 0.0491 1.0000 Uiso R . . . . . 
H201 H -0.0044 0.2911 0.5757 0.0500 1.0000 Uiso R . . . . . 
H211 H 0.0982 0.1936 0.5699 0.0500 1.0000 Uiso R . . . . . 
H232 H 0.4497 0.4972 0.5119 0.0926 0.5000 Uiso R . . . . . 
H234 H 0.5138 0.4673 0.4784 0.0926 0.5000 Uiso R . . . . . 
H243 H 0.1011 0.8279 0.2485 0.1163 0.5000 Uiso R . . . . . 
H244 H 0.0454 0.8251 0.2975 0.1163 0.5000 Uiso R . . . . . 
H251 H 0.3712 0.0608 0.5806 0.0571 1.0000 Uiso R . . . . . 
H261 H 0.2991 -0.0204 0.6511 0.0571 1.0000 Uiso R . . . . . 
H271 H 0.1565 -0.0375 0.6435 0.0581 1.0000 Uiso R . . . . . 
H301 H 0.4525 0.1020 0.0943 0.0549 1.0000 Uiso R . . . . . 
H302 H 0.5068 0.1154 0.1460 0.0550 1.0000 Uiso R . . . . . 
H321 H 0.6208 0.2007 0.1258 0.0602 1.0000 Uiso R . . . . . 
H331 H 0.6986 0.2840 0.0613 0.0612 1.0000 Uiso R . . . . . 
H341 H 0.6565 0.3222 -0.0331 0.0621 1.0000 Uiso R . . . . . 
H351 H 0.5323 0.2777 -0.0608 0.0620 1.0000 Uiso R . . . . . 
H391 H 0.2672 0.2968 -0.1361 0.0689 1.0000 Uiso R . . . . . 
H401 H 0.3399 0.2327 -0.2095 0.0690 1.0000 Uiso R . . . . . 
H411 H 0.4506 0.1497 -0.1879 0.0701 1.0000 Uiso R . . . . . 
H431 H 0.1767 0.3192 0.4599 0.0433 1.0000 Uiso R . . . . . 
H432 H 0.1582 0.3843 0.4117 0.0433 1.0000 Uiso R . . . . . 
H433 H 0.2184 0.3946 0.4599 0.0433 1.0000 Uiso R . . . . . 
H441 H 0.4243 0.4521 0.0841 0.0609 1.0000 Uiso R . . . . . 
H442 H 0.3923 0.4266 0.0314 0.0610 1.0000 Uiso R . . . . . 
H443 H 0.4492 0.3702 0.0723 0.0609 1.0000 Uiso R . . . . . 
H451 H 0.2965 -0.0237 0.2891 0.0486 1.0000 Uiso R . . . . . 
H452 H 0.2644 -0.0635 0.2392 0.0486 1.0000 Uiso R . . . . . 
H453 H 0.3430 -0.0153 0.2258 0.0486 1.0000 Uiso R . . . . . 
H471 H 0.5426 0.3684 0.2623 0.0530 1.0000 Uiso R . . . . . 
H472 H 0.4961 0.4395 0.2862 0.0528 1.0000 Uiso R . . . . . 
H491 H 0.6201 0.3779 0.1686 0.0581 1.0000 Uiso R . . . . . 
H501 H 0.6654 0.4537 0.0848 0.0591 1.0000 Uiso R . . . . . 
H511 H 0.6145 0.5743 0.0633 0.0601 1.0000 Uiso R . . . . . 
H521 H 0.5081 0.6190 0.1269 0.0610 1.0000 Uiso R . . . . . 
H561 H 0.3960 0.7950 0.2481 0.0711 1.0000 Uiso R . . . . . 
H571 H 0.2849 0.8152 0.1878 0.0710 1.0000 Uiso R . . . . . 
H581 H 0.2422 0.7156 0.1427 0.0710 1.0000 Uiso R . . . . . 
H611 H 0.5039 0.1311 0.3395 0.0462 1.0000 Uiso R . . . . . 
H612 H 0.4489 0.1013 0.3968 0.0459 1.0000 Uiso R . . . . . 
H631 H 0.5724 0.0503 0.2781 0.0483 1.0000 Uiso R . . . . . 
H641 H 0.6084 -0.0701 0.2592 0.0480 1.0000 Uiso R . . . . . 
H651 H 0.5302 -0.1686 0.3064 0.0480 1.0000 Uiso R . . . . . 
H661 H 0.4152 -0.1431 0.3727 0.0491 1.0000 Uiso R . . . . . 
H701 H 0.3300 -0.1805 0.5621 0.0529 1.0000 Uiso R . . . . . 
H711 H 0.1867 -0.1923 0.5540 0.0531 1.0000 Uiso R . . . . . 
H721 H 0.1208 -0.1265 0.4779 0.0532 1.0000 Uiso R . . . . . 
H751 H 0.1031 0.2575 0.0621 0.0548 1.0000 Uiso R . . . . . 
H752 H 0.0434 0.2655 0.1206 0.0548 1.0000 Uiso R . . . . . 
H771 H -0.0574 0.1748 0.1490 0.0591 1.0000 Uiso R . . . . . 
H781 H -0.1132 0.0626 0.1390 0.0592 1.0000 Uiso R . . . . . 
H791 H -0.0394 -0.0210 0.0801 0.0600 1.0000 Uiso R . . . . . 
H801 H 0.0898 0.0097 0.0320 0.0609 1.0000 Uiso R . . . . . 
H841 H 0.2395 0.0643 -0.1459 0.0720 1.0000 Uiso R . . . . . 
H851 H 0.3348 -0.0322 -0.1147 0.0720 1.0000 Uiso R . . . . . 
H861 H 0.3574 -0.0551 -0.0160 0.0730 1.0000 Uiso R . . . . . 
H891 H 0.4404 0.3343 0.5889 0.0681 0.5000 Uiso R . . . . . 
H892 H 0.4441 0.2482 0.5837 0.0679 0.5000 Uiso R . . . . . 
H911 H 0.3344 0.1798 0.6251 0.0671 0.5000 Uiso R . . . . . 
H921 H 0.2085 0.1661 0.6840 0.0669 0.5000 Uiso R . . . . . 
H931 H 0.1256 0.2715 0.7058 0.0670 0.5000 Uiso R . . . . . 
H941 H 0.1732 0.3869 0.6650 0.0670 0.5000 Uiso R . . . . . 
H981 H 0.2589 0.5907 0.7349 0.0691 0.5000 Uiso R . . . . . 
H991 H 0.2183 0.6835 0.6635 0.0690 0.5000 Uiso R . . . . . 
H1001 H 0.2188 0.6569 0.5658 0.0690 0.5000 Uiso R . . . . . 
H1031 H 0.0786 0.4050 0.0951 0.0680 0.5000 Uiso R . . . . . 
H1032 H 0.1199 0.4648 0.1281 0.0680 0.5000 Uiso R . . . . . 
H1051 H -0.0560 0.3970 0.1119 0.0680 0.5000 Uiso R . . . . . 
H1061 H -0.1922 0.4495 0.1280 0.0680 0.5000 Uiso R . . . . . 
H1071 H -0.2161 0.5759 0.1250 0.0681 0.5000 Uiso R . . . . . 
H1081 H -0.1042 0.6544 0.1030 0.0680 0.5000 Uiso R . . . . . 
H1121 H 0.1338 0.8520 0.0168 0.0680 0.5000 Uiso R . . . . . 
H1131 H 0.1052 0.8866 0.1121 0.0680 0.5000 Uiso R . . . . . 
H1141 H 0.0523 0.8057 0.1896 0.0671 0.5000 Uiso R . . . . . 
H1161 H -0.0001 0.0581 0.2716 0.0961 1.0000 Uiso R . . . . . 
H1162 H 0.0007 -0.0276 0.2864 0.0961 1.0000 Uiso R . . . . . 
H1163 H -0.0405 0.0097 0.2306 0.0961 1.0000 Uiso R . . . . . 
H1171 H 0.0003 0.3955 0.1730 0.1093 0.5000 Uiso R . . . . . 
H1172 H -0.0858 0.3836 0.2104 0.1093 0.5000 Uiso R . . . . . 
H1173 H -0.0513 0.3271 0.1665 0.1093 0.5000 Uiso R . . . . . 
H1183 H 0.1012 0.5870 0.4142 0.0650 1.0000 Uiso R . . . . . 
H1184 H 0.0908 0.6018 0.0492 0.0680 0.5000 Uiso R . . . . . 
H1185 H 0.4129 0.5264 0.2501 0.0659 1.0000 Uiso R . . . . . 
H1186 H 0.3512 0.0284 0.4145 0.0499 1.0000 Uiso R . . . . . 
H1187 H 0.2002 0.1648 0.0437 0.0653 1.0000 Uiso R . . . . . 
H1188 H 0.1656 0.1104 0.4461 0.0529 1.0000 Uiso R . . . . . 
H1189 H 0.3959 0.4175 0.4607 0.0676 0.5000 Uiso R . . . . . 
H1190 H -0.0384 0.2762 0.2518 0.1063 0.5000 Uiso R . . . . . 
H221 H 0.2293 0.4223 0.0112 0.0716 0.5000 Uiso R . . . . . 
loop_
_atom_site_aniso_label
_atom_site_aniso_U_11
_atom_site_aniso_U_22
_atom_site_aniso_U_33
_atom_site_aniso_U_23
_atom_site_aniso_U_13
_atom_site_aniso_U_12
Fe1 0.0349(3) 0.0390(3) 0.0345(3) -0.0143(2) -0.0075(2) -0.0109(2) 
Fe2 0.0412(3) 0.0441(3) 0.0367(3) -0.0111(2) -0.0061(2) -0.0083(2) 
Fe3 0.0382(3) 0.0412(3) 0.0364(3) -0.0150(2) -0.0081(2) -0.0098(2) 
Fe4 0.0469(3) 0.0549(4) 0.0443(3) 0.0038(3) -0.0014(3) -0.0099(3) 
O1 0.0366(13) 0.0404(14) 0.0343(12) -0.0129(10) -0.0056(10) -0.0103(10) 
O2 0.0372(13) 0.0409(14) 0.0380(14) -0.0120(11) -0.0076(11) -0.0063(11) 
O3 0.0476(15) 0.0430(15) 0.0387(14) -0.0105(11) -0.0064(12) -0.0053(12) 
O4 0.0361(13) 0.0429(14) 0.0338(12) -0.0123(10) -0.0052(10) -0.0127(11) 
O5 0.0364(13) 0.0401(14) 0.0378(13) -0.0134(11) -0.0067(10) -0.0105(11) 
O6 0.0414(14) 0.0445(15) 0.0373(13) -0.0155(11) -0.0056(11) -0.0071(11) 
O7 0.0412(14) 0.0480(17) 0.0380(14) -0.0121(12) -0.0035(11) -0.0060(12) 
O8 0.0350(13) 0.0419(14) 0.0389(13) -0.0183(11) -0.0066(10) -0.0111(10) 
O9 0.0444(14) 0.0453(15) 0.0366(13) -0.0096(11) -0.0052(11) -0.0099(11) 
O10 0.0422(14) 0.0436(15) 0.0407(13) -0.0177(11) -0.0104(11) -0.0128(11) 
O11 0.0405(13) 0.0419(14) 0.0383(14) -0.0124(11) -0.0076(11) -0.0155(11) 
O12 0.0403(14) 0.0475(15) 0.0411(14) -0.0089(11) -0.0041(11) -0.0161(11) 
O13 0.0388(13) 0.0381(14) 0.0341(12) -0.0141(11) -0.0078(10) -0.0078(11) 
O14 0.0378(13) 0.0399(14) 0.0369(13) -0.0138(10) -0.0090(10) -0.0091(11) 
O15 0.0457(14) 0.0443(15) 0.0377(13) -0.0157(12) -0.0120(11) -0.0089(12) 
O16 0.0447(14) 0.0445(15) 0.0370(13) -0.0122(11) -0.0107(11) -0.0114(12) 
O17 0.081(2) 0.079(2) 0.066(2) -0.0123(17) -0.0123(18) -0.0060(18) 
O19 0.049(3) 0.068(4) 0.071(4) -0.015(3) -0.023(3) -0.005(3) 
O20 0.066(4) 0.089(5) 0.068(4) -0.010(4) -0.027(3) 0.000(4) 
O21 0.069(4) 0.054(4) 0.071(4) -0.007(3) -0.013(3) 0.005(3) 
O22 0.062(4) 0.048(3) 0.067(4) -0.007(3) -0.012(3) 0.008(3) 
O23 0.074(3) 0.086(3) 0.080(3) -0.011(3) -0.011(2) -0.003(3) 
N1 0.068(2) 0.068(3) 0.059(2) -0.0160(19) 0.0089(19) -0.005(2) 
N2 0.0451(18) 0.051(2) 0.0439(18) -0.0102(15) -0.0019(14) -0.0075(16) 
N3 0.055(2) 0.067(2) 0.050(2) -0.0045(17) -0.0015(16) -0.0071(18) 
N4 0.061(2) 0.059(2) 0.055(2) -0.0028(17) 0.0025(18) -0.0128(19) 
N5 0.0420(17) 0.0414(18) 0.0467(18) -0.0093(14) -0.0068(14) -0.0074(14) 
N6 0.060(2) 0.062(2) 0.060(2) -0.0187(18) -0.0066(17) -0.0125(18) 
N7 0.053(4) 0.062(5) 0.064(4) -0.010(4) -0.027(3) -0.002(4) 
N8 0.077(5) 0.053(5) 0.060(4) -0.007(4) -0.008(4) 0.002(4) 
Cl1 0.0505(6) 0.0597(6) 0.0473(5) 0.0089(5) -0.0006(4) -0.0067(5) 
Cl2 0.0487(6) 0.0587(6) 0.0525(6) 0.0035(5) 0.0014(4) -0.0101(5) 
Cl3 0.0527(6) 0.0587(6) 0.0486(5) 0.0062(5) -0.0062(4) -0.0088(5) 
Cl4 0.0523(6) 0.0580(6) 0.0494(6) 0.0009(5) -0.0004(4) -0.0120(5) 
Cl5 0.0737(8) 0.0662(8) 0.0713(7) -0.0128(6) 0.0052(6) -0.0073(6) 
Cl6 0.0788(8) 0.0733(8) 0.0691(7) -0.0087(6) 0.0025(6) -0.0009(6) 
Cl7 0.0474(5) 0.0591(6) 0.0491(5) -0.0040(5) 0.0015(4) -0.0067(5) 
Cl8 0.0465(5) 0.0598(6) 0.0551(6) -0.0025(5) -0.0031(4) -0.0088(5) 
Cl9 0.0651(7) 0.0776(8) 0.0617(7) -0.0082(6) -0.0031(5) -0.0001(6) 
Cl10 0.0606(6) 0.0681(7) 0.0574(6) -0.0087(5) -0.0015(5) -0.0070(5) 
Cl11 0.0734(7) 0.0634(7) 0.0650(7) -0.0083(5) -0.0022(6) -0.0128(6) 
Cl12 0.0726(7) 0.0657(7) 0.0659(7) -0.0043(6) -0.0057(6) -0.0089(6) 
Cl13 0.0423(5) 0.0517(6) 0.0503(5) -0.0047(4) -0.0050(4) -0.0052(4) 
Cl14 0.0438(5) 0.0542(6) 0.0510(5) -0.0044(4) -0.0082(4) -0.0094(4) 
Cl15 0.0792(8) 0.0749(8) 0.0606(7) -0.0124(6) -0.0070(6) -0.0026(6) 
Cl16 0.0668(7) 0.0680(7) 0.0687(7) -0.0136(6) -0.0093(6) -0.0049(6) 
Cl17 0.0633(13) 0.0693(15) 0.0670(14) -0.0115(11) -0.0231(11) -0.0056(11) 
Cl18 0.0630(14) 0.0761(16) 0.0711(14) -0.0140(12) -0.0310(11) -0.0054(11) 
Cl19 0.0717(14) 0.0598(14) 0.0614(13) -0.0046(11) -0.0020(11) -0.0108(11) 
Cl20 0.0738(15) 0.0478(12) 0.0692(14) -0.0045(10) -0.0192(11) 0.0119(11) 
C1 0.044(2) 0.045(2) 0.041(2) -0.0118(18) -0.0057(18) -0.0071(17) 
C2 0.051(2) 0.050(2) 0.049(2) -0.0085(19) -0.0049(18) -0.0001(19) 
C3 0.055(3) 0.055(3) 0.054(2) -0.009(2) 0.001(2) 0.007(2) 
C4 0.058(3) 0.059(3) 0.053(2) -0.010(2) 0.000(2) 0.004(2) 
C5 0.056(3) 0.063(3) 0.052(2) -0.010(2) 0.005(2) 0.002(2) 
C6 0.062(3) 0.061(3) 0.051(2) -0.011(2) 0.005(2) 0.004(2) 
C7 0.067(3) 0.059(3) 0.054(3) -0.015(2) 0.006(2) -0.001(2) 
C8 0.058(3) 0.058(3) 0.055(3) -0.013(2) 0.002(2) 0.001(2) 
C9 0.071(3) 0.062(3) 0.066(3) -0.017(2) 0.006(2) -0.007(2) 
C10 0.065(3) 0.070(3) 0.063(3) -0.011(2) 0.004(2) -0.009(2) 
C11 0.069(3) 0.069(3) 0.065(3) -0.011(2) 0.006(2) -0.008(3) 
C12 0.077(3) 0.067(3) 0.070(3) -0.015(2) 0.007(3) -0.006(3) 
C13 0.076(3) 0.064(3) 0.069(3) -0.014(2) 0.006(3) -0.006(3) 
C14 0.074(3) 0.073(3) 0.066(3) -0.010(3) 0.008(2) -0.009(3) 
C15 0.0377(19) 0.042(2) 0.0380(19) -0.0130(17) -0.0073(15) -0.0096(16) 
C16 0.0364(19) 0.046(2) 0.042(2) -0.0123(17) -0.0053(15) -0.0121(16) 
C17 0.0349(19) 0.047(2) 0.041(2) -0.0097(17) -0.0020(15) -0.0110(17) 
C18 0.038(2) 0.049(2) 0.042(2) -0.0090(17) -0.0014(16) -0.0128(17) 
C19 0.043(2) 0.050(2) 0.046(2) -0.0110(18) -0.0011(17) -0.0060(18) 
C20 0.048(2) 0.049(2) 0.040(2) -0.0116(17) -0.0043(17) -0.0101(18) 
C21 0.041(2) 0.048(2) 0.042(2) -0.0095(17) -0.0027(16) -0.0103(18) 
C22 0.041(2) 0.045(2) 0.042(2) -0.0079(17) -0.0006(16) -0.0079(17) 
C23 0.043(2) 0.051(2) 0.047(2) -0.0078(18) 0.0001(18) -0.0074(18) 
C24 0.047(2) 0.054(2) 0.045(2) -0.0073(19) -0.0026(18) -0.0062(19) 
C25 0.048(2) 0.054(3) 0.047(2) -0.0108(19) -0.0017(18) -0.0054(19) 
C26 0.049(2) 0.055(3) 0.045(2) -0.0016(19) -0.0043(18) -0.0043(19) 
C27 0.047(2) 0.054(3) 0.049(2) -0.0014(19) -0.0015(18) -0.0059(19) 
C28 0.044(2) 0.052(2) 0.049(2) -0.0041(19) -0.0023(18) -0.0071(18) 
C29 0.042(2) 0.051(3) 0.040(2) -0.0158(19) -0.0035(17) -0.0029(19) 
C30 0.046(2) 0.053(2) 0.043(2) -0.0122(18) -0.0015(17) -0.0050(18) 
C31 0.048(2) 0.056(3) 0.046(2) -0.0104(19) 0.0002(18) -0.0044(19) 
C32 0.050(2) 0.066(3) 0.048(2) -0.009(2) -0.0008(19) -0.005(2) 
C33 0.052(2) 0.066(3) 0.053(3) -0.008(2) 0.001(2) -0.011(2) 
C34 0.050(2) 0.068(3) 0.052(2) -0.009(2) 0.0035(19) -0.009(2) 
C35 0.057(3) 0.068(3) 0.047(2) -0.006(2) 0.0016(19) -0.009(2) 
C36 0.049(2) 0.061(3) 0.051(2) -0.006(2) -0.0013(19) -0.006(2) 
C37 0.057(3) 0.068(3) 0.050(2) -0.008(2) -0.002(2) -0.010(2) 
C38 0.055(3) 0.062(3) 0.056(3) -0.005(2) -0.002(2) -0.008(2) 
C39 0.060(3) 0.069(3) 0.055(3) -0.006(2) -0.006(2) -0.004(2) 
C40 0.065(3) 0.070(3) 0.051(3) -0.005(2) -0.009(2) -0.006(2) 
C41 0.067(3) 0.069(3) 0.054(3) -0.012(2) -0.004(2) -0.005(2) 
C42 0.065(3) 0.070(3) 0.053(3) -0.009(2) -0.005(2) -0.005(2) 
C43 0.044(2) 0.041(2) 0.0384(19) -0.0147(16) -0.0073(16) -0.0111(16) 
C44 0.044(2) 0.050(2) 0.040(2) -0.0095(17) -0.0104(16) -0.0076(18) 
C45 0.040(2) 0.044(2) 0.043(2) -0.0185(17) -0.0125(16) -0.0125(17) 
C46 0.040(2) 0.045(2) 0.041(2) -0.0099(17) -0.0064(17) -0.0112(17) 
C47 0.042(2) 0.052(2) 0.044(2) -0.0069(18) -0.0067(17) -0.0142(18) 
C48 0.045(2) 0.056(3) 0.048(2) -0.0062(19) -0.0023(18) -0.0179(19) 
C49 0.050(2) 0.055(3) 0.053(2) -0.002(2) -0.0028(19) -0.019(2) 
C50 0.049(2) 0.059(3) 0.055(2) -0.008(2) 0.0014(19) -0.017(2) 
C51 0.057(3) 0.061(3) 0.055(3) -0.004(2) -0.003(2) -0.017(2) 
C52 0.056(3) 0.053(3) 0.054(2) -0.005(2) -0.002(2) -0.016(2) 
C53 0.054(2) 0.054(3) 0.050(2) -0.004(2) -0.0027(19) -0.015(2) 
C54 0.065(3) 0.058(3) 0.058(3) -0.004(2) 0.002(2) -0.006(2) 
C55 0.069(3) 0.061(3) 0.062(3) -0.004(2) -0.004(2) -0.012(2) 
C56 0.070(3) 0.059(3) 0.064(3) -0.005(2) -0.003(2) -0.007(2) 
C57 0.062(3) 0.062(3) 0.064(3) -0.005(2) -0.006(2) -0.002(2) 
C58 0.066(3) 0.062(3) 0.060(3) -0.009(2) 0.000(2) -0.010(2) 
C59 0.067(3) 0.059(3) 0.057(3) -0.008(2) 0.001(2) -0.009(2) 
C60 0.0366(19) 0.044(2) 0.0336(18) -0.0120(16) -0.0071(15) -0.0082(16) 
C61 0.0393(19) 0.044(2) 0.0393(19) -0.0096(16) -0.0090(15) -0.0119(16) 
C62 0.0381(19) 0.042(2) 0.043(2) -0.0110(16) -0.0104(16) -0.0072(16) 
C63 0.0360(19) 0.045(2) 0.044(2) -0.0098(17) -0.0078(16) -0.0076(16) 
C64 0.039(2) 0.049(2) 0.044(2) -0.0121(17) -0.0079(16) -0.0060(17) 
C65 0.042(2) 0.041(2) 0.044(2) -0.0106(17) -0.0080(17) -0.0053(17) 
C66 0.043(2) 0.043(2) 0.042(2) -0.0089(17) -0.0093(16) -0.0087(17) 
C67 0.039(2) 0.041(2) 0.043(2) -0.0080(16) -0.0090(16) -0.0102(16) 
C68 0.042(2) 0.043(2) 0.046(2) -0.0085(17) -0.0049(17) -0.0063(17) 
C69 0.043(2) 0.046(2) 0.047(2) -0.0072(18) -0.0075(17) -0.0073(17) 
C70 0.046(2) 0.047(2) 0.046(2) -0.0025(18) -0.0045(17) -0.0110(18) 
C71 0.045(2) 0.050(2) 0.046(2) -0.0028(18) -0.0023(17) -0.0090(18) 
C72 0.043(2) 0.049(2) 0.048(2) -0.0063(18) -0.0026(17) -0.0084(18) 
C73 0.040(2) 0.047(2) 0.048(2) -0.0075(18) -0.0030(17) -0.0054(17) 
C74 0.043(2) 0.043(2) 0.037(2) -0.0164(18) -0.0122(16) -0.0025(18) 
C75 0.049(2) 0.052(2) 0.045(2) -0.0126(18) -0.0143(18) -0.0056(18) 
C76 0.051(2) 0.057(3) 0.048(2) -0.0135(19) -0.0155(19) -0.012(2) 
C77 0.052(2) 0.059(3) 0.050(2) -0.014(2) -0.0111(19) -0.011(2) 
C78 0.053(2) 0.061(3) 0.055(2) -0.016(2) -0.011(2) -0.013(2) 
C79 0.061(3) 0.058(3) 0.052(2) -0.017(2) -0.014(2) -0.014(2) 
C80 0.057(3) 0.057(3) 0.051(2) -0.017(2) -0.0103(19) -0.008(2) 
C81 0.052(2) 0.055(3) 0.052(2) -0.014(2) -0.0145(19) -0.009(2) 
C82 0.061(3) 0.060(3) 0.062(3) -0.014(2) -0.006(2) -0.011(2) 
C83 0.061(3) 0.065(3) 0.061(3) -0.015(2) -0.005(2) -0.009(2) 
C84 0.068(3) 0.068(3) 0.059(3) -0.016(2) -0.006(2) -0.010(2) 
C85 0.068(3) 0.068(3) 0.059(3) -0.018(2) -0.005(2) -0.003(2) 
C86 0.066(3) 0.066(3) 0.063(3) -0.017(2) -0.008(2) 0.001(2) 
C87 0.069(3) 0.068(3) 0.059(3) -0.014(2) -0.008(2) -0.010(2) 
C88 0.065(6) 0.055(6) 0.068(6) -0.010(5) -0.032(5) -0.005(5) 
C89 0.064(6) 0.062(6) 0.064(6) -0.017(4) -0.028(4) -0.011(4) 
C90 0.052(5) 0.056(6) 0.063(5) -0.013(4) -0.028(4) 0.010(4) 
C91 0.067(6) 0.065(6) 0.063(5) -0.023(5) -0.038(5) 0.003(5) 
C92 0.057(5) 0.070(6) 0.062(5) -0.023(5) -0.026(4) 0.013(5) 
C93 0.058(5) 0.071(6) 0.069(6) -0.014(5) -0.027(4) -0.016(5) 
C94 0.057(5) 0.063(6) 0.067(6) -0.017(5) -0.023(5) -0.001(4) 
C95 0.049(5) 0.069(6) 0.068(6) -0.009(5) -0.025(4) -0.012(4) 
C96 0.050(5) 0.056(5) 0.071(6) -0.014(5) -0.024(4) -0.004(4) 
C97 0.050(5) 0.070(6) 0.078(6) -0.019(5) -0.031(4) -0.003(4) 
C98 0.055(5) 0.079(7) 0.065(6) -0.022(5) -0.024(4) -0.005(5) 
C99 0.047(5) 0.076(6) 0.073(6) -0.019(5) -0.023(4) -0.001(4) 
C100 0.056(5) 0.063(6) 0.080(6) -0.011(5) -0.032(5) -0.009(4) 
C101 0.052(5) 0.058(6) 0.081(6) -0.015(5) -0.028(5) -0.004(4) 
C102 0.079(7) 0.055(6) 0.053(5) -0.005(4) -0.015(5) -0.002(5) 
C103 0.074(6) 0.048(5) 0.066(6) -0.002(4) -0.017(5) 0.003(4) 
C104 0.073(6) 0.048(5) 0.064(6) -0.009(4) -0.014(5) 0.005(4) 
C105 0.072(6) 0.054(6) 0.076(6) -0.012(5) -0.002(5) -0.008(5) 
C106 0.058(5) 0.048(5) 0.076(6) -0.004(4) -0.010(5) 0.007(4) 
C107 0.068(6) 0.054(6) 0.066(6) 0.000(4) -0.010(5) -0.001(5) 
C108 0.068(6) 0.058(6) 0.066(6) -0.012(4) -0.013(5) 0.001(5) 
C109 0.060(6) 0.052(5) 0.070(6) -0.003(4) -0.008(4) -0.008(4) 
C110 0.073(6) 0.057(6) 0.067(6) -0.010(5) -0.019(5) 0.004(5) 
C111 0.069(6) 0.053(6) 0.068(6) 0.001(4) -0.011(5) -0.004(5) 
C112 0.067(6) 0.046(5) 0.068(6) -0.002(4) -0.011(5) -0.002(4) 
C113 0.065(6) 0.055(5) 0.065(6) -0.009(5) -0.013(5) -0.002(4) 
C114 0.061(6) 0.054(6) 0.070(6) -0.010(5) -0.010(5) 0.010(4) 
C115 0.065(6) 0.052(5) 0.073(6) -0.011(5) -0.019(5) 0.004(4) 
C116 0.088(4) 0.088(4) 0.069(3) -0.014(3) -0.011(3) -0.006(3) 

_refine_ls_extinction_method 
    'None'
_oxford_refine_ls_scale 0.079337(7) 
loop_
 _geom_bond_atom_site_label_1
 _geom_bond_site_symmetry_1
 _geom_bond_atom_site_label_2
 _geom_bond_site_symmetry_2
 _geom_bond_distance
 _geom_bond_publ_flag
Fe1 . O1 . 1.863(2)    yes
Fe1 . O2 . 2.019(2)    yes
Fe1 . O4 . 2.013(2)    yes
Fe1 . O8 . 2.057(2)    yes
Fe1 . O11 . 2.002(2)    yes
Fe1 . O13 . 2.051(2)    yes
Fe2 . O1 . 1.926(2)    yes
Fe2 . O3 . 2.060(2)    yes
Fe2 . O7 . 2.050(3)    yes
Fe2 . O9 . 2.078(2)    yes
Fe2 . O12 . 2.026(2)    yes
Fe2 . O16 . 2.041(2)    yes
Fe3 . O1 . 1.905(2)    yes
Fe3 . O5 . 2.024(2)    yes
Fe3 . O6 . 2.037(2)    yes
Fe3 . O10 . 2.064(2)    yes
Fe3 . O14 . 2.029(2)    yes
Fe3 . O15 . 2.042(2)    yes
Fe4 . Cl1 . 2.1748(11)    yes
Fe4 . Cl2 . 2.1483(12)    yes
Fe4 . Cl3 . 2.1722(11)    yes
Fe4 . Cl4 . 2.1857(12)    yes
O2 . C1 . 1.160(4)    yes
O3 . C1 . 1.200(4)    yes
O4 . C15 . 1.266(4)    yes
O5 . C15 . 1.152(4)    yes
O6 . C29 . 1.286(4)    yes
O7 . C29 . 1.125(4)    yes
O8 . C43 . 1.425(4)    yes
O8 . H81 . 0.935    no
O9 . C44 . 1.442(4)    yes
O9 . H91 . 0.851    no
O10 . C45 . 1.421(4)    yes
O10 . H101 . 0.821    no
O11 . C46 . 1.211(4)    yes
O12 . C46 . 1.190(4)    yes
O13 . C60 . 1.132(4)    yes
O14 . C60 . 1.335(4)    yes
O15 . C74 . 1.225(4)    yes
O16 . C74 . 1.163(4)    yes
O17 . C116 . 1.414(5)    yes
O17 . H171 . 0.727    no
O18 . C117 . 1.433(11)    yes
O18 . H1190 . 0.854    no
O19 . C88 . 1.226(10)    yes
O20 . C88 . 1.305(10)    yes
O20 . H1189 . 0.819    no
O21 . C102 . 1.245(10)    yes
O22 . C102 . 1.287(10)    yes
O22 . H221 . 0.919    no
O23 . H234 2_666 0.820    no
O23 . H232 2_666 0.820    no
O23 . H232 . 0.820    no
O23 . H234 . 0.820    no
O24 . H243 . 0.830    no
O24 . H244 . 0.830    no
N1 . C8 . 1.396(5)    yes
N1 . C9 . 1.361(5)    yes
N1 . H11 . 0.830    no
N2 . C22 . 1.361(5)    yes
N2 . C23 . 1.363(5)    yes
N2 . H1188 . 0.852    no
N3 . C36 . 1.399(5)    yes
N3 . C37 . 1.436(5)    yes
N3 . H31 . 0.830    no
N4 . C53 . 1.410(5)    yes
N4 . C54 . 1.344(5)    yes
N4 . H1185 . 0.859    no
N5 . C67 . 1.415(4)    yes
N5 . C68 . 1.385(4)    yes
N5 . H1186 . 0.855    no
N6 . C81 . 1.415(5)    yes
N6 . C82 . 1.407(5)    yes
N6 . H1187 . 0.830    no
N7 . C95 . 1.395(11)    yes
N7 . C96 . 1.420(10)    yes
N7 . H71 . 0.867    no
N8 . C109 . 1.429(11)    yes
N8 . C110 . 1.426(11)    yes
N8 . H1184 . 0.869    no
Cl5 . C10 . 1.696(5)    yes
Cl6 . C14 . 1.686(5)    yes
Cl7 . C24 . 1.695(4)    yes
Cl8 . C28 . 1.732(4)    yes
Cl9 . C42 . 1.601(5)    yes
Cl10 . C38 . 1.704(4)    yes
Cl11 . C59 . 1.690(4)    yes
Cl12 . C55 . 1.695(5)    yes
Cl13 . C73 . 1.701(4)    yes
Cl14 . C69 . 1.705(4)    yes
Cl15 . C87 . 1.694(5)    yes
Cl16 . C83 . 1.692(5)    yes
Cl17 . C101 . 1.667(9)    yes
Cl18 . C97 . 1.688(9)    yes
Cl19 . C111 . 1.717(9)    yes
Cl20 . C115 . 1.683(10)    yes
C1 . C2 . 1.500(5)    yes
C2 . C3 . 1.504(5)    yes
C2 . H21 . 0.967    no
C2 . H22 . 0.966    no
C3 . C4 . 1.393(6)    yes
C3 . C8 . 1.395(6)    yes
C4 . C5 . 1.395(5)    yes
C4 . H41 . 0.927    no
C5 . C6 . 1.385(6)    yes
C5 . H51 . 0.924    no
C6 . C7 . 1.393(6)    yes
C6 . H61 . 0.928    no
C7 . C8 . 1.392(5)    yes
C7 . H1183 . 0.931    no
C9 . C10 . 1.407(6)    yes
C9 . C14 . 1.398(6)    yes
C10 . C11 . 1.400(6)    yes
C11 . C12 . 1.393(6)    yes
C11 . H111 . 0.931    no
C12 . C13 . 1.394(7)    yes
C12 . H121 . 0.932    no
C13 . C14 . 1.394(6)    yes
C13 . H131 . 0.924    no
C15 . C16 . 1.510(5)    yes
C16 . C17 . 1.505(5)    yes
C16 . H161 . 0.956    no
C16 . H162 . 0.963    no
C17 . C18 . 1.392(5)    yes
C17 . C22 . 1.386(5)    yes
C18 . C19 . 1.397(5)    yes
C18 . H181 . 0.928    no
C19 . C20 . 1.391(5)    yes
C19 . H191 . 0.925    no
C20 . C21 . 1.388(5)    yes
C20 . H201 . 0.929    no
C21 . C22 . 1.397(5)    yes
C21 . H211 . 0.920    no
C23 . C24 . 1.391(5)    yes
C23 . C28 . 1.384(5)    yes
C24 . C25 . 1.392(5)    yes
C25 . C26 . 1.393(5)    yes
C25 . H251 . 0.922    no
C26 . C27 . 1.379(5)    yes
C26 . H261 . 0.926    no
C27 . C28 . 1.391(5)    yes
C27 . H271 . 0.927    no
C29 . C30 . 1.518(5)    yes
C30 . C31 . 1.503(5)    yes
C30 . H301 . 0.961    no
C30 . H302 . 0.965    no
C31 . C32 . 1.387(5)    yes
C31 . C36 . 1.384(5)    yes
C32 . C33 . 1.390(5)    yes
C32 . H321 . 0.931    no
C33 . C34 . 1.396(6)    yes
C33 . H331 . 0.932    no
C34 . C35 . 1.386(5)    yes
C34 . H341 . 0.929    no
C35 . C36 . 1.403(5)    yes
C35 . H351 . 0.932    no
C37 . C38 . 1.382(6)    yes
C37 . C42 . 1.400(6)    yes
C38 . C39 . 1.392(6)    yes
C39 . C40 . 1.389(6)    yes
C39 . H391 . 0.928    no
C40 . C41 . 1.385(6)    yes
C40 . H401 . 0.926    no
C41 . C42 . 1.397(6)    yes
C41 . H411 . 0.930    no
C43 . H431 . 0.950    no
C43 . H432 . 0.950    no
C43 . H433 . 0.950    no
C44 . H441 . 0.957    no
C44 . H442 . 0.898    no
C44 . H443 . 0.958    no
C45 . H451 . 0.950    no
C45 . H452 . 0.950    no
C45 . H453 . 0.950    no
C46 . C47 . 1.510(5)    yes
C47 . C48 . 1.497(5)    yes
C47 . H471 . 0.964    no
C47 . H472 . 0.962    no
C48 . C49 . 1.390(5)    yes
C48 . C53 . 1.394(6)    yes
C49 . C50 . 1.393(5)    yes
C49 . H491 . 0.924    no
C50 . C51 . 1.390(6)    yes
C50 . H501 . 0.928    no
C51 . C52 . 1.383(6)    yes
C51 . H511 . 0.892    no
C52 . C53 . 1.391(5)    yes
C52 . H521 . 0.924    no
C54 . C55 . 1.399(6)    yes
C54 . C59 . 1.399(6)    yes
C55 . C56 . 1.399(6)    yes
C56 . C57 . 1.390(6)    yes
C56 . H561 . 0.932    no
C57 . C58 . 1.389(6)    yes
C57 . H571 . 0.925    no
C58 . C59 . 1.376(6)    yes
C58 . H581 . 0.932    no
C60 . C61 . 1.497(5)    yes
C61 . C62 . 1.503(5)    yes
C61 . H611 . 0.960    no
C61 . H612 . 0.962    no
C62 . C63 . 1.395(5)    yes
C62 . C67 . 1.401(5)    yes
C63 . C64 . 1.391(5)    yes
C63 . H631 . 0.926    no
C64 . C65 . 1.390(5)    yes
C64 . H641 . 0.927    no
C65 . C66 . 1.387(5)    yes
C65 . H651 . 0.928    no
C66 . C67 . 1.397(5)    yes
C66 . H661 . 0.929    no
C68 . C69 . 1.388(5)    yes
C68 . C73 . 1.383(5)    yes
C69 . C70 . 1.384(5)    yes
C70 . C71 . 1.384(5)    yes
C70 . H701 . 0.922    no
C71 . C72 . 1.385(5)    yes
C71 . H711 . 0.916    no
C72 . C73 . 1.393(5)    yes
C72 . H721 . 0.923    no
C74 . C75 . 1.516(5)    yes
C75 . C76 . 1.507(5)    yes
C75 . H751 . 0.957    no
C75 . H752 . 0.969    no
C76 . C77 . 1.386(5)    yes
C76 . C81 . 1.394(5)    yes
C77 . C78 . 1.393(5)    yes
C77 . H771 . 0.924    no
C78 . C79 . 1.386(5)    yes
C78 . H781 . 0.930    no
C79 . C80 . 1.385(5)    yes
C79 . H791 . 0.920    no
C80 . C81 . 1.402(5)    yes
C80 . H801 . 0.928    no
C82 . C83 . 1.391(6)    yes
C82 . C87 . 1.396(6)    yes
C83 . C84 . 1.388(6)    yes
C84 . C85 . 1.392(6)    yes
C84 . H841 . 0.929    no
C85 . C86 . 1.389(6)    yes
C85 . H851 . 0.930    no
C86 . C87 . 1.392(6)    yes
C86 . H861 . 0.927    no
C88 . C89 . 1.514(12)    yes
C89 . C90 . 1.471(12)    yes
C89 . H891 . 0.966    no
C89 . H892 . 0.965    no
C90 . C91 . 1.396(12)    yes
C90 . C95 . 1.409(12)    yes
C91 . C92 . 1.397(12)    yes
C91 . H911 . 0.929    no
C92 . C93 . 1.375(12)    yes
C92 . H921 . 0.929    no
C93 . C94 . 1.413(12)    yes
C93 . H931 . 0.928    no
C94 . C95 . 1.403(12)    yes
C94 . H941 . 0.930    no
C96 . C97 . 1.402(12)    yes
C96 . C101 . 1.411(12)    yes
C97 . C98 . 1.400(12)    yes
C98 . C99 . 1.391(12)    yes
C98 . H981 . 0.929    no
C99 . C100 . 1.391(12)    yes
C99 . H991 . 0.925    no
C100 . C101 . 1.395(12)    yes
C100 . H1001 . 0.925    no
C102 . C103 . 1.479(12)    yes
C103 . C104 . 1.518(12)    yes
C103 . H1031 . 0.969    no
C103 . H1032 . 0.969    no
C104 . C105 . 1.400(12)    yes
C104 . C109 . 1.397(11)    yes
C105 . C106 . 1.396(12)    yes
C105 . H1051 . 0.930    no
C106 . C107 . 1.372(11)    yes
C106 . H1061 . 0.928    no
C107 . C108 . 1.401(12)    yes
C107 . H1071 . 0.928    no
C108 . C109 . 1.399(12)    yes
C108 . H1081 . 0.931    no
C110 . C111 . 1.409(12)    yes
C110 . C115 . 1.400(12)    yes
C111 . C112 . 1.376(11)    yes
C112 . C113 . 1.387(12)    yes
C112 . H1121 . 0.927    no
C113 . C114 . 1.387(12)    yes
C113 . H1131 . 0.928    no
C114 . C115 . 1.389(12)    yes
C114 . H1141 . 0.929    no
C116 . H1161 . 0.950    no
C116 . H1162 . 0.950    no
C116 . H1163 . 0.950    no
C117 . H1171 . 0.963    no
C117 . H1172 . 0.973    no
C117 . H1173 . 0.983    no
loop_
 _geom_angle_atom_site_label_1
 _geom_angle_site_symmetry_1
 _geom_angle_atom_site_label_2
 _geom_angle_site_symmetry_2
 _geom_angle_atom_site_label_3
 _geom_angle_site_symmetry_3
 _geom_angle
 _geom_angle_publ_flag
O1 . Fe1 . O2 . 93.31(10)    yes
O1 . Fe1 . O4 . 94.99(9)    yes
O2 . Fe1 . O4 . 91.69(9)    yes
O1 . Fe1 . O8 . 177.10(9)    yes
O2 . Fe1 . O8 . 86.04(9)    yes
O4 . Fe1 . O8 . 82.21(8)    yes
O1 . Fe1 . O11 . 97.53(9)    yes
O2 . Fe1 . O11 . 89.47(10)    yes
O4 . Fe1 . O11 . 167.34(9)    yes
O8 . Fe1 . O11 . 85.29(9)    yes
O1 . Fe1 . O13 . 91.03(9)    yes
O2 . Fe1 . O13 . 173.90(9)    yes
O4 . Fe1 . O13 . 92.20(9)    yes
O8 . Fe1 . O13 . 89.84(9)    yes
O11 . Fe1 . O13 . 85.71(9)    yes
O1 . Fe2 . O3 . 92.29(10)    yes
O1 . Fe2 . O7 . 93.19(10)    yes
O3 . Fe2 . O7 . 173.37(10)    yes
O1 . Fe2 . O9 . 179.15(9)    yes
O3 . Fe2 . O9 . 87.49(10)    yes
O7 . Fe2 . O9 . 87.08(10)    yes
O1 . Fe2 . O12 . 93.49(9)    yes
O3 . Fe2 . O12 . 93.43(10)    yes
O7 . Fe2 . O12 . 89.96(9)    yes
O9 . Fe2 . O12 . 85.70(9)    yes
O1 . Fe2 . O16 . 94.74(9)    yes
O3 . Fe2 . O16 . 86.97(9)    yes
O7 . Fe2 . O16 . 88.86(9)    yes
O9 . Fe2 . O16 . 86.07(9)    yes
O12 . Fe2 . O16 . 171.74(10)    yes
O1 . Fe3 . O5 . 94.93(9)    yes
O1 . Fe3 . O6 . 93.69(9)    yes
O5 . Fe3 . O6 . 171.38(9)    yes
O1 . Fe3 . O10 . 176.72(10)    yes
O5 . Fe3 . O10 . 88.34(9)    yes
O6 . Fe3 . O10 . 83.04(9)    yes
O1 . Fe3 . O14 . 92.94(9)    yes
O5 . Fe3 . O14 . 92.88(9)    yes
O6 . Fe3 . O14 . 86.82(9)    yes
O10 . Fe3 . O14 . 86.55(9)    yes
O1 . Fe3 . O15 . 94.73(10)    yes
O5 . Fe3 . O15 . 86.51(9)    yes
O6 . Fe3 . O15 . 92.64(9)    yes
O10 . Fe3 . O15 . 85.79(9)    yes
O14 . Fe3 . O15 . 172.32(9)    yes
Cl1 . Fe4 . Cl2 . 109.79(5)    yes
Cl1 . Fe4 . Cl3 . 107.38(4)    yes
Cl2 . Fe4 . Cl3 . 111.61(5)    yes
Cl1 . Fe4 . Cl4 . 113.78(5)    yes
Cl2 . Fe4 . Cl4 . 108.04(4)    yes
Cl3 . Fe4 . Cl4 . 106.25(5)    yes
Fe2 . O1 . Fe3 . 119.54(11)    yes
Fe2 . O1 . Fe1 . 119.04(11)    yes
Fe3 . O1 . Fe1 . 121.40(12)    yes
Fe1 . O2 . C1 . 135.7(3)    yes
Fe2 . O3 . C1 . 134.0(3)    yes
Fe1 . O4 . C15 . 132.5(2)    yes
Fe3 . O5 . C15 . 127.9(2)    yes
Fe3 . O6 . C29 . 130.5(2)    yes
Fe2 . O7 . C29 . 136.2(3)    yes
Fe1 . O8 . C43 . 131.68(19)    yes
Fe1 . O8 . H81 . 115.6    no
C43 . O8 . H81 . 112.2    no
Fe2 . O9 . C44 . 126.1(2)    yes
Fe2 . O9 . H91 . 113.9    no
C44 . O9 . H91 . 114.1    no
Fe3 . O10 . C45 . 128.51(18)    yes
Fe3 . O10 . H101 . 92.6    no
C45 . O10 . H101 . 107.9    no
Fe1 . O11 . C46 . 133.0(2)    yes
Fe2 . O12 . C46 . 134.2(2)    yes
Fe1 . O13 . C60 . 132.9(2)    yes
Fe3 . O14 . C60 . 129.1(2)    yes
Fe3 . O15 . C74 . 134.1(2)    yes
Fe2 . O16 . C74 . 135.0(2)    yes
C116 . O17 . H171 . 116.0    no
C117 . O18 . H1190 . 104.8    no
C88 . O20 . H1189 . 151.0    no
C102 . O22 . H221 . 114.7    no
H234 2_666 O23 . H232 2_666 109.4    no
H234 2_666 O23 . H232 . 70.6    no
H232 2_666 O23 . H232 . 180.0    no
H234 2_666 O23 . H234 . 180.0    no
H232 2_666 O23 . H234 . 70.6    no
H232 . O23 . H234 . 109.4    no
H243 . O24 . H244 . 109.5    no
C8 . N1 . C9 . 124.5(4)    yes
C8 . N1 . H11 . 117.4    no
C9 . N1 . H11 . 117.8    no
C22 . N2 . C23 . 124.3(3)    yes
C22 . N2 . H1188 . 119.5    no
C23 . N2 . H1188 . 116.1    no
C36 . N3 . C37 . 120.8(3)    yes
C36 . N3 . H31 . 119.7    no
C37 . N3 . H31 . 119.5    no
C53 . N4 . C54 . 127.8(4)    yes
C53 . N4 . H1185 . 113.0    no
C54 . N4 . H1185 . 117.1    no
C67 . N5 . C68 . 124.5(3)    yes
C67 . N5 . H1186 . 112.7    no
C68 . N5 . H1186 . 113.4    no
C81 . N6 . C82 . 117.8(3)    yes
C81 . N6 . H1187 . 121.0    no
C82 . N6 . H1187 . 120.7    no
C95 . N7 . C96 . 124.7(8)    yes
C95 . N7 . H71 . 118.6    no
C96 . N7 . H71 . 115.6    no
C109 . N8 . C110 . 130.1(8)    yes
C109 . N8 . H1184 . 110.4    no
C110 . N8 . H1184 . 118.7    no
O3 . C1 . O2 . 123.4(4)    yes
O3 . C1 . C2 . 113.7(3)    yes
O2 . C1 . C2 . 122.8(3)    yes
C1 . C2 . C3 . 114.2(3)    yes
C1 . C2 . H21 . 109.5    no
C3 . C2 . H21 . 105.8    no
C1 . C2 . H22 . 107.6    no
C3 . C2 . H22 . 110.4    no
H21 . C2 . H22 . 109.4    no
C2 . C3 . C4 . 118.2(4)    yes
C2 . C3 . C8 . 120.6(4)    yes
C4 . C3 . C8 . 121.2(4)    yes
C3 . C4 . C5 . 117.8(4)    yes
C3 . C4 . H41 . 121.1    no
C5 . C4 . H41 . 121.1    no
C4 . C5 . C6 . 122.3(4)    yes
C4 . C5 . H51 . 119.0    no
C6 . C5 . H51 . 118.6    no
C5 . C6 . C7 . 118.6(4)    yes
C5 . C6 . H61 . 122.3    no
C7 . C6 . H61 . 119.1    no
C6 . C7 . C8 . 120.7(4)    yes
C6 . C7 . H1183 . 120.1    no
C8 . C7 . H1183 . 119.1    no
N1 . C8 . C3 . 121.7(4)    yes
N1 . C8 . C7 . 119.0(4)    yes
C3 . C8 . C7 . 119.3(4)    yes
N1 . C9 . C10 . 122.0(4)    yes
N1 . C9 . C14 . 120.7(5)    yes
C10 . C9 . C14 . 117.3(4)    yes
C9 . C10 . Cl5 . 120.1(4)    yes
C9 . C10 . C11 . 119.9(5)    yes
Cl5 . C10 . C11 . 119.9(4)    yes
C10 . C11 . C12 . 121.5(5)    yes
C10 . C11 . H111 . 118.8    no
C12 . C11 . H111 . 119.6    no
C11 . C12 . C13 . 119.3(5)    yes
C11 . C12 . H121 . 120.2    no
C13 . C12 . H121 . 120.5    no
C12 . C13 . C14 . 118.7(5)    yes
C12 . C13 . H131 . 121.1    no
C14 . C13 . H131 . 120.2    no
C9 . C14 . C13 . 123.2(5)    yes
C9 . C14 . Cl6 . 116.7(4)    yes
C13 . C14 . Cl6 . 120.0(4)    yes
O4 . C15 . O5 . 129.1(3)    yes
O4 . C15 . C16 . 111.6(3)    yes
O5 . C15 . C16 . 119.3(3)    yes
C15 . C16 . C17 . 121.1(3)    yes
C15 . C16 . H161 . 103.0    no
C17 . C16 . H161 . 103.5    no
C15 . C16 . H162 . 106.8    no
C17 . C16 . H162 . 111.9    no
H161 . C16 . H162 . 109.9    no
C16 . C17 . C18 . 119.1(3)    yes
C16 . C17 . C22 . 119.2(3)    yes
C18 . C17 . C22 . 121.7(3)    yes
C17 . C18 . C19 . 121.3(3)    yes
C17 . C18 . H181 . 120.7    no
C19 . C18 . H181 . 118.0    no
C18 . C19 . C20 . 116.3(4)    yes
C18 . C19 . H191 . 122.0    no
C20 . C19 . H191 . 121.7    no
C19 . C20 . C21 . 123.0(3)    yes
C19 . C20 . H201 . 116.2    no
C21 . C20 . H201 . 120.7    no
C20 . C21 . C22 . 120.0(3)    yes
C20 . C21 . H211 . 121.1    no
C22 . C21 . H211 . 118.8    no
C21 . C22 . C17 . 117.7(4)    yes
C21 . C22 . N2 . 120.8(3)    yes
C17 . C22 . N2 . 121.4(3)    yes
N2 . C23 . C24 . 120.7(3)    yes
N2 . C23 . C28 . 125.0(3)    yes
C24 . C23 . C28 . 114.3(4)    yes
C23 . C24 . Cl7 . 120.1(3)    yes
C23 . C24 . C25 . 121.8(4)    yes
Cl7 . C24 . C25 . 118.1(3)    yes
C24 . C25 . C26 . 121.1(4)    yes
C24 . C25 . H251 . 119.2    no
C26 . C25 . H251 . 119.7    no
C25 . C26 . C27 . 119.2(4)    yes
C25 . C26 . H261 . 120.3    no
C27 . C26 . H261 . 120.5    no
C26 . C27 . C28 . 117.2(4)    yes
C26 . C27 . H271 . 120.8    no
C28 . C27 . H271 . 121.9    no
Cl8 . C28 . C27 . 116.8(3)    yes
Cl8 . C28 . C23 . 116.9(3)    yes
C27 . C28 . C23 . 126.4(4)    yes
O6 . C29 . O7 . 125.4(4)    yes
O6 . C29 . C30 . 107.2(3)    yes
O7 . C29 . C30 . 127.4(4)    yes
C29 . C30 . C31 . 110.8(3)    yes
C29 . C30 . H301 . 110.0    no
C31 . C30 . H301 . 108.7    no
C29 . C30 . H302 . 109.3    no
C31 . C30 . H302 . 108.8    no
H301 . C30 . H302 . 109.2    no
C30 . C31 . C32 . 121.9(4)    yes
C30 . C31 . C36 . 121.3(4)    yes
C32 . C31 . C36 . 116.8(4)    yes
C31 . C32 . C33 . 121.5(4)    yes
C31 . C32 . H321 . 120.4    no
C33 . C32 . H321 . 118.1    no
C32 . C33 . C34 . 120.8(4)    yes
C32 . C33 . H331 . 121.0    no
C34 . C33 . H331 . 118.2    no
C33 . C34 . C35 . 118.8(4)    yes
C33 . C34 . H341 . 121.9    no
C35 . C34 . H341 . 119.3    no
C34 . C35 . C36 . 119.0(4)    yes
C34 . C35 . H351 . 122.1    no
C36 . C35 . H351 . 118.9    no
C35 . C36 . N3 . 120.0(4)    yes
C35 . C36 . C31 . 123.1(4)    yes
N3 . C36 . C31 . 116.6(4)    yes
N3 . C37 . C38 . 117.4(4)    yes
N3 . C37 . C42 . 118.8(4)    yes
C38 . C37 . C42 . 123.8(4)    yes
Cl10 . C38 . C37 . 123.9(3)    yes
Cl10 . C38 . C39 . 116.7(4)    yes
C37 . C38 . C39 . 119.3(4)    yes
C38 . C39 . C40 . 118.7(4)    yes
C38 . C39 . H391 . 120.3    no
C40 . C39 . H391 . 121.0    no
C39 . C40 . C41 . 120.8(4)    yes
C39 . C40 . H401 . 119.5    no
C41 . C40 . H401 . 119.7    no
C40 . C41 . C42 . 122.2(4)    yes
C40 . C41 . H411 . 119.2    no
C42 . C41 . H411 . 118.6    no
C37 . C42 . C41 . 115.3(4)    yes
C37 . C42 . Cl9 . 124.7(4)    yes
C41 . C42 . Cl9 . 120.0(4)    yes
O8 . C43 . H431 . 107.4    no
O8 . C43 . H432 . 110.4    no
H431 . C43 . H432 . 109.5    no
O8 . C43 . H433 . 110.6    no
H431 . C43 . H433 . 109.5    no
H432 . C43 . H433 . 109.5    no
O9 . C44 . H441 . 108.7    no
O9 . C44 . H442 . 99.4    no
H441 . C44 . H442 . 105.2    no
O9 . C44 . H443 . 114.5    no
H441 . C44 . H443 . 109.1    no
H442 . C44 . H443 . 119.1    no
O10 . C45 . H451 . 109.3    no
O10 . C45 . H452 . 109.6    no
H451 . C45 . H452 . 109.5    no
O10 . C45 . H453 . 109.5    no
H451 . C45 . H453 . 109.5    no
H452 . C45 . H453 . 109.5    no
O11 . C46 . O12 . 124.5(3)    yes
O11 . C46 . C47 . 117.9(3)    yes
O12 . C46 . C47 . 117.6(3)    yes
C46 . C47 . C48 . 115.5(3)    yes
C46 . C47 . H471 . 107.1    no
C48 . C47 . H471 . 108.0    no
C46 . C47 . H472 . 109.0    no
C48 . C47 . H472 . 107.8    no
H471 . C47 . H472 . 109.5    no
C47 . C48 . C49 . 119.8(4)    yes
C47 . C48 . C53 . 119.7(4)    yes
C49 . C48 . C53 . 120.4(4)    yes
C48 . C49 . C50 . 115.3(4)    yes
C48 . C49 . H491 . 121.0    no
C50 . C49 . H491 . 123.7    no
C49 . C50 . C51 . 127.5(4)    yes
C49 . C50 . H501 . 115.3    no
C51 . C50 . H501 . 117.2    no
C50 . C51 . C52 . 114.0(4)    yes
C50 . C51 . H511 . 123.2    no
C52 . C51 . H511 . 122.8    no
C51 . C52 . C53 . 122.2(4)    yes
C51 . C52 . H521 . 117.2    no
C53 . C52 . H521 . 120.5    no
N4 . C53 . C48 . 122.1(4)    yes
N4 . C53 . C52 . 117.4(4)    yes
C48 . C53 . C52 . 120.6(4)    yes
N4 . C54 . C55 . 118.9(4)    yes
N4 . C54 . C59 . 125.9(4)    yes
C55 . C54 . C59 . 115.2(4)    yes
C54 . C55 . Cl12 . 121.1(4)    yes
C54 . C55 . C56 . 121.2(4)    yes
Cl12 . C55 . C56 . 117.7(4)    yes
C55 . C56 . C57 . 121.7(4)    yes
C55 . C56 . H561 . 119.4    no
C57 . C56 . H561 . 118.9    no
C56 . C57 . C58 . 117.8(5)    yes
C56 . C57 . H571 . 121.2    no
C58 . C57 . H571 . 121.0    no
C57 . C58 . C59 . 119.8(4)    yes
C57 . C58 . H581 . 120.4    no
C59 . C58 . H581 . 119.7    no
C54 . C59 . Cl11 . 114.1(4)    yes
C54 . C59 . C58 . 124.3(4)    yes
Cl11 . C59 . C58 . 121.5(4)    yes
O14 . C60 . O13 . 123.5(3)    yes
O14 . C60 . C61 . 111.2(3)    yes
O13 . C60 . C61 . 124.9(3)    yes
C60 . C61 . C62 . 123.0(3)    yes
C60 . C61 . H611 . 106.2    no
C62 . C61 . H611 . 104.8    no
C60 . C61 . H612 . 106.9    no
C62 . C61 . H612 . 106.6    no
H611 . C61 . H612 . 108.8    no
C61 . C62 . C63 . 120.6(3)    yes
C61 . C62 . C67 . 120.5(3)    yes
C63 . C62 . C67 . 118.7(3)    yes
C62 . C63 . C64 . 120.2(3)    yes
C62 . C63 . H631 . 119.2    no
C64 . C63 . H631 . 120.7    no
C63 . C64 . C65 . 121.5(3)    yes
C63 . C64 . H641 . 118.2    no
C65 . C64 . H641 . 120.3    no
C64 . C65 . C66 . 118.4(3)    yes
C64 . C65 . H651 . 120.9    no
C66 . C65 . H651 . 120.8    no
C65 . C66 . C67 . 121.0(3)    yes
C65 . C66 . H661 . 119.3    no
C67 . C66 . H661 . 119.7    no
N5 . C67 . C62 . 118.6(3)    yes
N5 . C67 . C66 . 121.1(3)    yes
C62 . C67 . C66 . 120.3(3)    yes
N5 . C68 . C69 . 123.8(3)    yes
N5 . C68 . C73 . 117.3(3)    yes
C69 . C68 . C73 . 118.8(3)    yes
Cl14 . C69 . C68 . 118.7(3)    yes
Cl14 . C69 . C70 . 119.6(3)    yes
C68 . C69 . C70 . 121.4(3)    yes
C69 . C70 . C71 . 119.1(4)    yes
C69 . C70 . H701 . 119.7    no
C71 . C70 . H701 . 121.2    no
C70 . C71 . C72 . 120.5(4)    yes
C70 . C71 . H711 . 119.9    no
C72 . C71 . H711 . 119.6    no
C71 . C72 . C73 . 119.6(4)    yes
C71 . C72 . H721 . 119.3    no
C73 . C72 . H721 . 121.1    no
C72 . C73 . Cl13 . 117.2(3)    yes
C72 . C73 . C68 . 120.6(4)    yes
Cl13 . C73 . C68 . 122.1(3)    yes
O15 . C74 . O16 . 124.4(3)    yes
O15 . C74 . C75 . 119.9(3)    yes
O16 . C74 . C75 . 115.7(3)    yes
C74 . C75 . C76 . 115.3(3)    yes
C74 . C75 . H751 . 109.9    no
C76 . C75 . H751 . 108.5    no
C74 . C75 . H752 . 105.5    no
C76 . C75 . H752 . 107.7    no
H751 . C75 . H752 . 109.8    no
C75 . C76 . C77 . 121.4(4)    yes
C75 . C76 . C81 . 119.9(4)    yes
C77 . C76 . C81 . 118.7(4)    yes
C76 . C77 . C78 . 120.5(4)    yes
C76 . C77 . H771 . 120.0    no
C78 . C77 . H771 . 119.5    no
C77 . C78 . C79 . 121.4(4)    yes
C77 . C78 . H781 . 119.5    no
C79 . C78 . H781 . 119.1    no
C78 . C79 . C80 . 118.2(4)    yes
C78 . C79 . H791 . 122.1    no
C80 . C79 . H791 . 119.7    no
C79 . C80 . C81 . 120.9(4)    yes
C79 . C80 . H801 . 119.5    no
C81 . C80 . H801 . 119.6    no
N6 . C81 . C80 . 121.9(4)    yes
N6 . C81 . C76 . 117.8(3)    yes
C80 . C81 . C76 . 120.3(4)    yes
N6 . C82 . C83 . 119.7(4)    yes
N6 . C82 . C87 . 120.2(4)    yes
C83 . C82 . C87 . 119.8(4)    yes
C82 . C83 . Cl16 . 119.5(4)    yes
C82 . C83 . C84 . 118.8(4)    yes
Cl16 . C83 . C84 . 121.7(4)    yes
C83 . C84 . C85 . 121.7(4)    yes
C83 . C84 . H841 . 116.4    no
C85 . C84 . H841 . 122.0    no
C84 . C85 . C86 . 119.5(4)    yes
C84 . C85 . H851 . 119.1    no
C86 . C85 . H851 . 121.3    no
C85 . C86 . C87 . 119.2(4)    yes
C85 . C86 . H861 . 117.2    no
C87 . C86 . H861 . 123.7    no
C82 . C87 . C86 . 121.0(4)    yes
C82 . C87 . Cl15 . 119.5(4)    yes
C86 . C87 . Cl15 . 119.4(4)    yes
O20 . C88 . O19 . 122.6(9)    yes
O20 . C88 . C89 . 117.8(9)    yes
O19 . C88 . C89 . 119.6(8)    yes
C88 . C89 . C90 . 132.8(8)    yes
C88 . C89 . H891 . 94.4    no
C90 . C89 . H891 . 103.3    no
C88 . C89 . H892 . 109.2    no
C90 . C89 . H892 . 105.5    no
H891 . C89 . H892 . 109.2    no
C89 . C90 . C91 . 120.8(8)    yes
C89 . C90 . C95 . 120.9(8)    yes
C91 . C90 . C95 . 118.2(9)    yes
C90 . C91 . C92 . 124.2(9)    yes
C90 . C91 . H911 . 116.9    no
C92 . C91 . H911 . 118.9    no
C91 . C92 . C93 . 119.1(9)    yes
C91 . C92 . H921 . 119.8    no
C93 . C92 . H921 . 121.1    no
C92 . C93 . C94 . 116.7(9)    yes
C92 . C93 . H931 . 120.9    no
C94 . C93 . H931 . 122.4    no
C93 . C94 . C95 . 125.5(9)    yes
C93 . C94 . H941 . 116.7    no
C95 . C94 . H941 . 117.7    no
C90 . C95 . C94 . 116.2(8)    yes
C90 . C95 . N7 . 117.8(8)    yes
C94 . C95 . N7 . 125.3(9)    yes
N7 . C96 . C97 . 124.3(8)    yes
N7 . C96 . C101 . 118.2(8)    yes
C97 . C96 . C101 . 117.3(8)    yes
C96 . C97 . Cl18 . 119.9(7)    yes
C96 . C97 . C98 . 119.5(8)    yes
Cl18 . C97 . C98 . 120.7(7)    yes
C97 . C98 . C99 . 122.6(9)    yes
C97 . C98 . H981 . 120.2    no
C99 . C98 . H981 . 117.1    no
C98 . C99 . C100 . 118.5(9)    yes
C98 . C99 . H991 . 122.3    no
C100 . C99 . H991 . 119.1    no
C99 . C100 . C101 . 119.3(9)    yes
C99 . C100 . H1001 . 121.7    no
C101 . C100 . H1001 . 118.9    no
C96 . C101 . C100 . 122.7(8)    yes
C96 . C101 . Cl17 . 120.4(7)    yes
C100 . C101 . Cl17 . 116.9(7)    yes
O22 . C102 . O21 . 109.6(8)    yes
O22 . C102 . C103 . 115.3(8)    yes
O21 . C102 . C103 . 135.1(9)    yes
C102 . C103 . C104 . 108.7(7)    yes
C102 . C103 . H1031 . 104.9    no
C104 . C103 . H1031 . 104.6    no
C102 . C103 . H1032 . 117.8    no
C104 . C103 . H1032 . 109.9    no
H1031 . C103 . H1032 . 110.0    no
C103 . C104 . C105 . 113.5(8)    yes
C103 . C104 . C109 . 125.6(8)    yes
C105 . C104 . C109 . 120.8(9)    yes
C104 . C105 . C106 . 117.5(9)    yes
C104 . C105 . H1051 . 122.2    no
C106 . C105 . H1051 . 119.0    no
C105 . C106 . C107 . 122.0(9)    yes
C105 . C106 . H1061 . 120.9    no
C107 . C106 . H1061 . 116.7    no
C106 . C107 . C108 . 120.9(9)    yes
C106 . C107 . H1071 . 122.5    no
C108 . C107 . H1071 . 116.6    no
C107 . C108 . C109 . 117.9(9)    yes
C107 . C108 . H1081 . 122.5    no
C109 . C108 . H1081 . 117.9    no
N8 . C109 . C108 . 120.0(8)    yes
N8 . C109 . C104 . 119.2(8)    yes
C108 . C109 . C104 . 120.8(8)    yes
N8 . C110 . C111 . 119.0(8)    yes
N8 . C110 . C115 . 120.9(8)    yes
C111 . C110 . C115 . 120.0(8)    yes
C110 . C111 . Cl19 . 115.3(7)    yes
C110 . C111 . C112 . 123.0(9)    yes
Cl19 . C111 . C112 . 121.7(7)    yes
C111 . C112 . C113 . 115.8(9)    yes
C111 . C112 . H1121 . 121.1    no
C113 . C112 . H1121 . 123.1    no
C112 . C113 . C114 . 123.0(9)    yes
C112 . C113 . H1131 . 117.5    no
C114 . C113 . H1131 . 119.5    no
C113 . C114 . C115 . 121.0(9)    yes
C113 . C114 . H1141 . 118.8    no
C115 . C114 . H1141 . 120.2    no
C110 . C115 . C114 . 117.3(9)    yes
C110 . C115 . Cl20 . 121.2(7)    yes
C114 . C115 . Cl20 . 121.6(7)    yes
O17 . C116 . H1161 . 109.4    no
O17 . C116 . H1162 . 110.0    no
H1161 . C116 . H1162 . 109.5    no
O17 . C116 . H1163 . 109.0    no
H1161 . C116 . H1163 . 109.5    no
H1162 . C116 . H1163 . 109.5    no
O18 . C117 . H1171 . 121.0    no
O18 . C117 . H1172 . 114.2    no
H1171 . C117 . H1172 . 106.5    no
O18 . C117 . H1173 . 102.8    no
H1171 . C117 . H1173 . 105.7    no
H1172 . C117 . H1173 . 105.0    no
loop_
 _geom_hbond_atom_site_label_D
 _geom_hbond_site_symmetry_D
 _geom_hbond_atom_site_label_H
 _geom_hbond_site_symmetry_H
 _geom_hbond_atom_site_label_A
 _geom_hbond_site_symmetry_A
 _geom_hbond_angle_DHA
 _geom_hbond_distance_DH
 _geom_hbond_distance_HA
 _geom_hbond_distance_DA
 _geom_hbond_publ_flag
N7 . H71 . O20 . 124 0.87 2.42 2.998(8)    yes
O8 . H81 . O20 . 149 0.93 2.35 3.189(8)    yes
O9 . H91 . O22 . 139 0.85 1.95 2.645(8)    yes
O17 . H171 . O10 . 146 0.73 1.97 2.603(8)    yes
C103 . H1032 . O3 . 143 0.97 2.49 3.318(8)    yes
C114 . H1141 . O24 . 165 0.93 2.06 2.967(8)    yes
C117 . H1171 . C103 . 161 0.96 2.39 3.317(8)    yes
C117 . H1171 . C104 . 146 0.96 2.34 3.183(8)    yes
N8 . H1184 . O21 . 142 0.87 2.34 3.076(8)    yes
N8 . H1184 . C102 . 132 0.87 2.35 3.004(8)    yes


_iucr_refine_instructions_details
;
#
# Punched on 27/02/23 at 13:15:49
#
#LIST     12                                                                    
BLOCK 
CONT SCALE 
CONT FE   (     1 ,X'S,U'S)  UNTIL O    (    17 ) 
CONT O    (    18 ,X'S,U[ISO]) 
CONT O    (    19 ,X'S,U'S)  UNTIL O    (    23 ) 
CONT O    (    24 ,X'S,U[ISO]) 
CONT N    (     1 ,X'S,U'S)  UNTIL C    (   116 ) 
CONT C    (   117 ,X'S,U[ISO]) 
RIDE O   (   8,X'S) H   (  81,X'S) 
RIDE O   (   9,X'S) H   (  91,X'S) 
RIDE O   (  10,X'S) H   ( 101,X'S) 
RIDE O   (  17,X'S) H   ( 171,X'S) 
RIDE O   (  18,X'S) H   (1190,X'S) 
RIDE O   (  20,X'S) H   (1189,X'S) 
RIDE O   (  22,X'S) H   ( 221,X'S) 
RIDE O   (  23,X'S) H   ( 234,X'S) H   ( 232,X'S) 
RIDE O   (  24,X'S) H   ( 243,X'S) H   ( 244,X'S) 
RIDE N   (   1,X'S) H   (  11,X'S) 
RIDE N   (   2,X'S) H   (1188,X'S) 
RIDE N   (   3,X'S) H   (  31,X'S) 
RIDE N   (   4,X'S) H   (1185,X'S) 
RIDE N   (   5,X'S) H   (1186,X'S) 
RIDE N   (   6,X'S) H   (1187,X'S) 
RIDE N   (   7,X'S) H   (  71,X'S) 
RIDE N   (   8,X'S) H   (1184,X'S) 
RIDE C   (   2,X'S) H   (  21,X'S) H   (  22,X'S) 
RIDE C   (   4,X'S) H   (  41,X'S) 
RIDE C   (   5,X'S) H   (  51,X'S) 
RIDE C   (   6,X'S) H   (  61,X'S) 
RIDE C   (   7,X'S) H   (1183,X'S) 
RIDE C   (  11,X'S) H   ( 111,X'S) 
RIDE C   (  12,X'S) H   ( 121,X'S) 
RIDE C   (  13,X'S) H   ( 131,X'S) 
RIDE C   (  16,X'S) H   ( 161,X'S) H   ( 162,X'S) 
RIDE C   (  18,X'S) H   ( 181,X'S) 
RIDE C   (  19,X'S) H   ( 191,X'S) 
RIDE C   (  20,X'S) H   ( 201,X'S) 
RIDE C   (  21,X'S) H   ( 211,X'S) 
RIDE C   (  25,X'S) H   ( 251,X'S) 
RIDE C   (  26,X'S) H   ( 261,X'S) 
RIDE C   (  27,X'S) H   ( 271,X'S) 
RIDE C   (  30,X'S) H   ( 301,X'S) H   ( 302,X'S) 
RIDE C   (  32,X'S) H   ( 321,X'S) 
RIDE C   (  33,X'S) H   ( 331,X'S) 
RIDE C   (  34,X'S) H   ( 341,X'S) 
RIDE C   (  35,X'S) H   ( 351,X'S) 
RIDE C   (  39,X'S) H   ( 391,X'S) 
RIDE C   (  40,X'S) H   ( 401,X'S) 
RIDE C   (  41,X'S) H   ( 411,X'S) 
RIDE C   (  43,X'S) H   ( 431,X'S) H   ( 432,X'S) H   ( 433,X'S) 
RIDE C   (  44,X'S) H   ( 441,X'S) H   ( 442,X'S) H   ( 443,X'S) 
RIDE C   (  45,X'S) H   ( 451,X'S) H   ( 452,X'S) H   ( 453,X'S) 
RIDE C   (  47,X'S) H   ( 471,X'S) H   ( 472,X'S) 
RIDE C   (  49,X'S) H   ( 491,X'S) 
RIDE C   (  50,X'S) H   ( 501,X'S) 
RIDE C   (  51,X'S) H   ( 511,X'S) 
RIDE C   (  52,X'S) H   ( 521,X'S) 
RIDE C   (  56,X'S) H   ( 561,X'S) 
RIDE C   (  57,X'S) H   ( 571,X'S) 
RIDE C   (  58,X'S) H   ( 581,X'S) 
RIDE C   (  61,X'S) H   ( 611,X'S) H   ( 612,X'S) 
RIDE C   (  63,X'S) H   ( 631,X'S) 
RIDE C   (  64,X'S) H   ( 641,X'S) 
RIDE C   (  65,X'S) H   ( 651,X'S) 
RIDE C   (  66,X'S) H   ( 661,X'S) 
RIDE C   (  70,X'S) H   ( 701,X'S) 
RIDE C   (  71,X'S) H   ( 711,X'S) 
RIDE C   (  72,X'S) H   ( 721,X'S) 
RIDE C   (  75,X'S) H   ( 751,X'S) H   ( 752,X'S) 
RIDE C   (  77,X'S) H   ( 771,X'S) 
RIDE C   (  78,X'S) H   ( 781,X'S) 
RIDE C   (  79,X'S) H   ( 791,X'S) 
RIDE C   (  80,X'S) H   ( 801,X'S) 
RIDE C   (  84,X'S) H   ( 841,X'S) 
RIDE C   (  85,X'S) H   ( 851,X'S) 
RIDE C   (  86,X'S) H   ( 861,X'S) 
RIDE C   (  89,X'S) H   ( 891,X'S) H   ( 892,X'S) 
RIDE C   (  91,X'S) H   ( 911,X'S) 
RIDE C   (  92,X'S) H   ( 921,X'S) 
RIDE C   (  93,X'S) H   ( 931,X'S) 
RIDE C   (  94,X'S) H   ( 941,X'S) 
RIDE C   (  98,X'S) H   ( 981,X'S) 
RIDE C   (  99,X'S) H   ( 991,X'S) 
RIDE C   ( 100,X'S) H   (1001,X'S) 
RIDE C   ( 103,X'S) H   (1031,X'S) H   (1032,X'S) 
RIDE C   ( 105,X'S) H   (1051,X'S) 
RIDE C   ( 106,X'S) H   (1061,X'S) 
RIDE C   ( 107,X'S) H   (1071,X'S) 
RIDE C   ( 108,X'S) H   (1081,X'S) 
RIDE C   ( 112,X'S) H   (1121,X'S) 
RIDE C   ( 113,X'S) H   (1131,X'S) 
RIDE C   ( 114,X'S) H   (1141,X'S) 
RIDE C   ( 116,X'S) H   (1161,X'S) H   (1162,X'S) H   (1163,X'S) 
RIDE C   ( 117,X'S) H   (1171,X'S) H   (1172,X'S) H   (1173,X'S) 
END                                                                             
#
# Punched on 27/02/23 at 13:15:49
#
#LIST     16                                                                    
NO 
REM   HREST   START (DO NOT REMOVE THIS LINE) 
REM   HREST   END (DO NOT REMOVE THIS LINE) 
END                                                                             
;
# looking for ARCHIVE-HKL.CIF 
 
_iucr_refine_reflections_details 
; 
# An asterisk in column 34 indicates a format overflow 
# Data was input as F-squared 
  -1   0   0    0.05    0.01 
  -1   0   0   -0.09    0.01 
  -1   0   0    0.00    0.01 
   1   0   0    0.16    0.02 
   1   0   0    0.02    0.01 
   1   0   0    0.05    0.01 
   2   0   0  507.96    5.91 
  -3   0   0  121.82    0.99 
  -3   0   0  126.09    0.98 
  -3   0   0  123.17    0.98 
  -3   0   0  126.18    0.98 
   3   0   0  123.32    0.97 
   3   0   0  123.03    1.01 
   3   0   0  125.20    0.98 
   3   0   0  125.62    0.99 
  -4   0   0  163.50    2.96 
  -4   0   0  166.94    2.95 
  -4   0   0  160.46    2.95 
   4   0   0  165.16    2.96 
   4   0   0  167.10    2.95 
   4   0   0  159.46    2.96 
  -5   0   0   84.87    1.29 
  -5   0   0   88.18    1.25 
  -5   0   0   87.43    1.25 
   5   0   0   88.48    1.24 
   5   0   0   87.77    1.25 
   5   0   0   85.47    1.27 
   5   0   0   84.72    1.31 
  -6   0   0    3.22    0.31 
  -6   0   0    3.12    0.21 
   6   0   0    3.30    0.36 
   6   0   0    2.79    0.31 
   6   0   0    3.17    0.21 
   6   0   0    3.52    0.26 
  -7   0   0   11.65    0.35 
  -7   0   0   13.10    0.28 
   7   0   0   12.78    0.27 
   7   0   0   12.01    0.35 
   7   0   0   11.24    0.39 
  -8   0   0    2.54    0.27 
  -8   0   0    3.26    0.39 
   8   0   0    2.28    0.38 
   8   0   0    2.85    0.27 
   8   0   0    1.76    0.43 
  -9   0   0   21.92    0.75 
   9   0   0   21.18    0.66 
   9   0   0   22.07    0.69 
 -10   0   0    1.60    0.53 
  10   0   0    0.92    0.48 
  10   0   0    2.51    0.38 
  10   0   0    1.81    0.56 
 -11   0   0    7.67    0.56 
 -11   0   0    8.39    0.41 
  11   0   0    8.59    0.40 
  11   0   0    7.06    0.63 
  11   0   0    6.74    0.52 
 -12   0   0    3.13    0.57 
 -12   0   0    1.67    0.38 
  12   0   0    2.27    0.40 
  12   0   0    1.77    0.66 
  12   0   0    1.75    0.51 
 -13   0   0    1.43    0.60 
 -13   0   0    1.32    0.43 
  13   0   0    0.49    0.60 
  13   0   0    1.12    0.74 
  13   0   0    1.27    0.41 
 -14   0   0    0.02    0.63 
 -14   0   0   -0.35    0.41 
  14   0   0   -0.32    0.63 
  14   0   0   -0.14    0.74 
  14   0   0   -0.08    0.42 
 -15   0   0    0.32    0.48 
 -15   0   0    0.45    0.73 
  15   0   0   -0.43    0.69 
  15   0   0    0.22    0.81 
 -16   0   0    0.08    0.77 
  16   0   0    0.79    0.73 
  16   0   0    0.48    0.89 
  17   0   0    0.35    0.81 
  18   0   0    0.81    0.84 
  19   0   0    0.46    0.87 
  19  -1   0    1.10    0.96 
  18  -1   0    2.61    0.86 
  17  -1   0    1.43    0.81 
  16  -1   0    2.98    0.76 
  16  -1   0    3.17    0.87 
 -16   1   0    1.77    0.75 
  15  -1   0    0.17    0.71 
  15  -1   0    0.79    0.80 
 -15   1   0    0.48    0.70 
 -15   1   0    0.58    0.48 
  14  -1   0   29.10    0.91 
  14  -1   0   28.34    0.70 
  14  -1   0   29.45    0.54 
 -14   1   0   29.38    0.74 
 -14   1   0   30.27    0.57 
  13  -1   0    0.44    0.42 
  13  -1   0   -0.46    0.62 
  13  -1   0   -0.85    0.73 
 -13   1   0    0.58    0.62 
 -13   1   0   -0.15    0.40 
  12  -1   0    6.73    0.56 
  12  -1   0    6.58    0.68 
  12  -1   0    7.96    0.43 
 -12   1   0    8.12    0.62 
 -12   1   0    7.51    0.42 
  11  -1   0    0.73    0.62 
  11  -1   0    0.55    0.54 
  11  -1   0    0.83    0.37 
 -11   1   0    0.26    0.35 
 -11   1   0    0.41    0.56 
  10  -1   0  234.56    2.88 
  10  -1   0  235.41    2.76 
  10  -1   0  229.20    2.80 
 -10   1   0  232.35    2.84 
 -10   1   0  232.91    2.76 
   9  -1   0   43.47    0.70 
   9  -1   0   44.66    0.89 
  -9   1   0   43.44    0.70 
  -9   1   0   45.10    0.85 
   8  -1   0   40.73    0.91 
   8  -1   0   38.44    0.71 
   8  -1   0   38.38    0.78 
  -8   1   0   40.50    0.83 
  -8   1   0   37.40    0.72 
   7  -1   0   16.99    0.25 
   7  -1   0   16.56    0.40 
   7  -1   0   16.83    0.35 
  -7   1   0   17.09    0.36 
  -7   1   0   16.80    0.25 
   6  -1   0   14.01    0.26 
   6  -1   0   13.63    0.38 
   6  -1   0   13.54    0.35 
   6  -1   0   14.38    0.30 
  -6   1   0   14.02    0.35 
  -6   1   0   14.08    0.27 
   5  -1   0   23.43    0.34 
   5  -1   0   24.24    0.45 
   5  -1   0   23.49    0.41 
   5  -1   0   24.28    0.42 
  -5   1   0   23.18    0.34 
  -5   1   0   24.37    0.52 
  -5   1   0   23.80    0.40 
   4  -1   0   44.46    0.45 
   4  -1   0   45.07    0.55 
   4  -1   0   45.60    0.60 
   4  -1   0   44.43    0.51 
   4  -1   0   45.53    0.52 
  -4   1   0   45.45    0.52 
  -4   1   0   46.16    0.60 
  -4   1   0   43.70    0.51 
   3  -1   0  146.87    1.71 
   3  -1   0  147.39    1.70 
   3  -1   0  148.52    1.72 
   3  -1   0  147.36    1.72 
   3  -1   0  146.77    1.73 
  -3   1   0  147.71    1.71 
  -3   1   0  146.37    1.73 
   2  -1   0   58.05    0.62 
   2  -1   0   57.87    0.63 
   1  -1   0    0.07    0.01 
   1  -1   0    0.00    0.02 
   1  -1   0    0.05    0.01 
   1  -1   0    0.19    0.02 
  -1   1   0    0.23    0.02 
  -1   1   0    0.07    0.02 
  -1   1   0    0.11    0.01 
  -1   1   0    0.02    0.00 
   0   1   0    0.11    0.01 
  -1  -1   0   -0.04    0.01 
  -1  -1   0    0.35    0.02 
  -1  -1   0    0.00    0.02 
  -1  -1   0   -0.42    0.02 
  -1  -1   0   -0.18    0.02 
   1   1   0   -0.14    0.01 
   1   1   0    0.11    0.02 
   1   1   0    0.00    0.01 
  -2  -1   0    7.04    0.35 
  -3  -1   0   15.77    0.38 
  -3  -1   0   14.52    0.38 
  -3  -1   0   16.31    0.38 
   3   1   0   15.00    0.39 
   3   1   0   15.81    0.38 
   3   1   0   15.97    0.37 
  -4  -1   0    2.36    0.27 
  -4  -1   0    3.39    0.24 
  -4  -1   0    3.14    0.25 
  -4  -1   0    3.53    0.21 
   4   1   0    3.47    0.24 
   4   1   0    2.94    0.26 
   4   1   0    3.52    0.21 
  -5  -1   0    4.28    0.30 
  -5  -1   0    5.14    0.28 
   5   1   0    3.97    0.33 
   5   1   0    5.26    0.32 
  -6  -1   0   21.50    0.52 
  -6  -1   0   20.38    0.63 
  -6  -1   0   21.87    0.53 
   6   1   0   20.17    0.66 
   6   1   0   21.41    0.52 
   6   1   0   20.35    0.57 
  -7  -1   0    0.82    0.33 
  -7  -1   0    1.16    0.24 
   7   1   0    1.32    0.23 
   7   1   0    0.39    0.37 
   7   1   0    0.68    0.32 
  -8  -1   0  133.17    2.11 
  -8  -1   0  127.99    2.05 
   8   1   0  133.98    2.15 
   8   1   0  128.07    2.08 
   8   1   0  128.97    2.05 
  -9  -1   0   30.80    0.77 
   9   1   0   30.52    0.69 
   9   1   0   29.26    0.66 
 -10  -1   0   25.22    0.60 
 -10  -1   0   24.32    0.47 
  10   1   0   24.14    0.57 
  10   1   0   24.51    0.46 
  10   1   0   26.06    0.66 
 -11  -1   0    2.82    0.53 
 -11  -1   0    2.53    0.36 
  11   1   0    2.19    0.59 
  11   1   0    1.69    0.48 
  11   1   0    2.41    0.37 
 -12  -1   0    1.53    0.56 
 -12  -1   0    1.47    0.38 
  12   1   0    0.80    0.54 
  12   1   0    1.29    0.37 
  12   1   0    1.37    0.65 
 -13  -1   0    3.46    0.59 
 -13  -1   0    3.57    0.42 
  13   1   0    2.96    0.74 
  13   1   0    3.33    0.58 
  13   1   0    3.30    0.40 
 -14  -1   0    0.92    0.61 
 -14  -1   0   -0.13    0.42 
  14   1   0   -0.18    0.45 
  14   1   0    0.81    0.76 
  14   1   0   -0.18    0.63 
 -15  -1   0    1.59    0.71 
 -15  -1   0    0.69    0.44 
  15   1   0    1.19    0.71 
  15   1   0    1.46    0.84 
  16   1   0    1.63    0.69 
  17   1   0    1.70    0.81 
  18   1   0    1.07    0.82 
  19   1   0    1.26    0.84 
  19  -2   0    0.53    0.88 
  18  -2   0    0.31    0.82 
  17  -2   0    1.59    0.79 
  16  -2   0    0.03    0.81 
  16  -2   0    0.81    0.74 
 -16   2   0    0.85    0.77 
  15  -2   0    0.66    0.66 
  15  -2   0    0.92    0.88 
 -15   2   0    1.55    0.75 
  14  -2   0    9.72    0.72 
  14  -2   0    9.86    0.50 
  14  -2   0    9.64    0.87 
 -14   2   0   10.13    0.75 
 -14   2   0    9.38    0.53 
  13  -2   0    4.23    0.45 
  13  -2   0    3.61    0.68 
  13  -2   0    3.62    0.77 
 -13   2   0    3.89    0.44 
 -13   2   0    4.32    0.65 
  12  -2   0    0.04    0.52 
  12  -2   0   -0.77    0.66 
  12  -2   0    0.80    0.41 
 -12   2   0    0.36    0.57 
 -12   2   0    0.51    0.38 
  11  -2   0    8.88    0.72 
  11  -2   0    8.16    0.61 
  11  -2   0    9.40    0.49 
 -11   2   0    8.63    0.48 
 -11   2   0    8.78    0.66 
   9  -2   0   29.39    1.23 
   9  -2   0   31.18    1.17 
   9  -2   0   33.49    1.33 
  -9   2   0   33.51    1.30 
  -9   2   0   31.26    1.18 
   8  -2   0   87.08    1.18 
   8  -2   0   85.16    1.24 
   8  -2   0   87.59    1.31 
  -8   2   0   86.63    1.17 
  -8   2   0   87.77    1.28 
   7  -2   0    1.54    0.39 
   7  -2   0    1.88    0.25 
   7  -2   0    2.88    0.46 
   7  -2   0    1.37    0.28 
  -7   2   0    3.21    0.42 
  -7   2   0    1.03    0.28 
   6  -2   0   42.55    0.73 
   6  -2   0   44.02    0.86 
   6  -2   0   44.92    0.76 
   6  -2   0   42.98    0.68 
   6  -2   0   43.28    0.80 
  -6   2   0   42.67    0.73 
  -6   2   0   44.22    0.82 
   5  -2   0    6.08    0.31 
   5  -2   0    7.65    0.20 
   5  -2   0    8.02    0.25 
   5  -2   0    7.00    0.29 
   5  -2   0    8.07    0.23 
  -5   2   0    7.22    0.23 
  -5   2   0    7.77    0.22 
  -5   2   0    6.45    0.28 
   4  -2   0   70.66    0.74 
   4  -2   0   70.82    0.74 
   4  -2   0   69.72    0.71 
   4  -2   0   67.39    0.80 
   4  -2   0   69.71    0.76 
  -4   2   0   70.17    0.74 
   3  -2   0   56.93    0.35 
   3  -2   0   57.85    0.33 
   3  -2   0   57.69    0.32 
  -3   2   0   55.70    0.38 
  -3   2   0   56.83    0.33 
   2  -2   0  229.85    2.44 
   2  -2   0  218.78    2.44 
  -2   2   0  224.13    2.44 
   1  -2   0    0.26    0.03 
   1  -2   0    0.05    0.02 
  -1   2   0    0.12    0.01 
   0  -2   0    0.23    0.03 
  -1  -2   0    1.16    0.02 
  -1  -2   0    1.12    0.05 
  -1  -2   0    1.30    0.07 
  -1  -2   0    1.15    0.03 
  -1  -2   0    1.22    0.03 
   1   2   0    1.47    0.08 
   1   2   0    1.26    0.03 
  -2  -2   0    1.22    0.07 
  -2  -2   0    1.39    0.07 
  -2  -2   0    1.58    0.09 
  -2  -2   0    1.50    0.10 
  -2  -2   0    1.22    0.10 
  -2  -2   0    1.07    0.21 
  -2  -2   0    1.45    0.11 
  -2  -2   0    1.42    0.11 
   2   2   0    1.47    0.11 
   2   2   0    1.46    0.07 
   2   2   0    1.82    0.13 
   2   2   0    1.26    0.07 
   2   2   0    1.04    0.27 
   2   2   0    1.71    0.11 
   2   2   0    1.35    0.10 
   2   2   0    1.46    0.09 
  -3  -2   0   87.24    1.04 
  -3  -2   0   89.35    0.99 
  -3  -2   0   87.28    0.98 
  -3  -2   0   87.82    0.99 
  -3  -2   0   87.76    0.97 
  -3  -2   0   88.34    1.01 
   3   2   0   87.21    1.03 
   3   2   0   85.94    0.99 
   3   2   0   88.92    0.99 
   3   2   0   88.08    0.97 
   3   2   0   87.93    0.98 
   3   2   0   87.31    0.98 
   3   2   0   88.10    1.01 
  -4  -2   0    1.72    0.24 
  -4  -2   0    1.63    0.21 
  -4  -2   0    1.94    0.27 
  -4  -2   0    2.26    0.21 
   4   2   0    1.69    0.19 
   4   2   0    1.72    0.27 
   4   2   0    2.49    0.31 
   4   2   0    1.53    0.20 
   4   2   0    1.75    0.23 
   4   2   0    1.76    0.27 
  -5  -2   0    2.35    0.27 
  -5  -2   0    1.85    0.21 
  -5  -2   0    2.52    0.28 
  -5  -2   0    3.16    0.32 
   5   2   0    2.17    0.21 
   5   2   0    1.78    0.29 
   5   2   0    2.16    0.17 
   5   2   0    2.40    0.35 
   5   2   0    2.38    0.24 
   5   2   0    2.17    0.29 
  -6  -2   0    2.49    0.31 
  -6  -2   0    2.15    0.26 
  -6  -2   0    1.83    0.22 
  -6  -2   0    3.04    0.32 
   6   2   0    2.05    0.22 
   6   2   0    1.57    0.30 
   6   2   0    2.31    0.35 
   6   2   0    2.38    0.29 
  -7  -2   0    1.82    0.33 
  -7  -2   0    1.93    0.23 
  -7  -2   0    1.92    0.25 
   7   2   0    2.12    0.29 
   7   2   0    1.20    0.35 
   7   2   0    1.37    0.31 
   7   2   0    1.96    0.22 
  -8  -2   0   35.12    0.49 
  -8  -2   0   33.17    0.51 
  -8  -2   0   35.99    0.53 
   8   2   0   34.40    0.50 
   8   2   0   36.40    0.54 
   8   2   0   34.28    0.52 
  -9  -2   0    1.03    0.30 
  -9  -2   0    1.09    0.41 
   9   2   0    1.10    0.28 
   9   2   0    0.75    0.36 
   9   2   0    0.61    0.39 
   9   2   0    0.84    0.47 
 -10  -2   0   17.63    0.37 
  10   2   0   17.82    0.36 
  10   2   0   18.87    0.58 
  10   2   0   17.34    0.48 
 -11  -2   0   12.53    0.42 
 -11  -2   0   12.58    0.57 
  11   2   0   11.49    0.53 
  11   2   0   12.08    0.62 
  11   2   0   12.12    0.40 
 -12  -2   0    2.92    0.40 
 -12  -2   0    4.80    0.62 
  12   2   0    3.24    0.55 
  12   2   0    4.14    0.67 
  12   2   0    3.68    0.40 
 -13  -2   0    0.88    0.60 
 -13  -2   0    0.38    0.42 
  13   2   0    0.42    0.59 
  13   2   0    0.03    0.42 
  13   2   0   -0.30    0.67 
 -14  -2   0    1.40    0.63 
 -14  -2   0    0.38    0.41 
  14   2   0    0.41    0.41 
  14   2   0    0.66    0.75 
  14   2   0    1.09    0.67 
 -15  -2   0    0.68    0.67 
 -15  -2   0   -0.15    0.44 
  15   2   0    0.80    0.67 
  15   2   0    1.28    0.80 
 -16  -2   0   -0.14    0.49 
  16   2   0    0.90    0.73 
  17   2   0    0.91    0.76 
  18   2   0    0.82    0.79 
  19   2   0    1.41    0.87 
  19  -3   0    1.94    1.00 
  18  -3   0    1.48    0.89 
  17  -3   0    2.01    0.87 
 -17   3   0    1.42    0.83 
  16  -3   0    3.85    0.88 
  16  -3   0    3.86    0.75 
 -16   3   0    4.20    0.74 
  15  -3   0    6.04    0.69 
  15  -3   0    6.47    0.83 
 -15   3   0    6.28    0.74 
  14  -3   0    4.43    0.70 
  14  -3   0    4.97    0.79 
  14  -3   0    4.64    0.59 
 -14   3   0    5.01    0.51 
 -14   3   0    5.17    0.67 
  13  -3   0    0.56    0.74 
  13  -3   0    0.85    0.60 
  13  -3   0    1.63    0.43 
 -13   3   0    0.71    0.44 
 -13   3   0    1.67    0.64 
  12  -3   0   46.03    0.88 
  12  -3   0   47.87    0.77 
  12  -3   0   45.15    0.76 
 -12   3   0   46.04    0.80 
 -12   3   0   46.31    0.62 
  11  -3   0    5.74    0.39 
  11  -3   0    5.30    0.55 
  11  -3   0    5.33    0.63 
 -11   3   0    5.13    0.54 
 -11   3   0    5.23    0.37 
  10  -3   0  234.12    2.12 
  10  -3   0  240.20    2.30 
  10  -3   0  229.77    2.18 
 -10   3   0  237.47    2.23 
 -10   3   0  233.05    2.11 
   9  -3   0    8.14    0.47 
   9  -3   0    8.74    0.56 
   9  -3   0    9.42    0.37 
  -9   3   0    9.02    0.36 
  -9   3   0    9.03    0.49 
   8  -3   0  163.74    2.24 
   8  -3   0  164.85    2.20 
   8  -3   0  160.44    2.16 
   8  -3   0  170.60    2.30 
  -8   3   0  167.89    2.27 
  -8   3   0  163.36    2.19 
   7  -3   0    2.46    0.27 
   7  -3   0    1.87    0.37 
   7  -3   0    2.75    0.24 
   7  -3   0    1.89    0.41 
  -7   3   0    2.82    0.37 
  -7   3   0    2.13    0.25 
   6  -3   0   81.38    1.14 
   6  -3   0   78.93    1.16 
   6  -3   0   80.00    1.10 
   6  -3   0   79.92    1.23 
   6  -3   0   78.79    1.12 
  -6   3   0   79.44    1.13 
  -6   3   0   80.31    1.18 
   5  -3   0   42.88    0.46 
   5  -3   0   42.96    0.43 
   5  -3   0   43.46    0.47 
   5  -3   0   41.17    0.49 
   5  -3   0   41.44    0.51 
  -5   3   0   42.25    0.55 
  -5   3   0   42.77    0.45 
   4  -3   0   81.29    1.18 
   4  -3   0   80.73    1.15 
   4  -3   0   78.48    1.13 
   4  -3   0   79.12    1.13 
  -4   3   0   81.05    1.13 
  -4   3   0   81.13    1.17 
   3  -3   0  180.37    2.94 
   3  -3   0  178.59    2.93 
   3  -3   0  179.77    2.95 
   3  -3   0  174.41    2.95 
  -3   3   0  174.24    2.95 
  -3   3   0  176.42    2.93 
  -3   3   0  180.46    2.94 
  -3   3   0  178.74    2.93 
   2  -3   0    2.16    0.13 
   2  -3   0    2.01    0.11 
   2  -3   0    1.72    0.19 
   2  -3   0    1.68    0.14 
  -2   3   0    2.06    0.11 
  -2   3   0    2.33    0.12 
  -2   3   0    2.10    0.19 
   1  -3   0    3.79    0.26 
   1  -3   0    3.13    0.31 
  -1   3   0    4.03    0.26 
  -1   3   0    3.44    0.31 
   0  -3   0    7.58    0.28 
   0   3   0    7.50    0.27 
  -1  -3   0   16.99    0.67 
  -1  -3   0   17.55    0.65 
  -1  -3   0   15.54    0.62 
  -1  -3   0   15.80    0.61 
  -1  -3   0   15.68    0.61 
   1   3   0   17.09    0.64 
   1   3   0   16.54    0.66 
  -2  -3   0  174.42    2.27 
  -2  -3   0  178.25    2.36 
  -2  -3   0  178.08    2.28 
  -2  -3   0  170.76    2.27 
  -2  -3   0  174.40    2.28 
  -2  -3   0  171.96    2.31 
   2   3   0  173.02    2.31 
   2   3   0  174.70    2.28 
   2   3   0  178.26    2.36 
   2   3   0  175.40    2.27 
   2   3   0  175.96    2.27 
   2   3   0  171.04    2.27 
  -3  -3   0   45.98    0.79 
  -3  -3   0   45.68    0.71 
  -3  -3   0   45.04    0.70 
  -3  -3   0   48.40    0.88 
  -3  -3   0   47.79    0.72 
  -3  -3   0   46.23    0.71 
   3   3   0   45.12    0.70 
   3   3   0   45.81    0.70 
   3   3   0   47.19    0.71 
   3   3   0   46.06    0.80 
   3   3   0   47.24    0.72 
   3   3   0   48.00    0.90 
  -4  -3   0  356.98    5.86 
  -4  -3   0  353.92    5.89 
  -4  -3   0  347.94    5.91 
  -4  -3   0  355.49    5.87 
  -4  -3   0  358.59    5.87 
  -4  -3   0  354.39    5.86 
   4   3   0  355.29    5.98 
   4   3   0  356.80    5.88 
   4   3   0  354.36    5.86 
   4   3   0  357.01    5.87 
   4   3   0  359.77    5.89 
   4   3   0  354.00    5.91 
   4   3   0  356.53    5.87 
   4   3   0  353.58    5.86 
  -5  -3   0    9.65    0.29 
  -5  -3   0   10.22    0.36 
  -5  -3   0   10.86    0.38 
  -5  -3   0    9.33    0.33 
  -5  -3   0    9.40    0.30 
   5   3   0    9.87    0.31 
   5   3   0    9.26    0.29 
   5   3   0    9.77    0.36 
   5   3   0   10.40    0.41 
   5   3   0    9.60    0.42 
   5   3   0    9.44    0.28 
   5   3   0   11.19    0.57 
  -6  -3   0   43.36    0.77 
  -6  -3   0   42.35    0.77 
  -6  -3   0   41.80    0.77 
   6   3   0   43.26    0.75 
   6   3   0   41.04    0.78 
   6   3   0   43.91    0.91 
   6   3   0   42.56    0.69 
  -7  -3   0   50.28    0.68 
  -7  -3   0   48.77    0.58 
  -7  -3   0   49.07    0.56 
   7   3   0   49.61    0.74 
   7   3   0   48.94    0.55 
   7   3   0   49.91    0.79 
   7   3   0   49.15    0.61 
  -8  -3   0    2.16    0.39 
  -8  -3   0    1.63    0.31 
  -8  -3   0    1.75    0.27 
   8   3   0    1.71    0.26 
   8   3   0    1.34    0.35 
   8   3   0    1.69    0.37 
   8   3   0    0.71    0.40 
  -9  -3   0   35.92    0.87 
  -9  -3   0   35.89    0.72 
  -9  -3   0   35.38    0.73 
   9   3   0   35.44    0.94 
   9   3   0   36.14    0.73 
   9   3   0   35.47    0.89 
   9   3   0   34.45    0.77 
 -10  -3   0   18.40    0.51 
 -10  -3   0   18.93    0.38 
  10   3   0   18.95    0.37 
  10   3   0   18.07    0.53 
  10   3   0   18.44    0.48 
 -11  -3   0    0.24    0.36 
 -11  -3   0    1.20    0.52 
  11   3   0   -0.15    0.49 
  11   3   0    0.25    0.56 
  11   3   0    0.71    0.35 
 -12  -3   0    4.32    0.55 
 -12  -3   0    3.97    0.39 
  12   3   0    4.26    0.37 
  12   3   0    4.05    0.63 
  12   3   0    3.77    0.53 
 -13  -3   0    6.87    0.43 
 -13  -3   0    8.19    0.63 
  13   3   0    7.70    0.41 
  13   3   0    7.10    0.59 
  13   3   0    7.43    0.69 
 -14  -3   0    5.38    0.45 
 -14  -3   0    5.32    0.63 
  14   3   0    5.34    0.74 
  14   3   0    5.50    0.62 
  14   3   0    5.78    0.45 
 -15  -3   0    3.25    0.74 
 -15  -3   0    2.71    0.47 
  15   3   0    2.55    0.67 
  15   3   0    2.76    1.04 
 -16  -3   0    3.32    0.56 
  16   3   0    3.49    0.74 
  17   3   0    0.86    0.75 
  18   3   0   11.86    0.79 
  19   3   0    1.22    0.85 
  18  -4   0    1.48    0.93 
  17  -4   0    1.60    0.94 
  17  -4   0    2.43    0.81 
 -17   4   0    2.50    0.76 
  16  -4   0    2.62    0.81 
  16  -4   0    3.03    0.94 
 -16   4   0    2.29    0.76 
  15  -4   0    0.48    0.69 
  15  -4   0    0.34    0.87 
 -15   4   0    1.31    0.74 
  14  -4   0    9.03    0.80 
  14  -4   0    9.14    0.69 
 -14   4   0   10.28    0.74 
  13  -4   0   20.06    0.68 
  13  -4   0   19.79    0.78 
  13  -4   0   20.08    0.49 
 -13   4   0   20.37    0.70 
 -13   4   0   20.40    0.51 
  12  -4   0    5.27    0.60 
  12  -4   0    5.53    0.70 
  12  -4   0    5.80    0.41 
 -12   4   0    6.44    0.60 
 -12   4   0    5.70    0.42 
  11  -4   0   26.02    0.44 
  11  -4   0   26.57    0.52 
  11  -4   0   27.77    0.78 
  11  -4   0   25.28    0.68 
 -11   4   0   26.07    0.51 
 -11   4   0   27.55    0.68 
  10  -4   0    4.58    0.49 
  10  -4   0    5.89    0.37 
  10  -4   0    4.39    0.27 
  10  -4   0    5.34    0.58 
 -10   4   0    6.13    0.55 
 -10   4   0    5.38    0.35 
   9  -4   0   14.54    0.35 
   9  -4   0   13.68    0.51 
   9  -4   0   16.48    0.63 
   9  -4   0   14.87    0.40 
  -9   4   0   16.49    0.57 
  -9   4   0   14.61    0.39 
   8  -4   0   42.77    0.59 
   8  -4   0   42.45    0.64 
   8  -4   0   45.18    0.80 
  -8   4   0   42.56    0.57 
   7  -4   0    4.62    0.42 
   7  -4   0    6.59    0.33 
   7  -4   0    5.35    0.39 
   7  -4   0    6.13    0.27 
   7  -4   0    6.65    0.29 
  -7   4   0    5.94    0.38 
  -7   4   0    5.80    0.25 
   6  -4   0   25.14    0.51 
   6  -4   0   25.04    0.53 
   6  -4   0   26.12    0.46 
   6  -4   0   26.48    0.51 
   6  -4   0   26.38    0.49 
  -6   4   0   26.04    0.60 
   5  -4   0    8.85    0.36 
   5  -4   0    8.64    0.29 
   5  -4   0    9.42    0.40 
   5  -4   0    9.44    0.34 
  -5   4   0   10.16    0.37 
  -5   4   0    9.42    0.29 
  -5   4   0    8.28    0.24 
   4  -4   0   43.06    0.86 
   4  -4   0   42.59    0.92 
   4  -4   0   42.71    0.89 
   4  -4   0   43.11    0.89 
  -4   4   0   43.09    0.85 
  -4   4   0   43.30    0.86 
  -4   4   0   43.03    0.91 
   3  -4   0   12.92    0.16 
   3  -4   0   13.00    0.21 
   3  -4   0   12.60    0.25 
   3  -4   0   12.73    0.22 
  -3   4   0   12.97    0.15 
  -3   4   0   13.09    0.21 
  -3   4   0   12.98    0.26 
  -3   4   0   13.33    0.14 
   2  -4   0   46.88    0.84 
   2  -4   0   48.29    0.88 
   2  -4   0   46.92    0.82 
   2  -4   0   46.86    0.81 
  -2   4   0   46.81    0.81 
  -2   4   0   47.40    0.87 
   1  -4   0  201.51    3.02 
  -1   4   0  199.78    3.02 
   0  -4   0  107.41    1.49 
   0   4   0  108.16    1.49 
  -1  -4   0   46.05    0.52 
  -1  -4   0   48.44    0.73 
  -1  -4   0   46.78    0.57 
  -1  -4   0   46.89    0.63 
   1   4   0   47.01    0.57 
   1   4   0   46.33    0.63 
  -2  -4   0   14.08    0.46 
  -2  -4   0   13.33    0.40 
  -2  -4   0   13.49    0.66 
  -2  -4   0   13.62    0.41 
  -2  -4   0   13.65    0.41 
  -2  -4   0   13.86    0.55 
  -2  -4   0   13.27    0.46 
   2   4   0   13.18    0.45 
   2   4   0   13.54    0.39 
   2   4   0   13.19    0.52 
   2   4   0   14.03    0.46 
   2   4   0   12.73    0.67 
  -3  -4   0  963.10   13.71 
  -3  -4   0 1000.00   13.74 
  -3  -4   0  974.39   13.74 
  -3  -4   0  989.94   13.70 
  -3  -4   0  976.78   13.70 
  -3  -4   0  965.44   13.78 
  -3  -4   0  990.03   13.71 
  -3  -4   0  984.53   13.70 
   3   4   0  980.40   13.71 
   3   4   0  969.43   13.71 
   3   4   0  985.60   13.70 
   3   4   0  974.11   13.79 
   3   4   0  977.82   13.70 
   3   4   0  977.25   13.70 
   3   4   0  986.83   13.74 
  -4  -4   0   86.84    1.23 
  -4  -4   0   88.09    1.24 
  -4  -4   0   89.85    1.25 
  -4  -4   0   87.74    1.24 
  -4  -4   0   88.77    1.35 
  -4  -4   0   91.55    1.29 
   4   4   0   88.95    1.46 
   4   4   0   88.98    1.24 
   4   4   0   87.44    1.22 
   4   4   0   89.76    1.23 
   4   4   0   89.04    1.32 
   4   4   0   87.67    1.23 
  -5  -4   0   79.20    1.07 
  -5  -4   0   79.44    1.10 
  -5  -4   0   79.31    1.14 
  -5  -4   0   80.60    1.22 
  -5  -4   0   80.15    1.09 
  -5  -4   0   78.51    1.07 
   5   4   0   79.29    1.07 
   5   4   0   79.59    1.10 
   5   4   0   81.08    1.19 
   5   4   0   80.27    1.08 
   5   4   0   80.43    1.36 
   5   4   0   79.68    1.07 
   5   4   0   78.72    1.11 
   5   4   0   80.85    1.16 
  -6  -4   0   27.52    0.75 
  -6  -4   0   25.79    0.81 
  -6  -4   0   26.97    0.69 
  -6  -4   0   26.90    0.73 
  -6  -4   0   26.74    0.73 
   6   4   0   26.67    0.72 
   6   4   0   27.75    1.11 
   6   4   0   26.93    0.75 
   6   4   0   27.14    0.86 
   6   4   0   26.30    0.75 
   6   4   0   26.88    0.68 
   6   4   0   24.87    0.83 
  -7  -4   0   19.35    0.35 
  -7  -4   0   19.09    0.38 
  -7  -4   0   18.56    0.42 
   7   4   0   19.00    0.42 
   7   4   0   20.04    0.48 
   7   4   0   18.51    0.39 
   7   4   0   18.90    0.32 
   7   4   0   17.80    0.44 
   7   4   0   19.35    0.92 
   7   4   0   18.76    0.31 
  -8  -4   0   30.00    0.40 
  -8  -4   0   29.45    0.50 
  -8  -4   0   29.03    0.44 
   8   4   0   29.50    0.48 
   8   4   0   29.54    0.38 
   8   4   0   29.08    0.52 
   8   4   0   28.36    0.45 
  -9  -4   0    4.28    0.36 
  -9  -4   0    4.64    0.33 
  -9  -4   0    3.69    0.44 
   9   4   0    3.32    0.45 
   9   4   0    4.48    0.31 
   9   4   0    4.23    0.43 
   9   4   0    4.04    0.42 
 -10  -4   0   35.95    0.42 
 -10  -4   0   36.43    0.56 
 -10  -4   0   35.72    0.45 
  10   4   0   36.60    0.44 
  10   4   0   37.02    0.59 
  10   4   0   36.26    0.40 
  10   4   0   36.19    0.52 
 -11  -4   0    0.69    0.37 
 -11  -4   0    1.16    0.51 
  11   4   0    0.65    0.33 
  11   4   0    0.85    0.39 
  11   4   0    0.90    0.58 
  11   4   0    0.19    0.48 
 -12  -4   0    8.92    0.57 
 -12  -4   0    8.83    0.41 
  12   4   0    9.02    0.43 
  12   4   0    8.49    0.63 
  12   4   0    9.39    0.40 
  12   4   0    8.72    0.55 
 -13  -4   0    5.29    0.57 
 -13  -4   0    5.29    0.43 
  13   4   0    4.45    0.41 
  13   4   0    4.75    0.39 
  13   4   0    4.50    0.58 
  13   4   0    4.23    0.67 
 -14  -4   0    2.99    0.63 
 -14  -4   0    3.14    0.45 
  14   4   0    3.23    0.72 
  14   4   0    2.28    0.41 
  14   4   0    3.27    0.66 
 -15  -4   0   17.21    0.49 
  15   4   0   18.51    0.71 
 -16  -4   0    0.83    0.54 
  16   4   0    1.17    0.68 
 -17  -4   0    2.35    0.64 
  17   4   0    2.68    0.71 
  18   4   0    1.60    0.78 
  19   4   0    1.31    0.84 
  18  -5   0    4.25    0.93 
  17  -5   0    0.58    0.87 
  16  -5   0    1.02    0.77 
  16  -5   0    1.33    0.91 
 -16   5   0    1.38    0.75 
  15  -5   0    0.17    0.88 
  15  -5   0    1.21    0.77 
 -15   5   0    0.19    0.68 
  14  -5   0    2.91    0.74 
  14  -5   0    3.24    0.77 
 -14   5   0    3.80    0.72 
  13  -5   0    7.27    0.61 
  13  -5   0    7.17    0.52 
  13  -5   0    7.80    0.78 
 -13   5   0    7.26    0.40 
 -13   5   0    8.26    0.67 
  12  -5   0    4.62    0.80 
  12  -5   0    4.08    0.63 
  12  -5   0    4.78    0.47 
 -12   5   0    4.56    0.43 
 -12   5   0    6.12    0.65 
  11  -5   0   12.53    0.66 
  11  -5   0   12.11    0.56 
  11  -5   0   12.46    0.31 
  11  -5   0   12.89    0.40 
 -11   5   0   12.43    0.38 
 -11   5   0   13.36    0.54 
  10  -5   0    1.19    0.55 
  10  -5   0    1.34    0.37 
  10  -5   0    1.62    0.31 
  10  -5   0    1.84    0.61 
 -10   5   0    1.22    0.36 
 -10   5   0    3.09    0.56 
   9  -5   0   10.93    0.31 
   9  -5   0   10.86    0.55 
   9  -5   0   10.04    0.47 
   9  -5   0   10.59    0.33 
  -9   5   0   10.33    0.31 
  -9   5   0   11.83    0.48 
   8  -5   0    1.09    0.46 
   8  -5   0    1.21    0.28 
   8  -5   0    1.29    0.28 
   8  -5   0    0.50    0.39 
  -8   5   0    2.00    0.41 
  -8   5   0    0.67    0.12 
   7  -5   0    3.22    0.38 
   7  -5   0    2.96    0.42 
   7  -5   0    3.80    0.38 
   7  -5   0    2.39    0.47 
   7  -5   0    3.85    0.35 
  -7   5   0    2.71    0.42 
   6  -5   0    2.14    0.35 
   6  -5   0    3.07    0.22 
   6  -5   0    2.41    0.27 
   6  -5   0    2.22    0.30 
   6  -5   0    2.79    0.24 
  -6   5   0    3.11    0.32 
  -6   5   0    2.81    0.21 
   5  -5   0   93.53    1.06 
   5  -5   0   94.51    1.02 
   5  -5   0   95.90    1.00 
   5  -5   0   94.62    1.03 
  -5   5   0   94.84    0.99 
  -5   5   0   94.44    1.05 
  -5   5   0   93.53    0.97 
   4  -5   0   57.40    1.19 
   4  -5   0   57.73    1.14 
   4  -5   0   56.19    1.16 
   4  -5   0   55.54    1.19 
  -4   5   0   57.16    1.17 
  -4   5   0   55.48    1.17 
  -4   5   0   57.49    1.14 
  -4   5   0   56.27    1.12 
   3  -5   0    3.10    0.40 
   3  -5   0    2.41    0.29 
  -3   5   0    3.29    0.39 
   2  -5   0   22.91    0.40 
   2  -5   0   23.59    0.52 
  -2   5   0   23.48    0.51 
  -2   5   0   22.80    0.39 
   1  -5   0  125.15    1.46 
  -1   5   0  125.90    1.46 
   0  -5   0   -0.73    0.26 
   0   5   0   -0.13    0.27 
  -1  -5   0  315.72    4.49 
  -1  -5   0  316.31    4.53 
  -1  -5   0  311.41    4.44 
   1   5   0  309.68    4.48 
  -2  -5   0   49.36    0.69 
  -2  -5   0   49.36    0.68 
  -2  -5   0   48.30    0.68 
  -2  -5   0   49.12    0.98 
  -2  -5   0   50.10    0.73 
  -2  -5   0   50.28    0.86 
  -2  -5   0   48.77    0.74 
   2   5   0   48.47    0.74 
   2   5   0   48.78    0.80 
   2   5   0   49.83    0.73 
  -3  -5   0   15.39    0.20 
  -3  -5   0   14.97    0.30 
  -3  -5   0   15.88    0.31 
  -3  -5   0   15.67    0.24 
  -3  -5   0   15.71    0.28 
  -3  -5   0   15.31    0.25 
  -3  -5   0   15.27    0.32 
  -3  -5   0   15.79    0.72 
   3   5   0   15.46    0.21 
   3   5   0   15.59    0.67 
   3   5   0   15.63    0.27 
   3   5   0   16.09    0.21 
   3   5   0   15.64    0.30 
   3   5   0   15.50    0.28 
  -4  -5   0  129.48    2.12 
  -4  -5   0  128.05    2.33 
  -4  -5   0  129.42    2.13 
  -4  -5   0  131.04    2.15 
  -4  -5   0  129.91    2.22 
  -4  -5   0  134.65    2.19 
  -4  -5   0  128.35    2.16 
  -4  -5   0  129.33    2.13 
   4   5   0  130.59    2.12 
   4   5   0  129.02    2.16 
   4   5   0  131.20    2.20 
   4   5   0  128.03    2.12 
   4   5   0  129.89    2.12 
   4   5   0  128.15    2.32 
   4   5   0  128.64    2.14 
  -5  -5   0   61.63    1.00 
  -5  -5   0   61.27    1.00 
  -5  -5   0   61.32    0.98 
  -5  -5   0   61.79    0.99 
  -5  -5   0   61.92    1.05 
  -5  -5   0   62.50    1.13 
  -5  -5   0   61.41    1.05 
   5   5   0   62.75    1.04 
   5   5   0   61.10    1.05 
   5   5   0   61.33    0.97 
   5   5   0   60.59    0.99 
   5   5   0   61.88    1.28 
   5   5   0   61.05    1.03 
   5   5   0   63.21    1.11 
   5   5   0   60.76    0.98 
  -6  -5   0   10.67    0.32 
  -6  -5   0   11.22    0.39 
  -6  -5   0   10.82    0.31 
  -6  -5   0   11.59    0.36 
  -6  -5   0   11.25    0.40 
  -6  -5   0   10.40    0.27 
   6   5   0   10.35    0.34 
   6   5   0   10.37    0.26 
   6   5   0   11.49    0.40 
   6   5   0   11.63    0.85 
   6   5   0   11.03    0.34 
   6   5   0   10.95    0.30 
  -7  -5   0   18.86    0.49 
  -7  -5   0   19.57    0.56 
  -7  -5   0   19.45    0.68 
  -7  -5   0   18.35    0.58 
   7   5   0   18.55    0.51 
   7   5   0   19.19    0.70 
   7   5   0   21.50    1.10 
   7   5   0   18.68    0.57 
   7   5   0   19.09    0.47 
   7   5   0   19.38    0.73 
   7   5   0   19.08    0.58 
  -8  -5   0    2.52    0.34 
  -8  -5   0    2.56    0.30 
  -8  -5   0    1.88    0.39 
   8   5   0    2.15    0.37 
   8   5   0    1.73    0.36 
   8   5   0    2.24    0.27 
   8   5   0    2.46    0.98 
   8   5   0    2.11    0.25 
   8   5   0    3.05    0.32 
   8   5   0    1.55    0.40 
  -9  -5   0    1.06    0.34 
  -9  -5   0    0.71    0.30 
  -9  -5   0    1.19    0.44 
   9   5   0   -0.01    1.06 
   9   5   0    1.01    0.28 
   9   5   0    0.99    0.45 
   9   5   0    1.00    0.30 
   9   5   0    0.85    0.40 
 -10  -5   0   16.37    0.40 
 -10  -5   0   16.27    0.43 
 -10  -5   0   16.54    0.54 
  10   5   0   16.07    0.56 
  10   5   0   16.43    0.51 
  10   5   0   17.48    1.30 
  10   5   0   16.55    0.37 
  10   5   0   16.45    0.40 
 -11  -5   0   37.91    0.60 
 -11  -5   0   39.64    0.88 
  11   5   0   38.87    1.52 
  11   5   0   38.63    0.77 
  11   5   0   37.89    0.70 
  11   5   0   38.48    0.66 
  11   5   0   37.26    0.68 
 -12  -5   0   17.19    0.45 
 -12  -5   0   17.11    0.60 
  12   5   0   16.71    0.42 
  12   5   0   16.99    0.66 
  12   5   0   17.05    0.42 
  12   5   0   15.89    1.46 
  12   5   0   17.01    0.58 
 -13  -5   0    3.79    0.56 
 -13  -5   0    4.32    0.44 
  13   5   0    3.63    0.63 
  13   5   0    4.11    0.38 
  13   5   0    3.65    0.56 
  13   5   0    3.53    1.48 
 -14  -5   0    5.44    0.64 
 -14  -5   0    5.86    0.48 
  14   5   0    5.93    0.65 
  14   5   0    5.27    0.70 
  14   5   0    5.00    0.40 
  14   5   0    3.88    1.53 
 -15  -5   0    8.20    0.49 
  15   5   0    7.69    0.66 
  15   5   0    5.16    1.60 
 -16  -5   0    2.87    0.56 
  16   5   0    3.05    0.70 
  16   5   0    0.34    1.67 
 -17  -5   0    4.72    0.59 
  17   5   0    1.03    1.78 
  17   5   0    4.79    0.77 
  18   5   0    3.70    1.89 
  18   5   0    8.31    0.79 
  19   5   0    2.05    0.82 
  18  -6   0    2.66    0.96 
  17  -6   0    0.74    0.83 
  16  -6   0    0.81    0.75 
 -16   6   0    0.32    0.80 
  15  -6   0    0.54    0.75 
  15  -6   0   -0.68    0.79 
 -15   6   0    0.50    0.74 
  14  -6   0    0.25    0.74 
  14  -6   0    0.95    0.74 
 -14   6   0    0.37    0.69 
  13  -6   0   10.19    0.71 
  13  -6   0    9.87    0.66 
 -13   6   0   11.23    0.68 
  12  -6   0    1.25    0.68 
  12  -6   0    1.21    0.42 
  12  -6   0    0.81    0.64 
 -12   6   0    1.63    0.59 
 -12   6   0    0.72    0.41 
  11  -6   0    0.14    0.42 
  11  -6   0    0.60    0.38 
  11  -6   0   -0.24    0.61 
  11  -6   0    0.09    0.56 
 -11   6   0    0.47    0.36 
 -11   6   0    1.00    0.54 
  10  -6   0    0.33    0.35 
  10  -6   0   -1.00    0.53 
  10  -6   0   -0.13    0.57 
 -10   6   0    0.43    0.50 
   9  -6   0   20.90    0.58 
   9  -6   0   21.09    0.55 
  -9   6   0   22.20    0.54 
   8  -6   0   -0.85    0.45 
   8  -6   0   -0.48    0.41 
   8  -6   0   -0.09    0.28 
  -8   6   0    0.87    0.25 
  -8   6   0    0.00    0.39 
   7  -6   0   29.93    0.61 
   7  -6   0   27.53    0.69 
   7  -6   0   28.12    0.61 
   7  -6   0   27.87    0.73 
   7  -6   0   27.99    0.67 
  -7   6   0   29.24    0.72 
  -7   6   0   28.28    0.57 
   6  -6   0   51.04    0.79 
   6  -6   0   53.26    0.86 
   6  -6   0   51.38    0.75 
   6  -6   0   51.32    0.80 
  -6   6   0   50.95    0.73 
  -6   6   0   50.87    0.79 
  -6   6   0   52.37    0.82 
   5  -6   0    6.10    0.33 
   5  -6   0    5.86    0.35 
   5  -6   0    6.09    0.37 
   5  -6   0    6.65    0.27 
  -5   6   0    6.20    0.33 
  -5   6   0    6.27    0.21 
  -5   6   0    6.88    0.26 
   4  -6   0   15.07    0.41 
   4  -6   0   14.83    0.37 
  -4   6   0   13.74    0.27 
  -4   6   0   15.64    0.42 
   3  -6   0  244.61    2.75 
   3  -6   0  243.34    2.70 
   3  -6   0  242.48    2.69 
   3  -6   0  245.83    2.71 
  -3   6   0  245.58    2.74 
  -3   6   0  242.67    2.69 
   2  -6   0   18.11    0.22 
   2  -6   0   17.92    0.37 
  -2   6   0   18.53    0.36 
   1  -6   0   23.23    0.31 
  -1   6   0   23.58    0.30 
   0  -6   0  162.68    2.35 
   0   6   0  164.45    2.35 
  -1  -6   0  103.16    1.58 
  -1  -6   0  103.70    1.66 
  -1  -6   0  104.18    1.72 
   1   6   0  103.01    1.65 
  -2  -6   0   19.91    0.28 
  -2  -6   0   19.31    0.26 
  -2  -6   0   19.70    0.73 
  -2  -6   0   20.33    0.29 
  -2  -6   0   20.08    0.39 
  -2  -6   0   21.26    0.56 
   2   6   0   20.30    0.38 
   2   6   0   19.92    0.34 
  -3  -6   0   61.51    0.99 
  -3  -6   0   60.56    1.00 
  -3  -6   0   62.98    1.16 
  -3  -6   0   60.71    1.05 
  -3  -6   0   60.69    1.00 
  -3  -6   0   59.27    1.03 
  -3  -6   0   59.46    1.29 
   3   6   0   60.42    1.03 
   3   6   0   58.99    1.02 
   3   6   0   58.45    1.21 
   3   6   0   62.59    1.11 
   3   6   0   61.00    0.96 
  -4  -6   0    3.72    0.30 
  -4  -6   0    4.84    0.29 
  -4  -6   0    4.03    0.22 
  -4  -6   0    4.33    0.24 
  -4  -6   0    5.00    0.28 
  -4  -6   0    4.43    0.18 
  -4  -6   0    5.34    0.31 
   4   6   0    4.86    0.24 
   4   6   0    4.77    0.21 
   4   6   0    4.86    0.19 
   4   6   0    5.02    0.65 
   4   6   0    4.58    0.27 
   4   6   0    4.65    0.27 
  -5  -6   0   67.41    0.90 
  -5  -6   0   66.54    0.89 
  -5  -6   0   66.84    0.87 
  -5  -6   0   67.46    1.05 
  -5  -6   0   68.47    0.92 
  -5  -6   0   67.39    0.96 
  -5  -6   0   68.35    0.97 
   5   6   0   67.87    1.02 
   5   6   0   66.59    0.95 
   5   6   0   66.20    0.88 
   5   6   0   66.74    0.89 
   5   6   0   67.03    0.87 
   5   6   0   66.91    1.17 
  -6  -6   0   26.04    0.85 
  -6  -6   0   25.31    0.76 
  -6  -6   0   24.81    0.75 
  -6  -6   0   25.61    0.96 
  -6  -6   0   23.32    0.84 
  -6  -6   0   24.07    0.77 
  -6  -6   0   24.69    0.77 
   6   6   0   24.40    1.16 
   6   6   0   25.41    0.91 
   6   6   0   24.46    0.73 
   6   6   0   24.53    0.72 
   6   6   0   23.77    0.83 
   6   6   0   24.08    0.75 
  -7  -6   0   12.66    0.42 
  -7  -6   0   12.41    0.32 
  -7  -6   0   12.23    0.31 
  -7  -6   0   12.97    0.27 
  -7  -6   0   14.13    0.40 
   7   6   0   12.36    0.32 
   7   6   0   13.10    0.32 
   7   6   0   12.50    0.31 
   7   6   0   12.93    0.31 
   7   6   0   13.17    0.89 
   7   6   0   12.77    0.23 
   7   6   0   13.66    0.40 
  -8  -6   0   61.68    0.69 
  -8  -6   0   60.92    0.73 
  -8  -6   0   62.59    0.84 
   8   6   0   63.46    1.27 
   8   6   0   62.30    0.75 
   8   6   0   62.60    0.85 
   8   6   0   62.48    0.73 
   8   6   0   61.22    0.91 
   8   6   0   62.74    0.64 
   8   6   0   62.62    0.69 
  -9  -6   0    4.47    0.48 
  -9  -6   0    3.94    0.41 
  -9  -6   0    3.13    0.34 
   9   6   0    3.58    0.48 
   9   6   0    3.63    0.31 
   9   6   0    3.84    0.43 
   9   6   0    3.53    0.34 
   9   6   0    4.33    1.16 
 -10  -6   0   19.05    0.50 
 -10  -6   0   19.12    0.47 
 -10  -6   0   19.25    0.59 
  10   6   0   18.97    0.54 
  10   6   0   20.15    0.44 
  10   6   0   20.70    1.38 
  10   6   0   19.06    0.60 
  10   6   0   20.01    0.48 
 -11  -6   0   30.99    0.48 
 -11  -6   0   31.66    0.46 
 -11  -6   0   30.94    0.59 
  11   6   0   32.17    1.42 
  11   6   0   32.00    0.45 
  11   6   0   31.25    0.40 
  11   6   0   30.08    0.60 
  11   6   0   32.02    0.56 
 -12  -6   0    2.78    0.44 
 -12  -6   0    1.87    0.57 
  12   6   0    2.09    0.54 
  12   6   0    1.16    1.44 
  12   6   0    2.91    0.41 
  12   6   0    0.92    0.61 
 -13  -6   0    0.30    0.46 
 -13  -6   0    0.34    0.59 
  13   6   0   -0.09    0.61 
  13   6   0    0.61    0.36 
  13   6   0   -0.04    0.54 
  13   6   0   -0.24    1.49 
 -14  -6   0    0.91    0.45 
 -14  -6   0    1.85    0.78 
  14   6   0    0.83    0.59 
  14   6   0    0.04    1.55 
  14   6   0    1.13    0.47 
 -15  -6   0    0.04    0.46 
  15   6   0   -0.25    1.69 
  15   6   0    0.38    0.64 
 -16  -6   0    1.32    0.51 
  16   6   0    0.88    1.73 
  16   6   0    2.24    0.66 
  17   6   0    1.83    0.72 
  17   6   0    0.34    1.83 
  18   6   0   -0.70    1.89 
  18   6   0    2.25    0.78 
  17  -7   0    1.68    0.87 
  16  -7   0    3.06    0.76 
  15  -7   0    1.43    0.80 
  14  -7   0    0.40    0.80 
  14  -7   0   -0.32    0.72 
 -14   7   0   -0.03    0.69 
  13  -7   0   16.45    0.81 
  13  -7   0   17.43    0.84 
 -13   7   0   16.58    0.76 
  12  -7   0    7.17    0.67 
  12  -7   0    7.16    0.68 
  12  -7   0    7.16    0.60 
 -12   7   0    8.47    0.66 
 -12   7   0    6.40    0.30 
  11  -7   0    0.45    0.63 
  11  -7   0    2.02    0.41 
  11  -7   0    0.66    0.62 
 -11   7   0    1.77    0.59 
  10  -7   0    5.76    0.55 
  10  -7   0    5.36    0.53 
  10  -7   0    7.24    0.37 
 -10   7   0    6.51    0.51 
 -10   7   0    7.32    0.29 
   9  -7   0   -0.72    0.51 
   9  -7   0   -0.72    0.49 
   9  -7   0    0.14    0.33 
  -9   7   0   -0.33    0.30 
  -9   7   0   -0.13    0.45 
   8  -7   0    1.56    0.44 
   8  -7   0    2.67    0.30 
   8  -7   0    2.14    0.46 
  -8   7   0    2.83    0.41 
  -8   7   0    2.34    0.28 
   7  -7   0   36.59    0.40 
   7  -7   0   36.81    0.36 
   7  -7   0   35.91    0.48 
   7  -7   0   36.12    0.46 
  -7   7   0   36.57    0.34 
  -7   7   0   36.95    0.46 
   6  -7   0    6.09    0.35 
   6  -7   0    6.10    0.24 
   6  -7   0    6.23    0.34 
  -6   7   0    6.97    0.34 
  -6   7   0    6.26    0.22 
  -6   7   0    6.27    0.16 
   5  -7   0    3.28    0.21 
   5  -7   0    3.85    0.30 
   5  -7   0    3.73    0.30 
  -5   7   0    3.83    0.28 
  -5   7   0    3.02    0.20 
   4  -7   0  103.33    1.37 
   4  -7   0  102.39    1.35 
   4  -7   0  105.84    1.39 
  -4   7   0  104.23    1.42 
  -4   7   0  101.63    1.35 
   3  -7   0    0.90    0.15 
   3  -7   0    0.62    0.19 
  -3   7   0    1.40    0.32 
  -3   7   0    0.94    0.14 
  -2   7   0  113.97    1.57 
  -1   7   0   31.02    0.50 
   0   7   0  171.41    2.11 
  -1  -7   0   10.59    0.32 
   1   7   0   10.26    0.32 
  -2  -7   0    4.45    0.38 
  -2  -7   0    4.04    0.28 
  -2  -7   0    4.93    0.28 
  -2  -7   0    4.35    0.27 
   2   7   0    4.87    0.28 
   2   7   0    4.77    0.39 
   2   7   0    4.55    0.34 
  -3  -7   0    0.35    0.24 
  -3  -7   0   -0.16    0.20 
  -3  -7   0   -0.02    0.20 
  -3  -7   0   -0.11    0.16 
  -3  -7   0    0.06    0.29 
   3   7   0    0.02    0.21 
   3   7   0    0.06    0.23 
   3   7   0    0.04    0.28 
  -4  -7   0    1.75    0.37 
  -4  -7   0    0.77    0.25 
  -4  -7   0    1.04    0.26 
  -4  -7   0    1.91    0.30 
  -4  -7   0    1.43    0.35 
  -4  -7   0    1.01    0.21 
   4   7   0    0.94    0.32 
   4   7   0    0.98    0.67 
   4   7   0    1.60    0.29 
   4   7   0    1.08    0.19 
   4   7   0    1.18    0.21 
   4   7   0    0.96    0.28 
  -5  -7   0  295.99    3.05 
  -5  -7   0  288.21    3.11 
  -5  -7   0  289.47    3.00 
  -5  -7   0  285.12    3.07 
  -5  -7   0  295.38    3.02 
  -5  -7   0  289.82    3.02 
   5   7   0  293.20    3.24 
   5   7   0  295.02    3.04 
   5   7   0  290.28    3.10 
   5   7   0  288.49    3.02 
   5   7   0  291.99    3.00 
  -6  -7   0   43.44    0.85 
  -6  -7   0   41.79    0.50 
  -6  -7   0   42.92    0.51 
  -6  -7   0   43.08    0.63 
  -6  -7   0   41.38    0.54 
  -6  -7   0   43.57    0.54 
   6   7   0   42.71    0.73 
   6   7   0   42.70    0.51 
   6   7   0   42.82    0.99 
   6   7   0   41.67    0.52 
   6   7   0   42.41    0.52 
  -7  -7   0   76.71    1.18 
  -7  -7   0   74.94    0.91 
  -7  -7   0   76.96    0.99 
  -7  -7   0   75.67    1.12 
  -7  -7   0   76.91    0.89 
   7   7   0   76.38    0.87 
   7   7   0   76.26    0.88 
   7   7   0   77.07    0.98 
   7   7   0   76.69    1.36 
   7   7   0   75.74    1.05 
  -8  -7   0   32.96    0.49 
  -8  -7   0   31.95    0.55 
  -8  -7   0   34.39    0.72 
  -8  -7   0   32.68    0.65 
  -8  -7   0   33.14    0.58 
   8   7   0   33.31    0.53 
   8   7   0   35.61    1.25 
   8   7   0   33.61    0.61 
   8   7   0   33.87    0.55 
  -9  -7   0    7.40    0.40 
  -9  -7   0    8.45    0.55 
   9   7   0    7.77    0.55 
   9   7   0    7.77    0.48 
   9   7   0    9.80    1.25 
 -10  -7   0   11.26    0.48 
 -10  -7   0   10.53    0.41 
 -10  -7   0   10.78    0.36 
  10   7   0   10.99    0.51 
  10   7   0   11.53    1.20 
  10   7   0   10.82    0.43 
 -11  -7   0    1.82    0.52 
 -11  -7   0    1.47    0.38 
 -11  -7   0    1.16    0.41 
  11   7   0    1.46    0.54 
  11   7   0    1.36    0.47 
  11   7   0    0.97    1.34 
 -12  -7   0    0.09    0.41 
 -12  -7   0    0.46    0.56 
  12   7   0   -0.49    0.50 
  12   7   0   -0.34    1.41 
  12   7   0   -0.23    0.57 
 -13  -7   0    0.48    0.43 
 -13  -7   0    0.36    0.59 
  13   7   0    0.62    0.55 
  13   7   0   -0.25    0.61 
  13   7   0   -0.24    1.46 
 -14  -7   0   -0.11    0.45 
  14   7   0    0.08    0.58 
  14   7   0    0.62    1.57 
 -15  -7   0    1.64    0.50 
  15   7   0    2.18    0.64 
  15   7   0    2.49    1.67 
  16   7   0    2.34    1.70 
  16   7   0    3.91    0.67 
  17   7   0    1.32    0.72 
  17   7   0   -0.08    1.78 
  18   7   0    0.88    2.07 
  18   7   0    2.03    0.73 
  17  -8   0    0.81    0.97 
  16  -8   0    1.10    0.90 
  15  -8   0    0.82    0.80 
  14  -8   0    8.43    0.79 
 -14   8   0    8.79    0.81 
  13  -8   0    1.25    0.74 
  13  -8   0    1.22    0.73 
 -13   8   0    1.94    0.66 
  12  -8   0   -0.02    0.67 
  12  -8   0    0.64    0.69 
 -12   8   0    0.58    0.63 
  11  -8   0   -0.05    0.39 
  11  -8   0   -0.53    0.63 
  11  -8   0    0.16    0.67 
 -11   8   0    0.60    0.38 
 -11   8   0    2.07    0.65 
  10  -8   0    7.27    0.39 
  10  -8   0    6.09    0.59 
  10  -8   0    6.54    0.56 
 -10   8   0    6.34    0.35 
 -10   8   0    7.53    0.58 
   9  -8   0   69.37    0.81 
   9  -8   0   69.17    1.02 
   9  -8   0   67.16    0.93 
  -9   8   0   68.58    0.78 
  -9   8   0   70.80    0.90 
   8  -8   0    0.65    0.31 
   8  -8   0    0.14    0.48 
   8  -8   0   -0.08    0.46 
   8  -8   0    1.18    0.61 
  -8   8   0    0.22    0.28 
  -8   8   0    0.92    0.44 
   7  -8   0   34.59    0.70 
   7  -8   0   34.83    0.74 
   7  -8   0   35.17    0.61 
  -7   8   0   34.63    0.58 
  -7   8   0   35.80    0.70 
   6  -8   0    5.39    0.34 
   6  -8   0    5.73    0.25 
   6  -8   0    4.92    0.35 
  -6   8   0    5.35    0.23 
  -6   8   0    5.91    0.33 
   5  -8   0  125.57    1.30 
   5  -8   0  127.97    1.32 
   5  -8   0  126.25    1.27 
  -5   8   0  124.87    1.26 
  -5   8   0  122.51    1.28 
   4  -8   0   12.03    0.47 
   4  -8   0   12.07    0.43 
   4  -8   0   11.96    0.40 
  -4   8   0   11.49    0.51 
  -4   8   0   11.87    0.38 
  -3   8   0    2.27    0.34 
  -2   8   0    2.70    0.33 
  -1   8   0   52.97    0.95 
   0  -8   0   14.42    0.34 
   0   8   0   14.75    0.35 
  -1  -8   0   66.94    1.18 
   1   8   0   66.15    1.05 
  -2  -8   0   73.89    0.93 
  -2  -8   0   72.75    0.66 
  -2  -8   0   73.16    0.66 
   2   8   0   73.22    0.78 
  -3  -8   0   40.78    0.83 
  -3  -8   0   43.19    0.64 
  -3  -8   0   41.30    0.63 
  -3  -8   0   42.35    0.87 
  -3  -8   0   41.31    0.64 
  -3  -8   0   43.07    0.69 
   3   8   0   42.29    0.81 
   3   8   0   41.59    0.72 
   3   8   0   43.37    0.68 
  -4  -8   0   92.87    1.57 
  -4  -8   0   91.79    1.60 
  -4  -8   0   91.95    1.72 
  -4  -8   0   92.67    1.56 
  -4  -8   0   91.70    1.57 
  -4  -8   0   91.58    1.69 
   4   8   0   92.12    1.61 
   4   8   0   91.85    1.59 
   4   8   0   93.48    1.68 
  -5  -8   0    3.06    0.34 
  -5  -8   0    3.06    0.37 
  -5  -8   0    3.33    0.29 
  -5  -8   0    2.87    0.28 
  -5  -8   0    3.23    0.23 
  -5  -8   0    3.60    0.33 
   5   8   0    2.46    0.71 
   5   8   0    2.92    0.28 
   5   8   0    3.16    0.20 
   5   8   0    2.98    0.30 
   5   8   0    3.53    0.22 
   5   8   0    3.05    0.32 
  -6  -8   0  106.15    1.28 
  -6  -8   0  106.31    1.42 
  -6  -8   0  105.29    1.35 
  -6  -8   0  105.63    1.30 
  -6  -8   0  103.96    1.30 
  -6  -8   0  105.33    1.50 
   6   8   0  103.87    1.26 
   6   8   0  104.41    1.62 
   6   8   0  104.21    1.34 
   6   8   0  105.58    1.31 
   6   8   0  105.02    1.42 
  -7  -8   0   34.23    0.60 
  -7  -8   0   34.62    0.55 
  -7  -8   0   34.30    0.65 
  -7  -8   0   37.09    0.71 
  -7  -8   0   35.36    0.59 
   7   8   0   35.33    0.56 
   7   8   0   35.32    0.69 
   7   8   0   34.96    0.58 
   7   8   0   34.27    0.76 
   7   8   0   37.55    1.18 
  -8  -8   0    1.18    0.37 
  -8  -8   0    2.74    0.53 
  -8  -8   0    1.54    0.42 
  -8  -8   0    1.83    0.30 
   8   8   0    1.97    0.34 
   8   8   0    1.66    1.01 
   8   8   0    1.18    0.34 
  -9  -8   0   37.16    0.45 
  -9  -8   0   37.97    0.58 
   9   8   0   36.82    0.59 
   9   8   0   38.31    0.54 
   9   8   0   37.87    1.24 
 -10  -8   0    3.62    0.52 
 -10  -8   0    3.58    0.36 
  10   8   0    3.48    0.43 
  10   8   0    3.29    1.22 
  10   8   0    3.72    0.52 
 -11  -8   0   55.05    0.74 
 -11  -8   0   56.43    0.72 
 -11  -8   0   54.44    0.68 
  11   8   0   54.87    0.75 
  11   8   0   55.97    0.76 
  11   8   0   56.10    1.58 
 -12  -8   0    1.12    0.56 
 -12  -8   0    0.53    0.43 
  12   8   0    0.54    0.50 
  12   8   0    0.39    1.40 
  12   8   0    0.71    0.57 
 -13  -8   0    1.50    0.45 
 -13  -8   0    2.64    0.62 
  13   8   0    1.63    0.54 
  13   8   0    1.65    1.45 
 -14  -8   0    3.82    0.44 
  14   8   0    3.57    1.51 
  14   8   0    4.95    0.60 
  15   8   0    1.86    1.73 
  15   8   0    2.09    0.62 
  16   8   0   13.35    1.73 
  16   8   0   13.87    0.70 
  17   8   0    2.16    0.74 
  17   8   0    0.17    1.97 
  18   8   0    1.15    1.83 
  18   8   0    3.10    0.73 
  17  -9   0    2.64    0.97 
  16  -9   0    2.03    0.93 
  15  -9   0    9.15    0.88 
  14  -9   0    1.83    0.78 
  13  -9   0    4.52    0.73 
 -13   9   0    5.11    0.69 
  12  -9   0    5.81    0.69 
  12  -9   0    5.84    0.72 
 -12   9   0    6.08    0.61 
  11  -9   0    2.19    0.62 
  11  -9   0    1.84    0.62 
 -11   9   0    2.54    0.60 
 -11   9   0    2.25    0.40 
  10  -9   0    4.28    0.61 
  10  -9   0    3.86    0.66 
 -10   9   0    4.67    0.55 
 -10   9   0    4.36    0.39 
   9  -9   0    6.40    0.67 
   9  -9   0    8.72    0.63 
   9  -9   0    6.93    0.72 
  -9   9   0    7.12    0.62 
  -9   9   0    7.55    0.50 
   8  -9   0   20.89    0.59 
   8  -9   0   21.02    0.60 
   8  -9   0   22.08    0.44 
   8  -9   0   21.73    0.49 
  -8   9   0   21.90    0.56 
  -8   9   0   21.73    0.42 
   7  -9   0   15.14    0.52 
   7  -9   0   15.88    0.41 
   7  -9   0   15.51    0.56 
  -7   9   0   15.86    0.39 
  -7   9   0   16.06    0.49 
   6  -9   0   16.86    0.46 
   6  -9   0   16.40    0.43 
  -6   9   0   17.14    0.41 
  -6   9   0   18.05    0.40 
   5  -9   0    2.55    0.29 
   5  -9   0    1.93    0.32 
   5  -9   0    2.37    0.22 
  -5   9   0    2.08    0.21 
  -5   9   0    2.05    0.06 
   4  -9   0    1.39    0.31 
  -4   9   0    2.20    0.24 
  -4   9   0    1.96    0.45 
  -3   9   0   11.05    0.41 
  -2   9   0   84.82    0.94 
  -1   9   0   14.05    0.54 
   0  -9   0    4.17    0.42 
   0   9   0    3.74    0.40 
  -1  -9   0  128.85    1.22 
   1   9   0  129.76    1.11 
  -2  -9   0   16.82    0.81 
  -2  -9   0   17.18    0.44 
   2   9   0   16.62    0.58 
  -3  -9   0    1.10    0.17 
  -3  -9   0    1.45    0.26 
  -3  -9   0    1.35    0.36 
  -3  -9   0    1.26    0.22 
  -3  -9   0    0.86    0.22 
  -3  -9   0    1.34    0.37 
   3   9   0    0.84    0.32 
   3   9   0    1.70    0.24 
   3   9   0    1.44    0.26 
  -4  -9   0    3.33    0.31 
  -4  -9   0    3.90    0.23 
  -4  -9   0    4.16    0.43 
  -4  -9   0    3.31    0.26 
  -4  -9   0    3.28    0.27 
  -4  -9   0    3.27    0.39 
   4   9   0    2.64    0.28 
   4   9   0    3.16    0.30 
   4   9   0    3.07    0.36 
  -5  -9   0   33.43    0.30 
  -5  -9   0   34.26    0.37 
  -5  -9   0   33.29    0.47 
  -5  -9   0   32.88    0.39 
  -5  -9   0   32.84    0.47 
  -5  -9   0   32.35    0.36 
   5   9   0   33.01    0.39 
   5   9   0   33.85    0.44 
   5   9   0   32.69    0.37 
   5   9   0   32.79    0.24 
   5   9   0   33.00    0.24 
  -6  -9   0   33.28    0.34 
  -6  -9   0   33.56    0.40 
  -6  -9   0   32.96    0.52 
  -6  -9   0   32.54    0.40 
  -6  -9   0   33.21    0.52 
  -6  -9   0   32.11    0.42 
   6   9   0   32.95    0.44 
   6   9   0   31.94    0.41 
   6   9   0   32.97    0.93 
   6   9   0   33.19    0.32 
   6   9   0   33.26    0.45 
  -7  -9   0    7.12    0.36 
  -7  -9   0    7.69    0.44 
  -7  -9   0    8.34    0.43 
  -7  -9   0    8.12    0.29 
  -7  -9   0    8.82    0.51 
   7   9   0    8.29    0.31 
   7   9   0    8.58    0.39 
   7   9   0    8.95    0.98 
   7   9   0    8.02    0.41 
  -8  -9   0    0.32    0.31 
  -8  -9   0    1.87    0.58 
  -8  -9   0    0.60    0.45 
   8   9   0    0.48    0.36 
   8   9   0    0.90    0.39 
   8   9   0    0.54    0.99 
   8   9   0   -0.29    0.44 
  -9  -9   0   76.48    0.67 
  -9  -9   0   77.49    0.69 
  -9  -9   0   74.74    0.63 
  -9  -9   0   76.54    0.77 
   9   9   0   78.32    1.35 
   9   9   0   75.89    0.67 
   9   9   0   77.03    0.63 
 -10  -9   0    3.38    0.48 
 -10  -9   0    3.75    0.36 
  10   9   0    2.92    1.21 
  10   9   0    4.30    0.55 
  10   9   0    4.13    0.46 
 -11  -9   0   30.90    0.68 
 -11  -9   0   32.92    0.69 
 -11  -9   0   30.64    0.74 
  11   9   0   31.96    0.68 
  11   9   0   32.63    1.53 
  11   9   0   31.15    0.72 
 -12  -9   0    3.93    0.57 
 -12  -9   0    3.67    0.47 
 -12  -9   0    3.64    0.45 
  12   9   0    3.79    0.51 
  12   9   0    5.86    1.43 
  12   9   0    3.44    0.57 
 -13  -9   0    0.17    0.45 
  13   9   0    0.13    0.53 
  13   9   0    0.44    1.43 
  14   9   0    1.47    1.55 
  14   9   0    0.56    0.55 
  15   9   0    1.42    1.67 
  15   9   0    0.24    0.62 
  16   9   0    1.05    0.66 
  16   9   0    1.44    1.79 
  17   9   0   -0.17    1.79 
  17   9   0    0.81    0.69 
  18   9   0    1.02    1.90 
  18   9   0    0.89    0.80 
  16 -10   0    3.26    0.99 
  15 -10   0    1.26    0.87 
  14 -10   0    5.17    0.87 
  13 -10   0    6.84    0.85 
  12 -10   0   14.60    0.84 
 -12  10   0   14.88    0.74 
  11 -10   0    2.68    0.63 
  11 -10   0    3.46    0.71 
 -11  10   0    3.10    0.59 
  10 -10   0    2.67    0.60 
  10 -10   0    2.17    0.63 
 -10  10   0    3.43    0.59 
 -10  10   0    2.05    0.38 
   9 -10   0    2.20    0.61 
   9 -10   0    2.59    0.56 
  -9  10   0    2.21    0.36 
  -9  10   0    2.89    0.48 
   8 -10   0    5.44    0.41 
   8 -10   0    5.81    0.51 
   8 -10   0    4.48    0.55 
  -8  10   0    5.10    0.34 
  -8  10   0    5.65    0.47 
   7 -10   0    0.46    0.43 
   7 -10   0    0.18    0.47 
  -7  10   0    0.12    0.29 
  -7  10   0    0.67    0.40 
   6 -10   0   11.10    0.34 
   6 -10   0   10.66    0.42 
  -6  10   0   11.11    0.26 
  -6  10   0   11.57    0.16 
   5 -10   0   -0.02    0.36 
  -5  10   0   -0.14    0.22 
   4 -10   0   56.49    0.57 
  -3  10   0   15.90    0.44 
  -2  10   0    0.77    0.39 
  -1  10   0    3.34    0.37 
   0 -10   0   25.29    0.38 
   0  10   0   25.76    0.39 
  -1 -10   0   24.48    0.44 
   1  10   0   25.44    0.45 
  -2 -10   0    2.34    0.37 
   2  10   0    2.45    0.38 
  -3 -10   0   -0.41    0.23 
  -3 -10   0    0.42    0.24 
  -3 -10   0    0.66    0.44 
  -3 -10   0    0.55    0.41 
  -3 -10   0    0.36    0.18 
  -3 -10   0    0.58    0.28 
   3  10   0    0.33    0.37 
   3  10   0    0.14    0.25 
  -4 -10   0    2.12    0.41 
  -4 -10   0    2.26    0.30 
  -4 -10   0    2.13    0.26 
  -4 -10   0    2.28    0.26 
  -4 -10   0    1.92    0.41 
  -4 -10   0    2.28    0.21 
   4  10   0    1.52    0.37 
   4  10   0    2.10    0.29 
   4  10   0    2.05    0.28 
  -5 -10   0   52.02    0.66 
  -5 -10   0   53.75    0.53 
  -5 -10   0   53.58    0.56 
  -5 -10   0   53.90    0.82 
  -5 -10   0   51.96    0.57 
  -5 -10   0   52.20    0.62 
   5  10   0   51.00    0.76 
   5  10   0   53.02    0.65 
   5  10   0   51.92    0.61 
  -6 -10   0    0.59    0.36 
  -6 -10   0    0.11    0.26 
  -6 -10   0    0.06    0.45 
  -6 -10   0    0.03    0.46 
  -6 -10   0    0.02    0.33 
  -6 -10   0    0.20    0.38 
   6  10   0    0.44    0.22 
   6  10   0    0.01    0.40 
   6  10   0   -0.02    0.36 
  -7 -10   0    1.04    0.41 
  -7 -10   0    1.33    0.29 
  -7 -10   0    1.03    0.47 
  -7 -10   0    2.70    0.56 
  -7 -10   0    1.13    0.37 
   7  10   0    1.34    0.29 
   7  10   0    1.38    0.40 
   7  10   0    1.37    0.96 
   7  10   0    1.34    0.41 
  -8 -10   0    1.46    0.45 
  -8 -10   0    0.55    0.38 
  -8 -10   0    1.33    0.31 
  -8 -10   0    0.87    0.49 
  -8 -10   0    1.84    0.58 
   8  10   0    0.93    1.00 
   8  10   0    1.15    0.33 
   8  10   0    0.85    0.43 
   8  10   0    0.88    0.40 
  -9 -10   0   24.62    0.48 
  -9 -10   0   26.88    0.42 
  -9 -10   0   25.87    0.67 
  -9 -10   0   25.48    0.53 
   9  10   0   25.88    0.43 
   9  10   0   25.20    0.52 
   9  10   0   25.67    1.16 
 -10 -10   0    0.80    0.50 
 -10 -10   0    1.36    0.56 
 -10 -10   0    2.18    0.42 
  10  10   0    1.41    1.23 
  10  10   0    1.92    0.47 
  10  10   0    2.13    0.56 
 -11 -10   0    2.59    0.54 
 -11 -10   0    2.70    0.40 
 -11 -10   0    2.45    0.47 
  11  10   0    2.61    1.28 
  11  10   0    3.13    0.48 
  11  10   0    2.68    0.55 
 -12 -10   0   -0.06    0.58 
 -12 -10   0   -0.05    0.45 
 -12 -10   0    0.38    0.43 
  12  10   0    0.98    1.31 
  12  10   0   -0.26    0.71 
  12  10   0    0.46    0.51 
  13  10   0    3.54    1.45 
  13  10   0    1.86    0.52 
  14  10   0   -0.27    0.53 
  14  10   0    1.69    1.51 
  15  10   0   -0.02    0.59 
  15  10   0    1.37    1.58 
  16  10   0    2.77    1.66 
  16  10   0    1.45    0.66 
  17  10   0    4.22    1.77 
  16 -11   0    1.39    0.97 
  15 -11   0   17.54    1.02 
  14 -11   0    2.91    1.05 
  13 -11   0    2.84    0.79 
  12 -11   0    1.56    0.75 
  11 -11   0    6.95    0.70 
  10 -11   0    1.37    0.58 
  10 -11   0    1.59    0.65 
 -10  11   0    1.81    0.40 
 -10  11   0    2.19    0.54 
   9 -11   0    1.50    0.50 
   9 -11   0    0.69    0.63 
  -9  11   0    0.58    0.35 
  -9  11   0    1.02    0.46 
   8 -11   0    6.06    0.53 
   8 -11   0    6.52    0.44 
  -8  11   0    6.67    0.32 
  -8  11   0    6.79    0.41 
   7 -11   0    8.71    0.49 
   7 -11   0    8.88    0.38 
  -7  11   0    9.47    0.29 
  -7  11   0    8.83    0.29 
   6 -11   0   15.69    0.47 
  -6  11   0   15.53    0.28 
   5 -11   0   18.10    0.41 
  -5  11   0   18.05    0.24 
   4 -11   0   25.39    0.35 
  -3  11   0   20.53    0.48 
  -2  11   0   -0.31    0.42 
  -1  11   0    0.80    0.42 
   0 -11   0   26.75    0.44 
   0  11   0   26.52    0.42 
  -1 -11   0   26.07    0.48 
   1  11   0   27.09    0.48 
  -2 -11   0   -0.56    0.42 
   2  11   0    0.09    0.41 
  -3 -11   0    2.78    0.47 
  -3 -11   0    3.21    0.21 
  -3 -11   0    3.08    0.47 
  -3 -11   0    3.61    0.27 
   3  11   0    3.66    0.46 
  -4 -11   0    0.52    0.23 
  -4 -11   0    0.70    0.47 
  -4 -11   0    0.33    0.45 
  -4 -11   0    0.72    0.34 
  -4 -11   0    0.35    0.29 
  -4 -11   0    1.01    0.31 
   4  11   0    0.75    0.30 
   4  11   0    0.09    0.43 
  -5 -11   0    1.83    0.33 
  -5 -11   0    0.97    0.34 
  -5 -11   0    1.82    0.50 
  -5 -11   0    1.70    0.25 
  -5 -11   0    1.83    0.51 
   5  11   0    1.40    0.43 
   5  11   0    1.46    0.33 
  -6 -11   0   18.99    0.41 
  -6 -11   0   19.47    0.58 
  -6 -11   0   17.68    0.41 
  -6 -11   0   18.39    0.54 
  -6 -11   0   18.45    0.31 
  -6 -11   0   18.10    0.39 
   6  11   0   17.50    0.39 
   6  11   0   18.29    0.48 
  -7 -11   0    0.93    0.29 
  -7 -11   0    0.60    0.40 
  -7 -11   0    0.85    0.50 
  -7 -11   0    2.13    0.60 
  -7 -11   0    0.68    0.37 
   7  11   0    0.47    0.41 
   7  11   0    0.58    0.40 
   7  11   0    1.15    0.25 
  -8 -11   0    5.54    0.61 
  -8 -11   0    4.35    0.39 
  -8 -11   0    4.15    0.51 
  -8 -11   0    4.82    0.45 
  -8 -11   0    4.70    0.32 
   8  11   0    4.98    1.00 
   8  11   0    4.77    0.42 
   8  11   0    4.76    0.31 
  -9 -11   0   61.31    0.84 
  -9 -11   0   59.30    0.68 
  -9 -11   0   59.43    0.85 
  -9 -11   0   61.32    0.73 
   9  11   0   61.89    0.66 
   9  11   0   60.69    1.35 
   9  11   0   61.37    0.84 
 -10 -11   0    1.30    0.40 
 -10 -11   0    0.89    0.71 
 -10 -11   0    0.97    0.53 
 -10 -11   0    0.49    0.47 
  10  11   0    1.12    0.52 
  10  11   0    1.33    1.19 
  10  11   0    1.59    0.43 
 -11 -11   0    3.07    0.55 
 -11 -11   0    3.40    0.47 
 -11 -11   0    3.44    0.43 
  11  11   0    3.02    0.54 
  11  11   0    4.20    1.27 
  11  11   0    3.04    0.45 
 -12 -11   0    5.18    0.48 
  12  11   0    5.30    0.51 
  12  11   0    7.21    1.35 
  13  11   0    7.30    0.54 
  13  11   0    8.16    1.40 
  14  11   0    1.64    1.49 
  14  11   0    0.46    0.73 
  15  11   0    1.64    1.62 
  16  11   0    3.30    1.70 
  17  11   0    2.17    1.74 
  15 -12   0    2.28    1.00 
  14 -12   0    1.35    0.92 
  13 -12   0    0.84    0.92 
  12 -12   0    0.56    0.82 
  11 -12   0    2.43    0.72 
  10 -12   0   -0.17    0.69 
   9 -12   0    0.06    0.52 
   9 -12   0   -0.52    0.63 
  -9  12   0   -0.19    0.36 
  -9  12   0   -0.08    0.47 
   8 -12   0   -0.93    0.54 
   8 -12   0   -0.04    0.46 
  -8  12   0   -0.65    0.32 
  -8  12   0   -0.42    0.36 
   7 -12   0   -0.54    0.51 
  -7  12   0   -0.16    0.30 
  -7  12   0   -0.42    0.21 
   6 -12   0   26.09    0.52 
   5 -12   0    7.49    0.40 
  -2  12   0   -0.04    0.45 
  -1  12   0   58.83    0.83 
   0 -12   0   -0.17    0.47 
   0  12   0    0.60    0.44 
  -1 -12   0   38.00    1.08 
   1  12   0   37.52    0.80 
  -2 -12   0    0.20    0.48 
   2  12   0    0.43    0.45 
  -3 -12   0   10.38    0.60 
  -3 -12   0   10.33    0.37 
  -3 -12   0   10.77    0.31 
   3  12   0   11.13    0.57 
  -4 -12   0    0.79    0.33 
  -4 -12   0    1.44    0.53 
  -4 -12   0    0.75    0.30 
  -4 -12   0    1.05    0.23 
  -4 -12   0    1.29    0.32 
   4  12   0    0.30    0.30 
   4  12   0    1.01    0.44 
  -5 -12   0   -0.49    0.34 
  -5 -12   0    0.44    0.34 
  -5 -12   0    0.22    0.26 
  -5 -12   0    0.00    0.52 
  -5 -12   0    0.05    0.36 
   5  12   0   -0.10    0.32 
   5  12   0   -0.12    0.45 
  -6 -12   0    7.53    0.29 
  -6 -12   0    8.59    0.40 
  -6 -12   0    7.50    0.40 
  -6 -12   0    7.74    0.56 
  -6 -12   0    7.77    0.38 
   6  12   0    7.83    0.48 
   6  12   0    7.77    0.37 
  -7 -12   0    3.85    0.41 
  -7 -12   0    4.28    0.31 
  -7 -12   0    3.91    0.39 
  -7 -12   0    4.37    0.61 
  -7 -12   0    3.79    0.76 
   7  12   0    3.98    0.39 
   7  12   0    3.71    0.44 
  -8 -12   0    4.13    0.65 
  -8 -12   0    5.03    0.34 
  -8 -12   0    4.39    0.45 
  -8 -12   0    4.59    0.42 
  -8 -12   0    5.30    0.66 
   8  12   0    5.04    0.28 
   8  12   0    4.67    0.44 
  -9 -12   0    5.72    0.39 
  -9 -12   0    5.10    0.50 
  -9 -12   0    4.42    0.73 
  -9 -12   0    5.46    0.52 
  -9 -12   0    5.20    0.72 
   9  12   0    5.59    1.12 
   9  12   0    5.62    0.52 
   9  12   0    5.95    0.38 
 -10 -12   0   -0.27    0.52 
 -10 -12   0   -0.44    0.73 
 -10 -12   0   -0.20    0.47 
  10  12   0    0.76    1.15 
  10  12   0    0.46    0.39 
  10  12   0    0.32    0.51 
 -11 -12   0    4.66    0.57 
 -11 -12   0    5.43    0.51 
  11  12   0    6.42    1.23 
  11  12   0    5.02    0.61 
  11  12   0    5.70    0.58 
 -12 -12   0   -0.01    0.49 
  12  12   0    1.16    1.30 
  13  12   0    7.93    1.40 
  14  12   0    3.51    1.53 
  15  12   0    2.12    1.56 
  16  12   0    5.27    1.72 
  14 -13   0    1.24    0.97 
  13 -13   0    1.84    0.95 
  12 -13   0    2.28    0.86 
  11 -13   0    5.01    0.73 
  10 -13   0    4.05    0.72 
   9 -13   0    9.37    0.71 
  -9  13   0    9.05    0.39 
   8 -13   0    1.06    0.48 
   8 -13   0    1.41    0.63 
  -8  13   0    0.42    0.20 
  -8  13   0    1.06    0.32 
   7 -13   0    0.82    0.59 
  -7  13   0    0.28    0.28 
   6 -13   0    2.67    0.52 
   5 -13   0    3.00    0.44 
   1 -13   0   -0.24    0.49 
  -1  13   0    0.17    0.47 
   0 -13   0    8.22    0.55 
   0  13   0    8.94    0.55 
  -1 -13   0    2.86    0.52 
   1  13   0    2.76    0.49 
  -2 -13   0   39.09    0.67 
   2  13   0   40.35    0.65 
  -3 -13   0    2.58    0.52 
   3  13   0    3.32    0.47 
  -4 -13   0    7.15    0.33 
  -4 -13   0    6.44    0.30 
  -4 -13   0    7.00    0.55 
  -4 -13   0    6.94    0.24 
   4  13   0    6.99    0.46 
  -5 -13   0    7.21    0.36 
  -5 -13   0    6.68    0.37 
  -5 -13   0    6.93    0.27 
  -5 -13   0    7.65    0.36 
  -5 -13   0    7.40    0.59 
   5  13   0    6.91    0.47 
   5  13   0    6.75    0.35 
  -6 -13   0    3.81    0.58 
  -6 -13   0    4.47    0.40 
  -6 -13   0    3.85    0.37 
  -6 -13   0    3.81    0.29 
  -6 -13   0    3.50    0.41 
   6  13   0    4.16    0.47 
   6  13   0    4.03    0.37 
  -7 -13   0    1.41    0.33 
  -7 -13   0    1.22    0.44 
  -7 -13   0    2.30    0.70 
  -7 -13   0    1.65    0.40 
   7  13   0    1.08    0.39 
  -8 -13   0    0.07    0.35 
  -8 -13   0    0.34    0.47 
  -8 -13   0    0.39    0.71 
  -8 -13   0    0.15    0.45 
   8  13   0    0.05    0.43 
  -9 -13   0   -0.18    0.73 
  -9 -13   0    1.43    0.47 
  -9 -13   0    0.69    0.49 
   9  13   0    1.09    0.47 
 -10 -13   0    0.56    0.73 
 -10 -13   0    2.09    0.51 
 -10 -13   0    2.01    0.53 
  10  13   0    2.27    0.51 
 -11 -13   0    0.83    0.49 
  11  13   0    2.36    1.19 
 -12 -13   0    1.05    0.53 
  12  13   0    2.21    1.29 
  13  13   0    4.82    1.51 
  14  13   0    3.63    1.50 
  15  13   0    5.01    1.61 
  16  13   0    7.90    1.75 
  13 -14   0    2.08    1.00 
  12 -14   0    1.28    0.86 
  11 -14   0    1.85    0.87 
  10 -14   0    1.09    0.74 
   9 -14   0    2.87    0.74 
  -9  14   0    2.04    0.42 
   8 -14   0    6.95    0.66 
  -8  14   0    6.43    0.33 
   7 -14   0    4.06    0.63 
   6 -14   0    2.32    0.54 
   5 -14   0    1.57    0.46 
   1 -14   0    8.65    0.52 
   0 -14   0    1.14    0.49 
   0  14   0    0.98    0.48 
  -1 -14   0   11.66    0.58 
   1  14   0   11.67    0.55 
  -2 -14   0   16.25    0.60 
   2  14   0   17.15    0.55 
  -3 -14   0   59.81    0.75 
   3  14   0   61.55    0.71 
  -4 -14   0    3.12    0.24 
  -4 -14   0    2.67    0.31 
  -4 -14   0    2.63    0.58 
  -4 -14   0    3.61    0.41 
   4  14   0    3.18    0.50 
  -5 -14   0    0.12    0.61 
  -5 -14   0    0.29    0.36 
  -5 -14   0    0.26    0.28 
   5  14   0    0.04    0.49 
   5  14   0    0.22    0.35 
  -6 -14   0    3.19    0.42 
  -6 -14   0    3.55    0.32 
  -6 -14   0    3.40    0.64 
  -6 -14   0    3.33    0.39 
   6  14   0    3.15    0.38 
  -7 -14   0   -0.34    0.45 
  -7 -14   0    0.58    0.34 
  -7 -14   0    0.27    0.42 
  -7 -14   0   -0.19    0.73 
   7  14   0   -0.53    0.42 
  -8 -14   0    0.35    0.45 
  -8 -14   0   -1.02    0.73 
  -8 -14   0   -0.21    0.46 
   8  14   0    0.36    0.43 
  -9 -14   0    2.94    0.52 
  -9 -14   0    1.64    0.77 
  -9 -14   0    3.40    0.51 
   9  14   0    3.21    0.53 
 -10 -14   0    0.16    0.57 
 -10 -14   0   -0.08    0.49 
  10  14   0    0.15    0.63 
 -11 -14   0    3.42    0.83 
 -11 -14   0    6.48    0.54 
  13  14   0    6.91    1.42 
  14  14   0    7.85    1.58 
  15  14   0    3.94    1.61 
  13 -15   0    2.40    1.05 
  12 -15   0    2.95    0.94 
  11 -15   0    5.62    0.95 
  10 -15   0    2.34    0.81 
   9 -15   0   10.42    0.86 
   8 -15   0    6.03    0.69 
   7 -15   0    6.33    0.62 
   6 -15   0    1.38    0.57 
   5 -15   0    5.92    0.49 
   2 -15   0    3.70    0.56 
   1 -15   0    0.74    0.57 
   0 -15   0   15.21    0.60 
  -1 -15   0    1.03    0.58 
  -2 -15   0    1.84    0.60 
  -3 -15   0    3.09    0.62 
  -4 -15   0    8.79    0.35 
  -4 -15   0    8.66    0.64 
  -4 -15   0    9.29    0.24 
  -5 -15   0    2.34    0.30 
  -5 -15   0    1.81    0.68 
  -5 -15   0    1.80    0.39 
  -6 -15   0    0.16    0.34 
  -6 -15   0   -0.62    0.68 
  -6 -15   0    0.09    0.40 
   6  15   0    0.06    0.38 
  -7 -15   0    0.59    0.43 
  -7 -15   0   -0.76    0.45 
   7  15   0    0.04    0.41 
  -8 -15   0    0.41    0.45 
  -8 -15   0   -0.29    0.47 
   8  15   0   -0.06    0.46 
  -9 -15   0    0.47    0.50 
  -9 -15   0    0.67    0.50 
   9  15   0    0.55    0.46 
 -10 -15   0    6.51    0.55 
 -11 -15   0    0.68    0.52 
  12 -16   0    2.67    0.98 
  10 -16   0    4.02    0.86 
   9 -16   0    2.95    0.80 
   8 -16   0    4.59    0.74 
   7 -16   0    3.10    0.63 
   6 -16   0    1.02    0.56 
   2 -16   0    1.44    0.57 
   1 -16   0    4.04    0.59 
   0 -16   0    9.26    0.61 
  -1 -16   0    0.21    0.59 
  -2 -16   0    1.14    0.64 
  -3 -16   0    0.15    0.64 
  -4 -16   0    6.74    0.37 
  -4 -16   0    6.35    0.69 
  -5 -16   0    1.46    0.40 
  -5 -16   0    0.83    0.69 
  -6 -16   0    0.52    0.41 
  -6 -16   0   -0.84    0.70 
   6  16   0    0.92    0.43 
  -7 -16   0    0.12    0.45 
   7  16   0    0.33    0.45 
  -8 -16   0    2.04    0.46 
  -8 -16   0    2.05    0.49 
   8  16   0    2.49    0.46 
  -9 -16   0   -1.01    0.51 
  -9 -16   0    0.14    0.51 
   9  16   0    0.23    0.54 
 -10 -16   0   -0.06    0.51 
  10 -17   0    2.28    0.87 
   9 -17   0    2.04    0.75 
   8 -17   0    3.25    0.77 
   7 -17   0    3.32    0.66 
   6 -17   0    0.73    0.59 
   3 -17   0    2.59    0.60 
   2 -17   0    1.28    0.58 
   1 -17   0    0.41    0.59 
   0 -17   0    0.75    0.60 
  -1 -17   0   11.27    0.62 
  -2 -17   0    2.21    0.66 
  -3 -17   0    7.07    0.70 
  -4 -17   0    6.41    0.36 
  -4 -17   0    5.64    0.67 
  -5 -17   0   -0.04    0.40 
  -5 -17   0   -1.77    0.71 
  -6 -17   0    0.20    0.41 
  -6 -17   0   -1.24    0.69 
  -7 -17   0    0.66    0.45 
  -7 -17   0   -1.29    0.74 
   7  17   0    0.11    0.43 
  -8 -17   0    2.54    0.46 
   8  17   0    2.56    0.46 
  -9 -17   0    0.38    0.50 
 -10 -17   0    4.09    0.53 
  10 -18   0    3.36    0.90 
   3 -18   0    1.49    0.62 
   2 -18   0    1.02    0.61 
   1 -18   0    0.68    0.63 
   0 -18   0   -0.04    0.65 
  -1 -18   0   -0.47    0.65 
  -2 -18   0    0.15    0.69 
  -3 -18   0   -1.11    0.72 
  -4 -18   0    0.08    0.37 
  -5 -18   0    4.42    0.39 
  -5 -18   0    2.96    0.75 
  -6 -18   0   -0.74    0.77 
  -6 -18   0    0.44    0.41 
  -7 -18   0    3.10    0.46 
  -8 -18   0    5.18    0.52 
   8  18   0    4.86    0.50 
  -9 -18   0    7.54    0.55 
   4 -19   0    1.18    0.66 
   3 -19   0    2.91    0.67 
   2 -19   0    4.03    0.68 
   1 -19   0    6.79    0.68 
   0 -19   0    0.89    0.69 
  -1 -19   0   -0.48    0.68 
  -2 -19   0   -0.76    0.72 
  -3 -19   0   -1.49    0.73 
  -4 -19   0   -1.60    0.75 
  -4 -19   0    0.43    0.41 
  -5 -19   0    2.92    0.42 
  -6 -19   0    3.05    0.47 
  -7 -19   0    3.44    0.47 
  -8 -19   0    0.27    0.51 
   5 -20   0    1.73    0.69 
   4 -20   0    2.60    0.69 
   3 -20   0    4.26    0.72 
   2 -20   0    1.12    0.67 
   1 -20   0    1.29    0.73 
   0 -20   0   -0.95    0.71 
  -1 -20   0    2.12    0.73 
  -6 -20   0    2.44    0.52 
  -7 -20   0    1.05    0.57 
   3 -21   0    2.82    0.71 
   2 -21   0    2.02    0.73 
   1 -21   0   -0.35    0.71 
   0 -21   0   -0.13    0.79 
  -1 -21   0    0.52    0.77 
  -4 -21   1   -0.39    0.91 
  -2 -21   1   -1.62    0.81 
   1 -21   1   -0.68    0.73 
   2 -21   1    1.10    0.74 
   3 -21   1    1.86    0.72 
  -8 -20   1    2.76    0.54 
  -7 -20   1   -1.22    1.05 
  -7 -20   1    0.83    0.51 
  -6 -20   1    2.86    0.87 
  -6 -20   1    5.52    0.53 
  -5 -20   1   -1.62    0.83 
  -1 -20   1   -1.52    0.71 
   0 -20   1   -1.19    0.71 
   1 -20   1    0.48    0.72 
   2 -20   1    3.69    0.68 
   3 -20   1    2.01    0.68 
   4 -20   1    1.13    0.67 
   5 -20   1    2.36    0.70 
 -10 -19   1    2.03    0.59 
  -9 -19   1    0.59    0.54 
  -8 -19   1    2.63    0.56 
  -7 -19   1    0.97    0.50 
  -7 -19   1   -1.52    0.83 
  -6 -19   1   -1.92    0.81 
  -6 -19   1    0.53    0.50 
  -5 -19   1    5.82    0.47 
  -4 -19   1    1.61    0.74 
  -4 -19   1    3.36    0.43 
  -3 -19   1   -0.33    0.76 
  -2 -19   1   -1.03    0.71 
  -1 -19   1    0.99    0.70 
   0 -19   1    0.55    0.66 
   1 -19   1    0.77    0.67 
   2 -19   1    2.00    0.66 
   3 -19   1    2.10    0.66 
   4 -19   1    3.27    0.63 
 -11 -18   1    0.82    0.57 
 -10 -18   1    0.78    0.56 
  -9 -18   1    0.66    0.53 
   8  18  -1    0.52    0.51 
  -8 -18   1    0.86    0.50 
  -7 -18   1    0.49    0.49 
  -7 -18   1   -1.54    0.78 
  -6 -18   1   -1.33    0.77 
  -6 -18   1    0.36    0.43 
  -5 -18   1    6.29    0.75 
  -5 -18   1    7.29    0.46 
  -4 -18   1    0.04    0.38 
  -4 -18   1   -0.36    0.76 
  -3 -18   1   13.58    0.73 
  -2 -18   1    3.13    0.70 
  -1 -18   1   -0.46    0.69 
   0 -18   1    1.53    0.65 
   1 -18   1    1.31    0.64 
   2 -18   1    0.97    0.63 
   3 -18   1    3.32    0.62 
   9 -18   1    3.48    0.79 
  10 -18   1    2.98    0.90 
 -12 -17   1    2.37    0.63 
 -11 -17   1    0.98    0.61 
 -10 -17   1    0.38    0.57 
  -9 -17   1    0.12    0.51 
   8  17  -1    0.67    0.46 
  -8 -17   1    0.07    0.45 
   7  17  -1    0.17    0.44 
  -7 -17   1    0.22    0.47 
  -7 -17   1   -1.39    0.74 
  -6 -17   1   -1.31    0.73 
  -6 -17   1   -0.24    0.42 
  -5 -17   1   -0.21    0.74 
  -5 -17   1    0.71    0.23 
  -5 -17   1    0.50    0.40 
  -4 -17   1   -0.99    0.71 
  -4 -17   1   -0.21    0.38 
  -3 -17   1    0.08    0.33 
  -3 -17   1   -0.34    0.69 
  -2 -17   1   13.39    0.70 
  -1 -17   1   -0.48    0.60 
   0 -17   1    1.59    0.63 
   1 -17   1    2.89    0.60 
   2 -17   1    0.80    0.59 
   3 -17   1    3.78    0.60 
   6 -17   1    1.58    0.60 
   7 -17   1    4.85    0.67 
   8 -17   1    2.30    0.75 
   9 -17   1    1.88    0.76 
  10 -17   1    2.65    0.84 
 -12 -16   1    0.78    0.57 
 -11 -16   1    6.06    0.58 
 -10 -16   1    0.45    0.55 
  -9 -16   1    1.21    0.51 
   8  16  -1    1.11    0.46 
  -8 -16   1    1.12    0.47 
   7  16  -1    5.36    0.45 
  -7 -16   1    5.55    0.45 
   6  16  -1    8.97    0.40 
  -6 -16   1    7.29    0.71 
  -6 -16   1    8.69    0.41 
  -5 -16   1    9.26    0.45 
  -5 -16   1    8.97    0.75 
  -4 -16   1    6.80    0.37 
  -4 -16   1    5.95    0.66 
  -3 -16   1   28.91    0.75 
  -2 -16   1    3.35    0.65 
  -1 -16   1    8.90    0.66 
   0 -16   1    6.11    0.59 
   1 -16   1    0.39    0.59 
   2 -16   1    1.15    0.58 
   6 -16   1    7.09    0.56 
   7 -16   1    1.65    0.63 
   8 -16   1    2.64    0.74 
   9 -16   1    3.76    0.82 
  10 -16   1    2.86    0.87 
  12 -16   1    2.27    0.95 
 -12 -15   1    1.01    0.57 
 -11 -15   1    7.37    0.57 
 -11 -15   1    3.99    0.90 
 -10 -15   1    0.65    0.57 
   9  15  -1    2.48    0.50 
  -9 -15   1    2.61    0.48 
  -9 -15   1    2.33    0.50 
  -9 -15   1    0.58    0.78 
   8  15  -1    0.85    0.45 
  -8 -15   1    0.38    0.50 
  -8 -15   1   -1.27    0.80 
  -8 -15   1    0.65    0.48 
   7  15  -1    5.45    0.42 
  -7 -15   1    4.77    0.44 
   6  15  -1   -0.12    0.39 
  -6 -15   1   -0.70    0.67 
  -6 -15   1    0.26    0.41 
  -5 -15   1    1.10    0.31 
  -5 -15   1   -0.08    0.38 
  -5 -15   1    0.41    0.66 
  -4 -15   1   13.10    0.66 
  -4 -15   1   14.15    0.29 
  -4 -15   1   13.63    0.38 
  -3 -15   1    0.26    0.62 
  -3 -15   1    0.00    0.33 
  -2 -15   1    0.22    0.60 
  -1 -15   1   19.59    0.64 
   0 -15   1    4.79    0.55 
   1 -15   1    3.22    0.56 
   2 -15   1    0.53    0.54 
   5 -15   1   10.73    0.52 
   6 -15   1    7.55    0.57 
   7 -15   1    6.35    0.59 
   8 -15   1    1.73    0.67 
   9 -15   1    0.94    0.75 
  10 -15   1    7.14    0.89 
  11 -15   1    2.44    0.87 
  12 -15   1    1.84    0.93 
  13 -15   1    1.68    0.99 
  15  14  -1    4.76    1.58 
  14  14  -1    6.93    1.48 
 -13 -14   1    0.60    0.55 
 -12 -14   1    2.25    0.56 
 -11 -14   1    1.48    0.54 
 -10 -14   1    0.10    0.67 
 -10 -14   1   -1.40    0.80 
 -10 -14   1    0.79    0.52 
   9  14  -1    0.07    0.48 
  -9 -14   1   -1.68    0.77 
  -9 -14   1   -0.79    0.50 
  -9 -14   1    0.07    0.46 
   8  14  -1   10.04    0.45 
  -8 -14   1    9.28    0.51 
  -8 -14   1    8.33    0.75 
  -8 -14   1    9.83    0.47 
   7  14  -1    0.15    0.41 
  -7 -14   1   -0.53    0.67 
  -7 -14   1    0.30    0.44 
  -7 -14   1    0.67    0.37 
  -7 -14   1    0.05    0.45 
   6  14  -1    0.25    0.39 
  -6 -14   1    0.79    0.33 
  -6 -14   1    0.46    0.40 
  -6 -14   1    0.27    0.67 
   5  14  -1    0.65    0.35 
  -5 -14   1    0.40    0.61 
  -5 -14   1    1.02    0.36 
  -5 -14   1    0.68    0.30 
  -4 -14   1   30.94    0.35 
  -4 -14   1   29.22    0.65 
  -4 -14   1   30.70    0.42 
  -3 -14   1    1.69    0.39 
  -3 -14   1    0.62    0.34 
  -3 -14   1    1.85    0.64 
  -2 -14   1    0.71    0.55 
  -1 -14   1    1.34    0.53 
   0 -14   1   -0.27    0.52 
   1 -14   1    3.38    0.53 
   5 -14   1    2.57    0.44 
   6 -14   1    1.87    0.49 
   7 -14   1    5.97    0.61 
  -8  14  -1    0.25    0.30 
   8 -14   1    0.54    0.62 
  -9  14  -1    5.21    0.40 
   9 -14   1    5.54    0.74 
  10 -14   1    0.79    0.72 
  11 -14   1    8.53    0.90 
  12 -14   1    0.43    0.91 
  13 -14   1    2.15    0.98 
  16  13  -1    4.36    1.66 
  15  13  -1    3.74    1.73 
  14  13  -1    4.54    1.44 
  13  13  -1   21.66    1.42 
  12  13  -1    5.14    1.26 
 -12 -13   1    3.37    0.54 
 -11 -13   1    0.60    0.80 
 -11 -13   1    2.93    0.55 
  10  13  -1    0.89    0.50 
 -10 -13   1    0.40    0.50 
 -10 -13   1   -0.51    0.54 
   9  13  -1    0.25    0.49 
  -9 -13   1   -0.59    0.47 
  -9 -13   1    0.19    0.53 
   8  13  -1    1.87    0.44 
  -8 -13   1    2.10    0.74 
  -8 -13   1    1.99    0.48 
  -8 -13   1    1.80    0.45 
  -8 -13   1    2.02    0.35 
   7  13  -1    1.33    0.43 
  -7 -13   1    0.34    0.32 
  -7 -13   1    0.68    0.46 
  -7 -13   1    0.84    0.41 
  -7 -13   1    0.47    0.61 
   6  13  -1    0.46    0.38 
  -6 -13   1    1.63    0.47 
  -6 -13   1    0.15    0.59 
  -6 -13   1    0.26    0.30 
  -6 -13   1    0.10    0.41 
  -6 -13   1    0.97    0.39 
   5  13  -1   -0.42    0.34 
  -5 -13   1    0.32    0.58 
  -5 -13   1    0.86    0.38 
  -5 -13   1    0.14    0.34 
  -5 -13   1    0.08    0.28 
  -4 -13   1    3.13    0.55 
  -4 -13   1    3.26    0.25 
  -4 -13   1    3.25    0.31 
  -4 -13   1    3.64    0.34 
  -3 -13   1    6.33    0.34 
  -3 -13   1    5.74    0.57 
  -3 -13   1    5.51    0.33 
  -2 -13   1    4.92    0.56 
  -1 -13   1   12.42    0.55 
   0 -13   1    0.86    0.49 
   1 -13   1   10.96    0.48 
   5 -13   1   34.81    0.57 
   6 -13   1    0.73    0.53 
  -7  13  -1   24.96    0.33 
   7 -13   1   24.96    0.62 
  -8  13  -1    4.30    0.34 
  -8  13  -1    3.97    0.22 
   8 -13   1    5.20    0.63 
  -9  13  -1    3.26    0.38 
   9 -13   1    3.35    0.70 
  10 -13   1    0.16    0.75 
  11 -13   1    0.70    0.74 
  12 -13   1    0.46    0.87 
  13 -13   1    1.37    0.88 
  14 -13   1    1.18    1.05 
  16  12  -1    5.73    1.64 
  15  12  -1    4.52    1.74 
  14  12  -1    5.76    1.49 
  13  12  -1    2.57    1.38 
 -13 -12   1    0.35    0.53 
  12  12  -1    5.40    1.29 
 -12 -12   1    3.59    0.53 
  11  12  -1    2.94    1.24 
 -11 -12   1    1.17    0.52 
 -11 -12   1    0.12    0.65 
 -11 -12   1   -1.51    0.73 
  10  12  -1    0.99    0.41 
  10  12  -1    0.99    0.50 
  10  12  -1    1.15    1.09 
 -10 -12   1    0.43    0.53 
 -10 -12   1    0.18    0.48 
 -10 -12   1   -1.11    0.70 
   9  12  -1    7.90    0.51 
   9  12  -1    8.00    0.37 
  -9 -12   1    8.06    0.48 
  -9 -12   1    7.38    0.58 
  -9 -12   1    8.35    0.53 
  -9 -12   1    8.11    0.39 
  -9 -12   1    7.04    0.72 
   8  12  -1    2.26    0.30 
   8  12  -1    2.33    0.45 
  -8 -12   1    2.02    0.57 
  -8 -12   1    2.52    0.36 
  -8 -12   1    1.04    0.46 
  -8 -12   1    1.89    0.44 
  -8 -12   1    1.96    0.70 
   7  12  -1    0.87    0.40 
  -7 -12   1    1.84    0.65 
  -7 -12   1    1.18    0.43 
  -7 -12   1    1.64    0.32 
  -7 -12   1    1.01    0.40 
  -7 -12   1    1.39    0.50 
   6  12  -1    0.76    0.39 
  -6 -12   1    0.16    0.38 
  -6 -12   1    0.12    0.30 
  -6 -12   1    0.09    0.42 
  -6 -12   1    0.43    0.56 
  -6 -12   1    0.59    0.38 
  -6 -12   1    0.39    0.59 
   5  12  -1    4.10    0.34 
  -5 -12   1    4.60    0.54 
  -5 -12   1    5.15    0.37 
  -5 -12   1    4.88    0.28 
  -5 -12   1    4.55    0.38 
  -5 -12   1    4.14    0.34 
   4  12  -1    6.36    0.31 
  -4 -12   1    6.87    0.52 
  -4 -12   1    7.19    0.25 
  -4 -12   1    6.79    0.31 
  -4 -12   1    7.13    0.33 
  -3 -12   1   27.60    0.38 
  -3 -12   1   26.46    0.36 
  -3 -12   1   27.11    0.29 
  -3 -12   1   26.68    0.57 
  -2 -12   1    1.67    0.54 
  -1 -12   1    7.92    0.50 
   0 -12   1    5.75    0.49 
   5 -12   1    3.22    0.42 
  -6  12  -1    5.99    0.25 
   6 -12   1    6.02    0.49 
  -7  12  -1   -0.19    0.21 
  -7  12  -1   -0.04    0.30 
   7 -12   1   -0.14    0.56 
   7 -12   1    0.09    0.41 
  -8  12  -1    9.09    0.39 
  -8  12  -1    8.54    0.33 
   8 -12   1    9.15    0.45 
   8 -12   1    9.25    0.63 
  -9  12  -1    2.01    0.48 
  -9  12  -1    1.57    0.36 
   9 -12   1    1.88    0.50 
   9 -12   1    1.84    0.64 
  10 -12   1    0.13    0.71 
  11 -12   1    8.59    0.81 
  12 -12   1    4.96    0.85 
  13 -12   1    0.24    0.82 
  14 -12   1    2.02    0.95 
  15 -12   1    1.58    0.99 
  17  11  -1    3.32    1.83 
  16  11  -1    2.71    1.70 
  15  11  -1    3.22    1.59 
  14  11  -1    2.18    1.44 
  13  11  -1    4.07    1.39 
  13  11  -1    2.74    0.51 
 -13 -11   1    2.51    0.53 
  12  11  -1    3.82    1.30 
  12  11  -1    2.43    0.49 
 -12 -11   1    2.64    0.49 
  11  11  -1    2.88    0.46 
  11  11  -1    5.23    1.25 
  11  11  -1    2.87    0.55 
 -11 -11   1    2.53    0.46 
 -11 -11   1    2.63    0.50 
 -11 -11   1    2.81    0.56 
  10  11  -1    5.73    0.55 
  10  11  -1    5.69    1.20 
  10  11  -1    5.52    0.45 
 -10 -11   1    5.69    0.77 
 -10 -11   1    5.70    0.45 
 -10 -11   1    5.26    0.55 
 -10 -11   1    5.59    0.52 
   9  11  -1   16.71    0.46 
   9  11  -1   16.86    1.20 
   9  11  -1   17.16    0.62 
  -9 -11   1   16.68    0.60 
  -9 -11   1   16.05    0.74 
  -9 -11   1   16.27    0.54 
  -9 -11   1   15.96    0.46 
   8  11  -1    4.05    0.43 
   8  11  -1    3.84    0.31 
  -8 -11   1    4.21    0.46 
  -8 -11   1    4.50    0.61 
  -8 -11   1    3.97    0.33 
  -8 -11   1    3.72    0.41 
  -8 -11   1    3.46    0.50 
   7  11  -1    2.68    0.27 
   7  11  -1    2.27    0.40 
  -7 -11   1    2.58    0.31 
  -7 -11   1    3.80    0.63 
  -7 -11   1    2.23    0.50 
  -7 -11   1    2.22    0.43 
  -7 -11   1    2.44    0.39 
   6  11  -1   15.28    0.42 
  -6 -11   1   16.08    0.56 
  -6 -11   1   16.00    0.35 
  -6 -11   1   16.27    0.43 
  -6 -11   1   15.28    0.42 
  -6 -11   1   14.42    0.44 
  -6 -11   1   15.76    0.59 
   5  11  -1   -0.04    0.33 
  -5 -11   1   -0.61    0.32 
  -5 -11   1    0.42    0.47 
  -5 -11   1   -0.04    0.26 
  -5 -11   1   -0.02    0.34 
  -5 -11   1    0.43    0.51 
  -5 -11   1   -0.12    0.38 
   4  11  -1   -0.64    0.40 
   4  11  -1   -0.38    0.29 
  -4 -11   1   -0.02    0.31 
  -4 -11   1   -0.16    0.30 
  -4 -11   1    0.64    0.50 
  -4 -11   1    0.37    0.24 
  -4 -11   1    0.22    0.46 
   3  11  -1   51.65    0.66 
  -3 -11   1   50.72    0.46 
  -3 -11   1   52.41    0.46 
  -3 -11   1   50.33    0.63 
  -3 -11   1   51.73    0.49 
   2  11  -1    1.24    0.41 
  -2 -11   1    1.22    0.45 
   1  11  -1  108.56    1.16 
  -1 -11   1  109.02    1.34 
   0 -11   1    9.29    0.44 
   5 -11   1   -0.47    0.38 
  -6  11  -1   -0.06    0.25 
  -6  11  -1    0.06    0.27 
   6 -11   1    0.23    0.44 
   6 -11   1    0.43    0.28 
  -7  11  -1   -0.42    0.31 
  -7  11  -1   -0.13    0.32 
   7 -11   1   -0.13    0.32 
   7 -11   1   -1.03    0.50 
   7 -11   1   -0.59    0.41 
  -8  11  -1    1.05    0.34 
  -8  11  -1    1.59    0.45 
   8 -11   1    0.84    0.59 
   8 -11   1    1.02    0.47 
   8 -11   1    1.33    0.39 
  -9  11  -1    1.23    0.51 
  -9  11  -1    0.27    0.37 
   9 -11   1    0.53    0.50 
   9 -11   1    0.52    0.64 
 -10  11  -1    3.10    0.39 
 -10  11  -1    2.95    0.50 
  10 -11   1    3.36    0.69 
  10 -11   1    2.41    0.51 
  11 -11   1   13.49    0.71 
  12 -11   1    1.92    0.84 
  13 -11   1    3.88    0.83 
  14 -11   1    3.37    1.06 
  15 -11   1    1.36    0.94 
  17  10  -1    2.15    1.85 
  16  10  -1    2.70    1.68 
  16  10  -1    0.40    0.76 
  15  10  -1    1.59    1.53 
  15  10  -1    0.06    0.58 
  14  10  -1    0.87    0.54 
  14  10  -1    2.98    1.50 
  13  10  -1    0.76    0.55 
  13  10  -1    0.65    1.34 
 -13 -10   1    0.42    0.49 
  12  10  -1    0.48    0.50 
  12  10  -1    1.15    1.29 
 -12 -10   1    0.83    0.63 
 -12 -10   1    0.75    0.48 
 -12 -10   1    0.32    0.44 
  11  10  -1   11.17    0.55 
  11  10  -1   12.69    1.28 
  11  10  -1   11.21    0.48 
 -11 -10   1   10.73    0.55 
 -11 -10   1   11.13    0.43 
 -11 -10   1   10.39    0.50 
  10  10  -1   75.06    1.05 
  10  10  -1   76.31    0.92 
  10  10  -1   75.48    1.53 
 -10 -10   1   73.40    1.04 
 -10 -10   1   74.93    0.97 
 -10 -10   1   76.86    1.45 
 -10 -10   1   77.50    0.94 
   9  10  -1    0.82    1.12 
   9  10  -1    0.82    0.39 
   9  10  -1    1.12    0.49 
  -9 -10   1    1.36    0.65 
  -9 -10   1    0.33    0.44 
  -9 -10   1    0.63    0.35 
  -9 -10   1    0.83    0.49 
   8  10  -1    0.80    1.02 
   8  10  -1    0.30    0.43 
   8  10  -1    0.46    0.34 
  -8 -10   1    0.43    0.41 
  -8 -10   1    1.18    0.60 
  -8 -10   1    0.66    0.45 
  -8 -10   1   -0.12    0.47 
  -8 -10   1    0.46    0.34 
   7  10  -1   31.59    0.45 
   7  10  -1   31.83    1.01 
   7  10  -1   31.83    0.35 
  -7 -10   1   31.00    0.52 
  -7 -10   1   31.39    0.61 
  -7 -10   1   31.13    0.44 
  -7 -10   1   31.51    0.46 
  -7 -10   1   31.21    0.36 
   6  10  -1    0.56    0.36 
   6  10  -1    1.12    0.24 
  -6 -10   1    1.10    0.28 
  -6 -10   1    1.02    0.44 
  -6 -10   1    0.99    0.35 
  -6 -10   1    0.87    0.39 
  -6 -10   1    1.76    0.38 
  -6 -10   1    1.21    0.48 
   5  10  -1    7.87    0.40 
   5  10  -1    7.82    0.33 
  -5 -10   1    7.75    0.42 
  -5 -10   1    8.04    0.25 
  -5 -10   1    8.19    0.33 
  -5 -10   1    8.47    0.48 
  -5 -10   1    7.09    0.31 
  -5 -10   1    8.43    0.36 
   4  10  -1    0.81    0.31 
   4  10  -1    0.74    0.27 
   4  10  -1    0.14    0.37 
  -4 -10   1    0.99    0.43 
  -4 -10   1    0.70    0.40 
  -4 -10   1    0.85    0.22 
  -4 -10   1    1.08    0.28 
  -4 -10   1    1.36    0.30 
  -4 -10   1    1.09    0.32 
   3  10  -1   69.53    0.60 
   3  10  -1   68.45    0.50 
  -3 -10   1   70.80    0.46 
  -3 -10   1   69.18    0.49 
  -3 -10   1   68.98    0.63 
  -3 -10   1   70.39    0.48 
   2  10  -1    5.20    0.42 
  -2 -10   1    5.13    0.19 
  -2 -10   1    4.72    0.43 
   1  10  -1   34.24    0.57 
  -1 -10   1   32.22    0.53 
   0  10  -1   17.82    0.48 
   0 -10   1   17.30    0.50 
   4 -10   1   15.21    0.22 
   4 -10   1   13.85    0.31 
  -5  10  -1    3.30    0.23 
   5 -10   1    3.47    0.25 
  -6  10  -1   12.69    0.17 
  -6  10  -1   13.91    0.29 
   6 -10   1   13.07    0.37 
   6 -10   1   13.04    0.44 
   6 -10   1   13.68    0.31 
  -7  10  -1   17.87    0.35 
  -7  10  -1   18.36    0.44 
   7 -10   1   17.43    0.45 
   7 -10   1   17.41    0.54 
   7 -10   1   17.61    0.36 
  -8  10  -1    0.38    0.43 
  -8  10  -1    0.16    0.31 
   8 -10   1    0.65    0.35 
   8 -10   1   -0.26    0.56 
   8 -10   1   -0.37    0.45 
  -9  10  -1    6.04    0.38 
  -9  10  -1    6.91    0.56 
   9 -10   1    5.67    0.63 
   9 -10   1    5.87    0.55 
   9 -10   1    5.76    0.42 
 -10  10  -1    0.87    0.54 
 -10  10  -1    0.77    0.39 
  10 -10   1    0.41    0.61 
  10 -10   1   -0.66    0.67 
  10 -10   1    0.03    0.43 
 -11  10  -1    4.15    0.61 
  11 -10   1    4.96    0.67 
  11 -10   1    4.49    0.73 
 -12  10  -1    2.25    0.70 
  12 -10   1    1.40    0.75 
  13 -10   1   10.64    0.88 
  14 -10   1    1.99    0.88 
  15 -10   1    1.93    0.96 
  16 -10   1    1.94    0.97 
  17   9  -1    1.57    1.77 
  17   9  -1    0.96    0.70 
  16   9  -1    0.67    1.63 
  16   9  -1    1.02    0.66 
  15   9  -1    1.23    1.60 
  15   9  -1    0.40    0.60 
  14   9  -1    6.83    0.59 
  14   9  -1    7.15    1.51 
  13   9  -1    0.70    1.39 
  13   9  -1    0.36    0.54 
 -13  -9   1    0.12    0.46 
 -13  -9   1    0.16    0.46 
  12   9  -1    4.53    0.50 
  12   9  -1    4.16    0.56 
  12   9  -1    4.04    1.31 
 -12  -9   1    4.68    0.48 
 -12  -9   1    4.45    0.45 
 -12  -9   1    4.34    0.58 
  11   9  -1    4.04    0.55 
  11   9  -1    4.35    0.51 
  11   9  -1    4.12    1.29 
 -11  -9   1    4.13    0.44 
 -11  -9   1    3.95    0.55 
 -11  -9   1    3.75    0.52 
  10   9  -1   88.01    0.95 
  10   9  -1   88.84    0.82 
  10   9  -1   88.80    1.53 
 -10  -9   1   90.33    0.85 
 -10  -9   1   87.49    0.93 
 -10  -9   1   86.56    0.85 
   9   9  -1    2.87    1.13 
   9   9  -1    2.38    0.49 
   9   9  -1    3.44    0.42 
  -9  -9   1    3.71    0.63 
  -9  -9   1    2.72    0.37 
  -9  -9   1    1.53    0.45 
  -9  -9   1    2.92    0.50 
   8   9  -1    2.64    1.01 
   8   9  -1    2.76    0.36 
   8   9  -1    3.02    0.44 
  -8  -9   1    4.02    0.59 
  -8  -9   1    3.05    0.45 
  -8  -9   1    1.60    0.41 
  -8  -9   1    3.68    0.34 
  -8  -9   1    2.38    0.45 
   7   9  -1   21.83    1.08 
   7   9  -1   20.09    0.51 
   7   9  -1   21.19    0.49 
  -7  -9   1   20.47    0.50 
  -7  -9   1   20.82    0.54 
  -7  -9   1   19.62    0.55 
  -7  -9   1   21.13    0.64 
  -7  -9   1   20.61    0.42 
   6   9  -1    3.19    0.39 
   6   9  -1    3.02    0.87 
   6   9  -1    2.96    0.29 
  -6  -9   1    2.77    0.29 
  -6  -9   1    3.18    0.38 
  -6  -9   1    3.22    0.41 
  -6  -9   1    2.75    0.45 
  -6  -9   1    3.07    0.49 
  -6  -9   1    2.46    0.36 
   5   9  -1    6.26    0.32 
   5   9  -1    6.42    0.20 
   5   9  -1    6.52    0.33 
   5   9  -1    7.26    0.39 
  -5  -9   1    6.94    0.36 
  -5  -9   1    6.29    0.41 
  -5  -9   1    6.85    0.25 
  -5  -9   1    6.11    0.30 
  -5  -9   1    6.78    0.44 
  -5  -9   1    7.11    0.34 
   4   9  -1    4.17    0.29 
   4   9  -1    4.01    0.36 
   4   9  -1    3.79    0.28 
  -4  -9   1    3.83    0.37 
  -4  -9   1    4.37    0.27 
  -4  -9   1    4.09    0.27 
  -4  -9   1    4.19    0.39 
  -4  -9   1    4.23    0.21 
  -4  -9   1    4.32    0.32 
   3   9  -1   41.64    0.60 
  -3  -9   1   42.15    0.52 
  -3  -9   1   40.29    0.61 
  -3  -9   1   41.65    0.50 
  -3  -9   1   42.96    0.52 
   2   9  -1   12.97    0.36 
  -2  -9   1   12.70    0.17 
  -2  -9   1   12.54    0.37 
   1   9  -1   46.04    0.75 
  -1  -9   1   43.85    0.92 
   0   9  -1    4.57    0.38 
   0  -9   1    3.46    0.36 
  -1   9  -1    1.12    0.37 
   3  -9   1   -0.10    0.15 
  -4   9  -1   -0.22    0.18 
   4  -9   1    0.01    0.19 
   4  -9   1   -0.64    0.26 
  -5   9  -1    3.06    0.23 
   5  -9   1    3.15    0.23 
   5  -9   1    2.65    0.34 
  -6   9  -1   18.68    0.28 
  -6   9  -1   19.39    0.38 
   6  -9   1   18.29    0.41 
   6  -9   1   19.08    0.29 
   6  -9   1   19.24    0.38 
  -7   9  -1   40.30    0.77 
  -7   9  -1   36.96    0.66 
   7  -9   1   38.92    0.80 
   7  -9   1   37.74    0.69 
   7  -9   1   39.36    0.80 
  -8   9  -1    3.29    0.43 
  -8   9  -1    2.95    0.31 
   8  -9   1    2.86    0.46 
   8  -9   1    3.11    0.52 
   8  -9   1    3.20    0.32 
  -9   9  -1    9.52    0.41 
  -9   9  -1   11.34    0.57 
   9  -9   1    9.92    0.60 
   9  -9   1   10.18    0.43 
   9  -9   1   10.29    0.58 
 -10   9  -1    1.91    0.59 
 -10   9  -1    0.59    0.38 
  10  -9   1    0.91    0.55 
  10  -9   1    0.87    0.43 
  10  -9   1    0.82    0.60 
 -11   9  -1    7.53    0.44 
 -11   9  -1    8.50    0.65 
  11  -9   1    8.27    0.65 
  11  -9   1    7.30    0.74 
 -12   9  -1    2.67    0.67 
  12  -9   1    2.26    0.77 
  12  -9   1    2.61    0.70 
 -13   9  -1   12.30    0.73 
  13  -9   1   11.24    0.79 
  14  -9   1    5.88    0.85 
  15  -9   1    1.76    0.85 
  16  -9   1    2.64    1.00 
  17  -9   1    0.96    0.95 
  18   8  -1    1.89    0.78 
  18   8  -1   -0.11    1.83 
  17   8  -1    9.84    0.69 
  17   8  -1    9.67    1.79 
  16   8  -1    2.23    1.69 
  16   8  -1    3.29    0.68 
  15   8  -1    1.43    0.62 
  15   8  -1    1.55    1.61 
  14   8  -1    3.47    0.58 
  14   8  -1    3.46    1.52 
 -14  -8   1    2.59    0.50 
  13   8  -1    3.20    1.43 
  13   8  -1    3.39    0.54 
 -13  -8   1    2.68    0.48 
 -13  -8   1    3.12    0.73 
 -13  -8   1    2.84    0.44 
  12   8  -1    2.19    0.54 
  12   8  -1    1.36    0.59 
  12   8  -1    2.21    1.40 
 -12  -8   1    1.83    0.58 
 -12  -8   1    2.44    0.47 
 -12  -8   1    1.85    0.49 
  11   8  -1   42.14    1.42 
  11   8  -1   40.53    0.61 
  11   8  -1   40.93    0.56 
 -11  -8   1   40.91    0.47 
 -11  -8   1   39.96    0.63 
 -11  -8   1   40.37    0.56 
  10   8  -1   19.68    1.21 
  10   8  -1   19.92    0.54 
  10   8  -1   20.05    0.45 
 -10  -8   1   20.35    0.53 
 -10  -8   1   18.12    0.45 
 -10  -8   1   19.79    0.39 
   9   8  -1   34.89    1.24 
   9   8  -1   35.19    0.53 
   9   8  -1   33.30    0.58 
  -9  -8   1   35.54    0.49 
  -9  -8   1   33.37    0.56 
  -9  -8   1   35.51    0.72 
  -9  -8   1   34.37    0.60 
   8   8  -1   12.02    0.38 
   8   8  -1   11.71    0.44 
   8   8  -1   11.74    0.99 
  -8  -8   1   13.03    0.54 
  -8  -8   1   11.84    0.32 
  -8  -8   1   11.54    0.39 
  -8  -8   1   12.29    0.46 
   7   8  -1   38.25    1.14 
   7   8  -1   37.07    0.57 
   7   8  -1   36.44    0.59 
  -7  -8   1   37.98    0.60 
  -7  -8   1   37.60    0.75 
  -7  -8   1   38.59    0.96 
  -7  -8   1   36.24    0.59 
  -7  -8   1   36.86    0.57 
   6   8  -1   18.17    0.36 
   6   8  -1   19.03    0.87 
   6   8  -1   18.40    0.39 
   6   8  -1   19.03    0.31 
  -6  -8   1   18.99    0.41 
  -6  -8   1   18.31    0.36 
  -6  -8   1   18.51    0.47 
  -6  -8   1   18.79    0.29 
  -6  -8   1   18.01    0.41 
  -6  -8   1   19.05    0.38 
   5   8  -1   13.48    0.41 
   5   8  -1   13.05    0.42 
   5   8  -1   12.53    0.83 
   5   8  -1   12.60    0.31 
   5   8  -1   11.56    0.38 
  -5  -8   1   12.17    0.36 
  -5  -8   1   12.06    0.45 
  -5  -8   1   13.28    0.39 
  -5  -8   1   12.13    0.30 
  -5  -8   1   13.44    0.41 
  -5  -8   1   11.28    0.42 
   4   8  -1   32.49    0.39 
   4   8  -1   34.20    0.47 
  -4  -8   1   33.31    0.41 
  -4  -8   1   32.75    0.32 
  -4  -8   1   31.94    0.46 
  -4  -8   1   32.63    0.47 
   3   8  -1    4.94    0.32 
   3   8  -1    5.98    0.40 
  -3  -8   1    5.90    0.29 
  -3  -8   1    5.35    0.28 
  -3  -8   1    4.93    0.23 
  -3  -8   1    5.05    0.39 
   2   8  -1   20.63    0.51 
  -2  -8   1   21.59    0.70 
  -2  -8   1   20.20    0.36 
  -2  -8   1   20.28    0.38 
  -2  -8   1   20.06    0.37 
   1   8  -1   11.96    0.35 
  -1  -8   1   11.77    0.34 
   0   8  -1    3.05    0.32 
  -1   8  -1   18.49    0.40 
   3  -8   1   48.99    0.57 
   3  -8   1   50.23    0.58 
  -4   8  -1   56.80    0.89 
   4  -8   1   57.00    0.89 
   4  -8   1   59.08    0.92 
  -5   8  -1    0.96    0.21 
  -5   8  -1    1.11    0.25 
   5  -8   1    1.01    0.29 
   5  -8   1    1.12    0.21 
   5  -8   1    0.64    0.30 
  -6   8  -1    9.56    0.42 
  -6   8  -1    8.82    0.34 
   6  -8   1    8.60    0.45 
   6  -8   1    8.89    0.43 
   6  -8   1    9.96    0.43 
  -7   8  -1    0.27    0.25 
  -7   8  -1    0.87    0.38 
   7  -8   1    0.17    0.42 
   7  -8   1    0.55    0.28 
   7  -8   1   -0.10    0.40 
  -8   8  -1   26.55    0.74 
  -8   8  -1   26.45    0.62 
   8  -8   1   25.60    0.69 
   8  -8   1   25.07    0.68 
   8  -8   1   28.22    0.65 
  -9   8  -1    8.24    0.49 
  -9   8  -1    7.20    0.36 
   9  -8   1    6.44    0.55 
   9  -8   1    7.58    0.55 
   9  -8   1    7.39    0.36 
 -10   8  -1    1.75    0.37 
 -10   8  -1    1.95    0.56 
  10  -8   1    2.36    0.41 
  10  -8   1    1.54    0.61 
  10  -8   1    1.87    0.61 
 -11   8  -1   10.27    0.40 
 -11   8  -1   10.98    0.60 
  11  -8   1    9.65    0.65 
  11  -8   1   11.24    0.68 
  11  -8   1   10.91    0.45 
 -12   8  -1    2.51    0.61 
  12  -8   1    1.77    0.66 
  12  -8   1    1.94    0.66 
 -13   8  -1    3.85    0.68 
  13  -8   1    3.90    0.75 
  13  -8   1    3.11    0.70 
 -14   8  -1    0.73    0.77 
  14  -8   1    1.18    0.78 
  15  -8   1    6.53    0.82 
  16  -8   1    7.25    0.87 
  17  -8   1    2.60    0.96 
  18   7  -1    9.23    0.83 
  18   7  -1    8.07    1.88 
  17   7  -1    5.25    0.75 
  17   7  -1    4.28    1.86 
  16   7  -1    1.61    1.83 
  16   7  -1    2.41    0.69 
  15   7  -1    3.01    1.65 
  15   7  -1    2.64    0.60 
 -15  -7   1    2.65    0.50 
  14   7  -1    1.65    0.59 
  14   7  -1    1.53    1.55 
 -14  -7   1    1.09    0.46 
  13   7  -1   17.05    0.60 
  13   7  -1   16.42    1.48 
  13   7  -1   16.40    0.67 
 -13  -7   1   16.65    0.48 
 -13  -7   1   16.88    0.62 
  12   7  -1    3.74    0.53 
  12   7  -1    3.77    1.39 
  12   7  -1    4.26    0.61 
 -12  -7   1    3.49    0.56 
 -12  -7   1    3.08    0.42 
 -12  -7   1    3.28    0.46 
  11   7  -1    0.68    1.30 
  11   7  -1    0.77    0.54 
  11   7  -1    0.58    0.47 
 -11  -7   1    0.63    0.52 
 -11  -7   1    0.95    0.39 
 -11  -7   1    0.38    0.45 
  10   7  -1   20.36    1.30 
  10   7  -1   19.81    0.52 
  10   7  -1   19.25    0.60 
 -10  -7   1   19.72    0.46 
 -10  -7   1   18.98    0.56 
 -10  -7   1   19.08    0.52 
   9   7  -1   14.06    0.48 
   9   7  -1   12.91    0.52 
   9   7  -1   14.35    1.20 
  -9  -7   1   12.53    0.48 
  -9  -7   1   14.68    0.42 
  -9  -7   1   13.21    0.43 
  -9  -7   1   13.15    0.53 
   8   7  -1    3.71    1.01 
   8   7  -1    2.30    0.44 
   8   7  -1    3.02    0.37 
  -8  -7   1    2.68    0.39 
  -8  -7   1    3.68    0.51 
  -8  -7   1    3.30    0.40 
  -8  -7   1    3.28    0.45 
  -8  -7   1    3.55    0.32 
   7   7  -1    0.06    0.38 
   7   7  -1    0.31    0.32 
   7   7  -1    0.86    0.85 
   7   7  -1    0.66    0.31 
  -7  -7   1    0.31    0.34 
  -7  -7   1    0.76    0.40 
  -7  -7   1    0.90    0.37 
  -7  -7   1    1.16    0.45 
  -7  -7   1    1.16    0.28 
   6   7  -1   47.84    1.07 
   6   7  -1   48.11    0.77 
   6   7  -1   47.96    0.63 
   6   7  -1   48.67    0.86 
  -6  -7   1   47.63    0.76 
  -6  -7   1   46.53    0.68 
  -6  -7   1   48.40    0.76 
  -6  -7   1   49.55    0.66 
  -6  -7   1   49.59    0.98 
  -6  -7   1   49.31    0.69 
   5   7  -1    0.29    0.32 
   5   7  -1    0.48    0.24 
   5   7  -1    0.24    0.28 
   5   7  -1   -0.05    0.70 
   5   7  -1    0.07    0.32 
  -5  -7   1    0.15    0.29 
  -5  -7   1    0.58    0.34 
  -5  -7   1    0.52    0.28 
  -5  -7   1    0.62    0.33 
  -5  -7   1    0.50    0.23 
  -5  -7   1    0.02    0.32 
   4   7  -1  136.02    1.76 
   4   7  -1  136.34    1.82 
   4   7  -1  132.61    1.81 
   4   7  -1  136.10    1.77 
   4   7  -1  139.14    1.90 
  -4  -7   1  136.25    1.79 
  -4  -7   1  132.27    1.81 
  -4  -7   1  137.62    1.80 
  -4  -7   1  138.05    1.78 
  -4  -7   1  140.51    1.89 
  -4  -7   1  137.80    1.92 
   3   7  -1    0.53    0.30 
   3   7  -1    0.40    0.24 
   3   7  -1    0.69    0.24 
  -3  -7   1    0.41    0.22 
  -3  -7   1    0.17    0.21 
  -3  -7   1    0.80    0.26 
  -3  -7   1    0.54    0.30 
  -3  -7   1    0.32    0.17 
   2   7  -1   87.76    1.14 
   2   7  -1   86.87    1.11 
  -2  -7   1   89.57    1.28 
  -2  -7   1   86.34    1.11 
  -2  -7   1   88.70    1.09 
  -2  -7   1   88.09    1.08 
  -2  -7   1   88.66    1.09 
   1   7  -1   65.04    1.07 
  -1  -7   1   65.71    1.18 
   0   7  -1   38.01    0.53 
  -1   7  -1   29.10    0.48 
  -3   7  -1   61.31    0.66 
   3  -7   1   61.95    0.68 
   3  -7   1   60.74    0.66 
  -4   7  -1    9.03    0.14 
  -4   7  -1    8.79    0.19 
   4  -7   1    9.82    0.28 
   4  -7   1    9.05    0.20 
   4  -7   1    9.18    0.27 
  -5   7  -1   84.33    1.22 
  -5   7  -1   80.68    1.18 
   5  -7   1   81.01    1.18 
   5  -7   1   83.71    1.22 
   5  -7   1   85.69    1.25 
  -6   7  -1    4.02    0.17 
  -6   7  -1    3.43    0.31 
   6  -7   1    3.78    0.35 
   6  -7   1    3.45    0.34 
  -7   7  -1   54.06    0.73 
  -7   7  -1   54.94    0.62 
   7  -7   1   53.61    0.72 
   7  -7   1   55.51    0.66 
   7  -7   1   52.62    0.68 
  -8   7  -1    0.64    0.41 
  -8   7  -1    1.25    0.29 
   8  -7   1    1.67    0.30 
   8  -7   1    0.04    0.45 
   8  -7   1    0.12    0.44 
  -9   7  -1    5.12    0.35 
  -9   7  -1    5.67    0.49 
   9  -7   1    4.72    0.53 
   9  -7   1    5.59    0.37 
   9  -7   1    4.92    0.54 
 -10   7  -1    0.61    0.53 
 -10   7  -1    0.84    0.33 
  10  -7   1   -0.63    0.55 
  10  -7   1    0.34    0.35 
  10  -7   1   -1.02    0.54 
 -11   7  -1   12.78    0.60 
  11  -7   1   11.83    0.68 
  11  -7   1   13.16    0.43 
  11  -7   1   12.32    0.64 
 -12   7  -1   36.27    0.69 
  12  -7   1   36.10    0.78 
  12  -7   1   36.03    0.73 
 -13   7  -1   10.55    0.67 
  13  -7   1   10.57    0.71 
  13  -7   1   10.28    0.73 
 -14   7  -1    1.18    0.73 
  14  -7   1    0.40    0.74 
  14  -7   1    0.65    0.79 
 -15   7  -1    0.92    0.76 
  15  -7   1    0.35    0.79 
  16  -7   1    0.85    0.85 
  17  -7   1    2.15    0.91 
  18   6  -1    3.19    1.90 
  18   6  -1    6.03    0.86 
  17   6  -1    7.24    0.75 
  17   6  -1    5.80    1.76 
  16   6  -1    7.26    0.68 
  16   6  -1    5.37    1.70 
 -16  -6   1    6.10    0.52 
  15   6  -1    6.14    0.62 
  15   6  -1    4.91    1.62 
 -15  -6   1    6.12    0.50 
  14   6  -1    2.89    0.60 
  14   6  -1    3.55    1.60 
 -14  -6   1    2.96    0.50 
  13   6  -1    7.03    0.58 
  13   6  -1    6.54    0.64 
  13   6  -1    6.00    1.47 
 -13  -6   1    6.32    0.60 
 -13  -6   1    6.67    0.45 
  12   6  -1    2.04    0.53 
  12   6  -1    2.04    1.37 
  12   6  -1    1.61    0.60 
 -12  -6   1    1.95    0.40 
 -12  -6   1    1.75    0.54 
 -12  -6   1    2.15    0.44 
  11   6  -1   -0.71    0.52 
  11   6  -1   -0.48    0.47 
  11   6  -1   -0.74    1.26 
 -11  -6   1    0.06    0.52 
 -11  -6   1   -0.19    0.38 
 -11  -6   1    0.02    0.41 
  10   6  -1    0.54    0.44 
  10   6  -1    1.01    0.52 
  10   6  -1    0.94    1.20 
 -10  -6   1    1.40    0.42 
 -10  -6   1    1.41    0.52 
 -10  -6   1    1.17    0.36 
   9   6  -1   12.61    0.52 
   9   6  -1   14.35    1.19 
   9   6  -1   12.85    0.48 
  -9  -6   1   12.97    0.40 
  -9  -6   1   13.34    0.52 
  -9  -6   1   13.20    0.45 
   8   6  -1    6.14    0.44 
   8   6  -1    6.96    0.39 
   8   6  -1    7.53    0.39 
   8   6  -1    7.22    0.98 
  -8  -6   1    6.88    0.38 
  -8  -6   1    6.81    0.42 
  -8  -6   1    7.15    0.31 
  -8  -6   1    6.89    0.32 
   7   6  -1    8.38    0.39 
   7   6  -1    8.95    0.33 
   7   6  -1    8.83    0.87 
   7   6  -1    8.67    0.34 
  -7  -6   1    9.00    0.38 
  -7  -6   1    8.43    0.34 
  -7  -6   1    8.30    0.32 
  -7  -6   1    9.47    0.29 
  -7  -6   1    9.10    0.44 
   6   6  -1    9.97    0.81 
   6   6  -1    9.56    0.38 
   6   6  -1    8.85    0.30 
   6   6  -1    8.55    0.31 
  -6  -6   1    9.11    0.34 
  -6  -6   1    8.74    0.31 
  -6  -6   1   10.16    0.40 
  -6  -6   1    8.84    0.31 
  -6  -6   1    9.47    0.38 
  -6  -6   1    8.81    0.32 
  -6  -6   1    8.52    0.26 
   5   6  -1   13.41    0.66 
   5   6  -1   13.10    0.52 
   5   6  -1   13.13    0.85 
   5   6  -1   12.73    0.50 
   5   6  -1   13.73    0.63 
  -5  -6   1   12.96    0.50 
  -5  -6   1   13.39    0.53 
  -5  -6   1   13.23    0.53 
  -5  -6   1   13.96    0.54 
  -5  -6   1   13.30    0.62 
  -5  -6   1   14.35    0.60 
  -5  -6   1   14.90    0.77 
   4   6  -1   41.19    0.51 
   4   6  -1   41.24    0.51 
   4   6  -1   41.11    0.56 
   4   6  -1   42.12    0.86 
   4   6  -1   42.51    0.62 
   4   6  -1   41.92    0.69 
  -4  -6   1   40.16    0.55 
  -4  -6   1   41.74    0.56 
  -4  -6   1   40.11    0.62 
  -4  -6   1   41.53    0.76 
  -4  -6   1   42.10    0.63 
  -4  -6   1   40.32    0.53 
  -4  -6   1   41.16    0.57 
   3   6  -1   50.69    0.58 
   3   6  -1   51.69    0.66 
   3   6  -1   53.33    0.68 
   3   6  -1   52.11    0.59 
   3   6  -1   51.68    0.74 
  -3  -6   1   53.21    0.81 
  -3  -6   1   51.55    0.68 
  -3  -6   1   52.40    0.63 
  -3  -6   1   51.72    0.63 
  -3  -6   1   53.76    0.69 
  -3  -6   1   52.73    0.98 
  -3  -6   1   50.62    0.61 
   2   6  -1   22.30    0.65 
   2   6  -1   20.03    0.75 
   2   6  -1   20.53    0.66 
  -2  -6   1   20.93    0.68 
  -2  -6   1   21.11    0.60 
  -2  -6   1   21.49    0.97 
  -2  -6   1   20.66    0.82 
  -2  -6   1   22.22    0.65 
  -2  -6   1   21.85    0.60 
  -2  -6   1   19.67    0.59 
   1   6  -1   21.68    0.75 
  -1  -6   1   21.12    0.78 
  -1  -6   1   21.42    0.89 
   0   6  -1    1.60    0.33 
   0  -6   1    1.15    0.34 
  -1   6  -1   76.20    1.21 
   1  -6   1   76.01    1.21 
   2  -6   1   19.00    0.42 
   2  -6   1   19.21    0.29 
  -3   6  -1   54.36    0.74 
   3  -6   1   54.68    0.82 
   3  -6   1   52.94    0.74 
   3  -6   1   56.05    0.76 
  -4   6  -1   96.00    1.22 
  -4   6  -1   98.12    1.19 
   4  -6   1   97.58    1.27 
   4  -6   1   97.85    1.21 
   4  -6   1   98.44    1.19 
   4  -6   1   96.85    1.23 
  -5   6  -1    2.41    0.19 
  -5   6  -1    2.60    0.27 
  -5   6  -1    2.47    0.15 
   5  -6   1    2.58    0.20 
   5  -6   1    2.13    0.29 
   5  -6   1    2.28    0.29 
  -6   6  -1   17.60    0.23 
  -6   6  -1   17.81    0.30 
  -6   6  -1   18.12    0.33 
   6  -6   1   17.78    0.25 
   6  -6   1   17.22    0.35 
   6  -6   1   17.68    0.35 
  -7   6  -1   14.83    0.38 
  -7   6  -1   14.42    0.25 
   7  -6   1   14.25    0.26 
   7  -6   1   13.83    0.38 
   7  -6   1   14.44    0.41 
  -8   6  -1    3.05    0.41 
  -8   6  -1    2.55    0.26 
   8  -6   1    1.36    0.43 
   8  -6   1    1.88    0.45 
   8  -6   1    1.91    0.28 
  -9   6  -1    1.70    0.49 
   9  -6   1    0.76    0.52 
   9  -6   1    0.52    0.49 
   9  -6   1    1.68    0.33 
 -10   6  -1    8.19    0.50 
  10  -6   1    7.64    0.34 
  10  -6   1    7.49    0.55 
  10  -6   1    7.18    0.51 
 -11   6  -1    0.45    0.38 
 -11   6  -1    2.34    0.61 
  11  -6   1    0.74    0.40 
  11  -6   1    0.83    0.61 
  11  -6   1    0.56    0.59 
 -12   6  -1    6.33    0.61 
 -12   6  -1    5.86    0.40 
  12  -6   1    6.42    0.62 
  12  -6   1    6.39    0.39 
  12  -6   1    6.85    0.73 
 -13   6  -1    2.14    0.64 
  13  -6   1    1.90    0.73 
  13  -6   1    1.96    0.67 
 -14   6  -1    0.76    0.70 
  14  -6   1    0.93    0.79 
  14  -6   1   -0.65    0.68 
 -15   6  -1    0.74    0.74 
  15  -6   1    0.96    1.01 
  15  -6   1    0.36    0.72 
 -16   6  -1    6.40    0.82 
  16  -6   1    7.02    0.86 
  17  -6   1    0.57    0.86 
  18  -6   1    2.07    0.98 
  18   5  -1    6.17    0.81 
  18   5  -1    1.48    2.05 
  17   5  -1    1.15    0.77 
  17   5  -1   -2.17    1.81 
 -17  -5   1    0.71    0.55 
  16   5  -1    3.61    1.72 
  16   5  -1    5.97    0.71 
 -16  -5   1    5.69    0.52 
  15   5  -1   -1.09    1.56 
  15   5  -1    0.59    0.63 
 -15  -5   1    1.80    0.52 
  14   5  -1    3.88    0.59 
  14   5  -1    2.37    1.51 
  14   5  -1    5.59    0.76 
 -14  -5   1    4.55    0.60 
 -14  -5   1    4.79    0.46 
  13   5  -1    2.89    0.32 
  13   5  -1    2.15    1.50 
  13   5  -1    1.86    0.61 
  13   5  -1    2.73    0.58 
 -13  -5   1    2.85    0.59 
 -13  -5   1    2.18    0.44 
  12   5  -1    0.27    0.58 
  12   5  -1   -0.14    1.37 
  12   5  -1    0.70    0.31 
  12   5  -1   -0.02    0.52 
 -12  -5   1    1.13    0.41 
 -12  -5   1    0.22    0.43 
 -12  -5   1    0.70    0.55 
  11   5  -1   10.87    0.59 
  11   5  -1   11.17    0.35 
  11   5  -1   11.31    0.53 
  11   5  -1   10.95    1.33 
 -11  -5   1   10.61    0.54 
 -11  -5   1   10.97    0.43 
 -11  -5   1   10.95    0.41 
  10   5  -1    7.61    1.23 
  10   5  -1    7.50    0.50 
  10   5  -1    7.91    0.47 
 -10  -5   1    8.51    0.42 
 -10  -5   1    8.48    0.38 
 -10  -5   1    7.87    0.51 
   9   5  -1    6.94    0.46 
   9   5  -1    7.75    0.28 
   9   5  -1    7.50    1.07 
   9   5  -1    7.23    0.41 
  -9  -5   1    7.39    0.44 
  -9  -5   1    7.66    0.37 
  -9  -5   1    7.36    0.31 
   8   5  -1   20.41    0.44 
   8   5  -1   19.85    0.33 
   8   5  -1   20.86    0.51 
   8   5  -1   21.23    1.03 
   8   5  -1   19.59    0.42 
  -8  -5   1   21.25    0.34 
  -8  -5   1   20.26    0.35 
  -8  -5   1   20.20    0.40 
  -8  -5   1   21.05    0.48 
   7   5  -1   17.38    0.35 
   7   5  -1   17.67    0.35 
   7   5  -1   17.09    0.39 
   7   5  -1   18.53    0.86 
  -7  -5   1   17.98    0.28 
  -7  -5   1   17.88    0.39 
  -7  -5   1   17.90    0.34 
  -7  -5   1   18.19    0.29 
   6   5  -1   16.87    0.42 
   6   5  -1   16.94    0.47 
   6   5  -1   15.85    0.41 
   6   5  -1   18.21    0.91 
  -6  -5   1   16.62    0.37 
  -6  -5   1   16.22    0.46 
  -6  -5   1   17.50    0.44 
  -6  -5   1   17.95    0.48 
  -6  -5   1   16.94    0.43 
  -6  -5   1   16.38    0.42 
   5   5  -1    2.53    0.27 
   5   5  -1    3.03    0.28 
   5   5  -1    3.12    0.69 
   5   5  -1    2.81    0.32 
  -5  -5   1    3.36    0.29 
  -5  -5   1    3.18    0.30 
  -5  -5   1    2.86    0.28 
  -5  -5   1    2.71    0.23 
  -5  -5   1    3.15    0.32 
  -5  -5   1    3.67    0.30 
  -5  -5   1    3.35    0.34 
   4   5  -1   11.01    0.57 
   4   5  -1    9.45    0.41 
   4   5  -1    9.86    0.43 
   4   5  -1   10.24    0.42 
   4   5  -1   11.33    0.79 
   4   5  -1   10.56    0.41 
  -4  -5   1   11.46    0.64 
  -4  -5   1   10.17    0.41 
  -4  -5   1   11.06    0.83 
  -4  -5   1    9.74    0.44 
  -4  -5   1    9.61    0.45 
  -4  -5   1    9.68    0.42 
  -4  -5   1   11.26    0.52 
  -4  -5   1   10.34    0.44 
   3   5  -1    0.13    0.26 
   3   5  -1    0.48    0.26 
   3   5  -1    0.27    0.19 
   3   5  -1   -0.28    0.58 
   3   5  -1    0.71    0.17 
   3   5  -1    0.66    0.24 
  -3  -5   1    0.46    0.23 
  -3  -5   1    0.38    0.26 
  -3  -5   1    0.85    0.29 
  -3  -5   1    0.79    0.29 
  -3  -5   1    0.77    0.17 
  -3  -5   1    0.26    0.29 
  -3  -5   1    0.28    0.64 
  -3  -5   1    0.96    0.22 
   2   5  -1  267.76    4.77 
   2   5  -1  273.80    4.76 
   2   5  -1  270.89    4.81 
  -2  -5   1  271.20    4.82 
  -2  -5   1  272.99    4.76 
  -2  -5   1  273.39    4.88 
  -2  -5   1  266.99    4.74 
  -2  -5   1  272.85    4.75 
  -2  -5   1  269.69    4.75 
  -2  -5   1  271.71    4.78 
   1   5  -1  188.17    2.81 
  -1  -5   1  189.28    2.81 
  -1  -5   1  190.17    2.86 
   0   5  -1   33.31    0.70 
   0  -5   1   33.40    0.72 
  -1   5  -1    4.21    0.35 
   1  -5   1    3.09    0.34 
  -2   5  -1   84.29    1.54 
   2  -5   1   84.29    1.59 
   2  -5   1   83.59    1.54 
  -3   5  -1    3.33    0.21 
   3  -5   1    2.68    0.26 
   3  -5   1    3.41    0.21 
   3  -5   1    3.67    0.34 
   3  -5   1    2.87    0.25 
  -4   5  -1   52.60    0.62 
  -4   5  -1   52.58    0.71 
  -4   5  -1   53.42    0.65 
   4  -5   1   53.12    0.70 
   4  -5   1   53.95    0.66 
   4  -5   1   52.10    0.73 
   4  -5   1   54.49    0.73 
  -5   5  -1    4.19    0.28 
  -5   5  -1    4.14    0.20 
  -5   5  -1    4.33    0.18 
   5  -5   1    3.95    0.30 
   5  -5   1    3.83    0.30 
   5  -5   1    4.18    0.21 
   5  -5   1    3.98    0.29 
  -6   5  -1   37.95    0.71 
  -6   5  -1   35.47    0.59 
   6  -5   1   36.03    0.67 
   6  -5   1   35.24    0.59 
   6  -5   1   37.17    0.73 
   6  -5   1   35.91    0.61 
  -7   5  -1    3.54    0.12 
  -7   5  -1    3.50    0.36 
   7  -5   1    3.55    0.26 
   7  -5   1    3.27    0.29 
   7  -5   1    2.93    0.39 
   7  -5   1    2.46    0.36 
  -8   5  -1    0.62    0.39 
   8  -5   1    0.47    0.30 
   8  -5   1   -0.30    0.41 
   8  -5   1    0.61    0.28 
   8  -5   1    0.06    0.45 
  -9   5  -1   26.22    0.52 
  -9   5  -1   25.98    0.36 
   9  -5   1   26.52    0.37 
   9  -5   1   25.85    0.37 
   9  -5   1   25.18    0.51 
   9  -5   1   24.97    0.56 
 -10   5  -1   -0.48    0.32 
 -10   5  -1    0.55    0.52 
  10  -5   1   -0.51    0.34 
  10  -5   1   -0.57    0.56 
  10  -5   1    0.22    0.30 
 -11   5  -1    1.27    0.54 
 -11   5  -1    0.25    0.36 
  11  -5   1    0.83    0.31 
  11  -5   1    0.16    0.60 
  11  -5   1   -0.11    0.53 
  11  -5   1    0.52    0.38 
 -12   5  -1    5.35    0.63 
 -12   5  -1    4.41    0.40 
  12  -5   1    3.56    0.63 
  12  -5   1    4.93    0.43 
  12  -5   1    3.99    0.45 
  12  -5   1    3.85    0.62 
 -13   5  -1    2.14    0.66 
 -13   5  -1    0.62    0.45 
  13  -5   1    0.41    0.62 
  13  -5   1    0.67    0.70 
  13  -5   1    0.70    0.61 
 -14   5  -1    3.74    0.70 
  14  -5   1    3.23    0.76 
  14  -5   1    3.01    0.74 
 -15   5  -1    3.50    0.74 
  15  -5   1    2.26    0.79 
  15  -5   1    2.74    0.75 
 -16   5  -1    0.42    0.80 
  16  -5   1    1.02    0.94 
  16  -5   1    0.38    0.82 
  17  -5   1    0.95    0.86 
  18  -5   1    3.36    0.91 
  19   4  -1    1.53    0.85 
  18   4  -1    3.98    0.81 
  17   4  -1    3.02    0.75 
 -17  -4   1    1.68    0.57 
  16   4  -1    4.39    0.77 
 -16  -4   1    2.63    0.49 
  15   4  -1    6.83    0.70 
 -15  -4   1    6.68    0.58 
  14   4  -1    0.06    0.59 
  14   4  -1    0.99    0.72 
  14   4  -1    0.11    0.46 
 -14  -4   1    0.50    0.45 
 -14  -4   1    1.58    0.64 
  13   4  -1    3.62    0.56 
  13   4  -1    3.71    0.33 
  13   4  -1    3.48    0.64 
 -13  -4   1    4.08    0.59 
 -13  -4   1    4.17    0.44 
  12   4  -1    4.48    0.33 
  12   4  -1    4.22    0.60 
  12   4  -1    4.13    0.52 
 -12  -4   1    4.35    0.39 
 -12  -4   1    4.75    0.56 
  11   4  -1    0.72    0.50 
  11   4  -1    1.46    0.57 
  11   4  -1    1.15    0.33 
 -11  -4   1    1.08    0.38 
 -11  -4   1    1.63    0.53 
 -11  -4   1    1.55    0.42 
  10   4  -1   23.23    0.53 
  10   4  -1   23.84    0.39 
  10   4  -1   24.17    0.60 
 -10  -4   1   23.81    0.56 
 -10  -4   1   23.49    0.46 
 -10  -4   1   23.39    0.43 
   9   4  -1   18.80    0.54 
   9   4  -1   19.84    0.46 
   9   4  -1   18.20    0.47 
   9   4  -1   19.51    0.37 
   9   4  -1   17.64    0.52 
  -9  -4   1   19.26    0.46 
  -9  -4   1   18.03    0.50 
  -9  -4   1   18.97    0.39 
   8   4  -1   18.52    0.44 
   8   4  -1   18.78    0.94 
   8   4  -1   18.63    0.35 
   8   4  -1   18.78    0.26 
   8   4  -1   18.92    0.38 
   8   4  -1   19.03    0.26 
  -8  -4   1   18.87    0.34 
  -8  -4   1   19.79    0.43 
  -8  -4   1   18.59    0.28 
   7   4  -1    2.16    0.23 
   7   4  -1    1.86    0.23 
   7   4  -1    1.81    0.38 
   7   4  -1    1.92    0.31 
   7   4  -1    2.99    0.84 
   7   4  -1    1.85    0.33 
  -7  -4   1    2.28    0.22 
  -7  -4   1    1.96    0.29 
  -7  -4   1    1.71    0.24 
  -7  -4   1    2.19    0.36 
   6   4  -1   50.68    0.79 
   6   4  -1   50.75    0.78 
   6   4  -1   49.25    0.64 
   6   4  -1   49.32    0.62 
   6   4  -1   51.77    1.01 
   6   4  -1   50.65    0.69 
  -6  -4   1   50.42    0.61 
  -6  -4   1   52.78    0.77 
  -6  -4   1   51.22    0.82 
  -6  -4   1   49.92    0.66 
  -6  -4   1   51.58    0.68 
  -6  -4   1   49.83    0.66 
   5   4  -1   88.93    1.45 
   5   4  -1   92.41    1.43 
   5   4  -1   89.62    1.58 
   5   4  -1   89.00    1.41 
   5   4  -1   88.82    1.37 
  -5  -4   1   87.42    1.37 
  -5  -4   1   91.75    1.42 
  -5  -4   1   87.93    1.35 
  -5  -4   1   87.54    1.35 
  -5  -4   1   89.86    1.37 
  -5  -4   1   87.85    1.46 
   4   4  -1    1.51    0.22 
   4   4  -1    2.00    0.69 
   4   4  -1    1.17    0.26 
   4   4  -1    2.34    0.33 
   4   4  -1    1.35    0.27 
   4   4  -1    1.22    0.25 
  -4  -4   1    1.68    0.28 
  -4  -4   1    0.82    0.26 
  -4  -4   1    1.13    0.21 
  -4  -4   1    1.15    0.25 
  -4  -4   1    1.84    0.32 
  -4  -4   1    1.21    0.26 
  -4  -4   1    2.30    0.32 
   3   4  -1  171.15    1.99 
   3   4  -1  173.13    1.85 
   3   4  -1  172.20    1.85 
   3   4  -1  174.07    1.92 
   3   4  -1  171.73    1.86 
   3   4  -1  169.46    1.88 
  -3  -4   1  172.86    1.87 
  -3  -4   1  173.79    1.89 
  -3  -4   1  169.77    1.88 
  -3  -4   1  173.92    1.86 
  -3  -4   1  172.29    1.85 
  -3  -4   1  171.70    1.86 
  -3  -4   1  173.45    1.93 
  -3  -4   1  171.18    2.01 
   2   4  -1   21.36    0.38 
   2   4  -1   21.14    0.47 
   2   4  -1   21.37    0.31 
   2   4  -1   21.51    0.31 
  -2  -4   1   20.99    0.32 
  -2  -4   1   21.70    0.34 
  -2  -4   1   22.99    0.66 
  -2  -4   1   21.76    0.50 
  -2  -4   1   20.79    0.39 
  -2  -4   1   21.70    0.34 
   1   4  -1  196.50    4.27 
   1   4  -1  195.08    4.25 
  -1  -4   1  198.85    4.27 
  -1  -4   1  203.34    4.31 
  -1  -4   1  198.36    4.25 
   0   4  -1   32.37    0.56 
   0  -4   1   32.44    0.56 
  -1   4  -1   33.80    0.58 
   1  -4   1   33.20    0.64 
   1  -4   1   33.59    0.57 
  -2   4  -1  482.11    7.09 
   2  -4   1  486.03    7.12 
   2  -4   1  491.48    7.09 
   2  -4   1  476.58    7.09 
   2  -4   1  480.57    7.10 
  -3   4  -1   26.96    0.36 
  -3   4  -1   26.25    0.24 
  -3   4  -1   27.44    0.25 
   3  -4   1   27.79    0.38 
   3  -4   1   26.94    0.33 
   3  -4   1   26.28    0.24 
   3  -4   1   26.84    0.33 
  -4   4  -1    5.65    0.25 
  -4   4  -1    5.47    0.17 
  -4   4  -1    6.28    0.18 
   4  -4   1    5.36    0.18 
   4  -4   1    5.22    0.26 
   4  -4   1    5.69    0.25 
   4  -4   1    5.24    0.26 
  -5   4  -1   73.50    0.88 
  -5   4  -1   73.35    0.80 
   5  -4   1   73.43    0.82 
   5  -4   1   72.43    0.81 
   5  -4   1   72.78    0.91 
   5  -4   1   73.26    0.86 
  -6   4  -1    0.51    0.31 
  -6   4  -1    0.30    0.04 
   6  -4   1    0.25    0.22 
   6  -4   1    0.41    0.24 
   6  -4   1   -0.36    0.34 
   6  -4   1   -0.24    0.31 
  -7   4  -1   79.21    0.85 
   7  -4   1   78.67    0.84 
   7  -4   1   77.82    0.92 
   7  -4   1   80.21    0.74 
   7  -4   1   80.13    0.77 
  -8   4  -1  105.45    1.15 
  -8   4  -1  110.19    1.26 
   8  -4   1  107.36    1.17 
   8  -4   1  107.24    1.23 
   8  -4   1  110.74    1.31 
   8  -4   1  105.73    1.13 
  -9   4  -1    4.56    0.47 
  -9   4  -1    4.04    0.34 
   9  -4   1    4.52    0.31 
   9  -4   1    3.75    0.47 
   9  -4   1    3.21    0.53 
   9  -4   1    4.00    0.34 
 -10   4  -1   55.33    0.83 
 -10   4  -1   54.67    1.01 
  10  -4   1   55.37    1.07 
  10  -4   1   53.56    0.71 
  10  -4   1   54.71    0.82 
  10  -4   1   52.39    0.91 
 -11   4  -1    2.19    0.55 
 -11   4  -1    1.77    0.35 
  11  -4   1    1.98    0.37 
  11  -4   1    1.41    0.54 
  11  -4   1    2.17    0.63 
  11  -4   1    1.09    0.27 
 -12   4  -1   39.36    0.55 
  12  -4   1   39.11    0.86 
  12  -4   1   38.35    0.73 
  12  -4   1   39.31    0.58 
 -13   4  -1    9.17    0.67 
 -13   4  -1    7.73    0.47 
  13  -4   1    7.93    0.71 
  13  -4   1    8.05    0.49 
  13  -4   1    8.21    0.78 
 -14   4  -1   22.35    0.78 
  14  -4   1   21.04    0.87 
  14  -4   1   20.43    0.75 
 -15   4  -1    1.30    0.73 
  15  -4   1    0.53    0.72 
  15  -4   1    1.62    0.79 
 -16   4  -1    2.07    0.76 
  16  -4   1    1.43    0.87 
  16  -4   1    0.81    0.73 
 -17   4  -1    0.64    0.80 
  17  -4   1    0.99    1.11 
  17  -4   1    1.39    0.85 
  18  -4   1    3.69    0.91 
  19   3  -1    0.72    0.86 
  18   3  -1    1.19    0.81 
  17   3  -1    1.41    0.77 
  16   3  -1    0.59    0.71 
 -16  -3   1   -0.20    0.47 
  15   3  -1   14.53    0.72 
 -15  -3   1   14.45    0.53 
 -15  -3   1   14.22    0.73 
  14   3  -1   -0.35    0.62 
  14   3  -1    0.53    0.72 
 -14  -3   1    0.69    0.64 
 -14  -3   1    0.08    0.45 
  13   3  -1    0.63    0.39 
  13   3  -1    0.66    0.59 
  13   3  -1    0.41    0.66 
 -13  -3   1    0.98    0.60 
 -13  -3   1    0.75    0.45 
  12   3  -1   -0.23    0.35 
  12   3  -1   -0.47    0.52 
  12   3  -1    0.06    0.62 
 -12  -3   1   -0.32    0.38 
 -12  -3   1    0.38    0.54 
  11   3  -1   12.17    0.60 
  11   3  -1   11.75    0.54 
  11   3  -1   12.37    0.38 
  11   3  -1   12.11    0.38 
 -11  -3   1   11.98    0.40 
 -11  -3   1   12.34    0.54 
  10   3  -1    0.27    0.32 
  10   3  -1   -0.06    0.45 
  10   3  -1   -0.05    0.31 
  10   3  -1    0.17    0.51 
 -10  -3   1   -0.50    0.36 
 -10  -3   1    0.51    0.49 
 -10  -3   1    0.44    0.34 
   9   3  -1    7.37    0.47 
   9   3  -1    7.78    0.37 
   9   3  -1    8.08    0.29 
   9   3  -1    8.60    0.31 
   9   3  -1    7.47    0.40 
  -9  -3   1    7.93    0.36 
  -9  -3   1    8.10    0.44 
  -9  -3   1    8.47    0.32 
   8   3  -1   44.83    0.69 
   8   3  -1   45.56    0.79 
   8   3  -1   43.96    0.82 
   8   3  -1   44.15    0.59 
   8   3  -1   44.73    0.62 
  -8  -3   1   44.50    0.61 
  -8  -3   1   44.65    0.64 
  -8  -3   1   45.65    0.75 
   7   3  -1    2.70    0.35 
   7   3  -1    3.24    0.42 
   7   3  -1    3.02    0.26 
   7   3  -1    2.79    0.32 
   7   3  -1    3.20    0.26 
  -7  -3   1    3.44    0.39 
  -7  -3   1    3.02    0.27 
  -7  -3   1    3.15    0.32 
   6   3  -1   48.78    0.68 
   6   3  -1   47.98    0.52 
   6   3  -1   48.41    0.50 
   6   3  -1   48.58    0.66 
   6   3  -1   48.47    0.55 
  -6  -3   1   49.70    0.66 
  -6  -3   1   47.53    0.52 
  -6  -3   1   48.51    0.54 
  -6  -3   1   49.32    0.60 
  -6  -3   1   48.94    0.44 
   5   3  -1   76.49    1.04 
   5   3  -1   74.23    1.04 
   5   3  -1   75.54    1.27 
   5   3  -1   78.10    1.14 
   5   3  -1   76.95    1.02 
  -5  -3   1   76.73    1.04 
  -5  -3   1   76.37    1.00 
  -5  -3   1   77.54    1.16 
  -5  -3   1   75.46    1.04 
  -5  -3   1   74.66    1.04 
   4   3  -1   53.70    1.26 
   4   3  -1   53.01    1.03 
   4   3  -1   52.86    1.05 
   4   3  -1   53.81    1.10 
   4   3  -1   53.10    1.14 
  -4  -3   1   51.34    1.03 
  -4  -3   1   53.10    1.14 
  -4  -3   1   53.33    1.09 
  -4  -3   1   51.34    1.01 
  -4  -3   1   52.05    1.04 
  -4  -3   1   50.89    1.04 
  -4  -3   1   53.29    1.05 
   3   3  -1  108.96    2.31 
   3   3  -1  104.78    2.26 
   3   3  -1  104.62    2.36 
   3   3  -1  103.15    2.28 
   3   3  -1  107.09    2.26 
  -3  -3   1  107.20    2.31 
  -3  -3   1  107.71    2.26 
  -3  -3   1  108.22    2.26 
  -3  -3   1  107.17    2.27 
  -3  -3   1  102.88    2.28 
  -3  -3   1  105.84    2.26 
  -3  -3   1  104.79    2.36 
   2   3  -1  149.12    2.69 
   2   3  -1  150.27    2.75 
   2   3  -1  151.28    2.68 
   2   3  -1  148.79    2.69 
   2   3  -1  150.73    2.68 
   2   3  -1  149.23    2.72 
  -2  -3   1  152.18    2.68 
  -2  -3   1  148.03    2.68 
  -2  -3   1  148.85    2.68 
  -2  -3   1  147.65    2.69 
  -2  -3   1  149.68    2.75 
  -2  -3   1  149.75    2.69 
  -2  -3   1  147.53    2.72 
   1   3  -1   98.20    1.43 
   1   3  -1   92.46    1.39 
   1   3  -1   95.90    1.40 
  -1  -3   1   95.35    1.38 
  -1  -3   1   94.02    1.38 
  -1  -3   1   97.31    1.41 
  -1  -3   1   98.27    1.43 
   0  -3   1   51.27    1.46 
   0  -3   1   48.22    1.43 
  -1   3  -1    2.13    0.19 
   1  -3   1    2.23    0.19 
   1  -3   1    2.65    0.25 
  -2   3  -1    7.08    0.39 
  -2   3  -1    8.70    0.41 
   2  -3   1    8.09    0.43 
  -3   3  -1  345.25    6.99 
  -3   3  -1  333.84    6.99 
  -3   3  -1  342.81    7.00 
   3  -3   1  338.79    7.00 
   3  -3   1  349.23    7.01 
   3  -3   1  338.87    6.99 
   3  -3   1  348.67    7.00 
  -4   3  -1   37.94    0.50 
  -4   3  -1   38.76    0.41 
   4  -3   1   37.58    0.41 
   4  -3   1   37.86    0.52 
   4  -3   1   38.37    0.43 
   4  -3   1   39.05    0.46 
  -5   3  -1   17.84    0.22 
  -5   3  -1   17.52    0.27 
   5  -3   1   16.90    0.31 
   5  -3   1   17.99    0.21 
   5  -3   1   17.99    0.24 
   5  -3   1   17.02    0.30 
  -6   3  -1   13.95    0.41 
  -6   3  -1   13.50    0.31 
   6  -3   1   13.54    0.32 
   6  -3   1   13.34    0.41 
   6  -3   1   13.56    0.34 
   6  -3   1   13.30    0.44 
  -7   3  -1    7.73    0.30 
   7  -3   1    8.49    0.43 
   7  -3   1    8.72    0.32 
   7  -3   1    8.01    0.32 
   7  -3   1    9.65    0.49 
  -8   3  -1   75.63    1.37 
  -8   3  -1   78.29    1.47 
   8  -3   1   76.58    1.38 
   8  -3   1   79.66    1.52 
   8  -3   1   74.65    1.43 
   8  -3   1   73.33    1.33 
  -9   3  -1   22.56    0.75 
   9  -3   1   23.07    0.85 
   9  -3   1   20.13    0.63 
   9  -3   1   22.98    0.73 
  10  -3   1   -0.24    0.26 
 -11   3  -1   41.85    1.07 
 -11   3  -1   42.97    0.89 
  11  -3   1   43.55    0.90 
  11  -3   1   41.34    0.99 
  11  -3   1   43.43    1.16 
 -12   3  -1   19.95    0.67 
 -12   3  -1   18.42    0.44 
  12  -3   1   18.70    0.44 
  12  -3   1   19.19    0.78 
  12  -3   1   18.66    0.66 
 -13   3  -1    3.09    0.45 
 -13   3  -1    3.64    0.66 
  13  -3   1    2.87    0.75 
  13  -3   1    2.80    0.62 
  13  -3   1    3.99    0.46 
 -14   3  -1    1.03    0.66 
 -14   3  -1    0.24    0.45 
  14  -3   1    0.92    0.70 
  14  -3   1    0.63    0.57 
  14  -3   1    0.10    0.76 
 -15   3  -1    0.58    0.73 
  15  -3   1    0.54    0.71 
  15  -3   1    1.25    0.80 
 -16   3  -1    2.64    0.79 
  16  -3   1    2.12    0.95 
  16  -3   1    1.95    0.75 
 -17   3  -1    3.22    0.79 
  17  -3   1    3.38    0.86 
  18  -3   1    1.02    0.91 
  19  -3   1    0.49    0.93 
  19   2  -1    0.75    0.82 
  18   2  -1    1.95    0.82 
  17   2  -1    0.66    0.77 
  16   2  -1    0.44    0.68 
 -16  -2   1    0.72    0.50 
  15   2  -1    5.88    0.81 
  15   2  -1    4.87    0.65 
 -15  -2   1    5.82    0.49 
 -15  -2   1    5.57    0.66 
  14   2  -1    0.41    0.73 
  14   2  -1    0.73    0.61 
 -14  -2   1    0.85    0.61 
 -14  -2   1    0.37    0.44 
  13   2  -1   13.72    0.66 
  13   2  -1   14.97    0.75 
 -13  -2   1   14.51    0.49 
 -13  -2   1   14.22    0.64 
  12   2  -1    0.98    0.52 
  12   2  -1    0.91    0.63 
 -12  -2   1    1.75    0.58 
 -12  -2   1    1.07    0.39 
  11   2  -1   14.33    0.60 
  11   2  -1   13.99    0.52 
  11   2  -1   14.39    0.36 
 -11  -2   1   14.55    0.38 
 -11  -2   1   15.01    0.56 
  10   2  -1   -0.08    0.31 
  10   2  -1   -0.08    0.52 
  10   2  -1   -0.65    0.43 
 -10  -2   1   -0.03    0.36 
 -10  -2   1    0.01    0.33 
 -10  -2   1    0.33    0.48 
   9   2  -1    3.92    0.42 
   9   2  -1    3.90    0.30 
   9   2  -1    3.77    0.39 
   9   2  -1    3.81    0.49 
  -9  -2   1    3.95    0.44 
  -9  -2   1    3.39    0.34 
  -9  -2   1    4.10    0.32 
   8   2  -1    0.15    0.37 
   8   2  -1    0.25    0.34 
   8   2  -1   -0.76    0.43 
   8   2  -1    0.40    0.26 
  -8  -2   1    0.51    0.40 
  -8  -2   1   -0.19    0.30 
  -8  -2   1    0.25    0.27 
   7   2  -1    0.42    0.31 
   7   2  -1   -0.14    0.33 
   7   2  -1    0.22    0.23 
   7   2  -1   -0.48    0.38 
  -7  -2   1   -0.18    0.36 
  -7  -2   1    0.04    0.24 
  -7  -2   1    0.61    0.29 
   6   2  -1    8.81    0.39 
   6   2  -1    9.68    0.42 
   6   2  -1    9.80    0.45 
   6   2  -1    9.24    0.32 
  -6  -2   1    8.85    0.33 
  -6  -2   1   10.30    0.44 
  -6  -2   1   10.26    0.55 
  -6  -2   1    9.72    0.38 
   5   2  -1   77.11    0.79 
   5   2  -1   76.62    0.78 
   5   2  -1   77.94    0.91 
   5   2  -1   76.06    0.82 
   5   2  -1   77.28    0.89 
  -5  -2   1   77.25    0.87 
  -5  -2   1   76.92    0.80 
  -5  -2   1   76.43    0.73 
  -5  -2   1   76.05    0.79 
  -5  -2   1   76.67    0.81 
   4   2  -1  102.88    1.46 
   4   2  -1  100.85    1.51 
   4   2  -1  103.19    1.54 
   4   2  -1  102.99    1.46 
   4   2  -1  100.99    1.47 
  -4  -2   1   99.80    1.50 
  -4  -2   1  102.34    1.47 
  -4  -2   1  102.29    1.47 
  -4  -2   1  103.14    1.43 
  -4  -2   1  102.03    1.46 
   3   2  -1   35.55    0.48 
   3   2  -1   35.74    0.47 
   3   2  -1   34.96    0.56 
   3   2  -1   36.72    0.52 
   3   2  -1   35.97    0.64 
  -3  -2   1   36.88    0.52 
  -3  -2   1   34.59    0.46 
  -3  -2   1   34.92    0.45 
  -3  -2   1   34.97    0.48 
  -3  -2   1   35.16    0.56 
  -3  -2   1   36.13    0.48 
   2   2  -1    4.51    0.33 
   2   2  -1    3.99    0.24 
   2   2  -1    4.14    0.18 
   2   2  -1    4.27    0.18 
   2   2  -1    4.06    0.20 
  -2  -2   1    3.49    0.28 
  -2  -2   1    4.54    0.20 
  -2  -2   1    4.01    0.19 
  -2  -2   1    4.14    0.18 
  -2  -2   1    4.17    0.26 
   1   2  -1    9.60    0.09 
  -1  -2   1    9.52    0.12 
   0   2  -1   15.78    0.02 
   0  -2   1    0.14    0.02 
  -2   2  -1   39.91    0.74 
   2  -2   1   39.20    0.74 
   2  -2   1   39.64    0.73 
  -3   2  -1   10.79    0.31 
  -3   2  -1   10.20    0.37 
   3  -2   1   10.37    0.38 
   3  -2   1   10.53    0.31 
   3  -2   1   10.71    0.34 
  -4   2  -1   -0.14    0.19 
  -4   2  -1   -0.16    0.11 
  -4   2  -1   -0.27    0.25 
   4  -2   1   -0.25    0.16 
   4  -2   1   -0.27    0.26 
  -5   2  -1    5.64    0.26 
  -5   2  -1    5.64    0.18 
  -5   2  -1    5.97    0.21 
   5  -2   1    5.41    0.30 
   5  -2   1    6.01    0.19 
   5  -2   1    5.55    0.28 
  -6   2  -1   12.82    0.37 
  -6   2  -1   13.26    0.29 
   6  -2   1   13.22    0.30 
   6  -2   1   13.65    0.32 
   6  -2   1   12.35    0.38 
   6  -2   1   13.12    0.28 
   6  -2   1   12.82    0.41 
  -7   2  -1    5.55    0.45 
  -7   2  -1    6.29    0.43 
   7  -2   1    4.98    0.45 
   7  -2   1    7.41    0.48 
   7  -2   1    5.16    0.49 
   7  -2   1    5.84    0.33 
  -8   2  -1  244.50    3.55 
  -8   2  -1  243.70    3.50 
   8  -2   1  248.21    3.59 
   8  -2   1  242.39    3.54 
   8  -2   1  236.58    3.46 
   8  -2   1  246.62    3.51 
 -10   2  -1   57.97    1.59 
 -10   2  -1   53.53    1.68 
  10  -2   1   57.44    1.59 
  10  -2   1   57.04    1.76 
  10  -2   1   53.57    1.64 
 -11   2  -1    0.65    0.37 
 -11   2  -1    0.18    0.53 
  11  -2   1    0.19    0.51 
  11  -2   1    1.90    0.38 
  11  -2   1    0.18    0.62 
 -12   2  -1   58.83    1.13 
 -12   2  -1   59.92    0.94 
  12  -2   1   60.57    0.94 
  12  -2   1   58.85    1.24 
  12  -2   1   56.95    1.03 
 -13   2  -1    3.54    0.66 
 -13   2  -1    2.39    0.45 
  13  -2   1    1.99    0.67 
  13  -2   1    3.25    0.49 
  13  -2   1    2.50    0.76 
 -14   2  -1    3.17    0.70 
 -14   2  -1    2.85    0.48 
  14  -2   1    2.64    0.69 
  14  -2   1    2.66    0.76 
  14  -2   1    3.04    0.47 
 -15   2  -1    2.18    0.70 
  15  -2   1    1.42    0.86 
  15  -2   1    1.52    0.71 
 -16   2  -1    9.33    0.74 
  16  -2   1    9.30    0.87 
  16  -2   1    9.55    0.75 
  17  -2   1    3.41    0.85 
  18  -2   1    2.53    0.88 
  19  -2   1    0.59    0.85 
  19   1  -1    4.06    0.85 
  18   1  -1    6.39    0.82 
  17   1  -1    2.00    0.77 
  16   1  -1    0.68    0.71 
  15   1  -1    2.40    0.67 
  15   1  -1    2.66    0.84 
 -15  -1   1    2.92    0.65 
 -15  -1   1    2.52    0.46 
  14   1  -1    0.20    0.64 
  14   1  -1    0.53    0.75 
 -14  -1   1    0.56    0.44 
 -14  -1   1    1.02    0.65 
  13   1  -1    3.50    0.70 
  13   1  -1    3.16    0.56 
 -13  -1   1    3.89    0.42 
 -13  -1   1    4.36    0.60 
  12   1  -1    1.09    0.62 
  12   1  -1    0.72    0.54 
  12   1  -1    1.22    0.36 
 -12  -1   1    0.51    0.38 
 -12  -1   1    1.44    0.55 
  11   1  -1    6.35    0.58 
  11   1  -1    6.02    0.48 
  11   1  -1    6.57    0.34 
 -11  -1   1    6.69    0.51 
 -11  -1   1    6.31    0.36 
  10   1  -1   42.56    0.56 
  10   1  -1   43.36    0.44 
  10   1  -1   43.41    0.64 
 -10  -1   1   44.01    0.47 
 -10  -1   1   43.60    0.58 
   9   1  -1    5.90    0.47 
   9   1  -1    6.11    0.40 
   9   1  -1    6.96    0.30 
  -9  -1   1    6.91    0.31 
  -9  -1   1    7.34    0.44 
  -9  -1   1    7.05    0.34 
   8   1  -1   66.98    1.29 
   8   1  -1   64.25    1.33 
  -8  -1   1   66.93    1.29 
  -8  -1   1   64.84    1.31 
   7   1  -1    1.88    0.32 
   7   1  -1    2.54    0.22 
  -7  -1   1    2.32    0.23 
  -7  -1   1    2.27    0.35 
  -7  -1   1    2.47    0.27 
   6   1  -1   56.97    1.04 
   6   1  -1   56.08    0.97 
   6   1  -1   57.21    0.93 
  -6  -1   1   57.83    0.95 
  -6  -1   1   56.16    1.01 
  -6  -1   1   57.32    0.94 
   5   1  -1   11.01    0.24 
   5   1  -1   10.63    0.20 
   5   1  -1   10.29    0.29 
   5   1  -1   10.72    0.34 
  -5  -1   1   10.89    0.26 
  -5  -1   1   10.45    0.21 
  -5  -1   1   11.60    0.32 
  -5  -1   1   10.90    0.25 
   4   1  -1  257.83    4.25 
   4   1  -1  255.72    4.23 
   4   1  -1  255.94    4.27 
   4   1  -1  252.37    4.26 
   4   1  -1  258.84    4.24 
  -4  -1   1  260.14    4.24 
  -4  -1   1  251.10    4.25 
  -4  -1   1  255.81    4.23 
  -4  -1   1  257.27    4.24 
   3   1  -1  104.24    2.07 
   3   1  -1  104.45    2.11 
   3   1  -1  103.56    2.10 
   3   1  -1  106.80    2.09 
   3   1  -1  107.10    2.08 
  -3  -1   1  106.95    2.08 
  -3  -1   1  101.71    2.05 
  -3  -1   1  106.35    2.08 
  -3  -1   1  102.90    2.09 
  -3  -1   1  105.60    2.08 
   2   1  -1  375.76    4.56 
  -2  -1   1  363.32    4.55 
  -2  -1   1  369.09    4.56 
  -2  -1   1  380.71    4.55 
   1   1  -1   -0.37    0.02 
   1   1  -1   -0.21    0.02 
  -1  -1   1    0.81    0.03 
  -1  -1   1   -0.05    0.03 
  -1  -1   1   -0.11    0.02 
  -1  -1   1    0.26    0.02 
   0   1  -1    0.02    0.00 
   0   1  -1    0.04    0.01 
   0  -1   1    0.04    0.01 
   0  -1   1    0.05    0.01 
  -1   1  -1    0.32    0.02 
  -1   1  -1   -0.02    0.01 
  -1   1  -1    0.23    0.02 
   1  -1   1    0.12    0.02 
   1  -1   1    0.21    0.02 
   1  -1   1   -0.09    0.01 
  -2   1  -1  387.32    4.98 
   2  -1   1  392.92    4.98 
  -3   1  -1    5.67    0.14 
  -3   1  -1    5.14    0.16 
  -3   1  -1    5.70    0.10 
   3  -1   1    6.26    0.13 
   3  -1   1    5.53    0.16 
   3  -1   1    5.21    0.17 
  -4   1  -1   70.62    1.50 
  -4   1  -1   65.72    1.53 
  -4   1  -1   69.72    1.49 
   4  -1   1   66.40    1.53 
   4  -1   1   70.28    1.49 
   4  -1   1   70.60    1.52 
  -5   1  -1    5.40    0.28 
  -5   1  -1    5.18    0.19 
  -5   1  -1    5.19    0.23 
   5  -1   1    4.52    0.27 
   5  -1   1    5.07    0.19 
   5  -1   1    4.96    0.21 
   5  -1   1    5.08    0.31 
  -6   1  -1  111.77    1.42 
  -6   1  -1  111.46    1.36 
   6  -1   1  113.12    1.36 
   6  -1   1  113.46    1.38 
   6  -1   1  112.59    1.44 
   6  -1   1  110.93    1.39 
  -7   1  -1   15.92    0.28 
   7  -1   1   16.42    0.29 
   7  -1   1   17.63    0.46 
   7  -1   1   16.20    0.38 
  -8   1  -1  183.63    2.48 
  -8   1  -1  173.50    2.53 
   8  -1   1  183.94    2.48 
   8  -1   1  177.00    2.51 
   8  -1   1  175.69    2.55 
  -9   1  -1  107.17    1.91 
  -9   1  -1  106.96    1.82 
   9  -1   1  109.31    1.97 
   9  -1   1  103.04    1.86 
   9  -1   1  106.94    1.82 
  10  -1   1    8.40    1.04 
 -11   1  -1   35.88    0.96 
 -11   1  -1   35.55    0.77 
  11  -1   1   37.61    1.06 
  11  -1   1   36.44    0.78 
 -12   1  -1    1.89    0.38 
 -12   1  -1    2.03    0.58 
  12  -1   1    2.06    0.54 
  12  -1   1    2.22    0.38 
  12  -1   1    1.46    0.64 
 -13   1  -1   11.62    0.48 
 -13   1  -1   12.25    0.68 
  13  -1   1   11.32    0.48 
  13  -1   1   10.45    0.73 
  13  -1   1   11.65    0.71 
 -14   1  -1    3.57    0.68 
 -14   1  -1    3.39    0.48 
  14  -1   1    2.36    0.43 
  14  -1   1    2.22    0.77 
  14  -1   1    3.00    0.65 
 -15   1  -1    2.21    0.74 
 -15   1  -1    1.70    0.48 
  15  -1   1    1.50    0.82 
  15  -1   1    2.07    0.70 
  15  -1   1    2.23    0.64 
 -16   1  -1    0.50    0.78 
  16  -1   1    0.91    0.80 
  16  -1   1   -0.43    0.81 
  17  -1   1    0.98    0.80 
  18  -1   1    2.43    0.83 
  19  -1   1    0.88    0.92 
  19   0  -1    1.37    0.89 
  18   0  -1    0.88    0.83 
  17   0  -1    0.08    0.77 
  16   0  -1    4.52    0.74 
 -16   0   1    3.87    0.77 
  15   0  -1    0.79    0.65 
  15   0  -1    1.26    0.79 
 -15   0   1    0.34    0.45 
 -15   0   1    0.97    0.64 
  14   0  -1   -0.15    0.63 
  14   0  -1    0.50    0.80 
 -14   0   1    0.75    0.65 
 -14   0   1    0.33    0.45 
  13   0  -1    1.30    0.59 
  13   0  -1    0.23    0.72 
 -13   0   1    1.11    0.59 
 -13   0   1    2.06    0.44 
  12   0  -1    0.72    0.38 
  12   0  -1   -0.50    0.63 
  12   0  -1    0.53    0.52 
 -12   0   1    0.34    0.39 
 -12   0   1    1.24    0.57 
  11   0  -1    1.86    0.36 
  11   0  -1    1.08    0.49 
  11   0  -1    0.99    0.59 
 -11   0   1    1.85    0.52 
 -11   0   1    2.28    0.38 
  10   0  -1    0.58    0.46 
  10   0  -1    1.60    0.33 
  10   0  -1    1.19    0.56 
 -10   0   1    1.22    0.49 
 -10   0   1    1.08    0.33 
   9   0  -1   67.01    0.72 
   9   0  -1   66.86    0.72 
   9   0  -1   67.73    0.65 
  -9   0   1   67.49    0.66 
  -9   0   1   67.52    0.81 
   8   0  -1   28.20    0.84 
   8   0  -1   24.56    0.88 
   8   0  -1   25.41    1.01 
  -8   0   1   25.87    0.94 
  -8   0   1   28.27    0.84 
   7   0  -1   14.30    0.35 
   7   0  -1   15.11    0.26 
   7   0  -1   14.30    0.40 
  -7   0   1   15.21    0.30 
  -7   0   1   15.29    0.27 
  -7   0   1   14.60    0.37 
   6   0  -1  125.09    1.33 
   6   0  -1  127.30    1.39 
   6   0  -1  124.97    1.30 
   6   0  -1  127.65    1.42 
  -6   0   1  124.33    1.30 
  -6   0   1  125.21    1.31 
  -6   0   1  127.68    1.37 
   5   0  -1   57.01    0.73 
   5   0  -1   55.86    0.76 
   5   0  -1   56.20    0.84 
   5   0  -1   56.40    0.72 
  -5   0   1   56.98    0.73 
  -5   0   1   56.28    0.80 
  -5   0   1   55.66    0.72 
  -5   0   1   55.98    0.73 
   4   0  -1   11.21    0.17 
   4   0  -1   10.90    0.20 
   4   0  -1   11.30    0.29 
   4   0  -1   10.57    0.23 
  -4   0   1   11.55    0.28 
  -4   0   1   11.13    0.18 
  -4   0   1   11.40    0.21 
  -4   0   1   10.78    0.22 
   3   0  -1    0.37    0.10 
   3   0  -1    0.18    0.17 
   3   0  -1    0.36    0.12 
   3   0  -1    0.28    0.15 
  -3   0   1    0.51    0.17 
  -3   0   1    0.19    0.11 
  -3   0   1    0.45    0.13 
  -3   0   1    0.49    0.14 
   2   0  -1    2.55    0.10 
   2   0  -1    2.75    0.08 
   1   0  -1   -0.19    0.01 
   1   0  -1   -0.21    0.02 
  -1   0   1   -0.11    0.03 
  -1   0   1   -0.18    0.02 
   0   0  -1    0.05    0.00 
   0   0  -1    0.02    0.00 
   0   0   1    0.09    0.01 
   0   0   1    0.05    0.00 
  -1   0  -1    0.21    0.01 
  -1   0  -1   -0.04    0.01 
  -1   0  -1    0.12    0.01 
   1   0   1    0.04    0.01 
   1   0   1    0.05    0.02 
   1   0   1    0.11    0.02 
   2   0   1   58.31    0.85 
  -3   0  -1   18.18    0.43 
   3   0   1   18.83    0.42 
   3   0   1   16.95    0.46 
   3   0   1   18.73    0.44 
  -4   0  -1   93.82    2.71 
  -4   0  -1   95.57    2.69 
  -4   0  -1   92.27    2.68 
   4   0   1   92.34    2.68 
   4   0   1   94.63    2.71 
   4   0   1   94.43    2.68 
   4   0   1   95.10    2.69 
  -5   0  -1    7.62    0.26 
  -5   0  -1    7.66    0.21 
  -5   0  -1    8.20    0.30 
   5   0   1    7.34    0.21 
   5   0   1    6.96    0.29 
   5   0   1    7.73    0.23 
   5   0   1    8.37    0.34 
  -6   0  -1   16.28    0.34 
  -6   0  -1   16.52    0.41 
   6   0   1   16.74    0.43 
   6   0   1   16.54    0.45 
   6   0   1   16.93    0.38 
   6   0   1   16.66    0.33 
  -7   0  -1    0.04    0.33 
  -7   0  -1    0.73    0.24 
   7   0   1   -0.55    0.32 
   7   0   1    0.81    0.25 
   7   0   1   -0.56    0.38 
  -8   0  -1    1.76    0.29 
  -8   0  -1    1.19    0.39 
   8   0   1    0.36    0.43 
   8   0   1    0.82    0.38 
   8   0   1    1.20    0.27 
  -9   0  -1   46.40    0.86 
  -9   0  -1   44.51    0.98 
   9   0   1   45.51    1.04 
   9   0   1   47.10    0.86 
   9   0   1   43.77    0.92 
 -10   0  -1  155.65    2.06 
 -10   0  -1  164.37    2.00 
  10   0   1  161.18    1.99 
  10   0   1  155.00    2.03 
  10   0   1  159.39    2.13 
 -11   0  -1   28.06    0.59 
 -11   0  -1   28.29    0.42 
  11   0   1   29.26    0.68 
  11   0   1   27.86    0.56 
  11   0   1   28.01    0.42 
 -12   0  -1   19.22    0.42 
 -12   0  -1   18.26    0.56 
  12   0   1   18.28    0.55 
  12   0   1   19.65    0.42 
  12   0   1   17.93    0.67 
 -13   0  -1    5.10    0.61 
 -13   0  -1    5.00    0.41 
  13   0   1    4.45    0.72 
  13   0   1    4.64    0.63 
  13   0   1    4.78    0.42 
 -14   0  -1    0.58    0.43 
 -14   0  -1    0.88    0.61 
  14   0   1    0.86    0.64 
  14   0   1    0.24    0.43 
  14   0   1    0.52    0.71 
 -15   0  -1   -0.02    0.44 
 -15   0  -1   -0.57    0.67 
  15   0   1    0.29    0.71 
  15   0   1   -0.27    0.46 
  15   0   1   -0.14    0.78 
 -16   0  -1   -0.52    0.70 
  16   0   1   -0.05    0.73 
  16   0   1    0.34    0.87 
  17   0   1    4.39    0.80 
  18   0   1    3.23    0.81 
  19   0   1    0.79    0.84 
  19  -1  -1    1.19    0.91 
  18  -1  -1    2.38    0.83 
  17  -1  -1    0.74    0.80 
  16  -1  -1    0.13    0.85 
  16  -1  -1    0.40    0.72 
 -16   1   1    0.52    0.74 
  15  -1  -1   -0.12    0.83 
  15  -1  -1   -0.54    0.65 
 -15   1   1    0.04    0.69 
 -15   1   1   -0.21    0.49 
  14  -1  -1    9.75    0.70 
  14  -1  -1   11.06    0.87 
 -14   1   1   10.20    0.51 
 -14   1   1   10.31    0.67 
  13  -1  -1   -0.52    0.72 
  13  -1  -1   -0.02    0.58 
 -13   1   1    0.46    0.62 
 -13   1   1    0.04    0.42 
  12  -1  -1   -0.31    0.53 
  12  -1  -1    0.01    0.38 
  12  -1  -1   -0.23    0.67 
 -12   1   1   -0.25    0.37 
 -12   1   1    0.02    0.56 
  11  -1  -1    6.01    0.66 
  11  -1  -1    4.99    0.52 
  11  -1  -1    6.28    0.39 
 -11   1   1    5.49    0.39 
 -11   1   1    5.73    0.55 
  10  -1  -1   31.98    0.66 
 -10   1   1   32.59    0.61 
   9  -1  -1   33.05    1.09 
   9  -1  -1   30.33    0.87 
   9  -1  -1   29.16    0.93 
  -9   1   1   33.39    1.02 
  -9   1   1   30.67    0.87 
   8  -1  -1    1.71    0.29 
   8  -1  -1    1.03    0.45 
   8  -1  -1    0.39    0.38 
  -8   1   1    0.76    0.29 
  -8   1   1    1.19    0.41 
   7  -1  -1    1.75    0.40 
   7  -1  -1    1.78    0.30 
   7  -1  -1    2.11    0.24 
  -7   1   1    2.20    0.23 
  -7   1   1    2.71    0.37 
   6  -1  -1   -0.06    0.23 
   6  -1  -1   -0.13    0.21 
   6  -1  -1   -0.89    0.33 
   6  -1  -1   -0.80    0.28 
  -6   1   1   -0.41    0.31 
  -6   1   1   -0.02    0.23 
  -6   1   1   -0.16    0.20 
   5  -1  -1   78.93    0.92 
   5  -1  -1   76.11    0.94 
   5  -1  -1   74.26    0.98 
   5  -1  -1   78.31    0.92 
  -5   1   1   75.09    0.96 
  -5   1   1   78.38    0.92 
  -5   1   1   77.28    0.91 
  -5   1   1   77.29    0.92 
   4  -1  -1   11.54    0.38 
   4  -1  -1   12.07    0.36 
   4  -1  -1   11.30    0.33 
  -4   1   1   12.12    0.37 
  -4   1   1   11.07    0.29 
  -4   1   1   11.62    0.36 
  -4   1   1   13.32    0.47 
   3  -1  -1    7.84    0.34 
   3  -1  -1    7.18    0.27 
   3  -1  -1    6.94    0.26 
   3  -1  -1    6.64    0.26 
  -3   1   1    7.94    0.34 
  -3   1   1    7.47    0.27 
  -3   1   1    6.76    0.27 
  -3   1   1    6.25    0.25 
  -3   1   1    6.69    0.21 
   2  -1  -1  235.19    3.47 
   2  -1  -1  233.59    3.46 
  -2   1   1  228.66    3.47 
  -2   1   1  231.83    3.47 
   1  -1  -1    1.72    0.03 
   1  -1  -1    1.71    0.02 
   1  -1  -1    1.68    0.01 
  -1   1   1    1.72    0.02 
  -1   1   1    1.68    0.02 
  -1   1   1    1.69    0.02 
  -1   1   1    1.70    0.02 
   0  -1  -1   -0.02    0.02 
   0  -1  -1   -0.04    0.00 
   0  -1  -1   -0.09    0.01 
   0   1   1   -0.02    0.00 
   0   1   1   -0.09    0.00 
  -1  -1  -1    3.38    0.01 
  -1  -1  -1    3.37    0.02 
  -1  -1  -1    3.40    0.01 
   1   1   1    3.41    0.03 
   1   1   1    3.35    0.03 
   1   1   1    3.39    0.01 
  -2  -1  -1  263.79    3.62 
   2   1   1  279.20    3.63 
   2   1   1  272.51    3.63 
  -3  -1  -1    9.17    0.43 
  -3  -1  -1    7.57    0.40 
  -3  -1  -1    7.05    0.38 
   3   1   1    7.00    0.38 
   3   1   1    8.06    0.39 
   3   1   1    8.25    0.41 
  -4  -1  -1   43.56    0.49 
  -4  -1  -1   44.57    0.51 
  -4  -1  -1   45.59    0.57 
   4   1   1   43.90    0.52 
   4   1   1   43.67    0.50 
   4   1   1   42.99    0.48 
   4   1   1   45.29    0.58 
  -5  -1  -1   67.65    1.30 
  -5  -1  -1   69.35    1.26 
  -5  -1  -1   69.65    1.25 
   5   1   1   67.30    1.32 
   5   1   1   70.70    1.26 
   5   1   1   68.52    1.27 
   5   1   1   70.09    1.24 
  -6  -1  -1    8.90    0.40 
  -6  -1  -1    9.45    0.26 
  -6  -1  -1    7.56    0.30 
   6   1   1    7.39    0.34 
   6   1   1    8.41    0.32 
   6   1   1    9.38    0.25 
  -7  -1  -1   17.29    0.28 
  -7  -1  -1   17.52    0.39 
   7   1   1   17.61    0.44 
   7   1   1   17.31    0.37 
   7   1   1   17.38    0.28 
  -8  -1  -1    2.08    0.40 
  -8  -1  -1    1.50    0.28 
   8   1   1    1.50    0.39 
   8   1   1    1.23    0.43 
   8   1   1    1.59    0.27 
  -9  -1  -1   20.73    0.40 
  -9  -1  -1   21.18    0.51 
   9   1   1   20.85    0.39 
   9   1   1   20.40    0.49 
   9   1   1   20.63    0.57 
 -10  -1  -1   28.75    0.52 
  10   1   1   29.07    0.59 
  10   1   1   28.81    0.52 
 -11  -1  -1    0.66    0.52 
 -11  -1  -1    0.54    0.36 
  11   1   1    0.11    0.58 
  11   1   1    0.32    0.35 
  11   1   1   -0.12    0.49 
 -12  -1  -1    4.82    0.37 
 -12  -1  -1    5.48    0.57 
  12   1   1    5.20    0.39 
  12   1   1    5.72    0.66 
  12   1   1    4.74    0.54 
 -13  -1  -1    6.85    0.42 
 -13  -1  -1    8.14    0.65 
  13   1   1    6.92    0.43 
  13   1   1    7.31    0.75 
  13   1   1    6.90    0.59 
 -14  -1  -1    0.98    0.43 
 -14  -1  -1    1.54    0.61 
  14   1   1    1.23    0.73 
  14   1   1    1.65    0.49 
  14   1   1    1.41    0.63 
 -15  -1  -1    0.09    0.67 
 -15  -1  -1    0.31    0.47 
  15   1   1   -0.40    0.45 
  15   1   1   -0.14    0.67 
  15   1   1   -0.59    0.75 
 -16  -1  -1    2.34    0.90 
 -16  -1  -1    1.71    0.52 
  16   1   1    2.54    0.73 
  17   1   1    1.63    0.73 
  18   1   1    0.44    0.78 
  19   1   1    1.02    0.90 
  19  -2  -1    0.83    0.95 
  18  -2  -1    4.27    0.86 
  17  -2  -1    1.75    0.82 
  16  -2  -1    7.71    0.91 
  16  -2  -1    8.34    0.75 
 -16   2   1    7.73    0.80 
  15  -2  -1    1.51    0.70 
  15  -2  -1    1.57    0.82 
 -15   2   1    0.41    0.67 
  14  -2  -1   29.05    0.75 
  14  -2  -1   30.30    0.92 
 -14   2   1   30.26    0.56 
 -14   2   1   30.05    0.77 
  13  -2  -1    5.06    0.60 
  13  -2  -1    4.33    0.75 
 -13   2   1    5.04    0.42 
 -13   2   1    5.20    0.62 
  12  -2  -1    6.42    0.67 
  12  -2  -1    6.17    0.56 
  12  -2  -1    7.30    0.40 
 -12   2   1    6.78    0.60 
 -12   2   1    6.73    0.39 
  11  -2  -1    8.47    0.57 
  11  -2  -1    9.95    0.70 
  11  -2  -1    8.69    0.40 
 -11   2   1    8.89    0.61 
 -11   2   1    8.79    0.42 
  10  -2  -1  123.06    1.86 
  10  -2  -1  129.54    1.81 
  10  -2  -1  125.87    1.97 
 -10   2   1  131.50    1.83 
 -10   2   1  122.47    1.92 
   9  -2  -1    0.93    0.44 
   9  -2  -1    0.94    0.32 
   9  -2  -1    1.30    0.52 
  -9   2   1    1.06    0.31 
  -9   2   1    1.43    0.46 
   8  -2  -1  130.87    2.09 
   8  -2  -1  125.61    2.01 
   8  -2  -1  128.89    1.98 
  -8   2   1  128.41    1.98 
  -8   2   1  129.30    2.05 
   7  -2  -1    0.46    0.24 
   7  -2  -1    0.18    0.33 
   7  -2  -1    0.33    0.40 
  -7   2   1    0.84    0.37 
  -7   2   1    0.11    0.24 
   6  -2  -1   25.24    0.49 
   6  -2  -1   23.42    0.52 
   6  -2  -1   24.83    0.39 
   6  -2  -1   25.27    0.50 
   6  -2  -1   24.01    0.53 
  -6   2   1   24.38    0.61 
  -6   2   1   24.35    0.49 
   5  -2  -1   15.94    0.39 
   5  -2  -1   15.94    0.38 
   5  -2  -1   15.32    0.29 
   5  -2  -1   15.09    0.40 
   5  -2  -1   15.30    0.37 
  -5   2   1   15.62    0.35 
  -5   2   1   15.57    0.30 
  -5   2   1   15.51    0.38 
   4  -2  -1  127.33    2.33 
   4  -2  -1  130.45    2.29 
   4  -2  -1  130.17    2.30 
   4  -2  -1  128.81    2.31 
   4  -2  -1  129.63    2.28 
  -4   2   1  127.12    2.32 
  -4   2   1  129.20    2.29 
  -4   2   1  130.28    2.28 
   3  -2  -1    4.04    0.15 
   3  -2  -1    3.88    0.15 
   3  -2  -1    4.10    0.21 
   3  -2  -1    3.82    0.17 
   3  -2  -1    3.86    0.13 
  -3   2   1    4.11    0.15 
   2  -2  -1   19.56    0.15 
   2  -2  -1   19.92    0.17 
   2  -2  -1   19.70    0.14 
  -2   2   1   19.51    0.16 
  -2   2   1   19.76    0.14 
   1  -2  -1    0.05    0.03 
   1  -2  -1    0.12    0.02 
  -1   2   1    0.18    0.05 
   0  -2  -1   -0.19    0.02 
   0  -2  -1    0.33    0.04 
   0   2   1   -0.04    0.01 
  -1  -2  -1    1.06    0.09 
   1   2   1    1.31    0.04 
  -2  -2  -1    1.60    0.15 
  -2  -2  -1    1.35    0.15 
   2   2   1    1.59    0.15 
   2   2   1    1.73    0.31 
   2   2   1    1.46    0.16 
   2   2   1    1.58    0.15 
   2   2   1    2.01    0.16 
   2   2   1    1.51    0.13 
   2   2   1    1.58    0.14 
   2   2   1    1.50    0.14 
  -3  -2  -1   22.90    1.07 
  -3  -2  -1   20.33    1.09 
  -3  -2  -1   22.03    1.08 
  -3  -2  -1   21.90    1.08 
   3   2   1   22.35    1.07 
   3   2   1   22.17    1.07 
   3   2   1   21.91    1.12 
   3   2   1   21.54    1.08 
   3   2   1   22.51    1.07 
   3   2   1   20.93    1.10 
  -4  -2  -1  302.78    5.18 
  -4  -2  -1  307.54    5.19 
  -4  -2  -1  302.43    5.20 
  -4  -2  -1  303.51    5.19 
   4   2   1  304.10    5.18 
   4   2   1  303.63    5.22 
   4   2   1  305.70    5.20 
   4   2   1  305.43    5.19 
   4   2   1  306.44    5.19 
   4   2   1  306.45    5.17 
  -5  -2  -1   39.24    0.95 
  -5  -2  -1   40.89    0.91 
  -5  -2  -1   42.06    0.89 
   5   2   1   41.91    0.89 
   5   2   1   38.69    0.97 
   5   2   1   39.34    0.91 
   5   2   1   42.16    0.90 
   5   2   1   41.37    0.85 
  -6  -2  -1   40.15    0.69 
  -6  -2  -1   37.32    0.64 
  -6  -2  -1   40.62    0.76 
   6   2   1   37.82    0.64 
   6   2   1   38.60    0.57 
   6   2   1   40.56    0.79 
   6   2   1   38.59    0.69 
  -7  -2  -1   14.35    0.31 
  -7  -2  -1   12.40    0.37 
   7   2   1   13.66    0.28 
   7   2   1   13.03    0.38 
   7   2   1   12.02    0.39 
  -8  -2  -1    9.08    0.72 
   8   2   1    9.00    0.64 
   8   2   1    7.79    0.63 
  -9  -2  -1   -0.12    0.39 
  -9  -2  -1    0.30    0.29 
   9   2   1   -0.27    0.39 
   9   2   1    0.15    0.27 
   9   2   1   -0.25    0.45 
 -10  -2  -1   27.94    0.54 
 -10  -2  -1   27.42    0.41 
  10   2   1   27.13    0.54 
  10   2   1   27.51    0.61 
  10   2   1   27.60    0.41 
 -11  -2  -1    6.40    0.41 
 -11  -2  -1    6.19    0.55 
  11   2   1    5.57    0.54 
  11   2   1    6.21    0.40 
  11   2   1    5.76    0.63 
 -12  -2  -1   22.01    0.62 
 -12  -2  -1   21.03    0.41 
  12   2   1   21.08    0.68 
  12   2   1   20.85    0.57 
  12   2   1   20.98    0.42 
 -13  -2  -1   14.43    0.39 
 -13  -2  -1   15.27    0.60 
  13   2   1   13.78    0.66 
  13   2   1   14.51    0.41 
  13   2   1   14.36    0.58 
 -14  -2  -1    0.86    0.65 
 -14  -2  -1    0.64    0.45 
  14   2   1    0.52    0.63 
  14   2   1    0.61    0.78 
  14   2   1    0.25    0.44 
 -15  -2  -1    0.66    0.45 
 -15  -2  -1    0.88    0.68 
  15   2   1    0.79    0.46 
  15   2   1    0.59    0.67 
  15   2   1   -0.56    0.70 
 -16  -2  -1   -0.25    0.45 
  16   2   1    0.08    0.49 
  16   2   1    1.05    0.74 
  17   2   1    1.18    0.76 
  18   2   1    0.77    0.77 
  19   2   1    1.12    0.90 
  18  -3  -1    3.29    0.84 
  17  -3  -1    0.10    0.80 
 -17   3   1   -0.31    0.77 
  16  -3  -1    2.05    0.77 
  16  -3  -1    1.23    0.92 
 -16   3   1    1.54    0.74 
  15  -3  -1    0.04    0.67 
  15  -3  -1    0.28    0.84 
 -15   3   1   -0.19    0.67 
  14  -3  -1   18.16    0.84 
  14  -3  -1   18.27    0.66 
 -14   3   1   19.00    0.68 
 -14   3   1   18.63    0.48 
  13  -3  -1    1.45    0.75 
  13  -3  -1    1.13    0.58 
 -13   3   1    1.97    0.45 
 -13   3   1    1.88    0.62 
  12  -3  -1    2.76    0.38 
  12  -3  -1    2.98    0.56 
  12  -3  -1    2.58    0.68 
 -12   3   1    2.67    0.38 
 -12   3   1    3.12    0.59 
  11  -3  -1   15.08    0.69 
  11  -3  -1   15.23    0.43 
  11  -3  -1   13.98    0.57 
 -11   3   1   14.74    0.44 
 -11   3   1   15.87    0.61 
  10  -3  -1    2.19    0.36 
  10  -3  -1    1.58    0.49 
  10  -3  -1    1.72    0.59 
 -10   3   1    1.39    0.34 
 -10   3   1    2.96    0.53 
   9  -3  -1    9.77    0.61 
   9  -3  -1    8.54    0.52 
   9  -3  -1    8.66    0.40 
  -9   3   1    7.95    0.40 
  -9   3   1    9.75    0.55 
   8  -3  -1    7.01    0.32 
   8  -3  -1    7.29    0.51 
  -8   3   1    7.40    0.45 
  -8   3   1    6.23    0.31 
   7  -3  -1   -0.97    0.32 
   7  -3  -1   -0.13    0.20 
   7  -3  -1   -0.98    0.39 
   7  -3  -1   -0.25    0.24 
  -7   3   1   -0.24    0.35 
  -7   3   1   -0.50    0.22 
   6  -3  -1    0.75    0.24 
   6  -3  -1    0.58    0.22 
   6  -3  -1    0.43    0.20 
   6  -3  -1   -0.13    0.28 
  -6   3   1    0.01    0.31 
  -6   3   1    0.53    0.20 
   5  -3  -1    3.27    0.31 
   5  -3  -1    4.38    0.21 
   5  -3  -1    4.06    0.20 
   5  -3  -1    4.29    0.23 
   5  -3  -1    3.30    0.27 
  -5   3   1    4.13    0.29 
  -5   3   1    4.31    0.20 
  -5   3   1    3.97    0.20 
   4  -3  -1    2.92    0.17 
   4  -3  -1    2.63    0.21 
   4  -3  -1    2.54    0.20 
   4  -3  -1    2.46    0.24 
   4  -3  -1    2.00    0.26 
  -4   3   1    2.44    0.25 
  -4   3   1    2.74    0.18 
  -4   3   1    2.68    0.03 
  -4   3   1    2.88    0.21 
   3  -3  -1  149.57    1.97 
   3  -3  -1  145.06    1.96 
   3  -3  -1  150.93    1.98 
   3  -3  -1  149.41    1.98 
   3  -3  -1  153.39    2.00 
  -3   3   1  151.25    1.96 
  -3   3   1  152.66    1.99 
  -3   3   1  148.67    1.97 
   2  -3  -1  291.87    5.48 
   2  -3  -1  298.89    5.47 
   2  -3  -1  298.53    5.47 
  -2   3   1  287.30    5.46 
  -2   3   1  295.89    5.48 
   1  -3  -1  295.12    5.39 
  -1   3   1  286.91    5.37 
  -1   3   1  292.76    5.39 
   0  -3  -1    5.96    0.14 
   0   3   1    5.91    0.14 
  -1  -3  -1  274.02    4.20 
  -1  -3  -1  268.19    4.18 
  -1  -3  -1  268.80    4.15 
  -1  -3  -1  265.64    4.22 
  -1  -3  -1  260.72    4.15 
  -1  -3  -1  270.60    4.18 
   1   3   1  268.46    4.15 
   1   3   1  258.09    4.16 
   1   3   1  266.29    4.22 
   1   3   1  268.35    4.18 
   1   3   1  269.92    4.18 
  -2  -3  -1  119.92    1.48 
  -2  -3  -1  118.84    1.52 
  -2  -3  -1  122.42    1.49 
  -2  -3  -1  122.56    1.58 
  -2  -3  -1  121.30    1.50 
  -2  -3  -1  124.61    1.50 
  -2  -3  -1  119.69    1.52 
  -2  -3  -1  121.55    1.49 
   2   3   1  121.44    1.52 
   2   3   1  122.77    1.59 
   2   3   1  121.79    1.50 
   2   3   1  124.96    1.50 
   2   3   1  122.38    1.49 
   2   3   1  122.16    1.48 
   2   3   1  120.30    1.48 
   2   3   1  119.48    1.52 
  -3  -3  -1  304.15    5.51 
  -3  -3  -1  300.79    5.50 
  -3  -3  -1  296.80    5.52 
  -3  -3  -1  302.18    5.51 
  -3  -3  -1  300.79    5.53 
  -3  -3  -1  303.94    5.51 
  -3  -3  -1  294.80    5.53 
   3   3   1  306.94    5.54 
   3   3   1  300.69    5.51 
   3   3   1  303.94    5.51 
   3   3   1  297.15    5.52 
   3   3   1  300.52    5.50 
   3   3   1  301.05    5.54 
   3   3   1  297.00    5.59 
   3   3   1  305.44    5.51 
  -4  -3  -1   43.51    0.80 
  -4  -3  -1   43.65    0.79 
  -4  -3  -1   45.09    0.82 
  -4  -3  -1   44.78    0.85 
   4   3   1   45.13    1.07 
   4   3   1   43.62    0.80 
   4   3   1   45.93    0.87 
   4   3   1   42.98    0.85 
   4   3   1   43.47    0.79 
   4   3   1   43.92    0.81 
   4   3   1   44.32    0.92 
   4   3   1   43.91    0.78 
  -5  -3  -1  148.56    2.27 
  -5  -3  -1  149.57    2.24 
  -5  -3  -1  152.11    2.24 
  -5  -3  -1  152.34    2.25 
   5   3   1  149.56    2.25 
   5   3   1  151.94    2.24 
   5   3   1  149.26    2.28 
   5   3   1  151.87    2.23 
   5   3   1  151.83    2.31 
   5   3   1  150.94    2.22 
   5   3   1  154.93    2.28 
  -6  -3  -1   56.27    0.66 
  -6  -3  -1   56.32    0.67 
  -6  -3  -1   55.96    0.65 
  -6  -3  -1   55.50    0.75 
   6   3   1   54.40    0.77 
   6   3   1   56.80    0.59 
   6   3   1   55.64    0.68 
   6   3   1   57.40    0.81 
   6   3   1   56.60    0.64 
  -7  -3  -1   32.86    0.47 
  -7  -3  -1   31.54    0.48 
   7   3   1   32.76    0.35 
   7   3   1   32.10    0.46 
   7   3   1   33.16    0.40 
   7   3   1   32.50    0.47 
   7   3   1   31.35    0.50 
  -8  -3  -1   20.12    0.34 
  -8  -3  -1   19.39    0.42 
   8   3   1   19.07    0.40 
   8   3   1   18.82    0.46 
   8   3   1   19.29    0.41 
   8   3   1   19.97    0.25 
   8   3   1   19.82    0.32 
  -9  -3  -1   12.44    0.55 
  -9  -3  -1   11.85    0.44 
   9   3   1   12.04    0.58 
   9   3   1   11.60    0.42 
   9   3   1   11.68    0.53 
   9   3   1   10.52    0.50 
 -10  -3  -1    1.82    0.35 
 -10  -3  -1    0.94    0.46 
  10   3   1    1.10    0.53 
  10   3   1    0.67    0.45 
  10   3   1    1.33    0.33 
 -11  -3  -1    0.45    0.36 
 -11  -3  -1    0.57    0.50 
  11   3   1   -0.88    0.47 
  11   3   1    0.24    0.34 
  11   3   1    0.20    0.58 
 -12  -3  -1    9.14    0.61 
 -12  -3  -1    9.03    0.43 
  12   3   1    8.18    0.57 
  12   3   1    8.00    0.65 
  12   3   1    8.84    0.45 
 -13  -3  -1   18.88    0.43 
 -13  -3  -1   19.13    0.61 
  13   3   1   19.54    0.45 
  13   3   1   18.15    0.59 
  13   3   1   18.47    0.68 
 -14  -3  -1    4.98    0.50 
 -14  -3  -1    5.15    0.65 
  14   3   1    3.79    0.70 
  14   3   1    4.10    0.46 
  14   3   1    4.16    0.61 
 -15  -3  -1    5.53    0.68 
 -15  -3  -1    4.51    0.49 
  15   3   1    4.79    0.85 
  15   3   1    3.97    0.47 
  15   3   1    4.33    0.66 
 -16  -3  -1    0.42    0.49 
  16   3   1    0.57    0.51 
  16   3   1    0.75    0.70 
  17   3   1    1.09    0.73 
  18   3   1    3.26    0.81 
  19   3   1    1.51    0.84 
  18  -4  -1    2.05    0.85 
  17  -4  -1    5.09    0.77 
  17  -4  -1    4.32    1.01 
 -17   4   1    4.54    0.80 
  16  -4  -1    0.94    0.90 
  16  -4  -1    0.39    0.73 
 -16   4   1   -0.27    0.78 
  15  -4  -1   -0.06    0.70 
  15  -4  -1    0.52    0.89 
 -15   4   1    1.38    0.73 
  14  -4  -1   -0.03    0.66 
  14  -4  -1    1.55    0.81 
 -14   4   1    0.46    0.68 
  13  -4  -1   -0.38    0.75 
  13  -4  -1    0.03    0.63 
 -13   4   1    1.16    0.65 
 -13   4   1    0.48    0.44 
  12  -4  -1   17.10    0.81 
  12  -4  -1   15.62    0.69 
 -12   4   1   17.66    0.71 
 -12   4   1   16.52    0.49 
  11  -4  -1   -0.60    0.52 
  11  -4  -1    0.46    0.37 
  11  -4  -1   -0.02    0.63 
 -11   4   1    0.52    0.37 
 -11   4   1    0.87    0.55 
  10  -4  -1   27.59    0.73 
  10  -4  -1   29.11    0.71 
  10  -4  -1   30.14    0.81 
 -10   4   1   31.45    0.87 
 -10   4   1   28.53    0.60 
   9  -4  -1   10.89    0.55 
   9  -4  -1   10.58    0.47 
   9  -4  -1   10.24    0.27 
   9  -4  -1   10.84    0.32 
  -9   4   1   10.75    0.31 
  -9   4   1   11.06    0.46 
   8  -4  -1   28.91    0.57 
   8  -4  -1   28.00    0.49 
   8  -4  -1   28.28    0.40 
  -8   4   1   29.74    0.53 
  -8   4   1   27.93    0.39 
   7  -4  -1    4.05    0.25 
   7  -4  -1    4.11    0.24 
   7  -4  -1    4.12    0.35 
   7  -4  -1    3.27    0.33 
  -7   4   1    3.81    0.35 
  -7   4   1    3.97    0.24 
   6  -4  -1   26.52    0.37 
   6  -4  -1   26.08    0.29 
   6  -4  -1   27.11    0.45 
   6  -4  -1   26.36    0.31 
   6  -4  -1   26.67    0.33 
  -6   4   1   27.86    0.41 
   5  -4  -1    7.18    0.30 
   5  -4  -1    6.84    0.36 
   5  -4  -1    6.71    0.32 
   5  -4  -1    5.86    0.35 
  -5   4   1    6.26    0.27 
  -5   4   1    6.58    0.34 
  -5   4   1    6.12    0.25 
   4  -4  -1    8.59    0.31 
   4  -4  -1    8.92    0.31 
   4  -4  -1    9.08    0.34 
   4  -4  -1    8.52    0.26 
  -4   4   1    8.01    0.23 
  -4   4   1    9.04    0.27 
  -4   4   1    8.95    0.31 
   3  -4  -1  137.57    1.13 
   3  -4  -1  138.04    1.16 
   3  -4  -1  137.37    1.12 
   3  -4  -1  136.50    1.16 
  -3   4   1  136.71    1.15 
  -3   4   1  137.42    1.15 
  -3   4   1  136.10    1.12 
  -3   4   1  137.91    1.11 
   2  -4  -1   14.36    0.40 
   2  -4  -1   15.77    0.48 
  -2   4   1   15.42    0.39 
  -2   4   1   15.35    0.48 
   1  -4  -1  148.01    2.77 
  -1   4   1  146.08    2.77 
   0  -4  -1  155.24    1.71 
   0   4   1  154.31    1.71 
  -1  -4  -1    0.56    0.20 
  -1  -4  -1    0.48    0.40 
  -1  -4  -1    0.42    0.09 
  -1  -4  -1    0.39    0.21 
  -1  -4  -1    0.40    0.16 
   1   4   1    0.50    0.21 
   1   4   1    0.46    0.12 
   1   4   1    0.42    0.08 
   1   4   1    0.27    0.15 
  -2  -4  -1  131.86    1.85 
  -2  -4  -1  132.54    1.85 
  -2  -4  -1  131.93    1.88 
  -2  -4  -1  133.10    1.91 
  -2  -4  -1  132.58    1.85 
  -2  -4  -1  132.67    1.91 
  -2  -4  -1  129.67    1.98 
   2   4   1  131.65    1.88 
   2   4   1  132.85    1.91 
   2   4   1  132.40    1.84 
   2   4   1  129.61    1.98 
   2   4   1  132.40    1.91 
   2   4   1  131.51    1.85 
  -3  -4  -1   29.10    0.60 
  -3  -4  -1   26.05    0.46 
  -3  -4  -1   26.39    0.40 
  -3  -4  -1   26.28    0.44 
  -3  -4  -1   27.81    0.40 
  -3  -4  -1   26.67    0.41 
  -3  -4  -1   27.35    0.74 
   3   4   1   26.19    0.47 
   3   4   1   28.21    0.51 
   3   4   1   27.28    0.38 
   3   4   1   26.83    0.44 
   3   4   1   27.65    0.38 
   3   4   1   27.94    0.53 
   3   4   1   27.50    0.40 
   3   4   1   27.93    0.77 
  -4  -4  -1  254.57    2.95 
  -4  -4  -1  253.97    3.02 
  -4  -4  -1  253.78    2.97 
  -4  -4  -1  252.04    2.99 
  -4  -4  -1  253.14    2.95 
  -4  -4  -1  256.18    2.96 
  -4  -4  -1  253.75    2.95 
   4   4   1  255.05    2.98 
   4   4   1  255.28    3.01 
   4   4   1  253.81    2.95 
   4   4   1  255.13    2.95 
   4   4   1  254.42    3.13 
   4   4   1  252.19    2.99 
   4   4   1  251.85    2.94 
   4   4   1  254.33    2.95 
  -5  -4  -1    6.06    0.35 
  -5  -4  -1    5.34    0.34 
  -5  -4  -1    5.15    0.29 
  -5  -4  -1    5.14    0.36 
   5   4   1    5.69    0.32 
   5   4   1    5.82    0.34 
   5   4   1    4.64    0.34 
   5   4   1    4.92    0.27 
   5   4   1    4.32    0.34 
   5   4   1    5.41    0.38 
   5   4   1    5.65    0.32 
  -6  -4  -1   38.62    0.54 
  -6  -4  -1   37.47    0.56 
  -6  -4  -1   36.28    0.62 
  -6  -4  -1   37.87    0.55 
   6   4   1   37.74    0.97 
   6   4   1   36.42    0.56 
   6   4   1   38.14    0.49 
   6   4   1   38.12    0.52 
   6   4   1   36.94    0.55 
   6   4   1   39.22    0.71 
  -7  -4  -1   33.52    0.80 
  -7  -4  -1   34.60    0.80 
  -7  -4  -1   32.57    0.89 
   7   4   1   33.77    0.73 
   7   4   1   33.87    0.94 
   7   4   1   34.00    0.79 
   7   4   1   32.93    0.82 
   7   4   1   31.26    0.91 
  -8  -4  -1   32.99    0.60 
  -8  -4  -1   33.81    0.73 
   8   4   1   32.34    0.78 
   8   4   1   32.60    0.64 
   8   4   1   32.41    0.58 
   8   4   1   30.97    0.59 
   8   4   1   33.12    0.69 
   8   4   1   32.50    0.49 
  -9  -4  -1   35.03    0.65 
  -9  -4  -1   34.25    0.79 
   9   4   1   33.97    0.72 
   9   4   1   34.19    0.50 
   9   4   1   33.09    0.65 
   9   4   1   35.65    0.65 
   9   4   1   36.00    0.75 
   9   4   1   33.67    0.70 
 -10  -4  -1    2.14    0.35 
 -10  -4  -1    1.47    0.46 
  10   4   1    1.80    0.33 
  10   4   1    1.64    0.46 
  10   4   1    1.89    0.52 
  10   4   1    2.41    0.43 
 -11  -4  -1    6.06    0.39 
 -11  -4  -1    5.58    0.50 
  11   4   1    5.35    0.56 
  11   4   1    6.13    0.46 
  11   4   1    5.52    0.51 
  11   4   1    6.25    0.37 
 -12  -4  -1    5.90    0.60 
 -12  -4  -1    5.27    0.40 
  12   4   1    4.83    0.48 
  12   4   1    5.48    0.63 
  12   4   1    6.38    0.43 
  12   4   1    5.56    0.56 
 -13  -4  -1    4.22    0.40 
 -13  -4  -1    4.25    0.58 
  13   4   1    4.00    0.58 
  13   4   1    3.55    0.66 
  13   4   1    4.26    0.41 
  13   4   1    4.05    0.48 
 -14  -4  -1    8.75    0.63 
 -14  -4  -1    8.58    0.50 
  14   4   1    8.79    0.75 
  14   4   1    7.53    0.49 
  14   4   1    8.43    0.44 
  14   4   1    8.93    0.65 
 -15  -4  -1    0.96    0.51 
  15   4   1    0.98    0.49 
  15   4   1    0.81    0.63 
 -16  -4  -1   12.10    0.53 
  16   4   1   12.02    0.72 
 -17  -4  -1    0.97    0.57 
  17   4   1    1.35    0.74 
  18   4   1    2.54    0.78 
  19   4   1    2.85    0.87 
  18  -5  -1    1.33    0.85 
  17  -5  -1    1.16    0.85 
  16  -5  -1    4.90    0.87 
  16  -5  -1    5.21    0.76 
 -16   5   1    5.87    0.81 
  15  -5  -1    0.55    0.73 
  15  -5  -1    0.69    0.87 
 -15   5   1    0.93    0.74 
  14  -5  -1    2.25    0.77 
  14  -5  -1    2.68    0.65 
 -14   5   1    3.58    0.71 
  13  -5  -1    6.83    0.79 
  13  -5  -1    6.57    0.64 
 -13   5   1    6.86    0.66 
 -13   5   1    6.99    0.43 
  12  -5  -1    7.79    0.65 
  12  -5  -1    8.01    0.75 
 -12   5   1    8.56    0.48 
 -12   5   1    9.38    0.71 
  11  -5  -1    6.99    0.39 
  11  -5  -1    6.76    0.61 
  11  -5  -1    8.22    0.74 
 -11   5   1    6.61    0.39 
 -11   5   1    8.77    0.64 
  10  -5  -1    3.90    0.59 
  10  -5  -1    3.30    0.51 
  10  -5  -1    3.85    0.33 
  10  -5  -1    4.29    0.30 
 -10   5   1    3.84    0.33 
 -10   5   1    4.28    0.50 
   9  -5  -1   11.75    0.31 
   9  -5  -1   10.69    0.44 
   9  -5  -1   11.77    0.33 
   9  -5  -1    9.96    0.51 
  -9   5   1   11.39    0.46 
  -9   5   1   11.51    0.32 
   8  -5  -1   10.26    0.42 
   8  -5  -1   10.57    0.49 
   8  -5  -1   11.07    0.31 
   8  -5  -1   11.12    0.32 
  -8   5   1   11.32    0.45 
   7  -5  -1   77.72    0.77 
   7  -5  -1   76.13    0.83 
   7  -5  -1   74.89    0.91 
   7  -5  -1   78.40    0.80 
  -7   5   1   75.81    0.87 
   6  -5  -1   91.72    1.41 
   6  -5  -1   90.07    1.39 
   6  -5  -1   95.84    1.49 
   6  -5  -1   91.91    1.43 
   6  -5  -1   93.20    1.41 
  -6   5   1   89.43    1.38 
   5  -5  -1   16.31    0.59 
   5  -5  -1   13.80    0.59 
   5  -5  -1   15.78    0.57 
  -5   5   1   16.30    0.59 
  -5   5   1   13.28    0.62 
  -5   5   1   14.30    0.51 
   4  -5  -1   18.72    0.44 
   4  -5  -1   19.00    0.51 
   4  -5  -1   20.05    0.49 
   4  -5  -1   21.62    0.57 
  -4   5   1   20.77    0.40 
  -4   5   1   20.36    0.50 
   3  -5  -1   31.80    0.63 
   3  -5  -1   31.09    0.56 
   3  -5  -1   29.70    0.61 
  -3   5   1   31.86    0.63 
  -3   5   1   31.80    0.55 
   2  -5  -1    0.84    0.26 
  -2   5   1    0.80    0.26 
  -2   5   1    0.99    0.11 
   1  -5  -1  118.12    2.02 
  -1   5   1  117.34    2.02 
   0  -5  -1  231.21    4.80 
   0   5   1  231.60    4.80 
  -1  -5  -1   97.12    2.35 
  -1  -5  -1   94.06    2.27 
  -1  -5  -1   99.55    2.44 
  -1  -5  -1   98.43    2.33 
   1   5   1   96.92    2.32 
  -2  -5  -1   60.46    0.93 
  -2  -5  -1   61.39    1.20 
  -2  -5  -1   60.95    0.96 
  -2  -5  -1   60.88    0.93 
  -2  -5  -1   61.23    1.00 
  -2  -5  -1   59.94    0.93 
  -2  -5  -1   61.08    1.06 
  -2  -5  -1   62.52    1.07 
   2   5   1   60.47    0.99 
   2   5   1   61.34    1.03 
   2   5   1   59.77    1.16 
   2   5   1   59.78    0.92 
   2   5   1   61.11    0.96 
  -3  -5  -1   97.70    1.38 
  -3  -5  -1   97.89    1.09 
  -3  -5  -1   99.14    1.22 
  -3  -5  -1   97.46    1.13 
  -3  -5  -1   98.90    1.13 
  -3  -5  -1   98.47    1.10 
  -3  -5  -1   98.99    1.18 
  -3  -5  -1   97.59    1.10 
   3   5   1   98.00    1.08 
   3   5   1   99.70    1.20 
   3   5   1   98.28    1.13 
   3   5   1   97.32    1.33 
   3   5   1   97.05    1.08 
   3   5   1   97.44    1.13 
   3   5   1   98.60    1.08 
  -4  -5  -1    9.99    0.63 
  -5  -5  -1    0.69    0.25 
  -5  -5  -1    1.23    0.29 
  -5  -5  -1    0.51    0.24 
  -5  -5  -1    0.60    0.24 
  -5  -5  -1    1.82    0.33 
  -5  -5  -1    1.16    0.20 
   5   5   1    0.85    0.24 
   5   5   1    1.24    0.25 
   5   5   1    1.52    0.28 
   5   5   1    0.52    0.29 
   5   5   1    0.96    0.22 
   5   5   1    0.31    0.24 
   5   5   1    0.96    0.18 
   5   5   1    1.03    0.69 
  -6  -5  -1  104.13    1.37 
  -6  -5  -1  105.39    1.40 
  -6  -5  -1  106.42    1.44 
  -6  -5  -1  104.15    1.39 
   6   5   1  106.16    1.44 
   6   5   1  105.30    1.43 
   6   5   1  104.45    1.38 
   6   5   1  104.32    1.36 
   6   5   1  104.87    1.66 
   6   5   1  104.97    1.48 
   6   5   1  104.35    1.36 
  -7  -5  -1   79.31    1.08 
  -7  -5  -1   81.86    1.16 
  -7  -5  -1   79.29    1.09 
   7   5   1   79.50    1.04 
   7   5   1   81.56    1.18 
   7   5   1   80.32    1.47 
   7   5   1   79.38    1.07 
   7   5   1   78.10    1.12 
   7   5   1   79.45    1.09 
   7   5   1   79.84    1.24 
  -8  -5  -1    6.34    0.31 
  -8  -5  -1    6.25    0.28 
  -8  -5  -1    6.04    0.37 
   8   5   1    6.02    0.25 
   8   5   1    5.65    0.34 
   8   5   1    6.54    0.33 
   8   5   1    5.71    0.40 
   8   5   1    6.52    0.35 
   8   5   1    6.59    0.27 
   8   5   1    5.47    0.98 
  -9  -5  -1   15.41    0.44 
  -9  -5  -1   16.07    0.34 
   9   5   1   16.02    0.32 
   9   5   1   15.88    0.28 
   9   5   1   16.55    0.41 
   9   5   1   15.21    0.41 
   9   5   1   14.66    0.47 
   9   5   1   15.85    1.12 
 -10  -5  -1    0.68    0.48 
 -10  -5  -1    0.95    0.36 
  10   5   1    0.90    1.21 
  10   5   1    0.25    0.45 
  10   5   1    1.30    0.34 
  10   5   1    0.31    0.52 
 -11  -5  -1    0.51    0.52 
 -11  -5  -1    0.38    0.36 
  11   5   1    0.39    0.55 
  11   5   1    0.97    0.36 
  11   5   1    0.34    0.41 
  11   5   1    0.20    0.48 
 -12  -5  -1    4.98    0.59 
 -12  -5  -1    4.84    0.41 
  12   5   1    4.46    0.63 
  12   5   1    4.42    0.54 
  12   5   1    4.86    0.42 
  12   5   1    4.83    0.48 
 -13  -5  -1    3.30    0.59 
 -13  -5  -1    3.16    0.41 
  13   5   1    2.97    0.42 
  13   5   1    3.05    0.45 
  13   5   1    2.87    0.57 
  13   5   1    3.79    0.68 
 -14  -5  -1    4.06    0.61 
 -14  -5  -1    3.56    0.48 
  14   5   1    3.72    0.46 
  14   5   1    3.80    0.42 
  14   5   1    3.83    0.60 
  14   5   1    4.33    0.69 
 -15  -5  -1    0.33    0.51 
  15   5   1    0.30    0.44 
  15   5   1    0.53    0.64 
 -16  -5  -1    0.57    0.50 
  16   5   1    0.51    0.68 
 -17  -5  -1    0.40    0.53 
  17   5   1   -3.04    1.78 
  17   5   1    0.68    0.72 
  18   5   1    1.30    0.80 
  19   5   1    5.24    0.87 
  18  -6  -1    1.56    0.92 
  17  -6  -1   -0.22    0.81 
  16  -6  -1    0.54    0.77 
 -16   6   1   -0.37    0.76 
  15  -6  -1    0.24    0.80 
  15  -6  -1    0.36    0.75 
 -15   6   1    0.85    0.72 
  14  -6  -1    0.55    0.69 
  14  -6  -1    1.01    0.79 
 -14   6   1    1.31    0.70 
  13  -6  -1    6.57    0.72 
  13  -6  -1    6.01    0.72 
 -13   6   1    7.02    0.67 
  12  -6  -1    2.64    0.65 
  12  -6  -1    4.22    0.78 
 -12   6   1    4.13    0.66 
 -12   6   1    3.01    0.43 
  11  -6  -1   -0.53    0.65 
  11  -6  -1   -0.27    0.33 
  11  -6  -1   -0.35    0.59 
 -11   6   1   -0.13    0.38 
 -11   6   1    0.85    0.58 
  10  -6  -1    0.14    0.32 
  10  -6  -1   -0.74    0.34 
  10  -6  -1   -0.73    0.57 
  10  -6  -1   -1.48    0.52 
 -10   6   1   -0.11    0.49 
   9  -6  -1   -0.94    0.43 
   9  -6  -1   -0.53    0.54 
   9  -6  -1    0.03    0.31 
   9  -6  -1    0.29    0.34 
  -9   6   1    0.02    0.46 
   8  -6  -1    4.57    0.45 
   8  -6  -1    5.65    0.30 
   8  -6  -1    4.86    0.39 
   8  -6  -1    5.41    0.27 
  -8   6   1    6.42    0.22 
  -8   6   1    6.35    0.43 
   7  -6  -1   35.39    0.62 
   7  -6  -1   36.32    0.75 
   7  -6  -1   34.07    0.59 
   7  -6  -1   36.07    0.61 
   7  -6  -1   34.52    0.64 
  -7   6   1   34.55    0.57 
  -7   6   1   36.98    0.72 
   6  -6  -1    4.79    0.28 
   6  -6  -1    4.55    0.32 
   6  -6  -1    4.25    0.35 
   6  -6  -1    4.78    0.24 
   6  -6  -1    4.38    0.33 
  -6   6   1    4.95    0.24 
  -6   6   1    4.74    0.34 
   5  -6  -1   32.23    0.63 
   5  -6  -1   30.11    0.64 
   5  -6  -1   30.26    0.59 
   5  -6  -1   29.77    0.57 
  -5   6   1   30.63    0.57 
  -5   6   1   30.96    0.52 
  -5   6   1   31.14    0.64 
   4  -6  -1   86.63    0.94 
   4  -6  -1   85.96    0.91 
   4  -6  -1   87.18    0.94 
  -4   6   1   87.46    0.94 
  -4   6   1   84.28    0.88 
  -4   6   1   87.36    0.92 
   3  -6  -1    9.01    0.32 
   3  -6  -1    8.80    0.21 
  -3   6   1    9.48    0.31 
  -3   6   1    8.37    0.15 
   2  -6  -1  149.54    2.16 
  -2   6   1  147.11    2.08 
  -2   6   1  150.09    2.15 
   1  -6  -1   86.14    1.08 
  -1   6   1   86.73    1.07 
   0  -6  -1   93.61    0.96 
   0   6   1   93.06    0.94 
  -1  -6  -1    2.82    0.31 
  -1  -6  -1    3.38    0.10 
  -1  -6  -1    2.83    0.62 
  -1  -6  -1    3.19    0.27 
   1   6   1    3.32    0.31 
  -2  -6  -1   48.16    0.99 
  -2  -6  -1   51.50    0.83 
  -2  -6  -1   50.71    0.62 
  -2  -6  -1   50.73    0.72 
  -2  -6  -1   49.42    0.62 
  -2  -6  -1   51.10    0.62 
   2   6   1   51.14    0.77 
   2   6   1   50.96    0.61 
   2   6   1   50.71    0.71 
  -3  -6  -1   42.65    1.12 
  -3  -6  -1   39.44    0.54 
  -3  -6  -1   39.70    0.45 
  -3  -6  -1   40.18    0.44 
  -3  -6  -1   42.47    0.71 
  -3  -6  -1   40.29    0.53 
  -3  -6  -1   40.74    0.47 
  -3  -6  -1   40.13    0.61 
   3   6   1   40.43    0.43 
   3   6   1   40.11    0.52 
   3   6   1   40.22    0.52 
   3   6   1   40.63    0.41 
   3   6   1   40.25    0.81 
  -4  -6  -1    5.58    0.33 
  -4  -6  -1    5.39    0.19 
  -4  -6  -1    5.93    0.32 
  -4  -6  -1    5.99    0.29 
  -4  -6  -1    4.35    0.31 
  -4  -6  -1    5.58    0.25 
  -4  -6  -1    4.89    0.24 
   4   6   1    5.47    0.30 
   4   6   1    5.83    0.70 
   4   6   1    5.29    0.18 
   4   6   1    5.32    0.25 
   4   6   1    5.68    0.28 
   4   6   1    5.70    0.21 
   4   6   1    5.54    0.19 
  -5  -6  -1   -0.18    0.20 
  -5  -6  -1    0.14    0.26 
  -5  -6  -1   -0.19    0.24 
  -5  -6  -1    0.07    0.29 
  -5  -6  -1    0.20    0.31 
  -5  -6  -1    0.78    0.32 
  -5  -6  -1    0.38    0.29 
   5   6   1   -0.04    0.28 
   5   6   1   -0.17    0.70 
   5   6   1   -0.11    0.29 
   5   6   1    0.28    0.25 
   5   6   1    0.12    0.18 
   5   6   1    0.12    0.29 
   5   6   1    0.01    0.24 
   5   6   1   -0.19    0.29 
  -6  -6  -1   -0.33    0.28 
  -6  -6  -1    0.05    0.29 
  -6  -6  -1    0.32    0.33 
  -6  -6  -1   -0.25    0.30 
  -6  -6  -1   -0.14    0.23 
  -6  -6  -1    0.25    0.37 
   6   6   1   -0.32    0.33 
   6   6   1   -0.17    0.21 
   6   6   1   -0.22    0.28 
   6   6   1   -0.08    0.29 
   6   6   1   -0.58    0.29 
   6   6   1   -0.02    0.30 
   6   6   1   -0.31    0.80 
  -7  -6  -1  216.61    2.95 
  -7  -6  -1  215.14    2.99 
  -7  -6  -1  212.62    2.96 
   7   6   1  214.18    3.05 
   7   6   1  212.61    3.20 
   7   6   1  214.21    2.96 
   7   6   1  213.25    2.94 
   7   6   1  215.30    2.94 
   7   6   1  216.66    3.01 
   7   6   1  217.15    3.01 
  -8  -6  -1   13.26    0.33 
  -8  -6  -1   12.44    0.42 
  -8  -6  -1   12.23    0.38 
   8   6   1   12.65    1.05 
   8   6   1   12.05    0.40 
   8   6   1   13.38    0.32 
   8   6   1   12.53    0.39 
   8   6   1   13.22    0.34 
   8   6   1   11.52    0.44 
  -9  -6  -1    0.03    0.44 
  -9  -6  -1    0.25    0.35 
  -9  -6  -1    0.01    0.31 
   9   6   1    0.03    0.29 
   9   6   1   -0.23    0.34 
   9   6   1   -0.07    0.28 
   9   6   1    1.47    1.16 
   9   6   1   -0.34    0.45 
   9   6   1    0.15    0.39 
 -10  -6  -1    5.74    0.37 
 -10  -6  -1    5.36    0.48 
  10   6   1    6.29    0.34 
  10   6   1    6.62    0.40 
  10   6   1    6.73    1.28 
  10   6   1    5.01    0.50 
  10   6   1    5.44    0.44 
  10   6   1    6.52    0.31 
 -11  -6  -1   32.88    0.69 
 -11  -6  -1   32.33    0.55 
  11   6   1   32.67    0.73 
  11   6   1   33.83    0.57 
  11   6   1   34.71    1.56 
  11   6   1   33.81    0.67 
  11   6   1   32.65    0.73 
 -12  -6  -1    5.10    0.54 
 -12  -6  -1    5.72    0.41 
  12   6   1    4.20    1.50 
  12   6   1    5.30    0.41 
  12   6   1    5.20    0.38 
  12   6   1    4.34    0.59 
  12   6   1    5.21    0.53 
 -13  -6  -1    0.75    0.57 
 -13  -6  -1    1.16    0.44 
  13   6   1    0.70    0.55 
  13   6   1    0.98    0.40 
  13   6   1    0.37    0.62 
  13   6   1    1.01    0.41 
  13   6   1    0.55    1.54 
 -14  -6  -1    0.74    0.70 
 -14  -6  -1    0.14    0.47 
  14   6   1    0.20    0.58 
  14   6   1   -0.11    1.57 
  14   6   1    0.12    0.41 
  14   6   1    0.15    0.40 
 -15  -6  -1    1.13    0.48 
  15   6   1    0.38    1.66 
  15   6   1    0.64    0.62 
 -16  -6  -1   -0.37    0.48 
  16   6   1   -2.11    1.74 
  16   6   1    0.23    0.68 
  17   6   1    0.72    0.71 
  17   6   1   -1.21    1.87 
  18   6   1   -0.74    1.88 
  18   6   1    2.60    0.76 
  17  -7  -1    1.29    0.87 
  16  -7  -1    2.79    0.85 
  15  -7  -1    0.38    0.74 
 -15   7   1    1.04    0.73 
  14  -7  -1    0.94    0.77 
  14  -7  -1    1.47    0.75 
 -14   7   1    0.99    0.68 
  13  -7  -1    9.20    0.77 
  13  -7  -1    8.83    0.73 
 -13   7   1    8.75    0.65 
  12  -7  -1    1.04    0.71 
  12  -7  -1    0.03    0.67 
 -12   7   1   -0.14    0.34 
 -12   7   1    0.77    0.59 
  11  -7  -1   -0.24    0.60 
  11  -7  -1    0.17    0.60 
 -11   7   1    1.18    0.58 
  10  -7  -1    7.32    0.64 
  10  -7  -1    6.32    0.55 
 -10   7   1    7.55    0.26 
 -10   7   1    7.72    0.53 
   9  -7  -1    6.94    0.61 
   9  -7  -1    6.92    0.55 
  -9   7   1    7.48    0.57 
  -9   7   1    7.14    0.39 
   8  -7  -1    4.41    0.50 
   8  -7  -1    3.90    0.43 
  -8   7   1    5.40    0.45 
  -8   7   1    4.10    0.29 
   7  -7  -1   64.04    0.70 
   7  -7  -1   63.78    0.68 
   7  -7  -1   63.49    0.74 
   7  -7  -1   63.11    0.84 
  -7   7   1   64.91    0.78 
  -7   7   1   64.83    0.67 
   6  -7  -1   28.76    0.52 
   6  -7  -1   30.00    0.61 
   6  -7  -1   28.02    0.46 
  -6   7   1   27.06    0.35 
  -6   7   1   28.24    0.33 
   5  -7  -1   75.24    1.42 
   5  -7  -1   73.54    1.39 
  -5   7   1   72.86    1.35 
  -5   7   1   76.14    1.40 
  -5   7   1   76.10    1.42 
   4  -7  -1   16.68    0.41 
   4  -7  -1   15.67    0.39 
  -4   7   1   16.54    0.37 
  -4   7   1   17.44    0.49 
   3  -7  -1  137.48    1.69 
  -3   7   1  136.85    1.68 
  -3   7   1  140.37    1.76 
  -2   7   1    7.10    0.33 
  -1   7   1   55.03    0.94 
   0  -7  -1   18.56    0.35 
   0   7   1   19.51    0.38 
  -1  -7  -1  319.87    3.73 
   1   7   1  316.82    3.69 
  -2  -7  -1    9.77    0.14 
  -2  -7  -1   10.54    0.22 
  -2  -7  -1   10.26    0.17 
  -2  -7  -1    9.52    0.33 
  -2  -7  -1    9.83    0.30 
   2   7   1    9.70    0.23 
   2   7   1   10.44    0.20 
   2   7   1   10.30    0.31 
  -3  -7  -1   80.09    1.26 
  -3  -7  -1   80.90    1.38 
  -3  -7  -1   81.03    1.23 
  -3  -7  -1   81.54    1.22 
  -3  -7  -1   80.06    1.36 
  -3  -7  -1   81.97    1.24 
   3   7   1   80.78    1.21 
   3   7   1   81.11    1.29 
   3   7   1   81.34    1.33 
   3   7   1   80.44    1.26 
  -4  -7  -1   27.42    0.75 
  -4  -7  -1   27.93    0.76 
  -4  -7  -1   28.53    0.93 
  -4  -7  -1   29.39    0.73 
  -4  -7  -1   25.74    0.79 
   4   7   1   27.91    0.71 
   4   7   1   28.96    0.73 
   4   7   1   28.35    0.80 
   4   7   1   26.04    1.05 
   4   7   1   29.37    0.90 
   4   7   1   27.34    0.71 
  -5  -7  -1    5.29    0.37 
  -5  -7  -1    5.28    0.29 
  -5  -7  -1    4.89    0.36 
  -5  -7  -1    5.40    0.23 
  -5  -7  -1    5.03    0.28 
  -5  -7  -1    5.92    0.33 
   5   7   1    4.99    0.30 
   5   7   1    5.48    0.32 
   5   7   1    5.39    0.28 
   5   7   1    5.44    0.25 
   5   7   1    5.03    0.34 
   5   7   1    5.08    0.74 
   5   7   1    5.37    0.21 
  -6  -7  -1   96.26    1.07 
  -6  -7  -1   94.66    0.96 
  -6  -7  -1   92.23    0.99 
  -6  -7  -1   95.68    0.93 
  -6  -7  -1   94.01    1.13 
  -6  -7  -1   91.99    0.94 
   6   7   1   91.03    1.00 
   6   7   1   92.93    0.91 
   6   7   1   93.99    0.94 
   6   7   1   94.52    1.08 
   6   7   1   94.55    0.90 
   6   7   1   91.29    1.33 
  -7  -7  -1   13.84    0.51 
  -7  -7  -1   13.67    0.33 
  -7  -7  -1   13.52    0.43 
   7   7   1   13.80    0.39 
   7   7   1   13.71    1.00 
   7   7   1   13.52    0.38 
   7   7   1   12.42    0.44 
   7   7   1   13.77    0.32 
   7   7   1   13.76    0.44 
   7   7   1   12.59    0.40 
  -8  -7  -1   84.75    0.98 
  -8  -7  -1   87.98    0.89 
  -8  -7  -1   84.37    0.92 
   8   7   1   83.37    0.98 
   8   7   1   86.39    0.85 
   8   7   1   87.70    0.87 
   8   7   1   85.31    0.88 
   8   7   1   85.77    1.45 
  -9  -7  -1    0.47    0.45 
  -9  -7  -1    0.16    0.32 
  -9  -7  -1   -0.43    0.38 
   9   7   1    0.90    0.29 
   9   7   1    0.87    1.13 
   9   7   1    0.68    0.31 
   9   7   1    0.85    0.41 
   9   7   1   -0.15    0.47 
   9   7   1    0.50    0.37 
 -10  -7  -1   60.08    0.67 
 -10  -7  -1   61.20    0.66 
  10   7   1   62.04    1.44 
  10   7   1   60.88    0.64 
  10   7   1   61.07    0.61 
  10   7   1   60.78    0.54 
  10   7   1   59.46    0.69 
 -11  -7  -1   20.72    0.60 
 -11  -7  -1   20.84    0.47 
  11   7   1   20.98    0.44 
  11   7   1   21.13    0.53 
  11   7   1   20.76    0.67 
  11   7   1   20.90    0.57 
  11   7   1   22.34    1.49 
 -12  -7  -1   21.89    0.58 
 -12  -7  -1   22.07    0.42 
  12   7   1   21.99    0.56 
  12   7   1   21.82    0.39 
  12   7   1   22.35    0.45 
  12   7   1   21.32    0.61 
  12   7   1   21.71    1.51 
 -13  -7  -1    6.14    0.61 
 -13  -7  -1    5.29    0.41 
  13   7   1    5.26    0.54 
  13   7   1    5.76    0.63 
  13   7   1    5.46    0.41 
  13   7   1    5.14    0.38 
  13   7   1    5.63    1.52 
 -14  -7  -1   15.72    0.46 
  14   7   1   15.98    0.42 
  14   7   1   15.18    1.56 
  14   7   1   16.18    0.61 
 -15  -7  -1    1.55    0.48 
  15   7   1    1.59    0.62 
  15   7   1    2.15    1.72 
  16   7   1    2.19    0.68 
  16   7   1    1.93    1.81 
  17   7   1    2.46    1.84 
  17   7   1    2.45    0.71 
  18   7   1   -0.94    1.90 
  18   7   1    0.62    0.72 
  17  -8  -1    2.84    0.96 
  16  -8  -1    2.64    0.87 
  15  -8  -1    3.82    0.83 
  14  -8  -1    5.09    0.75 
 -14   8   1    5.44    0.69 
  13  -8  -1    9.45    0.83 
  13  -8  -1    9.02    0.76 
 -13   8   1    9.14    0.67 
  12  -8  -1    3.20    0.70 
  12  -8  -1    3.16    0.69 
 -12   8   1    2.76    0.59 
  11  -8  -1    3.78    0.69 
  11  -8  -1    3.74    0.75 
 -11   8   1    4.26    0.63 
 -11   8   1    3.37    0.45 
  10  -8  -1    3.96    0.63 
  10  -8  -1    3.39    0.58 
 -10   8   1    3.49    0.37 
 -10   8   1    4.44    0.53 
   9  -8  -1   15.82    0.62 
   9  -8  -1   15.32    0.60 
  -9   8   1   15.84    0.43 
  -9   8   1   16.03    0.60 
   8  -8  -1    0.29    0.48 
   8  -8  -1    0.31    0.49 
  -8   8   1    1.39    0.32 
  -8   8   1    1.25    0.45 
   7  -8  -1    3.32    0.40 
   7  -8  -1    3.33    0.33 
   7  -8  -1    3.17    0.44 
  -7   8   1    3.51    0.39 
  -7   8   1    3.74    0.28 
   6  -8  -1    2.48    0.42 
   6  -8  -1    3.00    0.37 
   6  -8  -1    2.26    0.42 
  -6   8   1    2.34    0.38 
  -6   8   1    3.10    0.31 
   5  -8  -1   15.94    0.58 
   5  -8  -1   14.10    0.52 
  -5   8   1   13.25    0.44 
  -5   8   1   14.70    0.50 
  -5   8   1   14.27    0.58 
   4  -8  -1  170.35    2.76 
  -4   8   1  174.80    2.82 
  -4   8   1  173.43    2.74 
  -3   8   1    6.65    0.55 
  -2   8   1    8.92    0.39 
  -1   8   1   84.31    0.89 
   0  -8  -1   32.09    0.78 
   0   8   1   31.30    0.65 
  -1  -8  -1   10.49    0.31 
   1   8   1   10.66    0.33 
  -2  -8  -1   16.56    0.67 
  -2  -8  -1   16.83    0.72 
  -2  -8  -1   16.98    0.41 
   2   8   1   17.23    0.55 
  -3  -8  -1    3.66    0.33 
  -3  -8  -1    3.38    0.21 
  -3  -8  -1    3.38    0.36 
  -3  -8  -1    3.18    0.17 
  -3  -8  -1    2.70    0.21 
  -3  -8  -1    3.62    0.26 
   3   8   1    3.36    0.24 
   3   8   1    3.09    0.32 
   3   8   1    3.47    0.24 
  -4  -8  -1   14.81    0.47 
  -4  -8  -1   15.11    0.39 
  -4  -8  -1   15.65    0.44 
  -4  -8  -1   14.91    0.34 
  -4  -8  -1   14.75    0.51 
  -4  -8  -1   14.90    0.41 
   4   8   1   15.64    0.61 
   4   8   1   14.74    0.40 
   4   8   1   16.94    0.88 
   4   8   1   15.38    0.49 
  -5  -8  -1   12.18    0.32 
  -5  -8  -1   12.15    0.28 
  -5  -8  -1   11.44    0.27 
  -5  -8  -1   11.71    0.37 
  -5  -8  -1   11.81    0.22 
  -5  -8  -1   12.38    0.38 
   5   8   1   11.83    0.33 
   5   8   1   11.48    0.77 
   5   8   1   11.80    0.28 
   5   8   1   11.66    0.20 
   5   8   1   11.99    0.31 
   5   8   1   11.73    0.18 
   5   8   1   11.90    0.22 
  -6  -8  -1    3.70    0.44 
  -6  -8  -1    4.65    0.37 
  -6  -8  -1    3.13    0.33 
  -6  -8  -1    3.41    0.27 
  -6  -8  -1    3.77    0.38 
  -6  -8  -1    3.63    0.43 
   6   8   1    3.68    0.39 
   6   8   1    3.36    0.34 
   6   8   1    4.17    0.90 
   6   8   1    3.69    0.24 
   6   8   1    4.51    0.38 
   6   8   1    3.95    0.30 
  -7  -8  -1   14.63    0.45 
  -7  -8  -1   15.17    0.53 
  -7  -8  -1   15.05    0.34 
  -7  -8  -1   14.34    0.41 
   7   8   1   14.10    0.41 
   7   8   1   15.51    0.43 
   7   8   1   14.86    0.31 
   7   8   1   15.99    1.01 
   7   8   1   14.26    0.46 
   7   8   1   15.55    0.38 
  -8  -8  -1    0.18    0.37 
  -8  -8  -1    1.52    0.51 
  -8  -8  -1    0.85    0.42 
  -8  -8  -1    0.58    0.29 
   8   8   1    0.56    0.35 
   8   8   1    0.94    0.26 
   8   8   1    0.89    1.05 
   8   8   1    1.25    0.35 
  -9  -8  -1    4.93    0.46 
  -9  -8  -1    5.00    0.32 
   9   8   1    5.04    0.28 
   9   8   1    3.96    0.47 
   9   8   1    5.82    1.15 
   9   8   1    5.51    0.35 
   9   8   1    5.18    0.39 
 -10  -8  -1    3.41    0.36 
 -10  -8  -1    3.52    0.50 
  10   8   1    3.98    1.25 
  10   8   1    3.27    0.50 
  10   8   1    4.13    0.33 
  10   8   1    3.69    0.44 
  10   8   1    3.54    0.36 
 -11  -8  -1   16.18    0.62 
 -11  -8  -1   16.05    0.45 
  11   8   1   16.11    0.42 
  11   8   1   16.50    0.57 
  11   8   1   15.55    0.48 
  11   8   1   15.97    0.62 
  11   8   1   15.31    1.41 
 -12  -8  -1    0.99    0.41 
 -12  -8  -1    1.06    0.56 
  12   8   1    0.89    0.55 
  12   8   1    1.34    1.44 
  12   8   1    1.69    0.52 
  12   8   1    2.02    0.43 
 -13  -8  -1    2.18    0.44 
 -13  -8  -1    2.88    0.58 
  13   8   1    3.39    1.49 
  13   8   1    3.16    0.56 
  13   8   1    3.52    0.76 
 -14  -8  -1    0.91    0.48 
  14   8   1    0.76    1.57 
  14   8   1    1.09    0.59 
  15   8   1    0.61    0.60 
  15   8   1    0.45    1.65 
  16   8   1    0.65    0.67 
  16   8   1   -0.17    1.72 
  17   8   1    6.53    1.84 
  17   8   1    6.05    0.73 
  18   8   1    2.14    2.25 
  18   8   1    0.65    0.73 
  17  -9  -1    2.40    0.96 
  16  -9  -1    2.27    0.90 
  15  -9  -1    1.03    0.87 
  14  -9  -1    2.60    0.78 
  13  -9  -1    3.02    0.74 
 -13   9   1    2.34    0.71 
  12  -9  -1    1.27    0.72 
  12  -9  -1    2.19    0.68 
 -12   9   1    1.90    0.60 
  11  -9  -1    3.11    0.62 
  11  -9  -1    2.78    0.65 
 -11   9   1    3.07    0.41 
 -11   9   1    2.82    0.56 
  10  -9  -1    0.54    0.65 
  10  -9  -1    1.88    0.63 
 -10   9   1    1.19    0.40 
 -10   9   1    1.66    0.55 
   9  -9  -1    9.74    0.58 
   9  -9  -1   10.17    0.57 
  -9   9   1   10.93    0.52 
  -9   9   1   10.33    0.37 
   8  -9  -1    2.25    0.49 
   8  -9  -1    1.34    0.51 
   8  -9  -1    1.37    0.51 
  -8   9   1    1.24    0.32 
  -8   9   1    2.64    0.48 
   7  -9  -1   21.84    0.57 
   7  -9  -1   21.44    0.60 
   7  -9  -1   20.97    0.60 
  -7   9   1   23.09    0.64 
  -7   9   1   20.86    0.45 
   6  -9  -1    0.83    0.30 
   6  -9  -1    1.52    0.38 
   6  -9  -1    1.35    0.39 
  -6   9   1    1.43    0.26 
  -6   9   1    1.74    0.33 
   5  -9  -1   19.30    0.71 
   5  -9  -1   22.09    0.74 
  -5   9   1   19.62    0.65 
  -5   9   1   20.95    0.79 
   4  -9  -1   20.60    0.39 
  -4   9   1   20.51    0.34 
  -4   9   1   20.38    0.50 
  -3   9   1   28.59    0.76 
  -2   9   1   16.45    0.50 
  -1   9   1    0.96    0.35 
   0  -9  -1   -0.13    0.32 
   0   9   1   -0.42    0.33 
  -1  -9  -1    0.82    0.36 
   1   9   1    1.59    0.38 
  -2  -9  -1   54.68    0.77 
  -2  -9  -1   53.28    0.44 
  -2  -9  -1   52.69    0.73 
   2   9   1   53.30    0.59 
  -3  -9  -1   11.73    0.23 
  -3  -9  -1   11.50    0.26 
  -3  -9  -1   12.18    0.38 
  -3  -9  -1   11.42    0.23 
  -3  -9  -1   12.26    0.19 
   3   9   1   11.41    0.24 
   3   9   1   11.86    0.29 
   3   9   1   11.66    0.37 
  -4  -9  -1    6.63    0.28 
  -4  -9  -1    6.36    0.19 
  -4  -9  -1    6.74    0.25 
  -4  -9  -1    6.40    0.37 
  -4  -9  -1    6.29    0.38 
  -4  -9  -1    6.23    0.24 
   4   9   1    6.07    0.26 
   4   9   1    6.05    0.26 
   4   9   1    6.42    0.35 
  -5  -9  -1    3.69    0.33 
  -5  -9  -1    4.63    0.30 
  -5  -9  -1    4.93    0.45 
  -5  -9  -1    3.03    0.29 
  -5  -9  -1    4.38    0.24 
  -5  -9  -1    4.50    0.41 
   5   9   1    3.93    0.18 
   5   9   1    4.35    0.31 
   5   9   1    3.84    0.31 
   5   9   1    3.18    0.74 
   5   9   1    4.12    0.37 
  -6  -9  -1   45.76    0.66 
  -6  -9  -1   44.30    0.63 
  -6  -9  -1   46.79    0.59 
  -6  -9  -1   44.73    0.52 
  -6  -9  -1   45.63    0.78 
  -6  -9  -1   45.38    0.53 
   6   9   1   46.81    1.12 
   6   9   1   45.47    0.59 
   6   9   1   45.69    0.50 
   6   9   1   45.97    0.66 
   6   9   1   44.28    0.55 
  -7  -9  -1    9.57    0.52 
  -7  -9  -1    9.53    0.50 
  -7  -9  -1    8.55    0.41 
  -7  -9  -1    9.05    0.30 
   7   9   1    9.23    1.00 
   7   9   1    9.21    0.32 
   7   9   1    8.13    0.41 
   7   9   1    9.49    0.41 
  -8  -9  -1   -0.04    0.30 
  -8  -9  -1   -0.19    0.44 
  -8  -9  -1    1.23    0.57 
   8   9   1   -0.35    0.34 
   8   9   1    0.37    0.38 
   8   9   1   -0.51    0.44 
   8   9   1   -0.50    0.99 
  -9  -9  -1    0.37    0.46 
  -9  -9  -1    0.16    0.32 
   9   9   1    0.39    1.15 
   9   9   1    0.48    0.38 
   9   9   1    0.42    0.38 
   9   9   1   -0.20    0.48 
 -10  -9  -1    9.94    0.40 
 -10  -9  -1   10.63    0.54 
 -10  -9  -1    8.67    0.46 
  10   9   1    9.79    0.44 
  10   9   1   10.74    0.56 
  10   9   1   10.63    0.47 
  10   9   1   11.06    1.32 
 -11  -9  -1    5.78    0.43 
 -11  -9  -1    5.75    0.56 
  11   9   1    5.45    0.58 
  11   9   1    5.03    1.38 
  11   9   1    5.44    0.49 
 -12  -9  -1    5.65    0.54 
 -12  -9  -1    5.34    0.42 
  12   9   1    5.87    1.39 
  12   9   1    5.99    0.56 
  12   9   1    6.00    0.49 
 -13  -9  -1    3.94    0.43 
  13   9   1    3.25    1.46 
  13   9   1    4.05    0.54 
  14   9   1    0.91    0.57 
  14   9   1    0.62    1.59 
  15   9   1    4.45    0.63 
  15   9   1    4.67    1.74 
  16   9   1    1.69    0.65 
  16   9   1    0.60    1.79 
  17   9   1    0.10    1.83 
  17   9   1    1.20    0.71 
  18   9   1    2.93    0.77 
  18   9   1    2.12    2.01 
  16 -10  -1    1.14    0.92 
  15 -10  -1    7.88    0.93 
  14 -10  -1    1.20    0.82 
  13 -10  -1    3.26    0.79 
  12 -10  -1   13.33    0.77 
 -12  10   1   13.10    0.66 
  11 -10  -1    0.36    0.65 
  11 -10  -1    0.02    0.72 
 -11  10   1    0.29    0.56 
  10 -10  -1   -0.30    0.57 
  10 -10  -1   -0.25    0.62 
 -10  10   1    0.33    0.51 
 -10  10   1    0.19    0.40 
   9 -10  -1   30.70    0.64 
   9 -10  -1   30.94    0.62 
  -9  10   1   30.61    0.42 
  -9  10   1   31.06    0.52 
   8 -10  -1    1.09    0.49 
   8 -10  -1    1.12    0.38 
   8 -10  -1    1.46    0.51 
  -8  10   1    1.52    0.43 
  -8  10   1    1.13    0.31 
   7 -10  -1   13.61    0.38 
   7 -10  -1   13.34    0.48 
   7 -10  -1   13.37    0.50 
  -7  10   1   13.56    0.33 
  -7  10   1   13.91    0.42 
   6 -10  -1    8.11    0.41 
   6 -10  -1    9.94    0.32 
   6 -10  -1    8.97    0.40 
  -6  10   1    8.62    0.22 
  -6  10   1    9.32    0.29 
  -5  10   1    7.28    0.43 
   4 -10  -1   40.92    0.41 
  -4  10   1   42.08    0.57 
  -3  10   1    0.15    0.40 
  -2  10   1   23.61    0.51 
  -1  10   1    0.81    0.37 
   0 -10  -1   17.27    0.36 
   0  10   1   17.20    0.36 
  -1 -10  -1   15.81    0.81 
   1  10   1   15.85    0.62 
  -2 -10  -1   24.16    0.53 
   2  10   1   25.28    0.59 
  -3 -10  -1   47.96    0.49 
  -3 -10  -1   46.26    0.76 
  -3 -10  -1   47.13    0.46 
  -3 -10  -1   46.90    0.82 
  -3 -10  -1   45.95    0.49 
   3  10   1   47.50    0.64 
   3  10   1   47.02    0.53 
  -4 -10  -1    7.43    0.21 
  -4 -10  -1    7.44    0.28 
  -4 -10  -1    7.27    0.27 
  -4 -10  -1    7.45    0.46 
  -4 -10  -1    7.51    0.44 
  -4 -10  -1    6.70    0.31 
   4  10   1    6.66    0.29 
   4  10   1    6.52    0.39 
   4  10   1    7.07    0.31 
  -5 -10  -1   33.62    0.60 
  -5 -10  -1   31.50    0.63 
  -5 -10  -1   32.75    0.70 
  -5 -10  -1   34.85    1.02 
  -5 -10  -1   31.44    0.84 
  -5 -10  -1   33.98    0.64 
   5  10   1   32.77    0.71 
   5  10   1   32.40    0.68 
   5  10   1   32.85    0.83 
  -6 -10  -1    1.81    0.45 
  -6 -10  -1    2.34    0.36 
  -6 -10  -1    1.88    0.26 
  -6 -10  -1    1.96    0.31 
  -6 -10  -1    2.64    0.50 
  -6 -10  -1    1.96    0.38 
   6  10   1    1.84    0.36 
   6  10   1    1.58    0.85 
   6  10   1    1.74    0.39 
  -7 -10  -1   17.02    0.56 
  -7 -10  -1   16.22    0.40 
  -7 -10  -1   15.67    0.51 
  -7 -10  -1   16.83    0.45 
  -7 -10  -1   16.35    0.32 
   7  10   1   16.84    0.46 
   7  10   1   16.87    0.32 
   7  10   1   16.40    0.42 
   7  10   1   17.08    1.03 
  -8 -10  -1    5.67    0.40 
  -8 -10  -1    6.56    0.33 
  -8 -10  -1    5.94    0.52 
  -8 -10  -1    6.64    0.59 
  -8 -10  -1    6.14    0.45 
   8  10   1    6.61    0.35 
   8  10   1    6.66    1.04 
   8  10   1    5.50    0.44 
   8  10   1    6.40    0.43 
  -9 -10  -1   15.90    0.65 
  -9 -10  -1   15.31    0.38 
  -9 -10  -1   16.13    0.54 
  -9 -10  -1   14.30    0.46 
   9  10   1   16.15    0.54 
   9  10   1   16.21    0.44 
   9  10   1   16.58    1.23 
   9  10   1   15.90    0.49 
 -10 -10  -1   26.47    0.52 
 -10 -10  -1   27.34    0.47 
 -10 -10  -1   27.66    0.60 
  10  10   1   26.87    0.53 
  10  10   1   27.91    0.61 
  10  10   1   27.53    1.37 
  10  10   1   28.03    0.53 
 -11 -10  -1   31.51    0.60 
 -11 -10  -1   32.42    0.47 
  11  10   1   32.51    1.34 
  11  10   1   32.02    0.60 
  11  10   1   32.99    0.54 
 -12 -10  -1    0.30    0.58 
 -12 -10  -1    0.28    0.42 
  12  10   1    0.45    0.51 
  12  10   1    0.11    0.61 
  12  10   1    0.59    1.35 
  13  10   1    3.10    0.53 
  13  10   1    3.22    1.46 
  14  10   1    0.65    0.58 
  14  10   1    1.09    1.56 
  15  10   1    1.26    0.63 
  15  10   1    1.72    1.66 
  16  10   1    1.59    1.77 
  16  10   1    1.03    0.64 
  17  10   1    2.26    1.96 
  16 -11  -1    1.57    1.01 
  15 -11  -1    3.08    1.06 
  14 -11  -1    2.33    0.89 
  13 -11  -1    1.50    0.85 
  12 -11  -1   14.64    0.86 
  11 -11  -1    2.10    0.75 
 -11  11   1    0.61    0.58 
  10 -11  -1    4.01    0.66 
  10 -11  -1    4.24    0.64 
 -10  11   1    4.53    0.53 
 -10  11   1    4.59    0.38 
   9 -11  -1   23.60    0.68 
   9 -11  -1   23.96    0.63 
  -9  11   1   23.69    0.45 
  -9  11   1   23.79    0.54 
   8 -11  -1    0.15    0.56 
   8 -11  -1    0.50    0.47 
  -8  11   1    0.71    0.42 
  -8  11   1   -0.09    0.29 
   7 -11  -1    3.14    0.49 
   7 -11  -1    4.07    0.34 
   7 -11  -1    3.62    0.41 
  -7  11   1    4.14    0.31 
  -7  11   1    3.49    0.28 
   6 -11  -1    0.10    0.30 
   6 -11  -1   -1.34    0.43 
  -6  11   1   -0.81    0.24 
  -6  11   1   -0.56    0.21 
  -5  11   1    4.48    0.46 
  -4  11   1    3.50    0.50 
  -3  11   1    1.24    0.46 
  -2  11   1    8.86    0.42 
  -1  11   1   19.21    0.63 
   0 -11  -1    5.42    0.43 
   0  11   1    6.28    0.45 
  -1 -11  -1   12.42    0.46 
   1  11   1   12.93    0.47 
  -2 -11  -1    9.48    0.44 
  -2 -11  -1    9.83    0.49 
   2  11   1    9.93    0.45 
  -3 -11  -1   33.67    0.48 
  -3 -11  -1   31.29    0.52 
  -3 -11  -1   33.44    0.53 
  -3 -11  -1   31.26    0.66 
  -3 -11  -1   33.42    0.87 
   3  11   1   32.71    0.67 
  -4 -11  -1   17.50    0.48 
  -4 -11  -1   17.62    0.50 
  -4 -11  -1   17.55    0.32 
  -4 -11  -1   17.64    0.30 
  -4 -11  -1   17.68    0.23 
  -4 -11  -1   16.90    0.30 
   4  11   1   17.56    0.50 
   4  11   1   17.14    0.31 
   4  11   1   16.97    0.44 
  -5 -11  -1   22.67    0.60 
  -5 -11  -1   21.03    0.69 
  -5 -11  -1   22.56    0.93 
  -5 -11  -1   22.61    0.64 
  -5 -11  -1   22.79    1.09 
  -5 -11  -1   20.36    0.64 
   5  11   1   21.14    0.68 
   5  11   1   21.16    0.73 
  -6 -11  -1    0.12    0.27 
  -6 -11  -1   -0.03    0.38 
  -6 -11  -1    0.26    0.55 
  -6 -11  -1    0.53    0.38 
  -6 -11  -1   -0.02    0.34 
  -6 -11  -1   -0.16    0.50 
   6  11   1    0.05    0.44 
   6  11   1    0.11    0.36 
  -7 -11  -1    2.79    0.42 
  -7 -11  -1    3.82    0.59 
  -7 -11  -1    3.60    0.57 
  -7 -11  -1    2.65    0.38 
  -7 -11  -1    3.12    0.29 
  -7 -11  -1    3.56    0.55 
   7  11   1    3.28    0.93 
   7  11   1    2.66    0.40 
   7  11   1    2.56    0.43 
   7  11   1    3.37    0.24 
  -8 -11  -1    1.56    0.43 
  -8 -11  -1    0.92    0.56 
  -8 -11  -1    2.28    0.63 
  -8 -11  -1    1.74    0.34 
  -8 -11  -1    1.88    0.47 
   8  11   1    1.13    0.46 
   8  11   1    1.89    0.34 
   8  11   1    0.97    1.05 
   8  11   1    1.89    0.47 
  -9 -11  -1    1.88    0.68 
  -9 -11  -1    1.31    0.37 
  -9 -11  -1    0.66    0.43 
  -9 -11  -1    1.34    0.50 
   9  11   1    0.49    1.11 
   9  11   1    0.78    0.46 
   9  11   1    1.27    0.48 
   9  11   1    1.65    0.38 
 -10 -11  -1    1.13    0.54 
 -10 -11  -1    0.46    0.38 
 -10 -11  -1    0.45    0.45 
  10  11   1    0.56    0.48 
  10  11   1    0.36    0.50 
  10  11   1    1.53    0.44 
  10  11   1    0.96    1.19 
 -11 -11  -1    2.81    0.41 
 -11 -11  -1    2.72    0.56 
  11  11   1    2.77    0.52 
  11  11   1    2.98    0.45 
  11  11   1    3.50    1.27 
  12  11   1    5.79    1.38 
  12  11   1    4.09    0.50 
  13  11   1    2.16    0.53 
  13  11   1    2.94    1.42 
  14  11   1    2.02    1.50 
  14  11   1    0.90    0.57 
  15  11   1    3.89    1.65 
  16  11   1    0.91    1.69 
  17  11   1    4.38    1.89 
  15 -12  -1    2.08    0.99 
  14 -12  -1    1.28    0.90 
  13 -12  -1    1.54    0.89 
  12 -12  -1    1.28    0.85 
  11 -12  -1    1.91    0.72 
  10 -12  -1   -0.64    0.70 
   9 -12  -1    4.42    0.53 
   9 -12  -1    4.32    0.68 
  -9  12   1    4.90    0.36 
  -9  12   1    4.10    0.43 
   8 -12  -1    0.73    0.61 
   8 -12  -1    0.40    0.46 
  -8  12   1    0.63    0.40 
  -8  12   1    0.55    0.32 
   7 -12  -1    7.55    0.39 
   7 -12  -1    7.34    0.50 
  -7  12   1    7.62    0.29 
   6 -12  -1   12.69    0.47 
   6 -12  -1   13.19    0.33 
  -6  12   1   11.92    0.27 
   5 -12  -1    4.87    0.38 
  -4  12   1    3.22    0.47 
  -3  12   1    5.81    0.47 
  -2  12   1    4.66    0.47 
   1 -12  -1   -0.82    0.45 
  -1  12   1    0.38    0.45 
   0 -12  -1   12.81    0.55 
   0  12   1   14.47    0.56 
  -1 -12  -1   23.37    0.60 
   1  12   1   25.71    0.65 
  -2 -12  -1    0.67    0.49 
   2  12   1    1.60    0.48 
  -3 -12  -1    9.68    0.52 
  -3 -12  -1    9.22    0.19 
  -3 -12  -1    9.17    0.28 
   3  12   1    9.53    0.47 
  -4 -12  -1    2.00    0.31 
  -4 -12  -1    3.71    0.33 
  -4 -12  -1    2.99    0.34 
  -4 -12  -1    3.30    0.52 
  -4 -12  -1    3.15    0.23 
   4  12   1    2.97    0.32 
   4  12   1    2.98    0.47 
  -5 -12  -1    0.03    0.25 
  -5 -12  -1    0.51    0.54 
  -5 -12  -1   -0.59    0.33 
  -5 -12  -1    0.04    0.35 
  -5 -12  -1    0.37    0.33 
   5  12   1   -0.04    0.46 
   5  12   1   -0.28    0.33 
  -6 -12  -1   -0.16    0.35 
  -6 -12  -1    0.50    0.55 
  -6 -12  -1    0.28    0.27 
  -6 -12  -1    0.73    0.38 
  -6 -12  -1   -0.49    0.38 
   6  12   1    0.05    0.35 
   6  12   1   -0.13    0.44 
  -7 -12  -1    9.93    0.34 
  -7 -12  -1    9.27    0.40 
  -7 -12  -1   10.33    0.45 
  -7 -12  -1   10.42    0.66 
  -7 -12  -1   10.90    0.56 
   7  12   1   10.38    0.44 
   7  12   1   10.11    0.50 
  -8 -12  -1    2.61    0.64 
  -8 -12  -1    2.60    0.32 
  -8 -12  -1    2.32    0.43 
  -8 -12  -1    2.90    0.47 
   8  12   1    2.42    1.00 
   8  12   1    2.67    0.49 
   8  12   1    2.39    0.43 
  -9 -12  -1    5.32    0.55 
  -9 -12  -1    6.00    0.39 
  -9 -12  -1    4.91    0.47 
  -9 -12  -1    5.13    0.71 
   9  12   1    5.62    0.50 
   9  12   1    5.80    0.54 
   9  12   1    6.00    0.38 
   9  12   1    5.45    1.15 
 -10 -12  -1    1.98    0.46 
 -10 -12  -1    1.13    0.51 
 -10 -12  -1    1.67    0.40 
 -10 -12  -1    0.30    0.69 
  10  12   1    2.19    0.49 
  10  12   1    1.46    0.38 
  10  12   1    1.93    1.16 
 -11 -12  -1   15.82    0.59 
  11  12   1   16.45    0.52 
  11  12   1   18.31    1.33 
  11  12   1   16.66    0.62 
  12  12   1    1.88    1.34 
  13  12   1    3.08    1.40 
  14  12   1    6.88    1.48 
  15  12   1    3.50    1.62 
  16  12   1    3.26    1.71 
  14 -13  -1    3.08    1.02 
  13 -13  -1    3.09    0.93 
  12 -13  -1    1.83    0.88 
  11 -13  -1    1.44    0.81 
  10 -13  -1    0.96    0.75 
   9 -13  -1    7.99    0.67 
  -9  13   1    7.17    0.40 
   8 -13  -1    7.43    0.52 
   8 -13  -1    8.13    0.62 
  -8  13   1    7.57    0.34 
   7 -13  -1    9.92    0.56 
  -7  13   1    9.85    0.29 
   6 -13  -1    0.94    0.46 
   5 -13  -1    4.04    0.40 
  -4  13   1    0.20    0.49 
  -3  13   1    9.71    0.52 
  -2  13   1    0.37    0.46 
   1 -13  -1   34.68    0.64 
  -1  13   1   37.06    0.66 
   0 -13  -1    0.07    0.50 
   0  13   1    0.76    0.50 
  -1 -13  -1   62.08    1.20 
   1  13   1   61.79    0.88 
  -2 -13  -1    0.74    0.51 
   2  13   1    1.28    0.49 
  -3 -13  -1    9.71    0.33 
  -3 -13  -1    9.31    0.59 
   3  13   1    9.92    0.54 
  -4 -13  -1    1.93    0.56 
  -4 -13  -1    2.05    0.22 
  -4 -13  -1    1.24    0.31 
  -4 -13  -1    1.87    0.32 
   4  13   1    2.11    0.49 
  -5 -13  -1    1.85    0.38 
  -5 -13  -1    1.23    0.33 
  -5 -13  -1    2.02    0.57 
  -5 -13  -1    1.34    0.38 
  -5 -13  -1    1.43    0.25 
   5  13   1    1.50    0.48 
   5  13   1    0.84    0.33 
  -6 -13  -1    7.59    0.40 
  -6 -13  -1    6.51    0.36 
  -6 -13  -1    6.16    0.38 
  -6 -13  -1    6.57    0.29 
  -6 -13  -1    6.71    0.59 
   6  13   1    6.87    0.39 
   6  13   1    6.70    0.48 
  -7 -13  -1    0.90    0.45 
  -7 -13  -1    0.37    0.66 
  -7 -13  -1    0.14    0.31 
  -7 -13  -1    0.42    0.40 
   7  13   1    0.57    0.39 
   7  13   1    0.22    0.48 
  -8 -13  -1    2.65    0.44 
  -8 -13  -1    2.79    0.47 
  -8 -13  -1    3.59    0.70 
  -8 -13  -1    3.04    0.34 
   8  13   1    3.20    0.51 
   8  13   1    2.72    0.46 
  -9 -13  -1    2.09    0.43 
  -9 -13  -1    2.24    0.72 
  -9 -13  -1    2.77    0.50 
   9  13   1    3.30    0.50 
   9  13   1    3.63    0.51 
 -10 -13  -1    9.98    0.54 
 -10 -13  -1    9.91    0.46 
 -10 -13  -1    8.65    0.75 
  10  13   1   11.68    1.15 
  10  13   1   10.69    0.51 
  11  13   1    2.15    1.24 
  12  13   1    2.12    1.26 
  13  13   1    2.73    1.36 
  14  13   1    3.37    1.50 
  15  13   1    2.64    1.52 
  16  13   1    4.50    1.75 
  13 -14  -1    2.29    0.99 
  12 -14  -1    1.58    0.91 
  11 -14  -1    4.14    0.87 
  10 -14  -1    2.13    0.77 
   9 -14  -1   10.46    0.84 
  -9  14   1    8.68    0.50 
   8 -14  -1    1.46    0.71 
  -8  14   1    1.04    0.32 
   7 -14  -1    3.78    0.61 
   6 -14  -1    4.37    0.49 
   5 -14  -1    1.30    0.45 
  -3  14   1    9.11    0.57 
  -2  14   1    3.90    0.55 
   1 -14  -1    7.27    0.53 
  -1  14   1    7.47    0.54 
   0 -14  -1    0.80    0.54 
   0  14   1    0.20    0.51 
  -1 -14  -1    4.45    0.54 
   1  14   1    4.01    0.47 
  -2 -14  -1    1.13    0.56 
   2  14   1    1.64    0.52 
  -3 -14  -1   11.29    0.31 
  -3 -14  -1   12.06    0.58 
   3  14   1   13.06    0.54 
  -4 -14  -1    0.57    0.33 
  -4 -14  -1    0.27    0.22 
  -4 -14  -1    0.08    0.59 
  -4 -14  -1    0.18    0.31 
   4  14   1    0.28    0.49 
  -5 -14  -1    2.14    0.26 
  -5 -14  -1    1.98    0.34 
  -5 -14  -1    1.89    0.37 
  -5 -14  -1    2.08    0.62 
   5  14   1    2.06    0.35 
   5  14   1    2.15    0.51 
  -6 -14  -1    2.10    0.30 
  -6 -14  -1    1.87    0.37 
  -6 -14  -1    1.89    0.41 
  -6 -14  -1    1.81    0.62 
   6  14   1    1.81    0.37 
   6  14   1    2.02    0.49 
  -7 -14  -1   12.53    0.42 
  -7 -14  -1   11.78    0.73 
  -7 -14  -1   12.16    0.34 
  -7 -14  -1   12.10    0.45 
   7  14   1   12.46    0.56 
   7  14   1   12.74    0.46 
  -8 -14  -1    0.48    0.45 
  -8 -14  -1    0.20    0.48 
  -8 -14  -1   -0.67    0.71 
   8  14   1    0.18    0.46 
   8  14   1    0.75    0.55 
  -9 -14  -1    1.24    0.73 
  -9 -14  -1    2.75    0.47 
  -9 -14  -1    3.04    0.50 
   9  14   1    2.80    0.48 
 -10 -14  -1    0.26    0.49 
 -10 -14  -1    0.17    0.53 
  10  14   1    0.46    0.56 
  12  14   1    3.37    1.23 
  13  14   1    5.27    1.35 
  14  14   1    4.20    1.55 
  15  14   1    5.45    1.56 
  13 -15  -1    2.87    0.93 
  12 -15  -1    2.12    0.92 
  11 -15  -1    2.12    0.82 
  10 -15  -1    3.02    0.93 
   9 -15  -1    5.11    0.79 
   8 -15  -1   17.67    0.83 
   7 -15  -1    2.63    0.65 
   6 -15  -1    3.50    0.59 
   5 -15  -1    3.64    0.52 
   2 -15  -1   -0.14    0.53 
  -2  15   1    0.46    0.57 
   1 -15  -1   17.04    0.64 
  -1  15   1   18.21    0.67 
   0 -15  -1    0.35    0.56 
   0  15   1    0.68    0.53 
  -1 -15  -1   26.36    0.66 
   1  15   1   27.24    0.64 
  -2 -15  -1   -0.39    0.58 
   2  15   1    0.20    0.53 
  -3 -15  -1    0.46    0.62 
   3  15   1    0.76    0.52 
  -4 -15  -1    5.62    0.63 
  -4 -15  -1    5.91    0.34 
   4  15   1    5.49    0.54 
  -5 -15  -1    4.67    0.37 
  -5 -15  -1    4.55    0.67 
  -5 -15  -1    4.84    0.26 
   5  15   1    4.78    0.56 
  -6 -15  -1   13.11    0.68 
  -6 -15  -1   14.32    0.31 
  -6 -15  -1   13.53    0.42 
  -6 -15  -1   13.96    0.40 
   6  15   1   14.32    0.41 
   6  15   1   14.28    0.55 
  -7 -15  -1    0.33    0.42 
  -7 -15  -1   -0.44    0.44 
  -7 -15  -1   -1.00    0.72 
   7  15   1   -0.09    0.53 
   7  15   1    0.15    0.40 
  -8 -15  -1    4.15    0.47 
  -8 -15  -1    2.97    0.77 
  -8 -15  -1    4.13    0.44 
   8  15   1    3.98    0.45 
  -9 -15  -1    1.79    0.48 
  -9 -15  -1    2.30    0.47 
   9  15   1    2.72    0.48 
  14  15   1    4.15    1.48 
  12 -16  -1    2.93    1.02 
  10 -16  -1    2.00    0.87 
   9 -16  -1   20.72    0.89 
   8 -16  -1    5.24    0.67 
   7 -16  -1    3.01    0.65 
   6 -16  -1    1.31    0.56 
   2 -16  -1    2.72    0.57 
   1 -16  -1    1.22    0.59 
  -1  16   1    0.69    0.56 
   0 -16  -1    0.66    0.59 
   0  16   1    0.85    0.58 
  -1 -16  -1    0.02    0.58 
   1  16   1    0.25    0.55 
  -2 -16  -1   11.59    0.65 
   2  16   1   11.17    0.57 
  -3 -16  -1    0.67    0.64 
   3  16   1    1.43    0.57 
  -4 -16  -1    2.56    0.36 
  -4 -16  -1    2.19    0.66 
   4  16   1    3.11    0.60 
  -5 -16  -1    5.67    0.30 
  -5 -16  -1    4.81    0.70 
  -5 -16  -1    5.31    0.40 
   5  16   1    6.05    0.58 
  -6 -16  -1    0.75    0.43 
  -6 -16  -1   -0.87    0.67 
   6  16   1    1.60    0.65 
  -7 -16  -1   -0.60    0.44 
  -7 -16  -1    0.28    0.41 
   7  16   1    0.16    0.45 
  -8 -16  -1    1.96    0.50 
  -8 -16  -1    2.44    0.45 
   8  16   1    3.04    0.45 
  -9 -16  -1    2.53    0.48 
  -9 -16  -1    2.21    0.55 
   9  16   1    2.56    0.48 
   9 -17  -1    2.70    0.80 
   8 -17  -1    2.43    0.77 
   7 -17  -1    5.14    0.66 
   6 -17  -1    1.63    0.61 
   3 -17  -1    1.98    0.59 
   2 -17  -1    0.24    0.58 
   1 -17  -1    0.11    0.58 
   0 -17  -1   -0.23    0.61 
  -1 -17  -1   -0.47    0.61 
  -2 -17  -1   -0.46    0.65 
   2  17   1    0.04    0.59 
  -3 -17  -1   -0.79    0.66 
   3  17   1    0.15    0.57 
  -4 -17  -1    1.89    0.36 
  -4 -17  -1    1.54    0.67 
   4  17   1    2.54    0.61 
  -5 -17  -1    4.82    0.74 
  -5 -17  -1    5.26    0.39 
  -6 -17  -1    0.03    0.41 
  -6 -17  -1   -1.23    0.72 
  -7 -17  -1    3.80    0.45 
  -7 -17  -1    1.67    0.82 
   7  17   1    3.57    0.42 
  -8 -17  -1    0.26    0.44 
  -8 -17  -1   -0.54    0.46 
   8  17   1   -0.02    0.47 
  10 -18  -1    2.11    0.86 
   4 -18  -1    2.84    0.63 
   3 -18  -1    1.28    0.60 
   2 -18  -1    0.72    0.61 
   1 -18  -1    4.97    0.62 
   0 -18  -1   -0.81    0.61 
  -1 -18  -1    0.16    0.65 
  -2 -18  -1   -0.70    0.67 
  -3 -18  -1    1.04    0.69 
  -4 -18  -1   -0.97    0.70 
  -4 -18  -1    0.63    0.36 
  -5 -18  -1    1.38    0.40 
  -5 -18  -1   -1.14    0.74 
  -6 -18  -1    1.67    0.46 
  -6 -18  -1   -0.91    0.74 
  -7 -18  -1    1.50    0.45 
   8  18   1    0.55    0.47 
   4 -19  -1    3.50    0.67 
   3 -19  -1    3.67    0.69 
   2 -19  -1    0.90    0.65 
   1 -19  -1    0.77    0.70 
   0 -19  -1    1.74    0.67 
  -1 -19  -1    0.31    0.69 
  -2 -19  -1   -1.09    0.72 
  -3 -19  -1   -1.42    0.73 
  -5 -19  -1   -0.49    0.77 
   5 -20  -1    2.80    0.72 
   4 -20  -1    3.18    0.74 
   3 -20  -1    5.72    0.69 
   2 -20  -1    1.05    0.73 
   1 -20  -1    3.45    0.71 
   0 -20  -1   -1.40    0.70 
  -1 -20  -1   -1.77    0.72 
  -2 -20  -1   -1.90    0.76 
  -7 -20  -1    1.89    0.99 
   3 -21  -1    1.70    0.74 
   2 -21  -1    0.14    0.75 
   1 -21  -1   -0.47    0.75 
   0 -21  -1    0.41    0.75 
  -1 -21  -1   -0.93    0.79 
  -2 -21   2    0.09    0.81 
   0 -21   2    3.94    0.78 
   1 -21   2    2.81    0.76 
   2 -21   2    1.99    0.77 
   3 -21   2    1.19    0.79 
  -8 -20   2    2.80    0.63 
  -7 -20   2    0.14    0.51 
  -6 -20   2    2.03    0.53 
  -4 -20   2   -0.62    0.80 
  -3 -20   2   -1.83    0.79 
  -2 -20   2   -0.71    0.77 
  -1 -20   2   -0.75    0.74 
   0 -20   2   -0.77    0.71 
   1 -20   2    4.21    0.71 
   2 -20   2    1.12    0.70 
   3 -20   2    4.50    0.70 
   4 -20   2    2.49    0.68 
   5 -20   2    4.11    0.67 
  -9 -19   2    1.31    0.65 
  -8 -19   2   -0.05    0.50 
  -7 -19   2   -0.30    0.51 
  -6 -19   2   -0.07    0.46 
  -5 -19   2   -0.35    0.46 
  -4 -19   2    1.57    0.44 
  -2 -19   2   -1.25    0.73 
  -1 -19   2    0.19    0.68 
   0 -19   2    0.16    0.67 
   1 -19   2    1.57    0.67 
   2 -19   2    2.26    0.64 
   3 -19   2    4.72    0.69 
   4 -19   2    1.45    0.65 
 -11 -18   2    0.35    0.57 
 -10 -18   2    1.54    0.59 
  -9 -18   2    0.73    0.55 
  -8 -18   2    2.92    0.49 
   7  18  -2   -0.24    0.41 
  -7 -18   2    0.13    0.52 
  -6 -18   2   -0.24    0.51 
  -6 -18   2   -1.42    0.81 
  -5 -18   2    1.81    0.75 
  -5 -18   2    2.68    0.43 
  -4 -18   2   -0.15    0.40 
  -4 -18   2   -0.50    0.75 
  -3 -18   2   -0.20    0.72 
  -3 -18   2    0.52    0.37 
  -2 -18   2   -0.89    0.70 
  -1 -18   2   -0.06    0.68 
   0 -18   2   -0.36    0.67 
   1 -18   2    1.73    0.63 
   2 -18   2    0.82    0.64 
   3 -18   2    1.62    0.63 
   9 -18   2    2.32    0.81 
 -12 -17   2    1.23    0.60 
 -11 -17   2    1.34    0.57 
 -10 -17   2    0.59    0.59 
  -9 -17   2    7.70    0.54 
   8  17  -2    0.25    0.49 
  -8 -17   2    0.06    0.53 
   7  17  -2    2.07    0.46 
  -7 -17   2    1.48    0.51 
  -6 -17   2    0.26    0.76 
  -6 -17   2    1.64    0.51 
  -5 -17   2   10.41    0.74 
  -5 -17   2   11.76    0.28 
  -5 -17   2   11.13    0.45 
  -4 -17   2   -0.18    0.39 
  -4 -17   2   -0.73    0.70 
  -3 -17   2   18.14    0.75 
  -3 -17   2   18.78    0.40 
  -2 -17   2    2.77    0.69 
  -1 -17   2    9.39    0.66 
   0 -17   2    2.53    0.61 
   1 -17   2    0.51    0.62 
   2 -17   2    5.21    0.59 
   3 -17   2    3.44    0.60 
   7 -17   2    2.80    0.66 
   8 -17   2    6.81    0.73 
   9 -17   2    1.66    0.76 
  10 -17   2    1.49    0.84 
  11 -17   2    1.90    0.86 
 -13 -16   2    3.60    0.70 
 -12 -16   2    0.60    0.58 
 -11 -16   2    7.12    0.61 
 -10 -16   2    0.67    0.60 
  -9 -16   2    8.07    0.56 
  -9 -16   2    5.07    0.93 
   8  16  -2    5.45    0.48 
  -8 -16   2    4.88    0.51 
   7  16  -2    0.63    0.43 
  -7 -16   2    0.20    0.45 
   6  16  -2    6.95    0.42 
  -6 -16   2    4.89    0.72 
  -6 -16   2    6.14    0.45 
  -5 -16   2   16.52    0.29 
  -5 -16   2   14.83    0.71 
  -5 -16   2   16.04    0.42 
  -4 -16   2   10.33    0.73 
  -4 -16   2   10.90    0.26 
  -4 -16   2   10.89    0.40 
  -3 -16   2    1.46    0.38 
  -3 -16   2    1.47    0.68 
  -2 -16   2    7.29    0.68 
  -1 -16   2    8.72    0.63 
   0 -16   2    2.41    0.60 
   1 -16   2    0.39    0.57 
   2 -16   2    1.85    0.56 
   6 -16   2    4.76    0.56 
   7 -16   2   -0.13    0.62 
   8 -16   2    1.05    0.72 
  10 -16   2    0.55    0.81 
  11 -16   2    1.07    0.83 
 -14 -15   2    0.93    0.64 
 -13 -15   2    0.91    0.62 
 -12 -15   2    6.94    0.67 
 -11 -15   2    5.43    0.56 
 -10 -15   2    3.63    0.59 
   9  15  -2    3.58    0.50 
  -9 -15   2    1.27    0.81 
  -9 -15   2    3.34    0.54 
   8  15  -2    0.18    0.45 
  -8 -15   2   -0.10    0.49 
  -8 -15   2   -1.99    0.82 
   7  15  -2    0.22    0.42 
  -7 -15   2   -1.71    0.67 
  -7 -15   2    0.20    0.48 
   6  15  -2    4.26    0.40 
  -6 -15   2    3.67    0.72 
  -6 -15   2    4.40    0.44 
  -5 -15   2    7.01    0.71 
  -5 -15   2    8.92    0.40 
  -5 -15   2    8.31    0.45 
  -4 -15   2   31.49    0.69 
  -4 -15   2   31.61    0.26 
  -4 -15   2   31.90    0.42 
  -3 -15   2    4.02    0.35 
  -3 -15   2    4.27    0.64 
  -2 -15   2    0.38    0.61 
  -1 -15   2    2.77    0.63 
   0 -15   2    0.48    0.58 
   1 -15   2    0.66    0.56 
   6 -15   2    1.03    0.57 
   7 -15   2    4.12    0.64 
   8 -15   2    0.29    0.63 
   9 -15   2    0.76    0.74 
  10 -15   2    1.66    0.80 
  11 -15   2    2.69    0.87 
  12 -15   2    1.63    0.92 
  13 -15   2    1.85    0.93 
 -14 -14   2    0.87    0.60 
 -13 -14   2    2.77    0.59 
 -12 -14   2    0.38    0.58 
 -11 -14   2   27.68    0.63 
 -11 -14   2   25.78    0.93 
 -10 -14   2    0.98    0.79 
 -10 -14   2    2.87    0.55 
   9  14  -2    0.44    0.49 
  -9 -14   2    0.03    0.50 
  -9 -14   2    0.05    0.51 
  -9 -14   2   -1.22    0.82 
   8  14  -2    0.94    0.47 
  -8 -14   2    0.19    0.52 
  -8 -14   2    0.15    0.76 
  -8 -14   2    1.18    0.49 
   7  14  -2    0.30    0.43 
  -7 -14   2    0.19    0.44 
  -7 -14   2   -0.71    0.68 
   6  14  -2    1.98    0.40 
  -6 -14   2    1.95    0.34 
  -6 -14   2    1.80    0.69 
  -6 -14   2    2.13    0.42 
   5  14  -2    1.77    0.37 
  -5 -14   2    1.99    0.32 
  -5 -14   2    1.74    0.65 
  -5 -14   2    1.81    0.39 
  -4 -14   2    6.28    0.37 
  -4 -14   2    6.15    0.63 
  -4 -14   2    6.34    0.30 
  -3 -14   2    5.32    0.42 
  -3 -14   2    5.04    0.34 
  -3 -14   2    4.45    0.60 
  -3 -14   2    5.13    0.23 
  -2 -14   2    5.41    0.57 
  -1 -14   2    0.98    0.53 
   0 -14   2    6.07    0.54 
   1 -14   2    6.42    0.54 
   5 -14   2    8.18    0.46 
   6 -14   2    1.73    0.50 
   7 -14   2    0.49    0.58 
  -8  14  -2    1.92    0.28 
   8 -14   2    3.01    0.69 
   9 -14   2    1.85    0.74 
  10 -14   2    1.13    0.76 
  11 -14   2    1.11    0.86 
  12 -14   2    1.55    0.91 
  13 -14   2    2.51    1.02 
  14 -14   2    1.44    1.09 
  15  13  -2    7.43    1.58 
  14  13  -2    9.27    1.45 
 -14 -13   2    5.27    0.59 
  13  13  -2    4.33    1.38 
 -13 -13   2    0.27    0.57 
 -12 -13   2    0.49    0.55 
 -11 -13   2   -0.55    0.82 
 -11 -13   2    0.88    0.52 
  10  13  -2    0.89    0.53 
 -10 -13   2    0.38    0.57 
 -10 -13   2    0.36    0.50 
 -10 -13   2   -1.46    0.75 
   9  13  -2    9.76    0.46 
  -9 -13   2    9.59    0.52 
  -9 -13   2    8.55    0.74 
  -9 -13   2    9.63    0.47 
   8  13  -2   20.36    0.46 
  -8 -13   2   21.13    0.50 
  -8 -13   2   20.05    0.52 
  -8 -13   2   20.63    0.39 
  -8 -13   2   19.96    0.76 
   7  13  -2   11.76    0.46 
  -7 -13   2   11.36    0.48 
  -7 -13   2   11.19    0.66 
  -7 -13   2   11.91    0.39 
  -7 -13   2   11.54    0.46 
   6  13  -2    1.51    0.38 
  -6 -13   2    1.76    0.32 
  -6 -13   2    1.99    0.39 
  -6 -13   2    1.71    0.62 
   5  13  -2    0.05    0.34 
  -5 -13   2    0.04    0.29 
  -5 -13   2    0.15    0.35 
  -5 -13   2    0.95    0.39 
  -5 -13   2    0.41    0.59 
  -4 -13   2    2.34    0.57 
  -4 -13   2    2.70    0.39 
  -4 -13   2    2.40    0.27 
  -4 -13   2    2.19    0.33 
  -3 -13   2   19.39    0.29 
  -3 -13   2   19.17    0.38 
  -3 -13   2   19.01    0.26 
  -3 -13   2   18.42    0.59 
  -3 -13   2   18.83    0.35 
  -2 -13   2   43.91    0.65 
  -1 -13   2    0.15    0.51 
   0 -13   2    5.05    0.53 
   1 -13   2    4.50    0.49 
   5 -13   2    1.05    0.43 
   6 -13   2    1.05    0.53 
  -7  13  -2    1.21    0.30 
   7 -13   2    0.52    0.57 
  -8  13  -2    1.66    0.33 
  -8  13  -2    1.36    0.18 
   8 -13   2    1.02    0.59 
  -9  13  -2   -0.49    0.36 
   9 -13   2   -0.22    0.62 
  10 -13   2    0.12    0.69 
  11 -13   2    0.33    0.76 
  12 -13   2    0.96    0.88 
  13 -13   2    0.96    0.96 
  14 -13   2    0.58    1.02 
  16  12  -2    4.02    1.69 
  15  12  -2    2.79    1.53 
  14  12  -2    2.54    1.43 
 -14 -12   2   -0.19    0.54 
  13  12  -2    3.37    1.35 
 -13 -12   2    1.53    0.56 
  12  12  -2    3.62    1.28 
 -12 -12   2    0.68    0.54 
  11  12  -2   17.51    1.26 
 -11 -12   2   15.45    0.58 
 -11 -12   2   13.01    0.80 
  10  12  -2    6.55    0.53 
  10  12  -2    6.76    0.55 
 -10 -12   2    5.88    0.55 
 -10 -12   2    4.86    0.72 
 -10 -12   2    6.66    0.51 
   9  12  -2    1.22    0.47 
   9  12  -2    1.35    0.36 
  -9 -12   2    1.04    0.72 
  -9 -12   2    1.34    0.53 
  -9 -12   2    0.87    0.38 
  -9 -12   2    1.27    0.47 
  -9 -12   2    0.50    0.54 
   8  12  -2    3.21    0.31 
   8  12  -2    2.91    0.43 
  -8 -12   2    2.67    0.36 
  -8 -12   2    1.96    0.52 
  -8 -12   2    2.51    0.50 
  -8 -12   2    2.56    0.45 
  -8 -12   2    2.96    0.71 
   7  12  -2    0.30    0.40 
  -7 -12   2    0.88    0.60 
  -7 -12   2   -0.19    0.49 
  -7 -12   2    0.43    0.42 
  -7 -12   2    0.40    0.34 
  -7 -12   2    0.64    0.45 
   6  12  -2    9.30    0.37 
  -6 -12   2    9.14    0.58 
  -6 -12   2    9.86    0.41 
  -6 -12   2    9.36    0.42 
  -6 -12   2    9.99    0.53 
  -6 -12   2    9.37    0.37 
  -6 -12   2    9.27    0.31 
   5  12  -2    0.25    0.34 
  -5 -12   2    0.59    0.61 
  -5 -12   2   -0.02    0.35 
  -5 -12   2    0.16    0.55 
  -5 -12   2    0.33    0.28 
  -5 -12   2    0.97    0.39 
   4  12  -2    5.81    0.31 
  -4 -12   2    5.75    0.54 
  -4 -12   2    5.95    0.34 
  -4 -12   2    6.47    0.36 
  -4 -12   2    5.83    0.25 
  -3 -12   2    6.28    0.33 
  -3 -12   2    5.31    0.52 
  -3 -12   2    5.93    0.31 
  -3 -12   2    5.65    0.23 
  -2 -12   2   16.68    0.50 
  -1 -12   2    2.17    0.51 
   0 -12   2    1.03    0.49 
   4 -12   2    4.39    0.33 
   5 -12   2   38.92    0.54 
   5 -12   2   38.83    0.61 
  -6  12  -2   -0.47    0.25 
   6 -12   2   -0.07    0.31 
   6 -12   2   -0.43    0.50 
  -7  12  -2   15.53    0.34 
   7 -12   2   16.43    0.39 
   7 -12   2   15.27    0.45 
   7 -12   2   15.31    0.58 
  -8  12  -2    0.57    0.35 
  -8  12  -2    1.02    0.44 
   8 -12   2    0.52    0.39 
   8 -12   2    0.01    0.62 
   8 -12   2    0.73    0.46 
  -9  12  -2   16.37    0.37 
  -9  12  -2   16.55    0.50 
   9 -12   2   16.48    0.65 
   9 -12   2   16.36    0.53 
  10 -12   2    1.58    0.74 
  11 -12   2    1.57    0.72 
  12 -12   2    3.21    0.81 
  13 -12   2    2.46    0.89 
  14 -12   2    1.14    1.00 
  15 -12   2    1.23    0.97 
  16  11  -2    5.18    1.76 
  15  11  -2    4.44    1.52 
  14  11  -2    4.39    1.49 
  13  11  -2    6.58    1.38 
  13  11  -2    4.40    0.56 
 -13 -11   2    4.43    0.51 
  12  11  -2    1.79    1.29 
 -12 -11   2    0.83    0.52 
  11  11  -2    3.74    1.18 
  11  11  -2    2.93    0.54 
  11  11  -2    2.54    0.44 
 -11 -11   2    1.05    0.70 
 -11 -11   2    2.29    0.57 
 -11 -11   2    2.00    0.47 
  10  11  -2    1.37    1.12 
  10  11  -2    0.93    0.42 
  10  11  -2    0.99    0.50 
 -10 -11   2    0.33    0.54 
 -10 -11   2    0.00    0.71 
 -10 -11   2    0.42    0.40 
 -10 -11   2    0.23    0.47 
   9  11  -2    5.41    0.38 
   9  11  -2    5.42    0.48 
   9  11  -2    5.94    1.08 
  -9 -11   2    5.80    0.54 
  -9 -11   2    4.27    0.50 
  -9 -11   2    5.16    0.37 
  -9 -11   2    5.64    0.69 
  -9 -11   2    5.01    0.47 
   8  11  -2    3.54    0.35 
   8  11  -2    3.31    0.47 
  -8 -11   2    3.28    0.51 
  -8 -11   2    3.14    0.36 
  -8 -11   2    2.92    0.52 
  -8 -11   2    3.22    0.45 
  -8 -11   2    3.34    0.67 
   7  11  -2    6.31    0.26 
   7  11  -2    6.25    0.40 
  -7 -11   2    6.38    0.31 
  -7 -11   2    6.52    0.38 
  -7 -11   2    6.05    0.59 
  -7 -11   2    6.27    0.45 
  -7 -11   2    5.98    0.46 
   6  11  -2   26.87    0.48 
  -6 -11   2   27.04    0.50 
  -6 -11   2   26.83    0.66 
  -6 -11   2   28.47    0.58 
  -6 -11   2   26.89    0.63 
  -6 -11   2   27.14    0.42 
  -6 -11   2   27.37    0.55 
   5  11  -2   20.08    0.43 
  -5 -11   2   19.51    0.42 
  -5 -11   2   20.30    0.45 
  -5 -11   2   19.60    0.48 
  -5 -11   2   18.60    0.54 
  -5 -11   2   19.01    0.34 
  -5 -11   2   18.97    0.59 
   4  11  -2    9.67    0.33 
  -4 -11   2   10.49    0.54 
  -4 -11   2   10.97    0.36 
  -4 -11   2   10.63    0.37 
  -4 -11   2   11.33    0.54 
  -4 -11   2   10.94    0.29 
  -3 -11   2    9.27    0.49 
  -3 -11   2    9.68    0.24 
  -3 -11   2   10.43    0.32 
  -3 -11   2    9.96    0.31 
  -2 -11   2    0.23    0.19 
  -2 -11   2   -0.35    0.44 
  -2 -11   2    0.16    0.19 
  -1 -11   2   29.63    0.51 
   0 -11   2   32.68    0.52 
   5 -11   2   11.53    0.32 
   5 -11   2   11.22    0.45 
  -6  11  -2    2.17    0.27 
  -6  11  -2    2.84    0.23 
   6 -11   2    2.87    0.29 
   6 -11   2    2.16    0.45 
  -7  11  -2    7.44    0.34 
  -7  11  -2    7.86    0.34 
   7 -11   2    7.17    0.44 
   7 -11   2    7.17    0.52 
   7 -11   2    8.05    0.37 
  -8  11  -2   -0.18    0.34 
  -8  11  -2    0.13    0.44 
   8 -11   2   -0.15    0.36 
   8 -11   2   -0.23    0.55 
   8 -11   2   -0.15    0.47 
  -9  11  -2    6.02    0.54 
  -9  11  -2    4.15    0.38 
   9 -11   2    4.33    0.43 
   9 -11   2    4.75    0.53 
   9 -11   2    4.05    0.67 
 -10  11  -2    4.29    0.39 
 -10  11  -2    4.52    0.56 
  10 -11   2    5.16    0.73 
  10 -11   2    4.33    0.59 
  11 -11   2    0.65    0.68 
  12 -11   2    6.10    0.78 
  13 -11   2    2.93    0.81 
  14 -11   2    4.75    0.94 
  15 -11   2    4.50    0.93 
  16 -11   2    1.09    1.01 
  17  10  -2    3.57    1.72 
  16  10  -2    2.47    1.81 
  15  10  -2    2.29    0.63 
  15  10  -2    3.59    1.58 
  14  10  -2    0.61    0.56 
  14  10  -2    1.48    1.53 
 -14 -10   2    0.02    0.52 
  13  10  -2    4.22    1.38 
  13  10  -2    1.83    0.51 
 -13 -10   2    2.25    0.52 
  12  10  -2   16.84    1.30 
  12  10  -2   15.99    0.49 
 -12 -10   2   15.90    0.54 
 -12 -10   2   16.32    0.52 
  11  10  -2    0.39    0.51 
  11  10  -2    1.47    1.25 
  11  10  -2    0.36    0.44 
 -11 -10   2    0.07    0.48 
 -11 -10   2   -0.36    0.53 
 -11 -10   2    0.16    0.43 
  10  10  -2    5.28    0.45 
  10  10  -2    4.89    0.51 
  10  10  -2    5.24    1.16 
 -10 -10   2    5.00    0.55 
 -10 -10   2    5.19    0.49 
 -10 -10   2    5.37    0.69 
 -10 -10   2    5.06    0.41 
   9  10  -2   28.75    0.64 
   9  10  -2   28.85    0.61 
   9  10  -2   28.71    1.28 
  -9 -10   2   28.16    0.62 
  -9 -10   2   27.98    0.52 
  -9 -10   2   27.15    0.65 
  -9 -10   2   28.12    0.78 
   8  10  -2    9.93    0.46 
   8  10  -2    9.98    1.01 
   8  10  -2   10.52    0.37 
  -8 -10   2   10.43    0.44 
  -8 -10   2   10.97    0.62 
  -8 -10   2   10.28    0.50 
  -8 -10   2    9.68    0.49 
  -8 -10   2   10.48    0.36 
   7  10  -2   38.21    0.46 
   7  10  -2   38.03    0.54 
  -7 -10   2   36.90    0.56 
  -7 -10   2   37.75    0.55 
  -7 -10   2   37.45    0.42 
  -7 -10   2   37.24    0.50 
  -7 -10   2   37.63    0.67 
   6  10  -2    1.07    0.39 
   6  10  -2    0.82    0.25 
  -6 -10   2    1.42    0.39 
  -6 -10   2    0.75    0.35 
  -6 -10   2    0.80    0.42 
  -6 -10   2    0.40    0.44 
  -6 -10   2    0.96    0.50 
  -6 -10   2    0.64    0.28 
   5  10  -2   13.72    0.40 
  -5 -10   2   13.11    0.30 
  -5 -10   2   13.20    0.52 
  -5 -10   2   13.35    0.50 
  -5 -10   2   13.50    0.41 
  -5 -10   2   13.43    0.38 
  -5 -10   2   14.10    0.40 
   4  10  -2    1.23    0.31 
  -4 -10   2    0.90    0.23 
  -4 -10   2    1.47    0.30 
  -4 -10   2    1.88    0.32 
  -4 -10   2    1.00    0.45 
  -4 -10   2    0.92    0.41 
   3  10  -2   12.34    0.29 
  -3 -10   2   12.05    0.45 
  -3 -10   2   13.00    0.30 
  -3 -10   2   13.00    0.30 
  -3 -10   2   13.04    0.24 
  -2 -10   2   68.25    0.99 
  -2 -10   2   68.87    0.54 
  -2 -10   2   68.92    0.57 
  -2 -10   2   67.42    0.54 
  -2 -10   2   68.73    0.56 
  -1 -10   2    2.18    0.39 
   0 -10   2   19.58    0.52 
   4 -10   2    1.46    0.20 
  -5  10  -2    0.53    0.24 
   5 -10   2    0.51    0.25 
   5 -10   2    0.37    0.38 
  -6  10  -2    0.11    0.21 
  -6  10  -2   -0.64    0.27 
   6 -10   2   -0.79    0.27 
   6 -10   2    0.01    0.38 
  -7  10  -2    3.88    0.30 
  -7  10  -2    4.40    0.40 
   7 -10   2    3.14    0.47 
   7 -10   2    4.31    0.32 
   7 -10   2    3.67    0.42 
  -8  10  -2    0.38    0.33 
  -8  10  -2    0.67    0.46 
   8 -10   2   -0.03    0.46 
   8 -10   2   -0.79    0.52 
   8 -10   2    0.93    0.36 
  -9  10  -2    9.08    0.38 
  -9  10  -2    8.85    0.51 
   9 -10   2    8.83    0.54 
   9 -10   2    8.75    0.37 
   9 -10   2    8.10    0.62 
 -10  10  -2    1.69    0.53 
 -10  10  -2    1.48    0.40 
  10 -10   2    1.53    0.46 
  10 -10   2    1.31    0.62 
  10 -10   2    1.29    0.56 
 -11  10  -2    0.61    0.59 
  11 -10   2    0.40    0.69 
  11 -10   2    1.09    0.65 
  12 -10   2    4.53    0.76 
  13 -10   2    4.09    0.81 
  14 -10   2    0.54    0.82 
  15 -10   2    1.92    0.92 
  16 -10   2    1.45    0.99 
  17   9  -2    7.15    1.78 
  17   9  -2    5.26    0.73 
  16   9  -2   11.27    0.68 
  16   9  -2   11.25    1.60 
  15   9  -2    4.42    1.71 
  15   9  -2    2.56    0.61 
  14   9  -2    0.44    0.56 
  14   9  -2    2.29    1.48 
 -14  -9   2    0.56    0.50 
  13   9  -2    3.48    0.57 
  13   9  -2    4.18    1.39 
 -13  -9   2    3.12    0.53 
 -13  -9   2    2.60    0.51 
  12   9  -2    1.30    0.53 
  12   9  -2    0.29    0.58 
  12   9  -2    1.26    1.28 
 -12  -9   2    1.47    0.54 
 -12  -9   2   -0.03    0.58 
 -12  -9   2    1.02    0.48 
  11   9  -2    2.86    0.52 
  11   9  -2    3.82    1.25 
  11   9  -2    3.53    0.48 
 -11  -9   2    3.03    0.44 
 -11  -9   2    2.77    0.50 
 -11  -9   2    2.79    0.57 
  10   9  -2   35.69    0.74 
  10   9  -2   36.13    1.43 
  10   9  -2   34.46    0.76 
 -10  -9   2   36.39    0.77 
 -10  -9   2   35.81    0.90 
 -10  -9   2   37.49    1.22 
 -10  -9   2   34.00    0.72 
   9   9  -2    7.83    0.52 
   9   9  -2    7.91    1.12 
   9   9  -2    8.19    0.43 
  -9  -9   2    8.24    0.52 
  -9  -9   2    7.69    0.38 
  -9  -9   2    7.95    0.63 
  -9  -9   2    6.67    0.47 
   8   9  -2   17.51    0.73 
   8   9  -2   16.68    0.86 
   8   9  -2   17.06    1.32 
  -8  -9   2   15.49    0.79 
  -8  -9   2   15.90    0.85 
  -8  -9   2   16.14    0.88 
  -8  -9   2   17.78    1.11 
  -8  -9   2   17.90    0.73 
   7   9  -2   41.21    0.77 
   7   9  -2   41.46    0.63 
   7   9  -2   42.04    1.18 
  -7  -9   2   43.71    0.66 
  -7  -9   2   42.51    0.85 
  -7  -9   2   41.23    0.80 
  -7  -9   2   42.32    0.72 
  -7  -9   2   44.10    1.16 
   6   9  -2   70.47    0.98 
   6   9  -2   70.39    0.85 
  -6  -9   2   69.66    0.99 
  -6  -9   2   69.10    1.02 
  -6  -9   2   71.44    0.93 
  -6  -9   2   69.71    0.91 
  -6  -9   2   71.00    1.24 
  -6  -9   2   70.24    0.88 
   5   9  -2   62.06    0.90 
   5   9  -2   61.48    0.81 
   5   9  -2   61.13    0.77 
   5   9  -2   61.79    1.00 
  -5  -9   2   62.97    1.00 
  -5  -9   2   62.73    0.87 
  -5  -9   2   61.12    0.85 
  -5  -9   2   62.01    0.83 
  -5  -9   2   62.08    0.92 
  -5  -9   2   62.61    1.13 
   4   9  -2   27.74    0.46 
   4   9  -2   28.69    0.53 
  -4  -9   2   29.36    0.48 
  -4  -9   2   27.73    0.45 
  -4  -9   2   28.37    0.57 
   3   9  -2  127.82    1.34 
  -3  -9   2  129.80    1.33 
  -3  -9   2  128.77    1.33 
  -3  -9   2  128.83    1.31 
  -3  -9   2  128.58    1.55 
   2   9  -2    9.81    0.25 
  -2  -9   2    9.49    0.40 
  -2  -9   2   10.11    0.25 
  -2  -9   2   10.31    0.26 
  -2  -9   2    9.79    0.20 
  -1  -9   2  201.74    1.89 
  -1  -9   2  204.76    2.12 
  -4   9  -2   -0.28    0.19 
  -5   9  -2    1.03    0.23 
  -5   9  -2    1.74    0.10 
   5  -9   2    0.68    0.33 
   5  -9   2    1.65    0.31 
   5  -9   2    0.97    0.22 
  -6   9  -2    1.70    0.30 
  -6   9  -2    0.82    0.35 
   6  -9   2    0.38    0.37 
   6  -9   2    1.94    0.30 
   6  -9   2    0.95    0.41 
  -7   9  -2   90.52    0.86 
  -7   9  -2   90.78    0.93 
   7  -9   2   91.26    0.99 
   7  -9   2   90.57    0.96 
   7  -9   2   91.45    0.87 
  -8   9  -2    2.16    0.34 
  -8   9  -2    1.47    0.45 
   8  -9   2    2.40    0.33 
   8  -9   2    1.65    0.50 
   8  -9   2    1.59    0.46 
  -9   9  -2   35.65    0.50 
  -9   9  -2   36.19    0.62 
   9  -9   2   35.49    0.64 
   9  -9   2   35.54    0.49 
   9  -9   2   35.26    0.67 
 -10   9  -2   10.40    0.41 
 -10   9  -2   10.31    0.58 
  10  -9   2    9.69    0.64 
  10  -9   2   10.71    0.43 
  10  -9   2    9.68    0.58 
 -11   9  -2   10.67    0.48 
 -11   9  -2   12.92    0.71 
  11  -9   2   11.86    0.68 
  11  -9   2   11.08    0.76 
 -12   9  -2    1.53    0.68 
  12  -9   2    1.03    0.71 
  12  -9   2    1.04    0.70 
 -13   9  -2    5.76    0.79 
  13  -9   2    5.91    0.87 
  14  -9   2    1.62    0.83 
  15  -9   2    0.67    0.85 
  16  -9   2    1.51    0.90 
  17  -9   2    3.28    0.93 
  18   8  -2    3.64    1.80 
  18   8  -2    4.75    0.77 
  17   8  -2    6.02    1.84 
  17   8  -2    7.12    0.72 
  16   8  -2    2.96    0.67 
  16   8  -2    1.77    1.75 
  15   8  -2    4.73    0.62 
  15   8  -2    4.33    1.58 
  14   8  -2   13.14    1.51 
  14   8  -2   13.66    0.64 
 -14  -8   2   13.27    0.55 
 -14  -8   2   12.67    0.55 
  13   8  -2    2.19    1.40 
  13   8  -2    2.18    0.55 
 -13  -8   2    1.76    0.47 
 -13  -8   2    1.78    0.44 
  12   8  -2   18.68    0.59 
  12   8  -2   19.22    1.44 
  12   8  -2   17.30    0.61 
 -12  -8   2   17.51    0.62 
 -12  -8   2   17.91    0.52 
 -12  -8   2   18.10    0.56 
  11   8  -2    4.10    0.57 
  11   8  -2    4.61    1.28 
  11   8  -2    3.71    0.48 
 -11  -8   2    3.76    0.49 
 -11  -8   2    4.34    0.55 
 -11  -8   2    4.00    0.44 
  10   8  -2   30.33    0.64 
  10   8  -2   33.58    1.37 
  10   8  -2   33.11    0.68 
 -10  -8   2   30.71    0.64 
 -10  -8   2   31.20    0.63 
 -10  -8   2   33.41    0.66 
   9   8  -2   42.87    1.40 
   9   8  -2   41.82    0.73 
   9   8  -2   41.41    0.88 
  -9  -8   2   44.77    1.23 
  -9  -8   2   39.79    0.71 
  -9  -8   2   42.37    0.74 
  -9  -8   2   42.47    0.86 
   8   8  -2    2.04    0.38 
   8   8  -2    1.19    0.47 
   8   8  -2    1.48    1.01 
  -8  -8   2    1.86    0.35 
  -8  -8   2    2.24    0.57 
  -8  -8   2    2.06    0.47 
  -8  -8   2    2.10    0.42 
   7   8  -2   61.51    1.34 
   7   8  -2   61.52    0.89 
   7   8  -2   61.05    1.02 
  -7  -8   2   61.28    0.95 
  -7  -8   2   61.92    0.92 
  -7  -8   2   58.94    1.00 
  -7  -8   2   62.83    1.28 
  -7  -8   2   60.60    1.01 
   6   8  -2   68.91    0.92 
   6   8  -2   70.82    0.72 
   6   8  -2   72.09    0.86 
   6   8  -2   70.20    1.11 
  -6  -8   2   70.94    0.78 
  -6  -8   2   69.24    0.74 
  -6  -8   2   70.19    1.05 
  -6  -8   2   68.62    0.76 
  -6  -8   2   72.23    0.86 
   5   8  -2  132.81    2.26 
   5   8  -2  135.88    2.33 
   5   8  -2  131.99    2.40 
  -5  -8   2  131.11    2.28 
  -5  -8   2  132.94    2.46 
  -5  -8   2  133.84    2.33 
  -5  -8   2  131.63    2.30 
  -5  -8   2  127.16    2.35 
  -5  -8   2  135.37    2.31 
   4   8  -2    0.43    0.18 
   4   8  -2    0.71    0.16 
   4   8  -2    0.11    0.27 
   4   8  -2    1.31    0.31 
  -4  -8   2    1.07    0.33 
  -4  -8   2    0.34    0.36 
  -4  -8   2    0.14    0.33 
  -4  -8   2    0.45    0.21 
  -4  -8   2    0.38    0.27 
  -4  -8   2    0.63    0.29 
   3   8  -2   28.09    0.57 
   3   8  -2   29.05    0.69 
  -3  -8   2   28.58    0.52 
  -3  -8   2   29.93    0.85 
  -3  -8   2   28.59    0.49 
  -3  -8   2   28.75    0.53 
  -2  -8   2    1.94    0.25 
  -2  -8   2    1.80    0.26 
  -2  -8   2    1.05    0.36 
  -1  -8   2   46.17    0.52 
  -1  -8   2   46.90    0.83 
   2  -8   2   63.15    0.54 
  -3   8  -2    1.82    0.19 
   3  -8   2    1.60    0.19 
   3  -8   2    2.62    0.26 
  -4   8  -2   37.98    0.38 
   4  -8   2   37.75    0.38 
   4  -8   2   37.24    0.38 
   4  -8   2   37.11    0.39 
  -5   8  -2   18.02    0.23 
  -5   8  -2   18.31    0.30 
   5  -8   2   18.17    0.33 
   5  -8   2   17.79    0.22 
   5  -8   2   18.47    0.32 
  -6   8  -2    2.15    0.34 
  -6   8  -2    1.61    0.25 
   6  -8   2    0.90    0.36 
   6  -8   2    2.39    0.36 
   6  -8   2    1.83    0.25 
  -7   8  -2   37.13    0.59 
  -7   8  -2   35.80    0.68 
   7  -8   2   35.73    0.73 
   7  -8   2   37.99    0.62 
   7  -8   2   35.82    0.70 
  -8   8  -2    6.92    0.48 
  -8   8  -2    5.96    0.35 
   8  -8   2    6.31    0.51 
   8  -8   2    6.03    0.35 
   8  -8   2    5.87    0.52 
  -9   8  -2    9.75    0.41 
  -9   8  -2    9.59    0.56 
   9  -8   2    8.93    0.59 
   9  -8   2    9.24    0.64 
   9  -8   2   10.15    0.44 
 -10   8  -2    7.23    0.38 
 -10   8  -2    7.59    0.50 
  10  -8   2    7.24    0.54 
  10  -8   2    7.71    0.39 
  10  -8   2    6.87    0.57 
 -11   8  -2    1.66    0.59 
 -11   8  -2    0.57    0.37 
  11  -8   2    1.41    0.43 
  11  -8   2    0.84    0.62 
  11  -8   2    0.66    0.66 
 -12   8  -2    0.71    0.62 
  12  -8   2    0.59    0.69 
  12  -8   2    0.80    0.68 
 -13   8  -2    4.26    0.65 
  13  -8   2    3.74    0.69 
  13  -8   2    4.99    0.69 
 -14   8  -2    1.51    0.76 
  14  -8   2    0.61    0.80 
  15  -8   2    1.86    0.78 
  16  -8   2   -0.23    0.85 
  17  -8   2    0.33    0.93 
  18   7  -2    3.28    1.98 
  18   7  -2    3.55    0.82 
  17   7  -2   11.72    1.97 
  17   7  -2   10.56    0.74 
  16   7  -2    1.69    1.70 
  16   7  -2    1.10    0.67 
  15   7  -2   12.81    1.63 
  15   7  -2   11.84    0.67 
 -15  -7   2   11.27    0.56 
  14   7  -2    1.07    0.59 
  14   7  -2    1.68    1.55 
 -14  -7   2    1.37    0.48 
 -14  -7   2    1.28    0.48 
  13   7  -2    0.09    1.40 
  13   7  -2    0.79    0.58 
  13   7  -2    0.30    0.64 
 -13  -7   2    0.90    0.48 
 -13  -7   2    0.23    0.48 
 -13  -7   2    0.30    0.58 
  12   7  -2    1.63    0.60 
  12   7  -2    1.83    0.54 
  12   7  -2    0.97    1.35 
 -12  -7   2    1.57    0.48 
 -12  -7   2    1.09    0.42 
 -12  -7   2    2.48    0.59 
  11   7  -2    0.20    1.26 
  11   7  -2   -0.30    0.53 
  11   7  -2    0.59    0.50 
 -11  -7   2    0.25    0.52 
 -11  -7   2    0.35    0.47 
 -11  -7   2    0.86    0.40 
  10   7  -2    5.08    0.50 
  10   7  -2    5.27    1.18 
  10   7  -2    6.20    0.46 
 -10  -7   2    5.70    0.51 
 -10  -7   2    4.94    0.36 
 -10  -7   2    4.99    0.43 
 -10  -7   2    5.23    0.34 
   9   7  -2    7.61    0.51 
   9   7  -2    7.97    1.14 
   9   7  -2    7.90    0.44 
  -9  -7   2    6.30    0.39 
  -9  -7   2    8.11    0.37 
  -9  -7   2    6.45    0.42 
  -9  -7   2    7.26    0.48 
   8   7  -2    8.71    1.14 
   8   7  -2    7.35    0.50 
   8   7  -2    7.28    0.58 
  -8  -7   2    7.15    0.52 
  -8  -7   2    7.08    0.61 
  -8  -7   2    7.44    0.55 
  -8  -7   2    7.57    0.44 
   7   7  -2   16.90    0.95 
   7   7  -2   15.38    0.40 
   7   7  -2   15.99    0.47 
   7   7  -2   15.85    0.40 
  -7  -7   2   16.45    0.44 
  -7  -7   2   16.42    0.47 
  -7  -7   2   15.70    0.35 
  -7  -7   2   15.98    0.43 
  -7  -7   2   16.57    0.53 
   6   7  -2  124.15    1.78 
   6   7  -2  123.02    1.48 
   6   7  -2  123.28    1.62 
   6   7  -2  125.18    1.56 
  -6  -7   2  122.33    1.68 
  -6  -7   2  123.41    1.55 
  -6  -7   2  122.86    1.55 
  -6  -7   2  123.16    1.48 
  -6  -7   2  120.82    1.50 
  -6  -7   2  123.91    1.52 
   5   7  -2    0.26    0.33 
   5   7  -2    0.69    0.25 
   5   7  -2    0.51    0.68 
   5   7  -2    0.97    0.30 
  -5  -7   2    0.75    0.30 
  -5  -7   2    0.94    0.36 
  -5  -7   2    0.77    0.32 
  -5  -7   2    1.03    0.24 
  -5  -7   2    0.47    0.34 
  -5  -7   2    1.10    0.33 
   4   7  -2    3.97    0.29 
   4   7  -2    3.87    0.37 
   4   7  -2    4.22    0.39 
   4   7  -2    4.19    0.30 
  -4  -7   2    4.48    0.36 
  -4  -7   2    4.77    0.55 
  -4  -7   2    4.02    0.36 
  -4  -7   2    4.29    0.44 
  -4  -7   2    4.28    0.31 
  -4  -7   2    3.57    0.39 
   3   7  -2    0.00    0.23 
   3   7  -2    0.41    0.25 
  -3  -7   2    0.20    0.31 
  -3  -7   2   -0.20    0.17 
  -3  -7   2    0.48    0.27 
  -3  -7   2   -0.18    0.23 
  -3  -7   2   -0.03    0.22 
   2   7  -2    5.29    0.21 
  -2  -7   2    5.36    0.29 
  -2  -7   2    5.22    0.20 
  -2  -7   2    4.95    0.20 
  -1  -7   2    5.13    0.30 
  -1  -7   2    5.40    0.14 
   0  -7   2   22.93    0.15 
  -2   7  -2   14.88    0.22 
   2  -7   2   14.20    0.17 
  -3   7  -2  160.54    1.74 
   3  -7   2  158.69    1.74 
   3  -7   2  160.82    1.75 
  -4   7  -2   48.90    0.55 
   4  -7   2   46.32    0.63 
   4  -7   2   48.11    0.55 
   4  -7   2   47.51    0.59 
  -5   7  -2   10.03    0.35 
  -5   7  -2    9.05    0.28 
   5  -7   2    9.78    0.37 
   5  -7   2    9.29    0.37 
   5  -7   2    8.83    0.27 
  -6   7  -2    6.17    0.27 
  -6   7  -2    5.10    0.34 
  -6   7  -2    5.24    0.18 
   6  -7   2    4.76    0.36 
   6  -7   2    5.85    0.26 
   6  -7   2    4.22    0.33 
  -7   7  -2    0.65    0.37 
  -7   7  -2    0.48    0.25 
   7  -7   2    0.01    0.39 
   7  -7   2   -0.69    0.38 
   7  -7   2    0.27    0.26 
  -8   7  -2    1.70    0.45 
  -8   7  -2    2.53    0.33 
   8  -7   2    0.59    0.46 
   8  -7   2    2.45    0.34 
   8  -7   2    0.96    0.45 
  -9   7  -2    0.68    0.33 
  -9   7  -2    0.41    0.49 
   9  -7   2    0.31    0.32 
   9  -7   2   -0.34    0.48 
   9  -7   2   -0.38    0.50 
 -10   7  -2    6.94    0.52 
 -10   7  -2    7.23    0.32 
  10  -7   2    5.89    0.56 
  10  -7   2    7.05    0.36 
  10  -7   2    5.98    0.58 
 -11   7  -2    0.90    0.57 
  11  -7   2    0.47    0.39 
  11  -7   2    0.16    0.62 
  11  -7   2   -0.57    0.62 
 -12   7  -2    1.02    0.65 
 -12   7  -2   -0.32    0.23 
  12  -7   2    0.42    0.68 
  12  -7   2    0.41    0.68 
 -13   7  -2    1.21    0.68 
  13  -7   2    1.10    0.69 
  13  -7   2    0.85    0.67 
 -14   7  -2    3.02    0.69 
  14  -7   2    2.12    0.76 
  14  -7   2    2.15    0.76 
 -15   7  -2    1.80    0.74 
  15  -7   2    1.64    0.80 
  16  -7   2    2.73    0.83 
  17  -7   2    0.06    0.86 
  18   6  -2   10.93    2.10 
  18   6  -2   11.72    0.84 
  17   6  -2    6.59    0.76 
  17   6  -2    6.99    1.80 
  16   6  -2    4.21    1.70 
  16   6  -2    6.80    0.74 
 -16  -6   2    6.03    0.60 
  15   6  -2    2.96    1.58 
  15   6  -2    3.52    0.68 
 -15  -6   2    2.24    0.50 
  14   6  -2    0.82    1.56 
  14   6  -2    0.56    0.62 
 -14  -6   2    0.03    0.46 
  13   6  -2    5.84    1.48 
  13   6  -2    6.33    0.59 
  13   6  -2    6.29    0.64 
 -13  -6   2    6.11    0.48 
 -13  -6   2    5.65    0.58 
 -13  -6   2    5.74    0.45 
  12   6  -2    0.83    0.59 
  12   6  -2    0.79    0.54 
  12   6  -2    0.83    1.36 
 -12  -6   2    0.93    0.46 
 -12  -6   2    1.18    0.56 
 -12  -6   2    0.75    0.43 
  11   6  -2    4.82    0.49 
  11   6  -2    4.15    0.53 
  11   6  -2    4.45    1.25 
 -11  -6   2    4.65    0.40 
 -11  -6   2    5.18    0.45 
 -11  -6   2    5.04    0.54 
  10   6  -2    8.07    0.52 
  10   6  -2    8.10    0.47 
  10   6  -2    7.18    1.18 
 -10  -6   2    8.38    0.54 
 -10  -6   2    8.56    0.38 
 -10  -6   2    8.72    0.44 
   9   6  -2  165.97    1.56 
   9   6  -2  165.36    1.46 
   9   6  -2  164.48    1.87 
  -9  -6   2  165.09    1.46 
  -9  -6   2  164.78    1.37 
  -9  -6   2  164.50    1.52 
  -9  -6   2  166.29    1.44 
   8   6  -2   36.71    0.66 
   8   6  -2   35.69    0.57 
   8   6  -2   37.20    0.54 
   8   6  -2   38.50    1.14 
  -8  -6   2   36.81    0.58 
  -8  -6   2   37.81    0.55 
  -8  -6   2   39.78    0.97 
  -8  -6   2   37.73    0.51 
  -8  -6   2   38.15    0.49 
   7   6  -2   45.51    0.72 
   7   6  -2   47.42    0.92 
   7   6  -2   44.05    0.83 
   7   6  -2   45.41    1.12 
  -7  -6   2   46.55    0.71 
  -7  -6   2   46.96    0.98 
  -7  -6   2   44.46    0.82 
  -7  -6   2   44.98    0.74 
  -7  -6   2   46.54    0.71 
   6   6  -2    0.43    0.29 
   6   6  -2    0.28    0.29 
   6   6  -2    1.10    0.75 
   6   6  -2    0.54    0.36 
  -6  -6   2    0.77    0.33 
  -6  -6   2    0.69    0.36 
  -6  -6   2    0.96    0.30 
  -6  -6   2    0.42    0.25 
  -6  -6   2    1.29    0.30 
  -6  -6   2    0.56    0.37 
  -6  -6   2    0.43    0.30 
   5   6  -2    3.62    0.66 
   5   6  -2    3.27    0.32 
   5   6  -2    3.70    0.27 
   5   6  -2    3.36    0.25 
  -5  -6   2    3.44    0.22 
  -5  -6   2    3.42    0.29 
  -5  -6   2    3.88    0.31 
  -5  -6   2    3.19    0.26 
  -5  -6   2    3.72    0.29 
  -5  -6   2    3.28    0.31 
   4   6  -2   33.11    0.91 
   4   6  -2   34.31    0.63 
   4   6  -2   33.82    0.63 
   4   6  -2   35.76    0.79 
   4   6  -2   32.91    0.72 
  -4  -6   2   34.44    0.69 
  -4  -6   2   35.29    0.87 
  -4  -6   2   34.19    0.67 
  -4  -6   2   35.11    0.74 
  -4  -6   2   34.43    0.66 
  -4  -6   2   32.92    0.73 
  -4  -6   2   34.06    0.67 
   3   6  -2    6.45    0.28 
   3   6  -2    6.41    0.20 
   3   6  -2    6.25    0.20 
   3   6  -2    5.91    0.27 
  -3  -6   2    6.14    0.29 
  -3  -6   2    6.43    0.25 
  -3  -6   2    6.24    0.33 
  -3  -6   2    6.14    0.26 
  -3  -6   2    5.95    0.20 
  -3  -6   2    6.63    0.68 
  -3  -6   2    6.03    0.31 
   2   6  -2    0.67    0.22 
  -2  -6   2    1.52    0.32 
  -2  -6   2    1.52    0.32 
  -2  -6   2    0.60    0.64 
  -2  -6   2    1.47    0.23 
  -2  -6   2    1.21    0.22 
   1   6  -2   39.23    0.48 
  -1  -6   2   37.96    0.54 
  -1  -6   2   38.66    0.45 
  -1  -6   2   38.52    0.71 
  -1  -6   2   38.44    0.44 
   0  -6   2   12.08    0.36 
   0  -6   2   12.98    0.21 
  -1   6  -2    5.02    0.29 
   1  -6   2    4.48    0.30 
   1  -6   2    3.38    0.42 
  -2   6  -2  113.37    0.84 
   2  -6   2  112.27    0.84 
   2  -6   2  112.86    1.01 
  -3   6  -2  110.64    0.75 
   3  -6   2  109.30    0.75 
  -4   6  -2   57.49    0.87 
  -4   6  -2   56.95    0.90 
   4  -6   2   57.58    0.87 
   4  -6   2   57.93    0.92 
   4  -6   2   58.43    0.90 
  -5   6  -2   17.98    0.16 
  -5   6  -2   17.65    0.20 
  -5   6  -2   18.44    0.29 
   5  -6   2   17.21    0.30 
   5  -6   2   17.73    0.20 
   5  -6   2   18.27    0.30 
  -6   6  -2    3.85    0.21 
  -6   6  -2    4.10    0.31 
   6  -6   2    4.04    0.22 
   6  -6   2    3.49    0.33 
   6  -6   2    3.92    0.32 
  -7   6  -2    3.06    0.24 
  -7   6  -2    3.20    0.35 
   7  -6   2    3.45    0.25 
   7  -6   2    2.96    0.37 
   7  -6   2    2.66    0.37 
  -8   6  -2   20.64    0.43 
  -8   6  -2   21.30    0.30 
   8  -6   2   19.44    0.43 
   8  -6   2   20.64    0.32 
   8  -6   2   19.74    0.46 
  -9   6  -2    5.43    0.10 
  -9   6  -2    6.29    0.48 
   9  -6   2    5.62    0.32 
   9  -6   2    5.33    0.53 
   9  -6   2    4.69    0.49 
 -10   6  -2    4.87    0.53 
  10  -6   2    4.02    0.35 
  10  -6   2    3.26    0.54 
  10  -6   2    3.92    0.57 
 -11   6  -2   12.71    0.62 
 -11   6  -2   11.74    0.41 
  11  -6   2   12.43    0.42 
  11  -6   2   12.19    0.65 
  11  -6   2   11.88    0.68 
 -12   6  -2    1.01    0.45 
 -12   6  -2    1.65    0.66 
  12  -6   2    0.57    0.66 
  12  -6   2    1.94    0.46 
  12  -6   2    1.29    0.68 
 -13   6  -2    1.14    0.66 
  13  -6   2    0.63    0.73 
  13  -6   2    0.47    0.64 
 -14   6  -2    1.27    0.71 
  14  -6   2    0.83    0.74 
  14  -6   2    0.61    0.73 
 -15   6  -2    0.76    0.75 
  15  -6   2    0.57    0.78 
  15  -6   2    0.46    0.76 
  16  -6   2    2.03    0.80 
  17  -6   2    1.00    0.85 
  18  -6   2    1.94    1.05 
  18   5  -2    1.10    1.89 
  18   5  -2    3.39    0.81 
  17   5  -2   13.84    1.81 
  17   5  -2   15.06    0.80 
  16   5  -2    5.16    0.71 
  16   5  -2    2.22    1.73 
 -16  -5   2    4.48    0.56 
  15   5  -2    3.93    0.66 
  15   5  -2    2.77    1.71 
 -15  -5   2    3.57    0.51 
  14   5  -2    0.97    0.63 
  14   5  -2   -0.29    1.50 
 -14  -5   2    1.06    0.62 
 -14  -5   2    0.50    0.47 
  13   5  -2    4.73    0.63 
  13   5  -2    5.05    0.59 
  13   5  -2    3.73    1.45 
 -13  -5   2    4.66    0.47 
 -13  -5   2    5.66    0.61 
 -13  -5   2    5.31    0.45 
  12   5  -2    1.35    0.52 
  12   5  -2    1.54    1.40 
  12   5  -2    1.40    0.60 
 -12  -5   2    1.65    0.57 
 -12  -5   2    1.48    0.41 
 -12  -5   2    1.59    0.44 
  11   5  -2   32.01    1.42 
  11   5  -2   31.38    0.60 
  11   5  -2   31.37    0.66 
 -11  -5   2   30.62    0.61 
 -11  -5   2   32.10    0.51 
 -11  -5   2   31.89    0.57 
  10   5  -2   17.35    0.44 
  10   5  -2   17.78    0.52 
  10   5  -2   16.80    1.18 
 -10  -5   2   17.81    0.50 
 -10  -5   2   17.84    0.34 
 -10  -5   2   18.23    0.41 
   9   5  -2    0.27    0.42 
   9   5  -2   -0.10    1.04 
   9   5  -2    0.24    0.48 
  -9  -5   2    0.23    0.26 
  -9  -5   2   -0.07    0.31 
  -9  -5   2    0.21    0.45 
  -9  -5   2    0.42    0.37 
   8   5  -2   12.02    0.43 
   8   5  -2   12.69    0.46 
   8   5  -2   12.18    0.50 
   8   5  -2   13.84    1.01 
  -8  -5   2   13.09    0.39 
  -8  -5   2   13.02    0.38 
  -8  -5   2   12.71    0.50 
  -8  -5   2   13.08    0.45 
   7   5  -2   -0.68    0.31 
   7   5  -2    0.25    0.81 
   7   5  -2   -0.36    0.38 
   7   5  -2   -0.17    0.30 
  -7  -5   2    0.06    0.26 
  -7  -5   2   -0.29    0.25 
  -7  -5   2    0.43    0.39 
  -7  -5   2   -0.67    0.30 
  -7  -5   2    0.07    0.37 
   6   5  -2   33.43    0.56 
   6   5  -2   33.10    0.55 
   6   5  -2   33.71    0.90 
   6   5  -2   34.49    0.67 
  -6  -5   2   33.20    0.54 
  -6  -5   2   34.49    0.49 
  -6  -5   2   33.48    0.59 
  -6  -5   2   35.63    0.76 
  -6  -5   2   34.00    0.53 
  -6  -5   2   33.64    0.54 
   5   5  -2   26.15    0.35 
   5   5  -2   27.49    0.73 
   5   5  -2   26.45    0.33 
   5   5  -2   26.25    0.39 
  -5  -5   2   26.34    0.38 
  -5  -5   2   26.40    0.33 
  -5  -5   2   26.39    0.33 
  -5  -5   2   26.69    0.35 
  -5  -5   2   26.14    0.29 
  -5  -5   2   26.48    0.38 
  -5  -5   2   27.06    0.36 
   4   5  -2    0.21    0.27 
   4   5  -2    0.22    0.19 
   4   5  -2   -0.28    0.58 
   4   5  -2    0.27    0.23 
   4   5  -2   -0.26    0.22 
  -4  -5   2    0.19    0.25 
  -4  -5   2    0.74    0.65 
  -4  -5   2    0.21    0.19 
  -4  -5   2    0.56    0.29 
  -4  -5   2    0.03    0.25 
  -4  -5   2    0.25    0.24 
  -4  -5   2   -0.37    0.24 
  -4  -5   2    0.26    0.28 
   3   5  -2    0.01    0.23 
   3   5  -2    0.23    0.26 
   3   5  -2   -0.10    0.19 
   3   5  -2    0.27    0.17 
  -3  -5   2    0.01    0.26 
  -3  -5   2   -0.20    0.62 
  -3  -5   2    0.43    0.27 
  -3  -5   2    0.30    0.23 
  -3  -5   2    0.41    0.22 
  -3  -5   2    0.54    0.29 
  -3  -5   2    0.19    0.17 
   2   5  -2   23.65    0.45 
   2   5  -2   22.85    0.62 
  -2  -5   2   23.29    0.54 
  -2  -5   2   23.20    0.66 
  -2  -5   2   23.53    0.49 
  -2  -5   2   23.13    0.82 
  -2  -5   2   24.03    0.49 
   1   5  -2  164.14    1.78 
  -1  -5   2  161.07    1.88 
  -1  -5   2  163.21    1.77 
  -1  -5   2  163.89    1.77 
  -1  -5   2  160.81    1.81 
   0  -5   2    3.76    0.25 
   0  -5   2    2.79    0.34 
  -1   5  -2   31.90    0.74 
   1  -5   2   31.03    0.74 
   1  -5   2   30.03    0.81 
  -2   5  -2    0.41    0.13 
   2  -5   2    0.24    0.17 
   2  -5   2    0.20    0.13 
   2  -5   2    0.84    0.22 
   2  -5   2   -0.06    0.28 
   3  -5   2   14.05    0.44 
   3  -5   2   14.95    0.39 
  -4   5  -2  119.35    1.88 
  -4   5  -2  122.38    1.92 
  -4   5  -2  114.31    1.89 
   4  -5   2  120.96    1.92 
   4  -5   2  117.76    1.93 
  -5   5  -2    7.07    0.39 
  -5   5  -2    5.38    0.39 
  -5   5  -2    6.23    0.35 
   5  -5   2    6.57    0.46 
   5  -5   2    6.14    0.42 
   5  -5   2    7.24    0.41 
   5  -5   2    5.44    0.40 
  -6   5  -2    1.72    0.31 
  -6   5  -2    1.54    0.21 
   6  -5   2    1.69    0.28 
   6  -5   2    0.96    0.33 
   6  -5   2    0.93    0.32 
   6  -5   2    1.18    0.22 
  -7   5  -2    3.94    0.37 
  -7   5  -2    3.92    0.15 
   7  -5   2    4.34    0.28 
   7  -5   2    3.28    0.40 
   7  -5   2    4.50    0.33 
   7  -5   2    3.52    0.38 
  -8   5  -2    0.03    0.38 
   8  -5   2    0.62    0.27 
   8  -5   2    0.08    0.41 
   8  -5   2    0.86    0.31 
   8  -5   2   -0.12    0.44 
  -9   5  -2    0.02    0.45 
  -9   5  -2   -0.13    0.28 
   9  -5   2   -0.72    0.45 
   9  -5   2    0.47    0.32 
   9  -5   2    0.83    0.32 
   9  -5   2   -0.86    0.47 
 -10   5  -2   -0.19    0.50 
 -10   5  -2   -0.45    0.31 
  10  -5   2    0.23    0.31 
  10  -5   2   -0.62    0.53 
  10  -5   2   -0.89    0.50 
  10  -5   2   -0.51    0.33 
 -11   5  -2    1.49    0.36 
 -11   5  -2    2.19    0.56 
  11  -5   2    0.91    0.55 
  11  -5   2    0.96    0.58 
  11  -5   2    2.10    0.32 
  11  -5   2    1.62    0.37 
 -12   5  -2    3.36    0.61 
 -12   5  -2    2.36    0.38 
  12  -5   2    1.52    0.60 
  12  -5   2    1.92    0.47 
  12  -5   2    1.88    0.73 
  12  -5   2    2.15    0.43 
 -13   5  -2    1.60    0.69 
 -13   5  -2    0.29    0.44 
  13  -5   2    0.76    0.62 
  13  -5   2    0.04    0.71 
  13  -5   2    0.30    0.65 
 -14   5  -2    4.41    0.72 
  14  -5   2    2.62    0.73 
  14  -5   2    2.99    0.72 
 -15   5  -2    0.70    0.74 
  15  -5   2    0.89    0.74 
  15  -5   2    0.23    0.80 
 -16   5  -2    6.61    0.86 
  16  -5   2    6.27    0.84 
  16  -5   2    6.83    0.88 
  17  -5   2    2.70    0.87 
  18  -5   2    4.39    0.89 
  19   4  -2    2.21    0.86 
  18   4  -2    2.01    0.80 
  17   4  -2    1.14    0.76 
  16   4  -2   13.35    0.77 
  16   4  -2    9.30    1.64 
 -16  -4   2   12.09    0.54 
  15   4  -2   10.54    0.70 
 -15  -4   2   11.10    0.55 
  14   4  -2   13.11    0.69 
  14   4  -2   12.66    0.66 
 -14  -4   2   12.61    0.49 
 -14  -4   2   12.73    0.62 
  13   4  -2   14.39    0.56 
  13   4  -2   15.61    0.69 
 -13  -4   2   15.74    0.62 
 -13  -4   2   15.17    0.44 
  12   4  -2    1.27    0.53 
  12   4  -2    1.06    0.61 
 -12  -4   2    1.48    0.57 
 -12  -4   2    0.95    0.40 
 -12  -4   2    1.09    0.43 
  11   4  -2   27.10    0.65 
  11   4  -2   26.18    0.58 
 -11  -4   2   26.51    0.59 
 -11  -4   2   26.86    0.46 
 -11  -4   2   25.65    0.49 
  10   4  -2   10.45    0.56 
  10   4  -2    9.55    0.26 
  10   4  -2    9.76    0.48 
  10   4  -2    8.23    1.16 
 -10  -4   2   10.09    0.54 
 -10  -4   2   10.30    0.43 
 -10  -4   2    9.75    0.37 
   9   4  -2   -0.34    0.39 
   9   4  -2   -0.12    0.50 
   9   4  -2   -0.39    0.45 
   9   4  -2    0.29    0.22 
   9   4  -2   -0.24    0.99 
  -9  -4   2    0.09    0.35 
  -9  -4   2    0.23    0.45 
  -9  -4   2    0.05    0.30 
   8   4  -2   12.63    0.43 
   8   4  -2   13.06    0.37 
   8   4  -2   13.00    0.34 
   8   4  -2   13.01    0.89 
  -8  -4   2   13.33    0.22 
  -8  -4   2   12.85    0.33 
  -8  -4   2   13.12    0.29 
  -8  -4   2   12.93    0.41 
   7   4  -2   28.47    0.90 
   7   4  -2   27.46    0.48 
   7   4  -2   27.73    0.43 
   7   4  -2   27.18    0.40 
  -7  -4   2   27.81    0.34 
  -7  -4   2   28.08    0.37 
  -7  -4   2   27.86    0.47 
  -7  -4   2   27.64    0.41 
   6   4  -2    0.66    0.68 
   6   4  -2    0.61    0.27 
   6   4  -2   -0.07    0.28 
   6   4  -2   -0.01    0.34 
  -6  -4   2    0.99    0.33 
  -6  -4   2    0.32    0.36 
  -6  -4   2    0.57    0.27 
  -6  -4   2    0.32    0.22 
  -6  -4   2    0.56    0.33 
  -6  -4   2    0.55    0.22 
   5   4  -2   18.98    0.86 
   5   4  -2   17.65    0.58 
   5   4  -2   19.28    0.71 
   5   4  -2   18.80    0.68 
  -5  -4   2   17.96    0.66 
  -5  -4   2   18.39    0.60 
  -5  -4   2   18.09    0.57 
  -5  -4   2   18.39    0.54 
  -5  -4   2   18.12    0.57 
  -5  -4   2   18.77    0.57 
  -5  -4   2   19.71    0.77 
   4   4  -2    2.79    0.58 
   4   4  -2    3.66    0.22 
   4   4  -2    3.59    0.28 
   4   4  -2    3.88    0.24 
   4   4  -2    3.25    0.23 
  -4  -4   2    3.58    0.28 
  -4  -4   2    3.30    0.18 
  -4  -4   2    3.80    0.29 
  -4  -4   2    5.17    0.64 
  -4  -4   2    3.38    0.23 
  -4  -4   2    3.27    0.25 
  -4  -4   2    3.15    0.21 
  -4  -4   2    3.14    0.23 
   3   4  -2  154.56    2.86 
   3   4  -2  160.53    2.84 
   3   4  -2  157.58    2.94 
   3   4  -2  163.12    2.90 
   3   4  -2  160.74    2.83 
  -3  -4   2  160.98    2.85 
  -3  -4   2  158.36    2.95 
  -3  -4   2  154.61    2.86 
  -3  -4   2  161.24    2.84 
  -3  -4   2  160.07    2.84 
  -3  -4   2  161.81    2.90 
   2   4  -2    0.17    0.17 
   2   4  -2    0.52    0.22 
   2   4  -2    0.63    0.17 
   2   4  -2    0.52    0.21 
  -2  -4   2    0.49    0.23 
  -2  -4   2    0.32    0.20 
  -2  -4   2    0.50    0.19 
  -2  -4   2    0.58    0.24 
  -2  -4   2    1.01    0.25 
  -2  -4   2    0.18    0.51 
   1   4  -2    6.23    0.18 
  -1  -4   2    5.68    0.16 
  -1  -4   2    5.54    0.24 
  -1  -4   2    5.59    0.23 
  -1  -4   2    5.67    0.17 
   0  -4   2  203.31    2.45 
   0  -4   2  195.80    2.45 
   0  -4   2  199.28    2.48 
  -1   4  -2   19.32    0.55 
   1  -4   2   19.29    0.55 
   1  -4   2   19.82    0.55 
   1  -4   2   20.29    0.62 
  -2   4  -2   -0.01    0.12 
  -2   4  -2    0.34    0.12 
   2  -4   2   -0.39    0.26 
   2  -4   2    0.15    0.12 
   2  -4   2    0.57    0.20 
   2  -4   2    0.15    0.17 
  -3   4  -2   33.13    0.77 
  -3   4  -2   32.68    0.71 
  -3   4  -2   32.02    0.73 
   3  -4   2   32.34    0.75 
   3  -4   2   33.84    0.78 
   3  -4   2   31.86    0.77 
   3  -4   2   31.10    0.72 
  -4   4  -2   13.06    0.66 
  -4   4  -2   10.88    0.67 
   4  -4   2   11.23    0.68 
   4  -4   2   12.37    0.72 
   4  -4   2   12.70    0.72 
  -5   4  -2   12.25    0.16 
  -5   4  -2   12.84    0.22 
   5  -4   2   13.02    0.33 
   5  -4   2   12.08    0.21 
   5  -4   2   12.28    0.28 
   5  -4   2   12.35    0.30 
  -6   4  -2   17.75    0.46 
   6  -4   2   18.21    0.47 
   6  -4   2   18.77    0.44 
   6  -4   2   17.46    0.49 
   6  -4   2   17.94    0.48 
  -7   4  -2    7.56    0.20 
  -7   4  -2    8.03    0.34 
   7  -4   2    7.93    0.24 
   7  -4   2    7.25    0.35 
   7  -4   2    7.12    0.38 
   7  -4   2    8.11    0.27 
  -8   4  -2    2.44    0.27 
   8  -4   2    2.53    0.28 
   8  -4   2    1.94    0.28 
   8  -4   2    2.06    0.41 
   8  -4   2    2.25    0.44 
  -9   4  -2    2.60    0.45 
  -9   4  -2    2.87    0.32 
   9  -4   2    1.47    0.49 
   9  -4   2    2.74    0.33 
   9  -4   2    2.56    0.29 
   9  -4   2    1.89    0.45 
 -10   4  -2    3.14    0.57 
 -10   4  -2    2.83    0.37 
  10  -4   2    2.58    0.36 
  10  -4   2    2.16    0.53 
  10  -4   2    3.24    0.61 
  10  -4   2    2.73    0.33 
 -11   4  -2   20.98    0.70 
 -11   4  -2   20.56    0.47 
  11  -4   2   19.23    0.63 
  11  -4   2   20.81    0.44 
  11  -4   2   20.94    0.73 
  11  -4   2   20.58    0.50 
 -12   4  -2    3.11    0.41 
 -12   4  -2    4.99    0.62 
  12  -4   2    3.44    0.62 
  12  -4   2    3.19    0.68 
  12  -4   2    3.29    0.43 
  12  -4   2    2.90    0.31 
 -13   4  -2    6.74    0.68 
 -13   4  -2    5.52    0.42 
  13  -4   2    5.01    0.70 
  13  -4   2    5.74    0.44 
  13  -4   2    5.08    0.71 
 -14   4  -2    6.64    0.73 
  14  -4   2    4.74    0.70 
  14  -4   2    5.34    0.83 
 -15   4  -2    1.33    0.75 
  15  -4   2    1.02    0.75 
  15  -4   2    1.29    0.81 
 -16   4  -2    2.10    0.83 
  16  -4   2    1.58    0.80 
  16  -4   2    2.16    0.90 
 -17   4  -2    0.98    0.94 
  17  -4   2    0.73    0.85 
  17  -4   2    0.13    0.94 
  18  -4   2    3.29    0.88 
  19   3  -2    2.23    0.89 
  18   3  -2    1.17    0.80 
  17   3  -2    1.04    0.79 
  16   3  -2    3.53    0.72 
 -16  -3   2    2.82    0.53 
  15   3  -2    5.06    0.75 
 -15  -3   2    4.73    0.52 
 -15  -3   2    4.05    0.83 
  14   3  -2    0.08    0.61 
  14   3  -2   -0.34    0.69 
 -14  -3   2   -0.01    0.62 
 -14  -3   2    0.19    0.49 
  13   3  -2   19.56    0.65 
  13   3  -2   19.88    0.73 
 -13  -3   2   20.13    0.51 
 -13  -3   2   20.49    0.68 
  12   3  -2    1.46    0.54 
  12   3  -2    0.79    0.62 
 -12  -3   2    1.46    0.39 
 -12  -3   2    0.63    0.41 
 -12  -3   2    1.61    0.55 
  11   3  -2    0.29    0.48 
  11   3  -2    0.54    0.28 
  11   3  -2    1.02    0.58 
 -11  -3   2    0.56    0.52 
 -11  -3   2    0.49    0.39 
 -11  -3   2    0.70    0.36 
  10   3  -2   37.17    0.59 
  10   3  -2   37.06    0.51 
 -10  -3   2   37.03    0.46 
 -10  -3   2   37.26    0.41 
 -10  -3   2   36.97    0.55 
   9   3  -2   13.58    0.38 
   9   3  -2   13.23    0.49 
   9   3  -2   13.12    0.41 
  -9  -3   2   13.27    0.36 
  -9  -3   2   13.73    0.46 
  -9  -3   2   13.63    0.31 
   8   3  -2    0.96    0.41 
   8   3  -2    1.59    0.19 
   8   3  -2    0.87    0.36 
   8   3  -2    1.34    0.32 
  -8  -3   2    1.23    0.31 
  -8  -3   2    1.48    0.27 
  -8  -3   2    1.51    0.40 
   7   3  -2    9.43    0.39 
   7   3  -2    9.67    0.18 
   7   3  -2    9.60    0.31 
   7   3  -2    9.17    0.33 
  -7  -3   2    9.93    0.37 
  -7  -3   2    9.93    0.26 
  -7  -3   2   10.15    0.31 
  -7  -3   2   10.09    0.19 
   6   3  -2   -0.16    0.35 
   6   3  -2    0.66    0.29 
   6   3  -2    0.24    0.30 
   6   3  -2    1.08    0.68 
  -6  -3   2    0.65    0.28 
  -6  -3   2    0.80    0.20 
  -6  -3   2    0.39    0.23 
  -6  -3   2   -0.12    0.33 
   5   3  -2    0.84    0.28 
   5   3  -2    0.61    0.27 
   5   3  -2    0.20    0.31 
   5   3  -2    0.97    0.26 
   5   3  -2    1.49    0.66 
  -5  -3   2    1.20    0.31 
  -5  -3   2    0.65    0.20 
  -5  -3   2    0.74    0.30 
  -5  -3   2    0.52    0.19 
  -5  -3   2    0.83    0.24 
  -5  -3   2    0.71    0.26 
   4   3  -2    5.17    0.25 
   4   3  -2    4.38    0.28 
   4   3  -2    4.36    0.24 
   4   3  -2    4.75    0.60 
   4   3  -2    5.19    0.21 
  -4  -3   2    4.60    0.25 
  -4  -3   2    4.80    0.21 
  -4  -3   2    4.93    0.28 
  -4  -3   2    4.93    0.24 
  -4  -3   2    5.67    0.29 
  -4  -3   2    4.79    0.19 
   3   3  -2  467.38    6.97 
   3   3  -2  465.80    6.90 
   3   3  -2  467.44    6.95 
   3   3  -2  469.69    6.91 
   3   3  -2  464.02    6.92 
  -3  -3   2  463.64    6.92 
  -3  -3   2  460.53    6.94 
  -3  -3   2  463.22    6.91 
  -3  -3   2  467.31    6.91 
  -3  -3   2  464.65    6.97 
  -3  -3   2  473.69    6.91 
   2   3  -2  256.24    2.78 
   2   3  -2  253.81    2.78 
   2   3  -2  252.68    2.82 
   2   3  -2  254.84    2.80 
  -2  -3   2  258.27    2.79 
  -2  -3   2  253.70    2.79 
  -2  -3   2  255.62    2.80 
  -2  -3   2  252.45    2.82 
  -2  -3   2  256.68    2.86 
   1   3  -2   42.09    0.97 
  -1  -3   2   41.45    1.04 
  -1  -3   2   41.93    0.98 
  -1  -3   2   43.34    0.98 
   0   3  -2   16.99    0.43 
   0  -3   2   16.48    0.43 
   0  -3   2   16.95    0.43 
   0  -3   2   16.55    0.43 
  -1   3  -2    1.39    0.09 
  -1   3  -2    1.33    0.07 
   1  -3   2    1.41    0.08 
   1  -3   2    1.29    0.10 
  -2   3  -2    7.07    0.17 
  -2   3  -2    6.71    0.12 
  -2   3  -2    6.67    0.12 
   2  -3   2    6.83    0.15 
   2  -3   2    6.81    0.11 
   2  -3   2    7.23    0.17 
  -3   3  -2    3.89    0.30 
  -3   3  -2    3.69    0.29 
  -3   3  -2    3.60    0.27 
   3  -3   2    3.56    0.29 
   3  -3   2    3.47    0.24 
   3  -3   2    4.36    0.31 
  -4   3  -2    7.32    0.25 
  -4   3  -2    8.02    0.20 
  -4   3  -2    7.54    0.04 
   4  -3   2    7.45    0.25 
   4  -3   2    7.21    0.26 
  -5   3  -2    0.03    0.26 
  -5   3  -2    0.09    0.21 
   5  -3   2   -0.11    0.19 
   5  -3   2   -0.58    0.28 
   5  -3   2   -0.59    0.29 
  -6   3  -2   14.15    0.22 
   6  -3   2   15.83    0.40 
   6  -3   2   14.72    0.36 
   6  -3   2   14.36    0.25 
  -7   3  -2   -0.20    0.33 
  -7   3  -2   -0.36    0.22 
   7  -3   2    0.18    0.24 
   7  -3   2   -0.85    0.34 
   7  -3   2   -0.89    0.38 
   7  -3   2   -0.18    0.23 
  -8   3  -2   48.03    1.21 
  -8   3  -2   47.83    1.11 
   8  -3   2   49.18    1.12 
   8  -3   2   49.59    1.26 
   8  -3   2   47.90    1.19 
   8  -3   2   45.86    1.07 
  -9   3  -2   29.48    0.43 
   9  -3   2   32.38    0.59 
   9  -3   2   29.93    0.43 
   9  -3   2   30.69    0.58 
 -10   3  -2  194.42    2.13 
 -10   3  -2  193.96    2.01 
  10  -3   2  197.49    2.18 
  10  -3   2  195.17    2.03 
  10  -3   2  191.01    2.08 
  10  -3   2  189.12    1.95 
 -11   3  -2    8.73    0.58 
 -11   3  -2    7.46    0.39 
  11  -3   2    7.80    0.64 
  11  -3   2    6.93    0.29 
  11  -3   2    7.02    0.54 
  11  -3   2    7.61    0.39 
 -12   3  -2   29.13    1.02 
 -12   3  -2   27.66    0.78 
  12  -3   2   26.66    0.86 
  12  -3   2   28.61    0.79 
  12  -3   2   30.47    1.11 
 -13   3  -2    2.09    0.66 
 -13   3  -2    0.44    0.44 
  13  -3   2    0.70    0.71 
  13  -3   2    1.03    0.44 
  13  -3   2    0.54    0.61 
 -14   3  -2    7.62    0.53 
 -14   3  -2    8.14    0.72 
  14  -3   2    7.49    0.72 
  14  -3   2    7.70    0.63 
  14  -3   2    7.84    0.85 
 -15   3  -2    1.57    0.79 
  15  -3   2    0.41    0.74 
  15  -3   2    1.84    0.80 
 -16   3  -2    4.04    0.76 
  16  -3   2    3.86    0.79 
  16  -3   2    3.08    0.86 
 -17   3  -2    1.95    0.82 
  17  -3   2    1.78    1.01 
  17  -3   2    2.25    0.81 
  18  -3   2    3.33    0.83 
  19  -3   2    2.97    1.02 
  19   2  -2    2.00    0.87 
  18   2  -2    0.77    0.80 
  17   2  -2    2.68    0.77 
  16   2  -2    0.63    0.72 
 -16  -2   2    0.62    0.55 
  15   2  -2    0.98    0.66 
  15   2  -2    1.48    0.84 
 -15  -2   2    1.06    0.64 
 -15  -2   2    0.93    0.52 
  14   2  -2    3.92    0.74 
  14   2  -2    4.08    0.64 
 -14  -2   2    3.70    0.46 
 -14  -2   2    4.79    0.65 
  13   2  -2    8.47    0.70 
  13   2  -2    8.48    0.60 
 -13  -2   2    8.90    0.46 
 -13  -2   2    8.53    0.59 
  12   2  -2    3.82    0.67 
  12   2  -2    3.34    0.53 
 -12  -2   2    3.79    0.42 
 -12  -2   2    3.65    0.58 
  11   2  -2   45.96    0.53 
  11   2  -2   46.05    0.64 
 -11  -2   2   47.05    0.43 
 -11  -2   2   46.47    0.56 
 -11  -2   2   46.79    0.46 
  10   2  -2    5.34    0.59 
  10   2  -2    5.36    0.50 
 -10  -2   2    5.69    0.44 
 -10  -2   2    5.79    0.39 
 -10  -2   2    5.00    0.52 
   9   2  -2   26.29    0.51 
   9   2  -2   26.96    0.45 
   9   2  -2   27.68    0.44 
  -9  -2   2   27.89    0.43 
  -9  -2   2   26.86    0.48 
  -9  -2   2   28.91    0.39 
   8   2  -2   14.24    0.44 
   8   2  -2   13.56    0.50 
   8   2  -2   14.52    0.47 
  -8  -2   2   13.90    0.48 
  -8  -2   2   14.99    0.39 
  -8  -2   2   15.11    0.43 
   7   2  -2    2.40    0.32 
   7   2  -2    1.78    0.37 
   7   2  -2    2.79    0.31 
  -7  -2   2    2.25    0.37 
  -7  -2   2    3.29    0.31 
  -7  -2   2    3.14    0.27 
   6   2  -2  121.35    1.36 
   6   2  -2  121.68    1.31 
   6   2  -2  122.86    1.37 
  -6  -2   2  123.53    1.29 
  -6  -2   2  121.16    1.35 
  -6  -2   2  122.80    1.30 
   5   2  -2  160.46    1.97 
   5   2  -2  161.48    1.96 
   5   2  -2  161.08    2.03 
   5   2  -2  164.41    2.02 
  -5  -2   2  162.44    1.97 
  -5  -2   2  159.70    1.92 
  -5  -2   2  160.10    1.97 
  -5  -2   2  157.92    1.95 
  -5  -2   2  163.51    2.01 
   4   2  -2   71.74    1.24 
   4   2  -2   70.20    1.18 
   4   2  -2   71.27    1.17 
   4   2  -2   71.58    1.32 
  -4  -2   2   71.74    1.17 
  -4  -2   2   70.82    1.19 
  -4  -2   2   72.07    1.25 
  -4  -2   2   70.25    1.17 
   3   2  -2    1.01    0.21 
   3   2  -2    1.34    0.21 
   3   2  -2    1.13    0.24 
   3   2  -2    1.14    0.18 
   3   2  -2    1.35    0.45 
  -3  -2   2    1.10    0.22 
  -3  -2   2    1.26    0.24 
  -3  -2   2    1.25    0.22 
  -3  -2   2    0.99    0.20 
   2   2  -2  441.61    7.96 
   2   2  -2  434.03    7.98 
   2   2  -2  443.35    7.99 
   2   2  -2  440.91    7.95 
   2   2  -2  432.85    7.96 
  -2  -2   2  425.88    7.98 
  -2  -2   2  435.31    7.98 
  -2  -2   2  430.96    7.96 
  -2  -2   2  430.60    7.96 
  -2  -2   2  436.95    7.96 
   1   2  -2    7.55    0.25 
   1   2  -2    7.32    0.25 
  -1  -2   2    6.97    0.25 
  -1  -2   2    7.09    0.30 
   1  -2   2   27.23    0.32 
  -2   2  -2   82.56    1.01 
   2  -2   2   82.38    1.01 
  -3   2  -2  139.44    2.33 
  -3   2  -2  142.92    2.34 
   3  -2   2  139.56    2.33 
   3  -2   2  144.46    2.35 
  -4   2  -2  144.54    2.87 
  -4   2  -2  142.43    2.89 
   4  -2   2  145.11    2.89 
   4  -2   2  145.08    2.88 
   4  -2   2  143.37    2.87 
  -5   2  -2   20.36    0.31 
  -5   2  -2   20.52    0.23 
  -5   2  -2   20.70    0.27 
   5  -2   2   20.01    0.33 
   5  -2   2   21.29    0.25 
   5  -2   2   20.24    0.33 
  -6   2  -2    7.90    0.20 
  -6   2  -2    8.25    0.31 
   6  -2   2    7.49    0.31 
   6  -2   2    7.79    0.22 
   6  -2   2    8.06    0.34 
  -7   2  -2    8.31    0.37 
  -7   2  -2    7.39    0.24 
   7  -2   2    8.38    0.41 
   7  -2   2    7.21    0.36 
   7  -2   2    7.69    0.25 
  -8   2  -2   30.01    0.61 
   8  -2   2   28.22    0.68 
   8  -2   2   29.92    0.63 
  -9   2  -2  117.19    2.19 
  -9   2  -2  113.06    2.11 
   9  -2   2  112.22    2.16 
   9  -2   2  112.63    2.11 
  10  -2   2   22.37    0.63 
  10  -2   2   21.80    0.57 
  10  -2   2   21.14    0.34 
 -11   2  -2    4.14    0.64 
 -11   2  -2    4.09    0.46 
  11  -2   2    5.30    0.50 
  11  -2   2    4.67    0.72 
  11  -2   2    2.67    0.61 
 -12   2  -2    2.19    0.59 
 -12   2  -2    2.19    0.38 
  12  -2   2    1.63    0.66 
  12  -2   2    1.63    0.40 
  12  -2   2    1.62    0.58 
 -13   2  -2    0.24    0.44 
 -13   2  -2    1.27    0.63 
  13  -2   2    0.56    0.45 
  13  -2   2    0.36    0.61 
  13  -2   2    0.36    0.71 
 -14   2  -2    1.96    0.70 
 -14   2  -2    0.89    0.47 
  14  -2   2    0.89    0.74 
  14  -2   2    0.87    0.65 
  14  -2   2    0.68    0.47 
 -15   2  -2    3.13    0.74 
  15  -2   2    2.15    0.78 
  15  -2   2    1.70    0.69 
 -16   2  -2    0.57    0.79 
  16  -2   2    0.47    0.76 
  16  -2   2    0.43    0.83 
  17  -2   2    3.11    0.81 
  18  -2   2    1.26    0.85 
  19  -2   2    1.34    1.00 
  19   1  -2    1.74    0.94 
  18   1  -2    3.21    0.85 
  17   1  -2    0.88    0.78 
  16   1  -2    2.25    0.74 
  15   1  -2    2.36    0.68 
  15   1  -2    2.21    0.87 
 -15  -1   2    2.03    0.68 
 -15  -1   2    1.71    0.48 
  14   1  -2    3.42    0.62 
  14   1  -2    2.70    0.73 
 -14  -1   2    3.64    0.46 
 -14  -1   2    3.96    0.65 
  13   1  -2    0.17    0.58 
  13   1  -2    0.91    0.74 
 -13  -1   2    0.50    0.63 
 -13  -1   2    0.09    0.44 
  12   1  -2    0.12    0.66 
  12   1  -2   -0.17    0.54 
 -12  -1   2    0.16    0.56 
 -12  -1   2   -0.64    0.38 
  11   1  -2   -0.20    0.58 
  11   1  -2    0.25    0.50 
 -11  -1   2    0.64    0.53 
 -11  -1   2    0.16    0.36 
  10   1  -2    4.32    0.46 
  10   1  -2    4.46    0.55 
 -10  -1   2    4.88    0.48 
 -10  -1   2    4.72    0.36 
 -10  -1   2    4.51    0.32 
   9   1  -2   11.63    0.42 
   9   1  -2   12.90    0.54 
   9   1  -2   12.07    0.47 
  -9  -1   2   12.98    0.49 
  -9  -1   2   12.49    0.40 
  -9  -1   2   11.97    0.34 
   8   1  -2  165.84    1.73 
   8   1  -2  163.12    1.63 
   8   1  -2  164.81    1.72 
  -8  -1   2  166.44    1.61 
  -8  -1   2  164.86    1.68 
  -8  -1   2  164.80    1.62 
   7   1  -2   19.57    0.49 
   7   1  -2   19.10    0.48 
   7   1  -2   20.04    0.56 
  -7  -1   2   19.99    0.43 
  -7  -1   2   20.69    0.65 
  -7  -1   2   20.07    0.51 
   6   1  -2   27.35    0.49 
   6   1  -2   28.37    0.63 
   6   1  -2   27.39    0.43 
  -6  -1   2   27.26    0.43 
  -6  -1   2   27.49    0.38 
  -6  -1   2   27.41    0.47 
   5   1  -2    3.07    0.24 
   5   1  -2    3.39    0.29 
   5   1  -2    2.00    0.32 
   5   1  -2    2.53    0.28 
  -5  -1   2    2.70    0.26 
  -5  -1   2    2.22    0.31 
  -5  -1   2    2.89    0.27 
  -5  -1   2    2.42    0.21 
   4   1  -2    0.12    0.29 
   4   1  -2    0.67    0.24 
   4   1  -2    0.30    0.24 
   4   1  -2    0.78    0.22 
  -4  -1   2    0.76    0.25 
  -4  -1   2    0.68    0.29 
  -4  -1   2    0.68    0.19 
  -4  -1   2    0.89    0.23 
   3   1  -2   16.03    0.37 
   3   1  -2   15.93    0.28 
   3   1  -2   16.11    0.29 
  -3  -1   2   16.25    0.29 
  -3  -1   2   16.10    0.38 
  -3  -1   2   15.62    0.27 
   2   1  -2    0.49    0.11 
   2   1  -2    0.48    0.12 
   2   1  -2    0.63    0.22 
   2   1  -2    0.64    0.13 
  -2  -1   2    0.48    0.12 
  -2  -1   2    0.94    0.15 
  -2  -1   2    0.48    0.12 
  -2  -1   2    0.27    0.10 
   1   1  -2   24.84    0.13 
   0   1  -2    0.07    0.01 
   0   1  -2    0.18    0.03 
   0  -1   2    0.00    0.02 
   0  -1   2    0.33    0.03 
  -1   1  -2    0.28    0.03 
  -1   1  -2    0.23    0.01 
   1  -1   2    0.25    0.02 
   1  -1   2    0.23    0.04 
   2  -1   2   13.76    0.47 
   2  -1   2   13.26    0.48 
  -3   1  -2   40.38    0.65 
  -3   1  -2   41.81    0.69 
   3  -1   2   39.23    0.64 
   3  -1   2   40.00    0.66 
   3  -1   2   41.79    0.69 
  -4   1  -2    1.98    0.19 
  -4   1  -2    1.72    0.26 
  -4   1  -2    1.64    0.22 
   4  -1   2    2.29    0.19 
   4  -1   2    1.33    0.24 
   4  -1   2    1.62    0.27 
  -5   1  -2    2.29    0.28 
  -5   1  -2    2.48    0.24 
  -5   1  -2    2.09    0.19 
   5  -1   2    1.88    0.28 
   5  -1   2    2.15    0.21 
   5  -1   2    2.26    0.31 
  -6   1  -2   59.46    0.84 
  -6   1  -2   58.39    0.92 
   6  -1   2   58.21    0.94 
   6  -1   2   59.11    0.89 
   6  -1   2   59.57    0.85 
  -7   1  -2   38.78    0.60 
  -7   1  -2   39.80    0.50 
   7  -1   2   37.98    0.51 
   7  -1   2   39.99    0.50 
   7  -1   2   37.94    0.54 
  -8   1  -2   77.17    1.67 
  -8   1  -2   79.92    1.61 
   8  -1   2   78.32    1.70 
   8  -1   2   82.09    1.62 
   8  -1   2   78.51    1.65 
  -9   1  -2    3.19    0.37 
   9  -1   2    2.19    0.48 
   9  -1   2    3.30    0.38 
 -10   1  -2  276.95    2.85 
 -10   1  -2  280.81    2.78 
  10  -1   2  281.77    2.79 
  10  -1   2  278.57    2.89 
  10  -1   2  273.56    2.81 
 -11   1  -2   44.26    0.71 
 -11   1  -2   44.43    0.55 
  11  -1   2   46.28    0.71 
  11  -1   2   43.98    0.70 
  11  -1   2   45.34    0.79 
 -12   1  -2   12.33    0.63 
 -12   1  -2   12.69    0.43 
  12  -1   2   11.79    0.64 
  12  -1   2   11.90    0.71 
  12  -1   2   13.15    0.47 
 -13   1  -2    6.77    0.64 
 -13   1  -2    6.44    0.44 
  13  -1   2    6.69    0.46 
  13  -1   2    6.17    0.68 
  13  -1   2    5.93    0.72 
 -14   1  -2    0.85    0.47 
 -14   1  -2    1.14    0.66 
  14  -1   2    0.28    0.63 
  14  -1   2    0.89    0.76 
  14  -1   2    1.03    0.44 
 -15   1  -2    7.96    0.66 
 -15   1  -2    8.10    0.50 
  15  -1   2    7.99    0.69 
  15  -1   2    8.77    0.82 
  15  -1   2    7.59    0.61 
 -16   1  -2    1.07    0.81 
  16  -1   2    0.43    0.76 
  16  -1   2    0.35    0.86 
  17  -1   2    4.55    0.77 
  18  -1   2    3.15    0.86 
  19  -1   2    0.37    0.97 
  19   0  -2    3.03    0.91 
  18   0  -2    0.80    0.79 
  17   0  -2    1.02    0.79 
  16   0  -2   11.25    0.78 
  15   0  -2    2.22    0.84 
  15   0  -2    1.93    0.68 
 -15   0   2    1.30    0.47 
 -15   0   2    0.92    0.66 
  14   0  -2    4.55    0.84 
  14   0  -2    2.90    0.62 
 -14   0   2    2.97    0.48 
 -14   0   2    3.35    0.65 
  13   0  -2    0.48    0.59 
  13   0  -2   -0.21    0.68 
 -13   0   2    0.98    0.43 
 -13   0   2   -0.08    0.60 
  12   0  -2   28.58    0.72 
  12   0  -2   28.52    0.60 
 -12   0   2   29.41    0.63 
 -12   0   2   29.49    0.48 
  11   0  -2    7.84    0.59 
  11   0  -2    7.93    0.48 
 -11   0   2    8.07    0.36 
 -11   0   2    7.86    0.52 
  10   0  -2    0.54    0.47 
  10   0  -2    0.10    0.56 
 -10   0   2    0.79    0.49 
 -10   0   2    0.47    0.33 
   9   0  -2    1.53    0.49 
   9   0  -2    1.30    0.41 
  -9   0   2    1.92    0.46 
  -9   0   2    1.95    0.32 
  -9   0   2    1.70    0.29 
   8   0  -2   37.81    0.97 
   8   0  -2   36.93    0.84 
  -8   0   2   38.27    0.92 
  -8   0   2   39.33    0.82 
  -8   0   2   39.30    0.81 
   7   0  -2    6.44    0.30 
   7   0  -2    6.14    0.38 
  -7   0   2    6.82    0.28 
  -7   0   2    7.01    0.37 
  -7   0   2    6.55    0.23 
   6   0  -2    6.33    0.51 
   6   0  -2    5.92    0.45 
  -6   0   2    5.92    0.39 
  -6   0   2    6.68    0.48 
  -6   0   2    5.37    0.46 
   5   0  -2   11.88    0.36 
   5   0  -2   12.29    0.41 
   5   0  -2   12.21    0.33 
  -5   0   2   11.96    0.35 
  -5   0   2   11.60    0.30 
  -5   0   2   12.95    0.41 
  -5   0   2   12.48    0.35 
   4   0  -2    2.11    0.25 
   4   0  -2    2.83    0.23 
   4   0  -2    2.25    0.29 
  -4   0   2    2.52    0.24 
  -4   0   2    2.71    0.20 
  -4   0   2    2.37    0.28 
  -4   0   2    2.58    0.24 
   3   0  -2    1.28    0.18 
   3   0  -2    0.65    0.18 
   3   0  -2    0.38    0.21 
  -3   0   2    1.22    0.18 
  -3   0   2    0.48    0.20 
  -3   0   2    1.66    0.16 
  -3   0   2    0.96    0.18 
   2   0  -2  125.38    2.70 
   2   0  -2  127.41    2.70 
  -2   0   2  116.48    2.70 
  -2   0   2  122.51    2.69 
  -1   0   2    0.28    0.03 
   0   0  -2    0.02    0.02 
   0   0  -2    0.11    0.02 
   0   0   2    0.04    0.01 
   0   0   2    0.04    0.03 
  -1   0  -2    0.35    0.03 
  -1   0  -2   -0.07    0.02 
  -1   0  -2    0.09    0.03 
   1   0   2   -0.25    0.03 
   1   0   2    0.09    0.02 
  -2   0  -2  151.11    2.83 
  -3   0  -2   59.76    1.22 
  -3   0  -2   59.65    1.20 
  -3   0  -2   58.36    1.19 
   3   0   2   58.36    1.20 
   3   0   2   59.72    1.22 
   3   0   2   57.85    1.19 
  -4   0  -2  299.76    3.93 
  -4   0  -2  298.53    3.92 
  -4   0  -2  292.25    3.94 
   4   0   2  294.56    3.94 
   4   0   2  299.88    3.93 
   4   0   2  300.53    3.92 
  -5   0  -2   56.85    0.73 
  -5   0  -2   60.53    0.81 
  -5   0  -2   58.80    0.75 
   5   0   2   61.04    0.86 
   5   0   2   57.90    0.74 
   5   0   2   57.87    0.76 
  -6   0  -2   88.33    1.25 
  -6   0  -2   82.32    1.29 
   6   0   2   87.96    1.27 
   6   0   2   84.17    1.28 
   6   0   2   82.79    1.31 
   6   0   2   87.55    1.25 
  -7   0  -2   24.98    0.32 
  -7   0  -2   25.82    0.43 
   7   0   2   24.40    0.31 
   7   0   2   24.94    0.42 
   7   0   2   25.66    0.47 
  -8   0  -2  209.59    1.63 
   8   0   2  210.17    1.66 
   8   0   2  211.93    1.61 
  -9   0  -2   56.70    1.07 
  -9   0  -2   57.18    0.97 
   9   0   2   58.00    1.15 
   9   0   2   55.80    1.03 
   9   0   2   58.50    0.99 
 -10   0  -2    3.42    0.52 
  10   0   2    1.99    0.48 
 -11   0  -2   12.94    0.43 
 -11   0  -2   11.80    0.59 
  11   0   2   12.82    0.44 
  11   0   2   11.24    0.63 
  11   0   2   10.91    0.55 
 -12   0  -2    0.44    0.36 
 -12   0  -2    1.70    0.57 
  12   0   2    0.56    0.54 
  12   0   2    1.22    0.38 
  12   0   2   -0.01    0.62 
 -13   0  -2    1.24    0.63 
 -13   0  -2    0.22    0.39 
  13   0   2    0.28    0.68 
  13   0   2   -0.87    0.61 
  13   0   2    0.43    0.45 
 -14   0  -2    7.46    0.44 
 -14   0  -2    8.12    0.67 
  14   0   2    7.24    0.74 
  14   0   2    7.42    0.45 
  14   0   2    7.48    0.69 
 -15   0  -2    0.31    0.46 
 -15   0  -2    0.27    0.68 
  15   0   2    0.55    0.46 
  15   0   2    0.55    0.77 
  15   0   2    1.08    0.68 
 -16   0  -2    1.32    0.70 
  16   0   2    1.31    0.78 
  16   0   2    1.67    0.70 
  17   0   2    0.69    0.74 
  18   0   2    3.98    0.83 
  19   0   2    0.14    0.82 
  19  -1  -2    2.05    0.95 
  18  -1  -2    0.64    0.83 
  17  -1  -2    0.98    0.79 
  16  -1  -2    0.49    0.75 
 -16   1   2   -0.27    0.70 
  15  -1  -2    5.85    0.87 
  15  -1  -2    4.96    0.66 
 -15   1   2    5.59    0.57 
 -15   1   2    5.18    0.68 
  14  -1  -2    0.29    0.61 
  14  -1  -2   -0.59    0.77 
 -14   1   2   -0.11    0.45 
 -14   1   2    0.47    0.65 
  13  -1  -2    2.21    0.62 
  13  -1  -2    2.49    0.76 
 -13   1   2    2.71    0.47 
 -13   1   2    3.05    0.62 
  12  -1  -2   14.21    0.74 
  12  -1  -2   14.86    0.62 
 -12   1   2   15.81    0.48 
 -12   1   2   14.26    0.62 
  11  -1  -2   -0.68    0.51 
  11  -1  -2   -0.12    0.62 
 -11   1   2   -0.49    0.34 
 -11   1   2   -0.22    0.53 
  10  -1  -2   -0.29    0.48 
  10  -1  -2    0.19    0.58 
 -10   1   2    0.23    0.33 
 -10   1   2    0.41    0.50 
   9  -1  -2   -0.59    0.41 
   9  -1  -2   -0.66    0.51 
  -9   1   2    0.07    0.29 
  -9   1   2    0.17    0.46 
   8  -1  -2   59.06    0.97 
   8  -1  -2   59.34    0.87 
  -8   1   2   61.92    0.84 
  -8   1   2   59.77    0.94 
  -8   1   2   61.76    0.84 
   7  -1  -2    0.39    0.31 
   7  -1  -2    0.06    0.39 
  -7   1   2    0.59    0.23 
  -7   1   2    0.73    0.27 
  -7   1   2    0.56    0.36 
   6  -1  -2  152.21    1.67 
   6  -1  -2  154.06    1.67 
   6  -1  -2  155.36    1.73 
  -6   1   2  153.85    1.66 
  -6   1   2  154.96    1.71 
  -6   1   2  154.11    1.65 
   5  -1  -2   29.28    0.67 
   5  -1  -2   29.63    0.74 
   5  -1  -2   32.17    0.66 
  -5   1   2   31.26    0.64 
  -5   1   2   30.45    0.74 
  -5   1   2   30.91    0.66 
  -5   1   2   30.96    0.64 
   4  -1  -2    8.11    0.20 
   4  -1  -2    7.57    0.27 
   4  -1  -2    7.56    0.23 
  -4   1   2    7.98    0.21 
  -4   1   2    7.92    0.22 
  -4   1   2    8.01    0.15 
  -4   1   2    7.66    0.27 
  -4   1   2    7.95    0.18 
   3  -1  -2   50.73    1.12 
   3  -1  -2   49.28    1.12 
   3  -1  -2   46.69    1.14 
  -3   1   2   47.31    1.14 
  -3   1   2   50.31    1.12 
  -3   1   2   50.12    1.11 
  -3   1   2   49.12    1.11 
   2  -1  -2  150.43    1.85 
   2  -1  -2  150.91    1.84 
  -2   1   2  151.90    1.84 
  -2   1   2  156.39    1.85 
   1  -1  -2    0.07    0.03 
   1  -1  -2    0.42    0.06 
  -1   1   2    0.27    0.05 
  -1   1   2    0.25    0.04 
   0  -1  -2    0.05    0.02 
   0  -1  -2   -0.19    0.05 
   0  -1  -2   -0.07    0.03 
   0   1   2    0.04    0.02 
   0   1   2    0.05    0.03 
   0   1   2    0.91    0.04 
  -1  -1  -2   24.44    0.04 
   1   1   2   24.49    0.05 
   1   1   2   24.59    0.05 
  -2  -1  -2    3.47    0.19 
   2   1   2    4.47    0.24 
   2   1   2    3.75    0.21 
  -3  -1  -2   39.26    0.94 
  -3  -1  -2   41.34    0.93 
  -3  -1  -2   42.07    0.92 
   3   1   2   42.43    0.92 
   3   1   2   39.15    0.95 
   3   1   2   41.30    0.93 
  -4  -1  -2   14.35    0.40 
  -4  -1  -2   13.40    0.48 
   4   1   2   13.62    0.42 
  -5  -1  -2   23.28    0.52 
  -5  -1  -2   23.69    0.50 
  -5  -1  -2   22.21    0.60 
   5   1   2   22.25    0.54 
   5   1   2   23.98    0.51 
   5   1   2   24.25    0.51 
   5   1   2   22.30    0.53 
  -6  -1  -2   20.47    0.23 
  -6  -1  -2   20.19    0.31 
   6   1   2   19.65    0.32 
   6   1   2   19.96    0.34 
   6   1   2   20.55    0.23 
  -7  -1  -2   84.19    0.84 
  -7  -1  -2   86.52    0.94 
   7   1   2   85.28    0.89 
   7   1   2   84.45    0.84 
   7   1   2   86.83    0.98 
  -8  -1  -2    2.57    0.38 
  -8  -1  -2    2.16    0.26 
   8   1   2    1.81    0.25 
   8   1   2    1.81    0.41 
   8   1   2    1.39    0.35 
  -9  -1  -2   20.66    0.44 
  -9  -1  -2   20.23    0.32 
   9   1   2   20.28    0.31 
   9   1   2   19.82    0.43 
   9   1   2   20.16    0.49 
 -10  -1  -2    1.58    0.47 
 -10  -1  -2    1.20    0.33 
  10   1   2    1.07    0.32 
  10   1   2    0.42    0.46 
  10   1   2    1.14    0.52 
 -11  -1  -2    4.67    0.40 
 -11  -1  -2    3.91    0.54 
  11   1   2    3.56    0.37 
  11   1   2    2.79    0.51 
  11   1   2    2.95    0.59 
 -12  -1  -2   11.60    0.60 
 -12  -1  -2   10.48    0.38 
  12   1   2   10.32    0.39 
  12   1   2   10.59    0.66 
  12   1   2    9.84    0.53 
 -13  -1  -2    1.13    0.41 
 -13  -1  -2    2.51    0.63 
  13   1   2    1.95    0.44 
  13   1   2    1.49    0.72 
  13   1   2    0.65    0.58 
 -14  -1  -2   16.13    0.71 
 -14  -1  -2   14.77    0.45 
  14   1   2   16.04    0.80 
  14   1   2   14.94    0.67 
  14   1   2   15.66    0.49 
 -15  -1  -2    0.01    0.44 
 -15  -1  -2    0.11    0.68 
  15   1   2   -0.98    0.76 
  15   1   2   -0.21    0.46 
  15   1   2    0.36    0.65 
 -16  -1  -2    0.52    0.78 
 -16  -1  -2    0.85    0.58 
  16   1   2    1.92    0.71 
  17   1   2    0.66    0.74 
  18   1   2    4.88    0.85 
  19   1   2    0.76    0.89 
  19  -2  -2    1.51    0.96 
  18  -2  -2    5.37    0.88 
  17  -2  -2    1.81    0.78 
  16  -2  -2    0.97    0.73 
  16  -2  -2    1.72    0.99 
 -16   2   2    0.71    0.76 
  15  -2  -2    0.43    0.66 
  15  -2  -2    0.22    0.87 
 -15   2   2   -0.45    0.68 
  14  -2  -2    3.46    0.66 
  14  -2  -2    3.35    0.83 
 -14   2   2    3.84    0.68 
 -14   2   2    3.49    0.47 
  13  -2  -2   -0.18    0.71 
  13  -2  -2   -0.02    0.58 
 -13   2   2    0.31    0.41 
 -13   2   2    0.78    0.62 
  12  -2  -2    6.71    0.59 
  12  -2  -2    6.28    0.71 
 -12   2   2    6.88    0.59 
 -12   2   2    7.14    0.45 
  11  -2  -2    2.25    0.61 
  11  -2  -2    1.83    0.51 
 -11   2   2    2.26    0.53 
 -11   2   2    2.05    0.35 
  10  -2  -2   -0.09    0.46 
  10  -2  -2    0.31    0.57 
 -10   2   2    0.27    0.52 
 -10   2   2    1.00    0.33 
   9  -2  -2   -0.51    0.50 
   9  -2  -2   -0.14    0.39 
  -9   2   2   -0.39    0.44 
  -9   2   2    0.27    0.28 
   8  -2  -2   81.15    0.91 
   8  -2  -2   79.43    0.78 
  -8   2   2   81.02    0.90 
  -8   2   2   81.80    0.75 
   7  -2  -2    3.80    0.31 
   7  -2  -2    3.67    0.38 
  -7   2   2    4.33    0.37 
  -7   2   2    4.52    0.24 
   6  -2  -2    0.04    0.28 
   6  -2  -2    0.17    0.35 
   6  -2  -2    0.52    0.24 
  -6   2   2    0.40    0.15 
  -6   2   2    0.33    0.32 
  -6   2   2    0.04    0.19 
  -6   2   2    0.54    0.24 
   5  -2  -2    4.21    0.28 
   5  -2  -2    5.29    0.25 
   5  -2  -2    4.22    0.32 
  -5   2   2    5.31    0.22 
  -5   2   2    4.72    0.23 
  -5   2   2    5.18    0.20 
  -5   2   2    4.56    0.25 
  -5   2   2    4.43    0.30 
   4  -2  -2   12.73    0.31 
   4  -2  -2   12.11    0.33 
   4  -2  -2   13.33    0.29 
  -4   2   2   13.38    0.26 
  -4   2   2   12.99    0.25 
  -4   2   2   13.03    0.27 
  -4   2   2   13.05    0.29 
  -4   2   2   12.58    0.33 
   3  -2  -2  119.42    1.40 
   3  -2  -2  120.55    1.42 
   3  -2  -2  118.61    1.40 
  -3   2   2  121.06    1.42 
  -3   2   2  120.13    1.40 
  -3   2   2  117.08    1.39 
  -3   2   2  117.12    1.40 
   2  -2  -2   68.86    2.02 
   2  -2  -2   73.80    2.03 
   2  -2  -2   74.36    2.04 
  -2   2   2   75.33    2.04 
  -2   2   2   73.66    2.03 
  -2   2   2   70.88    2.03 
  -2   2   2   69.70    2.03 
  -1   2   2   20.57    0.25 
   0  -2  -2   97.10    0.59 
   1   2   2   54.49    0.38 
   1   2   2   53.01    0.41 
   1   2   2   53.39    0.36 
   1   2   2   54.58    0.38 
  -2  -2  -2  578.96    9.89 
   2   2   2  570.66    9.90 
   2   2   2  547.21    9.88 
   2   2   2  573.95    9.90 
   2   2   2  585.05    9.89 
  -3  -2  -2   76.07    1.03 
  -3  -2  -2   74.56    1.04 
   3   2   2   75.86    1.03 
   3   2   2   74.89    1.04 
  -4  -2  -2  329.43    6.62 
  -4  -2  -2  335.74    6.61 
  -4  -2  -2  324.73    6.60 
   4   2   2  337.54    6.63 
   4   2   2  333.18    6.61 
   4   2   2  328.87    6.61 
   4   2   2  328.50    6.60 
  -5  -2  -2   12.25    0.33 
  -5  -2  -2   12.99    0.28 
  -5  -2  -2   11.62    0.34 
   5   2   2   12.10    0.34 
   5   2   2   12.99    0.32 
   5   2   2   12.84    0.28 
  -6  -2  -2   37.92    0.47 
  -6  -2  -2   37.88    0.52 
  -6  -2  -2   38.03    0.40 
   6   2   2   37.90    0.40 
   6   2   2   38.33    0.51 
   6   2   2   37.49    0.46 
  -7  -2  -2   13.02    0.39 
   7   2   2   13.59    0.40 
   7   2   2   12.56    0.43 
  -8  -2  -2    6.05    0.41 
  -8  -2  -2    6.72    0.52 
   8   2   2    6.22    0.51 
   8   2   2    6.09    0.56 
   8   2   2    5.73    0.41 
  -9  -2  -2   11.98    0.46 
  -9  -2  -2   10.21    0.30 
   9   2   2   11.24    0.51 
   9   2   2   10.00    0.42 
   9   2   2   10.16    0.30 
 -10  -2  -2    4.75    0.48 
 -10  -2  -2    3.49    0.33 
  10   2   2    3.14    0.45 
  10   2   2    3.45    0.31 
  10   2   2    3.26    0.52 
 -11  -2  -2   27.14    0.48 
 -11  -2  -2   28.17    0.65 
  11   2   2   27.57    0.49 
  11   2   2   27.57    0.63 
  11   2   2   27.65    0.70 
 -12  -2  -2   11.84    0.64 
 -12  -2  -2   11.97    0.49 
  12   2   2   10.64    0.70 
  12   2   2   12.51    0.52 
  12   2   2   10.90    0.64 
 -13  -2  -2   17.20    0.69 
 -13  -2  -2   16.14    0.48 
  13   2   2   17.05    0.77 
  13   2   2   16.07    0.64 
  13   2   2   16.17    0.49 
 -14  -2  -2   17.60    0.72 
 -14  -2  -2   17.50    0.53 
  14   2   2   17.35    0.80 
  14   2   2   17.37    0.67 
  14   2   2   17.33    0.52 
 -15  -2  -2   -0.37    0.43 
 -15  -2  -2    0.72    0.65 
  15   2   2    0.20    0.80 
  15   2   2    0.60    0.65 
  15   2   2   -0.31    0.46 
 -16  -2  -2   -0.12    0.46 
  16   2   2   -0.28    0.49 
  16   2   2    0.10    0.67 
  17   2   2    1.98    0.75 
  18   2   2    1.27    0.82 
  19   2   2    0.78    0.89 
  18  -3  -2    0.86    0.79 
  17  -3  -2   -0.06    0.76 
  16  -3  -2    3.07    0.75 
  16  -3  -2    3.33    0.95 
 -16   3   2    2.86    0.79 
  15  -3  -2    0.09    0.68 
  15  -3  -2   -0.46    0.84 
 -15   3   2   -0.23    0.73 
  14  -3  -2    6.39    0.68 
  14  -3  -2    7.58    0.87 
 -14   3   2    6.16    0.47 
 -14   3   2    6.89    0.68 
  13  -3  -2   -0.25    0.75 
  13  -3  -2   -0.44    0.60 
 -13   3   2    0.38    0.44 
 -13   3   2    1.23    0.63 
  12  -3  -2   -0.17    0.56 
  12  -3  -2   -0.73    0.71 
 -12   3   2    0.37    0.59 
 -12   3   2   -0.28    0.39 
  11  -3  -2   -0.03    0.53 
  11  -3  -2    0.27    0.64 
 -11   3   2    0.66    0.37 
 -11   3   2    0.90    0.55 
  10  -3  -2   10.13    0.59 
  10  -3  -2   10.07    0.51 
 -10   3   2   10.96    0.37 
 -10   3   2   11.31    0.53 
   9  -3  -2    1.69    0.40 
   9  -3  -2    2.15    0.53 
  -9   3   2    2.44    0.30 
  -9   3   2    2.45    0.46 
   8  -3  -2  148.30    2.12 
   8  -3  -2  145.26    2.04 
  -8   3   2  148.60    2.00 
  -8   3   2  148.23    2.09 
   7  -3  -2    1.26    0.39 
   7  -3  -2    1.18    0.31 
  -7   3   2    1.65    0.23 
  -7   3   2    1.62    0.36 
   6  -3  -2   19.37    0.55 
   6  -3  -2   21.89    0.52 
   6  -3  -2   20.04    0.54 
  -6   3   2   19.88    0.54 
  -6   3   2   22.12    0.45 
  -6   3   2   21.46    0.50 
   5  -3  -2    0.39    0.23 
   5  -3  -2   -0.30    0.26 
   5  -3  -2   -0.26    0.32 
   5  -3  -2    0.18    0.20 
  -5   3   2    0.12    0.20 
  -5   3   2    0.01    0.18 
  -5   3   2   -0.27    0.14 
  -5   3   2    0.17    0.29 
   4  -3  -2  107.75    1.77 
   4  -3  -2  105.07    1.72 
   4  -3  -2  107.49    1.73 
   4  -3  -2  106.24    1.74 
  -4   3   2  108.73    1.76 
  -4   3   2  106.58    1.72 
  -4   3   2  106.61    1.72 
   3  -3  -2    1.31    0.22 
   3  -3  -2    1.50    0.19 
   3  -3  -2    2.02    0.26 
   3  -3  -2    1.79    0.22 
  -3   3   2    1.97    0.24 
  -3   3   2    1.23    0.23 
  -3   3   2    1.79    0.18 
   2  -3  -2   47.70    0.48 
   2  -3  -2   47.90    0.45 
   2  -3  -2   47.61    0.49 
   2  -3  -2   48.53    0.46 
  -2   3   2   47.70    0.49 
  -2   3   2   46.54    0.44 
  -2   3   2   48.31    0.49 
   1  -3  -2    0.46    0.17 
   1  -3  -2    0.64    0.10 
  -1   3   2    0.57    0.09 
  -1   3   2    0.59    0.18 
   0  -3  -2   79.05    1.10 
   0  -3  -2   81.17    1.13 
   0  -3  -2   79.66    1.10 
   0  -3  -2   80.65    1.13 
   0   3   2   79.87    1.13 
   0   3   2   78.64    1.10 
  -1  -3  -2    0.60    0.08 
  -1  -3  -2    0.92    0.29 
  -1  -3  -2    0.51    0.09 
  -1  -3  -2    0.77    0.11 
  -1  -3  -2    0.60    0.15 
  -1  -3  -2    0.46    0.15 
  -1  -3  -2    0.56    0.11 
   1   3   2    0.83    0.12 
   1   3   2    0.53    0.08 
   1   3   2    0.62    0.16 
   1   3   2    0.35    0.13 
   1   3   2    0.84    0.30 
   1   3   2    0.54    0.10 
   1   3   2    0.61    0.08 
  -2  -3  -2   22.01    0.43 
  -2  -3  -2   21.30    0.32 
  -2  -3  -2   20.44    0.51 
  -2  -3  -2   21.12    0.33 
  -2  -3  -2   21.17    0.40 
   2   3   2   21.39    0.36 
   2   3   2   20.52    0.53 
   2   3   2   21.04    0.32 
   2   3   2   22.31    0.42 
   2   3   2   21.47    0.40 
   2   3   2   21.30    0.31 
   2   3   2   21.09    0.33 
  -3  -3  -2  105.34    1.75 
  -3  -3  -2  105.73    1.80 
  -3  -3  -2  107.78    1.78 
  -3  -3  -2  110.32    1.77 
   3   3   2  105.85    1.80 
   3   3   2  106.39    1.75 
   3   3   2  108.54    1.76 
   3   3   2  108.06    1.76 
   3   3   2  108.01    1.77 
   3   3   2  109.03    1.78 
   3   3   2  108.24    1.91 
  -4  -3  -2    1.05    0.26 
  -4  -3  -2    1.19    0.25 
  -4  -3  -2    0.99    0.18 
   4   3   2    1.69    0.31 
   4   3   2    1.27    0.26 
   4   3   2    0.72    0.20 
   4   3   2    1.33    0.23 
   4   3   2    0.94    0.27 
   4   3   2    1.14    0.24 
   4   3   2    0.96    0.17 
  -5  -3  -2    0.65    0.28 
  -5  -3  -2    0.99    0.27 
  -5  -3  -2    0.98    0.21 
   5   3   2    0.48    0.27 
   5   3   2    1.10    0.24 
   5   3   2    1.05    0.20 
   5   3   2    0.79    0.22 
   5   3   2    0.78    0.30 
   5   3   2    1.54    0.30 
  -6  -3  -2   -0.12    0.20 
  -6  -3  -2   -0.04    0.26 
  -6  -3  -2    0.03    0.29 
   6   3   2   -0.50    0.31 
   6   3   2    0.40    0.28 
   6   3   2   -0.01    0.19 
   6   3   2    0.36    0.20 
  -7  -3  -2   12.06    0.27 
  -7  -3  -2   11.77    0.37 
   7   3   2   11.77    0.26 
   7   3   2   11.67    0.35 
   7   3   2   11.86    0.41 
   7   3   2   11.40    0.34 
   7   3   2   12.28    0.25 
  -8  -3  -2    1.68    0.38 
  -8  -3  -2    1.75    0.29 
   8   3   2    0.74    0.36 
   8   3   2    1.04    0.43 
   8   3   2    1.51    0.28 
   8   3   2    1.03    0.36 
   8   3   2    1.15    0.23 
  -9  -3  -2    6.08    0.43 
  -9  -3  -2    6.38    0.30 
   9   3   2    6.31    0.23 
   9   3   2    5.56    0.46 
   9   3   2    6.14    0.30 
   9   3   2    5.51    0.39 
   9   3   2    6.00    0.41 
 -10  -3  -2   39.17    0.76 
 -10  -3  -2   39.10    0.92 
  10   3   2   37.68    0.82 
  10   3   2   39.48    0.76 
  10   3   2   38.57    0.97 
 -11  -3  -2   10.05    0.47 
 -11  -3  -2    8.64    0.56 
  11   3   2    7.89    0.61 
  11   3   2    9.74    0.46 
  11   3   2    8.70    0.58 
 -12  -3  -2    2.09    0.44 
 -12  -3  -2    2.33    0.59 
  12   3   2    1.48    0.42 
  12   3   2    1.15    0.55 
  12   3   2    2.07    0.66 
 -13  -3  -2   15.11    0.62 
 -13  -3  -2   14.91    0.45 
  13   3   2   13.60    0.59 
  13   3   2   14.80    0.69 
  13   3   2   14.66    0.46 
 -14  -3  -2    1.21    0.62 
 -14  -3  -2    1.56    0.42 
  14   3   2    0.90    0.47 
  14   3   2    1.78    0.71 
  14   3   2    1.07    0.62 
 -15  -3  -2   -0.08    0.43 
 -15  -3  -2    0.52    0.69 
  15   3   2    0.06    0.65 
  15   3   2    0.00    0.45 
  15   3   2   -0.69    0.74 
 -16  -3  -2    0.90    0.51 
  16   3   2    1.34    0.71 
  16   3   2    1.17    0.51 
  17   3   2    1.40    0.77 
  18   3   2    6.27    0.83 
  19   3   2    3.26    0.87 
  18  -4  -2    2.34    0.83 
  17  -4  -2    0.85    0.79 
 -17   4   2   -0.38    0.72 
  16  -4  -2    1.50    0.95 
  16  -4  -2    1.59    0.74 
 -16   4   2    1.15    0.76 
  15  -4  -2    2.70    0.73 
  15  -4  -2    1.66    0.88 
 -15   4   2    1.41    0.71 
  14  -4  -2    8.67    0.91 
  14  -4  -2    8.13    0.72 
 -14   4   2    8.77    0.70 
  13  -4  -2    6.49    0.78 
  13  -4  -2    6.14    0.66 
 -13   4   2    6.78    0.46 
 -13   4   2    6.54    0.64 
  12  -4  -2   27.35    0.64 
  12  -4  -2   28.06    0.81 
 -12   4   2   28.86    0.47 
 -12   4   2   29.04    0.64 
  11  -4  -2    3.60    0.63 
  11  -4  -2    3.33    0.51 
 -11   4   2    3.91    0.36 
 -11   4   2    3.89    0.57 
  10  -4  -2    1.74    0.56 
  10  -4  -2    1.82    0.43 
 -10   4   2    1.90    0.33 
 -10   4   2    2.52    0.51 
   9  -4  -2   14.43    0.44 
   9  -4  -2   13.68    0.52 
  -9   4   2   14.75    0.33 
  -9   4   2   14.51    0.47 
   8  -4  -2   97.37    1.12 
   8  -4  -2   99.27    1.23 
  -8   4   2   99.27    1.07 
  -8   4   2   98.17    1.17 
   7  -4  -2    8.09    0.47 
   7  -4  -2    7.96    0.38 
   7  -4  -2    8.63    0.30 
  -7   4   2    9.17    0.43 
  -7   4   2    8.30    0.30 
   6  -4  -2    9.38    0.24 
   6  -4  -2    9.31    0.35 
   6  -4  -2    9.26    0.29 
   6  -4  -2    9.51    0.23 
  -6   4   2    9.57    0.23 
  -6   4   2   10.17    0.32 
   5  -4  -2   52.21    0.55 
   5  -4  -2   52.64    0.63 
   5  -4  -2   53.66    0.53 
   5  -4  -2   53.32    0.51 
  -5   4   2   52.94    0.48 
  -5   4   2   53.47    0.51 
  -5   4   2   54.14    0.61 
   4  -4  -2   93.61    1.07 
   4  -4  -2   93.10    1.08 
   4  -4  -2   94.06    1.08 
  -4   4   2   91.62    1.05 
  -4   4   2   93.02    1.06 
   3  -4  -2   -0.19    0.24 
   3  -4  -2   -0.05    0.20 
   3  -4  -2    0.08    0.24 
   3  -4  -2    0.00    0.18 
  -3   4   2   -0.26    0.25 
  -3   4   2    0.02    0.22 
  -3   4   2    0.26    0.15 
   2  -4  -2  273.37    4.46 
   2  -4  -2  268.81    4.46 
   2  -4  -2  270.21    4.48 
   2  -4  -2  267.94    4.47 
  -2   4   2  265.64    4.45 
  -2   4   2  270.34    4.48 
   1  -4  -2   65.39    0.77 
  -1   4   2   66.64    0.72 
  -1   4   2   64.67    0.77 
   0  -4  -2  136.57    1.51 
   0  -4  -2  136.74    1.47 
   0  -4  -2  136.32    1.54 
   0  -4  -2  137.64    1.52 
   0   4   2  135.79    1.46 
   0   4   2  136.75    1.51 
  -1  -4  -2    1.82    0.27 
  -1  -4  -2    1.36    0.17 
  -1  -4  -2    1.71    0.16 
  -1  -4  -2    1.93    0.17 
  -1  -4  -2    1.59    0.46 
  -1  -4  -2    1.83    0.24 
  -1  -4  -2    1.28    0.19 
   1   4   2    1.31    0.18 
   1   4   2    1.57    0.14 
   1   4   2    1.84    0.27 
   1   4   2    1.84    0.26 
   1   4   2    1.77    0.46 
   1   4   2    1.34    0.18 
  -2  -4  -2   52.86    0.64 
  -2  -4  -2   53.40    0.74 
  -2  -4  -2   54.26    0.74 
  -2  -4  -2   52.77    0.63 
  -2  -4  -2   52.46    0.67 
  -2  -4  -2   51.94    0.85 
  -2  -4  -2   52.85    0.68 
   2   4   2   54.08    0.75 
   2   4   2   52.33    0.63 
   2   4   2   52.02    0.63 
   2   4   2   53.18    0.72 
   2   4   2   51.13    0.86 
   2   4   2   52.71    0.63 
   2   4   2   52.16    0.69 
   2   4   2   52.78    0.67 
  -3  -4  -2  116.51    1.64 
  -3  -4  -2  114.08    1.62 
  -3  -4  -2  121.52    1.82 
  -3  -4  -2  120.93    1.64 
  -3  -4  -2  116.68    1.70 
   3   4   2  121.20    1.83 
   3   4   2  116.65    1.65 
   3   4   2  119.98    1.63 
   3   4   2  117.20    1.70 
   3   4   2  118.84    1.63 
   3   4   2  114.09    1.62 
  -4  -4  -2   69.03    1.26 
  -4  -4  -2   70.08    1.34 
  -4  -4  -2   67.10    1.21 
  -4  -4  -2   70.28    1.23 
   4   4   2   69.47    1.21 
   4   4   2   70.57    1.52 
   4   4   2   70.76    1.27 
   4   4   2   69.31    1.22 
   4   4   2   68.29    1.23 
   4   4   2   69.41    1.31 
   4   4   2   66.41    1.20 
  -5  -4  -2    0.18    0.28 
  -5  -4  -2   -0.01    0.26 
  -5  -4  -2    0.13    0.20 
   5   4   2    0.20    0.26 
   5   4   2    0.45    0.27 
   5   4   2    0.09    0.24 
   5   4   2    0.06    0.22 
   5   4   2    0.85    0.74 
   5   4   2   -0.09    0.29 
   5   4   2    0.37    0.31 
   5   4   2    0.06    0.18 
  -6  -4  -2   54.79    0.97 
  -6  -4  -2   58.58    1.01 
  -6  -4  -2   58.65    1.05 
   6   4   2   56.59    0.99 
   6   4   2   56.60    1.11 
   6   4   2   55.73    0.97 
   6   4   2   58.85    1.08 
   6   4   2   57.06    0.96 
  -7  -4  -2    1.23    0.24 
  -7  -4  -2    1.39    0.34 
   7   4   2    1.05    0.31 
   7   4   2    1.94    0.36 
   7   4   2    1.31    0.24 
   7   4   2    1.23    0.32 
   7   4   2    0.32    0.36 
   7   4   2    1.23    0.23 
  -8  -4  -2    0.68    0.27 
  -8  -4  -2    0.92    0.38 
   8   4   2    0.63    0.42 
   8   4   2    0.74    0.37 
   8   4   2    0.68    0.25 
   8   4   2   -0.03    0.36 
   8   4   2    1.00    0.27 
  -9  -4  -2   11.54    0.39 
  -9  -4  -2   13.02    0.54 
   9   4   2   11.90    0.57 
   9   4   2   10.30    0.48 
   9   4   2   11.39    0.37 
   9   4   2   11.79    0.50 
   9   4   2   11.16    0.38 
 -10  -4  -2    0.40    0.32 
 -10  -4  -2    0.83    0.47 
  10   4   2    0.04    0.43 
  10   4   2    0.31    0.23 
  10   4   2    0.52    0.32 
  10   4   2    0.19    0.49 
 -11  -4  -2    0.51    0.49 
 -11  -4  -2    0.16    0.35 
  11   4   2    0.16    0.34 
  11   4   2   -0.01    0.57 
  11   4   2   -0.26    0.46 
 -12  -4  -2    5.25    0.56 
 -12  -4  -2    4.93    0.41 
  12   4   2    5.21    0.41 
  12   4   2    4.79    0.61 
  12   4   2    5.25    0.55 
 -13  -4  -2    1.80    0.60 
 -13  -4  -2    0.84    0.39 
  13   4   2    1.22    0.60 
  13   4   2    0.59    0.64 
  13   4   2    1.08    0.41 
 -14  -4  -2    2.33    0.42 
 -14  -4  -2    2.44    0.63 
  14   4   2    1.94    0.69 
  14   4   2    2.76    0.63 
  14   4   2    2.18    0.44 
 -15  -4  -2   13.90    0.46 
  15   4   2   14.30    0.67 
  15   4   2   14.24    0.49 
 -16  -4  -2    5.25    0.52 
  16   4   2    5.98    0.74 
  16   4   2    5.43    0.56 
 -17  -4  -2    2.39    0.58 
  17   4   2    1.48    0.52 
  17   4   2    3.00    0.79 
  18   4   2    4.23    0.79 
  19   4   2    1.53    0.88 
  18  -5  -2    0.46    0.84 
  17  -5  -2   -0.12    0.79 
 -17   5   2   -0.38    0.87 
  16  -5  -2    0.66    0.75 
  16  -5  -2    0.91    0.94 
 -16   5   2    0.88    0.74 
  15  -5  -2    2.01    0.94 
  15  -5  -2    0.77    0.74 
 -15   5   2    0.76    0.70 
  14  -5  -2   -0.18    0.79 
  14  -5  -2    0.42    0.68 
 -14   5   2    0.06    0.67 
  13  -5  -2   21.81    0.79 
  13  -5  -2   21.50    0.62 
 -13   5   2   22.08    0.61 
 -13   5   2   22.55    0.42 
  12  -5  -2    1.07    0.68 
  12  -5  -2    0.84    0.61 
 -12   5   2    2.13    0.42 
 -12   5   2    2.67    0.58 
  11  -5  -2    1.38    0.64 
  11  -5  -2    1.18    0.55 
 -11   5   2    1.22    0.37 
 -11   5   2    2.31    0.59 
  10  -5  -2    8.29    0.48 
  10  -5  -2    8.71    0.59 
 -10   5   2    8.88    0.50 
 -10   5   2    8.21    0.34 
   9  -5  -2    8.16    0.54 
   9  -5  -2    8.89    0.44 
  -9   5   2    9.31    0.31 
  -9   5   2    9.38    0.47 
   8  -5  -2   -0.07    0.38 
   8  -5  -2    0.44    0.28 
   8  -5  -2   -0.17    0.48 
  -8   5   2   -0.70    0.21 
  -8   5   2    0.58    0.41 
   7  -5  -2   15.76    0.32 
   7  -5  -2   16.41    0.46 
   7  -5  -2   15.61    0.38 
   7  -5  -2   16.51    0.36 
  -7   5   2   17.14    0.42 
  -7   5   2   16.55    0.33 
   6  -5  -2    6.42    0.38 
   6  -5  -2    6.35    0.28 
   6  -5  -2    6.80    0.28 
   6  -5  -2    6.15    0.32 
  -6   5   2    6.97    0.29 
  -6   5   2    6.74    0.20 
  -6   5   2    7.25    0.36 
   5  -5  -2   36.39    0.72 
   5  -5  -2   36.05    0.73 
   5  -5  -2   37.33    0.72 
   5  -5  -2   35.27    0.80 
  -5   5   2   37.76    0.73 
  -5   5   2   37.14    0.77 
  -5   5   2   37.77    0.70 
  -5   5   2   35.56    0.67 
   4  -5  -2  122.52    1.16 
   4  -5  -2  120.19    1.21 
   4  -5  -2  122.78    1.17 
   4  -5  -2  123.00    1.20 
  -4   5   2  121.02    1.19 
  -4   5   2  123.67    1.19 
  -4   5   2  123.16    1.15 
   3  -5  -2    4.85    0.25 
   3  -5  -2    5.63    0.32 
   3  -5  -2    5.66    0.24 
   3  -5  -2    5.72    0.21 
  -3   5   2    6.09    0.31 
  -3   5   2    5.43    0.23 
  -3   5   2    5.94    0.18 
   2  -5  -2   14.77    0.46 
   2  -5  -2   14.58    0.36 
  -2   5   2   15.79    0.36 
  -2   5   2   14.59    0.48 
   1  -5  -2   34.59    0.80 
  -1   5   2   33.57    0.78 
  -1   5   2   34.39    0.70 
   0  -5  -2  415.00    6.74 
   0  -5  -2  416.89    6.80 
   0  -5  -2  415.12    6.78 
   0  -5  -2  420.03    6.83 
   0   5   2  407.65    6.78 
  -1  -5  -2  415.58    5.89 
  -1  -5  -2  408.22    5.75 
  -1  -5  -2  412.21    5.81 
  -1  -5  -2  402.22    5.82 
  -1  -5  -2  415.78    5.80 
   1   5   2  416.53    5.77 
   1   5   2  413.30    5.80 
   1   5   2  414.22    5.80 
  -2  -5  -2   62.71    0.80 
  -2  -5  -2   61.22    0.73 
  -2  -5  -2   63.15    0.86 
  -2  -5  -2   61.27    0.74 
  -2  -5  -2   63.02    0.73 
   2   5   2   62.50    0.72 
   2   5   2   62.94    0.83 
   2   5   2   62.18    0.80 
  -3  -5  -2  277.75    4.22 
  -3  -5  -2  272.61    4.22 
  -3  -5  -2  283.17    4.18 
  -3  -5  -2  280.54    4.16 
  -3  -5  -2  286.68    4.17 
  -3  -5  -2  279.97    4.31 
  -3  -5  -2  278.24    4.16 
  -3  -5  -2  281.88    4.19 
   3   5   2  275.75    4.15 
   3   5   2  280.96    4.21 
   3   5   2  282.81    4.16 
   3   5   2  285.91    4.18 
   3   5   2  273.48    4.22 
   3   5   2  279.99    4.19 
   3   5   2  281.48    4.15 
   3   5   2  284.28    4.32 
  -4  -5  -2   17.59    0.40 
  -4  -5  -2   18.54    0.45 
  -4  -5  -2   17.85    0.60 
  -4  -5  -2   19.74    0.68 
  -4  -5  -2   18.41    0.47 
  -4  -5  -2   19.61    0.52 
  -4  -5  -2   17.11    0.44 
   4   5   2   17.70    0.40 
   4   5   2   18.97    0.60 
   4   5   2   17.12    0.46 
   4   5   2   19.10    0.43 
   4   5   2   19.91    0.52 
   4   5   2   18.83    0.41 
   4   5   2   18.98    0.86 
   4   5   2   17.96    0.45 
  -5  -5  -2  189.11    2.64 
  -5  -5  -2  189.51    2.66 
  -5  -5  -2  193.14    2.65 
  -5  -5  -2  191.71    2.63 
  -5  -5  -2  189.65    2.72 
   5   5   2  191.13    2.64 
   5   5   2  193.07    2.72 
   5   5   2  191.94    2.64 
   5   5   2  192.24    2.70 
   5   5   2  189.81    2.67 
   5   5   2  193.25    2.67 
   5   5   2  190.94    2.86 
   5   5   2  190.14    2.63 
  -6  -5  -2    0.54    0.22 
  -6  -5  -2    0.46    0.29 
  -6  -5  -2    0.72    0.31 
   6   5   2    0.27    0.21 
   6   5   2    0.71    0.30 
   6   5   2    0.82    0.82 
   6   5   2    1.51    0.34 
   6   5   2    0.34    0.28 
   6   5   2    0.55    0.33 
   6   5   2    0.35    0.28 
  -7  -5  -2   73.11    0.86 
  -7  -5  -2   71.07    0.75 
   7   5   2   72.93    0.90 
   7   5   2   70.66    0.74 
   7   5   2   71.78    0.79 
   7   5   2   72.88    1.26 
   7   5   2   71.46    0.73 
   7   5   2   70.51    0.93 
  -8  -5  -2   32.25    0.53 
  -8  -5  -2   32.71    0.51 
   8   5   2   32.77    0.52 
   8   5   2   31.23    0.53 
   8   5   2   32.87    1.16 
   8   5   2   31.91    0.55 
   8   5   2   30.59    0.50 
   8   5   2   32.16    0.44 
   8   5   2   32.37    0.50 
  -9  -5  -2   20.46    0.64 
  -9  -5  -2   20.78    0.77 
   9   5   2   20.77    0.62 
   9   5   2   20.45    0.67 
   9   5   2   19.90    0.51 
   9   5   2   20.03    0.59 
   9   5   2   20.59    0.76 
 -10  -5  -2   53.63    0.85 
 -10  -5  -2   54.02    0.71 
  10   5   2   52.50    0.75 
  10   5   2   53.76    0.72 
  10   5   2   54.34    0.69 
  10   5   2   55.93    0.87 
  10   5   2   53.85    0.57 
 -11  -5  -2    0.02    0.36 
 -11  -5  -2   -0.17    0.50 
  11   5   2   -0.02    0.35 
  11   5   2   -0.60    0.53 
  11   5   2   -0.38    0.47 
  11   5   2   -0.19    0.45 
  11   5   2   -0.28    0.25 
 -12  -5  -2    1.59    0.40 
 -12  -5  -2    1.50    0.53 
  12   5   2    1.51    0.52 
  12   5   2    1.23    0.49 
  12   5   2    1.44    0.37 
  12   5   2    0.56    0.59 
 -13  -5  -2   -0.06    0.39 
 -13  -5  -2    0.02    0.58 
  13   5   2   -0.12    0.50 
  13   5   2   -0.17    0.56 
  13   5   2   -0.27    0.42 
  13   5   2   -0.24    0.62 
 -14  -5  -2    2.31    0.61 
 -14  -5  -2    2.69    0.44 
  14   5   2    2.45    0.68 
  14   5   2    1.82    0.51 
  14   5   2    2.86    0.44 
  14   5   2    2.71    0.60 
 -15  -5  -2    0.29    0.43 
  15   5   2    0.35    0.49 
  15   5   2    0.68    0.66 
  15   5   2   -1.06    0.65 
 -16  -5  -2    4.10    0.53 
  16   5   2    4.26    0.69 
  16   5   2    3.99    0.51 
 -17  -5  -2    3.00    0.52 
  17   5   2    4.49    0.75 
  18   5   2   -2.55    1.91 
  18   5   2    1.63    0.78 
  19   5   2    1.45    0.90 
  18  -6  -2    0.12    0.88 
  17  -6  -2   -0.09    0.81 
  16  -6  -2    0.31    0.79 
 -16   6   2   -0.14    0.77 
  15  -6  -2    3.68    0.87 
  15  -6  -2    3.44    0.74 
 -15   6   2    3.00    0.69 
  14  -6  -2    1.36    0.80 
  14  -6  -2    1.13    0.68 
 -14   6   2    1.34    0.66 
  13  -6  -2    3.48    0.77 
  13  -6  -2    3.65    0.65 
 -13   6   2    3.91    0.60 
  12  -6  -2    8.13    0.65 
  12  -6  -2    8.97    0.73 
 -12   6   2    9.58    0.59 
 -12   6   2    8.33    0.41 
  11  -6  -2    1.41    0.69 
  11  -6  -2    1.07    0.57 
 -11   6   2    0.72    0.36 
 -11   6   2    1.67    0.59 
  10  -6  -2   -0.75    0.48 
  10  -6  -2   -0.66    0.56 
 -10   6   2   -0.47    0.48 
 -10   6   2   -0.77    0.30 
   9  -6  -2   25.08    0.51 
   9  -6  -2   26.41    0.62 
   9  -6  -2   26.09    0.39 
  -9   6   2   26.37    0.52 
   8  -6  -2    9.19    0.41 
   8  -6  -2    9.78    0.33 
   8  -6  -2    8.90    0.49 
  -8   6   2   10.46    0.44 
  -8   6   2   10.43    0.21 
   7  -6  -2   53.73    0.81 
   7  -6  -2   55.70    0.79 
   7  -6  -2   54.33    0.76 
   7  -6  -2   53.84    0.89 
  -7   6   2   54.78    0.73 
  -7   6   2   55.59    0.76 
  -7   6   2   55.12    0.85 
   6  -6  -2    0.50    0.27 
   6  -6  -2    0.70    0.30 
   6  -6  -2    0.37    0.32 
   6  -6  -2    0.25    0.36 
  -6   6   2    0.06    0.30 
  -6   6   2    0.38    0.22 
  -6   6   2    0.66    0.32 
   5  -6  -2  121.31    1.61 
   5  -6  -2  122.34    1.60 
   5  -6  -2  123.15    1.59 
   5  -6  -2  122.87    1.63 
  -5   6   2  123.07    1.61 
  -5   6   2  121.77    1.57 
  -5   6   2  124.13    1.61 
   4  -6  -2    1.35    0.21 
   4  -6  -2    1.58    0.31 
   4  -6  -2    1.20    0.26 
   4  -6  -2    2.02    0.29 
  -4   6   2    1.56    0.31 
  -4   6   2    0.96    0.17 
   3  -6  -2   49.00    0.78 
   3  -6  -2   47.78    0.70 
   3  -6  -2   48.67    0.69 
   3  -6  -2   47.68    0.74 
  -3   6   2   47.29    0.68 
  -3   6   2   48.72    0.77 
  -2   6   2   17.57    0.14 
  -2   6   2   18.07    0.14 
  -2   6   2   18.00    0.32 
   1  -6  -2   94.04    1.08 
  -1   6   2   95.74    1.08 
   0  -6  -2   27.80    0.40 
   0  -6  -2   27.71    0.37 
   0   6   2   27.93    0.40 
  -1  -6  -2   31.14    0.47 
  -1  -6  -2   30.56    0.90 
  -1  -6  -2   29.95    0.59 
  -1  -6  -2   31.95    0.68 
   1   6   2   29.98    0.61 
   1   6   2   30.78    0.46 
  -2  -6  -2    7.98    0.26 
  -2  -6  -2    7.89    0.16 
  -2  -6  -2    7.51    0.20 
  -2  -6  -2    7.53    0.66 
  -2  -6  -2    7.57    0.18 
  -2  -6  -2    7.96    0.32 
  -2  -6  -2    7.78    0.30 
  -2  -6  -2    7.65    0.14 
   2   6   2    7.81    0.21 
   2   6   2    7.99    0.30 
   2   6   2    7.82    0.12 
   2   6   2    7.08    0.55 
   2   6   2    7.88    0.21 
  -3  -6  -2   84.05    1.31 
  -3  -6  -2   81.55    1.23 
  -3  -6  -2   80.78    1.18 
  -3  -6  -2   80.56    1.18 
   3   6   2   81.48    1.15 
   3   6   2   83.07    1.16 
   3   6   2   77.98    1.40 
   3   6   2   81.89    1.23 
   3   6   2   84.32    1.28 
  -4  -6  -2  357.75    3.66 
  -4  -6  -2  352.44    3.73 
  -4  -6  -2  354.51    3.68 
  -4  -6  -2  349.14    3.72 
  -4  -6  -2  352.19    3.65 
  -4  -6  -2  352.96    3.66 
  -4  -6  -2  357.01    3.68 
   4   6   2  357.12    3.68 
   4   6   2  356.54    3.64 
   4   6   2  351.68    3.64 
   4   6   2  356.05    3.65 
   4   6   2  350.79    3.72 
   4   6   2  354.60    3.83 
   4   6   2  355.46    3.72 
   4   6   2  353.08    3.68 
  -5  -6  -2   27.94    0.56 
  -5  -6  -2   25.98    0.31 
  -5  -6  -2   27.17    0.29 
  -5  -6  -2   26.81    0.40 
  -5  -6  -2   26.68    0.34 
  -5  -6  -2   27.01    0.37 
  -5  -6  -2   26.14    0.34 
   5   6   2   26.81    0.38 
   5   6   2   25.75    0.35 
   5   6   2   26.94    0.47 
   5   6   2   27.03    0.28 
   5   6   2   26.61    0.31 
   5   6   2   26.59    0.36 
   5   6   2   26.99    0.85 
  -6  -6  -2   22.68    0.79 
  -6  -6  -2   22.34    0.52 
  -6  -6  -2   23.66    0.56 
   6   6   2   23.20    0.53 
   6   6   2   22.17    0.73 
   6   6   2   24.13    1.02 
   6   6   2   21.27    0.53 
   6   6   2   20.95    0.62 
   6   6   2   21.81    0.49 
  -7  -6  -2   61.77    1.04 
  -7  -6  -2   63.54    1.13 
   7   6   2   62.88    1.14 
   7   6   2   62.50    1.48 
   7   6   2   62.13    1.05 
   7   6   2   61.88    1.03 
   7   6   2   61.12    1.22 
   7   6   2   62.20    1.03 
  -8  -6  -2   19.26    0.46 
  -8  -6  -2   20.15    0.37 
   8   6   2   19.67    0.39 
   8   6   2   21.15    0.50 
   8   6   2   18.74    0.44 
   8   6   2   19.63    0.43 
   8   6   2   18.26    0.47 
   8   6   2   20.01    0.36 
   8   6   2   19.04    1.12 
  -9  -6  -2    8.26    0.32 
  -9  -6  -2    9.57    0.47 
   9   6   2    9.43    1.21 
   9   6   2    8.51    0.31 
   9   6   2    8.82    0.42 
   9   6   2    9.02    0.34 
   9   6   2    8.35    0.49 
   9   6   2    8.04    0.41 
 -10  -6  -2   10.31    0.37 
 -10  -6  -2   10.34    0.49 
  10   6   2   11.88    0.50 
  10   6   2   10.50    0.48 
  10   6   2   11.09    0.37 
  10   6   2   11.02    0.34 
  10   6   2   11.07    1.34 
  10   6   2    9.33    0.50 
 -11  -6  -2    1.00    0.35 
 -11  -6  -2    1.72    0.51 
  11   6   2    1.12    0.48 
  11   6   2    1.60    0.29 
  11   6   2    0.70    0.52 
  11   6   2    1.42    0.44 
  11   6   2    1.32    1.39 
  11   6   2    1.53    0.35 
 -12  -6  -2    6.56    0.57 
 -12  -6  -2    6.12    0.43 
  12   6   2    6.04    0.39 
  12   6   2    5.84    0.60 
  12   6   2    5.56    1.52 
  12   6   2    6.18    0.55 
  12   6   2    5.36    0.47 
 -13  -6  -2    5.56    0.43 
 -13  -6  -2    5.06    0.58 
  13   6   2    5.27    0.46 
  13   6   2    4.32    1.55 
  13   6   2    5.42    0.57 
  13   6   2    4.96    0.41 
  13   6   2    5.32    0.63 
 -14  -6  -2    0.58    0.64 
 -14  -6  -2    0.39    0.46 
  14   6   2   -0.04    0.48 
  14   6   2   -0.13    0.91 
  14   6   2   -1.46    1.59 
  14   6   2    0.25    0.42 
  14   6   2    0.31    0.59 
 -15  -6  -2    3.47    0.49 
  15   6   2    2.54    0.48 
  15   6   2    3.29    0.64 
  15   6   2    0.62    1.65 
 -16  -6  -2    0.95    0.49 
  16   6   2    1.99    0.62 
  16   6   2    1.85    0.68 
  16   6   2   -1.40    1.75 
  17   6   2    0.64    0.73 
  17   6   2   -2.07    1.85 
  18   6   2   -1.99    1.90 
  18   6   2    1.40    0.80 
  17  -7  -2    0.63    0.85 
  16  -7  -2    0.42    0.80 
  15  -7  -2    0.97    0.75 
 -15   7   2    1.23    0.73 
  14  -7  -2    0.85    0.83 
  14  -7  -2    0.13    0.73 
 -14   7   2    0.06    0.66 
  13  -7  -2    0.00    0.68 
  13  -7  -2    0.73    0.76 
 -13   7   2    1.10    0.66 
  12  -7  -2    2.84    0.74 
  12  -7  -2    2.75    0.66 
 -12   7   2    2.95    0.61 
 -12   7   2    2.55    0.41 
  11  -7  -2    7.26    0.69 
  11  -7  -2    7.41    0.66 
 -11   7   2    7.52    0.57 
  10  -7  -2    4.39    0.61 
  10  -7  -2    3.89    0.52 
 -10   7   2    5.40    0.19 
 -10   7   2    4.33    0.49 
   9  -7  -2    2.42    0.54 
   9  -7  -2    2.15    0.49 
  -9   7   2    2.58    0.45 
  -9   7   2    2.52    0.32 
   8  -7  -2   14.26    0.42 
   8  -7  -2   14.86    0.47 
  -8   7   2   14.94    0.43 
  -8   7   2   14.76    0.29 
   7  -7  -2   28.96    0.53 
   7  -7  -2   28.10    0.47 
   7  -7  -2   28.25    0.41 
  -7   7   2   28.76    0.46 
  -7   7   2   29.67    0.47 
  -7   7   2   28.11    0.35 
   6  -7  -2    0.98    0.27 
   6  -7  -2    1.17    0.33 
   6  -7  -2    1.25    0.37 
  -6   7   2    1.50    0.32 
  -6   7   2    0.89    0.22 
  -6   7   2    0.80    0.33 
   5  -7  -2   30.25    0.38 
   5  -7  -2   30.39    0.34 
   5  -7  -2   29.30    0.38 
  -5   7   2   31.00    0.31 
  -5   7   2   31.14    0.44 
  -5   7   2   29.49    0.36 
   4  -7  -2   31.22    0.51 
   4  -7  -2   29.54    0.51 
  -4   7   2   31.42    0.49 
  -4   7   2   31.67    0.59 
   3  -7  -2   55.08    0.81 
   3  -7  -2   54.11    0.77 
   3  -7  -2   54.14    0.78 
  -3   7   2   54.71    0.87 
  -3   7   2   51.91    0.76 
  -2   7   2   12.51    0.31 
  -1   7   2    9.14    0.35 
   0  -7  -2    6.63    0.34 
   0   7   2    7.76    0.38 
  -1  -7  -2    2.37    0.41 
  -1  -7  -2    2.18    0.31 
   1   7   2    1.93    0.36 
  -2  -7  -2    7.90    0.38 
  -2  -7  -2    8.10    0.31 
  -2  -7  -2    8.08    0.30 
  -2  -7  -2    7.06    0.44 
  -2  -7  -2    7.58    0.29 
  -2  -7  -2    7.50    0.39 
   2   7   2    7.25    0.28 
   2   7   2    8.02    0.37 
   2   7   2    8.56    0.43 
   2   7   2    8.41    0.49 
  -3  -7  -2    3.30    0.23 
  -3  -7  -2    2.87    0.19 
  -3  -7  -2    3.26    0.21 
  -3  -7  -2    3.37    0.30 
  -3  -7  -2    2.91    0.32 
  -3  -7  -2    2.73    0.16 
   3   7   2    2.91    0.14 
   3   7   2    3.24    0.23 
   3   7   2    3.20    0.31 
   3   7   2    3.02    0.23 
   3   7   2    3.51    0.61 
  -4  -7  -2    7.08    0.25 
  -4  -7  -2    7.22    0.37 
  -4  -7  -2    7.07    0.30 
  -4  -7  -2    7.99    0.31 
  -4  -7  -2    7.23    0.42 
  -4  -7  -2    7.88    0.33 
   4   7   2    7.83    0.39 
   4   7   2    7.38    0.24 
   4   7   2    6.92    0.33 
   4   7   2    8.05    0.33 
   4   7   2    7.25    0.77 
   4   7   2    7.84    0.29 
   4   7   2    7.63    0.24 
  -5  -7  -2    0.34    0.29 
  -5  -7  -2    0.53    0.37 
  -5  -7  -2   -0.09    0.26 
  -5  -7  -2    0.69    0.35 
  -5  -7  -2    0.75    0.27 
  -5  -7  -2    0.52    0.20 
   5   7   2    0.59    0.19 
   5   7   2    0.24    0.32 
   5   7   2   -0.14    0.76 
   5   7   2    0.12    0.33 
   5   7   2    0.77    0.28 
   5   7   2    0.21    0.29 
   5   7   2    0.54    0.23 
   5   7   2    0.68    0.34 
  -6  -7  -2   21.66    0.52 
  -6  -7  -2   23.48    0.58 
  -6  -7  -2   22.73    0.65 
  -6  -7  -2   23.89    0.86 
  -6  -7  -2   23.66    0.55 
   6   7   2   22.95    0.54 
   6   7   2   22.93    0.72 
   6   7   2   22.27    0.57 
   6   7   2   24.26    1.12 
   6   7   2   21.10    0.54 
   6   7   2   23.01    0.72 
   6   7   2   23.06    0.53 
  -7  -7  -2    8.05    0.47 
  -7  -7  -2    7.44    0.40 
  -7  -7  -2    8.66    0.32 
  -7  -7  -2    7.19    0.36 
   7   7   2    7.50    0.39 
   7   7   2    8.07    0.39 
   7   7   2    8.44    0.30 
   7   7   2    7.44    0.98 
   7   7   2    7.17    0.41 
   7   7   2    7.88    0.36 
   7   7   2    8.80    0.45 
  -8  -7  -2   56.89    0.94 
  -8  -7  -2   56.46    1.03 
   8   7   2   56.31    0.95 
   8   7   2   56.32    0.92 
   8   7   2   57.13    1.47 
   8   7   2   56.63    1.04 
   8   7   2   55.82    1.05 
   8   7   2   56.26    0.92 
   8   7   2   58.22    1.52 
  -9  -7  -2   -0.22    0.31 
  -9  -7  -2   -0.24    0.43 
   9   7   2   -0.70    0.45 
   9   7   2    0.42    1.14 
   9   7   2   -0.11    0.29 
   9   7   2    0.04    0.39 
   9   7   2    0.37    0.33 
   9   7   2    0.39    0.39 
 -10  -7  -2    4.91    0.37 
 -10  -7  -2    5.05    0.48 
  10   7   2    4.29    0.53 
  10   7   2    5.12    0.35 
  10   7   2    5.04    0.33 
  10   7   2    5.26    0.44 
  10   7   2    6.18    1.31 
 -11  -7  -2    0.34    0.52 
 -11  -7  -2    0.54    0.38 
  11   7   2    0.20    0.34 
  11   7   2    0.32    1.37 
  11   7   2    0.42    0.48 
  11   7   2    0.39    0.42 
  11   7   2    0.64    0.33 
  11   7   2   -0.35    0.51 
 -12  -7  -2   -0.33    0.54 
 -12  -7  -2    0.69    0.40 
  12   7   2   -0.02    0.38 
  12   7   2    0.42    0.46 
  12   7   2   -0.97    1.49 
  12   7   2   -0.77    0.57 
  12   7   2   -0.19    0.52 
 -13  -7  -2    1.22    0.40 
 -13  -7  -2    1.05    0.57 
  13   7   2    1.04    0.39 
  13   7   2    0.83    0.61 
  13   7   2    2.01    1.57 
  13   7   2    1.04    0.57 
  13   7   2    1.06    0.45 
 -14  -7  -2    5.60    0.46 
  14   7   2    5.65    0.42 
  14   7   2    6.05    0.47 
  14   7   2    5.55    1.62 
  14   7   2    6.32    0.60 
 -15  -7  -2    2.25    0.50 
  15   7   2    2.28    1.75 
  15   7   2    2.62    0.68 
  15   7   2    2.53    0.53 
  16   7   2    1.28    0.68 
  16   7   2   -0.53    1.75 
  17   7   2    2.39    0.72 
  17   7   2    1.01    1.93 
  18   7   2    0.69    0.75 
  18   7   2   -0.77    1.87 
  17  -8  -2    5.19    0.88 
  16  -8  -2    1.33    0.81 
  15  -8  -2    1.13    0.78 
  14  -8  -2    1.75    0.71 
 -14   8   2    1.23    0.70 
  13  -8  -2    0.73    0.80 
  13  -8  -2    0.49    0.72 
 -13   8   2   -0.09    0.62 
  12  -8  -2    0.76    0.69 
  12  -8  -2    1.30    0.73 
 -12   8   2    0.59    0.64 
  11  -8  -2    3.37    0.69 
  11  -8  -2    2.70    0.65 
 -11   8   2    2.53    0.41 
 -11   8   2    3.77    0.58 
  10  -8  -2    2.99    0.54 
  10  -8  -2    3.05    0.65 
 -10   8   2    3.37    0.38 
 -10   8   2    3.62    0.50 
   9  -8  -2   -0.12    0.50 
   9  -8  -2   -0.61    0.51 
  -9   8   2    0.24    0.44 
  -9   8   2   -0.02    0.32 
   8  -8  -2    3.31    0.45 
   8  -8  -2    3.41    0.48 
  -8   8   2    3.70    0.28 
  -8   8   2    4.26    0.41 
   7  -8  -2   44.69    0.80 
   7  -8  -2   45.72    0.86 
   7  -8  -2   47.18    0.76 
  -7   8   2   46.83    0.81 
  -7   8   2   47.45    0.72 
  -7   8   2   47.16    0.78 
   6  -8  -2   15.98    0.42 
   6  -8  -2   16.53    0.37 
   6  -8  -2   15.74    0.43 
  -6   8   2   17.41    0.48 
  -6   8   2   15.97    0.39 
   5  -8  -2   30.73    0.71 
   5  -8  -2   32.97    0.79 
   5  -8  -2   31.43    0.74 
  -5   8   2   33.39    0.75 
  -5   8   2   32.17    0.80 
  -5   8   2   30.69    0.68 
   4  -8  -2    7.29    0.33 
   4  -8  -2    8.41    0.31 
   4  -8  -2    8.30    0.35 
  -4   8   2    9.29    0.32 
   3  -8  -2   28.84    0.48 
  -3   8   2   28.70    0.63 
  -3   8   2   28.65    0.45 
  -3   8   2   29.55    0.45 
  -2   8   2    9.24    0.48 
  -1   8   2   17.19    0.53 
   0  -8  -2    0.88    0.32 
   0   8   2    1.32    0.36 
  -1  -8  -2   42.47    1.24 
   1   8   2   42.42    1.17 
  -2  -8  -2   18.58    0.27 
  -2  -8  -2   18.16    0.43 
  -2  -8  -2   18.48    0.25 
  -2  -8  -2   18.06    0.37 
   2   8   2   18.73    0.41 
   2   8   2   18.35    0.20 
  -3  -8  -2  126.96    1.93 
  -3  -8  -2  128.48    2.06 
  -3  -8  -2  127.44    1.92 
  -3  -8  -2  131.89    1.95 
  -3  -8  -2  124.76    2.05 
  -3  -8  -2  131.04    1.93 
   3   8   2  129.26    2.03 
   3   8   2  128.26    1.99 
   3   8   2  127.71    1.91 
   3   8   2  130.30    1.95
[truncated: 2,120,550 more chars]
